# Supplementary material for: Global, regional, and national causes of under-5 mortality in 2000–19: an updated systematic analysis with implications for the Sustainable Development Goals
Source: PubMed Central journal article supplement (PMC8786667; doi:10.1016/s2352-4642(21)00311-4), 2022-02
Supplement: mmc1.pdf [file mmc1.pdf]

# THE LANCET

## Child & Adolescent Health

### Supplementary appendix

This appendix formed part of the original submission and has been peer reviewed. We post it as supplied by the authors.

Supplement to: Perin J, Mulick A, Yeung D, et al. Global, regional, and national causes of under-5 mortality in 2000–19: an updated systematic analysis with implications for the Sustainable Development Goals. *Lancet Child Adolesc Health* 2021; published online Nov 17. [https://doi.org/10.1016/S2352-4642\(21\)00311-4](https://doi.org/10.1016/S2352-4642(21)00311-4).

Progress towards the Sustainable Development  
Goals: Global, regional, and national causes of  
under-five mortality during 2000-2019

Appendices

2021-11-05



# Contents

|                                                                                                                                                     |            |
|-----------------------------------------------------------------------------------------------------------------------------------------------------|------------|
| <b>Appendix 1 Details of the updated systematic review</b>                                                                                          | <b>5</b>   |
| <b>Appendix 2: Updated study data points</b>                                                                                                        | <b>29</b>  |
| <b>Appendix 3: Method details</b>                                                                                                                   | <b>31</b>  |
| ICD codes and cause of death . . . . .                                                                                                              | 31         |
| Methods neonatal mortality . . . . .                                                                                                                | 33         |
| Methods 1-59 month mortality . . . . .                                                                                                              | 38         |
| <b>Appendix 4: Weight of random effects in nationally representative studies</b>                                                                    | <b>43</b>  |
| <b>Appendix 5: Convergence of fixed effects (trace plots)</b>                                                                                       | <b>57</b>  |
| <b>Appendix 6: GATHER checklist</b>                                                                                                                 | <b>91</b>  |
| <b>Appendix 7: Countries with very low under-5 mortality</b>                                                                                        | <b>95</b>  |
| <b>Appendix 8: Distribution of causes of child death in UNICEF regions in 2000 and 2019</b>                                                         | <b>97</b>  |
| <b>Appendix 9: Average Annual rate of reduction by cause in all countries with 50 or more under-five deaths in 2019 for 2000-2015 and 2015-2019</b> | <b>101</b> |





# Appendix 1 Details of the updated systematic review

**Appendix 1: Details of the updated systematic review of the neonatal and postneonatal VA studies published between January 1, 2015 and December 31, 2017, no language restrictions**

| Database | Search Terms                                                                                                                                                                                                                                                                                                                                                                                                                                                                                                                                                                                                                                                                                                                                                                                                                                                                                                                                                                                                                                                                                                                                                                                                                                                                                                                                                                                                                                                                                                                                                                                                                                                                                                                                                                                                                                                                                                                                                                                                                                                                                                                                                                                                                                                                                                                                                                                                                                                                                                                                                                                                                                                                                                                                                                                                                                                                                                                                                                                                                                                                                                                                                                                                                                                                                                                                                                                                                                                                                                                                                                                                                                                                                                                                                                                                                                                                                                                                                                                                                                                                                                                                                                                                                                                                                                                                                                                                                                                                                                                                                                                                                                                                                                                                                                                                                                                                                                                                                                                                                                                                                                                                                                                                                                                                                                                                                                                                                                                                                                                                                                                                                                                                                                                                                                                                                                                                                                   | Date conducted   |
|----------|----------------------------------------------------------------------------------------------------------------------------------------------------------------------------------------------------------------------------------------------------------------------------------------------------------------------------------------------------------------------------------------------------------------------------------------------------------------------------------------------------------------------------------------------------------------------------------------------------------------------------------------------------------------------------------------------------------------------------------------------------------------------------------------------------------------------------------------------------------------------------------------------------------------------------------------------------------------------------------------------------------------------------------------------------------------------------------------------------------------------------------------------------------------------------------------------------------------------------------------------------------------------------------------------------------------------------------------------------------------------------------------------------------------------------------------------------------------------------------------------------------------------------------------------------------------------------------------------------------------------------------------------------------------------------------------------------------------------------------------------------------------------------------------------------------------------------------------------------------------------------------------------------------------------------------------------------------------------------------------------------------------------------------------------------------------------------------------------------------------------------------------------------------------------------------------------------------------------------------------------------------------------------------------------------------------------------------------------------------------------------------------------------------------------------------------------------------------------------------------------------------------------------------------------------------------------------------------------------------------------------------------------------------------------------------------------------------------------------------------------------------------------------------------------------------------------------------------------------------------------------------------------------------------------------------------------------------------------------------------------------------------------------------------------------------------------------------------------------------------------------------------------------------------------------------------------------------------------------------------------------------------------------------------------------------------------------------------------------------------------------------------------------------------------------------------------------------------------------------------------------------------------------------------------------------------------------------------------------------------------------------------------------------------------------------------------------------------------------------------------------------------------------------------------------------------------------------------------------------------------------------------------------------------------------------------------------------------------------------------------------------------------------------------------------------------------------------------------------------------------------------------------------------------------------------------------------------------------------------------------------------------------------------------------------------------------------------------------------------------------------------------------------------------------------------------------------------------------------------------------------------------------------------------------------------------------------------------------------------------------------------------------------------------------------------------------------------------------------------------------------------------------------------------------------------------------------------------------------------------------------------------------------------------------------------------------------------------------------------------------------------------------------------------------------------------------------------------------------------------------------------------------------------------------------------------------------------------------------------------------------------------------------------------------------------------------------------------------------------------------------------------------------------------------------------------------------------------------------------------------------------------------------------------------------------------------------------------------------------------------------------------------------------------------------------------------------------------------------------------------------------------------------------------------------------------------------------------------------------------------------------------------------------------|------------------|
| Pubmed   | <p>(((((((((("Infant"[mesh] OR "Infant, Newborn"[mesh] OR "child"[mesh] OR "Child, Preschool"[Mesh] OR "Minors"[Mesh] OR "infant"[tw] OR "infants"[tw] OR "neonate"[tw] OR "neonates"[tw] OR "neonatal"[tw] OR "newborn"[tw] OR "newborns"[tw] OR "new-born"[tw] OR "new-borns"[tw] OR "baby"[tw] OR "babies"[tw] OR "Premature"[tw] OR "preterm"[tw] OR "pre term"[tw] OR "child"[tw] OR "children"[tw] OR "youth"[tw] OR "youths"[tw] OR "young people"[tw] OR "childhood"[tw] OR "toddler"[tw] OR "toddlers"[tw] OR "kid"[tw] OR "kids"[tw] OR "young patient"[tw] OR "young patients"[tw] OR "boy"[tw] OR "boys"[tw] OR "girl"[tw] OR "girls"[tw] OR "young age"[tw] OR "pediatric"[tw] OR "pre-schooler"[tw] OR "preschooler"[tw] OR "under 5"[tw] OR "under five"[tw] OR "under fives"[tw] OR "less than five"[tw] OR "perinatal"[tw])))))))</p> <p>AND</p> <p>("Mortality"[MeSH] OR "Mortality"[tw] OR "Mortalities"[tw] OR "fatal"[tw] OR "fatality"[tw] OR "fatalities"[tw] OR "Death"[MeSH] OR "death"[tw] OR "deaths"[tw]))</p> <p>AND</p> <p>(((((((((("Meningitis"[Mesh] OR "Meningitis"[tw] OR "Meningitides"[tw] OR "Pachymeningitis"[tw] OR "Pachymeningitides"[tw] OR "Arachnoiditis"[tw] OR "Arachnoiditides"[tw] OR "Arachnoid Membrane inflammation"[tw] OR "Arachnoid Membrane inflammations"[tw] OR "Meningoencephalitis"[tw] OR "Meningoencephalitis"[tw] OR "Meningocephalitis"[tw] OR "Meningocephalitis"[tw] OR "Cerebromeningitis" OR "Cerebromeningitides" OR "Encephalomeningitis"[tw] OR "Encephalomeningitides"[tw] OR "Haemophilus influenzae"[tw] OR "Haemophilus parainfluenzae"[tw] OR "Cerebritis"[tw] OR "Cerebritides"[tw] OR "Waterhouse-Friederichsen Syndrome"[tw] OR "Waterhouse-Friederichsen Syndrome"[tw] OR "Waterhouse-Friederichsen Syndrome"[tw] OR "Waterhouse-Friederichsen Syndrome"[tw] OR "Purpura Fulminans"[tw] OR "Meningococcal"[tw] OR "Meningeal"[tw] OR "Cerebral Cryptococcosis"[tw] OR "Cerebral Cryptococcoses"[tw] OR "Toruloma"[tw] OR "Torulomas"[tw] OR "Lymphocytic Choriomeningitis"[tw] OR "Armstrong Syndrome"[tw] OR "Armstrong's Syndrome"[tw] OR "Encephalitis"[Mesh] AND "Encephalitis"[tw] OR "Encephalitides"[tw] OR "encephalitis"[tw] OR "brain inflammation"[tw] OR "brain inflammations"[tw] OR "Rasmussen syndrome"[tw] OR "Rasmussen's syndrome"[tw] OR "Cerebral Ventriculitis"[tw] OR "Cerebral Ventriculitides"[tw] OR "Infectious Ventriculitis"[tw] OR "Infectious Ventriculitides"[tw] OR "Encephalomyelitis"[tw] OR "Meningoencephalitis"[tw] OR "Meningoencephalitis"[tw] OR "Cerebromeningitis"[tw] OR "Cerebromeningitides"[tw] OR "Encephalomeningitis"[tw] OR "Encephalomeningitides"[tw] OR "myeloencephalitis"[tw] OR "Lupus Vasculitis"[tw] OR "Central Nervous System Lupus"[tw] OR "Lupus Erythematosus"[tw] OR "Lupus Erythematosus"[tw] OR "brain vasculitis"[tw] OR "brain angitis"[tw] OR "brain arteritis"[tw] OR "cerebral arteritis"[tw] OR "cerebral vasculitis" OR "Neisseria meningitidis"[Mesh] OR "Neisseria meningitidis"[tw] OR "Neisseria meningitides"[tw] OR "Micrococcus intracellularis"[tw] OR "Neisseria weichselbaumi"[tw] OR "Meningococcus"[tw] OR "meningococemia"[tw] OR "meningococci"[tw] OR "Meningococcal Infections"[Mesh] OR "meningococcal"[tw] OR "meningococcaemia"[tw] OR "sepsis"[MeSH] OR "sepsis"[tw] OR "Pyemia"[tw] OR "Pyemias"[tw] OR "Pyohemia"[tw] OR "Pyohemias"[tw] OR "Pyemia"[tw] OR "Pyemias"[tw] OR "Septicemia"[tw] OR "Septicemias"[tw] OR "Blood Poisoning"[tw] OR "Blood Poisonings"[tw] OR "septic"[tw] OR "sepsis"[tw])))) OR ("premature birth"[MeSH] OR "premature"[tw] OR "preterm"[tw] OR "pre-mature"[tw] OR "pre-term"[tw] OR "prematurity"[tw] OR "prematurnitas"[tw])) OR ("rubella"[MeSH] OR "rubella"[tw] OR "measles"[tw] OR "epidemic roseola" OR "necrosis"[MeSH] OR "necrosis"[tw] OR "necrotic"[tw] OR "necroses"[tw] OR "necrotizing"[tw] OR "Infarction"[tw] OR "infarctions"[tw] OR "birth injuries"[MeSH] OR "birth injuries"[tw] OR "birth injury"[tw] OR "birth trauma"[tw] OR "Obstetric Paralysis"[tw] OR "Obstetric Paralysis"[tw] OR "Obstetrical Paralysis"[tw] OR "Obstetrical Paralysis"[tw] OR "Obstetrical Paralysis"[tw] OR "birth damage"[tw] OR "birth lesion"[tw] OR "birth palsy"[tw] OR "birth paralysis"[tw] OR "obstetric palsy"[tw] OR "obstetrical palsy"[tw] OR "brachial palsy"[tw] OR "brachial paralysis"[tw] OR "brachial plexus paralysis"[tw] OR "delivery trauma"[tw] OR "arm paralysis"[tw] OR "paralysis brachialis"[tw] OR "jaundice"[MeSH] OR "jaundice"[tw] OR "jaundices"[tw] OR "Icterus"[tw] OR "bronze baby syndrome"[tw] OR "erythroleukoblastosis"[tw] OR "hemorrhage"[MeSH] OR "hemorrhage"[tw] OR "haemorrhage"[tw] OR "haemorrhagic"[tw] OR "Hemorrhagic"[tw])) OR ("tetanus"[MeSH] OR "tetanus"[tw] OR "tetani"[tw] OR "diphtheria-tetanus-pertussis"[tw])) OR ("asphyxia"[MeSH] OR "asphyxia"[tw] OR "Asphyxia Neonatorum"[MeSH] OR "Asphyxia Neonatorum"[tw] OR "hypoxia"[tw] OR "Asphyxias"[tw] OR "Suffocation"[tw] OR "Suffocations"[tw] OR "anoxia"[tw] OR ("intrapartum"[tw] AND "related"[tw])) OR ("congenital abnormalities"[MeSH] OR "congenital"[tw] OR "Deformities"[tw] OR "Deformity"[tw] OR "Birth Defects"[tw] OR "Birth Defect"[tw] OR "abnormality"[tw] OR "abnormalities"[tw] OR "malformation"[tw] OR "malformations"[tw] OR "malformative"[tw] OR "malformed"[tw] OR "neural tube defects"[MeSH] OR "neural tube"[tw] OR "Craniorachischisis"[tw] OR "Craniorachischises"[tw] OR "Diastematomyelia"[tw] OR "Diastematomyelias"[tw] OR "Tethered Cord"[tw] OR "Spinal Dysraphism"[tw] OR "Tethered Spinal Cord"[tw] OR "Spinal Dysraphisms"[tw] OR "Iniencephaly"[tw] OR "Iniencephalies"[tw] OR "Neurenteric"[tw] OR "Neuroenteric"[tw] OR "Spinal Cord Myelodysplasia"[tw] OR "Spinal Cord Myelodysplasias"[tw] OR "Acrania"[tw] OR "Acrantias"[tw] OR</p> | January 12, 2018 |

|                                                                                                                                                                                                                                                                                                                                                                                                                                                                                                                                                                                                                                                                                                                                                                                                                                                                                                                                                                                                                                                                                                                                                                                                                                                                                                                                                                                                                                                                                                                                                                                                                                                                                                                                                                                                                                                                                                                                                                                                                                                                                                                                                                                                                                                                                                                                                                                                                                                                                                                                                                                                                                                                                                                                                                                                                                                                                                                                                                                                                                                                                                                                                                                                                                                                                                                                                                                                                                                                                                                                                                                                                                                                                                                                                                                                                                                                                                                                                                                                                                                                                                                                                                                                                                                                                                                                                                                                                                                                                                                                                                                                                                                                                                                                                                                                                                                                                                                                                                                                                                                                                                                                                                                                                                                                                                                                                                                                                                                                                                                                                                                                                                                                                                                                                                                                                                                                                                                                                                                                                                                                                                                                                                                                                                                                                                                                                                                                                                                                                                                                                                                                                                                                                                                                                                                                                                       |
|---------------------------------------------------------------------------------------------------------------------------------------------------------------------------------------------------------------------------------------------------------------------------------------------------------------------------------------------------------------------------------------------------------------------------------------------------------------------------------------------------------------------------------------------------------------------------------------------------------------------------------------------------------------------------------------------------------------------------------------------------------------------------------------------------------------------------------------------------------------------------------------------------------------------------------------------------------------------------------------------------------------------------------------------------------------------------------------------------------------------------------------------------------------------------------------------------------------------------------------------------------------------------------------------------------------------------------------------------------------------------------------------------------------------------------------------------------------------------------------------------------------------------------------------------------------------------------------------------------------------------------------------------------------------------------------------------------------------------------------------------------------------------------------------------------------------------------------------------------------------------------------------------------------------------------------------------------------------------------------------------------------------------------------------------------------------------------------------------------------------------------------------------------------------------------------------------------------------------------------------------------------------------------------------------------------------------------------------------------------------------------------------------------------------------------------------------------------------------------------------------------------------------------------------------------------------------------------------------------------------------------------------------------------------------------------------------------------------------------------------------------------------------------------------------------------------------------------------------------------------------------------------------------------------------------------------------------------------------------------------------------------------------------------------------------------------------------------------------------------------------------------------------------------------------------------------------------------------------------------------------------------------------------------------------------------------------------------------------------------------------------------------------------------------------------------------------------------------------------------------------------------------------------------------------------------------------------------------------------------------------------------------------------------------------------------------------------------------------------------------------------------------------------------------------------------------------------------------------------------------------------------------------------------------------------------------------------------------------------------------------------------------------------------------------------------------------------------------------------------------------------------------------------------------------------------------------------------------------------------------------------------------------------------------------------------------------------------------------------------------------------------------------------------------------------------------------------------------------------------------------------------------------------------------------------------------------------------------------------------------------------------------------------------------------------------------------------------------------------------------------------------------------------------------------------------------------------------------------------------------------------------------------------------------------------------------------------------------------------------------------------------------------------------------------------------------------------------------------------------------------------------------------------------------------------------------------------------------------------------------------------------------------------------------------------------------------------------------------------------------------------------------------------------------------------------------------------------------------------------------------------------------------------------------------------------------------------------------------------------------------------------------------------------------------------------------------------------------------------------------------------------------------------------------------------------------------------------------------------------------------------------------------------------------------------------------------------------------------------------------------------------------------------------------------------------------------------------------------------------------------------------------------------------------------------------------------------------------------------------------------------------------------------------------------------------------------------------------------------------------------------------------------------------------------------------------------------------------------------------------------------------------------------------------------------------------------------------------------------------------------------------------------------------------------------------------------------------------------------------------------------------------------------------------------------------------------------------|
| <p>"Exencephaly"[tw] OR "Exencephalies"[tw] OR "dysgraphia"[tw] OR "dysraphic"[tw] OR "dysraphism"[tw] OR "dysraphy"[tw] OR "NTD"[tw] OR "NTDS"[tw] OR "sudden infant death syndrome"[MeSH] OR "sudden infant death"[tw] OR "sid"[tw] OR "SIDS"[tw] OR "cot death"[tw] OR "cot deaths"[tw] OR "crib death"[tw] OR "fetal alcohol spectrum disorders"[MeSH] OR "Fetal alcohol spectrum"[tw] OR "Foetal alcohol spectrum"[tw] OR "FASD"[tw] OR "FASDs"[tw] OR "Fetal Alcohol Syndrome"[tw] OR "Alcohol-Related Birth Defects"[tw] OR "Alcohol Related Birth Defects"[tw] OR "Alcohol Related Neurodevelopmental Disorder"[tw] OR "FAE"[tw] OR "Fetal Alcohol Effects"[tw] OR "FAEs"[tw] OR "Fetal Alcohol Syndrome"[tw] OR "Fetus Alcohol Syndrome"[tw] OR "Foetal alcohol syndrome"[tw]) OR ("Nutrition disorders"[MeSH] OR "malnutrition"[tw] OR "Nutritional"[tw] OR "Undernutrition"[tw] OR "Malnourishment"[tw] OR "Malnourishments"[tw] OR "Deficiency"[tw] OR "Deficiencies"[tw] OR "Refeeding Syndrome"[tw] OR "Starvation"[tw] OR "Starvations"[tw] OR "Famine"[tw] OR "Famines"[tw] OR "deficient"[tw] OR "underfeeding"[tw] OR "undernourishment"[tw] OR "nutrition"[tw] OR "Hypervitaminosis"[tw])) OR ("Malaria"[Mesh] OR "malaria"[tw] OR "malarias"[tw] OR "Plasmodium Infection"[tw] OR "Plasmodium Infections"[tw] OR "Plasmodium falciparum"[Mesh] OR "Plasmodium falciparum"[tw] OR "Plasmodium falciparums"[tw] OR "malaria, falciparum"[mesh] OR "blackwater fever"[tw] OR "blackwater fevers"[tw] OR "black water fever"[tw] OR "black water fevers"[tw] OR "remittent fever"[tw] OR "paludism"[tw] OR "plasmodium infection"[tw] OR "plasmodium infections"[tw] OR "marsh fever"[tw] OR "falciparum infection"[tw] OR "Plasmodium vivax"[Mesh] OR "Plasmodium vivax"[tw] OR "Plasmodium vivax"[tw] OR "malaria, vivax"[mesh] OR "vivax infection"[tw] OR "Plasmodium ovale"[Mesh] OR "Plasmodium ovale"[tw] OR "Plasmodium ovales"[tw] OR "Plasmodium malariae"[Mesh] OR "Plasmodium malariae"[tw]) OR ("Pneumonia"[Mesh] OR "pneumonia"[tw] OR "pneumonias"[tw] OR "pneumonitis"[tw] OR "pulmonary inflammation"[tw] OR "pulmonary inflammations"[tw] OR "lung inflammation"[tw] OR "Lung Inflammations"[tw] OR "inflammatory lung disease"[tw] OR "lobitis"[tw] OR "peripneumonia"[tw] OR "pleuropneumonia"[tw] OR "pleuropneumonitis"[tw] OR "pneumonitis"[tw] OR "pulmonal inflammation"[tw] OR "pulmonary inflammation"[tw] OR "pulmonic inflammation"[tw] OR "bronchopneumonia"[tw] OR "bronchopneumonias"[tw] OR "Respiratory Tract Infections"[Mesh] OR "Respiratory Tract Infections"[tw] OR "Respiratory Tract Infection"[tw] OR "Respiratory Infection"[tw] OR "Respiratory Infections"[tw] OR "whooping cough"[tw] OR "pertussis"[tw] OR "pulmonary tract infection"[tw] OR "respiration infection"[tw] OR "Bronchiolitis"[tw] OR "bronchitis"[tw] OR "bronchopulmonary infection"[tw] OR "Croup"[mesh] OR "Croup"[tw] OR "diphtheria"[tw] OR "laryngitis"[tw] OR "Severe Acute Respiratory Syndrome"[Mesh] OR "Severe Acute Respiratory Syndrome"[tw] OR "SARS"[tw] OR "Acute Chest Syndrome"[Mesh] OR "acute chest syndrome"[tw] OR "acute chest syndromes"[tw] OR "Acute Lower Respiratory Infection"[tw] OR "Acute Lower Respiratory Infections"[tw] OR "ALRI"[tw] OR "LRI"[tw] OR "ARI"[tw] OR "respiration tract infection"[tw] OR "respiration tract infections"[tw] OR "legionnaire disease"[tw] OR "legionnaires disease"[tw] OR "legionnaires disease"[tw] OR "Pontiac fever"[tw] OR "lung infiltrate"[tw] OR "lung infiltration"[tw] OR "pulmonary infiltrate"[tw] OR "pulmonary infiltration"[tw] OR "pneumonic lung"[tw] OR "rds"[tw] OR "respiratory distress"[tw] OR "respiration distress"[tw]) OR ("Diarrhea"[Mesh] OR "Diarrhea"[tw] OR "Diarrheas"[tw] OR "Diarrheal"[tw] OR "diarrhoeal"[tw] OR "diarrhoea"[tw] OR "diarrhoeas"[tw] OR "Dysentery"[Mesh] OR "Dysentery"[tw] OR "dysentery"[tw] OR "enteritis"[tw] OR "enteritides"[tw] OR "Cholera"[Mesh] OR "Cholera"[tw] OR "Choleras"[tw] OR "vibrio Cholerae"[tw] OR "Gastroenteritis"[Mesh] OR "gastroenteritis"[tw] OR "gastroenteritides"[tw] OR "gastro enteritis"[tw] OR "gastroduodenitis"[tw] OR "gastrointestinal acute infection"[tw] OR "gastrointestinal acute infections"[tw] OR "gastrointestinal infection"[tw] OR "gastrointestinal infections"[tw] OR "digestive tract infection"[tw] OR "digestive tract infections"[tw] OR "digestive infection"[tw] OR "gastrointestinal tract infection"[tw] OR "gastrointestine tract infection"[tw]) OR "Noncommunicable Diseases"[MeSH] OR "Noncommunicable"[tw] OR "Non-communicable"[tw] OR "communicable"[tw] OR "non-infectious"[tw] OR "infectious"[tw] OR "noninfectious"[tw] OR "Communicable Diseases"[MeSH] OR "Infant, Newborn, Diseases"[MeSH] OR "newborn"[tw] OR "neonatal"[tw] OR "perinatal"[tw]))</p> <p>AND</p> <p>("Argentina"[tw] OR "Bolivia"[tw] OR "Brazil"[tw] OR "Brasil"[tw] OR "Chile"[tw] OR "Colombia"[tw] OR "Ecuador"[tw] OR "French Guiana"[tw] OR "Guyana"[tw] OR "Paraguay"[tw] OR "Peru"[tw] OR "Suriname"[tw] OR "Uruguay"[tw] OR "Venezuela"[tw] OR "Mexico"[tw] OR "Belize"[tw] OR "Costa Rica"[tw] OR "El Salvador"[tw] OR "Guatemala"[tw] OR "Honduras"[tw] OR "Nicaragua"[tw] OR "Puerto Rico"[tw] OR "Panama"[tw] OR "West Indies"[tw] OR "Antigua"[tw] OR "Barbuda"[tw] OR "Bahamas"[tw] OR "Barbados"[tw] OR "Cuba"[tw] OR "Dominica"[tw] OR "Dominican Republic"[tw] OR "Grenada"[tw] OR "Guadeloupe"[tw] OR "Haiti"[tw] OR "Jamaica"[tw] OR "Martinique"[tw] OR "Antilles"[tw] OR "Anguilla"[tw] OR "Saint Kitts"[tw] OR "St Kitts"[tw] OR "Saint Lucia"[tw] OR "St Lucia"[tw] OR "Saint Vincent"[tw] OR "St Vincent"[tw] OR "Trinidad"[tw] OR "Tobago"[tw] OR "Virgin Islands"[tw] OR "Kazakhstan"[tw] OR "Kyrgyzstan"[tw] OR "Tajikistan"[tw] OR "Turkmenistan"[tw] OR "Uzbekistan"[tw] OR "Borneo"[tw] OR "Brunei"[tw] OR "Cambodia"[tw] OR "East Timor"[tw] OR "Indonesia"[tw] OR "Laos"[tw] OR "Malaysia"[tw] OR "Mekong Valley"[tw] OR "Myanmar"[tw] OR "Burma"[tw] OR "Philippines"[tw] OR "Singapore"[tw] OR "Thailand"[tw] OR "Vietnam"[tw] OR "Bangladesh"[tw] OR "Bhutan"[tw] OR "India"[tw] OR "Nepal"[tw] OR "Pakistan"[tw] OR "Sri Lanka"[tw] OR "China"[tw] OR "Korea"[tw] OR "Macao"[tw] OR "Macau"[tw] OR "Mongolia"[tw] OR "Taiwan"[tw] OR "Afghanistan"[tw] OR "Bahrain"[tw] OR "Iran"[tw] OR "Iraq"[tw] OR "Israel"[tw] OR "Jordan"[tw] OR "Kuwait"[tw] OR "Lebanon"[tw] OR "Oman"[tw] OR "Qatar"[tw] OR "Saudi Arabia"[tw] OR "Syria"[tw] OR "Turkey"[tw] OR "United Arab Emirates"[tw] OR "Yemen"[tw] OR "Fiji"[tw] OR "New Caledonia"[tw] OR "Papua New Guinea"[tw] OR "Vanuatu"[tw] OR "Micronesia"[tw] OR "Melanesia"[tw] OR "Guam"[tw] OR "Palau"[tw] OR "Polynesia"[tw] OR "Samoa"[tw] OR</p> |
|---------------------------------------------------------------------------------------------------------------------------------------------------------------------------------------------------------------------------------------------------------------------------------------------------------------------------------------------------------------------------------------------------------------------------------------------------------------------------------------------------------------------------------------------------------------------------------------------------------------------------------------------------------------------------------------------------------------------------------------------------------------------------------------------------------------------------------------------------------------------------------------------------------------------------------------------------------------------------------------------------------------------------------------------------------------------------------------------------------------------------------------------------------------------------------------------------------------------------------------------------------------------------------------------------------------------------------------------------------------------------------------------------------------------------------------------------------------------------------------------------------------------------------------------------------------------------------------------------------------------------------------------------------------------------------------------------------------------------------------------------------------------------------------------------------------------------------------------------------------------------------------------------------------------------------------------------------------------------------------------------------------------------------------------------------------------------------------------------------------------------------------------------------------------------------------------------------------------------------------------------------------------------------------------------------------------------------------------------------------------------------------------------------------------------------------------------------------------------------------------------------------------------------------------------------------------------------------------------------------------------------------------------------------------------------------------------------------------------------------------------------------------------------------------------------------------------------------------------------------------------------------------------------------------------------------------------------------------------------------------------------------------------------------------------------------------------------------------------------------------------------------------------------------------------------------------------------------------------------------------------------------------------------------------------------------------------------------------------------------------------------------------------------------------------------------------------------------------------------------------------------------------------------------------------------------------------------------------------------------------------------------------------------------------------------------------------------------------------------------------------------------------------------------------------------------------------------------------------------------------------------------------------------------------------------------------------------------------------------------------------------------------------------------------------------------------------------------------------------------------------------------------------------------------------------------------------------------------------------------------------------------------------------------------------------------------------------------------------------------------------------------------------------------------------------------------------------------------------------------------------------------------------------------------------------------------------------------------------------------------------------------------------------------------------------------------------------------------------------------------------------------------------------------------------------------------------------------------------------------------------------------------------------------------------------------------------------------------------------------------------------------------------------------------------------------------------------------------------------------------------------------------------------------------------------------------------------------------------------------------------------------------------------------------------------------------------------------------------------------------------------------------------------------------------------------------------------------------------------------------------------------------------------------------------------------------------------------------------------------------------------------------------------------------------------------------------------------------------------------------------------------------------------------------------------------------------------------------------------------------------------------------------------------------------------------------------------------------------------------------------------------------------------------------------------------------------------------------------------------------------------------------------------------------------------------------------------------------------------------------------------------------------------------------------------------------------------------------------------------------------------------------------------------------------------------------------------------------------------------------------------------------------------------------------------------------------------------------------------------------------------------------------------------------------------------------------------------------------------------------------------------------------------------------------------------------------------------|

|                      |                                                                                                                                                                                                                                                                                                                                                                                                                                                                                                                                                                                                                                                                                                                                                                                                                                                                                                                                                                                                                                                                                                                                                                                                                                                                                                                                                                                                                                                                                                                                                                                                                                                                                                                                                                                                                                                                                                                                                                                                                                                                                                                                                                                                                                                                                                                                                                                                                                                                                                                                                                                                                                                                                                                                                                                                                                                                               |                  |
|----------------------|-------------------------------------------------------------------------------------------------------------------------------------------------------------------------------------------------------------------------------------------------------------------------------------------------------------------------------------------------------------------------------------------------------------------------------------------------------------------------------------------------------------------------------------------------------------------------------------------------------------------------------------------------------------------------------------------------------------------------------------------------------------------------------------------------------------------------------------------------------------------------------------------------------------------------------------------------------------------------------------------------------------------------------------------------------------------------------------------------------------------------------------------------------------------------------------------------------------------------------------------------------------------------------------------------------------------------------------------------------------------------------------------------------------------------------------------------------------------------------------------------------------------------------------------------------------------------------------------------------------------------------------------------------------------------------------------------------------------------------------------------------------------------------------------------------------------------------------------------------------------------------------------------------------------------------------------------------------------------------------------------------------------------------------------------------------------------------------------------------------------------------------------------------------------------------------------------------------------------------------------------------------------------------------------------------------------------------------------------------------------------------------------------------------------------------------------------------------------------------------------------------------------------------------------------------------------------------------------------------------------------------------------------------------------------------------------------------------------------------------------------------------------------------------------------------------------------------------------------------------------------------|------------------|
|                      | <p>"Tonga"[tw] OR "Armenia"[tw] OR "Azerbaijan"[tw] OR "Georgia"[tw] OR "Albania"[tw] OR "Estonia"[tw] OR "Latvia"[tw] OR "Lithuania"[tw] OR "Bosnia"[tw] OR "Herzegovina"[tw] OR "Serbia"[tw] OR "Bulgaria"[tw] OR "Belarus"[tw] OR "Croatia"[tw] OR "Czech Republic"[tw] OR "Hungary"[tw] OR "Macedonia"[tw] OR "Moldova"[tw] OR "Montenegro"[tw] OR "Poland"[tw] OR "Romania"[tw] OR "Russia"[tw] OR "Bashkiria"[tw] OR "Dagestan"[tw] OR "Slovakia"[tw] OR "Slovenia"[tw] OR "Ukraine"[tw] OR "Cameroon"[tw] OR "Central African Republic"[tw] OR "Chad"[tw] OR "Congo"[tw] OR "Equatorial Guinea"[tw] OR "Gabon"[tw] OR "Burundi"[tw] OR "Djibouti"[tw] OR "Eritrea"[tw] OR "Ethiopia"[tw] OR "Kenya"[tw] OR "Rwanda"[tw] OR "Somalia"[tw] OR "Sudan"[tw] OR "Tanzania"[tw] OR "Uganda"[tw] OR "Angola"[tw] OR "Botswana"[tw] OR "Lesotho"[tw] OR "Malawi"[tw] OR "Mozambique"[tw] OR "Namibia"[tw] OR "South Africa"[tw] OR "Swaziland"[tw] OR "Zambia"[tw] OR "Zimbabwe"[tw] OR "Benin"[tw] OR "Burkina Faso"[tw] OR "Cote d'Ivoire"[tw] OR "Gambia"[tw] OR "Ghana"[tw] OR "Guinea"[tw] OR "Guinea-Bissau"[tw] OR "Liberia"[tw] OR "Mali"[tw] OR "Mauritania"[tw] OR "Niger"[tw] OR "Nigeria"[tw] OR "Senegal"[tw] OR "Sierra Leone"[tw] OR "Togo"[tw] OR "Algeria"[tw] OR "Egypt"[tw] OR "Libya"[tw] OR "Morocco"[tw] OR "Tunisia"[tw] OR "Comoros"[tw] OR "Madagascar"[tw] OR "Mauritius"[tw] OR "Reunion"[tw] OR "Seychelles"[tw] OR "Cabo Verde"[tw] OR "Kiribati"[tw] OR "Marshall Islands"[tw] OR "Nauru"[tw] OR "Niue"[tw] OR "Sao Tome and Principe"[tw] OR "Solomon Islands"[tw] OR "South Sudan"[tw] OR "province"[tw] OR "provinces"[tw] OR "Developing Countries"[MeSH] OR "Developing"[tw] OR "Least Developed"[tw] OR "Less-Developed"[tw] OR "Less Developed"[tw] OR "Under-Developed"[tw] OR "Under Developed"[tw] OR "UnderDeveloped"[tw] OR "third-world"[tw] OR "third world"[tw] OR "Africa"[MeSH] OR "Africa"[tw] OR "Caribbean Region"[MeSH] OR "Caribbean Region"[tw] OR "West Indies"[tw] OR "Pacific Islands"[MeSH] OR "Pacific Islands"[tw] OR "Micronesia"[tw] OR "Melanesia"[tw] OR "Polynesia"[tw] OR "Mexico"[MeSH] OR "Mexico"[tw] OR "Latin America"[MeSH] OR "Latin America"[tw] OR "South America"[MeSH] OR "South America"[tw] OR "Indian Ocean Islands"[MeSH] OR "Indian Ocean Islands"[tw] OR "Pemba"[tw] OR "Cocos"[tw] OR "Maldives"[tw] OR "Central America"[MeSH] OR "Central America"[tw] OR "Asia"[MeSH] OR "Asia"[tw] OR "far east"[tw] OR "province"[tw] OR "provinces"[tw] OR "district"[tw] OR "districts"[tw] OR "prefecture"[tw] OR "prefectures"[tw] OR "county" OR "counties"[tw] OR "municipality"[tw] OR "municipalities"[tw]))</p> <p>NOT<br/>("animals"[MeSH] NOT ("humans"[MeSH] AND "animals"[MeSH]))</p> <p>NOT<br/>("case reports"[pt] OR "editorial"[pt] OR "comment"[pt] OR "practice guideline"[pt])</p> |                  |
| IndMed               | <p>Infant OR child OR Minors OR infants OR neonate OR neonates OR neonatal OR newborn OR newborns OR child OR children OR youth OR youths OR childhood OR toddler OR toddlers OR kid OR young OR pediatric OR under 5 OR under five OR less than five OR perinatal</p> <p>AND</p> <p>Mortality OR Death OR deaths OR cause of death OR mortalities OR causes of death OR case fatality OR fatal OR fatalities OR fatality</p> <p>AND</p> <p>Diarrhea OR Cholera OR Pneumonia OR Respiratory Infections OR Malaria OR Meningitis OR Encephalitis OR Dysentery OR gastroenteritis OR digestive tract infection OR gastrointestinal infection OR congenital abnormality OR preterm OR asphyxia OR tetanus</p>                                                                                                                                                                                                                                                                                                                                                                                                                                                                                                                                                                                                                                                                                                                                                                                                                                                                                                                                                                                                                                                                                                                                                                                                                                                                                                                                                                                                                                                                                                                                                                                                                                                                                                                                                                                                                                                                                                                                                                                                                                                                                                                                                                    | January 11, 2018 |
| Global Index Medicus | <p>(tw:("Infant" OR "Infant, Newborn" OR "child" OR "Child, Preschool" OR "Minors" OR "infant" OR "infants" OR "neonate" OR "neonates" OR "neonatal" OR "newborn" OR "newborns" OR "new-born" OR "new-borns" OR "baby" OR "babies" OR "Premature" OR "preterm" OR "pre term" OR "child" OR "children" OR "youth" OR "youths" OR "young people" OR "childhood" OR "toddler" OR "toddlers" OR "kid" OR "kids" OR "young patient" OR "young patients" OR "boy" OR "boys" OR "girl" OR "girls" OR "young age" OR "pediatric" OR "pre-schooler" OR "preschooler" OR "under 5" OR "under five" OR "under fives" OR "less than five" OR "perinatal"))</p> <p>AND</p> <p>(tw:("Mortality" OR "Mortality" OR "Mortalities" OR "fatal" OR "fatality" OR "fatalities" OR "Death" OR "death" OR "deaths" OR "Child Mortality"))</p> <p>AND</p> <p>(tw:("Diarrhea" OR "Diarrhea" OR "Diarrheas" OR "Diarrheal" OR "diarrhoeal" OR "diarrhoea" OR "diarrhoeas" OR "Dysentery" OR "Dysentery" OR "dysentery" OR "enteritis" OR "enteritides" OR "Cholera" OR "Cholera" OR "Choleras" OR "vibrio Cholerae" OR "Gastroenteritis" OR "gastroenteritis" OR "gastroenteritides" OR "gastro enteritis" OR "gastroduodenitis" OR "gastrointestinal acute infection" OR "gastrointestinal acute infections" OR "gastrointestinal infection" OR "gastrointestinal infections" OR "digestive tract infection" OR "digestive tract infections" OR "digestive infection" OR "gastrointestinal tract infection" OR "gastrointestinal tract infection" OR "Pneumonia" OR "pneumonia" OR "pneumonias" OR "pneumonitis" OR "pulmonary inflammation" OR "pulmonary inflammations" OR "lung inflammation" OR "Lung Inflammations" OR "inflammatory lung disease" OR "lobitis" OR "peripneumonia" OR "pleuropneumonia" OR "pleuropneumonitis" OR "pneumonitis" OR "pulmonal inflammation" OR "pulmonary inflammation" OR "pulmonic inflammation" OR "bronchopneumonia" OR "bronchopneumonias" OR "Respiratory Tract Infections" OR "Respiratory Tract Infections" OR "Respiratory Tract Infection" OR "Respiratory Infection" OR "Respiratory Infections" OR "whooping cough" OR "pertussis" OR "pulmonary tract infection" OR "respiration infection" OR "Bronchiolitis" OR "bronchitis" OR "bronchopulmonary infection" OR "Croup" OR "Croup" OR "diphtheria" OR "laryngitis" OR</p>                                                                                                                                                                                                                                                                                                                                                                                                                                                                                                                          | January 11, 2018 |

|                                                                                                                                                                                                                                                                                                                                                                                                                                                                                                                                                                                                                                                                                                                                                                                                                                                                                                                                                                                                                                                                                                                                                                                                                                                                                                                                                                                                                                                                                                                                                                                                                                                                                                                                                                                                                                                                                                                                                                                                                                                                                                                                                                                                                                                                                                                                                                                                                                                                                                                                                                                                                                                                                                                                                                                                                                                                                                                                                                                                                                                                                                                                                                                                                                                                                                                                                                                                                                                                                                                                                                                                                                                                                                                                                                                                                                                                                                                                                                                                                                                                                                                                                                                                                                                                                                                                                                                                                                                                                                                                                                                                                                                                                                                                                                                                                                                                                                                                                                                                                                                                                                                                                                                                                                                                                                                                                                                                                                                                                                                                                                                                                                                                                                                                                                                                                                                                                                                                                                                                                                                                                                                                                                                                                                                                                                                                                                                                                                                                                                                                                                                                                                                                                                                                                                                                                                                                                                       |
|-------------------------------------------------------------------------------------------------------------------------------------------------------------------------------------------------------------------------------------------------------------------------------------------------------------------------------------------------------------------------------------------------------------------------------------------------------------------------------------------------------------------------------------------------------------------------------------------------------------------------------------------------------------------------------------------------------------------------------------------------------------------------------------------------------------------------------------------------------------------------------------------------------------------------------------------------------------------------------------------------------------------------------------------------------------------------------------------------------------------------------------------------------------------------------------------------------------------------------------------------------------------------------------------------------------------------------------------------------------------------------------------------------------------------------------------------------------------------------------------------------------------------------------------------------------------------------------------------------------------------------------------------------------------------------------------------------------------------------------------------------------------------------------------------------------------------------------------------------------------------------------------------------------------------------------------------------------------------------------------------------------------------------------------------------------------------------------------------------------------------------------------------------------------------------------------------------------------------------------------------------------------------------------------------------------------------------------------------------------------------------------------------------------------------------------------------------------------------------------------------------------------------------------------------------------------------------------------------------------------------------------------------------------------------------------------------------------------------------------------------------------------------------------------------------------------------------------------------------------------------------------------------------------------------------------------------------------------------------------------------------------------------------------------------------------------------------------------------------------------------------------------------------------------------------------------------------------------------------------------------------------------------------------------------------------------------------------------------------------------------------------------------------------------------------------------------------------------------------------------------------------------------------------------------------------------------------------------------------------------------------------------------------------------------------------------------------------------------------------------------------------------------------------------------------------------------------------------------------------------------------------------------------------------------------------------------------------------------------------------------------------------------------------------------------------------------------------------------------------------------------------------------------------------------------------------------------------------------------------------------------------------------------------------------------------------------------------------------------------------------------------------------------------------------------------------------------------------------------------------------------------------------------------------------------------------------------------------------------------------------------------------------------------------------------------------------------------------------------------------------------------------------------------------------------------------------------------------------------------------------------------------------------------------------------------------------------------------------------------------------------------------------------------------------------------------------------------------------------------------------------------------------------------------------------------------------------------------------------------------------------------------------------------------------------------------------------------------------------------------------------------------------------------------------------------------------------------------------------------------------------------------------------------------------------------------------------------------------------------------------------------------------------------------------------------------------------------------------------------------------------------------------------------------------------------------------------------------------------------------------------------------------------------------------------------------------------------------------------------------------------------------------------------------------------------------------------------------------------------------------------------------------------------------------------------------------------------------------------------------------------------------------------------------------------------------------------------------------------------------------------------------------------------------------------------------------------------------------------------------------------------------------------------------------------------------------------------------------------------------------------------------------------------------------------------------------------------------------------------------------------------------------------------------------------------------------------------------------------------------------------------------------------|
| <p>"Severe Acute Respiratory Syndrome" OR "Severe Acute Respiratory Syndrome" OR "SARS" OR "Acute Chest Syndrome" OR "acute chest syndrome" OR "acute chest syndromes" OR "Acute Lower Respiratory Infection" OR "Acute Lower Respiratory Infections" OR "ALRI" OR "LRI" OR "ARI" OR "respiration tract infection" OR "respiration tract infections" OR "legionnaire disease" OR "legionnaires' disease" OR "legionnaires disease" OR "Pontiac fever" OR "lung infiltrate" OR "lung infiltration" OR "pulmonary infiltrate" OR "pulmonary infiltration" OR "pneumonic lung" OR "rds" OR "respiratory distress" OR "respiration distress" OR "Malaria" OR "malaria" OR "malarias" OR "Plasmodium Infection" OR "Plasmodium Infections" OR "Plasmodium falciparum" OR "Plasmodium falciparum" OR "Plasmodium falciparums" OR "malaria, falciparum" OR "blackwater fever" OR "blackwater fevers" OR "black water fever" OR "black water fevers" OR "remittent fever" OR "paludism" OR "plasmodium infection" OR "plasmodium infections" OR "marsh fever" OR "falciparum infection" OR "Plasmodium vivax" OR "Plasmodium vivax" OR "Plasmodium vivax" OR "malaria, vivax" OR "vivax infection" OR "Plasmodium ovale" OR "Plasmodium ovale" OR "Plasmodium ovals" OR "Plasmodium malariae" OR "Plasmodium malariae" OR "Meningitis" OR "Meningitis" OR "Meningitides" OR "Pachymeningitis" OR "Pachymeningitides" OR "Arachnoiditis" OR "Arachnoiditides" OR "Arachnoid Membrane inflammation" OR "Arachnoid Membrane inflammations" OR "Meningoencephalitis" OR "Meningoencephalitis" OR "Meningocephalitis" OR "Cerebromeningitis" OR "Encephalomeningitis" OR "Encephalomeningitides" OR "Haemophilus influenzae" OR "Haemophilus parainfluenzae" OR "Cerebromeningitides" OR "Cerebritis" OR "Cerebritides" OR "Waterhouse Friderichsen Syndrome" OR "Waterhouse Friderichsen Syndrome" OR "Waterhouse-Friderichsen Syndrome" OR "Waterhouse-Friderichsen Syndrome" OR "Purpura Fulminans" OR "Meningococcal" OR "Meningeal" OR "Cerebral Cryptococcosis" OR "Cerebral Cryptococcoses" OR "Toruloma" OR "Torulomas" OR "Lymphocytic Choriomeningitis" OR "Armstrong Syndrome" OR "Armstrong's Syndrome" OR "Encephalitis" OR "Encephalitis" OR "Encephalitides" OR "encephalitis" OR "brain inflammation" OR "brain inflammations" OR "Rasmussen syndrome" OR "Rasmussen's syndrome" OR "Cerebral Ventriculitis" OR "Cerebral Ventriculitides" OR "Infectious Ventriculitis" OR "Infectious Ventriculitides" OR "Encephalomyelitis" OR "Meningoencephalitis" OR "Meningoencephalitis" OR "Cerebromeningitis" OR "myeloencephalitis" OR "Lupus Vasculitis" OR "Central Nervous System Lupus" OR "Lupus Erythematosus" OR "Lupus Erythematosus" OR "brain vasculitis" OR "brain angiitis" OR "brain arteritis" OR "cerebral arteritis" OR "cerebral vasculitis" OR "Neisseria meningitidis" OR "Neisseria meningitidis" OR "Neisseria meningitides" OR "Micrococcus intracellularis" OR "Neisseria weichselbaumi" OR "Meningococcus" OR "meningococemia" OR "meningococci" OR "Meningococcal Infections" OR "meningococcal" OR "meningococcaemia" OR "sepsis" OR "sepsis" OR "Pyemia" OR "Pyemias" OR "Pyohemia" OR "Pyohemias" OR "Pyemia" OR "Pyemias" OR "Septicemia" OR "Septicemias" OR "Blood Poisoning" OR "Blood Poisonings" OR "septic" OR "sepsis" OR "congenital abnormalities" OR "congenital" OR "Deformities" OR "Deformity" OR "Birth Defects" OR "Birth Defect" OR "abnormality" OR "abnormalities" OR "malformation" OR "malformations" OR "malformative" OR "malformed" OR "neural tube defects" OR "neural tube" OR "Craniorachischisis" OR "Craniorachischises" OR "Diastematomyelia" OR "Diastematomyelias" OR "Tethered Cord" OR "Spinal Dysraphism" OR "Tethered Spinal Cord" OR "Spinal Dysraphisms" OR "Iniencephaly" OR "Iniencephalies" OR "Neurenteric" OR "Neuroenteric" OR "Spinal Cord Myelodysplasia" OR "Spinal Cord Myelodysplasias" OR "Acrania" OR "Acrantias" OR "Exencephaly" OR "Exencephalies" OR "dysgraphia" OR "dysraphic" OR "dysraphism" OR "dysraphy" OR "NTD" OR "NTDS" OR "sudden infant death syndrome" OR "sudden infant death" OR "sid" OR "SIDS" OR "cot death" OR "cot deaths" OR "crib death" OR "fetal alcohol spectrum disorders" OR "Fetal alcohol spectrum" OR "FASD" OR "FASDs" OR "FASDs" OR "Fetal Alcohol Syndrome" OR "Alcohol-Related Birth Defects" OR "Alcohol Related Neurodevelopmental Disorder" OR "FAE" OR "Fetal Alcohol Effects" OR "FAEs" OR "Fetal Alcohol Syndrome" OR "Fetus Alcohol Syndrome" OR "Foetal alcohol syndrome" OR "premature birth" OR "premature" OR "preterm" OR "pre-mature" OR "pre-term" OR "prematurity" OR "prematurnitas" OR "asphyxia" OR "asphyxia" OR "Asphyxia Neonatorum" OR "Asphyxia Neonatorum" OR "hypoxia" OR "Asphyxias" OR "Suffocation" OR "Suffocations" OR "anoxia" OR ("intrapartum" AND "related") OR "tetanus" OR "tetanus" OR "tetani" OR "diphtheria-tetanus-pertussis" OR "rubella" OR "rubella" OR "measles" OR "epidemic roseola" OR "necrosis" OR "necrosis" OR "necrotic" OR "necroses" OR "necrotizing" OR "Infarction" OR "infractions" OR "birth injuries" OR "birth injuries" OR "birth injury" OR "birth trauma" OR "Obstetric Paralysis" OR "Obstetric Paralysis" OR "Obstetrical Paralysis" OR "Obstetrical Paralysis" OR "birth damage" OR "birth lesion" OR "birth palsy" OR "birth paralysis" OR "obstetric palsy" OR "obstetrical palsy" OR "brachial palsy" OR "brachial paralysis" OR "brachial plexus paralysis" OR "delivery trauma" OR "arm paralysis" OR "paralysis brachialis" OR "jaundice" OR "jaundice" OR "jaundices" OR "Icterus" OR "bronze baby syndrome" OR "erythroleukoblastosis" OR "hemorrhage" OR "hemorrhage" OR "haemorrhage" OR "haemorrhagic" OR "Hemorrhagic" OR "Nutrition disorders" OR "malnutrition" OR "Nutritional" OR "Undernutrition" OR "Malnourishment" OR "Malnourishments" OR "Deficiency" OR "Deficiencies" OR "Refeeding Syndrome" OR "Starvation" OR "Starvations" OR "Famine" OR "Famines" OR "deficient" OR "underfeeding" OR "undernourishment" OR "nutrition" OR "Hypervitaminosis" OR "Noncommunicable Diseases" OR "Noncommunicable" OR "Non-communicable" OR "communicable" OR "non-infectious" OR "infectious" OR "noninfectious" OR "Communicable Diseases" OR "Infant, Newborn, Diseases" OR "newborn" OR "neonatal" OR "perinatal")</p> <p>AND</p> <p>(tw:( "Argentina" OR "Bolivia" OR "Brazil" OR "Brasil" OR "Chile" OR "Colombia" OR "Ecuador" OR "French Guiana" OR "Guyana" OR "Paraguay" OR "Peru" OR "Suriname" OR "Uruguay" OR "Venezuela" OR "Mexico" OR "Belize" OR "Costa Rica" OR "El Salvador" OR "Guatemala" OR "Honduras" OR "Nicaragua" OR "Puerto Rico" OR "Panama" OR "West Indies" OR "Antigua" OR "Barbuda" OR "Bahamas" OR "Barbados" OR "Cuba" OR "Dominica" OR "Dominican Republic"</p> |
|-------------------------------------------------------------------------------------------------------------------------------------------------------------------------------------------------------------------------------------------------------------------------------------------------------------------------------------------------------------------------------------------------------------------------------------------------------------------------------------------------------------------------------------------------------------------------------------------------------------------------------------------------------------------------------------------------------------------------------------------------------------------------------------------------------------------------------------------------------------------------------------------------------------------------------------------------------------------------------------------------------------------------------------------------------------------------------------------------------------------------------------------------------------------------------------------------------------------------------------------------------------------------------------------------------------------------------------------------------------------------------------------------------------------------------------------------------------------------------------------------------------------------------------------------------------------------------------------------------------------------------------------------------------------------------------------------------------------------------------------------------------------------------------------------------------------------------------------------------------------------------------------------------------------------------------------------------------------------------------------------------------------------------------------------------------------------------------------------------------------------------------------------------------------------------------------------------------------------------------------------------------------------------------------------------------------------------------------------------------------------------------------------------------------------------------------------------------------------------------------------------------------------------------------------------------------------------------------------------------------------------------------------------------------------------------------------------------------------------------------------------------------------------------------------------------------------------------------------------------------------------------------------------------------------------------------------------------------------------------------------------------------------------------------------------------------------------------------------------------------------------------------------------------------------------------------------------------------------------------------------------------------------------------------------------------------------------------------------------------------------------------------------------------------------------------------------------------------------------------------------------------------------------------------------------------------------------------------------------------------------------------------------------------------------------------------------------------------------------------------------------------------------------------------------------------------------------------------------------------------------------------------------------------------------------------------------------------------------------------------------------------------------------------------------------------------------------------------------------------------------------------------------------------------------------------------------------------------------------------------------------------------------------------------------------------------------------------------------------------------------------------------------------------------------------------------------------------------------------------------------------------------------------------------------------------------------------------------------------------------------------------------------------------------------------------------------------------------------------------------------------------------------------------------------------------------------------------------------------------------------------------------------------------------------------------------------------------------------------------------------------------------------------------------------------------------------------------------------------------------------------------------------------------------------------------------------------------------------------------------------------------------------------------------------------------------------------------------------------------------------------------------------------------------------------------------------------------------------------------------------------------------------------------------------------------------------------------------------------------------------------------------------------------------------------------------------------------------------------------------------------------------------------------------------------------------------------------------------------------------------------------------------------------------------------------------------------------------------------------------------------------------------------------------------------------------------------------------------------------------------------------------------------------------------------------------------------------------------------------------------------------------------------------------------------------------------------------------------------------------------------------------------------------------------------------------------------------------------------------------------------------------------------------------------------------------------------------------------------------------------------------------------------------------------------------------------------------------------------------------------------------------------------------------------------------------------------------------------------------------------------------------------------|

|        |                                                                                                                                                                                                                                                                                                                                                                                                                                                                                                                                                                                                                                                                                                                                                                                                                                                                                                                                                                                                                                                                                                                                                                                                                                                                                                                                                                                                                                                                                                                                                                                                                                                                                                                                                                                                                                                                                                                                                                                                                                                                                                                                                                                                                                                                                                                                                                                                                                                                                                                                                                                                                                                                                                                                                                                                                                                                                                                                                                                                                                                                                                                                                                                                                                                                                              |                  |
|--------|----------------------------------------------------------------------------------------------------------------------------------------------------------------------------------------------------------------------------------------------------------------------------------------------------------------------------------------------------------------------------------------------------------------------------------------------------------------------------------------------------------------------------------------------------------------------------------------------------------------------------------------------------------------------------------------------------------------------------------------------------------------------------------------------------------------------------------------------------------------------------------------------------------------------------------------------------------------------------------------------------------------------------------------------------------------------------------------------------------------------------------------------------------------------------------------------------------------------------------------------------------------------------------------------------------------------------------------------------------------------------------------------------------------------------------------------------------------------------------------------------------------------------------------------------------------------------------------------------------------------------------------------------------------------------------------------------------------------------------------------------------------------------------------------------------------------------------------------------------------------------------------------------------------------------------------------------------------------------------------------------------------------------------------------------------------------------------------------------------------------------------------------------------------------------------------------------------------------------------------------------------------------------------------------------------------------------------------------------------------------------------------------------------------------------------------------------------------------------------------------------------------------------------------------------------------------------------------------------------------------------------------------------------------------------------------------------------------------------------------------------------------------------------------------------------------------------------------------------------------------------------------------------------------------------------------------------------------------------------------------------------------------------------------------------------------------------------------------------------------------------------------------------------------------------------------------------------------------------------------------------------------------------------------------|------------------|
|        | <p>OR "Grenada" OR "Guadeloupe" OR "Haiti" OR "Jamaica" OR "Martinique" OR "Antilles" OR "Anguilla" OR "Saint Kitts" OR "St Kitts" OR "Saint Lucia" OR "St Lucia" OR "Saint Vincent" OR "St Vincent" OR "Trinidad" OR "Tobago" OR "Virgin Islands" OR "Kazakhstan" OR "Kyrgyzstan" OR "Tajikistan" OR "Turkmenistan" OR "Uzbekistan" OR "Borneo" OR "Brunei" OR "Cambodia" OR "East Timor" OR "Indonesia" OR "Laos" OR "Malaysia" OR "Mekong Valley" OR "Myanmar" OR "Burma" OR "Philippines" OR "Singapore" OR "Thailand" OR "Vietnam" OR "Bangladesh" OR "Bhutan" OR "India" OR "Nepal" OR "Pakistan" OR "Sri Lanka" OR "China" OR "Korea" OR "Macao" OR "Macau" OR "Mongolia" OR "Taiwan" OR "Afghanistan" OR "Bahrain" OR "Iran" OR "Iraq" OR "Israel" OR "Jordan" OR "Kuwait" OR "Lebanon" OR "Oman" OR "Qatar" OR "Saudi Arabia" OR "Syria" OR "Turkey" OR "United Arab Emirates" OR "Yemen" OR "Fiji" OR "New Caledonia" OR "Papua New Guinea" OR "Vanuatu" OR "Micronesia" OR "Melanesia" OR "Guam" OR "Palau" OR "Polynesia" OR "Samoa" OR "Tonga" OR "Armenia" OR "Azerbaijan" OR "Georgia" OR "Albania" OR "Estonia" OR "Latvia" OR "Lithuania" OR "Bosnia" OR "Herzegovina" OR "Serbia" OR "Bulgaria" OR "Belarus" OR "Croatia" OR "Czech Republic" OR "Hungary" OR "Macedonia" OR "Moldova" OR "Montenegro" OR "Poland" OR "Romania" OR "Russia" OR "Bashkiria" OR "Dagestan" OR "Slovakia" OR "Slovenia" OR "Ukraine" OR "Cameroon" OR "Central African Republic" OR "Chad" OR "Congo" OR "Equatorial Guinea" OR "Gabon" OR "Burundi" OR "Djibouti" OR "Eritrea" OR "Ethiopia" OR "Kenya" OR "Rwanda" OR "Somalia" OR "Sudan" OR "Tanzania" OR "Uganda" OR "Angola" OR "Botswana" OR "Lesotho" OR "Malawi" OR "Mozambique" OR "Namibia" OR "South Africa" OR "Swaziland" OR "Zambia" OR "Zimbabwe" OR "Benin" OR "Burkina Faso" OR "Cote d'Ivoire" OR "Gambia" OR "Ghana" OR "Guinea" OR "Guinea-Bissau" OR "Liberia" OR "Mali" OR "Mauritania" OR "Niger" OR "Nigeria" OR "Senegal" OR "Sierra Leone" OR "Togo" OR "Algeria" OR "Egypt" OR "Libya" OR "Morocco" OR "Tunisia" OR "Comoros" OR "Madagascar" OR "Mauritius" OR "Reunion" OR "Seychelles" OR "Cabo Verde" OR "Kiribati" OR "Marshall Islands" OR "Nauru" OR "Niue" OR "Sao Tome" OR "Solomon Island" OR "South Sudan" OR "Developing Countries" OR "Developing" OR "Least Developed" OR "Less-Developed" OR "Less Developed" OR "Under-Developed" OR "Under Developed" OR "Under Developed" OR "third-world" OR "third world" OR "Africa" OR "Africa" OR "Caribbean Region" OR "Caribbean Region" OR "West Indies" OR "Pacific Islands" OR "Pacific Islands" OR "Micronesia" OR "Melanesia" OR "Polynesia" OR "Mexico" OR "Mexico" OR "Latin America" OR "Latin America" OR "South America" OR "South America" OR "Indian Ocean Islands" OR "Indian Ocean Islands" OR "Pemba" OR "Cocos" OR "Maldives" OR "Central America" OR "Central America" OR "Asia" OR "Asia" OR "far east" OR "eastern europe" OR "eastern europe" OR "province" OR "provinces" OR "district" OR "districts" OR "prefecture" OR "prefectures" OR "county" OR "counties" OR "municipality" OR "municipalities"))</p> <p>AND<br/>(db:("LILACS" OR "IMSEAR" OR "WPRIM" OR "IMEMR" OR "WHOLIS" OR "AIM"))</p> <p>AND<br/>(instance:"ghl")</p> |                  |
| Embase | <p>((("child"/exp OR 'minor (person)'/exp OR 'infant':ab,ti OR 'infants':ab,ti OR 'neonate':ab,ti OR 'neonates':ab,ti OR 'neonatal':ab,ti OR 'newborn':ab,ti OR 'newborns':ab,ti OR 'new-born':ab,ti OR 'new-borns':ab,ti OR 'baby':ab,ti OR 'babies':ab,ti OR 'premature':ab,ti OR 'preterm':ab,ti OR 'pre term':ab,ti OR 'child':ab,ti OR 'children':ab,ti OR 'youth':ab,ti OR 'youths':ab,ti OR 'young people':ab,ti OR 'childhood':ab,ti OR 'toddler':ab,ti OR 'toddlers':ab,ti OR 'kid':ab,ti OR 'kids':ab,ti OR 'young patient':ab,ti OR 'young patients':ab,ti OR 'boy':ab,ti OR 'boys':ab,ti OR 'girl':ab,ti OR 'girls':ab,ti OR 'young age':ab,ti OR 'pediatric':ab,ti OR 'pre-schooler':ab,ti OR 'preschooler':ab,ti OR 'under 5':ab,ti OR 'under five':ab,ti OR 'under fives':ab,ti OR 'less than five':ab,ti OR 'perinatal':ab,ti))</p> <p>AND<br/>(('mortality'/exp OR 'death'/exp OR 'mortality':ab,ti OR 'death':ab,ti OR 'deaths':ab,ti OR 'mortalities':ab,ti OR 'case fatality':ab,ti OR 'fatal':ab,ti OR 'fatalities':ab,ti OR 'fatality':ab,ti))</p> <p>AND<br/>(('diarrhea'/exp OR 'dysentery'/exp OR 'cholera'/exp OR 'gastroenteritis'/exp OR 'diarrhea':ab,ti OR 'diarrheas':ab,ti OR 'diarrheal':ab,ti OR 'diarrhoeal':ab,ti OR 'diarrhoea':ab,ti OR 'diarrhoeas':ab,ti OR 'dysentery':ab,ti OR 'dysentery':ab,ti OR 'enteritis':ab,ti OR 'enteritides':ab,ti OR 'cholera':ab,ti OR 'choleras':ab,ti OR 'vibrio cholerae':ab,ti OR 'gastroenteritis':ab,ti OR 'gastroenteritides':ab,ti OR 'gastro enteritis':ab,ti OR 'gastro duodenitis':ab,ti OR 'gastrointestinal acute infection':ab,ti OR 'gastrointestinal acute infections':ab,ti OR 'gastrointestinal infection':ab,ti OR 'gastrointestinal infections':ab,ti OR 'digestive tract infection':ab,ti OR 'digestive tract infections':ab,ti OR 'digestive infection':ab,ti OR 'gastrointestinal tract infection':ab,ti OR 'gastrointestinal tract infections':ab,ti OR 'pneumonia'/exp OR 'respiratory tract infection'/exp OR 'bronchitis'/exp OR 'croup'/exp OR 'pneumonia':ab,ti OR 'pneumonias':ab,ti OR 'pulmonary inflammations':ab,ti OR 'lung inflammation':ab,ti OR 'lung inflammations':ab,ti OR 'inflammatory lung disease':ab,ti OR 'lobitis':ab,ti OR 'peripneumonia':ab,ti OR 'pleuropneumonia':ab,ti OR 'pleuropneumonitis':ab,ti OR 'pneumonitis':ab,ti OR 'pulmonal inflammation':ab,ti OR 'pulmonary inflammation':ab,ti OR 'pulmonic inflammation':ab,ti OR 'bronchopneumonia':ab,ti OR 'bronchopneumonias':ab,ti OR 'respiratory tract infections':ab,ti OR 'respiratory tract infection':ab,ti OR 'respiratory infection':ab,ti OR 'respiratory infections':ab,ti OR 'whooping cough':ab,ti OR 'pertussis':ab,ti OR 'pulmonary tract infection':ab,ti OR 'respiration infection':ab,ti OR 'bronchiolitis':ab,ti OR 'bronchitis':ab,ti OR 'bronchopulmonary infection':ab,ti OR 'croup':ab,ti OR 'diphtheria':ab,ti OR 'laryngitis':ab,ti OR 'severe acute respiratory syndrome':ab,ti OR 'sars':ab,ti OR 'acute chest syndrome':ab,ti OR 'acute chest</p>                                                                                                                                                                                                                                | January 12, 2018 |

|                                                                                                                                                                                                                                                                                                                                                                                                                                                                                                                                                                                                                                                                                                                                                                                                                                                                                                                                                                                                                                                                                                                                                                                                                                                                                                                                                                                                                                                                                                                                                                                                                                                                                                                                                                                                                                                                                                                                                                                                                                                                                                                                                                                                                                                                                                                                                                                                                                                                                                                                                                                                                                                                                                                                                                                                                                                                                                                                                                                                                                                                                                                                                                                                                                                                                                                                                                                                                                                                                                                                                                                                                                                                                                                                                                                                                                                                                                                                                                                                                                                                                                                                                                                                                                                                                                                                                                                                                                                                                                                                                                                                                                                                                                                                                                                                                                                                                                                                                                                                                                                                                                                                                                                                                                                                                                                                                                                                                                                                                                                                                                                                                                                                                                                                                                                                                                                                                                                                                                                                                                                                                                                                                                                                                                                                                                                                                                                                                                                                                                                                                                                                                                                                                                                                                                                                                                                                                                                                                                                                                                                                                                                                                                                                                                                                                                                                                                                                                                                                                                                                                                                                                                                                                       |  |
|---------------------------------------------------------------------------------------------------------------------------------------------------------------------------------------------------------------------------------------------------------------------------------------------------------------------------------------------------------------------------------------------------------------------------------------------------------------------------------------------------------------------------------------------------------------------------------------------------------------------------------------------------------------------------------------------------------------------------------------------------------------------------------------------------------------------------------------------------------------------------------------------------------------------------------------------------------------------------------------------------------------------------------------------------------------------------------------------------------------------------------------------------------------------------------------------------------------------------------------------------------------------------------------------------------------------------------------------------------------------------------------------------------------------------------------------------------------------------------------------------------------------------------------------------------------------------------------------------------------------------------------------------------------------------------------------------------------------------------------------------------------------------------------------------------------------------------------------------------------------------------------------------------------------------------------------------------------------------------------------------------------------------------------------------------------------------------------------------------------------------------------------------------------------------------------------------------------------------------------------------------------------------------------------------------------------------------------------------------------------------------------------------------------------------------------------------------------------------------------------------------------------------------------------------------------------------------------------------------------------------------------------------------------------------------------------------------------------------------------------------------------------------------------------------------------------------------------------------------------------------------------------------------------------------------------------------------------------------------------------------------------------------------------------------------------------------------------------------------------------------------------------------------------------------------------------------------------------------------------------------------------------------------------------------------------------------------------------------------------------------------------------------------------------------------------------------------------------------------------------------------------------------------------------------------------------------------------------------------------------------------------------------------------------------------------------------------------------------------------------------------------------------------------------------------------------------------------------------------------------------------------------------------------------------------------------------------------------------------------------------------------------------------------------------------------------------------------------------------------------------------------------------------------------------------------------------------------------------------------------------------------------------------------------------------------------------------------------------------------------------------------------------------------------------------------------------------------------------------------------------------------------------------------------------------------------------------------------------------------------------------------------------------------------------------------------------------------------------------------------------------------------------------------------------------------------------------------------------------------------------------------------------------------------------------------------------------------------------------------------------------------------------------------------------------------------------------------------------------------------------------------------------------------------------------------------------------------------------------------------------------------------------------------------------------------------------------------------------------------------------------------------------------------------------------------------------------------------------------------------------------------------------------------------------------------------------------------------------------------------------------------------------------------------------------------------------------------------------------------------------------------------------------------------------------------------------------------------------------------------------------------------------------------------------------------------------------------------------------------------------------------------------------------------------------------------------------------------------------------------------------------------------------------------------------------------------------------------------------------------------------------------------------------------------------------------------------------------------------------------------------------------------------------------------------------------------------------------------------------------------------------------------------------------------------------------------------------------------------------------------------------------------------------------------------------------------------------------------------------------------------------------------------------------------------------------------------------------------------------------------------------------------------------------------------------------------------------------------------------------------------------------------------------------------------------------------------------------------------------------------------------------------------------------------------------------------------------------------------------------------------------------------------------------------------------------------------------------------------------------------------------------------------------------------------------------------------------------------------------------------------------------------------------------------------------------------------------------------------------------------------------------------------------------------------------|--|
| <p>syndromes':ab,ti OR 'acute lower respiratory infection':ab,ti OR 'acute lower respiratory infections':ab,ti OR 'alrli':ab,ti OR 'lri':ab,ti OR 'ari':ab,ti OR 'respiration tract infection':ab,ti OR 'respiration tract infections':ab,ti OR 'legionnaire disease':ab,ti OR 'legionnaires disease':ab,ti OR 'pontiac fever':ab,ti OR 'lung infiltrate':ab,ti OR 'lung infiltration':ab,ti OR 'pulmonary infiltrate':ab,ti OR 'pulmonary infiltration':ab,ti OR 'pneumonic lung':ab,ti OR 'rds':ab,ti OR 'respiratory distress':ab,ti OR 'respiration distress':ab,ti OR 'malaria'/exp OR 'plasmodium falciparum'/exp OR 'plasmodium vivax'/exp OR 'plasmodium malariae'/exp OR 'plasmodium ovale'/exp OR 'malaria':ab,ti OR 'malarias':ab,ti OR 'plasmodium falciparum':ab,ti OR 'plasmodium falciparums':ab,ti OR 'plasmodium vivax':ab,ti OR 'plasmodium vivaxs':ab,ti OR 'plasmodium vivax malaria':ab,ti OR 'p. falciparum infection':ab,ti OR 'p. falciparum malaria':ab,ti OR 'pernicious malaria':ab,ti OR 'plasmodium falciparum infection':ab,ti OR 'plasmodium falciparum malaria vivax':ab,ti OR 'p. vivax infection':ab,ti OR 'p. vivax malaria':ab,ti OR 'vivax infection':ab,ti OR 'vivax malaria':ab,ti OR 'blackwater fever':ab,ti OR 'blackwater fevers':ab,ti OR 'black water fever':ab,ti OR 'black water fevers':ab,ti OR 'remittent fever':ab,ti OR 'paludism':ab,ti OR 'plasmodium infection':ab,ti OR 'plasmodium infections':ab,ti OR 'marsh fever':ab,ti OR 'falciparum infection':ab,ti OR 'plasmodium ovale':ab,ti OR 'plasmodium ovaes':ab,ti OR 'plasmodium malariae':ab,ti OR 'meningitis'/exp OR 'neisseria meningitidis'/exp OR 'meningococemia'/exp OR 'encephalitis'/exp OR 'sepsis'/exp OR 'meningococcosis'/exp OR 'meningitis':ab,ti OR 'meningitides':ab,ti OR 'pachymeningitis':ab,ti OR 'pachymeningitides':ab,ti OR 'arachnoiditis':ab,ti OR 'arachnoiditides':ab,ti OR 'arachnoid membrane inflammation':ab,ti OR 'arachnoid membrane inflammations':ab,ti OR 'meningocephalitis':ab,ti OR 'encephalomeningitis':ab,ti OR 'encephalomeningitides':ab,ti OR 'haemophilus influenzae':ab,ti OR 'haemophilus parainfluenzae':ab,ti OR 'cerebromeningitides':ab,ti OR 'cerebritis':ab,ti OR 'cerebritides':ab,ti OR 'waterhouse friderichsen syndrome':ab,ti OR 'waterhouse friederichsen syndrome':ab,ti OR 'waterhouse-friderichsen syndrome':ab,ti OR 'waterhouse-friederichsen syndrome':ab,ti OR 'purpura fulminans':ab,ti OR 'meningococcal':ab,ti OR 'meningeal':ab,ti OR 'cerebral cryptococcosis':ab,ti OR 'cerebral cryptococcoses':ab,ti OR 'toruloma':ab,ti OR 'torulomas':ab,ti OR 'lymphocytic choriomeningitis':ab,ti OR 'armstrong syndrome':ab,ti OR 'neisseria meningitidis':ab,ti OR 'neisseria meningitides':ab,ti OR 'encephalitis':ab,ti OR 'encephalitis':ab,ti OR 'encephalitis':ab,ti OR 'epidemic meningitis':ab,ti OR 'n. meningitidis':ab,ti OR 'bacterial meningitis':ab,ti OR 'meningitis, meningococcal':ab,ti OR 'meningococcal infections':ab,ti OR 'meningitis, pneumococcal':ab,ti OR 'brain inflammation':ab,ti OR 'brain inflammations':ab,ti OR 'rasmussen syndrome':ab,ti OR 'cerebral ventriculitis':ab,ti OR 'cerebral ventriculitides':ab,ti OR 'infectious ventriculitis':ab,ti OR 'infectious ventriculitides':ab,ti OR 'encephalomyelitis':ab,ti OR 'meningoencephalitis':ab,ti OR 'meningoencephalitides':ab,ti OR 'cerebromeningitis':ab,ti OR 'myeloencephalitis':ab,ti OR 'lupus vasculitis':ab,ti OR 'central nervous system lupus':ab,ti OR 'lupus erythematosus':ab,ti OR 'lupus erythematosus':ab,ti OR 'brain vasculitis':ab,ti OR 'brain angitis':ab,ti OR 'brain arteritis':ab,ti OR 'cerebral arteritis':ab,ti OR 'cerebral vasculitis':ab,ti OR 'micrococcus intracellularis':ab,ti OR 'neisseria weichselbaumi':ab,ti OR 'meningococcus':ab,ti OR 'meningococcemia':ab,ti OR 'meningococci':ab,ti OR 'meningococcal':ab,ti OR 'meningococcaemia':ab,ti OR 'sepsis':ab,ti OR 'pyemia':ab,ti OR 'pyemias':ab,ti OR 'pyohemia':ab,ti OR 'pyohemias':ab,ti OR 'pyaemia':ab,ti OR 'pyaemias':ab,ti OR 'septicemia':ab,ti OR 'septicemias':ab,ti OR 'blood poisoning':ab,ti OR 'blood poisonings':ab,ti OR 'septic':ab,ti OR 'sepsis':ab,ti OR 'congenital disorder'/exp OR 'neural tube defect'/exp OR 'sudden infant death syndrome'/exp OR 'fetal alcohol syndrome'/exp OR 'congenital':ab,ti OR 'deformities':ab,ti OR 'deformity':ab,ti OR 'birth defects':ab,ti OR 'birth defect':ab,ti OR 'abnormality':ab,ti OR 'abnormalities':ab,ti OR 'malformation':ab,ti OR 'malformations':ab,ti OR 'malformative':ab,ti OR 'malformed':ab,ti OR 'neural tube':ab,ti OR 'craniorachischisis':ab,ti OR 'craniorachischises':ab,ti OR 'diastematomyelia':ab,ti OR 'diastematomyelias':ab,ti OR 'tethered cord':ab,ti OR 'spinal dysraphism':ab,ti OR 'tethered spinal cord':ab,ti OR 'spinal dysraphisms':ab,ti OR 'iniencephaly':ab,ti OR 'iniencephalies':ab,ti OR 'neuroenteric':ab,ti OR 'neuroenteric':ab,ti OR 'spinal cord myelodysplasia':ab,ti OR 'spinal cord myelodysplasias':ab,ti OR 'acrania':ab,ti OR 'acranias':ab,ti OR 'exencephaly':ab,ti OR 'exencephalies':ab,ti OR 'dysgraphia':ab,ti OR 'dysgraphic':ab,ti OR 'dysraphism':ab,ti OR 'dysraphy':ab,ti OR 'ntd':ab,ti OR 'ntds':ab,ti OR 'sudden infant death':ab,ti OR 'sid':ab,ti OR 'sids':ab,ti OR 'cot death':ab,ti OR 'cot deaths':ab,ti OR 'crib death':ab,ti OR 'fetal alcohol spectrum':ab,ti OR 'foetal alcohol spectrum':ab,ti OR 'fasd':ab,ti OR 'fasds':ab,ti OR 'alcohol-related birth defects':ab,ti OR 'alcohol related birth defects':ab,ti OR 'alcohol related neurodevelopmental disorder':ab,ti OR 'fae':ab,ti OR 'fetal alcohol effects':ab,ti OR 'faes':ab,ti OR 'fetal alcohol syndrome':ab,ti OR 'fetus alcohol syndrome':ab,ti OR 'foetal alcohol syndrome':ab,ti OR 'immature and premature labor'/exp OR 'premature':ab,ti OR 'preterm':ab,ti OR 'pre-mature':ab,ti OR 'pre-term':ab,ti OR 'prematurity':ab,ti OR 'prematuritas':ab,ti OR 'asphyxia'/exp OR 'newborn hypoxia'/exp OR 'suffocation'/exp OR 'anoxia'/exp OR 'asphyxia neonatorum':ab,ti OR 'hypoxia':ab,ti OR 'asphyxia':ab,ti OR 'asphyxias':ab,ti OR 'suffocation':ab,ti OR 'suffocations':ab,ti OR 'anoxia':ab,ti OR ('intrapartum':ab,ti AND 'related':ab,ti) OR 'tetanus'/exp OR 'tetanus':ab,ti OR 'tetani':ab,ti OR 'diphtheria-tetanus-pertussis':ab,ti OR 'rubella'/exp OR 'necrosis'/exp OR 'birth injuries'/exp OR 'bleeding'/exp OR 'jaundice'/exp OR 'rubella':ab,ti OR 'measles':ab,ti OR 'epidemic roseola':ab,ti OR 'necrosis':ab,ti OR 'necrotic':ab,ti OR 'necroses':ab,ti OR 'necrotizing':ab,ti OR 'infarction':ab,ti OR 'infractions':ab,ti OR 'birth injuries':ab,ti OR 'birth injury':ab,ti OR 'birth trauma':ab,ti OR 'obstetric paralyses':ab,ti OR 'obstetric paralysis':ab,ti OR 'obstetrical paralyses':ab,ti OR 'obstetrical paralysis':ab,ti OR 'birth damage':ab,ti OR 'birth lesion':ab,ti OR 'birth palsy':ab,ti OR 'birth paralysis':ab,ti OR 'obstetric palsy':ab,ti OR 'obstetrical palsy':ab,ti OR 'brachial palsy':ab,ti OR 'brachial paralysis':ab,ti OR 'brachial plexus paralysis':ab,ti OR 'delivery trauma':ab,ti OR 'arm paralysis':ab,ti OR 'paralysis brachialis':ab,ti OR 'jaundice':ab,ti OR 'jaundices':ab,ti OR 'icterus':ab,ti OR 'bronze baby syndrome':ab,ti OR 'erythroleukoblastosis':ab,ti OR 'hemorrhage':ab,ti OR 'haemorrhage':ab,ti OR 'haemorrhagic':ab,ti OR 'hemorrhagic':ab,ti OR 'nutritional disorder'/exp OR 'starvation'/exp OR 'hunger'/exp) AND ('malnutrition':ab,ti OR 'nutritional':ab,ti OR 'undernutrition':ab,ti OR 'malnourishment':ab,ti OR</p> |  |
|---------------------------------------------------------------------------------------------------------------------------------------------------------------------------------------------------------------------------------------------------------------------------------------------------------------------------------------------------------------------------------------------------------------------------------------------------------------------------------------------------------------------------------------------------------------------------------------------------------------------------------------------------------------------------------------------------------------------------------------------------------------------------------------------------------------------------------------------------------------------------------------------------------------------------------------------------------------------------------------------------------------------------------------------------------------------------------------------------------------------------------------------------------------------------------------------------------------------------------------------------------------------------------------------------------------------------------------------------------------------------------------------------------------------------------------------------------------------------------------------------------------------------------------------------------------------------------------------------------------------------------------------------------------------------------------------------------------------------------------------------------------------------------------------------------------------------------------------------------------------------------------------------------------------------------------------------------------------------------------------------------------------------------------------------------------------------------------------------------------------------------------------------------------------------------------------------------------------------------------------------------------------------------------------------------------------------------------------------------------------------------------------------------------------------------------------------------------------------------------------------------------------------------------------------------------------------------------------------------------------------------------------------------------------------------------------------------------------------------------------------------------------------------------------------------------------------------------------------------------------------------------------------------------------------------------------------------------------------------------------------------------------------------------------------------------------------------------------------------------------------------------------------------------------------------------------------------------------------------------------------------------------------------------------------------------------------------------------------------------------------------------------------------------------------------------------------------------------------------------------------------------------------------------------------------------------------------------------------------------------------------------------------------------------------------------------------------------------------------------------------------------------------------------------------------------------------------------------------------------------------------------------------------------------------------------------------------------------------------------------------------------------------------------------------------------------------------------------------------------------------------------------------------------------------------------------------------------------------------------------------------------------------------------------------------------------------------------------------------------------------------------------------------------------------------------------------------------------------------------------------------------------------------------------------------------------------------------------------------------------------------------------------------------------------------------------------------------------------------------------------------------------------------------------------------------------------------------------------------------------------------------------------------------------------------------------------------------------------------------------------------------------------------------------------------------------------------------------------------------------------------------------------------------------------------------------------------------------------------------------------------------------------------------------------------------------------------------------------------------------------------------------------------------------------------------------------------------------------------------------------------------------------------------------------------------------------------------------------------------------------------------------------------------------------------------------------------------------------------------------------------------------------------------------------------------------------------------------------------------------------------------------------------------------------------------------------------------------------------------------------------------------------------------------------------------------------------------------------------------------------------------------------------------------------------------------------------------------------------------------------------------------------------------------------------------------------------------------------------------------------------------------------------------------------------------------------------------------------------------------------------------------------------------------------------------------------------------------------------------------------------------------------------------------------------------------------------------------------------------------------------------------------------------------------------------------------------------------------------------------------------------------------------------------------------------------------------------------------------------------------------------------------------------------------------------------------------------------------------------------------------------------------------------------------------------------------------------------------------------------------------------------------------------------------------------------------------------------------------------------------------------------------------------------------------------------------------------------------------------------------------------------------------------------------------------------------------------------------------------------------------------------------------------------------------------|--|



|                    |                                                                                                                                                                                                                                                                                                                                                                                                                                                                                                                                                                                                                                                                                                                                                                                                                                                                                                                                                                                                                                                                                                                                                                                                                                                                                                                                                                                                                                                                                                                                                                                                                                                                                                                                                                                                                                                                                                                                                                                                                                                                                                                                                                                                                                                                                                                                                                                                                                                                                                                                                                                                                                                                                                                                                                                                                                                                                                                                                                                                                                                                                                                                                                                                                                                                                                                                                                                                                                                                                                                                                                                                                                                                                                                                                                                                                                                                                                                                                                                                                                                                                                                                                                                                                                                                                                                                                                                                                                                                                                                                                                                                                                                                                                                                                                                                                                                                                                                                                                                                                                                                                                                                                                                                                                                                                                                                                                                                                                                                                                                                                                                                                                                                                                                                                                                                                                                                                               |                  |
|--------------------|-----------------------------------------------------------------------------------------------------------------------------------------------------------------------------------------------------------------------------------------------------------------------------------------------------------------------------------------------------------------------------------------------------------------------------------------------------------------------------------------------------------------------------------------------------------------------------------------------------------------------------------------------------------------------------------------------------------------------------------------------------------------------------------------------------------------------------------------------------------------------------------------------------------------------------------------------------------------------------------------------------------------------------------------------------------------------------------------------------------------------------------------------------------------------------------------------------------------------------------------------------------------------------------------------------------------------------------------------------------------------------------------------------------------------------------------------------------------------------------------------------------------------------------------------------------------------------------------------------------------------------------------------------------------------------------------------------------------------------------------------------------------------------------------------------------------------------------------------------------------------------------------------------------------------------------------------------------------------------------------------------------------------------------------------------------------------------------------------------------------------------------------------------------------------------------------------------------------------------------------------------------------------------------------------------------------------------------------------------------------------------------------------------------------------------------------------------------------------------------------------------------------------------------------------------------------------------------------------------------------------------------------------------------------------------------------------------------------------------------------------------------------------------------------------------------------------------------------------------------------------------------------------------------------------------------------------------------------------------------------------------------------------------------------------------------------------------------------------------------------------------------------------------------------------------------------------------------------------------------------------------------------------------------------------------------------------------------------------------------------------------------------------------------------------------------------------------------------------------------------------------------------------------------------------------------------------------------------------------------------------------------------------------------------------------------------------------------------------------------------------------------------------------------------------------------------------------------------------------------------------------------------------------------------------------------------------------------------------------------------------------------------------------------------------------------------------------------------------------------------------------------------------------------------------------------------------------------------------------------------------------------------------------------------------------------------------------------------------------------------------------------------------------------------------------------------------------------------------------------------------------------------------------------------------------------------------------------------------------------------------------------------------------------------------------------------------------------------------------------------------------------------------------------------------------------------------------------------------------------------------------------------------------------------------------------------------------------------------------------------------------------------------------------------------------------------------------------------------------------------------------------------------------------------------------------------------------------------------------------------------------------------------------------------------------------------------------------------------------------------------------------------------------------------------------------------------------------------------------------------------------------------------------------------------------------------------------------------------------------------------------------------------------------------------------------------------------------------------------------------------------------------------------------------------------------------------------------------------------------------------------------------------|------------------|
|                    | <p>'malnourishments':ab,ti OR 'deficiency':ab,ti OR 'deficiencies':ab,ti OR 'refeeding syndrome':ab,ti OR 'starvation':ab,ti OR 'starvations':ab,ti OR 'famine':ab,ti OR 'famines':ab,ti OR 'deficient':ab,ti OR 'underfeeding':ab,ti OR 'undernourishment':ab,ti OR 'nutrition':ab,ti OR 'hypervitaminosis':ab,ti OR 'chronic disease'/exp OR 'communicable disease'/exp OR 'infection'/exp OR 'non-communicable disease'/exp OR 'infant disease'/exp OR 'noncommunicable':ab,ti OR 'non-communicable':ab,ti OR 'communicable':ab,ti OR 'non-infectious':ab,ti OR 'infectious':ab,ti OR 'noninfectious':ab,ti OR 'newborn':ab,ti OR 'neonatal':ab,ti OR 'perinatal':ab,ti))</p> <p>AND</p> <p>('argentina':ab,ti OR 'bolivia':ab,ti OR 'brazil':ab,ti OR 'brasil':ab,ti OR 'chile':ab,ti OR 'colombia':ab,ti OR 'ecuador':ab,ti OR 'french guiana':ab,ti OR 'guyana':ab,ti OR 'paraguay':ab,ti OR 'peru':ab,ti OR 'suriname':ab,ti OR 'uruguay':ab,ti OR 'venezuela':ab,ti OR 'belize':ab,ti OR 'costa rica':ab,ti OR 'el salvador':ab,ti OR 'guatemala':ab,ti OR 'honduras':ab,ti OR 'nicaragua':ab,ti OR 'puerto rico':ab,ti OR 'panama':ab,ti OR 'antigua':ab,ti OR 'barbuda':ab,ti OR 'bahamas':ab,ti OR 'barbados':ab,ti OR 'cuba':ab,ti OR 'dominica':ab,ti OR 'dominican republic':ab,ti OR 'grenada':ab,ti OR 'guadeloupe':ab,ti OR 'haiti':ab,ti OR 'jamaica':ab,ti OR 'martinique':ab,ti OR 'antilles':ab,ti OR 'anguilla':ab,ti OR 'saint kitts':ab,ti OR 'st kitts':ab,ti OR 'saint lucia':ab,ti OR 'st lucia':ab,ti OR 'saint vincent':ab,ti OR 'st vincent':ab,ti OR 'trinidad':ab,ti OR 'tobago':ab,ti OR 'virgin islands':ab,ti OR 'kazakhstan':ab,ti OR 'kyrgyzstan':ab,ti OR 'tajikistan':ab,ti OR 'turkmenistan':ab,ti OR 'uzbekistan':ab,ti OR 'borneo':ab,ti OR 'brunei':ab,ti OR 'cambodia':ab,ti OR 'east timor':ab,ti OR 'indonesia':ab,ti OR 'laos':ab,ti OR 'malaysia':ab,ti OR 'mekong valley':ab,ti OR 'myanmar':ab,ti OR 'burma':ab,ti OR 'philippines':ab,ti OR 'singapore':ab,ti OR 'thailand':ab,ti OR 'vietnam':ab,ti OR 'bangladesh':ab,ti OR 'bhutan':ab,ti OR 'india':ab,ti OR 'nepal':ab,ti OR 'pakistan':ab,ti OR 'sri lanka':ab,ti OR 'china':ab,ti OR 'korea':ab,ti OR 'macao':ab,ti OR 'macau':ab,ti OR 'mongolia':ab,ti OR 'taiwan':ab,ti OR 'afghanistan':ab,ti OR 'bahrain':ab,ti OR 'iran':ab,ti OR 'iraq':ab,ti OR 'israel':ab,ti OR 'jordan':ab,ti OR 'kuwait':ab,ti OR 'lebanon':ab,ti OR 'oman':ab,ti OR 'qatar':ab,ti OR 'saudi arabia':ab,ti OR 'syria':ab,ti OR 'turkey':ab,ti OR 'united arab emirates':ab,ti OR 'yemen':ab,ti OR 'fiji':ab,ti OR 'new caledonia':ab,ti OR 'papua new guinea':ab,ti OR 'vanuatu':ab,ti OR 'guam':ab,ti OR 'palau':ab,ti OR 'samoa':ab,ti OR 'tonga':ab,ti OR 'armenia':ab,ti OR 'azerbaijan':ab,ti OR 'georgia':ab,ti OR 'albania':ab,ti OR 'estonia':ab,ti OR 'latvia':ab,ti OR 'lithuania':ab,ti OR 'bosnia':ab,ti OR 'herzegovina':ab,ti OR 'serbia':ab,ti OR 'bulgaria':ab,ti OR 'belarus':ab,ti OR 'croatia':ab,ti OR 'czech republic':ab,ti OR 'hungary':ab,ti OR 'macedonia':ab,ti OR 'moldova':ab,ti OR 'montenegro':ab,ti OR 'poland':ab,ti OR 'romania':ab,ti OR 'russia':ab,ti OR 'bashkiria':ab,ti OR 'dagestan':ab,ti OR 'slovakia':ab,ti OR 'slovenia':ab,ti OR 'ukraine':ab,ti OR 'cameroon':ab,ti OR 'central african republic':ab,ti OR 'chad':ab,ti OR 'congo':ab,ti OR 'equatorial guinea':ab,ti OR 'gabon':ab,ti OR 'burundi':ab,ti OR 'djibouti':ab,ti OR 'eritrea':ab,ti OR 'ethiopia':ab,ti OR 'kenya':ab,ti OR 'rwanda':ab,ti OR 'somalia':ab,ti OR 'sudan':ab,ti OR 'tanzania':ab,ti OR 'uganda':ab,ti OR 'angola':ab,ti OR 'botswana':ab,ti OR 'lesotho':ab,ti OR 'malawi':ab,ti OR 'mozambique':ab,ti OR 'namibia':ab,ti OR 'south africa':ab,ti OR 'swaziland':ab,ti OR 'zambia':ab,ti OR 'zimbabwe':ab,ti OR 'benin':ab,ti OR 'burkina faso':ab,ti OR 'cote d'ivoire':ab,ti OR 'gambia':ab,ti OR 'ghana':ab,ti OR 'guinea':ab,ti OR 'guinea-bissau':ab,ti OR 'liberia':ab,ti OR 'mali':ab,ti OR 'mauritania':ab,ti OR 'niger':ab,ti OR 'nigeria':ab,ti OR 'senegal':ab,ti OR 'sierra leone':ab,ti OR 'togo':ab,ti OR 'algeria':ab,ti OR 'egypt':ab,ti OR 'libya':ab,ti OR 'morocco':ab,ti OR 'tunisia':ab,ti OR 'comoros':ab,ti OR 'madagascar':ab,ti OR 'mauritius':ab,ti OR 'reunion':ab,ti OR 'seychelles':ab,ti OR 'cabo verde':ab,ti OR 'kiribati':ab,ti OR 'marshall islands':ab,ti OR 'nauru':ab,ti OR 'niue':ab,ti OR 'sao tome and principe':ab,ti OR 'solomon islands':ab,ti OR 'south sudan':ab,ti OR 'developing country'/exp OR 'africa'/exp OR 'caribbean islands'/exp OR 'south and central america'/exp OR 'mexico'/exp OR 'asia'/exp OR 'pacific islands'/exp OR 'indian ocean'/exp OR 'eastern europe'/exp OR 'developing':ab,ti OR 'least developed':ab,ti OR 'less-developed':ab,ti OR 'less developed':ab,ti OR 'under-developed':ab,ti OR 'under developed':ab,ti OR 'underdeveloped':ab,ti OR 'third-world':ab,ti OR 'third world':ab,ti OR 'africa':ab,ti OR 'caribbean region':ab,ti OR 'west indies':ab,ti OR 'pacific islands':ab,ti OR 'micronesia':ab,ti OR 'melanesia':ab,ti OR 'polynesia':ab,ti OR 'mexico':ab,ti OR 'latin america':ab,ti OR 'south america':ab,ti OR 'indian ocean islands':ab,ti OR 'pemba':ab,ti OR 'cocos':ab,ti OR 'maldives':ab,ti OR 'central america':ab,ti OR 'asia':ab,ti OR 'far east':ab,ti OR 'eastern europe':ab,ti OR 'province':ab,ti OR 'provinces':ab,ti OR 'district':ab,ti OR 'districts':ab,ti OR 'prefecture':ab,ti OR 'prefectures':ab,ti OR 'county':ab,ti OR 'counties':ab,ti OR 'municipality':ab,ti OR 'municipalities':ab,ti)))</p> <p>NOT</p> <p>('nonhuman':de OR 'animal experiment':de) NOT ('human' AND ('nonhuman':de OR 'animal experiment':de)))</p> <p>NOT</p> <p>'editorial':it OR 'letter':it OR 'note':it OR 'case report':de OR 'practice guideline':de OR 'methodology':de)</p> |                  |
| Global Health Ovid | <p>1 exp children/ or exp infants/ or infant.mp. or infants.mp. or neonate.mp. or neonates.mp. or neonatal.mp. or newborn.mp. or newborns.mp. or new-born.mp. or new-borns.mp. or baby.mp. or babies.mp. or premature.mp. or preterm.mp. or pre term.mp. or child.mp. or children.mp. or youth.mp. or youths.mp. or young people.mp. or childhood.mp. or toddler.mp. or toddlers.mp. or kid.mp. or kids.mp. or young patient.mp. or young patients.mp. or boy.mp. or boys.mp. or girl.mp. or girls.mp. or young age.mp. or pediatric.mp. or pre-schooler.mp. or preschooler.mp. or under five.mp. or under fives.mp. or less than five.mp. or perinatal.mp. [mp=abstract, title, original title, broad terms, heading words, identifiers, cabicodes] (507817)</p> <p>2 (exp death/ and dying/) or exp mortality/ or mortality.mp. or mortalities.mp. or fatal.mp. or fatality.mp. or</p>                                                                                                                                                                                                                                                                                                                                                                                                                                                                                                                                                                                                                                                                                                                                                                                                                                                                                                                                                                                                                                                                                                                                                                                                                                                                                                                                                                                                                                                                                                                                                                                                                                                                                                                                                                                                                                                                                                                                                                                                                                                                                                                                                                                                                                                                                                                                                                                                                                                                                                                                                                                                                                                                                                                                                                                                                                                                                                                                                                                                                                                                                                                                                                                                                                                                                                                                                                                                                                                                                                                                                                                                                                                                                                                                                                                                                                                                                                                                                                                                                                                                                                                                                                                                                                                                                                                                                                                                                                                                                                                                                                                                                                                                                                                                                                                                                                                                                                                                                                                                      | January 12, 2018 |

|                                                                                                                                                                                                                                                                                                                                                                                                                                                                                                                                                                                                                                                                                                                                                                                                                                                                                                                                                                                                                                                                                                                                                                                                                                                                                                                                                                                                                                                                                                                                                                                                                                                                                                                                                                                                                                                                                                                                                                                                                                                                                                                                                                                                                                                                                                                                                                                                                                                                                                                                                                                                                                                                                                                                                                                                                                                                                                                                                                                                                                                                                                                                                                                                                                                                                                                                                                                                                                                                                                                                                                                                                                                                                                                                                                                                                                                                                                                                                                                                                                                                                                                                                                                                                                                                                                                                                                                                                                                                                                                                                                                                                                                                                                                                                                                                                                                                                                                                                                                                                                                                                                                                                                                                                                                                                                                                                                                                                                                                                                                                                                                                                                                                                                                                                                                                                                                                                                                                                                                                                                                                                                                                                                                                                               |  |
|-------------------------------------------------------------------------------------------------------------------------------------------------------------------------------------------------------------------------------------------------------------------------------------------------------------------------------------------------------------------------------------------------------------------------------------------------------------------------------------------------------------------------------------------------------------------------------------------------------------------------------------------------------------------------------------------------------------------------------------------------------------------------------------------------------------------------------------------------------------------------------------------------------------------------------------------------------------------------------------------------------------------------------------------------------------------------------------------------------------------------------------------------------------------------------------------------------------------------------------------------------------------------------------------------------------------------------------------------------------------------------------------------------------------------------------------------------------------------------------------------------------------------------------------------------------------------------------------------------------------------------------------------------------------------------------------------------------------------------------------------------------------------------------------------------------------------------------------------------------------------------------------------------------------------------------------------------------------------------------------------------------------------------------------------------------------------------------------------------------------------------------------------------------------------------------------------------------------------------------------------------------------------------------------------------------------------------------------------------------------------------------------------------------------------------------------------------------------------------------------------------------------------------------------------------------------------------------------------------------------------------------------------------------------------------------------------------------------------------------------------------------------------------------------------------------------------------------------------------------------------------------------------------------------------------------------------------------------------------------------------------------------------------------------------------------------------------------------------------------------------------------------------------------------------------------------------------------------------------------------------------------------------------------------------------------------------------------------------------------------------------------------------------------------------------------------------------------------------------------------------------------------------------------------------------------------------------------------------------------------------------------------------------------------------------------------------------------------------------------------------------------------------------------------------------------------------------------------------------------------------------------------------------------------------------------------------------------------------------------------------------------------------------------------------------------------------------------------------------------------------------------------------------------------------------------------------------------------------------------------------------------------------------------------------------------------------------------------------------------------------------------------------------------------------------------------------------------------------------------------------------------------------------------------------------------------------------------------------------------------------------------------------------------------------------------------------------------------------------------------------------------------------------------------------------------------------------------------------------------------------------------------------------------------------------------------------------------------------------------------------------------------------------------------------------------------------------------------------------------------------------------------------------------------------------------------------------------------------------------------------------------------------------------------------------------------------------------------------------------------------------------------------------------------------------------------------------------------------------------------------------------------------------------------------------------------------------------------------------------------------------------------------------------------------------------------------------------------------------------------------------------------------------------------------------------------------------------------------------------------------------------------------------------------------------------------------------------------------------------------------------------------------------------------------------------------------------------------------------------------------------------------------------------------------------------------------------------------------------|--|
| <p>fatalities.mp. or death.mp. or deaths.mp. [mp=abstract, title, original title, broad terms, heading words, identifiers, cabicodes] (283929)</p> <p>3 exp diarrhoea/ or exp dysentery/ or exp enterocolitis/ or exp gastroenteritis/ or exp cholera/ or Diarrhea.mp. or Diarrheas.mp. or Diarrheal.mp. or diarrhoeal.mp. or diarrhoea.mp. or diarrhoeas.mp. or dysentery.mp. or dysentery.mp. or enteritis.mp. or enteritides.mp. or Cholera.mp. or Choleras.mp. or vibrio Cholerae.mp. or gastroenteritis.mp. or gastroenteritides.mp. or gastro enteritis.mp. or gastroduodenitis.mp. or gastrointestinal acute infection.mp. or gastrointestinal acute infections.mp. or gastrointestinal infection.mp. or gastrointestinal infections.mp. or digestive tract infection.mp. or digestive tract infections.mp. or digestive infection.mp. or gastrointestinal tract infection.mp.</p> <p>or gastrointestinal tract infection.mp. or exp pneumonia/ or exp pneumonitis/ or exp lower respiratory tract infections/ or exp upper respiratory tract infections/ or exp pertussis/ or exp bronchiolitis/ or exp bronchitis/ or exp diphtheria/ or exp laryngitis/ or exp legionnaires' disease/ or exp acute respiratory distress syndrome/ or pneumonia.mp. or pneumonias.mp. or pneumonitis.mp. or pulmonary inflammation.mp. or pulmonary inflammations.mp. or lung inflammation.mp.</p> <p>or Lung Inflammations.mp. or inflammatory lung disease.mp. or lobitis.mp. or peripneumonia.mp. or pleuropneumonia.mp. or pleuropneumonitis.mp. or pneumonitis.mp. or pulmonal inflammation.mp. or pulmonary inflammation.mp. or pulmonic inflammation.mp. or bronchopneumonia.mp. or bronchopneumonias.mp. or Respiratory Tract Infections.mp. or Respiratory Tract Infection.mp. or Respiratory Infection.mp. or Respiratory Infections.mp. or whooping cough.mp. or pertussis.mp. or pulmonary tract infection.mp. or respiration infection.mp. or Bronchiolitis.mp. or bronchitis.mp. or bronchopulmonary infection.mp. or Croup.mp. or diphtheria.mp. or laryngitis.mp. or Severe Acute Respiratory Syndrome.mp. or SARS.mp. or acute chest syndrome.mp. or acute chest syndromes.mp. or Acute Lower Respiratory Infection.mp. or Acute Lower Respiratory Infections.mp. or ALRI.mp. or LRI.mp. or ARI.mp. or respiration tract infection.mp. or respiration tract infections.mp. or legionnaire disease.mp. or legionnaires disease.mp. or Pontiac fever.mp. or lung infiltrate.mp. or lung infiltration.mp. or pulmonary infiltrate.mp. or pulmonary infiltration.mp. or pneumonic lung.mp. or rds.mp. or respiratory distress.mp. or respiration distress.mp. or exp malaria/ or exp plasmodium falciparum/ or exp Plasmodium vivax/ or exp Plasmodium ovale/ or exp Plasmodium malariae/ or malaria.mp. or malaras.mp. or Plasmodium Infection.mp.</p> <p>or Plasmodium Infections.mp. or Plasmodium falciparum.mp. or Plasmodium falciparums.mp. or malaria, falciparum.mp. or blackwater fever.mp. or blackwater fevers.mp. or black water fever.mp. or black water fevers.mp. or remittent fever.mp.</p> <p>or paludism.mp. or plasmodium infection.mp. or plasmodium infections.mp. or marsh fever.mp. or falciparum infection.mp.</p> <p>or Plasmodium vivax.mp. or Plasmodium vivaxs.mp. or vivax malaria.mp. or vivax infection.mp. or Plasmodium ovale.mp. or Plasmodium ovals.mp. or ovale malaria.mp. or Plasmodium malariae.mp. or exp meningitis/ or exp meningococcal disease/ or exp encephalitis/ or exp Neisseria meningitidis/ or exp sepsis/ or Meningitis.mp. or Meningitides.mp. or Pachymeningitis.mp. or Pachymeningitides.mp. or Arachnoiditis.mp. or Arachnoiditides.mp. or Arachnoid Membrane inflammation.mp. or Arachnoid Membrane inflammations.mp. or Meningoencephalitis.mp. or Meningoencephalitis.mp. or Meningocephalitis.mp. or Cerebromeningitis.mp. or Encephalomeningitis.mp. or Encephalomeningitides.mp. or Haemophilus influenzae.mp. or Haemophilus parainfluenzae.mp. or Cerebromeningitides.mp. or Cerebritis.mp. or Cerebritides.mp. or Waterhouse Friderichsen Syndrome.mp. or Waterhouse Friederichsen Syndrome.mp. or Waterhouse-Friederichsen Syndrome.mp. or Purpura Fulminans.mp. or Meningococcal.mp. or Meningeal.mp. or Cerebral Cryptococcosis.mp. or Cerebral Cryptococcoses.mp. or Toruloma.mp. or Torulomas.mp. or Lymphocytic Choriomeningitis.mp.</p> <p>or Armstrong Syndrome.mp. or Armstrongs Syndrome.mp. or Encephalitis.mp. or Encephalitis.mp. or encephalitis.mp. or brain inflammation.mp. or brain inflammations.mp. or Rasmussen syndrome.mp. or Cerebral Ventriculitis.mp. or Cerebral Ventriculitides.mp. or Infectious Ventriculitis.mp. or Infectious Ventriculitides.mp. or Encephalomyelitis.mp. or Meningoencephalitis.mp. or Meningoencephalitis.mp. or Cerebromeningitis.mp. or myeloencephalitis.mp.</p> <p>or Lupus Vasculitis.mp. or Central Nervous System Lupus.mp. or Lupus Erythematosis.mp. or Lupus Erythematosis.mp. or brain vasculitis.mp. or brain angitis.mp. or brain arteritis.mp. or cerebral arteritis.mp. or cerebral vasculitis.mp. or Neisseria meningitidis.mp. or Neisseria meningitides.mp. or Micrococcus intracellularis.mp. or Neisseria weichselbaumi.mp. or Meningococcus.mp. or meningococemia.mp. or meningococci.mp. or meningococcal.mp. or meningococcaemia.mp. or sepsis.mp. or Pyemia.mp. or Pyemias.mp. or Pyohemia.mp. or Pyohemias.mp. or Pyaemia.mp. or Pyaemias.mp. or Septicemia.mp. or Septicemias.mp. or Blood Poisoning.mp. or Blood Poisonings.mp. or septic.mp. or sepsis.mp. or exp congenital abnormalities/ or exp sudden infant death syndrome/ or exp fetal alcohol syndrome/ or congenital.mp. or Deformities.mp. or Deformity.mp. or Birth Defects.mp. or Birth Defect.mp. or abnormality.mp. or abnormalities.mp. or malformation.mp. or malformations.mp. or malformative.mp. or malformed.mp. or neural tube.mp. or Craniorachischisis.mp. or Craniorachischises.mp. or Diastematomyelia.mp. or Diastematomyelias.mp. or Tethered Cord.mp.</p> <p>or Spinal Dysraphism.mp. or Tethered Spinal Cord.mp. or Spinal Dysraphisms.mp. or Iniencephaly.mp. or Iniencephalies.mp.</p> |  |
|-------------------------------------------------------------------------------------------------------------------------------------------------------------------------------------------------------------------------------------------------------------------------------------------------------------------------------------------------------------------------------------------------------------------------------------------------------------------------------------------------------------------------------------------------------------------------------------------------------------------------------------------------------------------------------------------------------------------------------------------------------------------------------------------------------------------------------------------------------------------------------------------------------------------------------------------------------------------------------------------------------------------------------------------------------------------------------------------------------------------------------------------------------------------------------------------------------------------------------------------------------------------------------------------------------------------------------------------------------------------------------------------------------------------------------------------------------------------------------------------------------------------------------------------------------------------------------------------------------------------------------------------------------------------------------------------------------------------------------------------------------------------------------------------------------------------------------------------------------------------------------------------------------------------------------------------------------------------------------------------------------------------------------------------------------------------------------------------------------------------------------------------------------------------------------------------------------------------------------------------------------------------------------------------------------------------------------------------------------------------------------------------------------------------------------------------------------------------------------------------------------------------------------------------------------------------------------------------------------------------------------------------------------------------------------------------------------------------------------------------------------------------------------------------------------------------------------------------------------------------------------------------------------------------------------------------------------------------------------------------------------------------------------------------------------------------------------------------------------------------------------------------------------------------------------------------------------------------------------------------------------------------------------------------------------------------------------------------------------------------------------------------------------------------------------------------------------------------------------------------------------------------------------------------------------------------------------------------------------------------------------------------------------------------------------------------------------------------------------------------------------------------------------------------------------------------------------------------------------------------------------------------------------------------------------------------------------------------------------------------------------------------------------------------------------------------------------------------------------------------------------------------------------------------------------------------------------------------------------------------------------------------------------------------------------------------------------------------------------------------------------------------------------------------------------------------------------------------------------------------------------------------------------------------------------------------------------------------------------------------------------------------------------------------------------------------------------------------------------------------------------------------------------------------------------------------------------------------------------------------------------------------------------------------------------------------------------------------------------------------------------------------------------------------------------------------------------------------------------------------------------------------------------------------------------------------------------------------------------------------------------------------------------------------------------------------------------------------------------------------------------------------------------------------------------------------------------------------------------------------------------------------------------------------------------------------------------------------------------------------------------------------------------------------------------------------------------------------------------------------------------------------------------------------------------------------------------------------------------------------------------------------------------------------------------------------------------------------------------------------------------------------------------------------------------------------------------------------------------------------------------------------------------------------------------------------------------------------------------|--|

|      |                                                                                                                                                                                                                                                                                                                                                                                                                                                                                                                                                                                                                                                                                                                                                                                                                                                                                                                                                                                                                                                                                                                                                                                                                                                                                                                                                                                                                                                                                                                                                                                                                                                                                                                                                                                                                                                                                                                                                                                                                                                                                                                                                                                                                                                                                                                                                                                                                                                                                                                                                                                                                                                                                                                                                                                                                                                                                                                                                                                                                                                                                                                                                                                                                                                                                                                                                                                                                                                                                                                                                                                                                                                                                                                                                                                                                                                                                                                                                                                                                                                                                                                                                                                                                                                                                                                                                                                                                                                                                                                                                                                                                                                                                                                                                                                                                                                                                                                                                                                                                                                                                                                                                                                                                                                                                                                                                                                                                                                                                                                                                                                                                                                                                                                                                                                                                                                                                                                                                                                                                                                                                                                                                                                                                                                                                                                                                                                                                                                                                                                                                                                                 |                  |
|------|-------------------------------------------------------------------------------------------------------------------------------------------------------------------------------------------------------------------------------------------------------------------------------------------------------------------------------------------------------------------------------------------------------------------------------------------------------------------------------------------------------------------------------------------------------------------------------------------------------------------------------------------------------------------------------------------------------------------------------------------------------------------------------------------------------------------------------------------------------------------------------------------------------------------------------------------------------------------------------------------------------------------------------------------------------------------------------------------------------------------------------------------------------------------------------------------------------------------------------------------------------------------------------------------------------------------------------------------------------------------------------------------------------------------------------------------------------------------------------------------------------------------------------------------------------------------------------------------------------------------------------------------------------------------------------------------------------------------------------------------------------------------------------------------------------------------------------------------------------------------------------------------------------------------------------------------------------------------------------------------------------------------------------------------------------------------------------------------------------------------------------------------------------------------------------------------------------------------------------------------------------------------------------------------------------------------------------------------------------------------------------------------------------------------------------------------------------------------------------------------------------------------------------------------------------------------------------------------------------------------------------------------------------------------------------------------------------------------------------------------------------------------------------------------------------------------------------------------------------------------------------------------------------------------------------------------------------------------------------------------------------------------------------------------------------------------------------------------------------------------------------------------------------------------------------------------------------------------------------------------------------------------------------------------------------------------------------------------------------------------------------------------------------------------------------------------------------------------------------------------------------------------------------------------------------------------------------------------------------------------------------------------------------------------------------------------------------------------------------------------------------------------------------------------------------------------------------------------------------------------------------------------------------------------------------------------------------------------------------------------------------------------------------------------------------------------------------------------------------------------------------------------------------------------------------------------------------------------------------------------------------------------------------------------------------------------------------------------------------------------------------------------------------------------------------------------------------------------------------------------------------------------------------------------------------------------------------------------------------------------------------------------------------------------------------------------------------------------------------------------------------------------------------------------------------------------------------------------------------------------------------------------------------------------------------------------------------------------------------------------------------------------------------------------------------------------------------------------------------------------------------------------------------------------------------------------------------------------------------------------------------------------------------------------------------------------------------------------------------------------------------------------------------------------------------------------------------------------------------------------------------------------------------------------------------------------------------------------------------------------------------------------------------------------------------------------------------------------------------------------------------------------------------------------------------------------------------------------------------------------------------------------------------------------------------------------------------------------------------------------------------------------------------------------------------------------------------------------------------------------------------------------------------------------------------------------------------------------------------------------------------------------------------------------------------------------------------------------------------------------------------------------------------------------------------------------------------------------------------------------------------------------------------------------------------------------------------------------------|------------------|
|      | <p>or Neurenteric.mp. or Neuroenteric.mp. or Spinal Cord Myelodysplasia.mp. or Spinal Cord Myelodysplasias.mp. or Acrania.mp. or Acranias.mp. or Exencephaly.mp. or Exencephalies.mp. or dysgraphia.mp. or dysraphic.mp. or dysraphism.mp.</p> <p>or dysraphy.mp. or NTD.mp. or NTDS.mp. or sudden infant death.mp. or sid.mp. or SIDS.mp. or cot death.mp. or cot deaths.mp. or crib death.mp. or Fetal alcohol spectrum.mp. or Foetal alcohol spectrum.mp. or FASD.mp. or FASDs.mp. or Fetal Alcohol Syndrome.mp. or Alcohol-Related Birth Defects.mp. or Alcohol Related Birth Defects.mp. or Alcohol Related Neurodevelopmental Disorder.mp. or FAE.mp. or Fetal Alcohol Effects.mp. or FAEs.mp. or Fetal Alcohol Syndrome.mp. or Fetus Alcohol Syndrome.mp. or Foetal alcohol syndrome.mp. or exp prematurity/ or exp premature infants/ or premature.mp.</p> <p>or preterm.mp. or pre-mature.mp. or pre-term.mp. or prematurity.mp. or prematuritas.mp. or exp asphyxia/ or asphyxia.mp.</p> <p>or Asphyxia Neonatorum.mp. or hypoxia.mp. or Asphyxias.mp. or Suffocation.mp. or Suffocations.mp. or anoxia.mp. or (intrapartum and related).mp. or exp tetanus/ or tetanus.mp. or tetani.mp. or diphtheria-tetanus-pertussis.mp. or exp rubella/ or exp measles/ or exp necrosis/ or exp jaundice/ or exp haemorrhage/ or rubella.mp. or measles.mp. or epidemic roseola.mp. or necrosis.mp. or necrotic.mp. or necroses.mp. or necrotizing.mp. or Infarction.mp. or infractions.mp. or birth injuries.mp. or birth injury.mp. or birth trauma.mp. or Obstetric Paralyzes.mp. or Obstetric Paralysis.mp. or Obstetrical Paralyzes.mp. or Obstetrical Paralysis.mp. or birth damage.mp. or birth lesion.mp. or birth palsy.mp. or birth paralysis.mp. or obstetric palsy.mp. or obstetrical palsy.mp. or brachial palsy.mp. or brachial paralysis.mp. or brachial plexus paralysis.mp. or delivery trauma.mp. or arm paralysis.mp. or paralysis brachialis.mp. or jaundice.mp. or jaundices.mp. or Icterus.mp. or bronze baby syndrome.mp. or erythroleukoblastosis.mp. or hemorrhage haemorrhage.mp. or haemorrhagic.mp. or Hemorrhagic.mp. or exp nutritional disorders/ or exp starvation/ or exp deficiency/ or exp refeeding/ or exp starvation/ or exp famine/ or exp underfeeding/ or malnutrition.mp. or Nutritional.mp. or Undernutrition.mp. or Malnourishment.mp. or Malnourishments.mp. or Deficiency.mp. or Deficiencies.mp. or Refeeding Syndrome.mp. or Starvation.mp. or Starvations.mp. or Famine.mp. or Famines.mp. or deficient.mp. or underfeeding.mp. or undernourishment.mp. or nutrition.mp. or Hypervitaminosis.mp. or exp infectious diseases/ or exp infant disorders/ or exp childhood diseases/ or Noncommunicable.mp. or Non-communicable.mp. or communicable.mp. or non-infectious.mp. or infectious.mp. or noninfectious.mp. or newborn.mp. or neonatal.mp. or perinatal.mp. [mp=abstract, title, original title, broad terms, heading words, identifiers, cabicodes] (1017753)</p> <p>4 (Argentina or Bolivia or Brazil or Brasil or Chile or Colombia or Ecuador or French Guiana or Guyana or Paraguay or Peru or Suriname or Uruguay or Venezuela or Mexico or Belize or Costa Rica or El Salvador or Guatemala or Honduras or Nicaragua or Puerto Rico or Panama or West Indies or Antigua or Barbuda or Bahamas or Barbados or Cuba or Dominica or Dominican Republic or Grenada or Guadeloupe or Haiti or Jamaica or Martinique or Antilles or Anguilla or Saint Kitts or St Kitts or Saint Lucia or St Lucia or Saint Vincent or St Vincent or Trinidad or Tobago or Virgin Islands or Kazakhstan or Kyrgyzstan or Tajikistan or Turkmenistan or Uzbekistan or Borneo or Brunei or Cambodia or East Timor or Indonesia or Laos or Malaysia or Mekong Valley or Myanmar or Burma or Philippines or Singapore or Thailand or Vietnam or Bangladesh or Bhutan or India or Nepal or Pakistan or Sri Lanka or China or Korea or Macao or Macau or Mongolia or Taiwan or Afghanistan or Bahrain or Iran or Iraq or Israel or Jordan or Kuwait or Lebanon or Oman or Qatar or Saudi Arabia or Syria or Turkey or United Arab Emirates or Yemen or Fiji or New Caledonia or Papua New Guinea or Vanuatu or Micronesia or Melanesia or Guam or Palau or Polynesia or Samoa or Tonga or Armenia or Azerbaijan or Georgia or Albania or Estonia or Latvia or Lithuania or Bosnia or Herzegovina or Serbia or Bulgaria or Belarus or Croatia or Czech Republic or Hungary or Macedonia or Moldova or Montenegro or Poland or Romania or Russia or Bashkiria or Dagestan or Slovakia or Slovenia or Ukraine or Cameroon or Central African Republic or Chad or Congo or Equatorial Guinea or Gabon or Burundi or Djibouti or Eritrea or Ethiopia or Kenya or Rwanda or Somalia or Sudan or Tanzania or Uganda or Angola or Botswana or Lesotho or Malawi or Mozambique or Namibia or South Africa or Swaziland or Zambia or Zimbabwe or Benin or Burkina Faso or Cote d'Ivoire or Gambia or Ghana or Guinea or Guinea-Bissau or Liberia or Mali or Mauritania or Niger or Nigeria or Senegal or Sierra Leone or Togo or Algeria or Egypt or Libya or Morocco or Tunisia or Comoros or Madagascar or Mauritius or Reunion or Seychelles or Cabo Verde or Kiribati or Marshall Islands or Nauru or Niue or Sao Tome or Solomon Islands or South Sudan).mp. or exp Developing Countries/ or exp Africa/ or exp Caribbean/ or exp Pacific Islands/ or exp Mexico/ or exp Latin America/ or exp South America/ or exp Indian Ocean Islands/ or exp Central America/ or exp Asia/ or exp Central Europe/ or Developing.mp. or Least Developed.mp. or Less-Developed.mp. or Less Developed.mp. or Under-Developed.mp. or Under Developed.mp. or UnderDeveloped.mp. or third-world.mp. or third world.mp. or Africa.mp. or Caribbean Region.mp. or West Indies.mp. or Pacific Islands.mp. or Micronesia.mp. or Melanesia.mp. or Polynesia.mp. or Mexico.mp. or Latin America.mp. or South America.mp. or Indian Ocean Islands.mp. or Pemba.mp. or Cocos.mp. or Maldives.mp. or Central America.mp. or Asia.mp. or far east.mp. or eastern europe.mp. or central Europe.mp. or province.mp. or provinces.mp. or district.mp. or districts.mp. or prefecture.mp. or prefectures.mp. or county.mp. or counties.mp. or municipality.mp. or municipalities.mp. [mp=abstract, title, original title, broad terms, heading words, identifiers, cabicodes] (1215351)</p> <p>5 (Animals not (man and animals)).od. (9520)</p> <p>6 (correspondence or Editorial).pt. (44890)</p> |                  |
| PAHO | (tw:("Infant" OR "Infant, Newborn" OR "child" OR "Child, Preschool" OR "Minors" OR "infant" OR "infants" OR "neonate" OR "neonates" OR "neonatal" OR "newborn" OR "newborns" OR "new-born" OR "new-borns" OR "baby" OR "babies" OR "Premature" OR "preterm" OR "pre term" OR "child" OR "children"                                                                                                                                                                                                                                                                                                                                                                                                                                                                                                                                                                                                                                                                                                                                                                                                                                                                                                                                                                                                                                                                                                                                                                                                                                                                                                                                                                                                                                                                                                                                                                                                                                                                                                                                                                                                                                                                                                                                                                                                                                                                                                                                                                                                                                                                                                                                                                                                                                                                                                                                                                                                                                                                                                                                                                                                                                                                                                                                                                                                                                                                                                                                                                                                                                                                                                                                                                                                                                                                                                                                                                                                                                                                                                                                                                                                                                                                                                                                                                                                                                                                                                                                                                                                                                                                                                                                                                                                                                                                                                                                                                                                                                                                                                                                                                                                                                                                                                                                                                                                                                                                                                                                                                                                                                                                                                                                                                                                                                                                                                                                                                                                                                                                                                                                                                                                                                                                                                                                                                                                                                                                                                                                                                                                                                                                                              | January 12, 2018 |

|                                                                                                                                                                                                                                                                                                                                                                                                                                                                                                                                                                                                                                                                                                                                                                                                                                                                                                                                                                                                                                                                                                                                                                                                                                                                                                                                                                                                                                                                                                                                                                                                                                                                                                                                                                                                                                                                                                                                                                                                                                                                                                                                                                                                                                                                                                                                                                                                                                                                                                                                                                                                                                                                                                                                                                                                                                                                                                                                                                                                                                                                                                                                                                                                                                                                                                                                                                                                                                                                                                                                                                                                                                                                                                                                                                                                                                                                                                                                                                                                                                                                                                                                                                                                                                                                                                                                                                                                                                                                                                                                                                                                                                                                                                                                                                                                                                                                                                                                                                                                                                                                                                                                                                                                                                                                                                                                                                                                                                                                                                                                                                                                                                                                                                                                                                                                                                                                                                                                                                                                                                                                                                                                                                                                                                                                                                                                                                                                                                                                                                                                                                                                                                                                                                                                |
|--------------------------------------------------------------------------------------------------------------------------------------------------------------------------------------------------------------------------------------------------------------------------------------------------------------------------------------------------------------------------------------------------------------------------------------------------------------------------------------------------------------------------------------------------------------------------------------------------------------------------------------------------------------------------------------------------------------------------------------------------------------------------------------------------------------------------------------------------------------------------------------------------------------------------------------------------------------------------------------------------------------------------------------------------------------------------------------------------------------------------------------------------------------------------------------------------------------------------------------------------------------------------------------------------------------------------------------------------------------------------------------------------------------------------------------------------------------------------------------------------------------------------------------------------------------------------------------------------------------------------------------------------------------------------------------------------------------------------------------------------------------------------------------------------------------------------------------------------------------------------------------------------------------------------------------------------------------------------------------------------------------------------------------------------------------------------------------------------------------------------------------------------------------------------------------------------------------------------------------------------------------------------------------------------------------------------------------------------------------------------------------------------------------------------------------------------------------------------------------------------------------------------------------------------------------------------------------------------------------------------------------------------------------------------------------------------------------------------------------------------------------------------------------------------------------------------------------------------------------------------------------------------------------------------------------------------------------------------------------------------------------------------------------------------------------------------------------------------------------------------------------------------------------------------------------------------------------------------------------------------------------------------------------------------------------------------------------------------------------------------------------------------------------------------------------------------------------------------------------------------------------------------------------------------------------------------------------------------------------------------------------------------------------------------------------------------------------------------------------------------------------------------------------------------------------------------------------------------------------------------------------------------------------------------------------------------------------------------------------------------------------------------------------------------------------------------------------------------------------------------------------------------------------------------------------------------------------------------------------------------------------------------------------------------------------------------------------------------------------------------------------------------------------------------------------------------------------------------------------------------------------------------------------------------------------------------------------------------------------------------------------------------------------------------------------------------------------------------------------------------------------------------------------------------------------------------------------------------------------------------------------------------------------------------------------------------------------------------------------------------------------------------------------------------------------------------------------------------------------------------------------------------------------------------------------------------------------------------------------------------------------------------------------------------------------------------------------------------------------------------------------------------------------------------------------------------------------------------------------------------------------------------------------------------------------------------------------------------------------------------------------------------------------------------------------------------------------------------------------------------------------------------------------------------------------------------------------------------------------------------------------------------------------------------------------------------------------------------------------------------------------------------------------------------------------------------------------------------------------------------------------------------------------------------------------------------------------------------------------------------------------------------------------------------------------------------------------------------------------------------------------------------------------------------------------------------------------------------------------------------------------------------------------------------------------------------------------------------------------------------------------------------------------------------------------------------------------------------------|
| <p>OR "youth" OR "youths" OR "young people" OR "childhood" OR "toddler" OR "toddlers" OR "kid" OR "kids" OR "young patient" OR "young patients" OR "boy" OR "boys" OR "girl" OR "girls" OR "young age" OR "pediatric" OR "pre-schooler" OR "preschooler" OR "under 5" OR "under five" OR "under fives" OR "less than five" OR "perinatal"))</p> <p>AND</p> <p>(tw:("Mortality" OR "Mortality" OR "Mortalities" OR "fatal" OR "fatality" OR "fatalities" OR "Death" OR "death" OR "deaths" OR "Child Mortality"))</p> <p>AND</p> <p>(tw:("Diarrhea" OR "Diarrhea" OR "Diarrheas" OR "Diarrheal" OR "diarrhoeal" OR "diarrhoea" OR "diarrhoeas" OR "Dysentery" OR "Dysentery" OR "dysentery" OR "enteritis" OR "enteritides" OR "Cholera" OR "Cholera" OR "Choleras" OR "vibrio Cholerae" OR "Gastroenteritis" OR "gastroenteritis" OR "gastroenteritides" OR "gastro enteritis" OR "gastroduodenitis" OR "gastrointestinal acute infection" OR "gastrointestinal acute infections" OR "gastrointestinal infection" OR "gastrointestinal infections" OR "digestive tract infection" OR "digestive tract infections" OR "digestive infection" OR "gastrointestinal tract infection" OR "gastrointestine tract infection" OR "Pneumonia" OR "pneumonia" OR "pneumonias" OR "pneumonitis" OR "pulmonary inflammation" OR "pulmonary inflammations" OR "lung inflammation" OR "Lung Inflammations" OR "inflammatory lung disease" OR "lobitis" OR "peripneumonia" OR "pleuropneumonia" OR "pleuropneumonitis" OR "pneumonitis" OR "pulmonal inflammation" OR "pulmonary inflammation" OR "pulmonic inflammation" OR "bronchopneumonia" OR "bronchopneumonias" OR "Respiratory Tract Infections" OR "Respiratory Tract Infections" OR "Respiratory Tract Infection" OR "Respiratory Infection" OR "Respiratory Infections" OR "whooping cough" OR "pertussis" OR "pulmonary tract infection" OR "respiration infection" OR "Bronchiolitis" OR " bronchitis" OR "bronchopulmonary infection" OR "Croup" OR "Croup" OR "diphtheria" OR "laryngitis" OR "Severe Acute Respiratory Syndrome" OR "Severe Acute Respiratory Syndrome" OR "SARS" OR "Acute Chest Syndrome" OR "acute chest syndrome" OR "acute chest syndromes" OR "Acute Lower Respiratory Infection" OR "Acute Lower Respiratory Infections" OR "ALRI" OR "LRI" OR "ARI" OR "respiration tract infection" OR "respiration tract infections" OR "legionnaire disease" OR "legionnaires disease" OR "legionnaires disease" OR "Pontiac fever" OR "lung infiltrate" OR "lung infiltration" OR "pulmonary infiltrate" OR "pulmonary infiltration" OR "pneumonic lung" OR "rds" OR "respiratory distress" OR "respiration distress" OR "Malaria" OR "malaria" OR "malarias" OR "Plasmodium Infection" OR "Plasmodium Infections" OR "Plasmodium falciparum" OR "Plasmodium falciparum" OR "Plasmodium falciparums" OR "malaria, falciparum" OR "blackwater fever" OR "blackwater fevers" OR "black water fever" OR "black water fevers" OR "remittent fever" OR "paludism" OR "plasmodium infection" OR "plasmodium infections" OR "marsh fever" OR "falciparum infection" OR "Plasmodium vivax" OR "Plasmodium vivax" OR "Plasmodium vivaxs" OR "malaria, vivax" OR "vivax infection" OR "Plasmodium ovale" OR "Plasmodium ovale" OR "Plasmodium ovals" OR "Plasmodium malariae" OR "Plasmodium malariae" OR "Meningitis" OR "Meningitis" OR "Meningitides" OR "Pachymeningitis" OR "Pachymeningitides" OR "Arachnoiditis" OR "Arachnoiditides" OR "Arachnoid Membrane inflammation" OR "Arachnoid Membrane inflammations" OR "Meningoencephalitis" OR "Meningoencephalitis" OR "Meningocephalitis" OR "Cerebro meningitis" OR "Encephalomeningitis" OR "Encephalomeningitides" OR "Haemophilus influenzae" OR "Haemophilus parainfluenzae" OR "Cerebro meningitides" OR "Cerebritis" OR "Cerebritides" OR "Waterhouse Friderichsen Syndrome" OR "Waterhouse Friderichsen Syndrome" OR "Waterhouse-Friderichsen Syndrome" OR "Waterhouse-Friderichsen Syndrome" OR "Purpura Fulminans" OR "Meningococcal" OR "Meningeal" OR "Cerebral Cryptococcosis" OR "Cerebral Cryptococcoses" OR "Toruloma" OR "Torulomas" OR "Lymphocytic Choriomeningitis" OR "Armstrong Syndrome" OR "Armstrong's Syndrome" OR "Encephalitis" "Encephalitis" OR "Encephalitides" OR "encephalitis" OR "brain inflammation" OR "brain inflammations" OR "Rasmussen syndrome" OR "Rasmussen's syndrome" OR "Cerebral Ventriculitis" OR "Cerebral Ventriculitides" OR "Infectious Ventriculitis" OR "Infectious Ventriculitides" OR "Encephalomyelitis" OR "Meningoencephalitis" OR "Meningoencephalitis" OR "Cerebro meningitis" OR "myeloencephalitis" OR "Lupus Vasculitis" OR "Central Nervous System Lupus" OR "Lupus Erythematosus" OR "Lupus Erythematosus" OR "brain vasculitis" OR "brain angiitis" OR "brain arteritis" OR "cerebral arteritis" OR "cerebral vasculitis" OR "Neisseria meningitidis" OR "Neisseria meningitidis" OR "Neisseria meningitidis" OR "Micrococcus intracellularis" OR "Neisseria weichselbaumi" OR "Meningococcus" OR "meningococemia" OR "meningococci" OR "Meningococcal infections" OR "meningococcal" OR "meningococcaemia" OR "sepsis" OR "sepsis" OR "Pyemia" OR "Pyemias" OR "Pyohemia" OR "Pyohemias" OR "Pyemia" OR "Pyemias" OR "Septicemia" OR "Septicemias" OR "Blood Poisoning" OR "Blood Poisonings" OR "septic" OR "sepsis" OR "congenital abnormalities" OR "congenital" OR "Deformities" OR "Deformity" OR "Birth Defects" OR "Birth Defect" OR "abnormality" OR "abnormalities" OR "malformation" OR "malformations" OR "malformative" OR "malformed" OR "neural tube defects" OR "neural tube" OR "Craniorachischisis" OR "Craniorachischises" OR "Diastematomyelia" OR "Diastematomyelias" OR "Tethered Cord" OR "Spinal Dysraphism" OR "Tethered Spinal Cord" OR "Spinal Dysraphisms" OR "Iniencephaly" OR "Iniencephalies" OR "Neuroenteric" OR "Neuroenteric" OR "Spinal Cord Myelodysplasia" OR "Spinal Cord Myelodysplasias" OR "Acrania" OR "Acranias" OR "Exencephaly" OR "Exencephalies" OR "dysgraphia" OR "dysraphic" OR "dysraphism" OR "dysraphy" OR "NTD" OR "NTDS" OR "sudden infant death syndrome" OR "sudden infant death" OR "sid" OR "SIDS" OR "cot death" OR "cot deaths" OR "crib death" OR "fetal alcohol spectrum disorders" OR "Fetal alcohol spectrum" OR "Foetal alcohol spectrum" OR "FASD" OR "FASDs" OR "Fetal Alcohol Syndrome" OR "Alcohol-Related Birth Defects" OR "Alcohol Related Birth Defects" OR "Alcohol Related Neurodevelopmental Disorder" OR "FAE" OR "Fetal Alcohol Effects" OR "FAEs" OR "Fetal Alcohol Syndrome" OR "Fetus Alcohol Syndrome" OR "Foetal alcohol syndrome" OR "premature birth"</p> |
|--------------------------------------------------------------------------------------------------------------------------------------------------------------------------------------------------------------------------------------------------------------------------------------------------------------------------------------------------------------------------------------------------------------------------------------------------------------------------------------------------------------------------------------------------------------------------------------------------------------------------------------------------------------------------------------------------------------------------------------------------------------------------------------------------------------------------------------------------------------------------------------------------------------------------------------------------------------------------------------------------------------------------------------------------------------------------------------------------------------------------------------------------------------------------------------------------------------------------------------------------------------------------------------------------------------------------------------------------------------------------------------------------------------------------------------------------------------------------------------------------------------------------------------------------------------------------------------------------------------------------------------------------------------------------------------------------------------------------------------------------------------------------------------------------------------------------------------------------------------------------------------------------------------------------------------------------------------------------------------------------------------------------------------------------------------------------------------------------------------------------------------------------------------------------------------------------------------------------------------------------------------------------------------------------------------------------------------------------------------------------------------------------------------------------------------------------------------------------------------------------------------------------------------------------------------------------------------------------------------------------------------------------------------------------------------------------------------------------------------------------------------------------------------------------------------------------------------------------------------------------------------------------------------------------------------------------------------------------------------------------------------------------------------------------------------------------------------------------------------------------------------------------------------------------------------------------------------------------------------------------------------------------------------------------------------------------------------------------------------------------------------------------------------------------------------------------------------------------------------------------------------------------------------------------------------------------------------------------------------------------------------------------------------------------------------------------------------------------------------------------------------------------------------------------------------------------------------------------------------------------------------------------------------------------------------------------------------------------------------------------------------------------------------------------------------------------------------------------------------------------------------------------------------------------------------------------------------------------------------------------------------------------------------------------------------------------------------------------------------------------------------------------------------------------------------------------------------------------------------------------------------------------------------------------------------------------------------------------------------------------------------------------------------------------------------------------------------------------------------------------------------------------------------------------------------------------------------------------------------------------------------------------------------------------------------------------------------------------------------------------------------------------------------------------------------------------------------------------------------------------------------------------------------------------------------------------------------------------------------------------------------------------------------------------------------------------------------------------------------------------------------------------------------------------------------------------------------------------------------------------------------------------------------------------------------------------------------------------------------------------------------------------------------------------------------------------------------------------------------------------------------------------------------------------------------------------------------------------------------------------------------------------------------------------------------------------------------------------------------------------------------------------------------------------------------------------------------------------------------------------------------------------------------------------------------------------------------------------------------------------------------------------------------------------------------------------------------------------------------------------------------------------------------------------------------------------------------------------------------------------------------------------------------------------------------------------------------------------------------------------------------------------------------------------------------------------------------------------------|

|          |                                                                                                                                                                                                                                                                                                                                                                                                                                                                                                                                                                                                                                                                                                                                                                                                                                                                                                                                                                                                                                                                                                                                                                                                                                                                                                                                                                                                                                                                                                                                                                                                                                                                                                                                                                                                                                                                                                                                                                                                                                                                                                                                                                                                                                                                                                                                                                                                                                                                                                                                                                                                                                                                                                                                                                                                                                                                                                                                                                                                                                                                                                                                                                                                                                                                                                                                                                                                                                                                                                                                                                                                                                                                                                                                                                                                                                                                                                                                                                                                                                                                                                                                                                                                                                                                                                                                                                                                                                                                                                                                                                                                                                                                                                                                                                                                                                                                                                                                                                                                                                                                                                                                                                                                                                                                                                                                                                                                                                                                                                                                  |                  |
|----------|----------------------------------------------------------------------------------------------------------------------------------------------------------------------------------------------------------------------------------------------------------------------------------------------------------------------------------------------------------------------------------------------------------------------------------------------------------------------------------------------------------------------------------------------------------------------------------------------------------------------------------------------------------------------------------------------------------------------------------------------------------------------------------------------------------------------------------------------------------------------------------------------------------------------------------------------------------------------------------------------------------------------------------------------------------------------------------------------------------------------------------------------------------------------------------------------------------------------------------------------------------------------------------------------------------------------------------------------------------------------------------------------------------------------------------------------------------------------------------------------------------------------------------------------------------------------------------------------------------------------------------------------------------------------------------------------------------------------------------------------------------------------------------------------------------------------------------------------------------------------------------------------------------------------------------------------------------------------------------------------------------------------------------------------------------------------------------------------------------------------------------------------------------------------------------------------------------------------------------------------------------------------------------------------------------------------------------------------------------------------------------------------------------------------------------------------------------------------------------------------------------------------------------------------------------------------------------------------------------------------------------------------------------------------------------------------------------------------------------------------------------------------------------------------------------------------------------------------------------------------------------------------------------------------------------------------------------------------------------------------------------------------------------------------------------------------------------------------------------------------------------------------------------------------------------------------------------------------------------------------------------------------------------------------------------------------------------------------------------------------------------------------------------------------------------------------------------------------------------------------------------------------------------------------------------------------------------------------------------------------------------------------------------------------------------------------------------------------------------------------------------------------------------------------------------------------------------------------------------------------------------------------------------------------------------------------------------------------------------------------------------------------------------------------------------------------------------------------------------------------------------------------------------------------------------------------------------------------------------------------------------------------------------------------------------------------------------------------------------------------------------------------------------------------------------------------------------------------------------------------------------------------------------------------------------------------------------------------------------------------------------------------------------------------------------------------------------------------------------------------------------------------------------------------------------------------------------------------------------------------------------------------------------------------------------------------------------------------------------------------------------------------------------------------------------------------------------------------------------------------------------------------------------------------------------------------------------------------------------------------------------------------------------------------------------------------------------------------------------------------------------------------------------------------------------------------------------------------------------------------------------------------------------|------------------|
|          | <p>OR "premature" OR "preterm" OR "pre-mature" OR "pre-term" OR "prematurity" OR "prematurnitas" OR "asphyxia" OR "asphyxia" OR "Asphyxia Neonatorum" OR "Asphyxia Neonatorum" OR "hypoxia" OR "Asphyxias" OR "Suffocation" OR "Suffocations" OR "anoxia" OR ("Intrapartum" AND "related") OR "tetanus" OR "tetanus" OR "tetani" OR "diphtheria-tetanus-pertussis" OR "rubella" OR "rubella" OR "measles" OR "epidemic roseola" OR "necrosis" OR "necrosis" OR "necrotic" OR "necroses" OR "necrotizing" OR "Infarction" OR "infractions" OR "birth injuries" OR "birth injuries" OR "birth injury" OR "birth trauma" OR "Obstetric Paralyse" OR "Obstetric Paralysis" OR "Obstetrical Paralyse" OR "Obstetrical Paralysis" OR "birth damage" OR "birth lesion" OR "birth palsy" OR "birth paralysis" OR "obstetric palsy" OR "obstetrical palsy" OR "brachial palsy" OR "brachial paralysis" OR "brachial plexus paralysis" OR "delivery trauma" OR "arm paralysis" OR "paralysis brachialis" OR "jaundice" OR "jaundice" OR "jaundices" OR "Icterus" OR "bronze baby syndrome" OR "erythroleukoblastosis" OR "hemorrhage" OR "hemorrhage" OR "haemorrhagic" OR "haemorrhagic" OR "Hemorrhagic" OR "Nutrition disorders" OR "malnutrition" OR "Nutritional" OR "Undernutrition" OR "Malnourishment" OR "Malnourishments" OR "Deficiency" OR "Deficiencies" OR "Refeeding Syndrome" OR "Starvation" OR "Starvations" OR "Famine" OR "Famines" OR "deficient" OR "underfeeding" OR "undernourishment" OR "nutrition" OR "Hypervitaminosis" OR "Noncommunicable Diseases" OR "Noncommunicable" OR "Non-communicable" OR "communicable" OR "non-infectious" OR "infectious" OR "noninfectious" OR "Communicable Diseases" OR "Infant, Newborn, Diseases" OR "newborn" OR "neonatal" OR "perinatal")</p> <p>AND</p> <p>(tw:("Argentina" OR "Bolivia" OR "Brazil" OR "Brasil" OR "Chile" OR "Colombia" OR "Ecuador" OR "French Guiana" OR "Guyana" OR "Paraguay" OR "Peru" OR "Suriname" OR "Uruguay" OR "Venezuela" OR "Mexico" OR "Belize" OR "Costa Rica" OR "El Salvador" OR "Guatemala" OR "Honduras" OR "Nicaragua" OR "Puerto Rico" OR "Panama" OR "West Indies" OR "Antigua" OR "Barbuda" OR "Bahamas" OR "Barbados" OR "Cuba" OR "Dominica" OR "Dominican Republic" OR "Grenada" OR "Guadeloupe" OR "Haiti" OR "Jamaica" OR "Martinique" OR "Antilles" OR "Anguilla" OR "Saint Kitts" OR "St Kitts" OR "Saint Lucia" OR "St Lucia" OR "Saint Vincent" OR "St Vincent" OR "Trinidad" OR "Tobago" OR "Virgin Islands" OR "Kazakhstan" OR "Kyrgyzstan" OR "Tajikistan" OR "Turkmenistan" OR "Uzbekistan" OR "Borneo" OR "Brunei" OR "Cambodia" OR "East Timor" OR "Indonesia" OR "Laos" OR "Malaysia" OR "Mekong Valley" OR "Myanmar" OR "Burma" OR "Philippines" OR "Singapore" OR "Thailand" OR "Vietnam" OR "Bangladesh" OR "Bhutan" OR "India" OR "Nepal" OR "Pakistan" OR "Sri Lanka" OR "China" OR "Korea" OR "Macao" OR "Macau" OR "Mongolia" OR "Taiwan" OR "Afghanistan" OR "Bahrain" OR "Iran" OR "Iraq" OR "Israel" OR "Jordan" OR "Kuwait" OR "Lebanon" OR "Oman" OR "Qatar" OR "Saudi Arabia" OR "Syria" OR "Turkey" OR "United Arab Emirates" OR "Yemen" OR "Fiji" OR "New Caledonia" OR "Papua New Guinea" OR "Vanuatu" OR "Micronesia" OR "Melanesia" OR "Guam" OR "Palau" OR "Polynesia" OR "Samoa" OR "Tonga" OR "Armenia" OR "Azerbaijan" OR "Georgia" OR "Albania" OR "Estonia" OR "Latvia" OR "Lithuania" OR "Bosnia" OR "Herzegovina" OR "Serbia" OR "Bulgaria" OR "Belarus" OR "Croatia" OR "Czech Republic" OR "Hungary" OR "Macedonia" OR "Moldova" OR "Montenegro" OR "Poland" OR "Romania" OR "Russia" OR "Bashkiria" OR "Dagestan" OR "Slovakia" OR "Slovenia" OR "Ukraine" OR "Cameroon" OR "Central African Republic" OR "Chad" OR "Congo" OR "Equatorial Guinea" OR "Gabon" OR "Burundi" OR "Djibouti" OR "Eritrea" OR "Ethiopia" OR "Kenya" OR "Rwanda" OR "Somalia" OR "Sudan" OR "Tanzania" OR "Uganda" OR "Angola" OR "Botswana" OR "Lesotho" OR "Malawi" OR "Mozambique" OR "Namibia" OR "South Africa" OR "Swaziland" OR "Zambia" OR "Zimbabwe" OR "Benin" OR "Burkina Faso" OR "Cote d'Ivoire" OR "Gambia" OR "Ghana" OR "Guinea" OR "Guinea-Bissau" OR "Liberia" OR "Mali" OR "Mauritania" OR "Niger" OR "Nigeria" OR "Senegal" OR "Sierra Leone" OR "Togo" OR "Algeria" OR "Egypt" OR "Libya" OR "Morocco" OR "Tunisia" OR "Comoros" OR "Madagascar" OR "Mauritius" OR "Reunion" OR "Seychelles" OR "Cabo Verde" OR "Kiribati" OR "Marshall Islands" OR "Nauru" OR "Niue" OR "Sao Tome" OR "Solomon Island" OR "South Sudan" OR "Developing Countries" OR "Developing" OR "Least Developed" OR "Less-Developed" OR "Less Developed" OR "Under-Developed" OR "Under Developed" OR "UnderDeveloped" OR "third-world" OR "third world" OR "Africa" OR "Africa" OR "Caribbean Region" OR "Caribbean Region" OR "West Indies" OR "Pacific Islands" OR "Pacific Islands" OR "Micronesia" OR "Melanesia" OR "Polynesia" OR "Mexico" OR "Mexico" OR "Latin America" OR "Latin America" OR "South America" OR "South America" OR "Indian Ocean Islands" OR "Indian Ocean Islands" OR "Pemba" OR "Cocos" OR "Maldives" OR "Central America" OR "Central America" OR "Asia" OR "Asia" OR "far east" OR "eastern europe" OR "eastern europe" OR "province" OR "provinces" OR "district" OR "districts" OR "prefecture" OR "prefectures" OR "county" OR "counties" OR "municipality" OR "municipalities"))</p> <p>AND</p> <p>(db:("PAHOIRIS" OR "PAHO"))</p> <p>AND</p> <p>(instance:"regional")</p> |                  |
| Cochrane | <p>ID Search</p> <p>#1 MeSH descriptor: [Mortality] explode all trees</p> <p>#2 MeSH descriptor: [Death] explode all trees</p> <p>#3 "Mortality" or "Mortalities" or "fatal" or "fatality" or "fatalities" or "death" or "deaths":ti,ab,kw</p> <p>#4 #1 or #2 or #3</p>                                                                                                                                                                                                                                                                                                                                                                                                                                                                                                                                                                                                                                                                                                                                                                                                                                                                                                                                                                                                                                                                                                                                                                                                                                                                                                                                                                                                                                                                                                                                                                                                                                                                                                                                                                                                                                                                                                                                                                                                                                                                                                                                                                                                                                                                                                                                                                                                                                                                                                                                                                                                                                                                                                                                                                                                                                                                                                                                                                                                                                                                                                                                                                                                                                                                                                                                                                                                                                                                                                                                                                                                                                                                                                                                                                                                                                                                                                                                                                                                                                                                                                                                                                                                                                                                                                                                                                                                                                                                                                                                                                                                                                                                                                                                                                                                                                                                                                                                                                                                                                                                                                                                                                                                                                                          | January 12, 2018 |

|     |                                                                                                                                                                                                                                                                                                                                                                                                                                                                                                                                                                                                                                                                                                                                                                                                                                                                                                                                                                                                                                                                                                                                                                                                                                                                                                                                                                                                                                                                                                                                                                                                                                                                                                                                                                                                                                                                                                                                                                                                                                                                                                                                                                                                                                                                                                                                                                                                                                                                                                                                                                                                                   |
|-----|-------------------------------------------------------------------------------------------------------------------------------------------------------------------------------------------------------------------------------------------------------------------------------------------------------------------------------------------------------------------------------------------------------------------------------------------------------------------------------------------------------------------------------------------------------------------------------------------------------------------------------------------------------------------------------------------------------------------------------------------------------------------------------------------------------------------------------------------------------------------------------------------------------------------------------------------------------------------------------------------------------------------------------------------------------------------------------------------------------------------------------------------------------------------------------------------------------------------------------------------------------------------------------------------------------------------------------------------------------------------------------------------------------------------------------------------------------------------------------------------------------------------------------------------------------------------------------------------------------------------------------------------------------------------------------------------------------------------------------------------------------------------------------------------------------------------------------------------------------------------------------------------------------------------------------------------------------------------------------------------------------------------------------------------------------------------------------------------------------------------------------------------------------------------------------------------------------------------------------------------------------------------------------------------------------------------------------------------------------------------------------------------------------------------------------------------------------------------------------------------------------------------------------------------------------------------------------------------------------------------|
| #5  | MeSH descriptor: [Infant] explode all trees                                                                                                                                                                                                                                                                                                                                                                                                                                                                                                                                                                                                                                                                                                                                                                                                                                                                                                                                                                                                                                                                                                                                                                                                                                                                                                                                                                                                                                                                                                                                                                                                                                                                                                                                                                                                                                                                                                                                                                                                                                                                                                                                                                                                                                                                                                                                                                                                                                                                                                                                                                       |
| #6  | MeSH descriptor: [Child] explode all trees                                                                                                                                                                                                                                                                                                                                                                                                                                                                                                                                                                                                                                                                                                                                                                                                                                                                                                                                                                                                                                                                                                                                                                                                                                                                                                                                                                                                                                                                                                                                                                                                                                                                                                                                                                                                                                                                                                                                                                                                                                                                                                                                                                                                                                                                                                                                                                                                                                                                                                                                                                        |
| #7  | MeSH descriptor: [Minors] explode all trees                                                                                                                                                                                                                                                                                                                                                                                                                                                                                                                                                                                                                                                                                                                                                                                                                                                                                                                                                                                                                                                                                                                                                                                                                                                                                                                                                                                                                                                                                                                                                                                                                                                                                                                                                                                                                                                                                                                                                                                                                                                                                                                                                                                                                                                                                                                                                                                                                                                                                                                                                                       |
| #8  | "infant" or "infants" or "neonate" or "neonates" or "neonatal" or "newborn" or "newborns" or "new-born" or "new-borns" or "baby" or "babies" or "Premature" or "preterm" or "pre term" or "child" or "children" or "youth" or "youths" or "young people" or "childhood" or "toddler" or "toddlers" or "kid" or "kids" or "young patient" or "young patients" or "boy" or "boys" or "girl" or "girls" or "young age" or "pediatric" or "pre-schooler" or "preschooler" or "under 5" or "under five" or "under fives" or "less than five" or "perinatal":ti,ab,kw (Word variations have been searched)                                                                                                                                                                                                                                                                                                                                                                                                                                                                                                                                                                                                                                                                                                                                                                                                                                                                                                                                                                                                                                                                                                                                                                                                                                                                                                                                                                                                                                                                                                                                                                                                                                                                                                                                                                                                                                                                                                                                                                                                              |
| #9  | #5 or #6 or #7 or #8                                                                                                                                                                                                                                                                                                                                                                                                                                                                                                                                                                                                                                                                                                                                                                                                                                                                                                                                                                                                                                                                                                                                                                                                                                                                                                                                                                                                                                                                                                                                                                                                                                                                                                                                                                                                                                                                                                                                                                                                                                                                                                                                                                                                                                                                                                                                                                                                                                                                                                                                                                                              |
| #10 | "Argentina" or "Bolivia" or "Brazil" or "Brasil" or "Chile" or "Colombia" or "Ecuador" or "French Guiana" or "Guyana" or "Paraguay" or "Peru" or "Suriname" or "Uruguay" or "Venezuela" or "Mexico" or "Belize" or "Costa Rica" or "El Salvador" or "Guatemala" or "Honduras" or "Nicaragua" or "Puerto Rico" or "Panama" or "West Indies" or "Antigua" or "Barbuda" or "Bahamas" or "Barbados" or "Cuba" or "Dominica" or "Dominican Republic" or "Grenada" or "Guadeloupe" or "Haiti" or "Jamaica" or "Martinique" or "Antilles" or "Anguilla" or "Saint Kitts" or "St Kitts" or "Saint Lucia" or "St Lucia" or "Saint Vincent" or "St Vincent" or "Trinidad" or "Tobago" or "Virgin Islands" or "Kazakhstan" or "Kyrgyzstan" or "Tajikistan" or "Turkmenistan" or "Uzbekistan" or "Borneo" or "Brunei" or "Cambodia" or "East Timor" or "Indonesia" or "Laos" or "Malaysia" or "Mekong Valley" or "Myanmar" or "Burma" or "Philippines" or "Singapore" or "Thailand" or "Vietnam" or "Bangladesh" or "Bhutan" or "India" or "Nepal" or "Pakistan" or "Sri Lanka" or "China" or "Korea" or "Macao" or "Macau" or "Mongolia" or "Taiwan" or "Afghanistan" or "Bahrain" or "Iran" or "Iraq" or "Israel" or "Jordan" or "Kuwait" or "Lebanon" or "Oman" or "Qatar" or "Saudi Arabia" or "Syria" or "Turkey" or "United Arab Emirates" or "Yemen" or "Fiji" or "New Caledonia" or "Papua New Guinea" or "Vanuatu" or "Micronesia" or "Melanesia" or "Guam" or "Palau" or "Polynesia" or "Samoa" or "Tonga" or "Armenia" or "Azerbaijan" or "Georgia" or "Albania" or "Estonia" or "Latvia" or "Lithuania" or "Bosnia" or "Herzegovina" or "Serbia" or "Bulgaria" or "Belarus" or "Croatia" or "Czech Republic" or "Hungary" or "Macedonia" or "Moldova" or "Montenegro" or "Poland" or "Romania" or "Russia" or "Bashkiria" or "Dagestan" or "Slovakia" or "Slovenia" or "Ukraine" or "Cameroon" or "Central African Republic" or "Chad" or "Congo" or "Equatorial Guinea" or "Gabon" or "Burundi" or "Djibouti" or "Eritrea" or "Ethiopia" or "Kenya" or "Rwanda" or "Somalia" or "Sudan" or "Tanzania" or "Uganda" or "Angola" or "Botswana" or "Lesotho" or "Malawi" or "Mozambique" or "Namibia" or "South Africa" or "Swaziland" or "Zambia" or "Zimbabwe" or "Benin" or "Burkina Faso" or "Cote d'Ivoire" or "Gambia" or "Ghana" or "Guinea" or "Guinea-Bissau" or "Liberia" or "Mali" or "Mauritania" or "Niger" or "Nigeria" or "Senegal" or "Sierra Leone" or "Togo" or "Algeria" or "Egypt" or "Libya" or "Morocco" or "Tunisia" or "Comoros" or "Madagascar" or "Mauritius" or "Reunion" or "Seychelles" |
| #11 | MeSH descriptor: [Developing Countries] explode all trees                                                                                                                                                                                                                                                                                                                                                                                                                                                                                                                                                                                                                                                                                                                                                                                                                                                                                                                                                                                                                                                                                                                                                                                                                                                                                                                                                                                                                                                                                                                                                                                                                                                                                                                                                                                                                                                                                                                                                                                                                                                                                                                                                                                                                                                                                                                                                                                                                                                                                                                                                         |
| #12 | MeSH descriptor: [Africa] explode all trees                                                                                                                                                                                                                                                                                                                                                                                                                                                                                                                                                                                                                                                                                                                                                                                                                                                                                                                                                                                                                                                                                                                                                                                                                                                                                                                                                                                                                                                                                                                                                                                                                                                                                                                                                                                                                                                                                                                                                                                                                                                                                                                                                                                                                                                                                                                                                                                                                                                                                                                                                                       |
| #13 | MeSH descriptor: [Caribbean Region] explode all trees                                                                                                                                                                                                                                                                                                                                                                                                                                                                                                                                                                                                                                                                                                                                                                                                                                                                                                                                                                                                                                                                                                                                                                                                                                                                                                                                                                                                                                                                                                                                                                                                                                                                                                                                                                                                                                                                                                                                                                                                                                                                                                                                                                                                                                                                                                                                                                                                                                                                                                                                                             |
| #14 | MeSH descriptor: [Pacific Islands] explode all trees                                                                                                                                                                                                                                                                                                                                                                                                                                                                                                                                                                                                                                                                                                                                                                                                                                                                                                                                                                                                                                                                                                                                                                                                                                                                                                                                                                                                                                                                                                                                                                                                                                                                                                                                                                                                                                                                                                                                                                                                                                                                                                                                                                                                                                                                                                                                                                                                                                                                                                                                                              |
| #15 | MeSH descriptor: [Mexico] explode all trees                                                                                                                                                                                                                                                                                                                                                                                                                                                                                                                                                                                                                                                                                                                                                                                                                                                                                                                                                                                                                                                                                                                                                                                                                                                                                                                                                                                                                                                                                                                                                                                                                                                                                                                                                                                                                                                                                                                                                                                                                                                                                                                                                                                                                                                                                                                                                                                                                                                                                                                                                                       |
| #16 | MeSH descriptor: [Latin America] explode all trees                                                                                                                                                                                                                                                                                                                                                                                                                                                                                                                                                                                                                                                                                                                                                                                                                                                                                                                                                                                                                                                                                                                                                                                                                                                                                                                                                                                                                                                                                                                                                                                                                                                                                                                                                                                                                                                                                                                                                                                                                                                                                                                                                                                                                                                                                                                                                                                                                                                                                                                                                                |
| #17 | MeSH descriptor: [Indian Ocean Islands] explode all trees                                                                                                                                                                                                                                                                                                                                                                                                                                                                                                                                                                                                                                                                                                                                                                                                                                                                                                                                                                                                                                                                                                                                                                                                                                                                                                                                                                                                                                                                                                                                                                                                                                                                                                                                                                                                                                                                                                                                                                                                                                                                                                                                                                                                                                                                                                                                                                                                                                                                                                                                                         |
| #18 | MeSH descriptor: [Asia] explode all trees                                                                                                                                                                                                                                                                                                                                                                                                                                                                                                                                                                                                                                                                                                                                                                                                                                                                                                                                                                                                                                                                                                                                                                                                                                                                                                                                                                                                                                                                                                                                                                                                                                                                                                                                                                                                                                                                                                                                                                                                                                                                                                                                                                                                                                                                                                                                                                                                                                                                                                                                                                         |
| #19 | MeSH descriptor: [Central America] explode all trees                                                                                                                                                                                                                                                                                                                                                                                                                                                                                                                                                                                                                                                                                                                                                                                                                                                                                                                                                                                                                                                                                                                                                                                                                                                                                                                                                                                                                                                                                                                                                                                                                                                                                                                                                                                                                                                                                                                                                                                                                                                                                                                                                                                                                                                                                                                                                                                                                                                                                                                                                              |
| #20 | MeSH descriptor: [South America] explode all trees                                                                                                                                                                                                                                                                                                                                                                                                                                                                                                                                                                                                                                                                                                                                                                                                                                                                                                                                                                                                                                                                                                                                                                                                                                                                                                                                                                                                                                                                                                                                                                                                                                                                                                                                                                                                                                                                                                                                                                                                                                                                                                                                                                                                                                                                                                                                                                                                                                                                                                                                                                |
| #21 | MeSH descriptor: [Europe, Eastern] explode all trees                                                                                                                                                                                                                                                                                                                                                                                                                                                                                                                                                                                                                                                                                                                                                                                                                                                                                                                                                                                                                                                                                                                                                                                                                                                                                                                                                                                                                                                                                                                                                                                                                                                                                                                                                                                                                                                                                                                                                                                                                                                                                                                                                                                                                                                                                                                                                                                                                                                                                                                                                              |
| #22 | "Developing" or "Least Developed" or "Less-Developed" or "Under-Developed" or "Under Developed" or "UnderDeveloped" or "third-world" or "third world" or "Africa" or "Caribbean Region" or "West Indies" or "Pacific Islands" or "Micronesia" or "Melanesia" or "Polynesia" or "Mexico" or "Latin America" or "South America" or "Indian Ocean Islands" or "Pemba" or "Cocos" or "Maldives" or "Central America" or "Asia" or "far east" or "eastern europe":ti,ab,kw                                                                                                                                                                                                                                                                                                                                                                                                                                                                                                                                                                                                                                                                                                                                                                                                                                                                                                                                                                                                                                                                                                                                                                                                                                                                                                                                                                                                                                                                                                                                                                                                                                                                                                                                                                                                                                                                                                                                                                                                                                                                                                                                             |
| #23 | #11 or #12 or #13 or #14 or #15 or #16 or #17 or #18 or #19 or #20 or #21 or #22                                                                                                                                                                                                                                                                                                                                                                                                                                                                                                                                                                                                                                                                                                                                                                                                                                                                                                                                                                                                                                                                                                                                                                                                                                                                                                                                                                                                                                                                                                                                                                                                                                                                                                                                                                                                                                                                                                                                                                                                                                                                                                                                                                                                                                                                                                                                                                                                                                                                                                                                  |
| #24 | "province" or "provinces" or "district" or "districts" or "prefecture" or "prefectures" or "county" or "counties" or "municipality" or "municipalities":ti,ab,kw                                                                                                                                                                                                                                                                                                                                                                                                                                                                                                                                                                                                                                                                                                                                                                                                                                                                                                                                                                                                                                                                                                                                                                                                                                                                                                                                                                                                                                                                                                                                                                                                                                                                                                                                                                                                                                                                                                                                                                                                                                                                                                                                                                                                                                                                                                                                                                                                                                                  |
| #25 | MeSH descriptor: [Animals] explode all trees                                                                                                                                                                                                                                                                                                                                                                                                                                                                                                                                                                                                                                                                                                                                                                                                                                                                                                                                                                                                                                                                                                                                                                                                                                                                                                                                                                                                                                                                                                                                                                                                                                                                                                                                                                                                                                                                                                                                                                                                                                                                                                                                                                                                                                                                                                                                                                                                                                                                                                                                                                      |
| #26 | case reports:pt (Word variations have been searched)                                                                                                                                                                                                                                                                                                                                                                                                                                                                                                                                                                                                                                                                                                                                                                                                                                                                                                                                                                                                                                                                                                                                                                                                                                                                                                                                                                                                                                                                                                                                                                                                                                                                                                                                                                                                                                                                                                                                                                                                                                                                                                                                                                                                                                                                                                                                                                                                                                                                                                                                                              |
| #27 | editorial:pt (Word variations have been searched)                                                                                                                                                                                                                                                                                                                                                                                                                                                                                                                                                                                                                                                                                                                                                                                                                                                                                                                                                                                                                                                                                                                                                                                                                                                                                                                                                                                                                                                                                                                                                                                                                                                                                                                                                                                                                                                                                                                                                                                                                                                                                                                                                                                                                                                                                                                                                                                                                                                                                                                                                                 |
| #28 | comment:pt (Word variations have been searched)                                                                                                                                                                                                                                                                                                                                                                                                                                                                                                                                                                                                                                                                                                                                                                                                                                                                                                                                                                                                                                                                                                                                                                                                                                                                                                                                                                                                                                                                                                                                                                                                                                                                                                                                                                                                                                                                                                                                                                                                                                                                                                                                                                                                                                                                                                                                                                                                                                                                                                                                                                   |

|     |                                                                                                                                                                                                                                                                                                                                                                                                                                                                                                                                                                                                                                                                                                                                                                                                                                                                                                                                                                                                                                                                                                                                                                                                                                                                                                                                       |  |
|-----|---------------------------------------------------------------------------------------------------------------------------------------------------------------------------------------------------------------------------------------------------------------------------------------------------------------------------------------------------------------------------------------------------------------------------------------------------------------------------------------------------------------------------------------------------------------------------------------------------------------------------------------------------------------------------------------------------------------------------------------------------------------------------------------------------------------------------------------------------------------------------------------------------------------------------------------------------------------------------------------------------------------------------------------------------------------------------------------------------------------------------------------------------------------------------------------------------------------------------------------------------------------------------------------------------------------------------------------|--|
| #29 | practice guideline:pt (Word variations have been searched)                                                                                                                                                                                                                                                                                                                                                                                                                                                                                                                                                                                                                                                                                                                                                                                                                                                                                                                                                                                                                                                                                                                                                                                                                                                                            |  |
| #30 | #26 or #27 or #28 or #29                                                                                                                                                                                                                                                                                                                                                                                                                                                                                                                                                                                                                                                                                                                                                                                                                                                                                                                                                                                                                                                                                                                                                                                                                                                                                                              |  |
| #31 | #4 and #9 and (#10 or #23 or #24) not #25 not #30                                                                                                                                                                                                                                                                                                                                                                                                                                                                                                                                                                                                                                                                                                                                                                                                                                                                                                                                                                                                                                                                                                                                                                                                                                                                                     |  |
|     | [**Error**] ==> #32                                                                                                                                                                                                                                                                                                                                                                                                                                                                                                                                                                                                                                                                                                                                                                                                                                                                                                                                                                                                                                                                                                                                                                                                                                                                                                                   |  |
| #33 | MeSH descriptor: [Diarrhea] explode all trees                                                                                                                                                                                                                                                                                                                                                                                                                                                                                                                                                                                                                                                                                                                                                                                                                                                                                                                                                                                                                                                                                                                                                                                                                                                                                         |  |
| #34 | MeSH descriptor: [Dysentery] explode all trees                                                                                                                                                                                                                                                                                                                                                                                                                                                                                                                                                                                                                                                                                                                                                                                                                                                                                                                                                                                                                                                                                                                                                                                                                                                                                        |  |
| #35 | MeSH descriptor: [Gastroenteritis] explode all trees                                                                                                                                                                                                                                                                                                                                                                                                                                                                                                                                                                                                                                                                                                                                                                                                                                                                                                                                                                                                                                                                                                                                                                                                                                                                                  |  |
| #36 | MeSH descriptor: [Cholera] explode all trees                                                                                                                                                                                                                                                                                                                                                                                                                                                                                                                                                                                                                                                                                                                                                                                                                                                                                                                                                                                                                                                                                                                                                                                                                                                                                          |  |
| #37 | "Diarrhea" or "Diarrheas" or "Diarrheal" or "diarrhoeal" or "diarrhoea" or "diarrhoeas" or "Dysentery" or "dysenteria" or "enteritis" or "enteritides" or "Cholera" or "Choleras" or "vibrio Cholerae" or "gastroenteritis" or "gastroenteritides" or "gastro enteritis" or "gastroduodenitis" or "gastrointestinal acute infection" or "gastrointestinal acute infections" or "gastrointestinal infection" or "gastrointestinal infections" or "digestive tract infection" or "digestive tract infections" or "digestive infection" or "gastrointestinal tract infection" or "gastrointestine tract infection":ti,ab,kw                                                                                                                                                                                                                                                                                                                                                                                                                                                                                                                                                                                                                                                                                                              |  |
| #38 | #33 or #34 or #35 or #36 or #37                                                                                                                                                                                                                                                                                                                                                                                                                                                                                                                                                                                                                                                                                                                                                                                                                                                                                                                                                                                                                                                                                                                                                                                                                                                                                                       |  |
| #39 | "pneumonia" or "pneumonias" or "pneumonitis" or "pulmonary inflammation" or "pulmonary inflammations" or "lung inflammation" or "Lung Inflammations" or "inflammatory lung disease" or "lobitis" or "peripneumonia" or "pleuropneumonia" or "pleuropneumonitis" or "pneumonitis" or "pulmonal inflammation" or "pulmonary inflammation" or "pulmonic inflammation" or "bronchopneumonia" or "bronchopneumonias" or "Respiratory Tract Infections" or "Respiratory Tract Infection" or "Respiratory Infection" or "Respiratory Infections" or "whooping cough" or "pertussis" or "pulmonary tract infection" or "respiration infection" or "Bronchiolitis" or "bronchitis" or "bronchopulmonary infection" or "Croup" or "diphtheria" or "laryngitis" or "Severe Acute Respiratory Syndrome" or "SARS" or "acute chest syndrome" or "acute chest syndromes" or "Acute Lower Respiratory Infection" or "Acute Lower Respiratory Infections" or "ALRI" or "LRI" or "ARI" or "respiration tract infection" or "respiration tract infections" or "legionnaire disease" or "legionnaires' disease" or "legionnaires disease" or "Pontiac fever" or "lung infiltrate" or "lung infiltration" or "pulmonary infiltrate" or "pulmonary infiltration" or "pneumonic lung" or "rds" or "respiratory distress" or "respiration distress":ti,ab,kw |  |
| #40 | MeSH descriptor: [Croup] explode all trees                                                                                                                                                                                                                                                                                                                                                                                                                                                                                                                                                                                                                                                                                                                                                                                                                                                                                                                                                                                                                                                                                                                                                                                                                                                                                            |  |
| #41 | MeSH descriptor: [Pneumonia] explode all trees                                                                                                                                                                                                                                                                                                                                                                                                                                                                                                                                                                                                                                                                                                                                                                                                                                                                                                                                                                                                                                                                                                                                                                                                                                                                                        |  |
| #42 | MeSH descriptor: [Respiratory Tract Infections] explode all trees                                                                                                                                                                                                                                                                                                                                                                                                                                                                                                                                                                                                                                                                                                                                                                                                                                                                                                                                                                                                                                                                                                                                                                                                                                                                     |  |
| #43 | MeSH descriptor: [Severe Acute Respiratory Syndrome] explode all trees                                                                                                                                                                                                                                                                                                                                                                                                                                                                                                                                                                                                                                                                                                                                                                                                                                                                                                                                                                                                                                                                                                                                                                                                                                                                |  |
| #44 | MeSH descriptor: [Acute Chest Syndrome] explode all trees                                                                                                                                                                                                                                                                                                                                                                                                                                                                                                                                                                                                                                                                                                                                                                                                                                                                                                                                                                                                                                                                                                                                                                                                                                                                             |  |
| #45 | #39 or #40 or #41 or #42 or #43 or #44                                                                                                                                                                                                                                                                                                                                                                                                                                                                                                                                                                                                                                                                                                                                                                                                                                                                                                                                                                                                                                                                                                                                                                                                                                                                                                |  |
| #46 | "malaria" or "malarias" or "Plasmodium Infection" or "Plasmodium Infections" or "Plasmodium falciparum" or "Plasmodium falciparums" or "blackwater fever" or "blackwater fevers" or "black water fever" or "black water fevers" or "remittent fever" or "paludism" or "plasmodium infection" or "plasmodium infections" or "marsh fever" or "falciparum infection" or "Plasmodium vivax" or "Plasmodium vivaxs" or "vivax infection" or "Plasmodium ovale" or "Plasmodium ovales" or "Plasmodium malariae":ab,ti,kw                                                                                                                                                                                                                                                                                                                                                                                                                                                                                                                                                                                                                                                                                                                                                                                                                   |  |
| #47 | MeSH descriptor: [Malaria] explode all trees                                                                                                                                                                                                                                                                                                                                                                                                                                                                                                                                                                                                                                                                                                                                                                                                                                                                                                                                                                                                                                                                                                                                                                                                                                                                                          |  |
| #48 | MeSH descriptor: [Plasmodium vivax] explode all trees                                                                                                                                                                                                                                                                                                                                                                                                                                                                                                                                                                                                                                                                                                                                                                                                                                                                                                                                                                                                                                                                                                                                                                                                                                                                                 |  |
| #49 | MeSH descriptor: [Malaria, Vivax] explode all trees                                                                                                                                                                                                                                                                                                                                                                                                                                                                                                                                                                                                                                                                                                                                                                                                                                                                                                                                                                                                                                                                                                                                                                                                                                                                                   |  |
| #50 | MeSH descriptor: [Plasmodium ovale] explode all trees                                                                                                                                                                                                                                                                                                                                                                                                                                                                                                                                                                                                                                                                                                                                                                                                                                                                                                                                                                                                                                                                                                                                                                                                                                                                                 |  |
| #51 | MeSH descriptor: [Plasmodium malariae] explode all trees                                                                                                                                                                                                                                                                                                                                                                                                                                                                                                                                                                                                                                                                                                                                                                                                                                                                                                                                                                                                                                                                                                                                                                                                                                                                              |  |
| #52 | MeSH descriptor: [Malaria, Falciparum] explode all trees                                                                                                                                                                                                                                                                                                                                                                                                                                                                                                                                                                                                                                                                                                                                                                                                                                                                                                                                                                                                                                                                                                                                                                                                                                                                              |  |
| #53 | MeSH descriptor: [Plasmodium falciparum] explode all trees                                                                                                                                                                                                                                                                                                                                                                                                                                                                                                                                                                                                                                                                                                                                                                                                                                                                                                                                                                                                                                                                                                                                                                                                                                                                            |  |
| #54 | #46 or #47 or #48 or #49 or #50 or #51 or #52 or #53                                                                                                                                                                                                                                                                                                                                                                                                                                                                                                                                                                                                                                                                                                                                                                                                                                                                                                                                                                                                                                                                                                                                                                                                                                                                                  |  |
| #55 | MeSH descriptor: [Meningitis] explode all trees                                                                                                                                                                                                                                                                                                                                                                                                                                                                                                                                                                                                                                                                                                                                                                                                                                                                                                                                                                                                                                                                                                                                                                                                                                                                                       |  |
| #56 | MeSH descriptor: [Encephalitis] explode all trees                                                                                                                                                                                                                                                                                                                                                                                                                                                                                                                                                                                                                                                                                                                                                                                                                                                                                                                                                                                                                                                                                                                                                                                                                                                                                     |  |
| #57 | MeSH descriptor: [Meningococcal Infections] explode all trees                                                                                                                                                                                                                                                                                                                                                                                                                                                                                                                                                                                                                                                                                                                                                                                                                                                                                                                                                                                                                                                                                                                                                                                                                                                                         |  |
| #58 | MeSH descriptor: [Neisseria meningitidis] explode all trees                                                                                                                                                                                                                                                                                                                                                                                                                                                                                                                                                                                                                                                                                                                                                                                                                                                                                                                                                                                                                                                                                                                                                                                                                                                                           |  |
| #59 | MeSH descriptor: [Sepsis] explode all trees                                                                                                                                                                                                                                                                                                                                                                                                                                                                                                                                                                                                                                                                                                                                                                                                                                                                                                                                                                                                                                                                                                                                                                                                                                                                                           |  |
| #60 | "Meningitis" or "Meningitides" or "Pachymeningitis" or "Pachymeningitides" or "Arachnoiditis" or "Arachnoiditides" or "Arachnoid Membrane inflammation" or "Arachnoid Membrane inflammations" or "Meningoencephalitides" or "Meningoencephalitis" or "Meningocephalitis" or                                                                                                                                                                                                                                                                                                                                                                                                                                                                                                                                                                                                                                                                                                                                                                                                                                                                                                                                                                                                                                                           |  |

|  |                                                                                                                                                                                                                                                                                                                                                                                                                                                                                                                                                                                                                                                                                                                                                                                                                                                                                                                                                                                                                                                                                                                                                                                                                                                                                                                                                                                                                                                                                                                                                                                                                                                                                                                                                                                                                                                                                                                                                                                                                                                                                                                                                                                                                                                                                                                                                                                                                                                                                                                                                                                                                                                                                                                                                                                                                                                                                                                                                                                                                                                                                                                                                                                                                                                                                                                                                                                                                                                                                                                                                                                                                                                                                                                                                                                                                                                                                                                                                                                                                                                                                                                                                                                                                                                                                                                                                                                                                                                                                                                                                                                                                                                                                                                                                                                                                                                                                                                                                                                                                                                                                 |  |
|--|---------------------------------------------------------------------------------------------------------------------------------------------------------------------------------------------------------------------------------------------------------------------------------------------------------------------------------------------------------------------------------------------------------------------------------------------------------------------------------------------------------------------------------------------------------------------------------------------------------------------------------------------------------------------------------------------------------------------------------------------------------------------------------------------------------------------------------------------------------------------------------------------------------------------------------------------------------------------------------------------------------------------------------------------------------------------------------------------------------------------------------------------------------------------------------------------------------------------------------------------------------------------------------------------------------------------------------------------------------------------------------------------------------------------------------------------------------------------------------------------------------------------------------------------------------------------------------------------------------------------------------------------------------------------------------------------------------------------------------------------------------------------------------------------------------------------------------------------------------------------------------------------------------------------------------------------------------------------------------------------------------------------------------------------------------------------------------------------------------------------------------------------------------------------------------------------------------------------------------------------------------------------------------------------------------------------------------------------------------------------------------------------------------------------------------------------------------------------------------------------------------------------------------------------------------------------------------------------------------------------------------------------------------------------------------------------------------------------------------------------------------------------------------------------------------------------------------------------------------------------------------------------------------------------------------------------------------------------------------------------------------------------------------------------------------------------------------------------------------------------------------------------------------------------------------------------------------------------------------------------------------------------------------------------------------------------------------------------------------------------------------------------------------------------------------------------------------------------------------------------------------------------------------------------------------------------------------------------------------------------------------------------------------------------------------------------------------------------------------------------------------------------------------------------------------------------------------------------------------------------------------------------------------------------------------------------------------------------------------------------------------------------------------------------------------------------------------------------------------------------------------------------------------------------------------------------------------------------------------------------------------------------------------------------------------------------------------------------------------------------------------------------------------------------------------------------------------------------------------------------------------------------------------------------------------------------------------------------------------------------------------------------------------------------------------------------------------------------------------------------------------------------------------------------------------------------------------------------------------------------------------------------------------------------------------------------------------------------------------------------------------------------------------------------------------------------------------|--|
|  | <p>"Cerebromeningitis" or "Encephalomeningitis" or "Encephalomeningitides" or "Haemophilus influenzae" or "Haemophilus parainfluenzae" or "Cerebromeningitides" or "Cerebritis" or "Cerebritides" or "Waterhouse Friderichsen Syndrome" or "Waterhouse Friderichsen Syndrome" or "Waterhouse-Friderichsen Syndrome" or "Waterhouse-Friderichsen Syndrome" or "Purpura Fulminans" or "Meningococcal" or "Meningeal" or "Cerebral Cryptococcosis" or "Cerebral Cryptococcoses" or "Toruloma" or "Torulomas" or "Lymphocytic Choriomeningitis" or "Armstrong Syndrome" or "Armstrong's Syndrome" or "Encephalitis" or "Encephalitides" or "encephalitis" or "brain inflammation" or "brain inflammations" or "Rasmussen syndrome" or "Rasmussen's syndrome" or "Cerebral Ventriculitis" or "Cerebral Ventriculitides" or "Infectious Ventriculitis" or "Infectious Ventriculitides" or "Encephalomyelitis" or "Meningoencephalitides" or "Meningoencephalitis" or "Cerebromeningitis" or "myeloencephalitis" or "Lupus Vasculitis" or "Central Nervous System Lupus" or "Lupus Erythematosus" or "Lupus Erythematosus" or "brain vasculitis" or "brain angiitis" or "brain arteritis" or "cerebral arteritis" or "cerebral vasculitis" or "Neisseria meningitidis" or "Neisseria meningitides" or "Micrococcus intracellularis" or "Neisseria weichselbaumi" or "Meningococcus" or "meningococemia" or "meningococci" or "meningococcal" or "meningococcaemia" or "sepsis" or "Pyemia" or "Pyemias" or "Pyohemia" or "Pyohemias" or "Pyoemia" or "Pyoemias" or "Septicemia" or "Septicemias" or "Blood Poisoning" or "Blood Poisonings" or "septic" or "sepsis":ti,ab,kw</p> <p>#61 #55 or #56 or #57 or #58 or #59 or #60</p> <p>#62 MeSH descriptor: [Congenital Abnormalities] explode all trees</p> <p>#63 MeSH descriptor: [Sudden Infant Death] explode all trees</p> <p>#64 MeSH descriptor: [Neural Tube Defects] explode all trees</p> <p>#65 MeSH descriptor: [Fetal Alcohol Spectrum Disorders] explode all trees</p> <p>#66 "congenital" or "Deformities" or "Deformity" or "Birth Defects" or "Birth Defect" or "abnormality" or "abnormalities" or "malformation" or "malformations" or "malformative" or "malformed" or "neural tube" or "Craniorachischisis" or "Craniorachischises" or "Diastematomyelia" or "Diastematomyelias" or "Tethered Cord" or "Spinal Dysraphism" or "Tethered Spinal Cord" or "Spinal Dysraphisms" or "Iniencephaly" or "Iniencephalies" or "Neurenteric" or "Neuroenteric" or "Spinal Cord Myelodysplasia" or "Spinal Cord Myelodysplasias" or "Acrania" or "Acranias" or "Exencephaly" or "Exencephalies" or "dysraphia" or "dysraphic" or "dysraphism" or "dysraphy" or "NTD" or "NTDS" or "sudden infant death" or "sid" or "SIDS" or "cot death" or "cot deaths" or "crib death" or "Fetal alcohol spectrum" or "Foetal alcohol spectrum" or "FASD" or "FASDs" or "Fetal Alcohol Syndrome" or "Alcohol-Related Birth Defects" or "Alcohol Related Birth Defects" or "Alcohol Related Neurodevelopmental Disorder" or "FAE" or "Fetal Alcohol Effects" or "FAEs" or "Fetal Alcohol Syndrome" or "Fetus Alcohol Syndrome" or "Foetal alcohol syndrome":ti,ab,kw</p> <p>#67 #62 or #63 or #64 or #65 or #66</p> <p>#68 MeSH descriptor: [Premature Birth] explode all trees</p> <p>#69 "premature" or "preterm" or "pre-mature" or "pre-term" or "prematurity" or "prematurnitas":ti,ab,kw</p> <p>#70 #68 or #69</p> <p>#71 MeSH descriptor: [Asphyxia] explode all trees</p> <p>#72 MeSH descriptor: [Asphyxia Neonatorum] explode all trees</p> <p>#73 "asphyxia" or "Asphyxia Neonatorum" or "hypoxia" or "Asphyxias" or "Suffocation" or "Suffocations" or "anoxia" or ("intrapartum" and "related"):ti,ab,kw</p> <p>#74 #71 or #72 or #73</p> <p>#75 MeSH descriptor: [Tetanus] explode all trees</p> <p>#76 "tetanus" or "tetani" or "diphtheria-tetanus-pertussis":ti,ab,kw</p> <p>#77 #75 or #76</p> <p>#78 MeSH descriptor: [Rubella] explode all trees</p> <p>#79 MeSH descriptor: [Necrosis] explode all trees</p> <p>#80 MeSH descriptor: [Birth Injuries] explode all trees</p> <p>#81 MeSH descriptor: [Jaundice] explode all trees</p> <p>#82 MeSH descriptor: [Hemorrhage] explode all trees</p> <p>#83 "rubella" or "measles" or "epidemic roseola" or "necrosis" or "necrotic" or "necroses" or "necrotizing" or "Infarction" or "infractions" or "birth injuries" or "birth injury" or "birth trauma" or "Obstetric Paralyzes" or "Obstetric Paralysis" or "Obstetrical Paralyzes" or "Obstetrical Paralysis" or "birth damage" or "birth lesion" or "birth palsy" or "birth paralysis" or "obstetric palsy" or "obstetrical palsy" or "brachial palsy" or "brachial paralysis" or "brachial plexus paralysis" or "delivery trauma" or "arm paralysis" or "paralysis brachialis" or "jaundice" or "jaundices" or "Icterus" or "bronze baby syndrome" or "erythroleukoblastosis" or "hemorrhage" or "haemorrhage" or "haemorrhagic" or "Hemorrhagic":ti,ab,kw</p> <p>#84 #78 or #79 or #80 or #81 or #82 or #83</p> |  |
|--|---------------------------------------------------------------------------------------------------------------------------------------------------------------------------------------------------------------------------------------------------------------------------------------------------------------------------------------------------------------------------------------------------------------------------------------------------------------------------------------------------------------------------------------------------------------------------------------------------------------------------------------------------------------------------------------------------------------------------------------------------------------------------------------------------------------------------------------------------------------------------------------------------------------------------------------------------------------------------------------------------------------------------------------------------------------------------------------------------------------------------------------------------------------------------------------------------------------------------------------------------------------------------------------------------------------------------------------------------------------------------------------------------------------------------------------------------------------------------------------------------------------------------------------------------------------------------------------------------------------------------------------------------------------------------------------------------------------------------------------------------------------------------------------------------------------------------------------------------------------------------------------------------------------------------------------------------------------------------------------------------------------------------------------------------------------------------------------------------------------------------------------------------------------------------------------------------------------------------------------------------------------------------------------------------------------------------------------------------------------------------------------------------------------------------------------------------------------------------------------------------------------------------------------------------------------------------------------------------------------------------------------------------------------------------------------------------------------------------------------------------------------------------------------------------------------------------------------------------------------------------------------------------------------------------------------------------------------------------------------------------------------------------------------------------------------------------------------------------------------------------------------------------------------------------------------------------------------------------------------------------------------------------------------------------------------------------------------------------------------------------------------------------------------------------------------------------------------------------------------------------------------------------------------------------------------------------------------------------------------------------------------------------------------------------------------------------------------------------------------------------------------------------------------------------------------------------------------------------------------------------------------------------------------------------------------------------------------------------------------------------------------------------------------------------------------------------------------------------------------------------------------------------------------------------------------------------------------------------------------------------------------------------------------------------------------------------------------------------------------------------------------------------------------------------------------------------------------------------------------------------------------------------------------------------------------------------------------------------------------------------------------------------------------------------------------------------------------------------------------------------------------------------------------------------------------------------------------------------------------------------------------------------------------------------------------------------------------------------------------------------------------------------------------------------------------------------------|--|



|        |                                                                                                                                                                                                                                                                                                                                                                                                                                                                                                                                                                                                                                                                                                                                                                                                                                                                                                                                                                                                                                                                                                                                                                                                                                                                                                                                                                                                                                                                                                                                                                                                                                                                                                                                                                                                                                                                                                                                                                                                                                                                                                                                                                                                                                                                                                                                                                                                                                                                                                                                                                                                                                                                                                                                                                                                                                                                                                                                                                                                                                                                                                                                                                                                                                                                                                                                                                                                                                                                                                                                                                                                                                                                                                                                                                                                                                                                                                                                                                                                                                                                                                                                                                                                                                                                                                                                                                                                                                                                             |                  |
|--------|-----------------------------------------------------------------------------------------------------------------------------------------------------------------------------------------------------------------------------------------------------------------------------------------------------------------------------------------------------------------------------------------------------------------------------------------------------------------------------------------------------------------------------------------------------------------------------------------------------------------------------------------------------------------------------------------------------------------------------------------------------------------------------------------------------------------------------------------------------------------------------------------------------------------------------------------------------------------------------------------------------------------------------------------------------------------------------------------------------------------------------------------------------------------------------------------------------------------------------------------------------------------------------------------------------------------------------------------------------------------------------------------------------------------------------------------------------------------------------------------------------------------------------------------------------------------------------------------------------------------------------------------------------------------------------------------------------------------------------------------------------------------------------------------------------------------------------------------------------------------------------------------------------------------------------------------------------------------------------------------------------------------------------------------------------------------------------------------------------------------------------------------------------------------------------------------------------------------------------------------------------------------------------------------------------------------------------------------------------------------------------------------------------------------------------------------------------------------------------------------------------------------------------------------------------------------------------------------------------------------------------------------------------------------------------------------------------------------------------------------------------------------------------------------------------------------------------------------------------------------------------------------------------------------------------------------------------------------------------------------------------------------------------------------------------------------------------------------------------------------------------------------------------------------------------------------------------------------------------------------------------------------------------------------------------------------------------------------------------------------------------------------------------------------------------------------------------------------------------------------------------------------------------------------------------------------------------------------------------------------------------------------------------------------------------------------------------------------------------------------------------------------------------------------------------------------------------------------------------------------------------------------------------------------------------------------------------------------------------------------------------------------------------------------------------------------------------------------------------------------------------------------------------------------------------------------------------------------------------------------------------------------------------------------------------------------------------------------------------------------------------------------------------------------------------------------------------------------------------|------------------|
|        | <p>#85 MeSH descriptor: [Nutrition Disorders] explode all trees</p> <p>#86 "malnutrition" or "Nutritional" or "Undernutrition" or "Malnourishment" or "Malnourishments" or "Deficiency" or "Deficiencies" or "Refeeding Syndrome" or "Starvation" or "Starvations" or "Famine" or "Famines" or "deficient" or "underfeeding" or "undernourishment" or "nutrition" or "Hypervitaminosis":ti,ab,kw</p> <p>#87 #85 or #86</p> <p>#88 MeSH descriptor: [Noncommunicable Diseases] explode all trees</p> <p>#89 MeSH descriptor: [Communicable Diseases] explode all trees</p> <p>#90 MeSH descriptor: [Infant, Newborn, Diseases] explode all trees</p> <p>#91 "Noncommunicable" or "Non-communicable" or "communicable" or "non-infectious" or "infectious" or "noninfectious" or "newborn" or "neonatal" or "perinatal":ti,ab,kw</p> <p>#92 #88 or #89 or #90 or #91</p> <p>#93 (#38 or #44 or #54 or #61 or #67 or #70 or #74 or #77 or #84 or #87 or #92)</p> <p>#94 #31 and #93 Publication Year from 2015 to 2017</p>                                                                                                                                                                                                                                                                                                                                                                                                                                                                                                                                                                                                                                                                                                                                                                                                                                                                                                                                                                                                                                                                                                                                                                                                                                                                                                                                                                                                                                                                                                                                                                                                                                                                                                                                                                                                                                                                                                                                                                                                                                                                                                                                                                                                                                                                                                                                                                                                                                                                                                                                                                                                                                                                                                                                                                                                                                                                                                                                                                                                                                                                                                                                                                                                                                                                                                                                                                                                                                                     |                  |
| Scopus | <p>(( TITLE-ABS-KEY ( "Infant" OR "Infant, Newborn" OR "child" OR "Child, Preschool" OR "Minors" OR "infant" OR "infants" OR "neonate" OR "neonates" OR "neonatal" OR "newborn" OR "newborns" OR "new-born" OR "new-borns" OR "baby" OR "babies" OR "Premature" OR "preterm" OR "pre term" OR "child" OR "children" OR "youth" OR "youths" OR "young people" OR "childhood" OR "toddler" OR "toddlers" OR "kid" OR "kids" OR "young patient" OR "young patients" OR "boy" OR "boys" OR "girl" OR "girls" OR "young age" OR "pediatric" OR "pre-schooler" OR "preschooler" OR "under 5" OR "under five" OR "under fives" OR "less than five" OR "perinatal" ) )</p> <p>AND</p> <p>(( TITLE-ABS-KEY ( "Mortality" OR "Mortality" OR "Mortalities" OR "fatal" OR "fatality" OR "fatalities" OR "Death" OR "death" OR "deaths" OR "Child Mortality" ) )</p> <p>AND</p> <p>(( TITLE-ABS-KEY ( "Diarrhea" OR "Diarrhea" OR "Diarrheas" OR "Diarrheal" OR "diarrhoeal" OR "diarrhoea" OR "diarrhoeas" OR "Dysentery" OR "Dysentery" OR "dysentery" OR "enteritis" OR "enteritides" OR "Cholera" OR "Cholera" OR "Choleras" OR "vibrio Cholerae" OR "Gastroenteritis" OR "gastroenteritis" OR "gastroenteritides" OR "gastro enteritis" OR "gastroduodenitis" OR "gastrointestinal acute infection" OR "gastrointestinal acute infections" OR "gastrointestinal infection" OR "gastrointestinal infections" OR "digestive tract infection" OR "digestive tract infections" OR "digestive infection" OR "gastrointestinal tract infection" OR "gastrointestine tract infection" ) OR TITLE-ABS-KEY ( "Pneumonia" OR "pneumonia" OR "pneumonias" OR "pneumonitis" OR "pulmonary inflammation" OR "pulmonary inflammations" OR "lung inflammation" OR "Lung Inflammations" OR "inflammatory lung disease" OR "lobitis" OR "peripneumonia" OR "pleuropneumonia" OR "pleuropneumonitis" OR "pneumonitis" OR "pulmonal inflammation" OR "pulmonary inflammation" OR "pulmonic inflammation" OR "bronchopneumonia" OR "bronchopneumonias" OR "Respiratory Tract Infections" OR "Respiratory Tract Infections" OR "Respiratory Tract Infection" OR "Respiratory Infection" OR "Respiratory Infections" OR "whooping cough" OR "pertussis" OR "pulmonary tract infection" OR "respiration infection" OR "Bronchiolitis" OR "bronchitis" OR "bronchopulmonary infection" OR "Croup" OR "Croup" OR "diphtheria" OR "laryngitis" OR "Severe Acute Respiratory Syndrome" OR "Severe Acute Respiratory Syndrome" OR "SARS" OR "Acute Chest Syndrome" OR "acute chest syndrome" OR "acute chest syndromes" OR "Acute Lower Respiratory Infection" OR "Acute Lower Respiratory Infections" OR "ALRI" OR "LRI" OR "ARI" OR "respiration tract infection" OR "respiration tract infections" OR "legionnaire disease" OR "legionnaires disease" OR "legionnaires disease" OR "Pontiac fever" OR "lung infiltrate" OR "lung infiltration" OR "pulmonary infiltrate" OR "pulmonary infiltration" OR "pneumonic lung" OR "rds" OR "respiratory distress" OR "respiration distress" ) OR TITLE-ABS-KEY ( "Malaria" OR "malaria" OR "malarias" OR "Plasmodium Infection" OR "Plasmodium Infections" OR "Plasmodium falciparum" OR "Plasmodium falciparum" OR "Plasmodium falciparums" OR "malaria, falciparum" OR "blackwater fever" OR "blackwater fevers" OR "black water fever" OR "black water fevers" OR "remittent fever" OR "paludism" OR "plasmodium infection" OR "plasmodium infections" OR "marsh fever" OR "falciparum infection" OR "Plasmodium vivax" OR "Plasmodium vivax" OR "Plasmodium vivax" OR "malaria, vivax" OR "vivax infection" OR "Plasmodium ovale" OR "Plasmodium ovale" OR "Plasmodium ovales" OR "Plasmodium malariae" OR "Plasmodium malariae" ) OR TITLE-ABS-KEY ( "Meningitis" OR "Meningitis" OR "Meningitides" OR "Pachymeningitis" OR "Pachymeningitides" OR "Arachnoiditis" OR "Arachnoiditides" OR "Arachnoid Membrane inflammation" OR "Arachnoid Membrane inflammations" OR "Meningoencephalitis" OR "Meningoencephalitis" OR "Meningocephalitis" OR "Cerebromeningitis" OR "Encephalomeningitis" OR "Encephalomeningitides" OR "Haemophilus influenzae" OR "Haemophilus parainfluenzae" OR "Cerebromeningitides" OR "Cerebritis" OR "Cerebritides" OR "Waterhouse Friderichsen Syndrome" OR "Waterhouse Friderichsen Syndrome" OR "Waterhouse-Friederichsen Syndrome" OR "Purpura Fulminans" OR "Meningococcal" OR "Meningeal" OR "Cerebral Cryptococcosis" OR</p> | January 14, 2018 |

|                                                                                                                                                                                                                                                                                                                                                                                                                                                                                                                                                                                                                                                                                                                                                                                                                                                                                                                                                                                                                                                                                                                                                                                                                                                                                                                                                                                                                                                                                                                                                                                                                                                                                                                                                                                                                                                                                                                                                                                                                                                                                                                                                                                                                                                                                                                                                                                                                                                                                                                                                                                                                                                                                                                                                                                                                                                                                                                                                                                                                                                                                                                                                                                                                                                                                                                                                                                                                                                                                                                                                                                                                                                                                                                                                                                                                                                                                                                                                                                                                                                                                                                                                                                                                                                                                                                                                                                                                                                                                                                                                                                                                                                                                                                                                                                                                                                                                                                                                                                                                                                                                                                                                                                                                                                                                                                                                                                                                                                                                                                                                                                                                                                                                                                                                                                                                                                                                                                                                                                                                                                                                                                                                                                                                                                                                                                                                                                                                                                                                                                            |
|----------------------------------------------------------------------------------------------------------------------------------------------------------------------------------------------------------------------------------------------------------------------------------------------------------------------------------------------------------------------------------------------------------------------------------------------------------------------------------------------------------------------------------------------------------------------------------------------------------------------------------------------------------------------------------------------------------------------------------------------------------------------------------------------------------------------------------------------------------------------------------------------------------------------------------------------------------------------------------------------------------------------------------------------------------------------------------------------------------------------------------------------------------------------------------------------------------------------------------------------------------------------------------------------------------------------------------------------------------------------------------------------------------------------------------------------------------------------------------------------------------------------------------------------------------------------------------------------------------------------------------------------------------------------------------------------------------------------------------------------------------------------------------------------------------------------------------------------------------------------------------------------------------------------------------------------------------------------------------------------------------------------------------------------------------------------------------------------------------------------------------------------------------------------------------------------------------------------------------------------------------------------------------------------------------------------------------------------------------------------------------------------------------------------------------------------------------------------------------------------------------------------------------------------------------------------------------------------------------------------------------------------------------------------------------------------------------------------------------------------------------------------------------------------------------------------------------------------------------------------------------------------------------------------------------------------------------------------------------------------------------------------------------------------------------------------------------------------------------------------------------------------------------------------------------------------------------------------------------------------------------------------------------------------------------------------------------------------------------------------------------------------------------------------------------------------------------------------------------------------------------------------------------------------------------------------------------------------------------------------------------------------------------------------------------------------------------------------------------------------------------------------------------------------------------------------------------------------------------------------------------------------------------------------------------------------------------------------------------------------------------------------------------------------------------------------------------------------------------------------------------------------------------------------------------------------------------------------------------------------------------------------------------------------------------------------------------------------------------------------------------------------------------------------------------------------------------------------------------------------------------------------------------------------------------------------------------------------------------------------------------------------------------------------------------------------------------------------------------------------------------------------------------------------------------------------------------------------------------------------------------------------------------------------------------------------------------------------------------------------------------------------------------------------------------------------------------------------------------------------------------------------------------------------------------------------------------------------------------------------------------------------------------------------------------------------------------------------------------------------------------------------------------------------------------------------------------------------------------------------------------------------------------------------------------------------------------------------------------------------------------------------------------------------------------------------------------------------------------------------------------------------------------------------------------------------------------------------------------------------------------------------------------------------------------------------------------------------------------------------------------------------------------------------------------------------------------------------------------------------------------------------------------------------------------------------------------------------------------------------------------------------------------------------------------------------------------------------------------------------------------------------------------------------------------------------------------------------------------------------------------------------------|
| <p>"Cerebral Cryptococcoses" OR "Toruloma" OR "Torulomas" OR "Lymphocytic Choriomeningitis" OR "Armstrong Syndrome" OR "Armstrong's Syndrome" OR "Encephalitis" OR "Encephalitis" OR "Encephalitis" OR "encephalitis" OR "brain inflammation" OR "brain inflammations" OR "Rasmussen syndrome" OR "Rasmussen's syndrome" OR "Cerebral Ventriculitis" OR "Cerebral Ventriculitides" OR "Infectious Ventriculitis" OR "Infectious Ventriculitides" OR "Encephalomyelitis" OR "Meningoencephalitis" OR "Meningoencephalitis" OR "Cerebromeningitis" OR "myeloencephalitis" OR "Lupus Vasculitis" OR "Central Nervous System Lupus" OR "Lupus Erythematosus" OR "Lupus Erythematosus" OR "brain vasculitis" OR "brain angiitis" OR "brain arteritis" OR "cerebral arteritis" OR "cerebral vasculitis" OR "Neisseria meningitidis" OR "Neisseria meningitidis" OR "Neisseria meningitides" OR "Micrococcus intracellularis" OR "Neisseria weichselbaumi" OR "Meningococcus" OR "meningococemia" OR "meningococci" OR "Meningococcal Infections" OR "meningococcal" OR "meningococcaemia" OR "sepsis" OR "sepsis" OR "Pyemia" OR "Pyemias" OR "Pyohemia" OR "Pyohemias" OR "Pyemia" OR "Pyemias" OR "Septicemia" OR "Septicemias" OR "Blood Poisoning" OR "Blood Poisonings" OR "septic" OR "sepsis" ) OR TITLE-ABS-KEY ( "congenital abnormalities" OR "congenital" OR "Deformities" OR "Deformity" OR "Birth Defects" OR "Birth Defect" OR "abnormality" OR "abnormalities" OR "malformation" OR "malformations" OR "malformative" OR "malformed" OR "neural tube defects" OR "neural tube" OR "Craniorachischisis" OR "Craniorachischises" OR "Diastematomyelia" OR "Diastematomyelias" OR "Tethered Cord" OR "Spinal Dysraphism" OR "Tethered Spinal Cord" OR "Spinal Dysraphisms" OR "Iniencephaly" OR "Iniencephalies" OR "Neurenteric" OR "Neuroenteric" OR "Spinal Cord Myelodysplasia" OR "Spinal Cord Myelodysplasias" OR "Acrania" OR "Acranias" OR "Exencephaly" OR "Exencephalies" OR "dysgraphia" OR "dysraphic" OR "dysraphism" OR "dysraphy" OR "NTD" OR "NTDS" OR "sudden infant death syndrome" OR "sudden infant death" OR "sid" OR "SIDS" OR "cot death" OR "cot deaths" OR "crib death" OR "fetal alcohol spectrum disorders" OR "Fetal alcohol spectrum" OR "Foetal alcohol spectrum" OR "FASD" OR "FASDs" OR "Fetal Alcohol Syndrome" OR "Alcohol-Related Birth Defects" OR "Alcohol Related Birth Defects" OR "Alcohol Related Neurodevelopmental Disorder" OR "FAE" OR "Fetal Alcohol Effects" OR "FAEs" OR "Fetal Alcohol Syndrome" OR "Fetus Alcohol Syndrome" OR "Foetal alcohol syndrome" ) OR TITLE-ABS-KEY ( "premature birth" OR "premature" OR "preterm" OR "pre-mature" OR "pre-term" OR "prematurity" OR "prematunitas" ) OR TITLE-ABS-KEY ( "asphyxia" OR "asphyxia" OR "Asphyxia Neonatorum" OR "Asphyxia Neonatorum" OR "hypoxia" OR "Asphyxias" OR "Suffocation" OR "Suffocations" OR "anoxia" OR ( "intrapartum" AND "related" ) ) OR TITLE-ABS-KEY ( "tetanus" OR "tetanus" OR "tetani" OR "diphtheria-tetanus-pertussis" ) OR TITLE-ABS-KEY ( "rubella" OR "rubella" OR "measles" OR "epidemic roseola" OR "necrosis" OR "necrosis" OR "necrotic" OR "necroses" OR "necrotizing" OR "Infarction" OR "infarctions" OR "birth injuries" OR "birth injuries" OR "birth injury" OR "birth trauma" OR "Obstetric Paralyzes" OR "Obstetric Paralysis" OR "Obstetrical Paralyzes" OR "Obstetrical Paralysis" OR "birth damage" OR "birth lesion" OR "birth palsy" OR "birth paralysis" OR "obstetric palsy" OR "obstetrical palsy" OR "brachial palsy" OR "brachial paralysis" OR "brachial plexus paralysis" OR "delivery trauma" OR "arm paralysis" OR "paralysis brachialis" OR "jaundice" OR "jaundice" OR "jaundices" OR "Icterus" OR "bronze baby syndrome" OR "erythroleukoblastosis" OR "hemorrhage" OR "hemorrhage" OR "haemorrhage" OR "haemorrhagic" OR "Hemorrhagic" ) OR TITLE-ABS-KEY ( "Nutrition disorders" OR "malnutrition" OR "Nutritional" OR "Undernutrition" OR "Malnourishment" OR "Malnourishments" OR "Deficiency" OR "Deficiencies" OR "Refeeding Syndrome" OR "Starvation" OR "Starvations" OR "Famine" OR "Famines" OR "deficient" OR "underfeeding" OR "undernourishment" OR "nutrition" OR "Hypervitaminosis" ) OR TITLE-ABS-KEY ( "Noncommunicable Diseases" OR "Noncommunicable" OR "Non-communicable" OR "communicable" OR "non-infectious" OR "infectious" OR "noninfectious" OR "Communicable Diseases" OR "Infant, Newborn, Diseases" OR "newborn" OR "neonatal" OR "perinatal" ) ) AND ( ( TITLE-ABS-KEY ( "Argentina" OR "Bolivia" OR "Brazil" OR "Brasil" OR "Chile" OR "Colombia" OR "Ecuador" OR "French Guiana" OR "Guyana" OR "Paraguay" OR "Peru" OR "Suriname" OR "Uruguay" OR "Venezuela" OR "Mexico" OR "Belize" OR "Costa Rica" OR "El Salvador" OR "Guatemala" OR "Honduras" OR "Nicaragua" OR "Puerto Rico" OR "Panama" OR "West Indies" OR "Antigua" OR "Barbuda" OR "Bahamas" OR "Barbados" OR "Cuba" OR "Dominica" OR "Dominican Republic" OR "Grenada" OR "Guadeloupe" OR "Haiti" OR "Jamaica" OR "Martinique" OR "Antilles" OR "Anguilla" OR "Saint Kitts" OR "St Kitts" OR "Saint Lucia" OR "St Lucia" OR "Saint Vincent" OR "St Vincent" OR "Trinidad" OR "Tobago" OR "Virgin Islands" OR "Kazakhstan" OR "Kyrgyzstan" OR "Tajikistan" OR "Turkmenistan" OR "Uzbekistan" OR "Borneo" OR "Brunei" OR "Cambodia" OR "East Timor" OR "Indonesia" OR "Laos" OR "Malaysia" OR "Mekong Valley" OR "Myanmar" OR "Burma" OR "Philippines" OR "Singapore" OR "Thailand" OR "Vietnam" OR "Bangladesh" OR "Bhutan" OR "India" OR "Nepal" OR "Pakistan" OR "Sri Lanka" OR "China" OR "Korea" OR "Macao" OR "Macau" OR "Mongolia" OR "Taiwan" OR "Afghanistan" OR "Bahrain" OR "Iran" OR "Iraq" OR "Israel" OR "Jordan" OR "Kuwait" OR "Lebanon" OR "Oman" OR "Qatar" OR "Saudi Arabia" OR "Syria" OR "Turkey" OR "United Arab Emirates" OR "Yemen" OR "Fiji" OR "New Caledonia" OR "Papua New Guinea" OR "Vanuatu" OR "Micronesia" OR "Melanesia" OR "Guam" OR "Palau" OR "Polynesia" OR "Samoa" OR "Tonga" OR "Armenia" OR "Azerbaijan" OR "Georgia" OR "Albania" OR "Estonia" OR "Latvia" OR "Lithuania" OR "Bosnia" OR "Herzegovina" OR "Serbia" OR "Bulgaria" OR "Belarus" OR "Croatia" OR "Czech Republic" OR "Hungary" OR "Macedonia" OR "Moldova" OR "Montenegro" OR "Poland" OR "Romania" OR "Russia" OR "Bashkiria" OR "Dagestan" OR "Slovakia" OR "Slovenia" OR "Ukraine" OR "Cameroon" OR "Central African Republic" OR "Chad" OR</p> |
|----------------------------------------------------------------------------------------------------------------------------------------------------------------------------------------------------------------------------------------------------------------------------------------------------------------------------------------------------------------------------------------------------------------------------------------------------------------------------------------------------------------------------------------------------------------------------------------------------------------------------------------------------------------------------------------------------------------------------------------------------------------------------------------------------------------------------------------------------------------------------------------------------------------------------------------------------------------------------------------------------------------------------------------------------------------------------------------------------------------------------------------------------------------------------------------------------------------------------------------------------------------------------------------------------------------------------------------------------------------------------------------------------------------------------------------------------------------------------------------------------------------------------------------------------------------------------------------------------------------------------------------------------------------------------------------------------------------------------------------------------------------------------------------------------------------------------------------------------------------------------------------------------------------------------------------------------------------------------------------------------------------------------------------------------------------------------------------------------------------------------------------------------------------------------------------------------------------------------------------------------------------------------------------------------------------------------------------------------------------------------------------------------------------------------------------------------------------------------------------------------------------------------------------------------------------------------------------------------------------------------------------------------------------------------------------------------------------------------------------------------------------------------------------------------------------------------------------------------------------------------------------------------------------------------------------------------------------------------------------------------------------------------------------------------------------------------------------------------------------------------------------------------------------------------------------------------------------------------------------------------------------------------------------------------------------------------------------------------------------------------------------------------------------------------------------------------------------------------------------------------------------------------------------------------------------------------------------------------------------------------------------------------------------------------------------------------------------------------------------------------------------------------------------------------------------------------------------------------------------------------------------------------------------------------------------------------------------------------------------------------------------------------------------------------------------------------------------------------------------------------------------------------------------------------------------------------------------------------------------------------------------------------------------------------------------------------------------------------------------------------------------------------------------------------------------------------------------------------------------------------------------------------------------------------------------------------------------------------------------------------------------------------------------------------------------------------------------------------------------------------------------------------------------------------------------------------------------------------------------------------------------------------------------------------------------------------------------------------------------------------------------------------------------------------------------------------------------------------------------------------------------------------------------------------------------------------------------------------------------------------------------------------------------------------------------------------------------------------------------------------------------------------------------------------------------------------------------------------------------------------------------------------------------------------------------------------------------------------------------------------------------------------------------------------------------------------------------------------------------------------------------------------------------------------------------------------------------------------------------------------------------------------------------------------------------------------------------------------------------------------------------------------------------------------------------------------------------------------------------------------------------------------------------------------------------------------------------------------------------------------------------------------------------------------------------------------------------------------------------------------------------------------------------------------------------------------------------------------------------------------------------------------|



|         |                                                                                                                                                                                                                                                                                                                                                                                                                                                                                                                                                                                                                                                                                                                                                                                                                                                                                                                                                                                                                                                                                                                                                                                                                                                                                                                                                                                                                                                                                                                                                                                                                                                                                                                                                                                                                                                                                                                                                                                                                                                                                                                                                                                                                                                                                                                                                                                                                                                                                                                                                                                                                                                                                                                                                                                                                                                                                                                                                                                                                                                                                                                                                                                                                                                                                                                                                                                                                                                                                                                                                                                                                                                                                                                                                                                                                                                                                                                                                                                                                                                                                                                                                                                                                                                                                                                                                                                                                                                                                                                                                                                                                                                                                                                                                                                                                                                                                                                                                                                                                                                                                                                                                                                                                                                                                                                                                                                                                                                                                                                                                                                                                                                                                                                                                                                                                                                                                                                                                                                                                                                                                                                                                                                                                                                                                                                                                                                                                                                                                                                                                                                                                                                               |                  |
|---------|---------------------------------------------------------------------------------------------------------------------------------------------------------------------------------------------------------------------------------------------------------------------------------------------------------------------------------------------------------------------------------------------------------------------------------------------------------------------------------------------------------------------------------------------------------------------------------------------------------------------------------------------------------------------------------------------------------------------------------------------------------------------------------------------------------------------------------------------------------------------------------------------------------------------------------------------------------------------------------------------------------------------------------------------------------------------------------------------------------------------------------------------------------------------------------------------------------------------------------------------------------------------------------------------------------------------------------------------------------------------------------------------------------------------------------------------------------------------------------------------------------------------------------------------------------------------------------------------------------------------------------------------------------------------------------------------------------------------------------------------------------------------------------------------------------------------------------------------------------------------------------------------------------------------------------------------------------------------------------------------------------------------------------------------------------------------------------------------------------------------------------------------------------------------------------------------------------------------------------------------------------------------------------------------------------------------------------------------------------------------------------------------------------------------------------------------------------------------------------------------------------------------------------------------------------------------------------------------------------------------------------------------------------------------------------------------------------------------------------------------------------------------------------------------------------------------------------------------------------------------------------------------------------------------------------------------------------------------------------------------------------------------------------------------------------------------------------------------------------------------------------------------------------------------------------------------------------------------------------------------------------------------------------------------------------------------------------------------------------------------------------------------------------------------------------------------------------------------------------------------------------------------------------------------------------------------------------------------------------------------------------------------------------------------------------------------------------------------------------------------------------------------------------------------------------------------------------------------------------------------------------------------------------------------------------------------------------------------------------------------------------------------------------------------------------------------------------------------------------------------------------------------------------------------------------------------------------------------------------------------------------------------------------------------------------------------------------------------------------------------------------------------------------------------------------------------------------------------------------------------------------------------------------------------------------------------------------------------------------------------------------------------------------------------------------------------------------------------------------------------------------------------------------------------------------------------------------------------------------------------------------------------------------------------------------------------------------------------------------------------------------------------------------------------------------------------------------------------------------------------------------------------------------------------------------------------------------------------------------------------------------------------------------------------------------------------------------------------------------------------------------------------------------------------------------------------------------------------------------------------------------------------------------------------------------------------------------------------------------------------------------------------------------------------------------------------------------------------------------------------------------------------------------------------------------------------------------------------------------------------------------------------------------------------------------------------------------------------------------------------------------------------------------------------------------------------------------------------------------------------------------------------------------------------------------------------------------------------------------------------------------------------------------------------------------------------------------------------------------------------------------------------------------------------------------------------------------------------------------------------------------------------------------------------------------------------------------------------------------------------------------------------------------------|------------------|
| Popline | <p>(( ( "Infant" OR "Infant, Newborn" OR "child" OR "Child, Preschool" OR "Minors" OR "infant" OR "infants" OR "neonate" OR "neonates" OR "neonatal" OR "newborn" OR "newborns" OR "new\born" OR "new\borns" OR "baby" OR "babies" OR "Premature" OR "preterm" OR "pre term" OR "child" OR "children" OR "youth" OR "youths" OR "young people" OR "childhood" OR "toddler" OR "toddlers" OR "kid" OR "kids" OR "young patient" OR "young patients" OR "boy" OR "boys" OR "girl" OR "girls" OR "young age" OR "pediatric" OR "pre\schooler" OR "preschooler" OR "under 5" OR "under five" OR "under fives" OR "less than five" OR "perinatal" )))</p> <p>AND</p> <p>(( ( "Mortality" OR "Mortalities" OR "fatal" OR "fatality" OR "fatalities" OR "death" OR "deaths" )))</p> <p>AND</p> <p>(( ( "Diarrhea" OR "Diarrhea" OR "Diarrheas" OR "Diarrheal" OR "diarrhoeal" OR "diarrhoea" OR "diarrhoeas" OR "Dysentery" OR "Dysentery" OR "dysentery" OR "enteritis" OR "enteritides" OR "Cholera" OR "Cholera" OR "Choleras" OR "vibrio Cholerae" OR "Gastroenteritis" OR "gastroenteritis" OR "gastroenteritides" OR "gastro enteritis" OR "gastroduodenitis" OR "gastrointestinal acute infection" OR "gastrointestinal acute infections" OR "gastrointestinal infection" OR "gastrointestinal infections" OR "digestive tract infection" OR "digestive tract infections" OR "digestive infection" OR "gastrointestinal tract infection" OR "gastrointestine tract infection" OR "Pneumonia" OR "pneumonia" OR "pneumonias" OR "pneumonitis" OR "pulmonary inflammation" OR "pulmonary inflammations" OR "lung inflammation" OR "Lung Inflammations" OR "inflammatory lung disease" OR "lobitis" OR "peripneumonia" OR "pleuropneumonia" OR "pleuropneumonitis" OR "pneumonitis" OR "pulmonal inflammation" OR "pulmonary inflammation" OR "pulmonic inflammation" OR "bronchopneumonia" OR "bronchopneumonias" OR "Respiratory Tract Infections" OR "Respiratory Tract Infections" OR "Respiratory Tract Infection" OR "Respiratory Infection" OR "Respiratory Infections" OR "whooping cough" OR "pertussis" OR "pulmonary tract infection" OR "respiration infection" OR "Bronchiolitis" OR " bronchitis" OR "bronchopulmonary infection" OR "Croup" OR "Croup" OR "diphtheria" OR "laryngitis" OR "Severe Acute Respiratory Syndrome" OR "Severe Acute Respiratory Syndrome" OR "SARS" OR "Acute Chest Syndrome" OR "acute chest syndrome" OR "acute chest syndromes" OR "Acute Lower Respiratory Infection" OR "Acute Lower Respiratory Infections" OR "ALRI" OR "LRI" OR "ARI" OR "respiration tract infection" OR "respiration tract infections" OR "legionnaire disease" OR "legionnaires disease" OR "legionnaires disease" OR "Pontiac fever" OR "lung infiltrate" OR "lung infiltration" OR "pulmonary infiltrate" OR "pulmonary infiltration" OR "pneumonic lung" OR "rds" OR "respiratory distress" OR "respiration distress" OR "Malaria" OR "malaria" OR "malarias" OR "Plasmodium Infection" OR "Plasmodium Infections" OR "Plasmodium falciparum" OR "Plasmodium falciparum" OR "Plasmodium falciparums" OR "malaria, falciparum" OR "blackwater fever" OR "blackwater fevers" OR "black water fever" OR "black water fevers" OR "remittent fever" OR "paludism" OR "plasmodium infection" OR "plasmodium infections" OR "marsh fever" OR "falciparum infection" OR "Plasmodium vivax" OR "Plasmodium vivax" OR "Plasmodium vivaxs" OR "malaria, vivax" OR "vivax infection" OR "Plasmodium ovale" OR "Plasmodium ovale" OR "Plasmodium ovales" OR "Plasmodium malariae" OR "Plasmodium malariae" OR "Meningitis" OR "Meningitis" OR "Meningitides" OR "Pachymeningitis" OR "Pachymeningitides" OR "Arachnoiditis" OR "Arachnoiditides" OR "Arachnoid Membrane inflammation" OR "Arachnoid Membrane inflammations" OR "Meningoencephalitis" OR "Meningoencephalitis" OR "Cerebromeningitis" OR "Encephalomeningitis" OR "Encephalomeningitides" OR "Haemophilus influenzae" OR "Haemophilus parainfluenzae" OR "Cerebromeningitides" OR "Cerebritis" OR "Cerebritides" OR "Waterhouse Friderichsen Syndrome" OR "Waterhouse Friederichsen Syndrome" OR "Waterhouse-Friderichsen Syndrome" OR "Waterhouse-Friederichsen Syndrome" OR "Purpura Fulminans" OR "Meningococcal" OR "Meningeal" OR "Cerebral Cryptococcosis" OR "Cerebral Cryptococcoses" OR "Toruloma" OR "Torulomas" OR "Lymphocytic Choriomeningitis" OR "Armstrong Syndrome" OR "Armstrong's Syndrome" OR "Encephalitis" OR "Encephalitis" OR "Encephalitides" OR "encephalitis" OR "brain inflammation" OR "brain inflammations" OR "Rasmussen syndrome" OR "Rasmussen's syndrome" OR "Cerebral Ventriculitis" OR "Cerebral Ventriculitides" OR "Infectious Ventriculitis" OR "Infectious Ventriculitides" OR "Encephalomyelitis" OR "Meningoencephalitides" OR "Meningoencephalitis" OR "Cerebromeningitis" OR "myeloencephalitis" OR "Lupus Vasculitis" OR "Central Nervous System Lupus" OR "Lupus Erythematosis" OR "Lupus Erythematosis" OR "brain vasculitis" OR "brain angitis" OR "brain arteritis" OR "cerebral arteritis" OR "cerebral vasculitis" OR "Neisseria meningitidis" OR "Neisseria meningitidis" OR "Neisseria meningitides" OR "Micrococcus intracellularis" OR "Neisseria weichselbaumi" OR "Meningococcus" OR "meningococemia" OR "meningococci" OR "Meningococcal Infections" OR "meningococcal" OR "meningococcaemia" OR "sepsis" OR "sepsis" OR "Pyemia" OR "Pyemias" OR "Pyohemia" OR "Pyohemias" OR "Pyaemia" OR "Pyaemias" OR "Septicemia" OR "Septicemias" OR "Blood Poisoning" OR "Blood Poisonings" OR "septic" OR "sepsis" OR "congenital abnormalities" OR "congenital" OR "Deformities" OR "Deformity" OR "Birth Defects" OR "Birth Defect" OR "abnormality" OR "abnormalities" OR "malformation" OR "malformations" OR "malformative" OR "malformed" OR "neural tube defects" OR "neural tube" OR "Craniorachischisis" OR "Craniorachischises" OR "Diastematomyelia" OR "Diastematomyelias" OR "Tethered Cord" OR "Spinal Dysraphism" OR "Tethered Spinal Cord" OR "Spinal Dysraphisms" OR "Iniencephaly" OR "Iniencephalies" OR "Neurenteric" OR "Neuroenteric" OR "Spinal Cord Myelodysplasia" OR "Spinal Cord Myelodysplasias" OR "Acrania" OR "Acrantias" OR "Exencephaly" OR "Exencephalies" OR "dysgraphia" OR "dysraphic" OR "dysraphism" OR "dysraphy" OR "NTD" OR "NTDS" OR "sudden infant death syndrome" OR "sudden infant death" OR "sid" OR "SIDS" OR "cot death" OR "cot deaths" OR "crib death" OR "fetal alcohol spectrum disorders" OR "Fetal alcohol spectrum" OR "Foetal alcohol spectrum" OR "FASD" OR "FASDs" OR</p> | January 16, 2018 |
|---------|---------------------------------------------------------------------------------------------------------------------------------------------------------------------------------------------------------------------------------------------------------------------------------------------------------------------------------------------------------------------------------------------------------------------------------------------------------------------------------------------------------------------------------------------------------------------------------------------------------------------------------------------------------------------------------------------------------------------------------------------------------------------------------------------------------------------------------------------------------------------------------------------------------------------------------------------------------------------------------------------------------------------------------------------------------------------------------------------------------------------------------------------------------------------------------------------------------------------------------------------------------------------------------------------------------------------------------------------------------------------------------------------------------------------------------------------------------------------------------------------------------------------------------------------------------------------------------------------------------------------------------------------------------------------------------------------------------------------------------------------------------------------------------------------------------------------------------------------------------------------------------------------------------------------------------------------------------------------------------------------------------------------------------------------------------------------------------------------------------------------------------------------------------------------------------------------------------------------------------------------------------------------------------------------------------------------------------------------------------------------------------------------------------------------------------------------------------------------------------------------------------------------------------------------------------------------------------------------------------------------------------------------------------------------------------------------------------------------------------------------------------------------------------------------------------------------------------------------------------------------------------------------------------------------------------------------------------------------------------------------------------------------------------------------------------------------------------------------------------------------------------------------------------------------------------------------------------------------------------------------------------------------------------------------------------------------------------------------------------------------------------------------------------------------------------------------------------------------------------------------------------------------------------------------------------------------------------------------------------------------------------------------------------------------------------------------------------------------------------------------------------------------------------------------------------------------------------------------------------------------------------------------------------------------------------------------------------------------------------------------------------------------------------------------------------------------------------------------------------------------------------------------------------------------------------------------------------------------------------------------------------------------------------------------------------------------------------------------------------------------------------------------------------------------------------------------------------------------------------------------------------------------------------------------------------------------------------------------------------------------------------------------------------------------------------------------------------------------------------------------------------------------------------------------------------------------------------------------------------------------------------------------------------------------------------------------------------------------------------------------------------------------------------------------------------------------------------------------------------------------------------------------------------------------------------------------------------------------------------------------------------------------------------------------------------------------------------------------------------------------------------------------------------------------------------------------------------------------------------------------------------------------------------------------------------------------------------------------------------------------------------------------------------------------------------------------------------------------------------------------------------------------------------------------------------------------------------------------------------------------------------------------------------------------------------------------------------------------------------------------------------------------------------------------------------------------------------------------------------------------------------------------------------------------------------------------------------------------------------------------------------------------------------------------------------------------------------------------------------------------------------------------------------------------------------------------------------------------------------------------------------------------------------------------------------------------------------------------------------------------------------------------------------------|------------------|

|                |                                                                                                                                                                                                                                                                                                                                                                                                                                                                                                                                                                                                                                                                                                                                                                                                                                                                                                                                                                                                                                                                                                                                                                                                                                                                                                                                                                                                                                                                                                                                                                                                                                                                                                                                                                                                                                                                                                                                                                                                                                                                                                                                                                                                                                                                                                                                                                                                                                                                                                                                                                                                                                                                                                                                                                                                                                                                                                                                                                                                                                                                                                                                                                                                                                                                                                                                                                                                                                                                                                                                                                                                                                                                                                                                                                                                                                                                                                                                                                                                                                                                                                                                                                                                                                                                                                                                                                                                                                                                                                                                                                                                                                                                                                                                                                                                                                                                                                                                                                                                                                                                                                                                                                                                                                                                                                                                                                                                                                                                                                                                                                                                                                                                                                                                                 |                  |
|----------------|-------------------------------------------------------------------------------------------------------------------------------------------------------------------------------------------------------------------------------------------------------------------------------------------------------------------------------------------------------------------------------------------------------------------------------------------------------------------------------------------------------------------------------------------------------------------------------------------------------------------------------------------------------------------------------------------------------------------------------------------------------------------------------------------------------------------------------------------------------------------------------------------------------------------------------------------------------------------------------------------------------------------------------------------------------------------------------------------------------------------------------------------------------------------------------------------------------------------------------------------------------------------------------------------------------------------------------------------------------------------------------------------------------------------------------------------------------------------------------------------------------------------------------------------------------------------------------------------------------------------------------------------------------------------------------------------------------------------------------------------------------------------------------------------------------------------------------------------------------------------------------------------------------------------------------------------------------------------------------------------------------------------------------------------------------------------------------------------------------------------------------------------------------------------------------------------------------------------------------------------------------------------------------------------------------------------------------------------------------------------------------------------------------------------------------------------------------------------------------------------------------------------------------------------------------------------------------------------------------------------------------------------------------------------------------------------------------------------------------------------------------------------------------------------------------------------------------------------------------------------------------------------------------------------------------------------------------------------------------------------------------------------------------------------------------------------------------------------------------------------------------------------------------------------------------------------------------------------------------------------------------------------------------------------------------------------------------------------------------------------------------------------------------------------------------------------------------------------------------------------------------------------------------------------------------------------------------------------------------------------------------------------------------------------------------------------------------------------------------------------------------------------------------------------------------------------------------------------------------------------------------------------------------------------------------------------------------------------------------------------------------------------------------------------------------------------------------------------------------------------------------------------------------------------------------------------------------------------------------------------------------------------------------------------------------------------------------------------------------------------------------------------------------------------------------------------------------------------------------------------------------------------------------------------------------------------------------------------------------------------------------------------------------------------------------------------------------------------------------------------------------------------------------------------------------------------------------------------------------------------------------------------------------------------------------------------------------------------------------------------------------------------------------------------------------------------------------------------------------------------------------------------------------------------------------------------------------------------------------------------------------------------------------------------------------------------------------------------------------------------------------------------------------------------------------------------------------------------------------------------------------------------------------------------------------------------------------------------------------------------------------------------------------------------------------------------------------------------------------------------------|------------------|
|                | <p>"Fetal Alcohol Syndrome" OR "Alcohol-Related Birth Defects" OR "Alcohol Related Birth Defects" OR "Alcohol Related Neurodevelopmental Disorder" OR "FAE" OR "Fetal Alcohol Effects" OR "FAEs" OR "Fetal Alcohol Syndrome" OR "Fetus Alcohol Syndrome" OR "Foetal alcohol syndrome" OR "premature birth" OR "premature" OR "preterm" OR "pre-mature" OR "pre-term" OR "prematurity" OR "prematurnitas" OR "asphyxia" OR "asphyxia" OR "Asphyxia Neonatorum" OR "Asphyxia Neonatorum" OR "hypoxia" OR "Asphyxias" OR "Suffocation" OR "Suffocations" OR "anoxia" OR ("intrapartum" AND "related") OR "tetanus" OR "tetanus" OR "tetani" OR "diphtheria-tetanus-pertussis" OR "rubella" OR "rubella" OR "measles" OR "epidemic roseola" OR "necrosis" OR "necrosis" OR "necrotic" OR "necroses" OR "necrotizing" OR "Infarction" OR "infarctions" OR "birth injuries" OR "birth injuries" OR "birth injury" OR "birth trauma" OR "Obstetric Paralysis" OR "Obstetric Paralysis" OR "Obstetrical Paralysis" OR "Obstetrical Paralysis" OR "birth damage" OR "birth lesion" OR "birth palsy" OR "birth paralysis" OR "obstetric palsy" OR "obstetrical palsy" OR "brachial palsy" OR "brachial paralysis" OR "brachial plexus paralysis" OR "delivery trauma" OR "arm paralysis" OR "paralysis brachialis" OR "jaundice" OR "jaundice" OR "jaundices" OR "Icterus" OR "bronze baby syndrome" OR "erythroleukoblastosis" OR "hemorrhage" OR "hemorrhage" OR "haemorrhage" OR "haemorrhagic" OR "Hemorrhagic" OR "Nutrition disorders" OR "malnutrition" OR "Nutritional" OR "Undernutrition" OR "Malnourishment" OR "Malnourishments" OR "Deficiency" OR "Deficiencies" OR "Refeeding Syndrome" OR "Starvation" OR "Starvations" OR "Famine" OR "Famines" OR "deficient" OR "underfeeding" OR "undernourishment" OR "nutrition" OR "Hypervitaminosis" OR "Noncommunicable Diseases" OR "Noncommunicable" OR "Non-communicable" OR "communicable" OR "non-infectious" OR "infectious" OR "noninfectious" OR "Communicable Diseases" OR "Infant, Newborn, Diseases" OR "newborn" OR "neonatal" OR "perinatal" ) ) ) AND ( ( ( "Argentina" OR "Bolivia" OR "Brazil" OR "Brasil" OR "Chile" OR "Colombia" OR "Ecuador" OR "French Guiana" OR "Guyana" OR "Paraguay" OR "Peru" OR "Suriname" OR "Uruguay" OR "Venezuela" OR "Mexico" OR "Belize" OR "Costa Rica" OR "El Salvador" OR "Guatemala" OR "Honduras" OR "Nicaragua" OR "Puerto Rico" OR "Panama" OR "West Indies" OR "Antigua" OR "Barbuda" OR "Bahamas" OR "Barbados" OR "Cuba" OR "Dominica" OR "Dominican Republic" OR "Grenada" OR "Guadeloupe" OR "Haiti" OR "Jamaica" OR "Martinique" OR "Antilles" OR "Anguilla" OR "Saint Kitts" OR "St Kitts" OR "Saint Lucia" OR "St Lucia" OR "Saint Vincent" OR "St Vincent" OR "Trinidad" OR "Tobago" OR "Virgin Islands" OR "Kazakhstan" OR "Kyrgyzstan" OR "Tajikistan" OR "Turkmenistan" OR "Uzbekistan" OR "Borneo" OR "Brunei" OR "Cambodia" OR "East Timor" OR "Indonesia" OR "Laos" OR "Malaysia" OR "Mekong Valley" OR "Myanmar" OR "Burma" OR "Philippines" OR "Singapore" OR "Thailand" OR "Vietnam" OR "Bangladesh" OR "Bhutan" OR "India" OR "Nepal" OR "Pakistan" OR "Sri Lanka" OR "China" OR "Korea" OR "Macao" OR "Macau" OR "Mongolia" OR "Taiwan" OR "Afghanistan" OR "Bahrain" OR "Iran" OR "Iraq" OR "Israel" OR "Jordan" OR "Kuwait" OR "Lebanon" OR "Oman" OR "Qatar" OR "Saudi Arabia" OR "Syria" OR "Turkey" OR "United Arab Emirates" OR "Yemen" OR "Fiji" OR "New Caledonia" OR "Papua New Guinea" OR "Vanuatu" OR "Micronesia" OR "Melanesia" OR "Guam" OR "Palau" OR "Polynesia" OR "Samoa" OR "Tonga" OR "Armenia" OR "Azerbaijan" OR "Georgia" OR "Albania" OR "Estonia" OR "Latvia" OR "Lithuania" OR "Bosnia" OR "Herzegovina" OR "Serbia" OR "Bulgaria" OR "Belarus" OR "Croatia" OR "Czech Republic" OR "Hungary" OR "Macedonia" OR "Moldova" OR "Montenegro" OR "Poland" OR "Romania" OR "Russia" OR "Bashkiria" OR "Dagestan" OR "Slovakia" OR "Slovenia" OR "Ukraine" OR "Cameroon" OR "Central African Republic" OR "Chad" OR "Congo" OR "Equatorial Guinea" OR "Gabon" OR "Burundi" OR "Djibouti" OR "Eritrea" OR "Ethiopia" OR "Kenya" OR "Rwanda" OR "Somalia" OR "Sudan" OR "Tanzania" OR "Uganda" OR "Angola" OR "Botswana" OR "Lesotho" OR "Malawi" OR "Mozambique" OR "Namibia" OR "South Africa" OR "Swaziland" OR "Zambia" OR "Zimbabwe" OR "Benin" OR "Burkina Faso" OR "Cote d'Ivoire" OR "Gambia" OR "Ghana" OR "Guinea" OR "Guinea-Bissau" OR "Liberia" OR "Mali" OR "Mauritania" OR "Niger" OR "Nigeria" OR "Senegal" OR "Sierra Leone" OR "Togo" OR "Algeria" OR "Egypt" OR "Libya" OR "Morocco" OR "Tunisia" OR "Comoros" OR "Madagascar" OR "Mauritius" OR "Reunion" OR "Seychelles" OR "Cabo Verde" OR "Kiribati" OR "Marshall Islands" OR "Nauru" OR "Niue" OR "Sao Tome" OR "Solomon Islands" OR "South Sudan" OR "Developing Countries" OR "Developing" OR "Least Developed" OR "Less-Developed" OR "Less Developed" OR "Under-Developed" OR "Under Developed" OR "UnderDeveloped" OR "third-world" OR "third world" OR "Africa" OR "Africa" OR "Caribbean Region" OR "Caribbean Region" OR "West Indies" OR "Pacific Islands" OR "Pacific Islands" OR "Micronesia" OR "Melanesia" OR "Polynesia" OR "Mexico" OR "Mexico" OR "Latin America" OR "Latin America" OR "South America" OR "South America" OR "Indian Ocean Islands" OR "Indian Ocean Islands" OR "Pemb" OR "Cocos" OR "Maldives" OR "Central America" OR "Central America" OR "Asia" OR "Asia" OR "far east" OR "eastern europe" OR "eastern europe" OR "province" OR "provinces" OR "district" OR "districts" OR "prefecture" OR "prefectures" OR "county" OR "counties" OR "municipality" OR "municipalities" ) ) )</p> |                  |
| Web of Science | <p>TOPIC: ("Infant" OR "Infant, Newborn" OR "child" OR "Child, Preschool" OR "Minors" OR "infant" OR "infants" OR "neonate" OR "neonates" OR "neonatal" OR "newborn" OR "newborns" OR "new-born" OR "new-borns" OR "baby" OR "babies" OR "Premature" OR "preterm" OR "pre term" OR "child" OR "children" OR "youth" OR "youths" OR "young people" OR "childhood" OR "toddler" OR "toddlers" OR "kid" OR "kids" OR "young patient" OR "young patients" OR "boy" OR "boys" OR "girl" OR "girls" OR "young age" OR "pediatric" OR "pre-schooler" OR "preschooler" OR "under 5" OR "under five" OR "under fives" OR "less than five" OR "perinatal") AND</p>                                                                                                                                                                                                                                                                                                                                                                                                                                                                                                                                                                                                                                                                                                                                                                                                                                                                                                                                                                                                                                                                                                                                                                                                                                                                                                                                                                                                                                                                                                                                                                                                                                                                                                                                                                                                                                                                                                                                                                                                                                                                                                                                                                                                                                                                                                                                                                                                                                                                                                                                                                                                                                                                                                                                                                                                                                                                                                                                                                                                                                                                                                                                                                                                                                                                                                                                                                                                                                                                                                                                                                                                                                                                                                                                                                                                                                                                                                                                                                                                                                                                                                                                                                                                                                                                                                                                                                                                                                                                                                                                                                                                                                                                                                                                                                                                                                                                                                                                                                                                                                                                                        | January 16, 2018 |

|                                                                                                                                                                                                                                                                                                                                                                                                                                                                                                                                                                                                                                                                                                                                                                                                                                                                                                                                                                                                                                                                                                                                                                                                                                                                                                                                                                                                                                                                                                                                                                                                                                                                                                                                                                                                                                                                                                                                                                                                                                                                                                                                                                                                                                                                                                                                                                                                                                                                                                                                                                                                                                                                                                                                                                                                                                                                                                                                                                                                                                                                                                                                                                                                                                                                                                                                                                                                                                                                                                                                                                                                                                                                                                                                                                                                                                                                                                                                                                                                                                                                                                                                                                                                                                                                                                                                                                                                                                                                                                                                                                                                                                                                                                                                                                                                                                                                                                                                                                                                                                                                                                                                                                                                                                                                                                                                                                                                                                                                                                                                                                                                                                                                                                                                                                                                                                                                                                                                                                                                                                                                                                                                                                                                                                                                                                                                                                                                                                                                                                                                                                                                                                                                                                                                                                                                                                                                                                                                                |  |
|------------------------------------------------------------------------------------------------------------------------------------------------------------------------------------------------------------------------------------------------------------------------------------------------------------------------------------------------------------------------------------------------------------------------------------------------------------------------------------------------------------------------------------------------------------------------------------------------------------------------------------------------------------------------------------------------------------------------------------------------------------------------------------------------------------------------------------------------------------------------------------------------------------------------------------------------------------------------------------------------------------------------------------------------------------------------------------------------------------------------------------------------------------------------------------------------------------------------------------------------------------------------------------------------------------------------------------------------------------------------------------------------------------------------------------------------------------------------------------------------------------------------------------------------------------------------------------------------------------------------------------------------------------------------------------------------------------------------------------------------------------------------------------------------------------------------------------------------------------------------------------------------------------------------------------------------------------------------------------------------------------------------------------------------------------------------------------------------------------------------------------------------------------------------------------------------------------------------------------------------------------------------------------------------------------------------------------------------------------------------------------------------------------------------------------------------------------------------------------------------------------------------------------------------------------------------------------------------------------------------------------------------------------------------------------------------------------------------------------------------------------------------------------------------------------------------------------------------------------------------------------------------------------------------------------------------------------------------------------------------------------------------------------------------------------------------------------------------------------------------------------------------------------------------------------------------------------------------------------------------------------------------------------------------------------------------------------------------------------------------------------------------------------------------------------------------------------------------------------------------------------------------------------------------------------------------------------------------------------------------------------------------------------------------------------------------------------------------------------------------------------------------------------------------------------------------------------------------------------------------------------------------------------------------------------------------------------------------------------------------------------------------------------------------------------------------------------------------------------------------------------------------------------------------------------------------------------------------------------------------------------------------------------------------------------------------------------------------------------------------------------------------------------------------------------------------------------------------------------------------------------------------------------------------------------------------------------------------------------------------------------------------------------------------------------------------------------------------------------------------------------------------------------------------------------------------------------------------------------------------------------------------------------------------------------------------------------------------------------------------------------------------------------------------------------------------------------------------------------------------------------------------------------------------------------------------------------------------------------------------------------------------------------------------------------------------------------------------------------------------------------------------------------------------------------------------------------------------------------------------------------------------------------------------------------------------------------------------------------------------------------------------------------------------------------------------------------------------------------------------------------------------------------------------------------------------------------------------------------------------------------------------------------------------------------------------------------------------------------------------------------------------------------------------------------------------------------------------------------------------------------------------------------------------------------------------------------------------------------------------------------------------------------------------------------------------------------------------------------------------------------------------------------------------------------------------------------------------------------------------------------------------------------------------------------------------------------------------------------------------------------------------------------------------------------------------------------------------------------------------------------------------------------------------------------------------------------------------------------------------------------------------------------------------------------------------|--|
| <p>TOPIC: ("Mortality" OR "Mortalities" OR "fatal" OR "fatality" OR "fatalities" OR "death" OR "deaths")<br/>AND<br/>TOPIC: ("Diarrhea" OR "Diarrhea" OR "Diarrheas" OR "Diarrheal" OR "diarrhoeal" OR "diarrhoea" OR "diarrhoeas" OR "Dysentery" OR "Dysentery" OR "dysentery" OR "enteritis" OR "enteritides" OR "Cholera" OR "Cholera" OR "Choleras" OR "vibrio Cholerae" OR "Gastroenteritis" OR "gastroenteritis" OR "gastroenteritides" OR "gastro enteritis" OR "gastroduodenitis" OR "gastrointestinal acute infection" OR "gastrointestinal acute infections" OR "gastrointestinal infection" OR "gastrointestinal infections" OR "digestive tract infection" OR "digestive tract infections" OR "digestive infection" OR "gastrointestinal tract infection" OR "gastrointestine tract infection" OR "Pneumonia" OR "pneumonia" OR "pneumonias" OR "pneumonitis" OR "pulmonary inflammation" OR "pulmonary inflammations" OR "lung inflammation" OR "Lung Inflammations" OR "inflammatory lung disease" OR "lobitis" OR "peripneumonia" OR "pleuropneumonia" OR "pleuropneumonitis" OR "pneumonitis" OR "pulmonal inflammation" OR "pulmonary inflammation" OR "pulmonic inflammation" OR "bronchopneumonia" OR "bronchopneumonias" OR "Respiratory Tract Infections" OR "Respiratory Tract Infections" OR "Respiratory Tract Infection" OR "Respiratory Infection" OR "Respiratory Infections" OR "whooping cough" OR "pertussis" OR "pertussis" OR "pulmonary tract infection" OR "respiration infection" OR "Bronchiolitis" OR " bronchitis" OR "bronchopulmonary infection" OR "Croup" OR "Croup" OR "diphtheria" OR "laryngitis" OR "Severe Acute Respiratory Syndrome" OR "Severe Acute Respiratory Syndrome" OR "SARS" OR "Acute Chest Syndrome" OR "acute chest syndrome" OR "acute chest syndromes" OR "Acute Lower Respiratory Infection" OR "Acute Lower Respiratory Infections" OR "ALRI" OR "LRI" OR "ARI" OR "respiration tract infection" OR "respiration tract infections" OR "legionnaire disease" OR "legionnaires' disease" OR "legionnaires disease" OR "Pontiac fever" OR "lung infiltrate" OR "lung infiltration" OR "pulmonary infiltrate" OR "pulmonary infiltration" OR "pneumonic lung" OR "rds" OR "respiratory distress" OR "respiration distress" OR "Malaria" OR "malaria" OR "malarias" OR "Plasmodium Infection" OR "Plasmodium Infections" OR "Plasmodium falciparum" OR "Plasmodium falciparum" OR "Plasmodium falciparums" OR "malaria, falciparum" OR "blackwater fever" OR "blackwater fevers" OR "black water fever" OR "black water fevers" OR "remittent fever" OR "paludism" OR "plasmodium infection" OR "plasmodium infections" OR "marsh fever" OR "falciparum infection" OR "Plasmodium vivax" OR "Plasmodium vivax" OR "Plasmodium vivaxs" OR "malaria, vivax" OR "vivax infection" OR "Plasmodium ovale" OR "Plasmodium ovale" OR "Plasmodium ovales" OR "Plasmodium malariae" OR "Plasmodium malariae" OR "Meningitis" OR "Meningitis" OR "Meningitides" OR "Pachymeningitis" OR "Pachymeningitides" OR "Arachnoiditis" OR "Arachnoiditides" OR "Arachnoid Membrane inflammation" OR "Arachnoid Membrane inflammations" OR "Meningoencephalitis" OR "Meningoencephalitis" OR "Meningocephalitis" OR "Cerebromeningitis" OR "Encephalomeningitis" OR "Encephalomeningitides" OR "Haemophilus influenzae" OR "Haemophilus parainfluenzae" OR "Cerebromeningitides" OR "Cerebritis" OR "Cerebritides" OR "Waterhouse Friderichsen Syndrome" OR "Waterhouse Friederichsen Syndrome" OR "Waterhouse-Friederichsen Syndrome" OR "Waterhouse-Friederichsen Syndrome" OR "Purpura Fulminans" OR "Meningococcal" OR "Meningeal" OR "Cerebral Cryptococcosis" OR "Cerebral Cryptococcoses" OR "Toruloma" OR "Torulomas" OR "Lymphocytic Choriomeningitis" OR "Armstrong Syndrome" OR "Armstrong's Syndrome" OR "Encephalitis" OR "Encephalitis" OR "Encephalitis" OR "encephalitis" OR "brain inflammation" OR "brain inflammations" OR "Rasmussen syndrome" OR "Rasmussen's syndrome" OR "Cerebral Ventriculitis" OR "Cerebral Ventriculitides" OR "Infectious Ventriculitis" OR "Infectious Ventriculitides" OR "Encephalomyelitis" OR "Meningoencephalitis" OR "Meningoencephalitis" OR "Cerebromeningitis" OR "myeloencephalitis" OR "Lupus Vasculitis" OR "Central Nervous System Lupus" OR "Lupus Erythematosus" OR "Lupus Erythematosus" OR "brain vasculitis" OR "brain angitis" OR "brain arteritis" OR "cerebral arteritis" OR "cerebral vasculitis" OR "Neisseria meningitidis" OR "Neisseria meningitidis" OR "Neisseria meningitides" OR "Micrococcus intracellularis" OR "Neisseria weichselbaumi" OR "Meningococcus" OR "meningococemia" OR "meningococci" OR "Meningococcal Infections" OR "meningococcal" OR "meningococcaemia" OR "sepsis" OR "sepsis" OR "Pyemia" OR "Pyemias" OR "Pyohemia" OR "Pyohemias" OR "Pyemia" OR "Pyemias" OR "Septicemia" OR "Septicemias" OR "Blood Poisoning" OR "Blood Poisonings" OR "septic" OR "sepsis" OR "congenital abnormalities" OR "congenital" OR "Deformities" OR "Deformity" OR "Birth Defects" OR "Birth Defect" OR "abnormality" OR "abnormalities" OR "malformation" OR "malformations" OR "malformative" OR "malformed" OR "neural tube defects" OR "neural tube" OR "Craniorachischisis" OR "Craniorachischises" OR "Diastematomyelia" OR "Diastematomyelias" OR "Tethered Cord" OR "Spinal Dysraphism" OR "Tethered Spinal Cord" OR "Spinal Dysraphisms" OR "Iniencephaly" OR "Iniencephalies" OR "Neurenteric" OR "Neuroenteric" OR "Spinal Cord Myelodysplasia" OR "Spinal Cord Myelodysplasias" OR "Acrania" OR "Acrantias" OR "Exencephaly" OR "Exencephalies" OR "dysgraphia" OR "dysraphic" OR "dysraphism" OR "dysraphy" OR "NTD" OR "NTDS" OR "sudden infant death syndrome" OR "sudden infant death" OR "sid" OR "SIDS" OR "cot death" OR "cot deaths" OR "crib death" OR "fetal alcohol spectrum disorders" OR "Fetal alcohol spectrum" OR "Foetal alcohol spectrum" OR "FASD" OR "FASDs" OR "Fetal Alcohol Syndrome" OR "Alcohol-Related Birth Defects" OR "Alcohol Related Birth Defects" OR "Alcohol Related Neurodevelopmental Disorder" OR "FAE" OR "Fetal Alcohol Effects" OR "FAEs" OR "Fetal Alcohol Syndrome" OR "Fetus Alcohol Syndrome" OR "Foetal alcohol syndrome" OR "premature birth" OR "premature" OR "preterm" OR "pre-mature" OR "pre-term" OR "prematurity" OR "prematurnitas" OR "asphyxia" OR "asphyxia" OR "Asphyxia Neonatorum" OR "Asphyxia Neonatorum" OR "hypoxia" OR "Asphyxias" OR "Suffocation" OR "Suffocations" OR "anoxia" OR "intrapartum" AND "related") OR "tetanus" OR "tetanus" OR "tetani" OR "diphtheria-tetanus-pertussis" OR "rubella" OR "rubella" OR "measles" OR "epidemic roseola" OR "necrosis" OR "necrosis" OR "necrotic" OR "necroses" OR "necrotizing" OR "Infarction" OR "infarctions" OR "birth injuries" OR "birth injuries" OR "birth injury" OR "birth</p> |  |
|------------------------------------------------------------------------------------------------------------------------------------------------------------------------------------------------------------------------------------------------------------------------------------------------------------------------------------------------------------------------------------------------------------------------------------------------------------------------------------------------------------------------------------------------------------------------------------------------------------------------------------------------------------------------------------------------------------------------------------------------------------------------------------------------------------------------------------------------------------------------------------------------------------------------------------------------------------------------------------------------------------------------------------------------------------------------------------------------------------------------------------------------------------------------------------------------------------------------------------------------------------------------------------------------------------------------------------------------------------------------------------------------------------------------------------------------------------------------------------------------------------------------------------------------------------------------------------------------------------------------------------------------------------------------------------------------------------------------------------------------------------------------------------------------------------------------------------------------------------------------------------------------------------------------------------------------------------------------------------------------------------------------------------------------------------------------------------------------------------------------------------------------------------------------------------------------------------------------------------------------------------------------------------------------------------------------------------------------------------------------------------------------------------------------------------------------------------------------------------------------------------------------------------------------------------------------------------------------------------------------------------------------------------------------------------------------------------------------------------------------------------------------------------------------------------------------------------------------------------------------------------------------------------------------------------------------------------------------------------------------------------------------------------------------------------------------------------------------------------------------------------------------------------------------------------------------------------------------------------------------------------------------------------------------------------------------------------------------------------------------------------------------------------------------------------------------------------------------------------------------------------------------------------------------------------------------------------------------------------------------------------------------------------------------------------------------------------------------------------------------------------------------------------------------------------------------------------------------------------------------------------------------------------------------------------------------------------------------------------------------------------------------------------------------------------------------------------------------------------------------------------------------------------------------------------------------------------------------------------------------------------------------------------------------------------------------------------------------------------------------------------------------------------------------------------------------------------------------------------------------------------------------------------------------------------------------------------------------------------------------------------------------------------------------------------------------------------------------------------------------------------------------------------------------------------------------------------------------------------------------------------------------------------------------------------------------------------------------------------------------------------------------------------------------------------------------------------------------------------------------------------------------------------------------------------------------------------------------------------------------------------------------------------------------------------------------------------------------------------------------------------------------------------------------------------------------------------------------------------------------------------------------------------------------------------------------------------------------------------------------------------------------------------------------------------------------------------------------------------------------------------------------------------------------------------------------------------------------------------------------------------------------------------------------------------------------------------------------------------------------------------------------------------------------------------------------------------------------------------------------------------------------------------------------------------------------------------------------------------------------------------------------------------------------------------------------------------------------------------------------------------------------------------------------------------------------------------------------------------------------------------------------------------------------------------------------------------------------------------------------------------------------------------------------------------------------------------------------------------------------------------------------------------------------------------------------------------------------------------------------------------------------------------------------------------------------|--|

|                         |                                                                                                                                                                                                                                                                                                                                                                                                                                                                                                                                                                                                                                                                                                                                                                                                                                                                                                                                                                                                                                                                                                                                                                                                                                                                                                                                                                                                                                                                                                                                                                                                                                                                                                                                                                                                                                                                                                                                                                                                                                                                                                                                                                                                                                                                                                                                                                                                                                                                                                                                                                                                                                                                                                                                                                                                                                                                                                                                                                                                                                                                                                                                                                                                                                                                                                                                                                                                                                                                                                                                                                                                                                                                                                                                                                                                                                                                                                                                                                                                                                                                                                                                                                                                                                                                                                                                                                                                                                                                                                                                                                                                                                                                                                                                                                                                                                                                                                             |                  |
|-------------------------|-------------------------------------------------------------------------------------------------------------------------------------------------------------------------------------------------------------------------------------------------------------------------------------------------------------------------------------------------------------------------------------------------------------------------------------------------------------------------------------------------------------------------------------------------------------------------------------------------------------------------------------------------------------------------------------------------------------------------------------------------------------------------------------------------------------------------------------------------------------------------------------------------------------------------------------------------------------------------------------------------------------------------------------------------------------------------------------------------------------------------------------------------------------------------------------------------------------------------------------------------------------------------------------------------------------------------------------------------------------------------------------------------------------------------------------------------------------------------------------------------------------------------------------------------------------------------------------------------------------------------------------------------------------------------------------------------------------------------------------------------------------------------------------------------------------------------------------------------------------------------------------------------------------------------------------------------------------------------------------------------------------------------------------------------------------------------------------------------------------------------------------------------------------------------------------------------------------------------------------------------------------------------------------------------------------------------------------------------------------------------------------------------------------------------------------------------------------------------------------------------------------------------------------------------------------------------------------------------------------------------------------------------------------------------------------------------------------------------------------------------------------------------------------------------------------------------------------------------------------------------------------------------------------------------------------------------------------------------------------------------------------------------------------------------------------------------------------------------------------------------------------------------------------------------------------------------------------------------------------------------------------------------------------------------------------------------------------------------------------------------------------------------------------------------------------------------------------------------------------------------------------------------------------------------------------------------------------------------------------------------------------------------------------------------------------------------------------------------------------------------------------------------------------------------------------------------------------------------------------------------------------------------------------------------------------------------------------------------------------------------------------------------------------------------------------------------------------------------------------------------------------------------------------------------------------------------------------------------------------------------------------------------------------------------------------------------------------------------------------------------------------------------------------------------------------------------------------------------------------------------------------------------------------------------------------------------------------------------------------------------------------------------------------------------------------------------------------------------------------------------------------------------------------------------------------------------------------------------------------------------------------------------------------|------------------|
|                         | <p>trauma" OR "Obstetric Paralyse" OR "Obstetric Paralysis" OR "Obstetrical Paralyse" OR "Obstetrical Paralysis" OR "birth damage" OR "birth lesion" OR "birth palsy" OR "birth paralysis" OR "obstetric palsy" OR "obstetrical palsy" OR "brachial palsy" OR "brachial paralysis" OR "brachial plexus paralysis" OR "delivery trauma" OR "arm paralysis" OR "paralysis brachialis" OR "jaundice" OR "jaundice" OR "jaundices" OR "Icterus" OR "bronze baby syndrome" OR "erythroleukoblastosis" OR "hemorrhage" OR "hemorrhage" OR "haemorrhage" OR "haemorrhagic" OR "Hemorrhagic" OR "Nutrition disorders" OR "malnutrition" OR "Nutritional" OR "Undernutrition" OR "Malnourishment" OR "Malnourishments" OR "Deficiency" OR "Deficiencies" OR "Refeeding Syndrome" OR "Starvation" OR "Starvations" OR "Famine" OR "Famines" OR "deficient" OR "underfeeding" OR "undernourishment" OR "nutrition" OR "Hypervitaminosis" OR "Noncommunicable Diseases" OR "Noncommunicable" OR "Non-communicable" OR "communicable" OR "non-infectious" OR "infectious" OR "noninfectious" OR "Communicable Diseases" OR "Infant, Newborn, Diseases" OR "newborn" OR "neonatal" OR "perinatal")</p> <p>AND</p> <p>TOPIC: ("Argentina" OR "Bolivia" OR "Brazil" OR "Brasil" OR "Chile" OR "Colombia" OR "Ecuador" OR "French Guiana" OR "Guyana" OR "Paraguay" OR "Peru" OR "Suriname" OR "Uruguay" OR "Venezuela" OR "Mexico" OR "Belize" OR "Costa Rica" OR "El Salvador" OR "Guatemala" OR "Honduras" OR "Nicaragua" OR "Puerto Rico" OR "Panama" OR "West Indies" OR "Antigua" OR "Barbuda" OR "Bahamas" OR "Barbados" OR "Cuba" OR "Dominica" OR "Dominican Republic" OR "Grenada" OR "Guadeloupe" OR "Haiti" OR "Jamaica" OR "Martinique" OR "Antilles" OR "Anguilla" OR "Saint Kitts" OR "St Kitts" OR "Saint Lucia" OR "St Lucia" OR "Saint Vincent" OR "St Vincent" OR "Trinidad" OR "Tobago" OR "Virgin Islands" OR "Kazakhstan" OR "Kyrgyzstan" OR "Tajikistan" OR "Turkmenistan" OR "Uzbekistan" OR "Borneo" OR "Brunei" OR "Cambodia" OR "East Timor" OR "Indonesia" OR "Laos" OR "Malaysia" OR "Mekong Valley" OR "Myanmar" OR "Burma" OR "Philippines" OR "Singapore" OR "Thailand" OR "Vietnam" OR "Bangladesh" OR "Bhutan" OR "India" OR "Nepal" OR "Pakistan" OR "Sri Lanka" OR "China" OR "Korea" OR "Macao" OR "Macau" OR "Mongolia" OR "Taiwan" OR "Afghanistan" OR "Bahrain" OR "Iran" OR "Iraq" OR "Israel" OR "Jordan" OR "Kuwait" OR "Lebanon" OR "Oman" OR "Qatar" OR "Saudi Arabia" OR "Syria" OR "Turkey" OR "United Arab Emirates" OR "Yemen" OR "Fiji" OR "New Caledonia" OR "Papua New Guinea" OR "Vanuatu" OR "Micronesia" OR "Melanesia" OR "Guam" OR "Palau" OR "Polynesia" OR "Samoa" OR "Tonga" OR "Armenia" OR "Azerbaijan" OR "Georgia" OR "Albania" OR "Estonia" OR "Latvia" OR "Lithuania" OR "Bosnia" OR "Herzegovina" OR "Serbia" OR "Bulgaria" OR "Belarus" OR "Croatia" OR "Czech Republic" OR "Hungary" OR "Macedonia" OR "Moldova" OR "Montenegro" OR "Poland" OR "Romania" OR "Russia" OR "Bashkiria" OR "Dagestan" OR "Slovakia" OR "Slovenia" OR "Ukraine" OR "Cameroon" OR "Central African Republic" OR "Chad" OR "Congo" OR "Equatorial Guinea" OR "Gabon" OR "Burundi" OR "Djibouti" OR "Eritrea" OR "Ethiopia" OR "Kenya" OR "Rwanda" OR "Somalia" OR "Sudan" OR "Tanzania" OR "Uganda" OR "Angola" OR "Botswana" OR "Lesotho" OR "Malawi" OR "Mozambique" OR "Namibia" OR "South Africa" OR "Swaziland" OR "Zambia" OR "Zimbabwe" OR "Benin" OR "Burkina Faso" OR "Cote d'Ivoire" OR "Gambia" OR "Ghana" OR "Guinea" OR "Guinea-Bissau" OR "Liberia" OR "Mali" OR "Mauritania" OR "Niger" OR "Nigeria" OR "Senegal" OR "Sierra Leone" OR "Togo" OR "Algeria" OR "Egypt" OR "Libya" OR "Morocco" OR "Tunisia" OR "Comoros" OR "Madagascar" OR "Mauritius" OR "Reunion" OR "Seychelles" OR "Cabo Verde" OR "Kiribati" OR "Marshall Islands" OR "Nauru" OR "Niue" OR "Sao Tome" OR "Solomon Islands" OR "South Sudan" OR "Developing Countries" OR "Developing" OR "Least Developed" OR "Less-Developed" OR "Less Developed" OR "Under-Developed" OR "Under Developed" OR "UnderDeveloped" OR "third-world" OR "third world" OR "Africa" OR "Africa" OR "Caribbean Region" OR "Caribbean Region" OR "West Indies" OR "Pacific Islands" OR "Pacific Islands" OR "Micronesia" OR "Melanesia" OR "Polynesia" OR "Mexico" OR "Mexico" OR "Latin America" OR "Latin America" OR "South America" OR "South America" OR "Indian Ocean Islands" OR "Indian Ocean Islands" OR "Pemba" OR "Cocos" OR "Maldives" OR "Central America" OR "Central America" OR "Asia" OR "Asia" OR "far east" OR "eastern europe" OR "eastern europe" OR "province" OR "provinces" OR "district" OR "districts" OR "prefecture" OR "prefectures" OR "county" OR "counties" OR "municipality" OR "municipalities")</p> <p>NOT</p> <p>DT=(Discussion OR Editorial Material OR Letter OR Note)</p> |                  |
| Africa-Wide Information | <p>Select a Field (Optional): "Infant" OR "Infant, Newborn" OR "child" OR "Child, Preschool" OR "Minors" OR "infant" OR "infants" OR "neonate" OR "neonates" OR "neonatal" OR "newborn" OR "newborns" OR "new-born" OR "new-borns" OR "baby" OR "babies" OR "Premature" OR "preterm" OR "pre term" OR "child" OR "children" OR "youth" OR "youths" OR "young people" OR "childhood" OR "toddler" OR "toddlers" OR "kid" OR "kids" OR "young patient" OR "young patients" OR "boy" OR "boys" OR "girl" OR "girls" OR "young age" OR "pediatric" OR "pre-schooler" OR "preschooler" OR "under 5" OR "under five" OR "under fives" OR "less than five" OR "perinatal"</p> <p>AND</p> <p>Select a Field (Optional): "Mortality" OR "Mortality" OR "Mortalities" OR "fatal" OR "fatality" OR "fatalities" OR "Death" OR "death" OR "deaths" OR "Child Mortality"</p> <p>AND</p> <p>Select a Field (Optional): "Diarrhea" OR "Diarrhea" OR "Diarrheas" OR "Diarrheal" OR "diarrhoeal" OR "diarrhoea" OR "diarrhoeas" OR "Dysentery" OR "Dysentery" OR "dysentery" OR "enteritis" OR "enteritides" OR "Cholera" OR "Cholera" OR "Choleras" OR "vibrio Cholerae" OR "Gastroenteritis" OR "gastroenteritis" OR "gastroenteritides" OR "gastro enteritis" OR "gastroduodenitis" OR "gastrointestinal acute infection" OR "gastrointestinal acute</p>                                                                                                                                                                                                                                                                                                                                                                                                                                                                                                                                                                                                                                                                                                                                                                                                                                                                                                                                                                                                                                                                                                                                                                                                                                                                                                                                                                                                                                                                                                                                                                                                                                                                                                                                                                                                                                                                                                                                                                                                                                                                                                                                                                                                                                                                                                                                                                                                                                                                                                                                                                                                                                                                                                                                                                                                                                                                                                                                                                                                                                                                                                                                                                                                                                                                                                                                                                                                                                                                                                                                                                  | January 19, 2018 |

|                                                                                                                                                                                                                                                                                                                                                                                                                                                                                                                                                                                                                                                                                                                                                                                                                                                                                                                                                                                                                                                                                                                                                                                                                                                                                                                                                                                                                                                                                                                                                                                                                                                                                                                                                                                                                                                                                                                                                                                                                                                                                                                                                                                                                                                                                                                                                                                                                                                                                                                                                                                                                                                                                                                                                                                                                                                                                                                                                                                                                                                                                                                                                                                                                                                                                                                                                                                                                                                                                                                                                                                                                                                                                                                                                                                                                                                                                                                                                                                                                                                                                                                                                                                                                                                                                                                                                                                                                                                                                                                                                                                                                                                                                                                                                                                                                                                                                                                                                                                                                                                                                                                                                                                                                                                                                                                                                                                                                                                                                                                                                                                                                                                                                                                                                                                                                                                                                                                                                                                                                                                                                                                                                                                                                                                                                                                                                                                                                                                                                                                                                                                                                                                                                                                                                                                                                                                                                                                                                                                                 |  |
|-------------------------------------------------------------------------------------------------------------------------------------------------------------------------------------------------------------------------------------------------------------------------------------------------------------------------------------------------------------------------------------------------------------------------------------------------------------------------------------------------------------------------------------------------------------------------------------------------------------------------------------------------------------------------------------------------------------------------------------------------------------------------------------------------------------------------------------------------------------------------------------------------------------------------------------------------------------------------------------------------------------------------------------------------------------------------------------------------------------------------------------------------------------------------------------------------------------------------------------------------------------------------------------------------------------------------------------------------------------------------------------------------------------------------------------------------------------------------------------------------------------------------------------------------------------------------------------------------------------------------------------------------------------------------------------------------------------------------------------------------------------------------------------------------------------------------------------------------------------------------------------------------------------------------------------------------------------------------------------------------------------------------------------------------------------------------------------------------------------------------------------------------------------------------------------------------------------------------------------------------------------------------------------------------------------------------------------------------------------------------------------------------------------------------------------------------------------------------------------------------------------------------------------------------------------------------------------------------------------------------------------------------------------------------------------------------------------------------------------------------------------------------------------------------------------------------------------------------------------------------------------------------------------------------------------------------------------------------------------------------------------------------------------------------------------------------------------------------------------------------------------------------------------------------------------------------------------------------------------------------------------------------------------------------------------------------------------------------------------------------------------------------------------------------------------------------------------------------------------------------------------------------------------------------------------------------------------------------------------------------------------------------------------------------------------------------------------------------------------------------------------------------------------------------------------------------------------------------------------------------------------------------------------------------------------------------------------------------------------------------------------------------------------------------------------------------------------------------------------------------------------------------------------------------------------------------------------------------------------------------------------------------------------------------------------------------------------------------------------------------------------------------------------------------------------------------------------------------------------------------------------------------------------------------------------------------------------------------------------------------------------------------------------------------------------------------------------------------------------------------------------------------------------------------------------------------------------------------------------------------------------------------------------------------------------------------------------------------------------------------------------------------------------------------------------------------------------------------------------------------------------------------------------------------------------------------------------------------------------------------------------------------------------------------------------------------------------------------------------------------------------------------------------------------------------------------------------------------------------------------------------------------------------------------------------------------------------------------------------------------------------------------------------------------------------------------------------------------------------------------------------------------------------------------------------------------------------------------------------------------------------------------------------------------------------------------------------------------------------------------------------------------------------------------------------------------------------------------------------------------------------------------------------------------------------------------------------------------------------------------------------------------------------------------------------------------------------------------------------------------------------------------------------------------------------------------------------------------------------------------------------------------------------------------------------------------------------------------------------------------------------------------------------------------------------------------------------------------------------------------------------------------------------------------------------------------------------------------------------------------------------------------------------------------------------------------------------------------------------------------|--|
| <p>infections" OR "gastrointestinal infection" OR "gastrointestinal infections" OR "digestive tract infection" OR "digestive tract infections" OR "digestive infection" OR "gastrointestinal tract infection" OR "gastrointestine tract infection" OR "Pneumonia" OR "pneumonia" OR "pneumonias" OR "pneumonitis" OR "pulmonary inflammation" OR "pulmonary inflammations" OR "lung inflammation" OR "Lung Inflammations" OR "inflammatory lung disease" OR "lobitis" OR "peripneumonia" OR "pleuropneumonia" OR "pleuropneumonitis" OR "pneumonitis" OR "pulmonal inflammation" OR "pulmonary inflammation" OR "pulmonic inflammation" OR "bronchopneumonia" OR "bronchopneumonias" OR "Respiratory Tract Infections" OR "Respiratory Tract Infection" OR "Respiratory Infection" OR "Respiratory Infections" OR "whooping cough" OR "pertussis" OR "pulmonary tract infection" OR "respiration infection" OR "Bronchiolitis" OR "bronchitis" OR "bronchopulmonary infection" OR "Croup" OR "Croup" OR "diphtheria" OR "laryngitis" OR "Severe Acute Respiratory Syndrome" OR "Severe Acute Respiratory Syndrome" OR "SARS" OR "Acute Chest Syndrome" OR "acute chest syndrome" OR "acute chest syndromes" OR "Acute Lower Respiratory Infection" OR "Acute Lower Respiratory Infections" OR "ALRI" OR "LRI" OR "ARI" OR "respiration tract infection" OR "respiration tract infections" OR "legionnaire disease" OR "legionnaires' disease" OR "legionnaires disease" OR "Pontiac fever" OR "lung infiltrate" OR "lung infiltration" OR "pulmonary infiltrate" OR "pulmonary infiltration" OR "pneumonic lung" OR "rds" OR "respiratory distress" OR "respiration distress" OR "Malaria" OR "malaria" OR "malarias" OR "Plasmodium Infection" OR "Plasmodium Infections" OR "Plasmodium falciparum" OR "Plasmodium falciparum" OR "Plasmodium falciparums" OR "malaria, falciparum" OR "blackwater fever" OR "blackwater fevers" OR "black water fever" OR "black water fevers" OR "remittent fever" OR "paludism" OR "plasmodium infection" OR "plasmodium infections" OR "marsh fever" OR "falciparum infection" OR "Plasmodium vivax" OR "Plasmodium vivax" OR "Plasmodium vivax" OR "malaria, vivax" OR "vivax infection" OR "Plasmodium ovale" OR "Plasmodium ovale" OR "Plasmodium ovales" OR "Plasmodium malariae" OR "Meningitis" OR "Meningitis" OR "Meningitis" OR "Meningitides" OR "Pachymeningitis" OR "Pachymeningitides" OR "Arachnoiditis" OR "Arachnoiditides" OR "Arachnoid Membrane inflammation" OR "Arachnoid Membrane inflammations" OR "Meningoencephalitis" OR "Meningoencephalitis" OR "Meningocephalitis" OR "Cerebromeningitis" OR "Encephalomeningitis" OR "Encephalomeningitides" OR "Haemophilus influenzae" OR "Haemophilus parainfluenzae" OR "Cerebromeningitides" OR "Cerebritis" OR "Cerebritides" OR "Waterhouse Friderichsen Syndrome" OR "Waterhouse Friderichsen Syndrome" OR "Waterhouse-Friederichsen Syndrome" OR "Waterhouse-Friederichsen Syndrome" OR "Purpura Fulminans" OR "Meningococcal" OR "Meningeal" OR "Cerebral Cryptococcosis" OR "Cerebral Cryptococcoses" OR "Toruloma" OR "Torulomas" OR "Lymphocytic Choriomeningitis" OR "Armstrong Syndrome" OR "Armstrong's Syndrome" OR "Encephalitis" OR "Encephalitis" OR "Encephalitis" OR "encephalitis" OR "brain inflammation" OR "brain inflammations" OR "Rasmussen syndrome" OR "Rasmussen's syndrome" OR "Cerebral Ventriculitis" OR "Cerebral Ventriculitides" OR "Infectious Ventriculitis" OR "Infectious Ventriculitides" OR "Encephalomyelitis" OR "Meningoencephalitis" OR "Meningoencephalitis" OR "Cerebromeningitis" OR "myeloencephalitis" OR "Lupus Vasculitis" OR "Central Nervous System Lupus" OR "Lupus Erythematosus" OR "Lupus Erythematosus" OR "brain vasculitis" OR "brain angiitis" OR "brain arteritis" OR "cerebral arteritis" OR "cerebral vasculitis" OR "Neisseria meningitidis" OR "Neisseria meningitidis" OR "Neisseria meningitidis" OR "Micrococcus intracellularis" OR "Neisseria weichselbaumi" OR "Meningococcus" OR "meningococemia" OR "meningococci" OR "Meningococcal Infections" OR "meningococcal" OR "meningococcaemia" OR "sepsis" OR "sepsis" OR "Pyemia" OR "Pyemias" OR "Pyohemia" OR "Pyohemias" OR "Pyemia" OR "Pyemias" OR "Septicemia" OR "Septicemias" OR "Blood Poisoning" OR "Blood Poisonings" OR "septic" OR "sepsis" OR "congenital abnormalities" OR "congenital" OR "Deformities" OR "Deformity" OR "Birth Defects" OR "Birth Defect" OR "abnormality" OR "abnormalities" OR "malformation" OR "malformations" OR "malformative" OR "malformed" OR "neural tube defects" OR "neural tube" OR "Craniorachischisis" OR "Craniorachischises" OR "Diastematomyelia" OR "Diastematomyelias" OR "Tethered Cord" OR "Spinal Dysraphism" OR "Tethered Spinal Cord" OR "Spinal Dysraphisms" OR "Iniencephaly" OR "Iniencephalies" OR "Neurenteric" OR "Neuroenteric" OR "Spinal Cord Myelodysplasia" OR "Spinal Cord Myelodysplasias" OR "Acrania" OR "Acrania" OR "Exencephaly" OR "Exencephalies" OR "dysgraphia" OR "dysraphic" OR "dysraphism" OR "dysraphy" OR "NTD" OR "NTDS" OR "sudden infant death syndrome" OR "sudden infant death" OR "sid" OR "SIDS" OR "cot death" OR "cot deaths" OR "crib death" OR "fetal alcohol spectrum disorders" OR "Fetal alcohol spectrum" OR "Foetal alcohol spectrum" OR "FASD" OR "FASDs" OR "Fetal Alcohol Syndrome" OR "Alcohol-Related Birth Defects" OR "Alcohol Related Birth Defects" OR "Alcohol Related Neurodevelopmental Disorder" OR "FAE" OR "Fetal Alcohol Effects" OR "FAEs" OR "Fetal Alcohol Syndrome" OR "Fetus Alcohol Syndrome" OR "Foetal alcohol syndrome" OR "premature birth" OR "premature" OR "preterm" OR "pre-mature" OR "pre-term" OR "prematurity" OR "prematunitas" OR "asphyxia" OR "asphyxia" OR "Asphyxia Neonatorum" OR "Asphyxia Neonatorum" OR "hypoxia" OR "Asphyxias" OR "Suffocation" OR "Suffocations" OR "anoxia" OR ("intrapartum" AND "related") OR "tetanus" OR "tetanus" OR "tetani" OR "diphtheria-tetanus-pertussis" OR "rubella" OR "rubella" OR "measles" OR "epidemic roseola" OR "necrosis" OR "necrosis" OR "necrotic" OR "necroses" OR "necrotizing" OR "Infarction" OR "infarctions" OR "birth injuries" OR "birth injuries" OR "birth injury" OR "birth trauma" OR "Obstetric Paralyzes" OR "Obstetric Paralysis" OR "Obstetrical Paralyzes" OR "Obstetrical Paralysis" OR "birth damage" OR "birth lesion" OR "birth palsy" OR "birth paralysis" OR "obstetric palsy" OR "obstetrical palsy" OR "brachial palsy" OR "brachial paralysis" OR "brachial plexus paralysis" OR "delivery trauma" OR "arm paralysis" OR "paralysis brachialis" OR "jaundice" OR "jaundice" OR "jaundices" OR "Icterus" OR "bronze baby syndrome" OR "erythroleukoblastosis" OR "hemorrhage" OR "hemorrhage" OR "haemorrhage" OR "haemorrhagic" OR "Hemorrhagic" OR "Nutrition disorders" OR "malnutrition" OR "Nutritional" OR "Undernutrition" OR</p> |  |
|-------------------------------------------------------------------------------------------------------------------------------------------------------------------------------------------------------------------------------------------------------------------------------------------------------------------------------------------------------------------------------------------------------------------------------------------------------------------------------------------------------------------------------------------------------------------------------------------------------------------------------------------------------------------------------------------------------------------------------------------------------------------------------------------------------------------------------------------------------------------------------------------------------------------------------------------------------------------------------------------------------------------------------------------------------------------------------------------------------------------------------------------------------------------------------------------------------------------------------------------------------------------------------------------------------------------------------------------------------------------------------------------------------------------------------------------------------------------------------------------------------------------------------------------------------------------------------------------------------------------------------------------------------------------------------------------------------------------------------------------------------------------------------------------------------------------------------------------------------------------------------------------------------------------------------------------------------------------------------------------------------------------------------------------------------------------------------------------------------------------------------------------------------------------------------------------------------------------------------------------------------------------------------------------------------------------------------------------------------------------------------------------------------------------------------------------------------------------------------------------------------------------------------------------------------------------------------------------------------------------------------------------------------------------------------------------------------------------------------------------------------------------------------------------------------------------------------------------------------------------------------------------------------------------------------------------------------------------------------------------------------------------------------------------------------------------------------------------------------------------------------------------------------------------------------------------------------------------------------------------------------------------------------------------------------------------------------------------------------------------------------------------------------------------------------------------------------------------------------------------------------------------------------------------------------------------------------------------------------------------------------------------------------------------------------------------------------------------------------------------------------------------------------------------------------------------------------------------------------------------------------------------------------------------------------------------------------------------------------------------------------------------------------------------------------------------------------------------------------------------------------------------------------------------------------------------------------------------------------------------------------------------------------------------------------------------------------------------------------------------------------------------------------------------------------------------------------------------------------------------------------------------------------------------------------------------------------------------------------------------------------------------------------------------------------------------------------------------------------------------------------------------------------------------------------------------------------------------------------------------------------------------------------------------------------------------------------------------------------------------------------------------------------------------------------------------------------------------------------------------------------------------------------------------------------------------------------------------------------------------------------------------------------------------------------------------------------------------------------------------------------------------------------------------------------------------------------------------------------------------------------------------------------------------------------------------------------------------------------------------------------------------------------------------------------------------------------------------------------------------------------------------------------------------------------------------------------------------------------------------------------------------------------------------------------------------------------------------------------------------------------------------------------------------------------------------------------------------------------------------------------------------------------------------------------------------------------------------------------------------------------------------------------------------------------------------------------------------------------------------------------------------------------------------------------------------------------------------------------------------------------------------------------------------------------------------------------------------------------------------------------------------------------------------------------------------------------------------------------------------------------------------------------------------------------------------------------------------------------------------------------------------------------------------------------------------------------------------------------------------------|--|



|                                                                                                                                                                                                                                                                                                                                                                                                                                                                                                                                                                                                                                                                                                                                                                                                                                                                                                                                                                                                                                                                                                                                                                                                                                                                                                                                                                                                                                                                                                                                                                                                                                                                                                                                                                                                                                                                                                                                                                                                                                                                                                                                                                                                                                                                                                                                                                                                                                                                                                                                                                                                                                                                                                                                                                                                                                                                                                                                                                                                                                                                                                                                                                                                                                                                                                                                                                                                                                                                                                                                                                                                                                                                                                                                                                                                                                                                                                                                                                                                                                                                                                                                                                |  |
|----------------------------------------------------------------------------------------------------------------------------------------------------------------------------------------------------------------------------------------------------------------------------------------------------------------------------------------------------------------------------------------------------------------------------------------------------------------------------------------------------------------------------------------------------------------------------------------------------------------------------------------------------------------------------------------------------------------------------------------------------------------------------------------------------------------------------------------------------------------------------------------------------------------------------------------------------------------------------------------------------------------------------------------------------------------------------------------------------------------------------------------------------------------------------------------------------------------------------------------------------------------------------------------------------------------------------------------------------------------------------------------------------------------------------------------------------------------------------------------------------------------------------------------------------------------------------------------------------------------------------------------------------------------------------------------------------------------------------------------------------------------------------------------------------------------------------------------------------------------------------------------------------------------------------------------------------------------------------------------------------------------------------------------------------------------------------------------------------------------------------------------------------------------------------------------------------------------------------------------------------------------------------------------------------------------------------------------------------------------------------------------------------------------------------------------------------------------------------------------------------------------------------------------------------------------------------------------------------------------------------------------------------------------------------------------------------------------------------------------------------------------------------------------------------------------------------------------------------------------------------------------------------------------------------------------------------------------------------------------------------------------------------------------------------------------------------------------------------------------------------------------------------------------------------------------------------------------------------------------------------------------------------------------------------------------------------------------------------------------------------------------------------------------------------------------------------------------------------------------------------------------------------------------------------------------------------------------------------------------------------------------------------------------------------------------------------------------------------------------------------------------------------------------------------------------------------------------------------------------------------------------------------------------------------------------------------------------------------------------------------------------------------------------------------------------------------------------------------------------------------------------------------------------|--|
| <p>"Malnourishment" OR "Malnourishments" OR "Deficiency" OR "Deficiencies" OR "Refeeding Syndrome" OR "Starvation" OR "Starvations" OR "Famine" OR "Famines" OR "deficient" OR "underfeeding" OR "undernourishment" OR "nutrition" OR "Hypervitaminosis" OR "Noncommunicable Diseases" OR "Noncommunicable" OR "Non-communicable" OR "communicable" OR "non-infectious" OR "infectious" OR "noninfectious" OR "Communicable Diseases" OR "Infant, Newborn, Diseases" OR "newborn" OR "neonatal" OR "perinatal"</p> <p>AND</p> <p>Select a Field (Optional): "Argentina" OR "Bolivia" OR "Brazil" OR "Brasil" OR "Chile" OR "Colombia" OR "Ecuador" OR "French Guiana" OR "Guyana" OR "Paraguay" OR "Peru" OR "Suriname" OR "Uruguay" OR "Venezuela" OR "Mexico" OR "Belize" OR "Costa Rica" OR "El Salvador" OR "Guatemala" OR "Honduras" OR "Nicaragua" OR "Puerto Rico" OR "Panama" OR "West Indies" OR "Antigua" OR "Barbuda" OR "Bahamas" OR "Barbados" OR "Cuba" OR "Dominica" OR "Dominican Republic" OR "Grenada" OR "Guadeloupe" OR "Haiti" OR "Jamaica" OR "Martinique" OR "Antilles" OR "Anguilla" OR "Saint Kitts" OR "St Kitts" OR "Saint Lucia" OR "St Lucia" OR "Saint Vincent" OR "St Vincent" OR "Trinidad" OR "Tobago" OR "Virgin Islands" OR "Kazakhstan" OR "Kyrgyzstan" OR "Tajikistan" OR "Turkmenistan" OR "Uzbekistan" OR "Borneo" OR "Brunei" OR "Cambodia" OR "East Timor" OR "Indonesia" OR "Laos" OR "Malaysia" OR "Mekong Valley" OR "Myanmar" OR "Burma" OR "Philippines" OR "Singapore" OR "Thailand" OR "Vietnam" OR "Bangladesh" OR "Bhutan" OR "India" OR "Nepal" OR "Pakistan" OR "Sri Lanka" OR "China" OR "Korea" OR "Macao" OR "Macau" OR "Mongolia" OR "Taiwan" OR "Afghanistan" OR "Bahrain" OR "Iran" OR "Iraq" OR "Israel" OR "Jordan" OR "Kuwait" OR "Lebanon" OR "Oman" OR "Qatar" OR "Saudi Arabia" OR "Syria" OR "Turkey" OR "United Arab Emirates" OR "Yemen" OR "Fiji" OR "New Caledonia" OR "Papua New Guinea" OR "Vanuatu" OR "Micronesia" OR "Melanesia" OR "Guam" OR "Palau" OR "Polynesia" OR "Samoa" OR "Tonga" OR "Armenia" OR "Azerbaijan" OR "Georgia" OR "Albania" OR "Estonia" OR "Latvia" OR "Lithuania" OR "Bosnia" OR "Herzegovina" OR "Serbia" OR "Bulgaria" OR "Belarus" OR "Croatia" OR "Czech Republic" OR "Hungary" OR "Macedonia" OR "Moldova" OR "Montenegro" OR "Poland" OR "Romania" OR "Russia" OR "Bashkiria" OR "Dagestan" OR "Slovakia" OR "Slovenia" OR "Ukraine" OR "Cameroon" OR "Central African Republic" OR "Chad" OR "Congo" OR "Equatorial Guinea" OR "Gabon" OR "Burundi" OR "Djibouti" OR "Eritrea" OR "Ethiopia" OR "Kenya" OR "Rwanda" OR "Somalia" OR "Sudan" OR "Tanzania" OR "Uganda" OR "Angola" OR "Botswana" OR "Lesotho" OR "Malawi" OR "Mozambique" OR "Namibia" OR "South Africa" OR "Swaziland" OR "Zambia" OR "Zimbabwe" OR "Benin" OR "Burkina Faso" OR "Cote d'Ivoire" OR "Gambia" OR "Ghana" OR "Guinea" OR "Guinea-Bissau" OR "Liberia" OR "Mali" OR "Mauritania" OR "Niger" OR "Nigeria" OR "Senegal" OR "Sierra Leone" OR "Togo" OR "Algeria" OR "Egypt" OR "Libya" OR "Morocco" OR "Tunisia" OR "Comoros" OR "Madagascar" OR "Mauritius" OR "Reunion" OR "Seychelles" OR "Cabo Verde" OR "Kiribati" OR "Marshall Islands" OR "Nauru" OR "Niue" OR "Sao Tome" OR "Solomon Islands" OR "South Sudan" OR "Developing Countries" OR "Developing" OR "Least Developed" OR "Less-Developed" OR "Less Developed" OR "Under-Developed" OR "Under Developed" OR "UnderDeveloped" OR "third-world" OR "third world" OR "Africa" OR "Africa" OR "Caribbean Region" OR "Caribbean Region" OR "West Indies" OR "Pacific Islands" OR "Pacific Islands" OR "Micronesia" OR "Melanesia" OR "Polynesia" OR "Mexico" OR "Mexico" OR "Latin America" OR "Latin America" OR "South America" OR "South America" OR "Indian Ocean Islands" OR "Indian Ocean Islands" OR "Pemba" OR "Cocos" OR "Maldives" OR "Central America" OR "Central America" OR "Asia" OR "Asia" OR "far east" OR "eastern europe" OR "eastern europe" OR "province" OR "district" OR "districts" OR "prefecture" OR "prefectures" OR "county" OR "counties" OR "municipality" OR "municipalities"</p> |  |
|----------------------------------------------------------------------------------------------------------------------------------------------------------------------------------------------------------------------------------------------------------------------------------------------------------------------------------------------------------------------------------------------------------------------------------------------------------------------------------------------------------------------------------------------------------------------------------------------------------------------------------------------------------------------------------------------------------------------------------------------------------------------------------------------------------------------------------------------------------------------------------------------------------------------------------------------------------------------------------------------------------------------------------------------------------------------------------------------------------------------------------------------------------------------------------------------------------------------------------------------------------------------------------------------------------------------------------------------------------------------------------------------------------------------------------------------------------------------------------------------------------------------------------------------------------------------------------------------------------------------------------------------------------------------------------------------------------------------------------------------------------------------------------------------------------------------------------------------------------------------------------------------------------------------------------------------------------------------------------------------------------------------------------------------------------------------------------------------------------------------------------------------------------------------------------------------------------------------------------------------------------------------------------------------------------------------------------------------------------------------------------------------------------------------------------------------------------------------------------------------------------------------------------------------------------------------------------------------------------------------------------------------------------------------------------------------------------------------------------------------------------------------------------------------------------------------------------------------------------------------------------------------------------------------------------------------------------------------------------------------------------------------------------------------------------------------------------------------------------------------------------------------------------------------------------------------------------------------------------------------------------------------------------------------------------------------------------------------------------------------------------------------------------------------------------------------------------------------------------------------------------------------------------------------------------------------------------------------------------------------------------------------------------------------------------------------------------------------------------------------------------------------------------------------------------------------------------------------------------------------------------------------------------------------------------------------------------------------------------------------------------------------------------------------------------------------------------------------------------------------------------------------------------------|--|

## Appendix 2: Updated study data points

Appendix 2. Updated study data points in 2000-2019

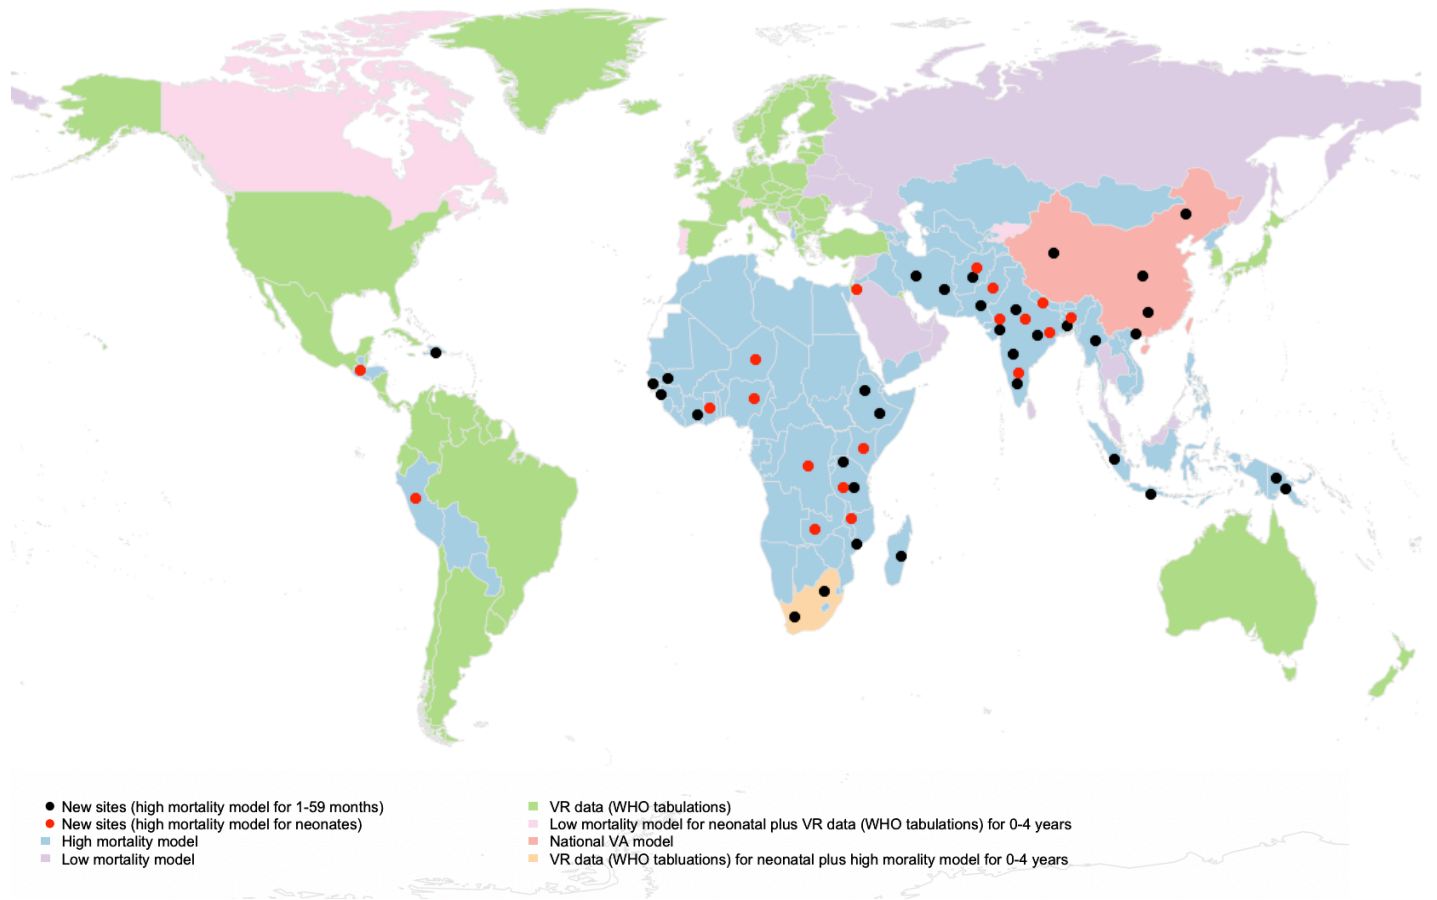

# Appendix 3: Method details

ICD codes and cause of death

## Appendix 3. Details of methods used to estimate causes of death in children younger than five years in 2000-2019

### 1. ICD codes and cause of death categories

| MCEE cause name                                                        | ICD-10 code                                                                                                                                                                                                                         | ICD-9 code                                                                                                                                          |
|------------------------------------------------------------------------|-------------------------------------------------------------------------------------------------------------------------------------------------------------------------------------------------------------------------------------|-----------------------------------------------------------------------------------------------------------------------------------------------------|
| <b>All causes</b>                                                      | A00-Y89                                                                                                                                                                                                                             | 001-999                                                                                                                                             |
| <b>I. Communicable, maternal, neonatal and nutritional conditions*</b> | A00-B99, D50-D53, D64.9, E00- E02, E40-E64, G00, G03-G04, H65-H66, J00-J22, J85, N30, N34, N390, N70-N73, O00-P96, U04                                                                                                              | 001- 139, 243, 260- 269, 279.5- 279.6, 280, 281, 285.9, 320- 323, 381- 382, 460- 466, 480- 487, 513, 614- 616, 630- 676, 760- 779                   |
| HIV/AIDS                                                               | B20-B24                                                                                                                                                                                                                             | 279.5-279.6, 042                                                                                                                                    |
| Diarrhoea diseases                                                     | A00-A09                                                                                                                                                                                                                             | 001-009                                                                                                                                             |
| Tetanus                                                                | A33-A35                                                                                                                                                                                                                             | 33                                                                                                                                                  |
| Measles                                                                | B05                                                                                                                                                                                                                                 | 55                                                                                                                                                  |
| Meningitis/Encephalitis                                                | A39, A83, A84-A87, G00, G03, G04                                                                                                                                                                                                    | 036, 047, 062-064, 320-322                                                                                                                          |
| Malaria                                                                | B50-B54, P373, P374                                                                                                                                                                                                                 | 84                                                                                                                                                  |
| ARI                                                                    | H65-H66, J00-J22, J85, P23                                                                                                                                                                                                          | 460- 466, 480- 487, 381- 382, 513, 770.0                                                                                                            |
| Preterm birth complications                                            | P01.0, P01.1, P07, P22, P25-P28, P61.2, P77                                                                                                                                                                                         | 761.0-761.1, 765, 769, 770.2- 770.9, 772.1, 774.2, 776.6, 777.5- 777.6                                                                              |
| Intrapartum-related complications                                      | P01.7-P02.1, P02.4-P02.6, P03, P10-P15, P20-P21, P24, P50, P90-P91                                                                                                                                                                  | 761.7-762.1, 762.4-762.6, 763, 767-768, 770.1, 772.2, 779.0- 779.2                                                                                  |
| Sepsis and other infectious conditions of the newborn                  | P35-P39 (excluding P37.3, P37.4)                                                                                                                                                                                                    | 771.0-771.2, 771.4-771.8                                                                                                                            |
| Other Group II                                                         | Remainder                                                                                                                                                                                                                           | Remainder                                                                                                                                           |
| <b>II. Noncommunicable diseases</b>                                    | C00-C97, D00-D48, D55-D64 (exclude D 64.9), D65- D89, E03- E34, E65-E88, F01-F99, G06- G98, H00- H61, H68- H93, I00- I99, J30-J84, J86-J98, K00- K92, L00-L98, M00-M99, N00-N28, N31-N32, N35-N64 (exclude N39.0), N75-N98, Q00-Q99 | 140- 242, 244- 259, 270- 279, 282- 285, 286- 319, 324- 380, 383- 459, 470- 478, 490- 512, 514-611, 617- 629, 680- 759 (exclude 279.5- 279.6, 285.9) |
| Congenital abnormalities                                               | Q00-Q99                                                                                                                                                                                                                             | 740-759                                                                                                                                             |
| Other Group II                                                         | Remainder                                                                                                                                                                                                                           | Remainder                                                                                                                                           |
| <b>III. Injuries</b>                                                   | V01-Y89                                                                                                                                                                                                                             | E800-E999                                                                                                                                           |

**Methods neonatal mortality**

## 2. Methods 0-1 months

Models were estimated for the distribution of cause-specific neonatal mortality assuming a multinomial likelihood of deaths by cause. Reported causes were translated to causes of interest with the misclassification matrix, allowing for variable definition of “other” or residual causes across studies (for example not all studies report neonatal deaths due to diarrhea). Non-informative normal priors were used for multinomial regression coefficients that were not constrained by LASSO parameter  $\lambda$ . Parameter constrained by  $\lambda$  had double exponential priors with mean 0.

| Model; iterations                      | Covariates not constrained by $\lambda$                                                               | Covariates constrained by $\lambda$                                                                                                                                                                                                                                                                                                                                                                              | Final $\lambda$ | Priors                                                                                                                                                                                                                        |
|----------------------------------------|-------------------------------------------------------------------------------------------------------|------------------------------------------------------------------------------------------------------------------------------------------------------------------------------------------------------------------------------------------------------------------------------------------------------------------------------------------------------------------------------------------------------------------|-----------------|-------------------------------------------------------------------------------------------------------------------------------------------------------------------------------------------------------------------------------|
| Low mortality (early); 1000 iterations | Intercept                                                                                             | Gross national income (gni), fertility rate (gfr), Gini coefficient (gini), under-five mortality rate (u5mr), neonatal mortality rate (nmr), rate of low-weight births (lbwrate), DPT inoculation (dpt), antenatal care coverage (anc), women's literacy (femlit)                                                                                                                                                | 325             | Beta (unconstrained): Normal(0, precision 4)<br><br>Beta (constrained): Double exponential(0, $\lambda$ )<br><br>Random effects: Normal(0, precision 1/sd <sup>2</sup> )<br><br>Random effect sd: Uniform(0, SD limit = 0.07) |
| Low mortality (late); 1000 iterations  | Intercept                                                                                             | Gross national income (gni), Fertility rate (gfr), Gini coefficient (gini), under-five mortality rate (u5mr), neonatal mortality rate (nmr), rate of low-weight births (lbwrate), DPT inoculation (dpt), antenatal care coverage (anc), women's literacy (femlit)                                                                                                                                                | 400             | Beta (unconstrained): Normal(0, precision 4)<br><br>Beta (constrained): Double exponential(0, $\lambda$ )<br><br>Random effects: Normal(0, precision 1/sd <sup>2</sup> )<br><br>Random effect sd: Uniform(0, SD limit = 0.07) |
| High mortality; 15000 iterations       | Intercept, reported for early neonatal death (per.early), reported for late neonatal death (per.late) | under-five mortality rate (u5mr), neonatal mortality rate (nmr), DPT inoculation (dpt), fertility rate (gfr), rate of low-weight births (lbwrate), skilled birth attendance (sba), BCG inoculation (bcg), maternal tetanus inoculation (pab), women's literacy (femlit), sub-Saharan Africa region (regSSA), Southeast Asia region (regSA), study distinguishes between preterm and low-birth weight (prevvslbw) | 225             | Beta (unconstrained): Normal(0, precision 4)<br><br>Beta (constrained): Double exponential(0, $\lambda$ )<br><br>Random effects: Normal(0, precision 1/sd <sup>2</sup> )<br><br>Random effect sd: Uniform(0, SD limit)        |

## 2.1 Low mortality early neonatal mortality model

Cross validation error to select Lambda for low mortality early neonatal model –Lambda 325

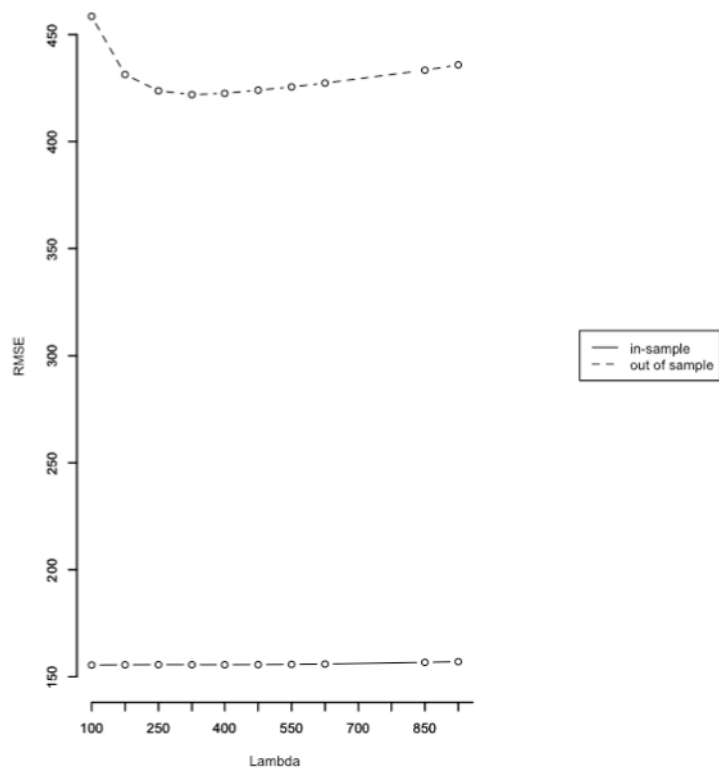

Coefficient estimates for low mortality early neonatal model (reference preterm birth complications)

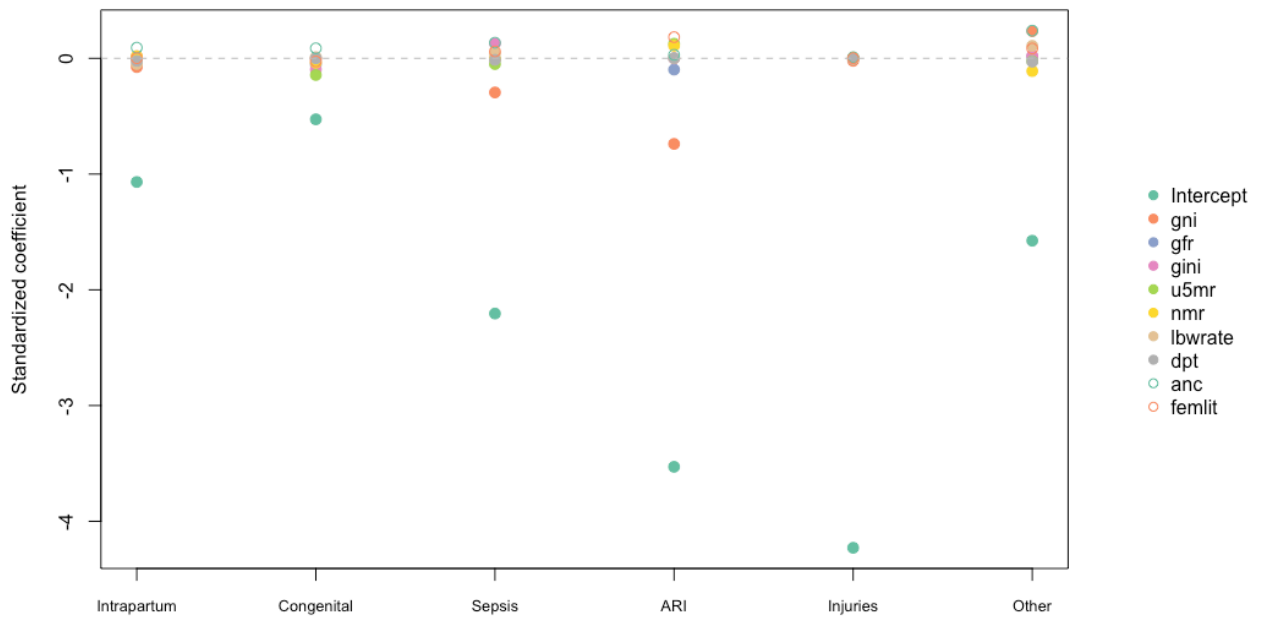



## 2.2 Low mortality late neonatal mortality model

Cross validation error to select Lambda for low mortality late neonatal model – Lambda 400

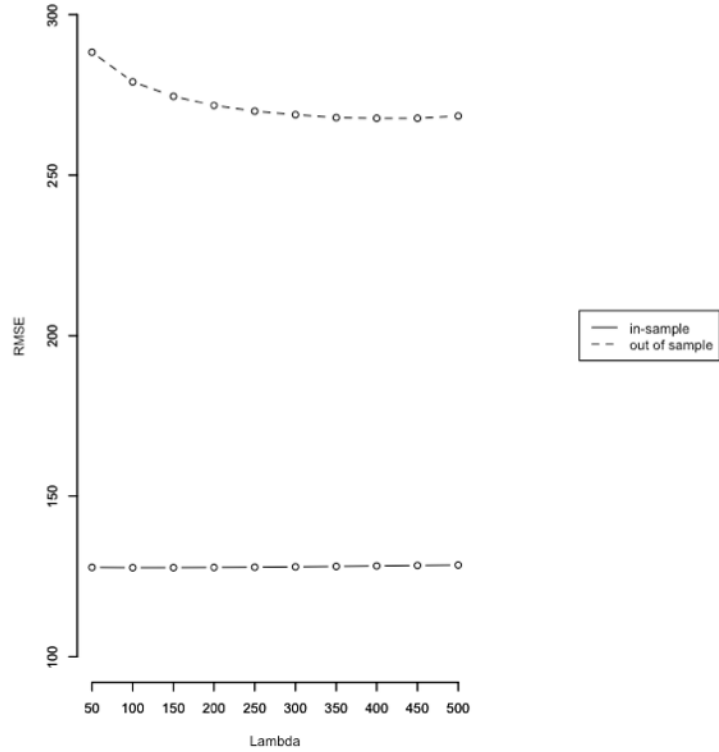

Coefficient estimates for low mortality late neonatal model (reference preterm birth complications)

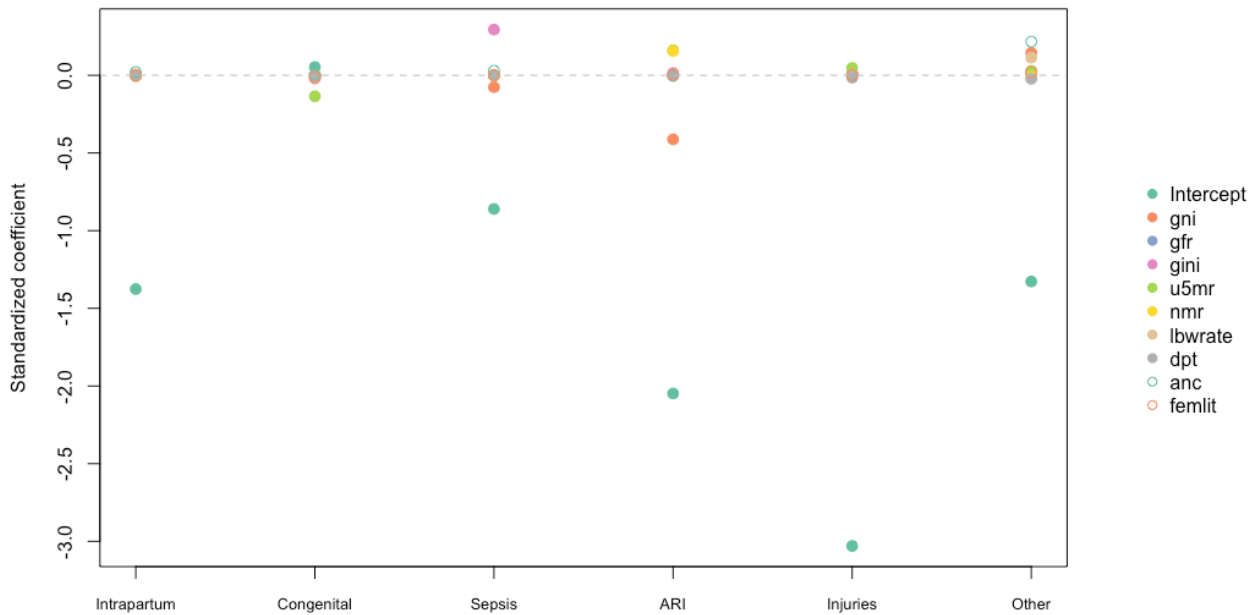

### 2.3 Neonatal high mortality model

Cross validation error to select Lambda for neonatal high mortality model – Lambda 225

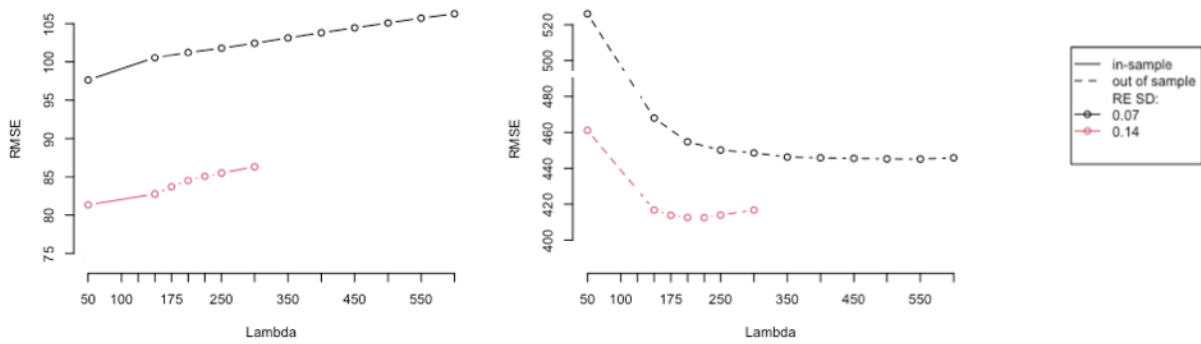

Coefficient estimates for neonatal high mortality model (reference intrapartum)

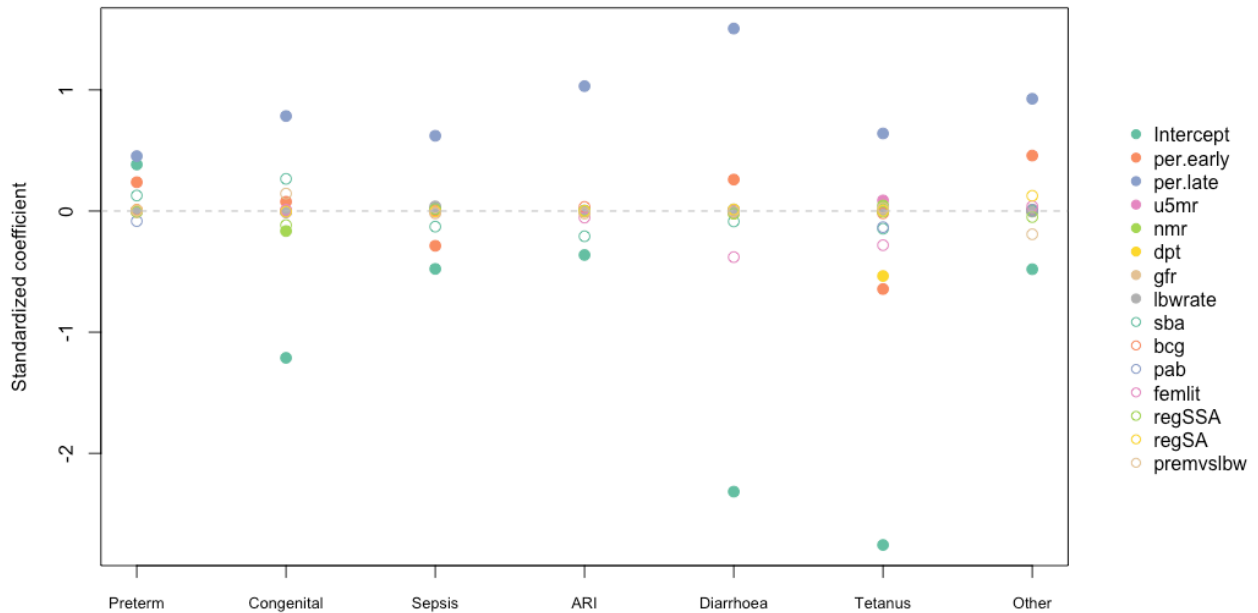

**Methods 1-59 month mortality**

### 3. Methods 1-59 months

Models were estimated for the distribution of cause-specific mortality among 1-59 month olds assumed a multinomial likelihood of deaths by cause. Reported causes were translated to causes of interest with the misclassification matrix, allowing for variable definition of “other” or residual causes across studies (for example not all studies report deaths due to deaths due to malaria). Non-informative normal priors were used for multinomial regression coefficients that were not constrained by LASSO parameter  $\lambda$ . Parameter constrained by  $\lambda$  had double exponential priors with mean 0.

| <b>Model; iterations</b>         | <b>Covariates not constrained by <math>\lambda</math></b>                       | <b>Covariates constrained by <math>\lambda</math></b>                                                                                                                                                                                                                                                                               | <b>Final <math>\lambda</math></b> | <b>Priors</b>                                                                                                                                                                                                                 |
|----------------------------------|---------------------------------------------------------------------------------|-------------------------------------------------------------------------------------------------------------------------------------------------------------------------------------------------------------------------------------------------------------------------------------------------------------------------------------|-----------------------------------|-------------------------------------------------------------------------------------------------------------------------------------------------------------------------------------------------------------------------------|
| Low mortality; 30000 iterations  | Intercept                                                                       | Indicator of Eastern Mediterranean region, year, log under five mortality rate, log purchasing power parity, percent of population with piped water, percent of population with Hib vaccination, percent of population with skilled birth attendant                                                                                 | 5                                 | Beta (unconstrained): Normal(0, precision 4)<br><br>Beta (constrained): Double exponential(0, $\lambda$ )<br><br>Random effects: Normal(0, precision 1/sd <sup>2</sup> )<br><br>Random effect sd: Uniform(0, SD limit = 0.07) |
| High mortality; 15000 iterations | Intercept, reported for infants and children older than one month (lagelower_1) | under-five mortality rate (u5mr), plasmodium falciparum prevalence rate (pfpr), whether country/study area was experiencing meningitis outbreak(meningitis_epi), gross national income (gni), measles vaccine coverage (mcv), year (yr_mid), prevalence of underwt among under-fives (underwt), coverage of sanitation (sanitation) | 10                                | Beta (unconstrained): Normal(0, precision 4)<br><br>Beta (constrained): Double exponential(0, $\lambda$ )<br><br>Random effects: Normal(0, precision 1/sd <sup>2</sup> )<br><br>Random effect sd: Uniform(0, SD limit)        |

### 3. Methods 1-59 months

Models were estimated for the distribution of cause-specific mortality among 1-59 month olds assumed a multinomial likelihood of deaths by cause. Reported causes were translated to causes of interest with the misclassification matrix, allowing for variable definition of “other” or residual causes across studies (for example not all studies report deaths due to deaths due to malaria). Non-informative normal priors were used for multinomial regression coefficients that were not constrained by LASSO parameter  $\lambda$ . Parameter constrained by  $\lambda$  had double exponential priors with mean 0.

| <b>Model; iterations</b>         | <b>Covariates not constrained by <math>\lambda</math></b>                       | <b>Covariates constrained by <math>\lambda</math></b>                                                                                                                                                                                                                                                                               | <b>Final <math>\lambda</math></b> | <b>Priors</b>                                                                                                                                                                                                                 |
|----------------------------------|---------------------------------------------------------------------------------|-------------------------------------------------------------------------------------------------------------------------------------------------------------------------------------------------------------------------------------------------------------------------------------------------------------------------------------|-----------------------------------|-------------------------------------------------------------------------------------------------------------------------------------------------------------------------------------------------------------------------------|
| Low mortality; 30000 iterations  | Intercept                                                                       | Indicator of Eastern Mediterranean region, year, log under five mortality rate, log purchasing power parity, percent of population with piped water, percent of population with Hib vaccination, percent of population with skilled birth attendant                                                                                 | 5                                 | Beta (unconstrained): Normal(0, precision 4)<br><br>Beta (constrained): Double exponential(0, $\lambda$ )<br><br>Random effects: Normal(0, precision 1/sd <sup>2</sup> )<br><br>Random effect sd: Uniform(0, SD limit = 0.07) |
| High mortality; 15000 iterations | Intercept, reported for infants and children older than one month (lagelower_1) | under-five mortality rate (u5mr), plasmodium falciparum prevalence rate (pfpr), whether country/study area was experiencing meningitis outbreak(meningitis_epi), gross national income (gni), measles vaccine coverage (mcv), year (yr_mid), prevalence of underwt among under-fives (underwt), coverage of sanitation (sanitation) | 10                                | Beta (unconstrained): Normal(0, precision 4)<br><br>Beta (constrained): Double exponential(0, $\lambda$ )<br><br>Random effects: Normal(0, precision 1/sd <sup>2</sup> )<br><br>Random effect sd: Uniform(0, SD limit)        |

### 3.2 1-59 month high mortality model

Cross validation error to select Lambda for 1-59 month high mortality model – Lambda 10

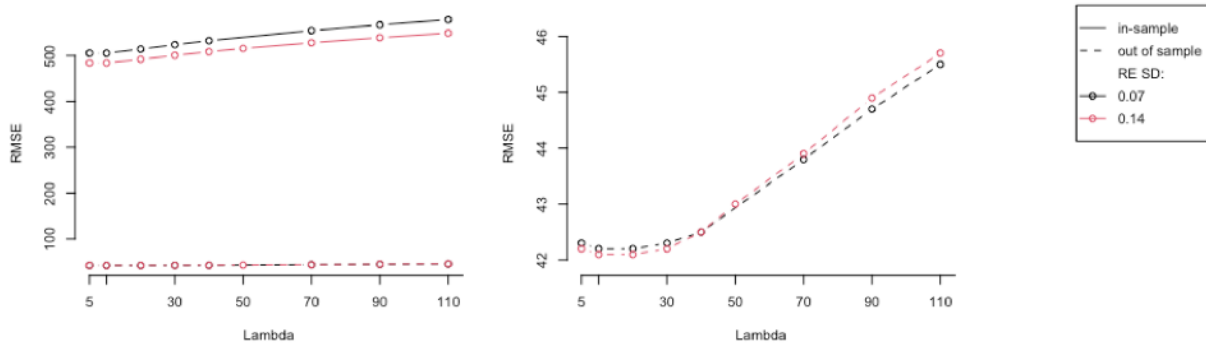

Coefficient estimates for 1-59 month high mortality model (reference ARI)

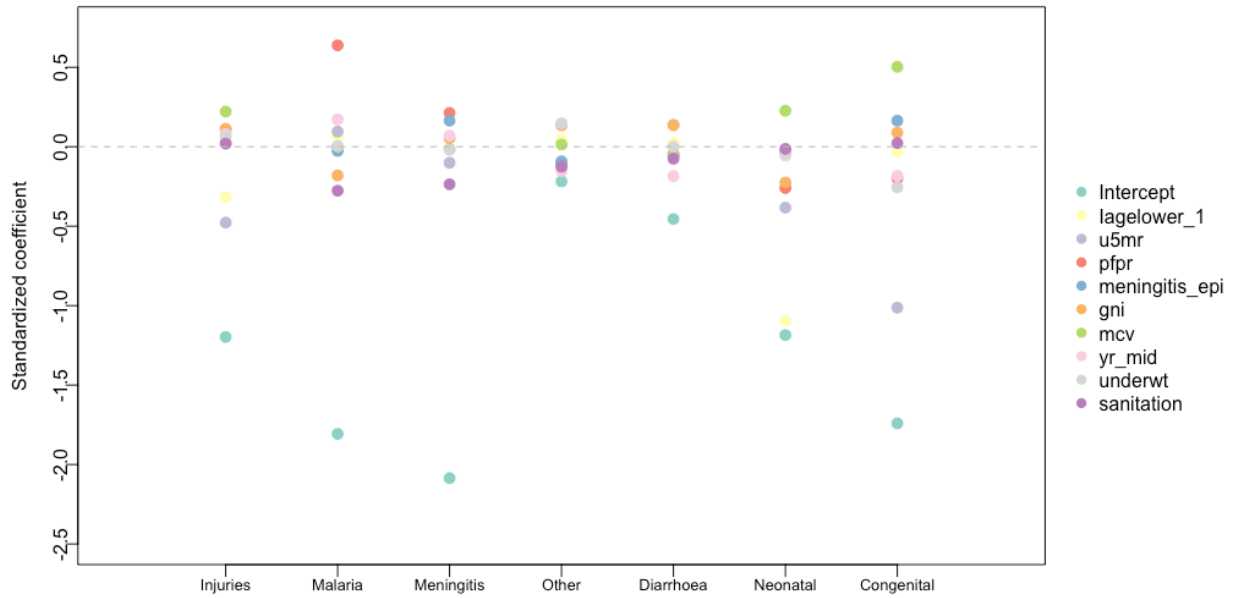



## Appendix 4: Weight of random effects in nationally representative studies



# Nigeria

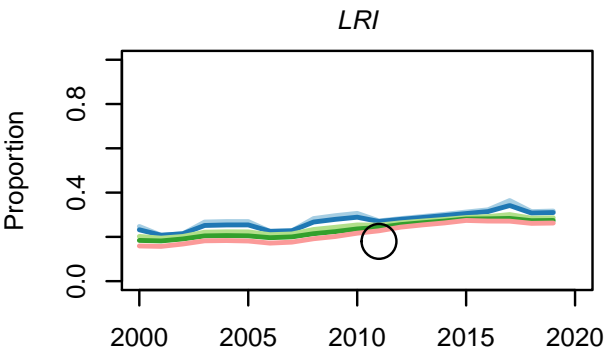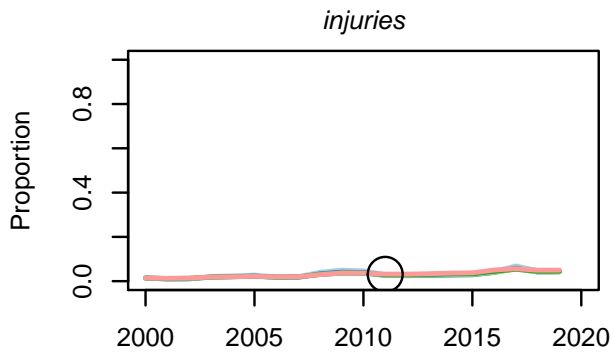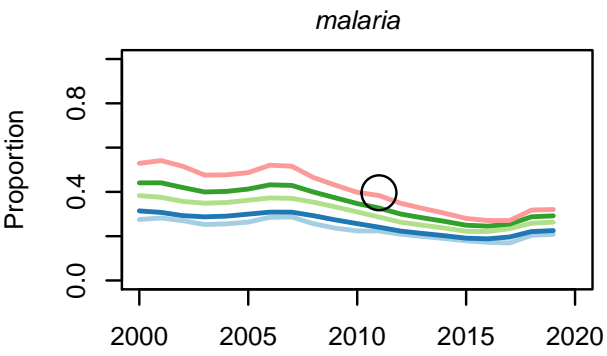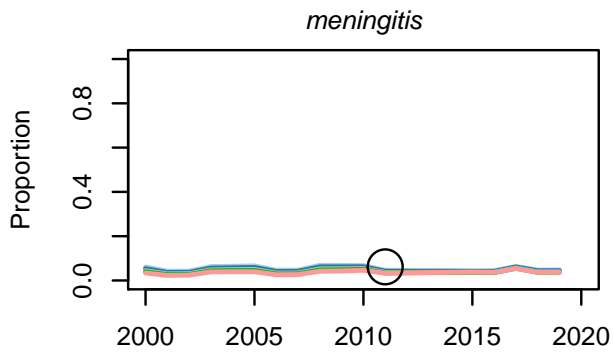

Modeled fraction  
RE SD

- 0.04
- 0.07
- 0.14
- 0.21
- 0.35

○ Measured fraction

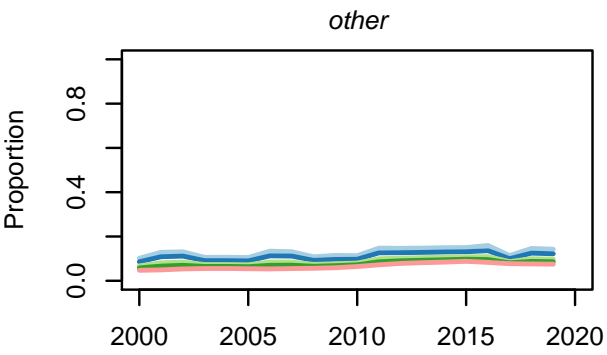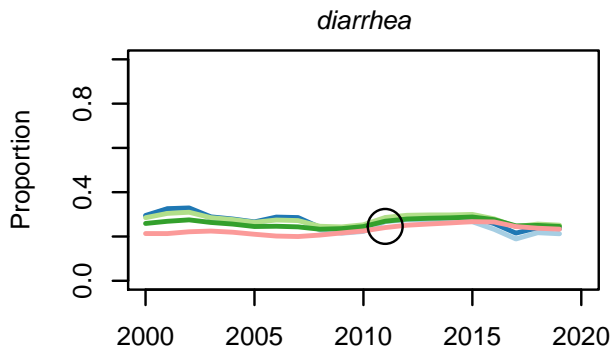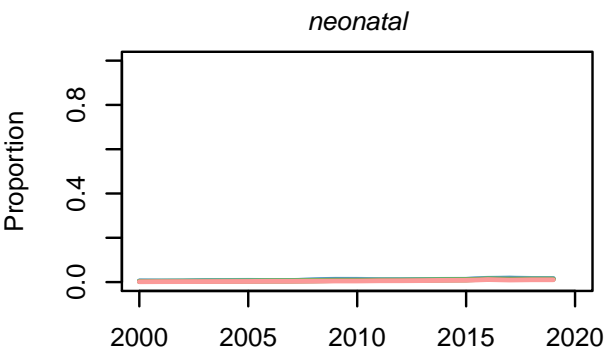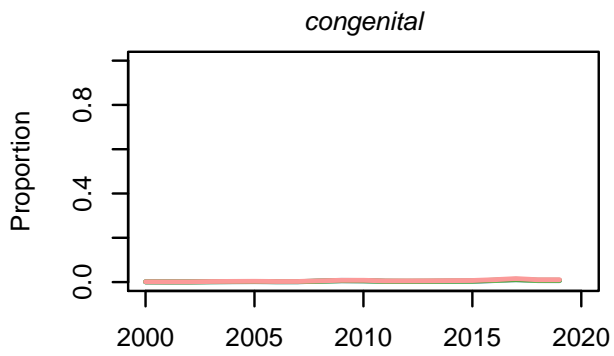

# Pakistan

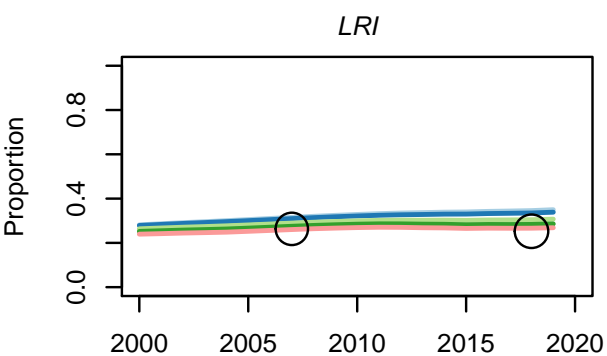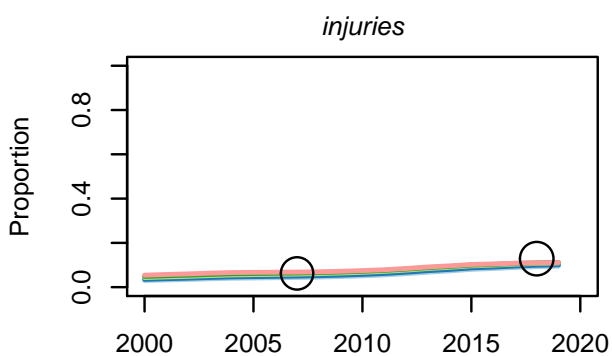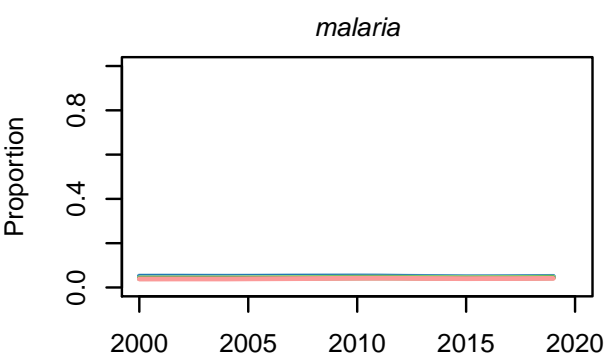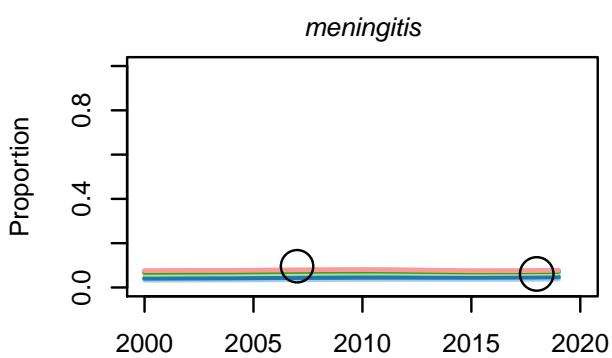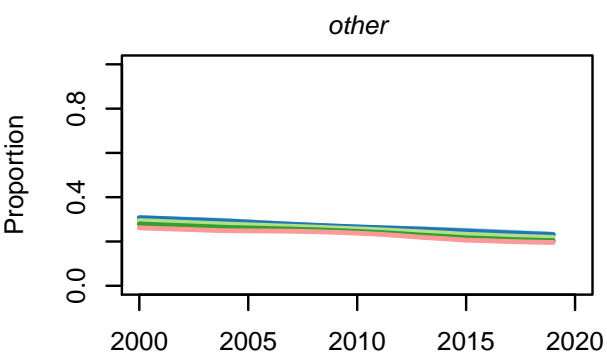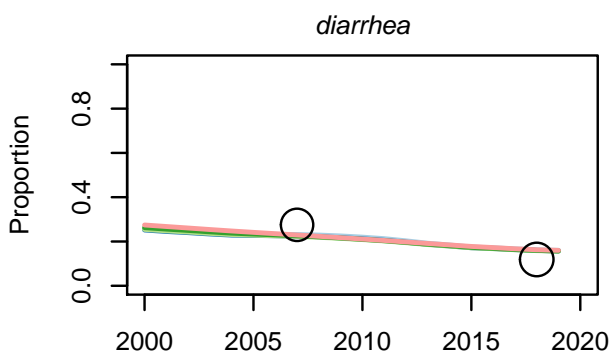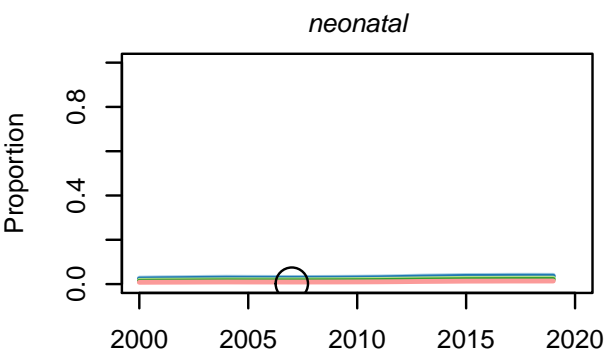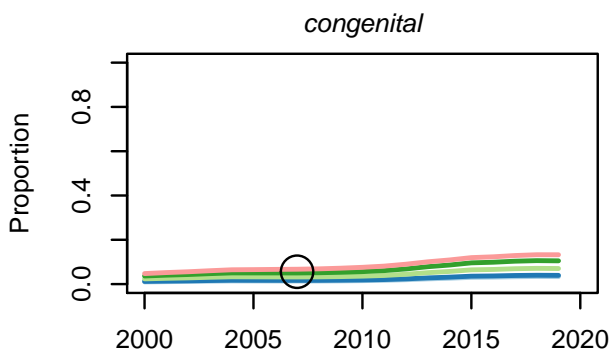

Modeled fraction  
RE SD

- 0.04
- 0.07
- 0.14
- 0.21
- 0.35

○ Measured fraction

# United Republic of Tanzania

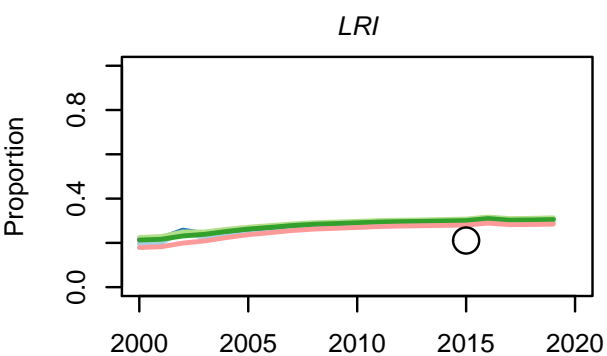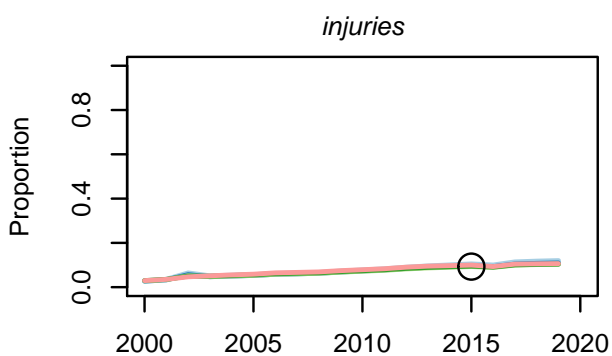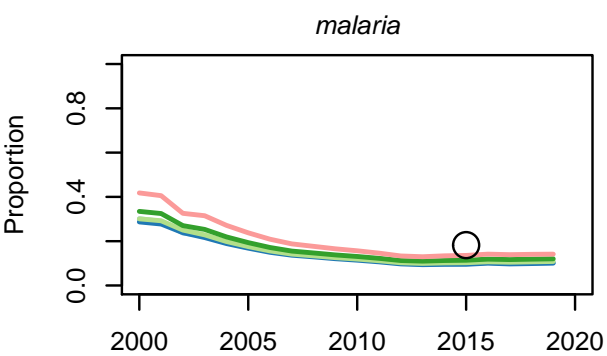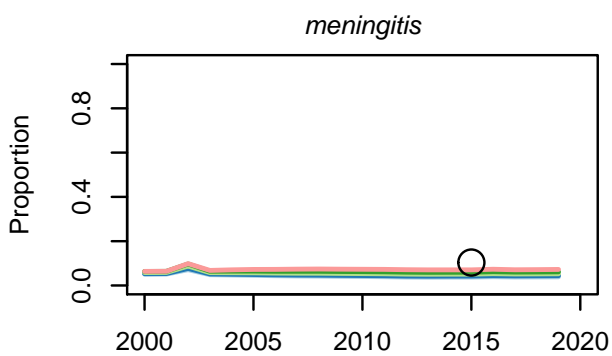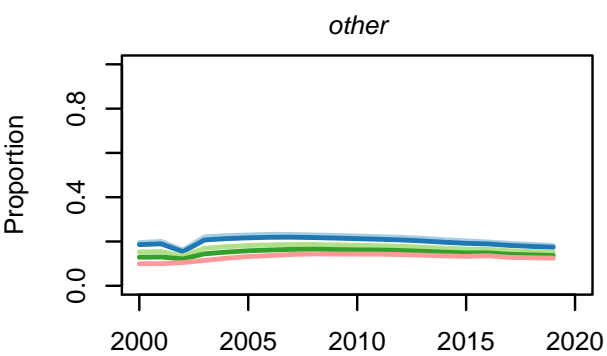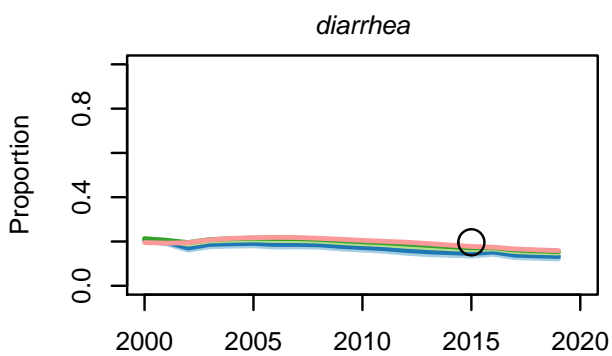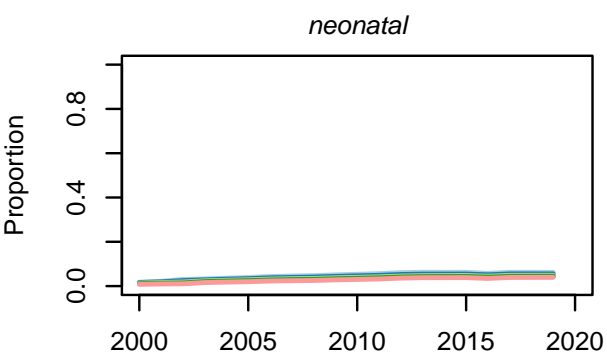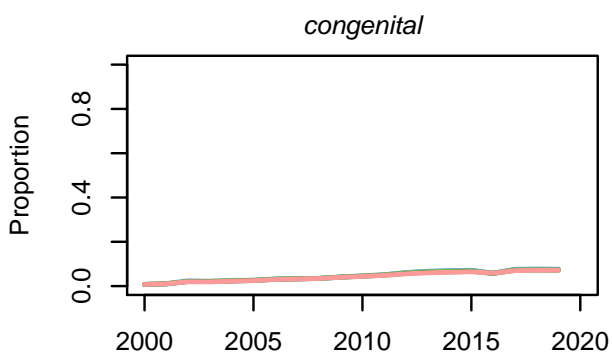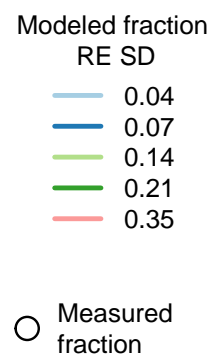

# Indonesia

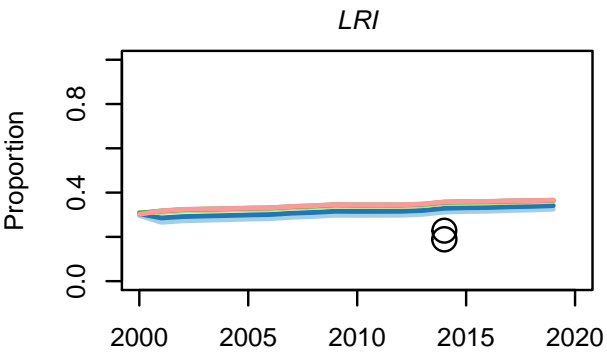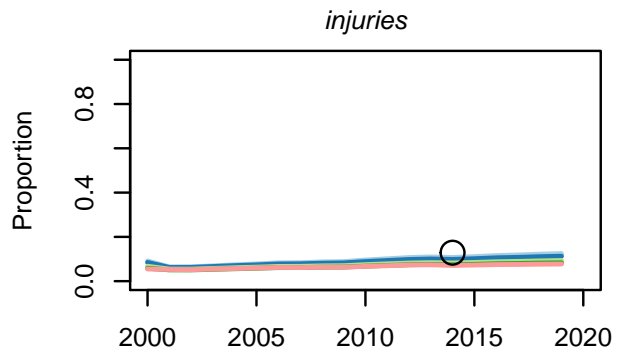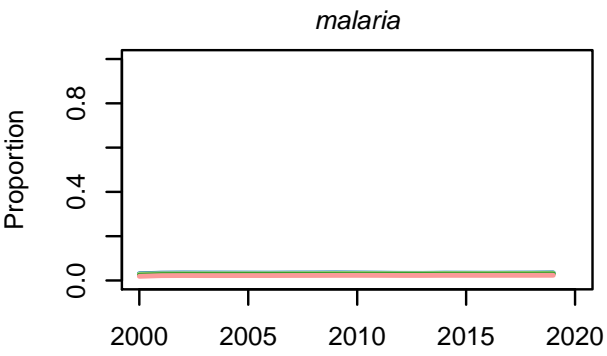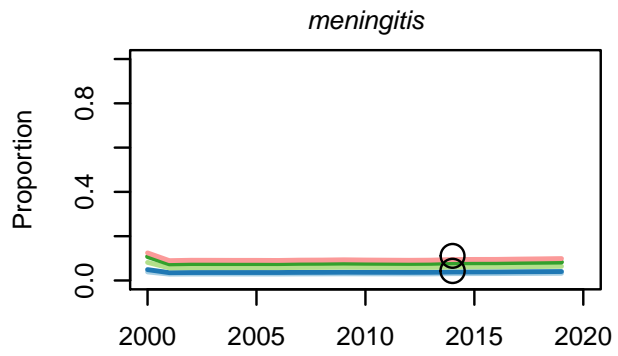

Modeled fraction  
RE SD

- 0.04
- 0.07
- 0.14
- 0.21
- 0.35

○ Measured fraction

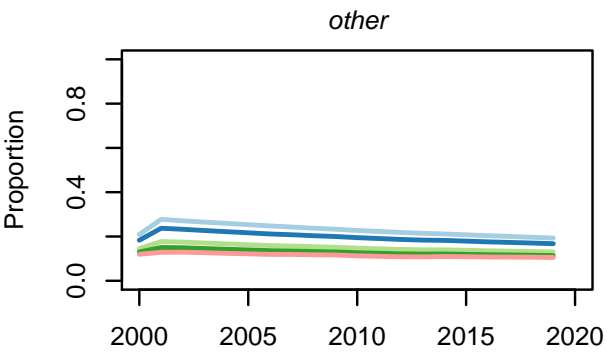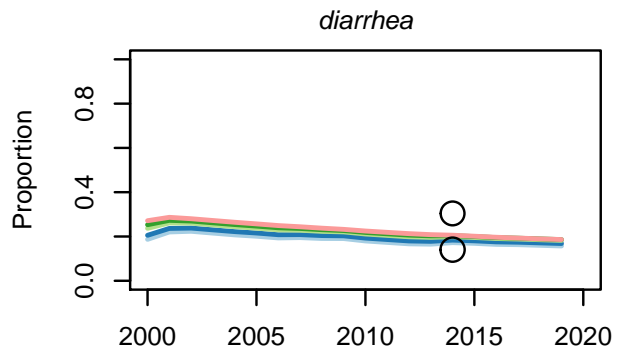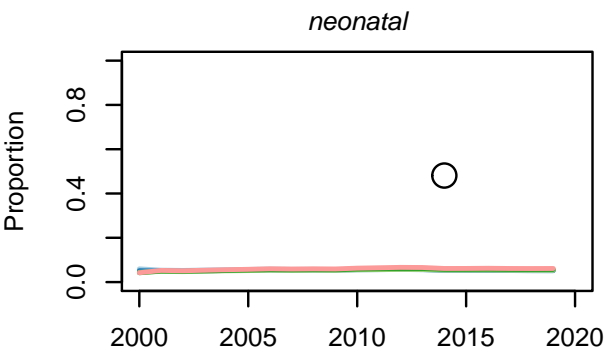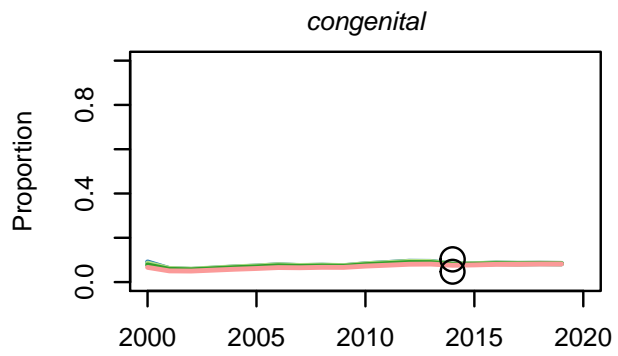

# Niger

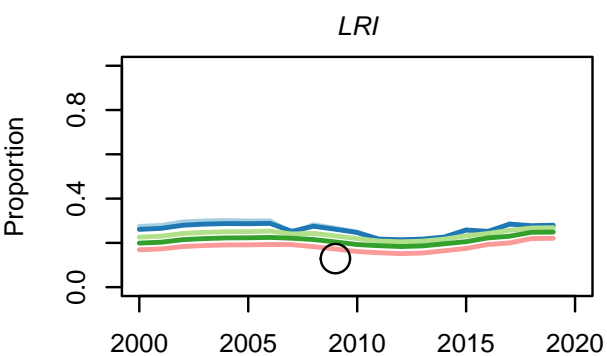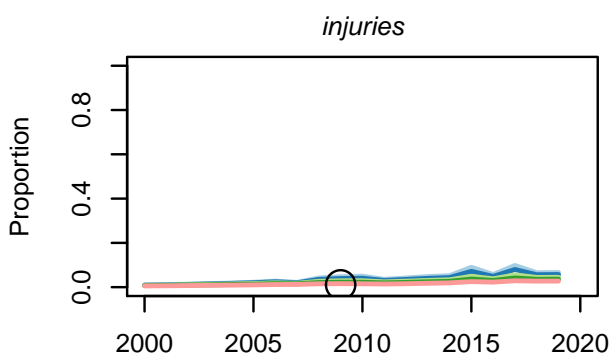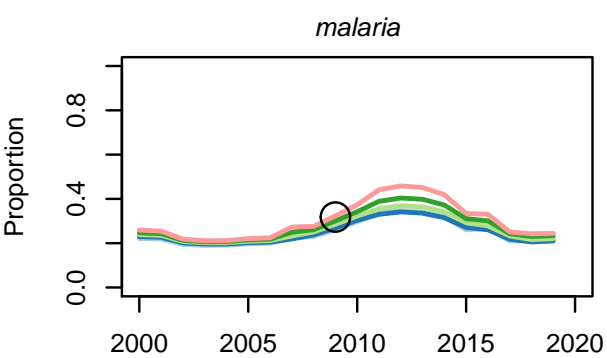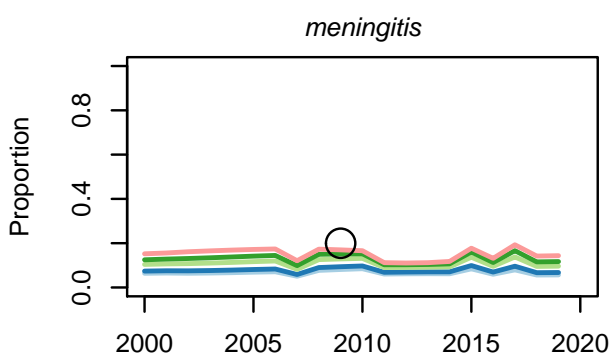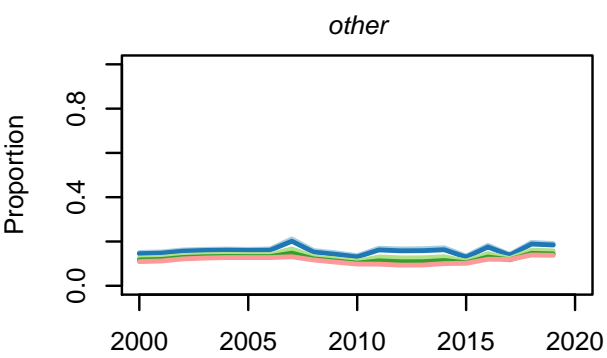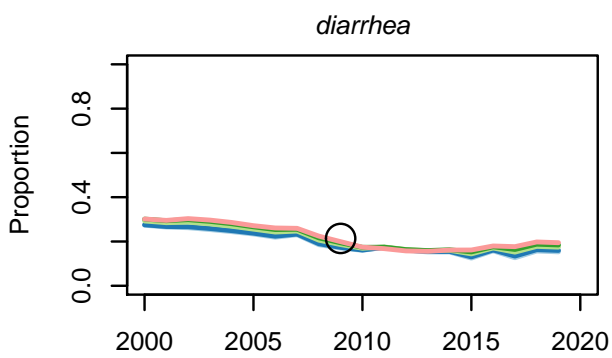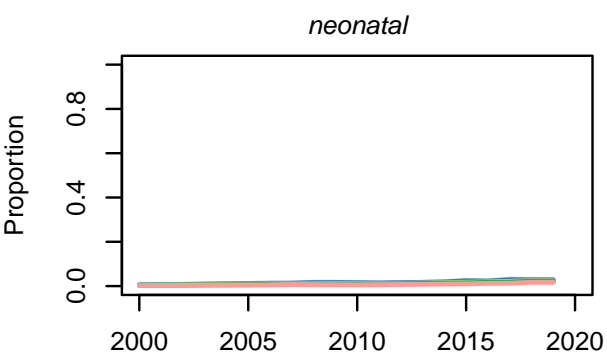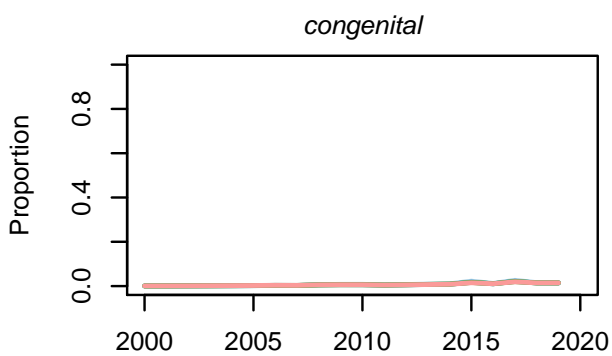

Modeled fraction  
RE SD

- 0.04
- 0.07
- 0.14
- 0.21
- 0.35

○ Measured fraction

## Mozambique

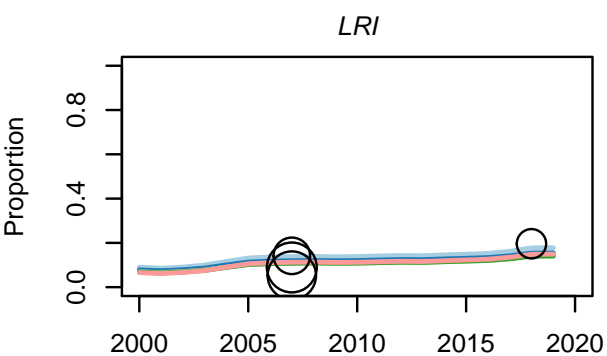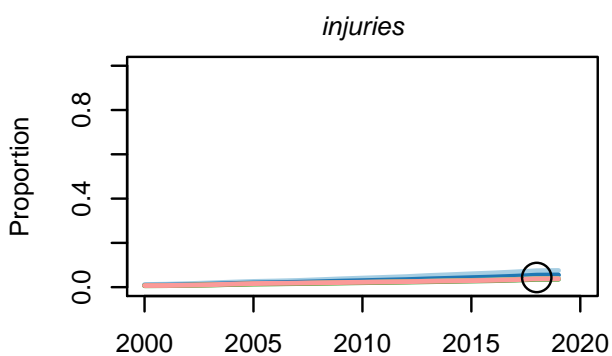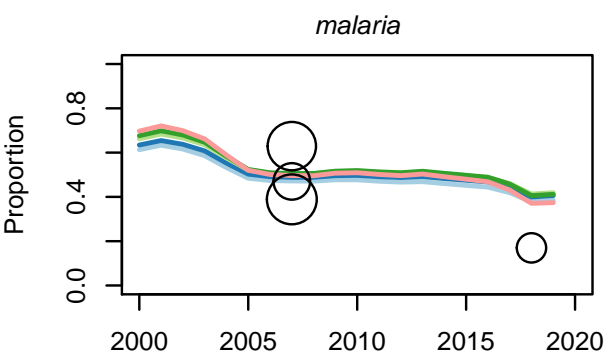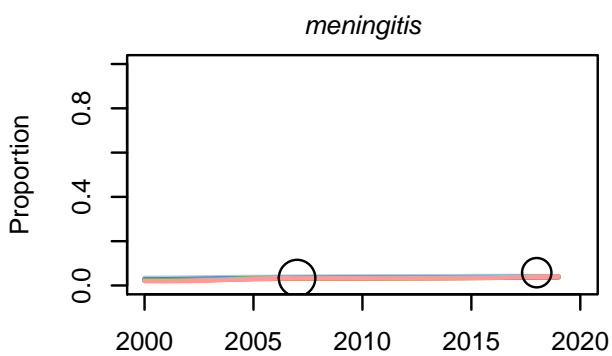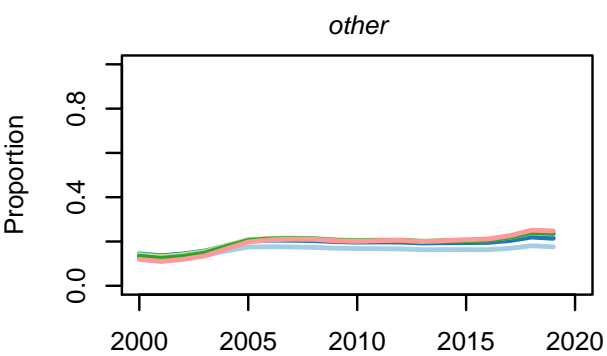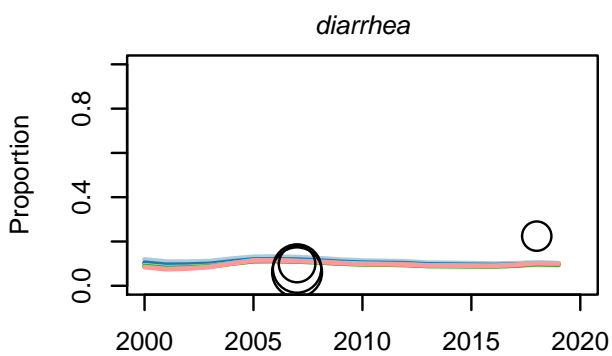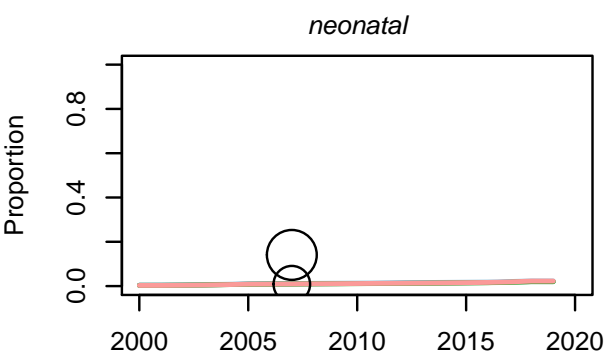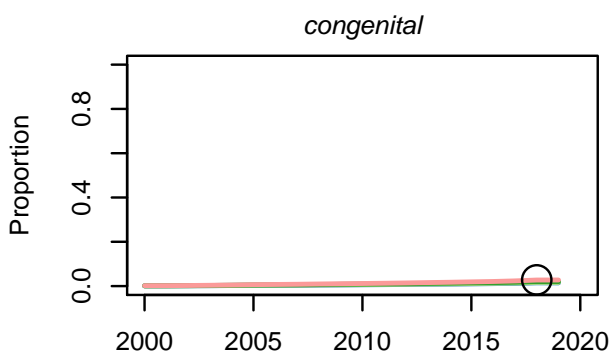

Modeled fraction  
RE SD

- 0.04
- 0.07
- 0.14
- 0.21
- 0.35

○ Measured fraction

# Uganda

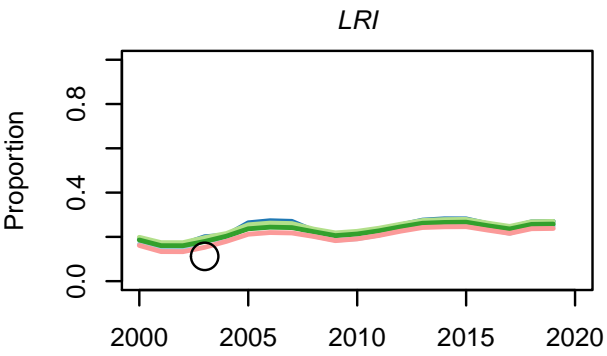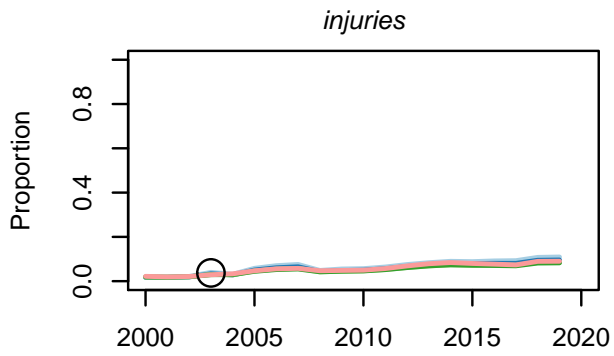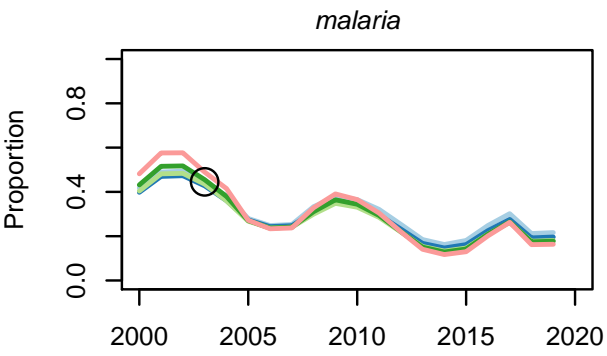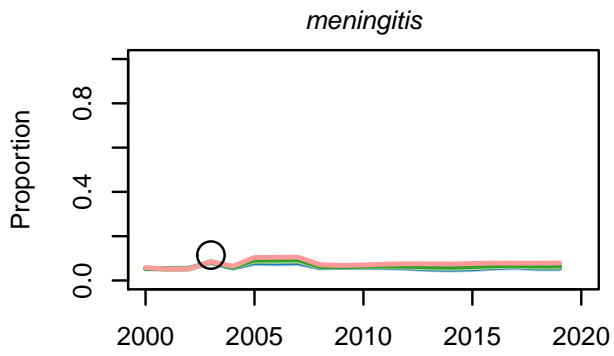

Modeled fraction  
RE SD

- 0.04
- 0.07
- 0.14
- 0.21
- 0.35

○ Measured fraction

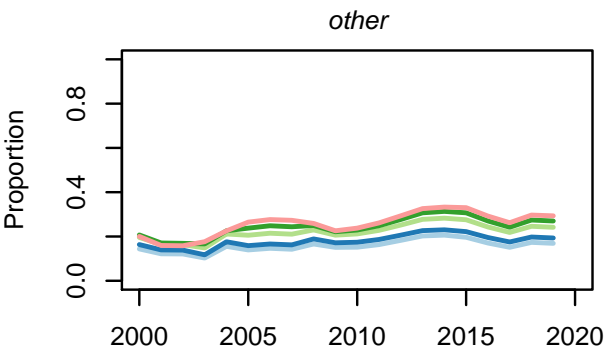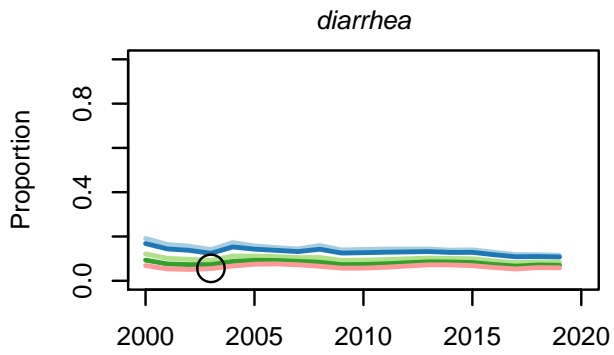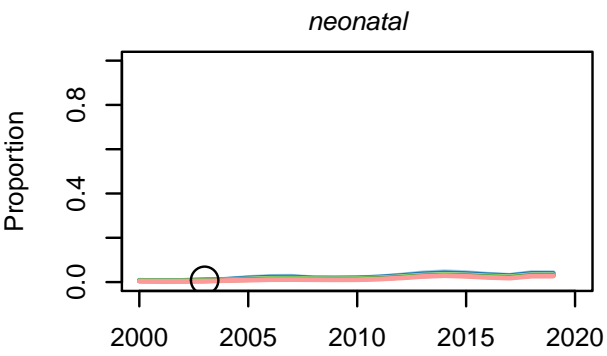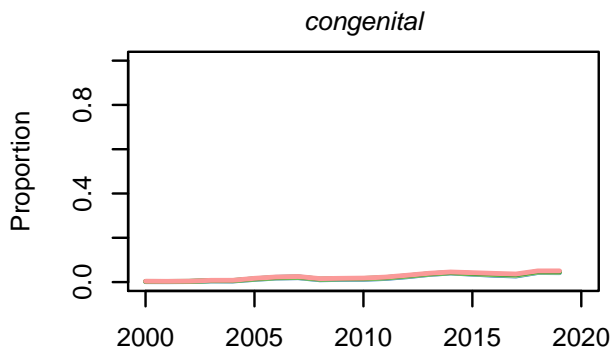

# Bangladesh

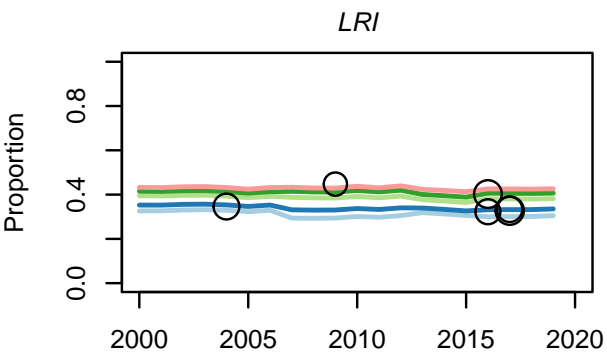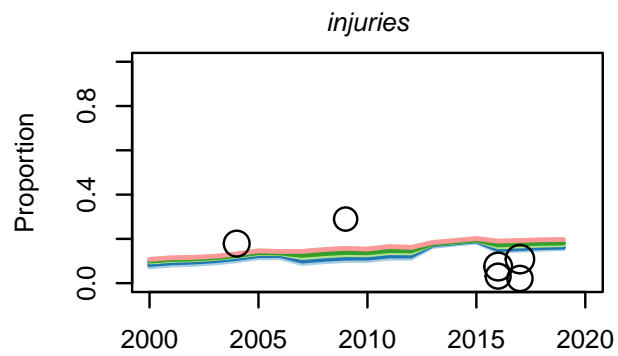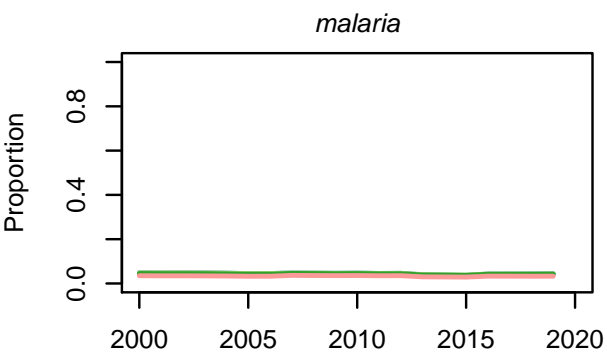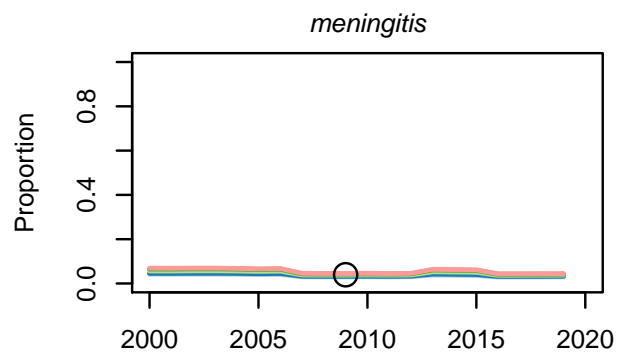

Modeled fraction  
RE SD

- 0.04
- 0.07
- 0.14
- 0.21
- 0.35

○ Measured fraction

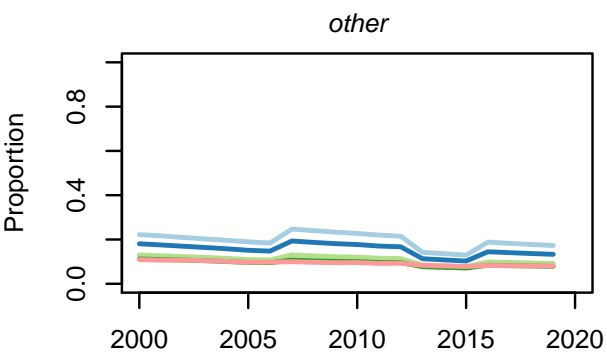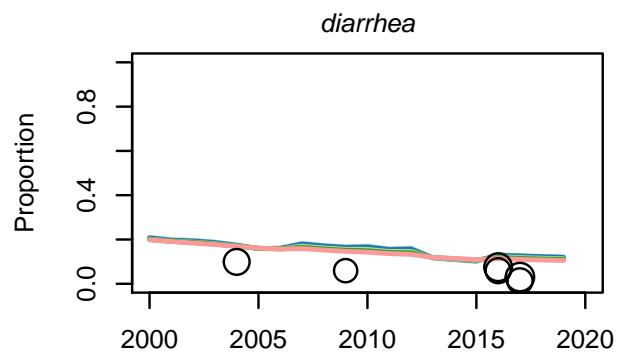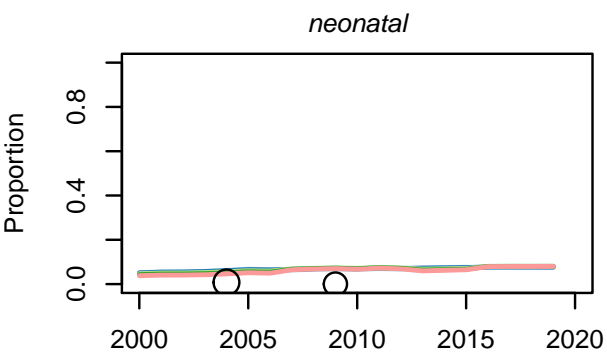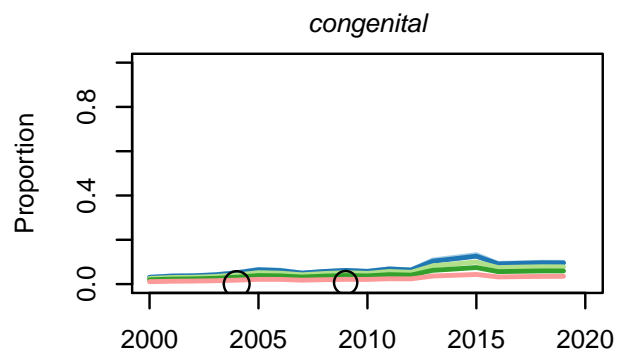



# Afghanistan

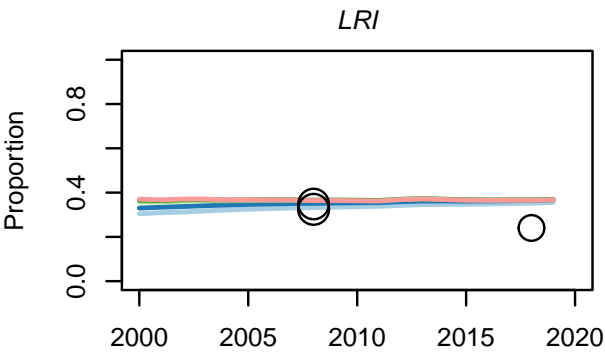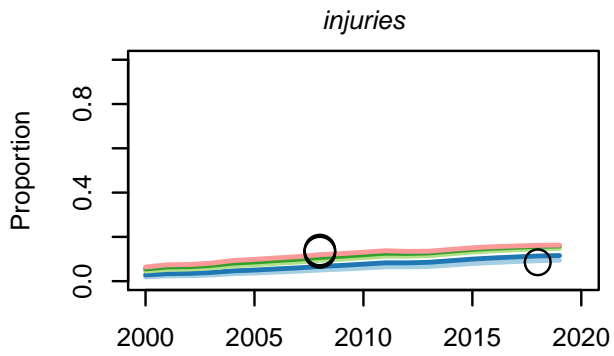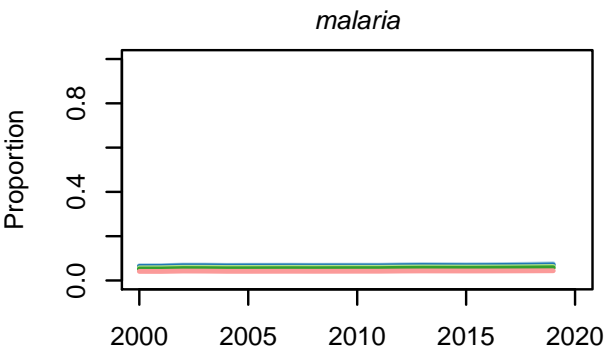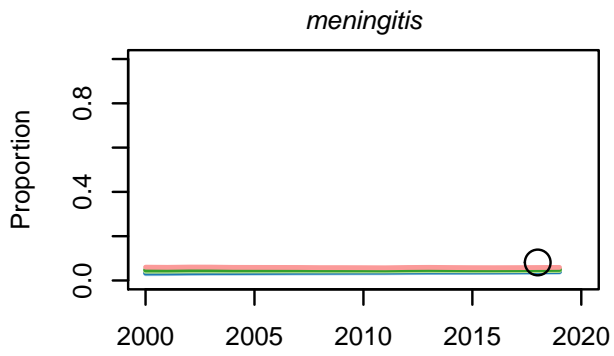

Modeled fraction  
RE SD

- 0.04
- 0.07
- 0.14
- 0.21
- 0.35

○ Measured fraction

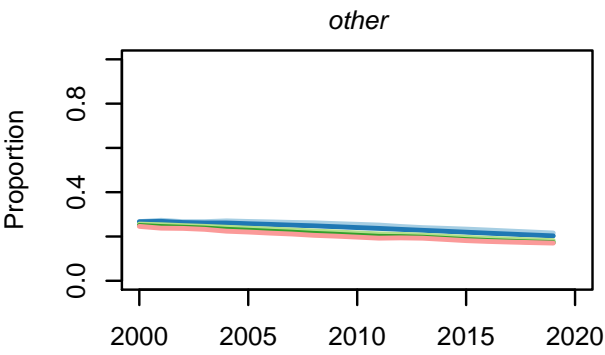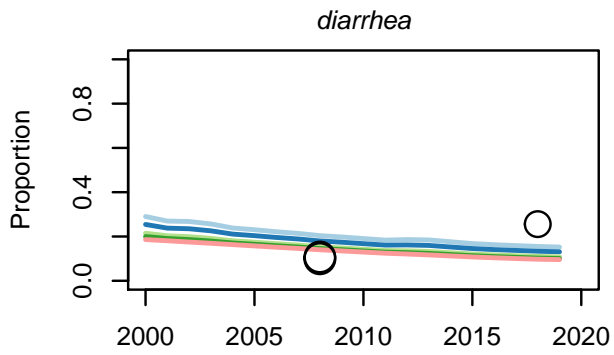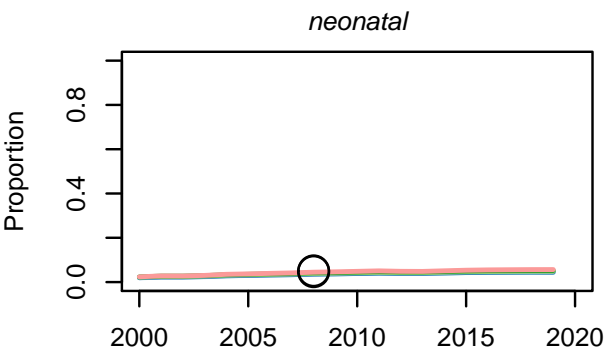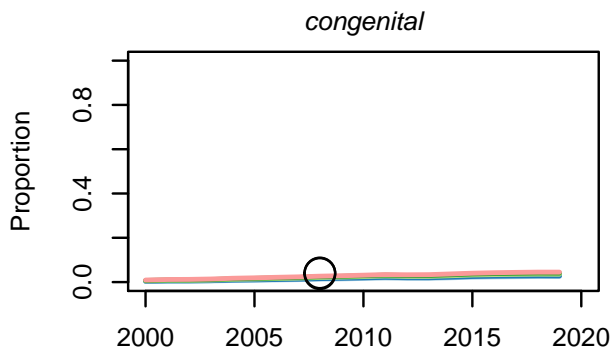

# Ghana

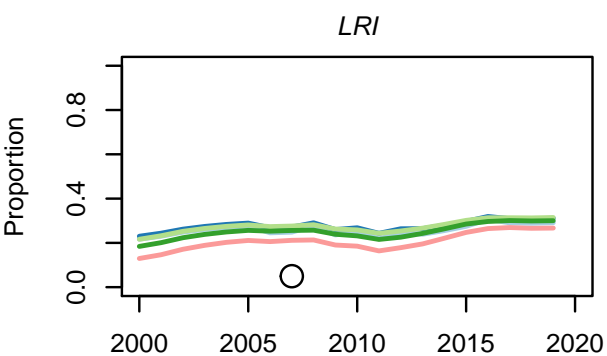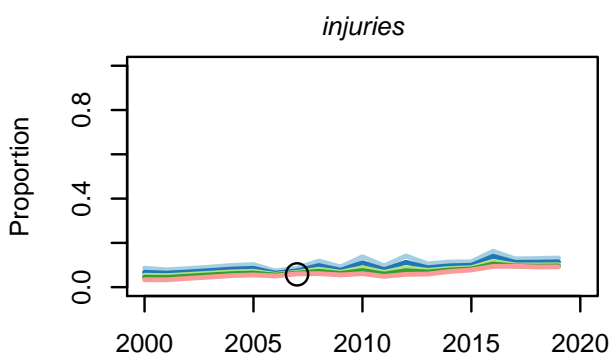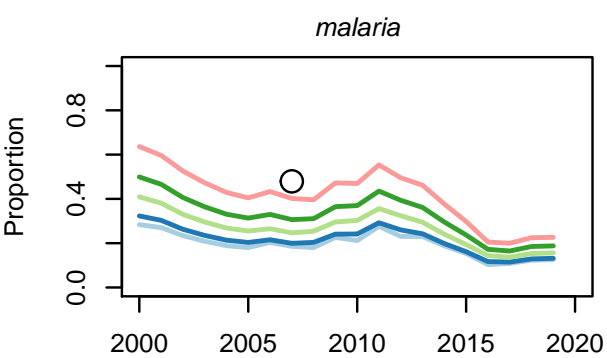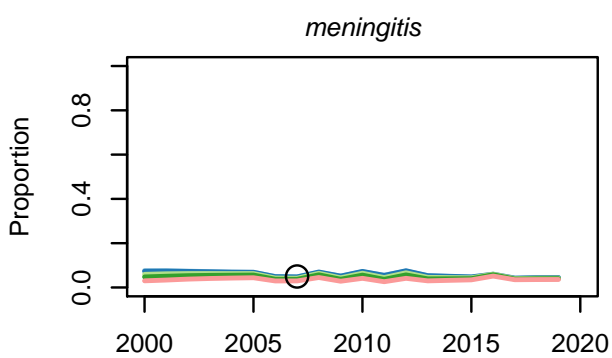

Modeled fraction  
RE SD

- 0.04
- 0.07
- 0.14
- 0.21
- 0.35

○ Measured fraction

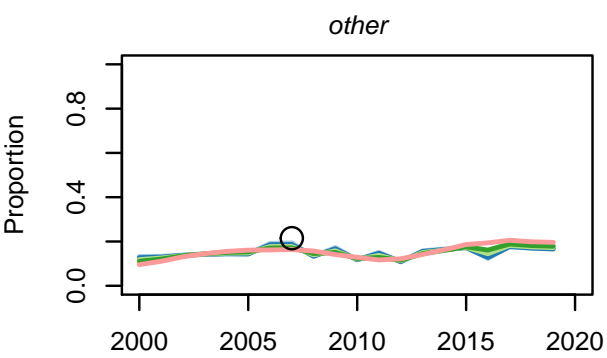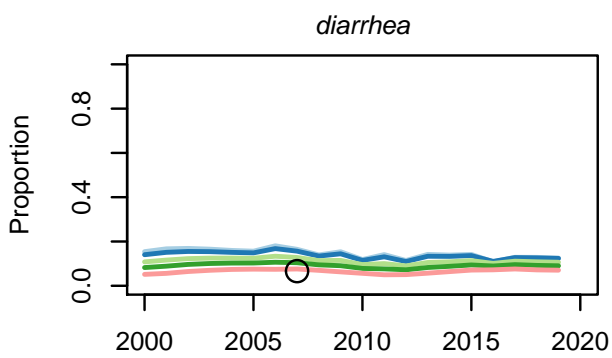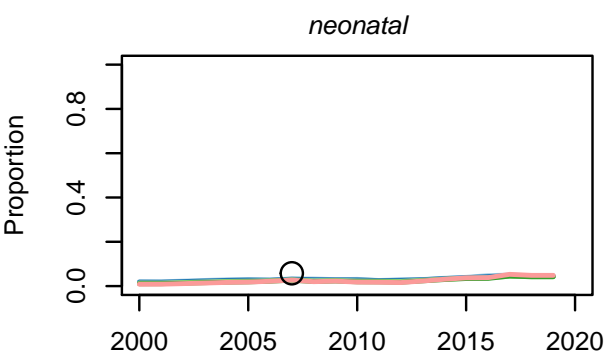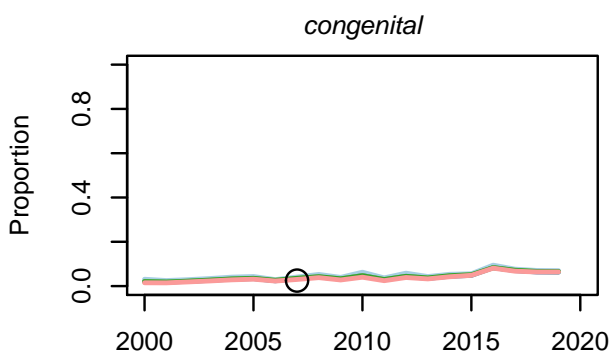

# Nepal

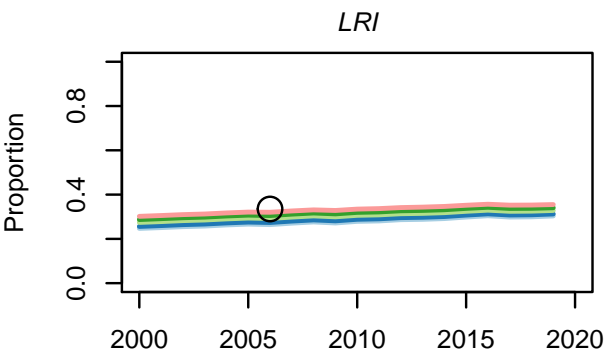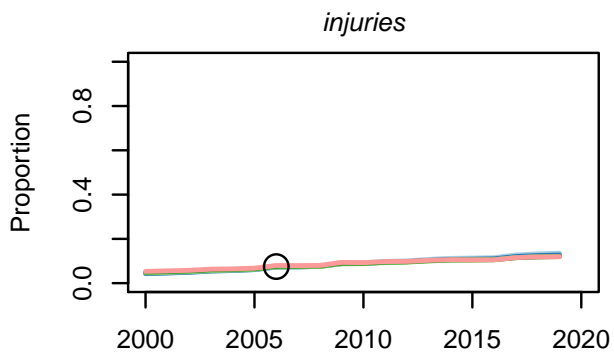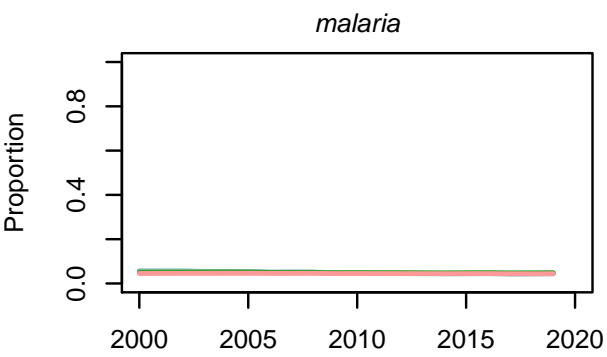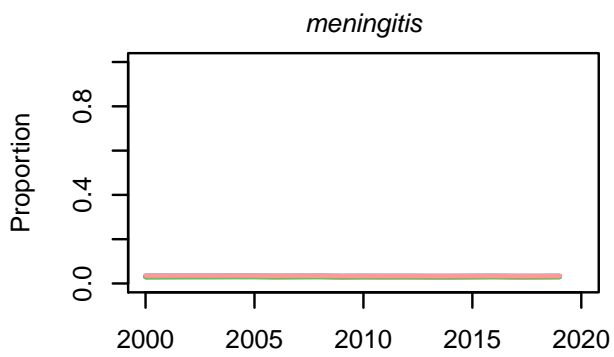

Modeled fraction  
RE SD

- 0.04
- 0.07
- 0.14
- 0.21
- 0.35

○ Measured fraction

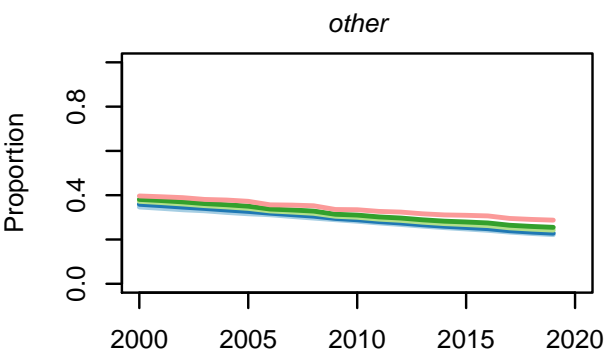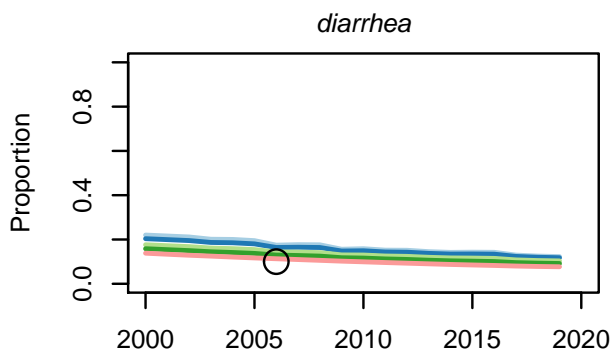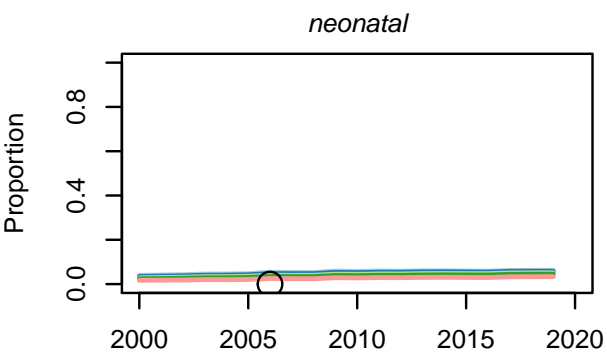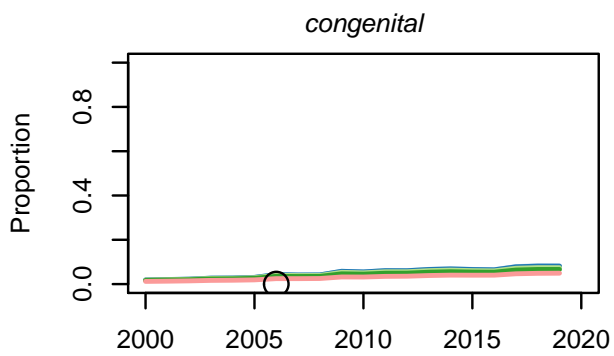

# Dominican Republic

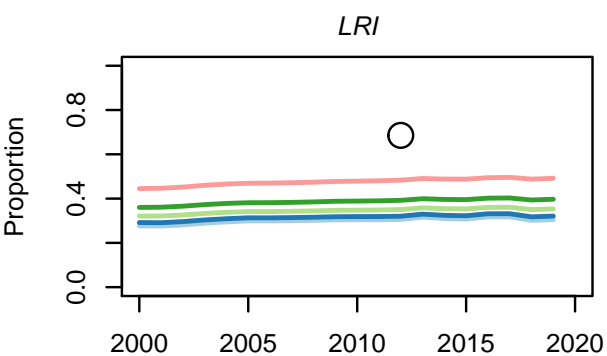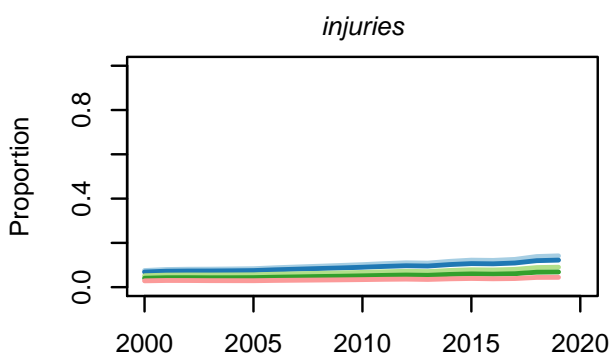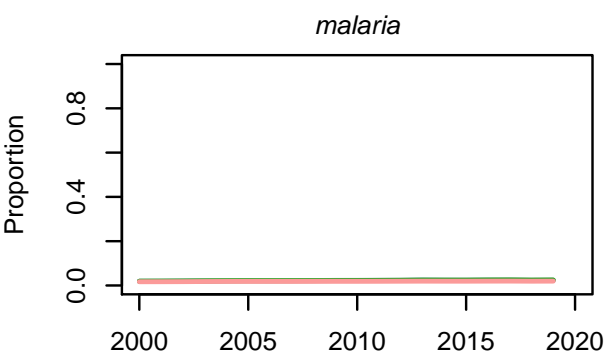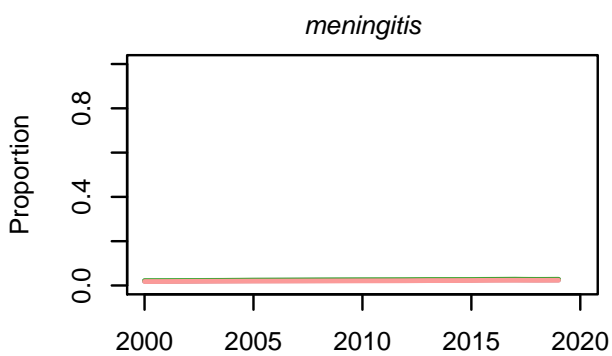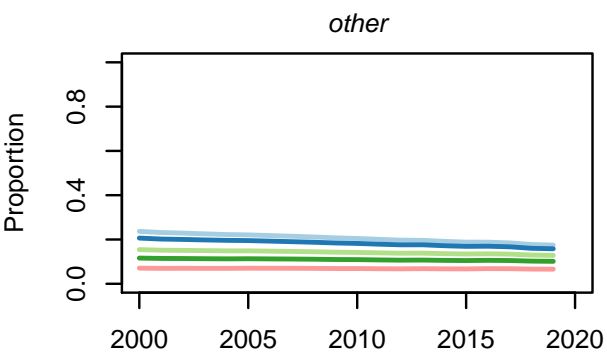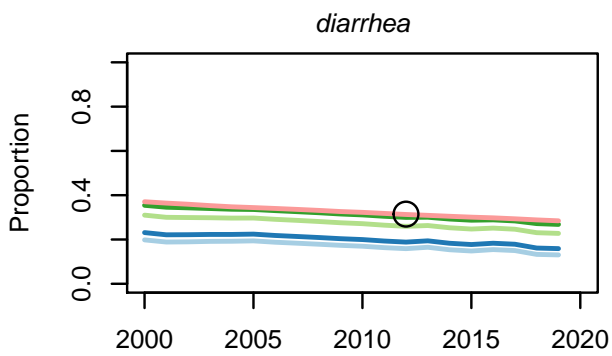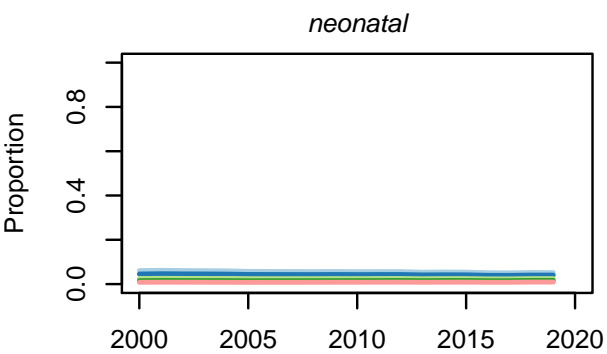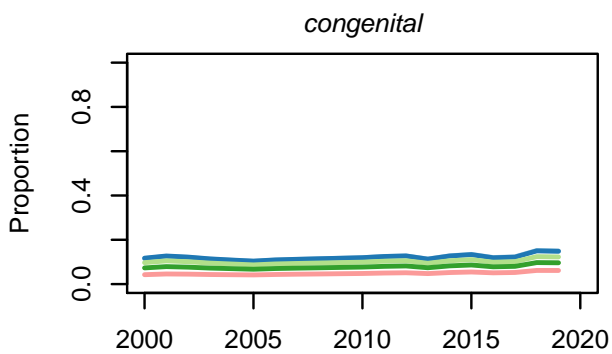

Modeled fraction  
RE SD

- 0.04
- 0.07
- 0.14
- 0.21
- 0.35

○ Measured fraction



## Appendix 5: Convergence of fixed effects (trace plots)

# Early low mortality model for neonates, cause: intrapartum

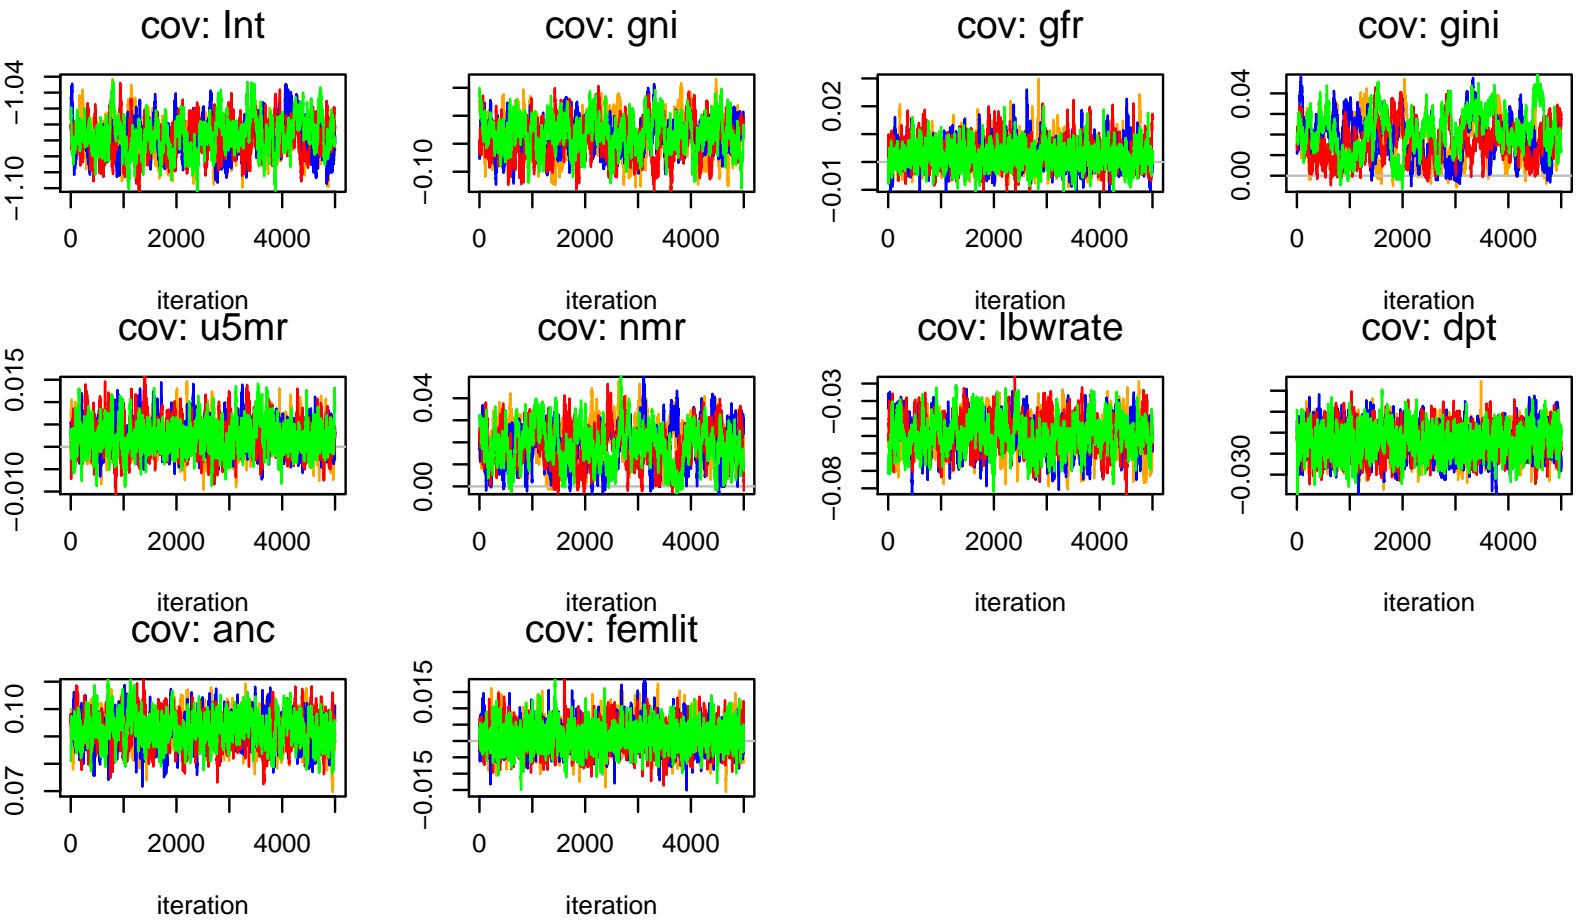

# Early low mortality model for neonates, cause: congenital

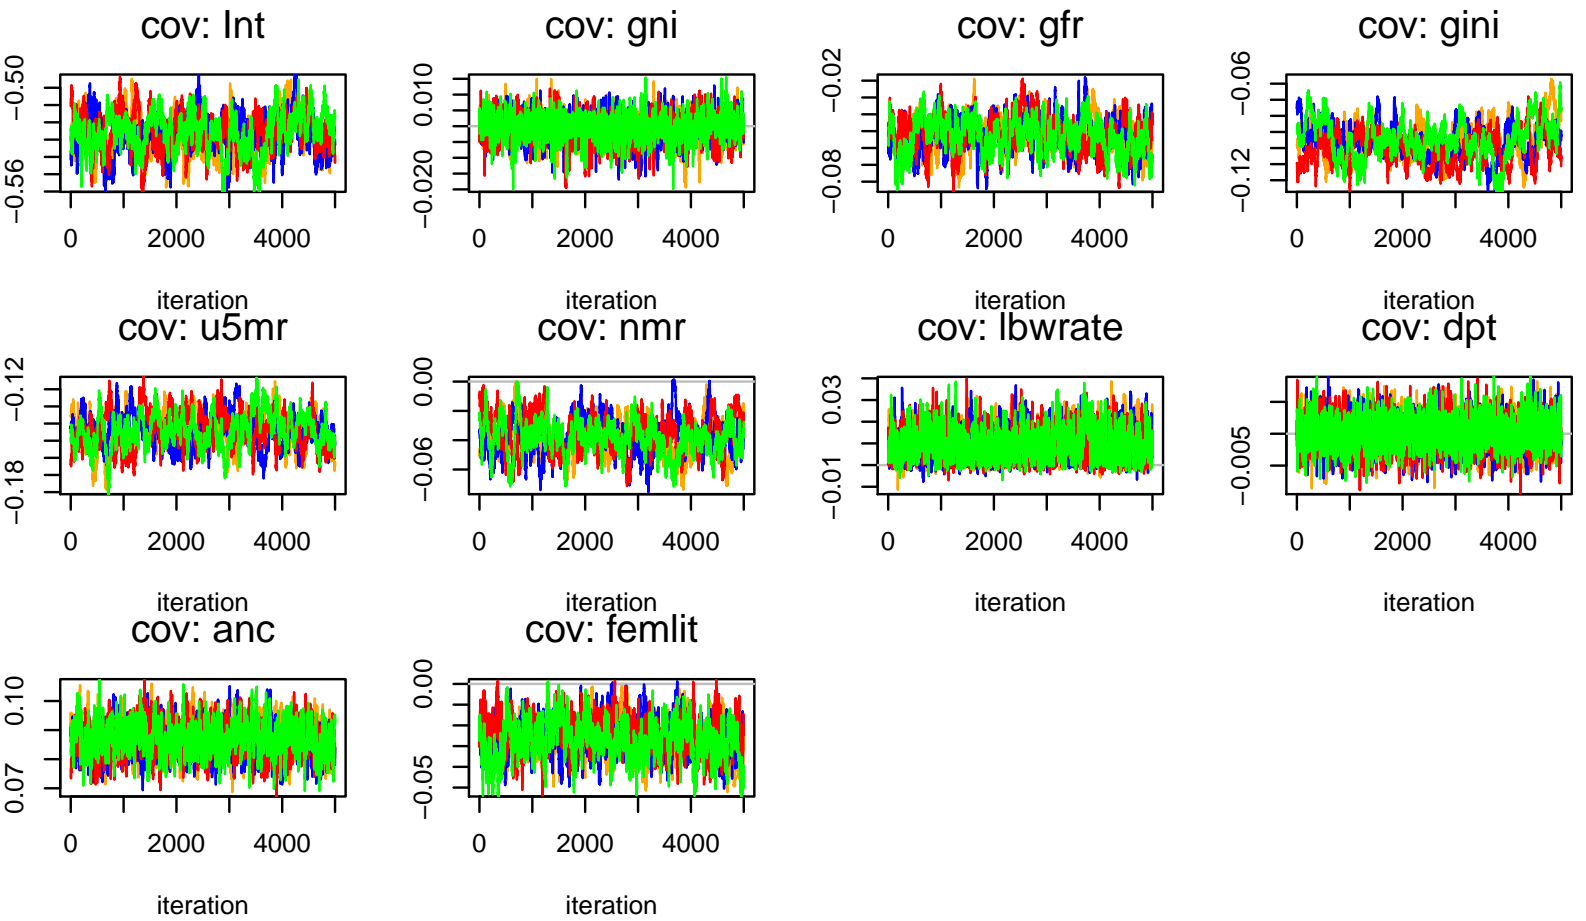



# Early low mortality model for neonates, cause: sepsis

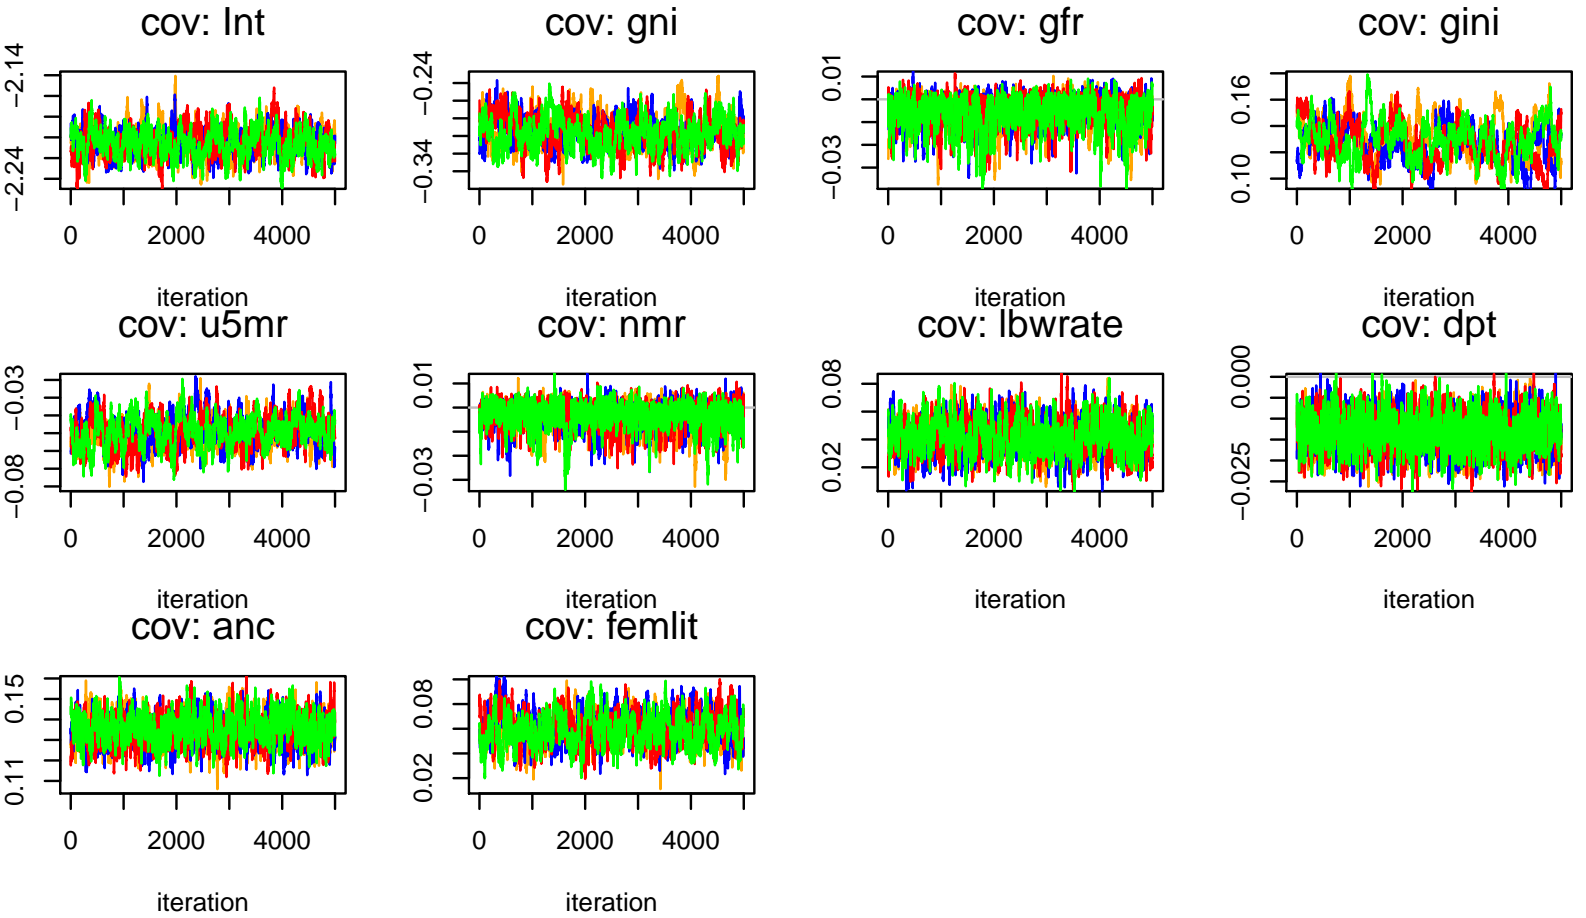

# Early low mortality model for neonates, cause: pneumonia

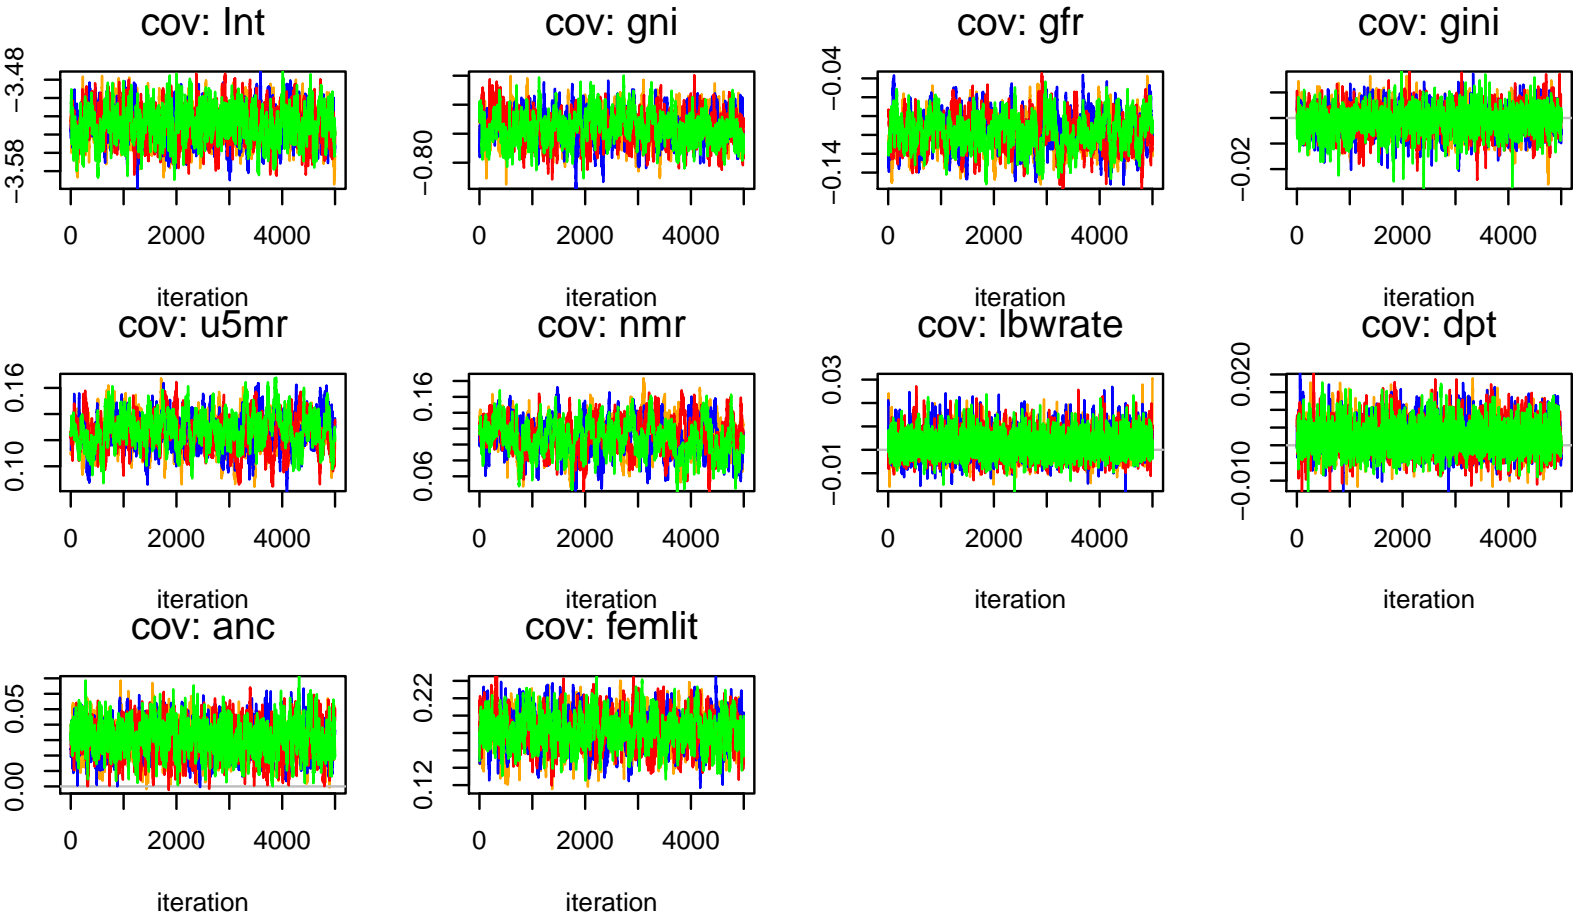

# Early low mortality model for neonates, cause: injuries

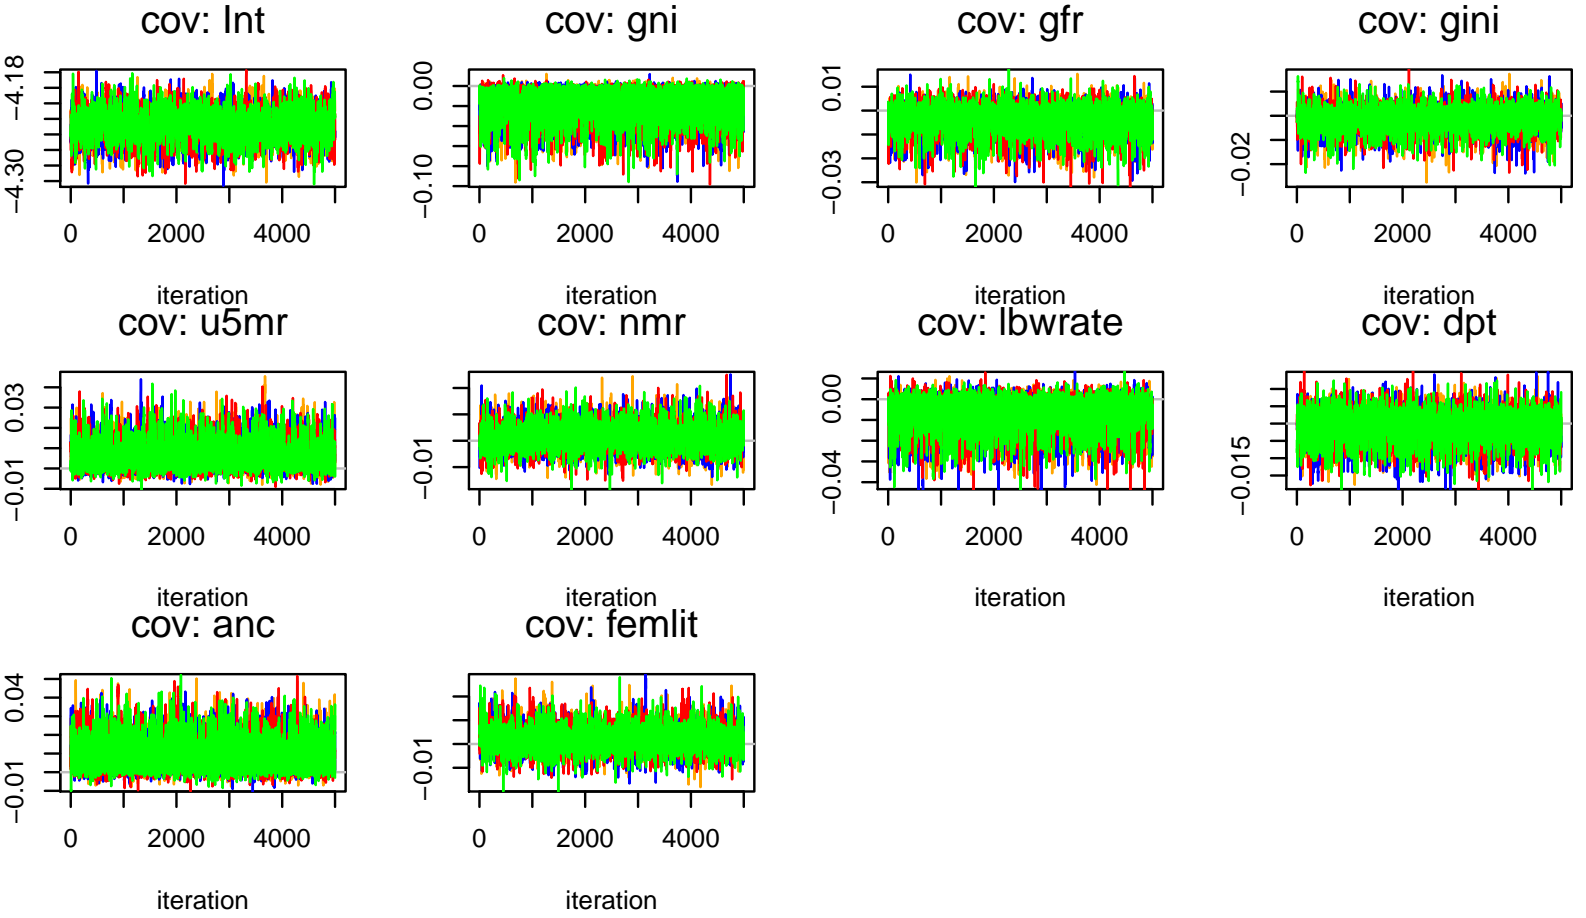

# Early low mortality model for neonates, cause: other

cov: lnt

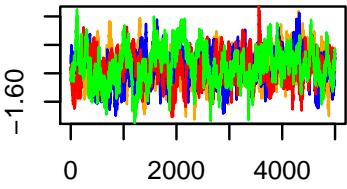

cov: gni

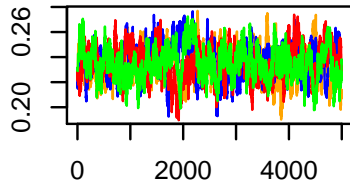

cov: gfr

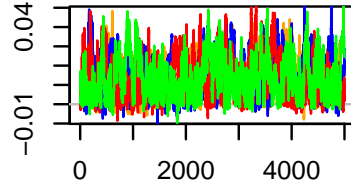

cov: gini

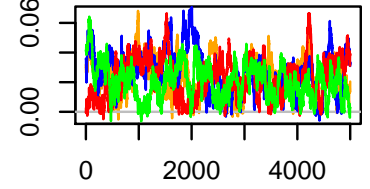

iteration  
cov: u5mr

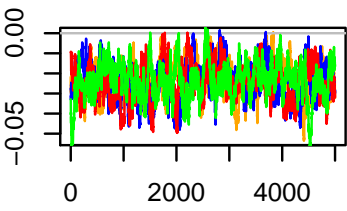

iteration  
cov: nmr

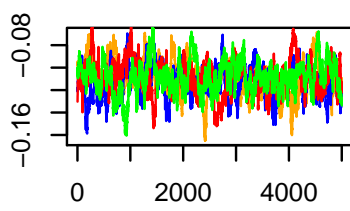

iteration  
cov: lbwrate

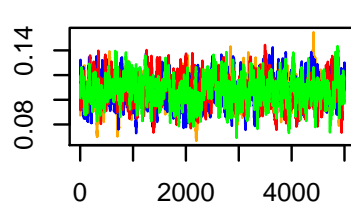

iteration  
cov: dpt

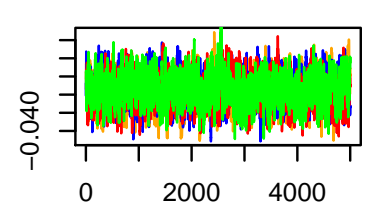

iteration  
cov: anc

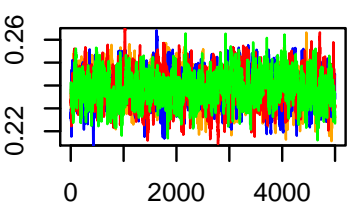

iteration  
cov: femlit

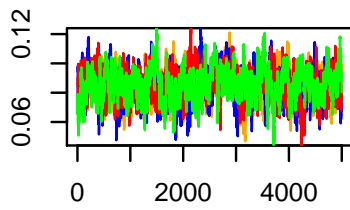

iteration

iteration

# Late low mortality model for neonates, cause: intrapartum

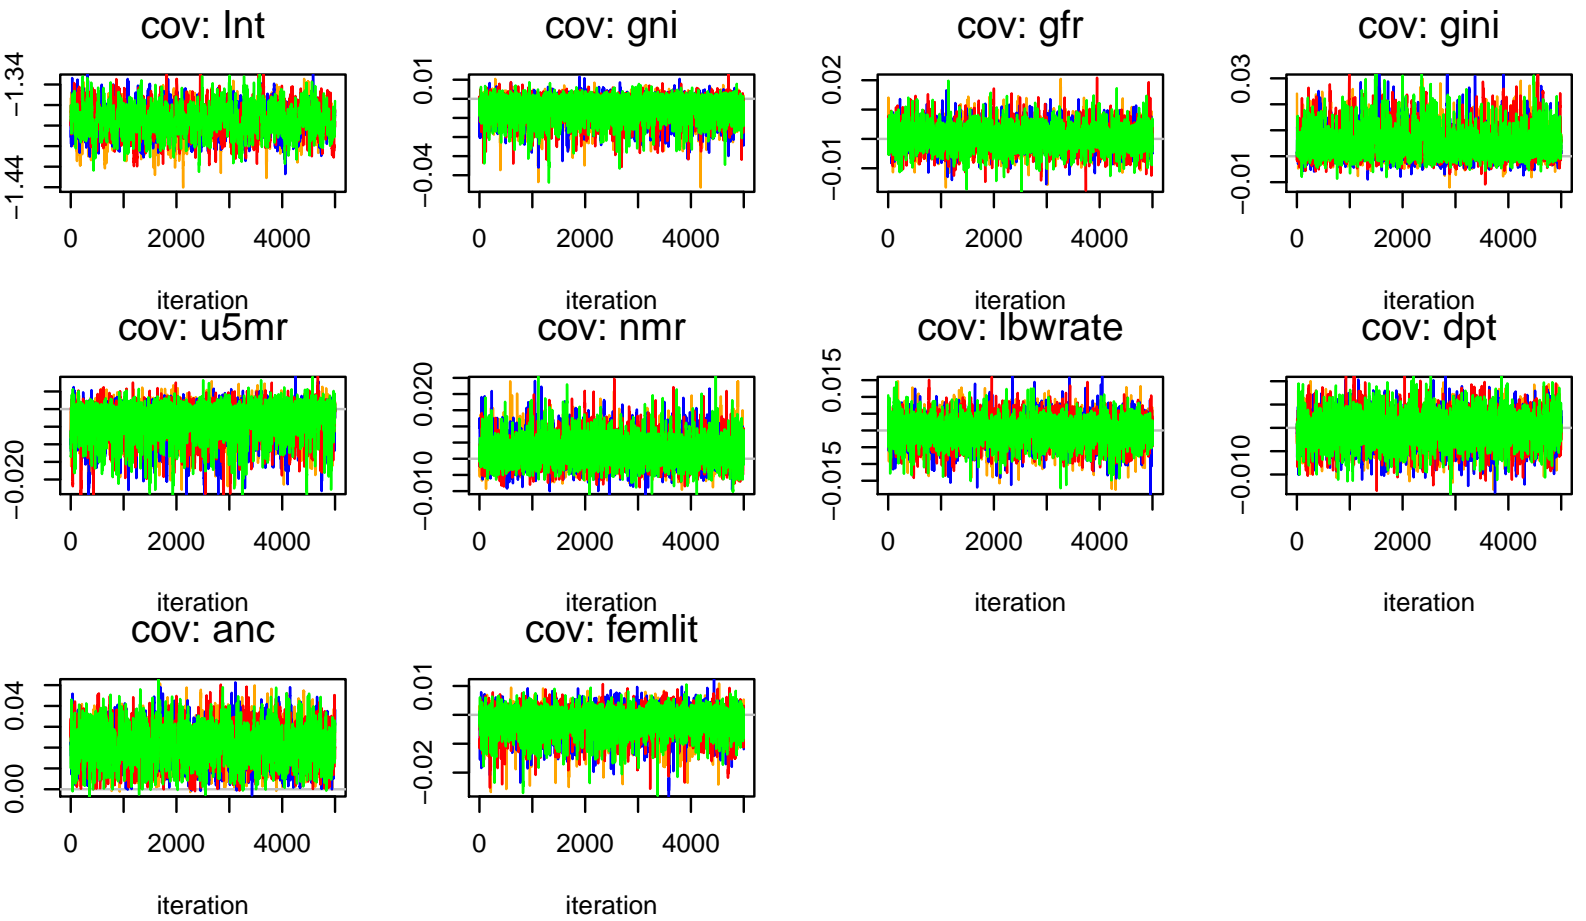

# Late low mortality model for neonates, cause: congenital

cov: lnt

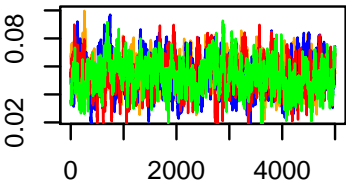

cov: gni

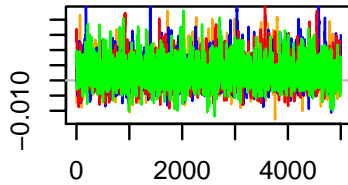

cov: gfr

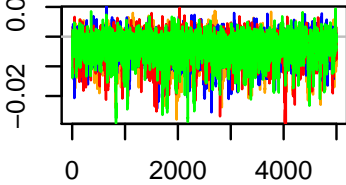

cov: gini

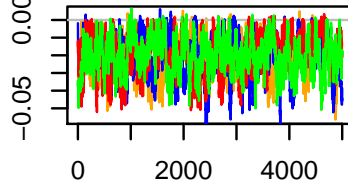

iteration  
cov: u5mr

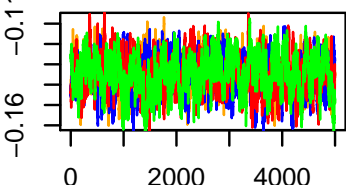

iteration  
cov: nmr

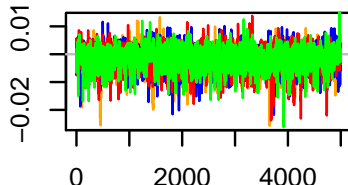

iteration  
cov: lbwrate

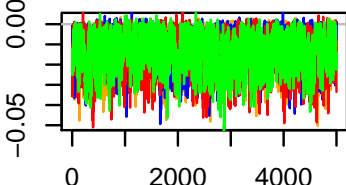

iteration  
cov: dpt

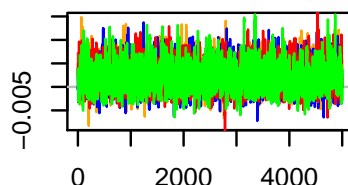

iteration  
cov: anc

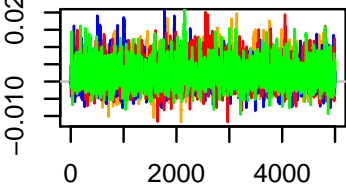

iteration  
cov: femlit

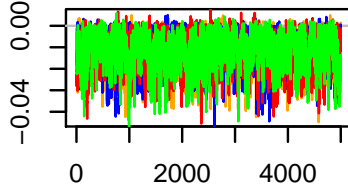

iteration

iteration

# Late low mortality model for neonates, cause: sepsis

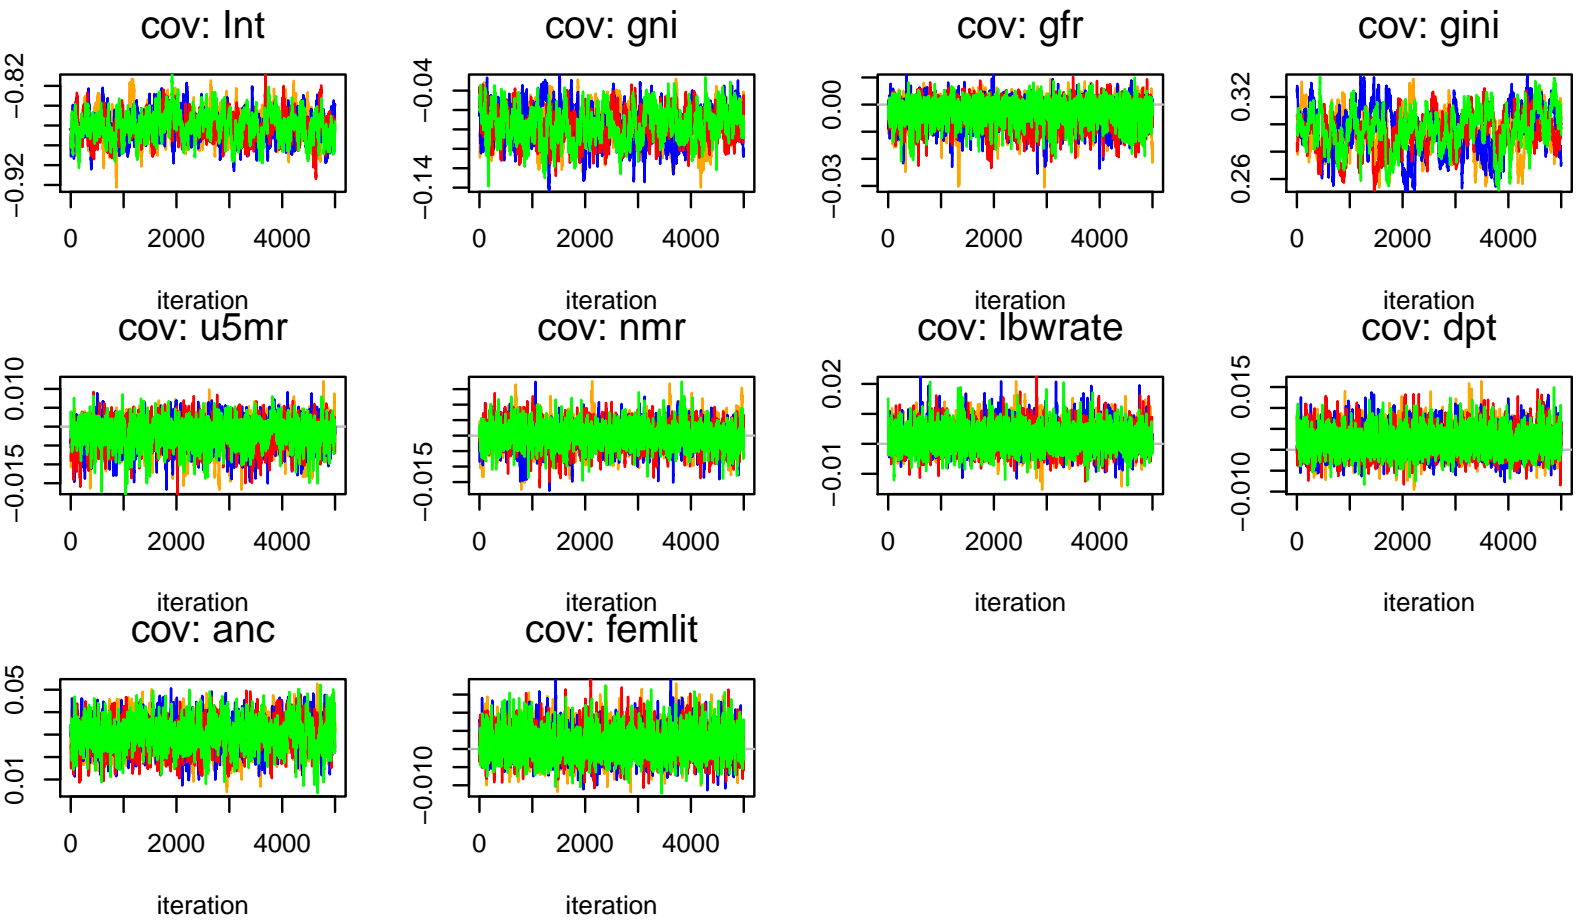

# Late low mortality model for neonates, cause: pneumonia

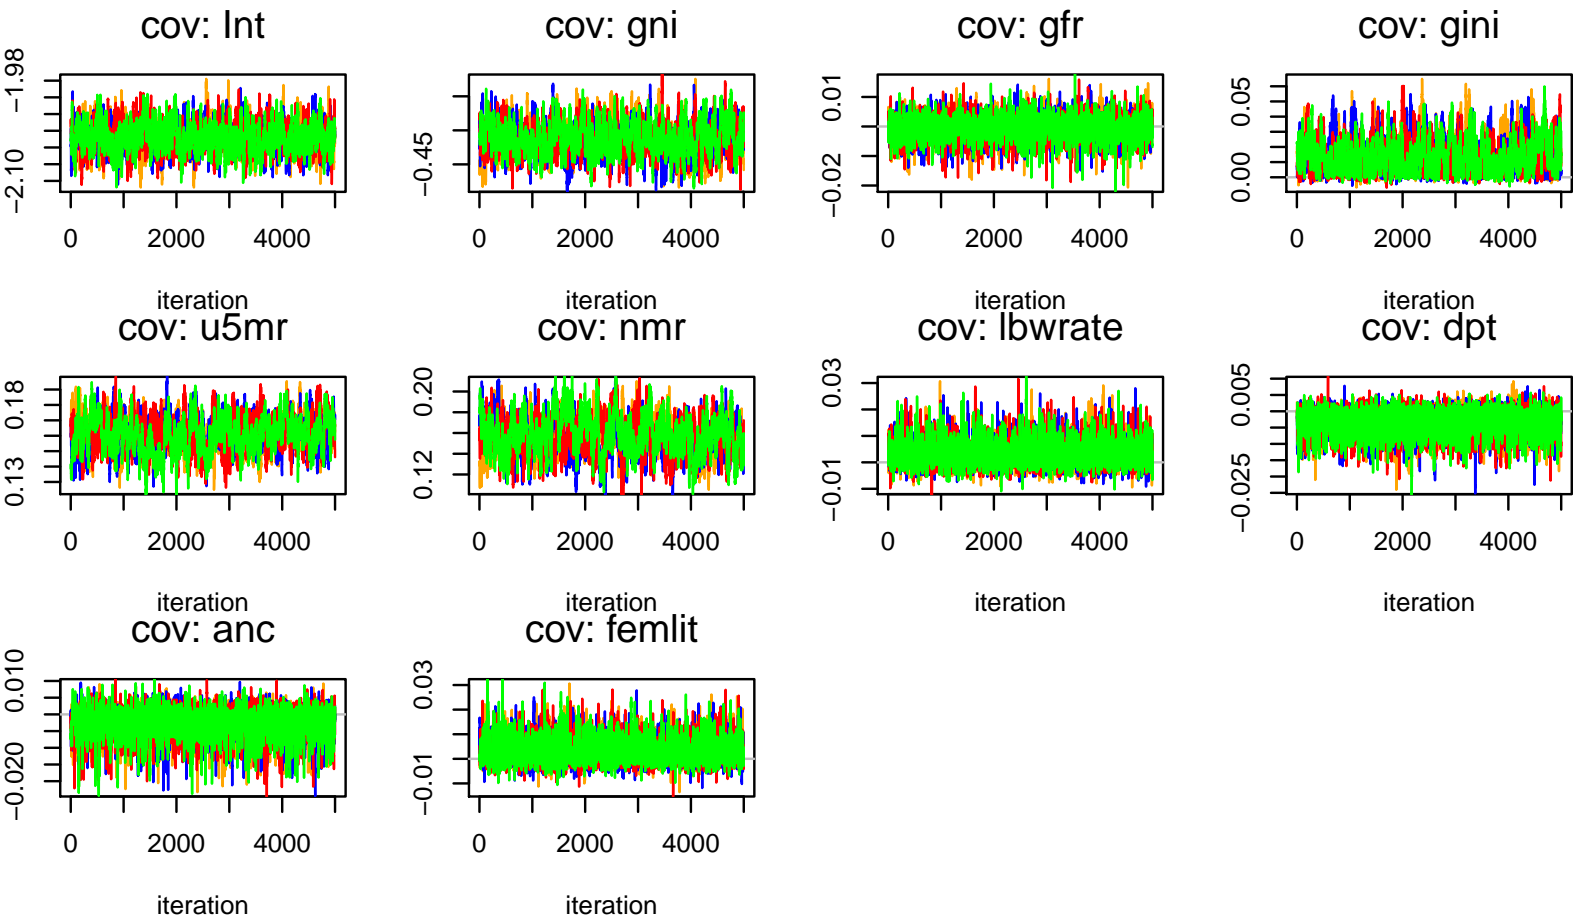



# Late low mortality model for neonates, cause: injuries

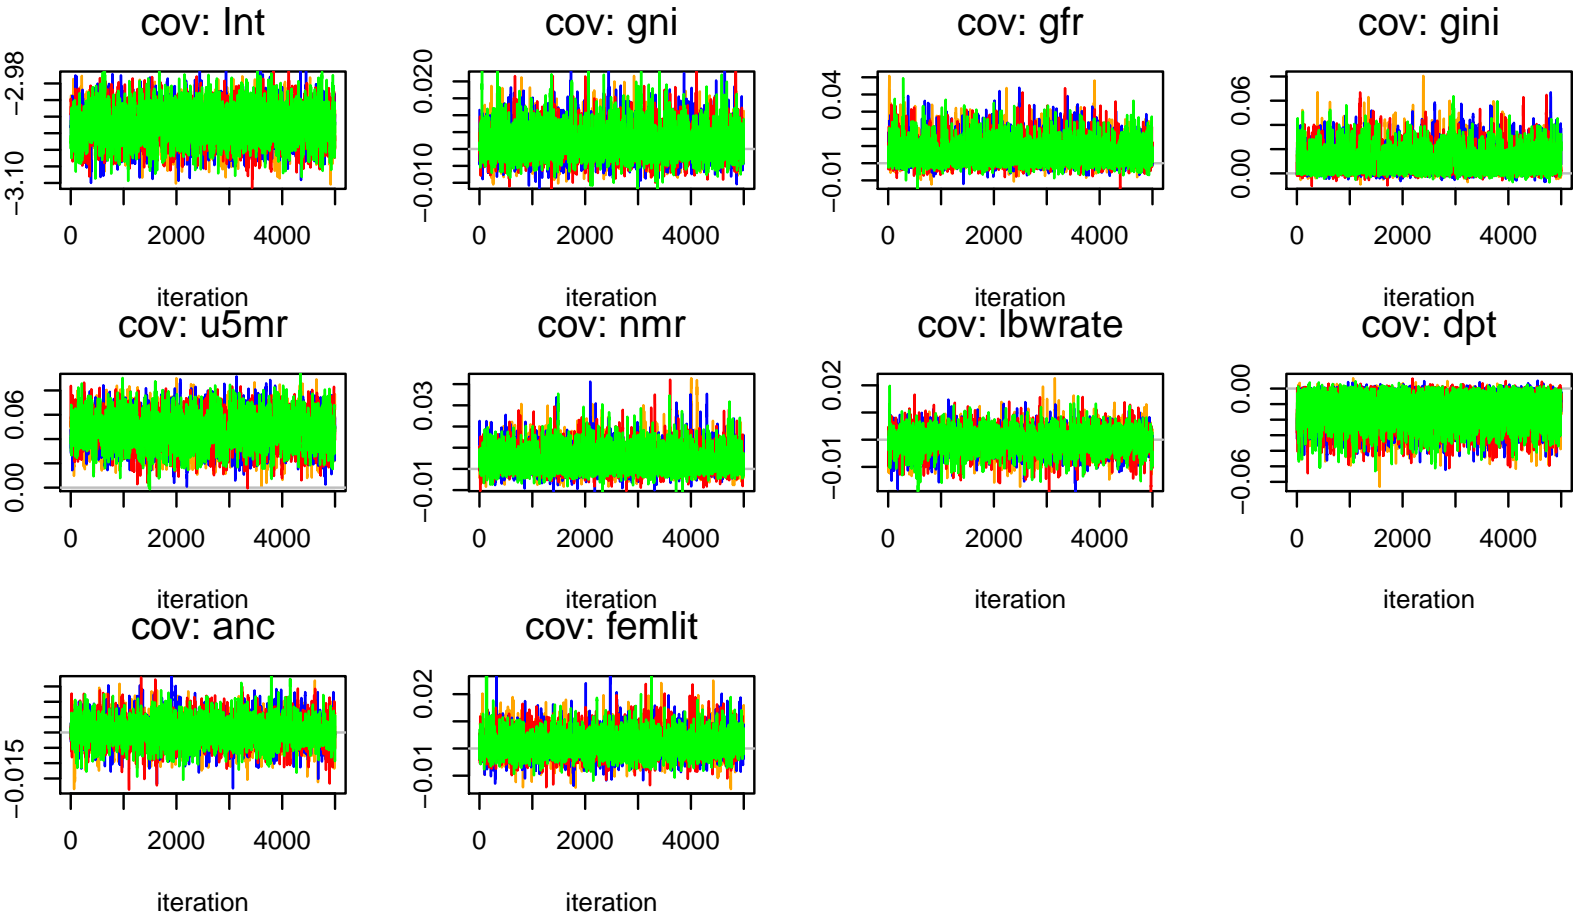

# Late low mortality model for neonates, cause: other

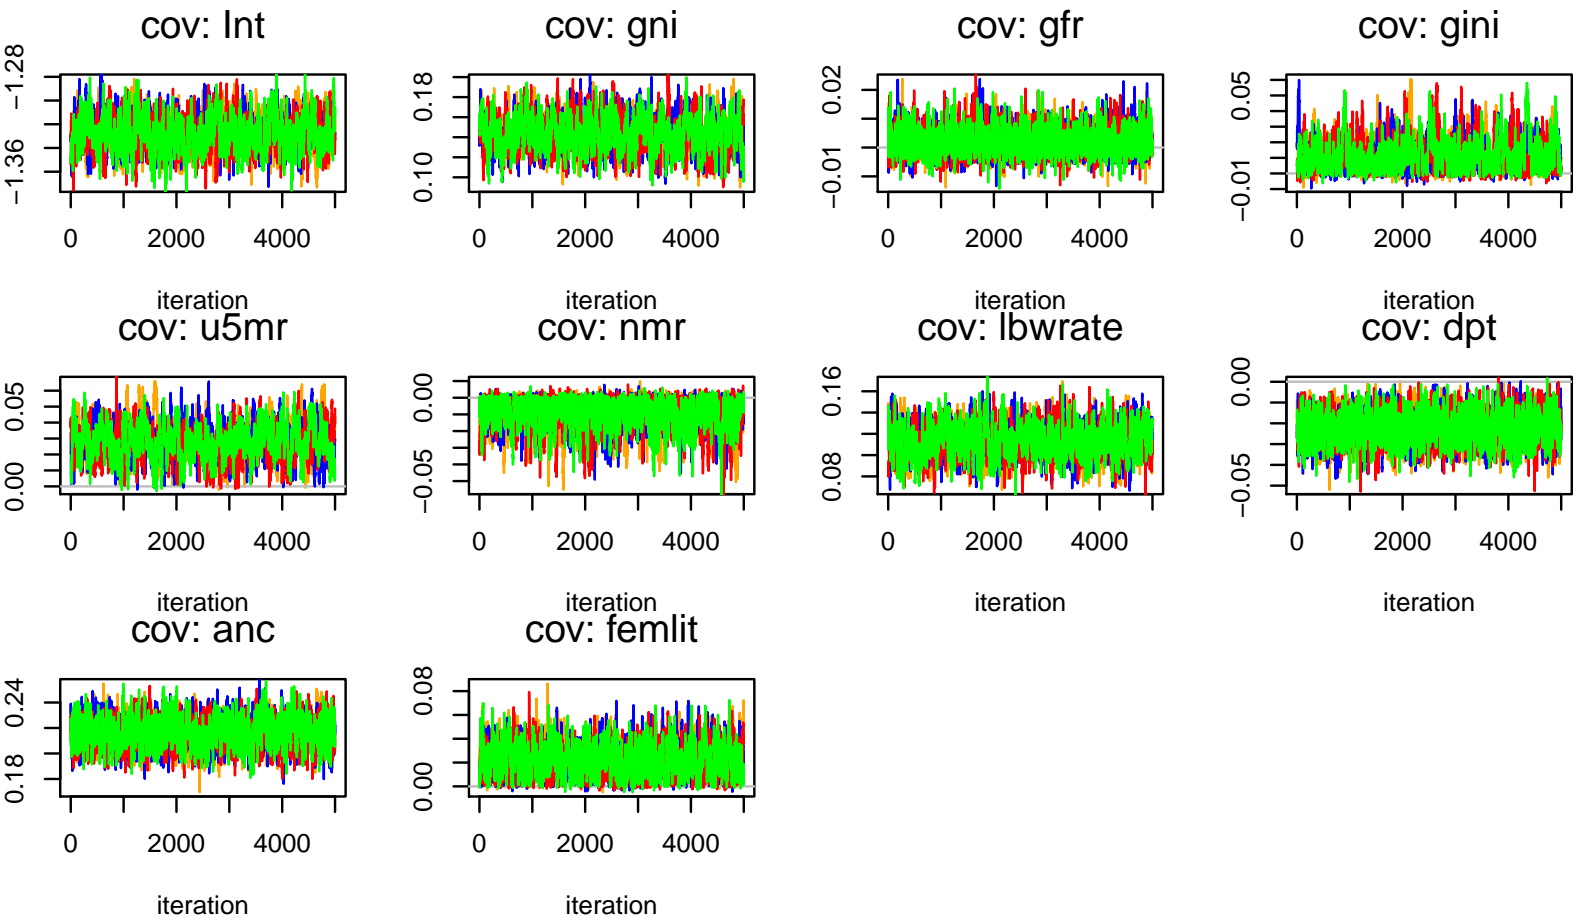

# High mortality model for neonates, cause: preterm

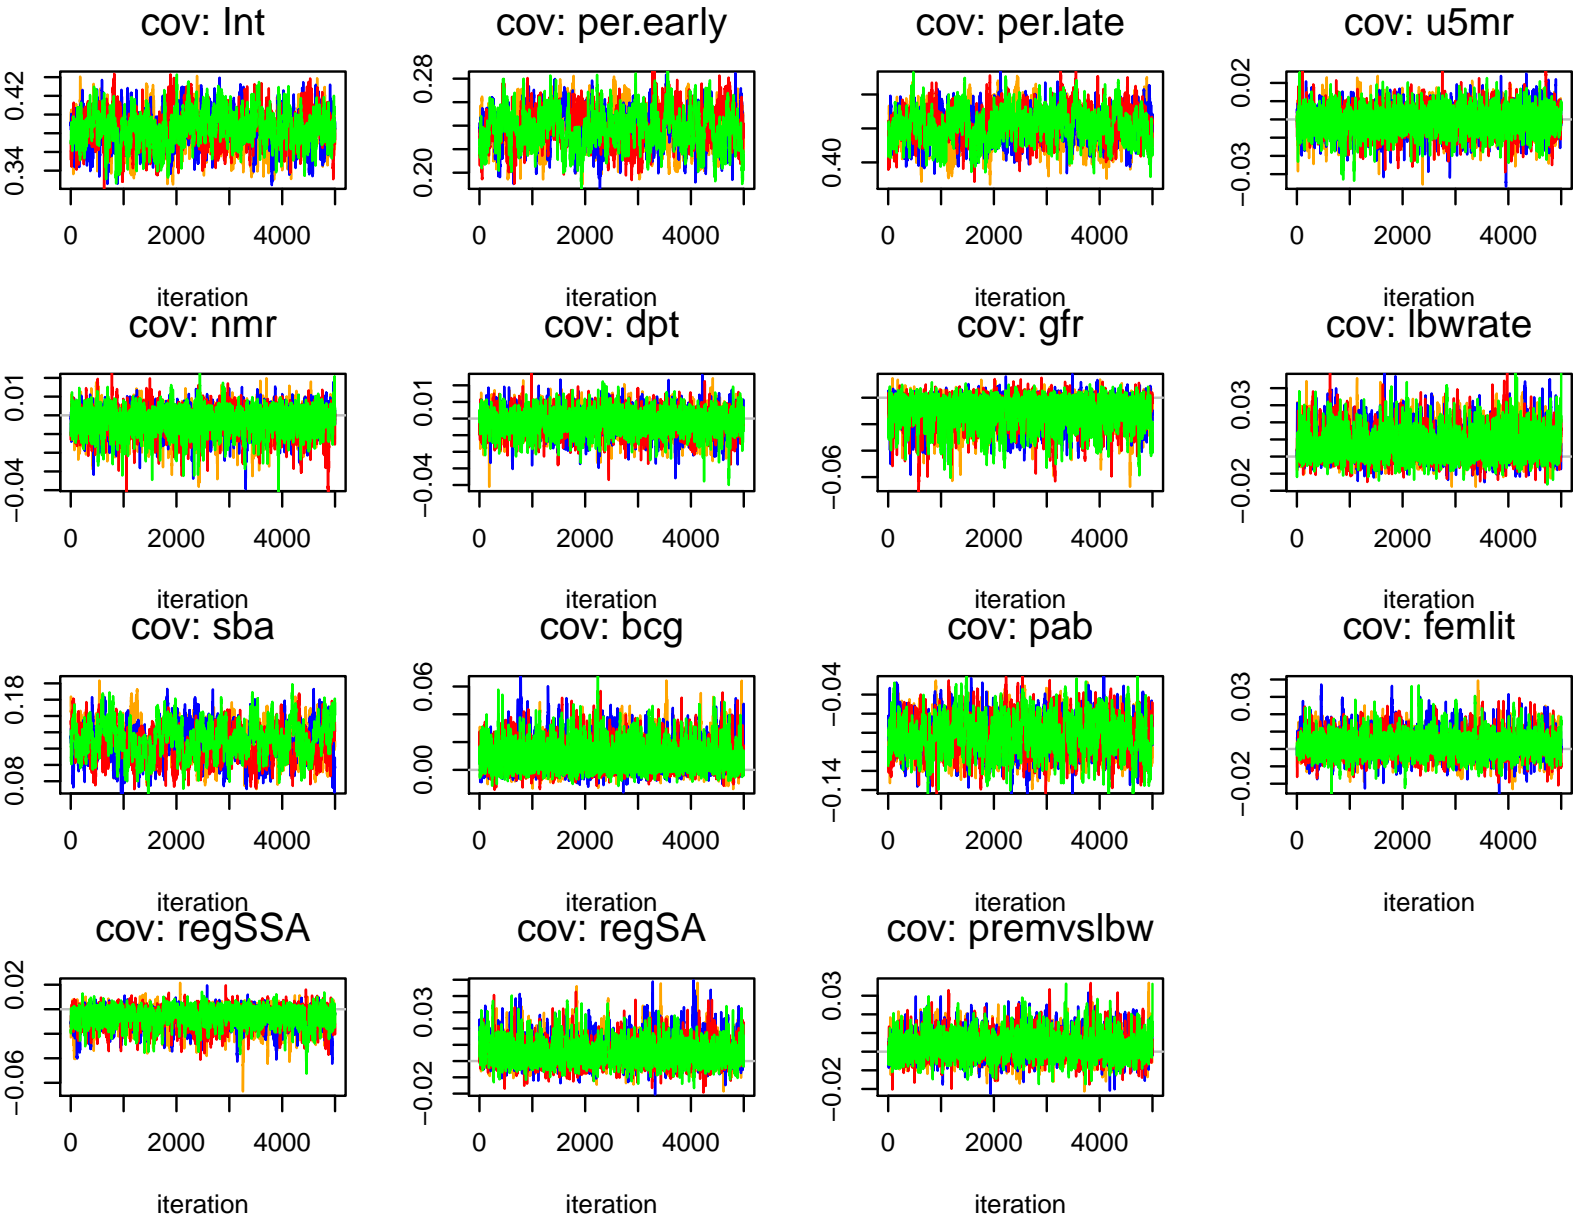

# High mortality model for neonates, cause: congenital

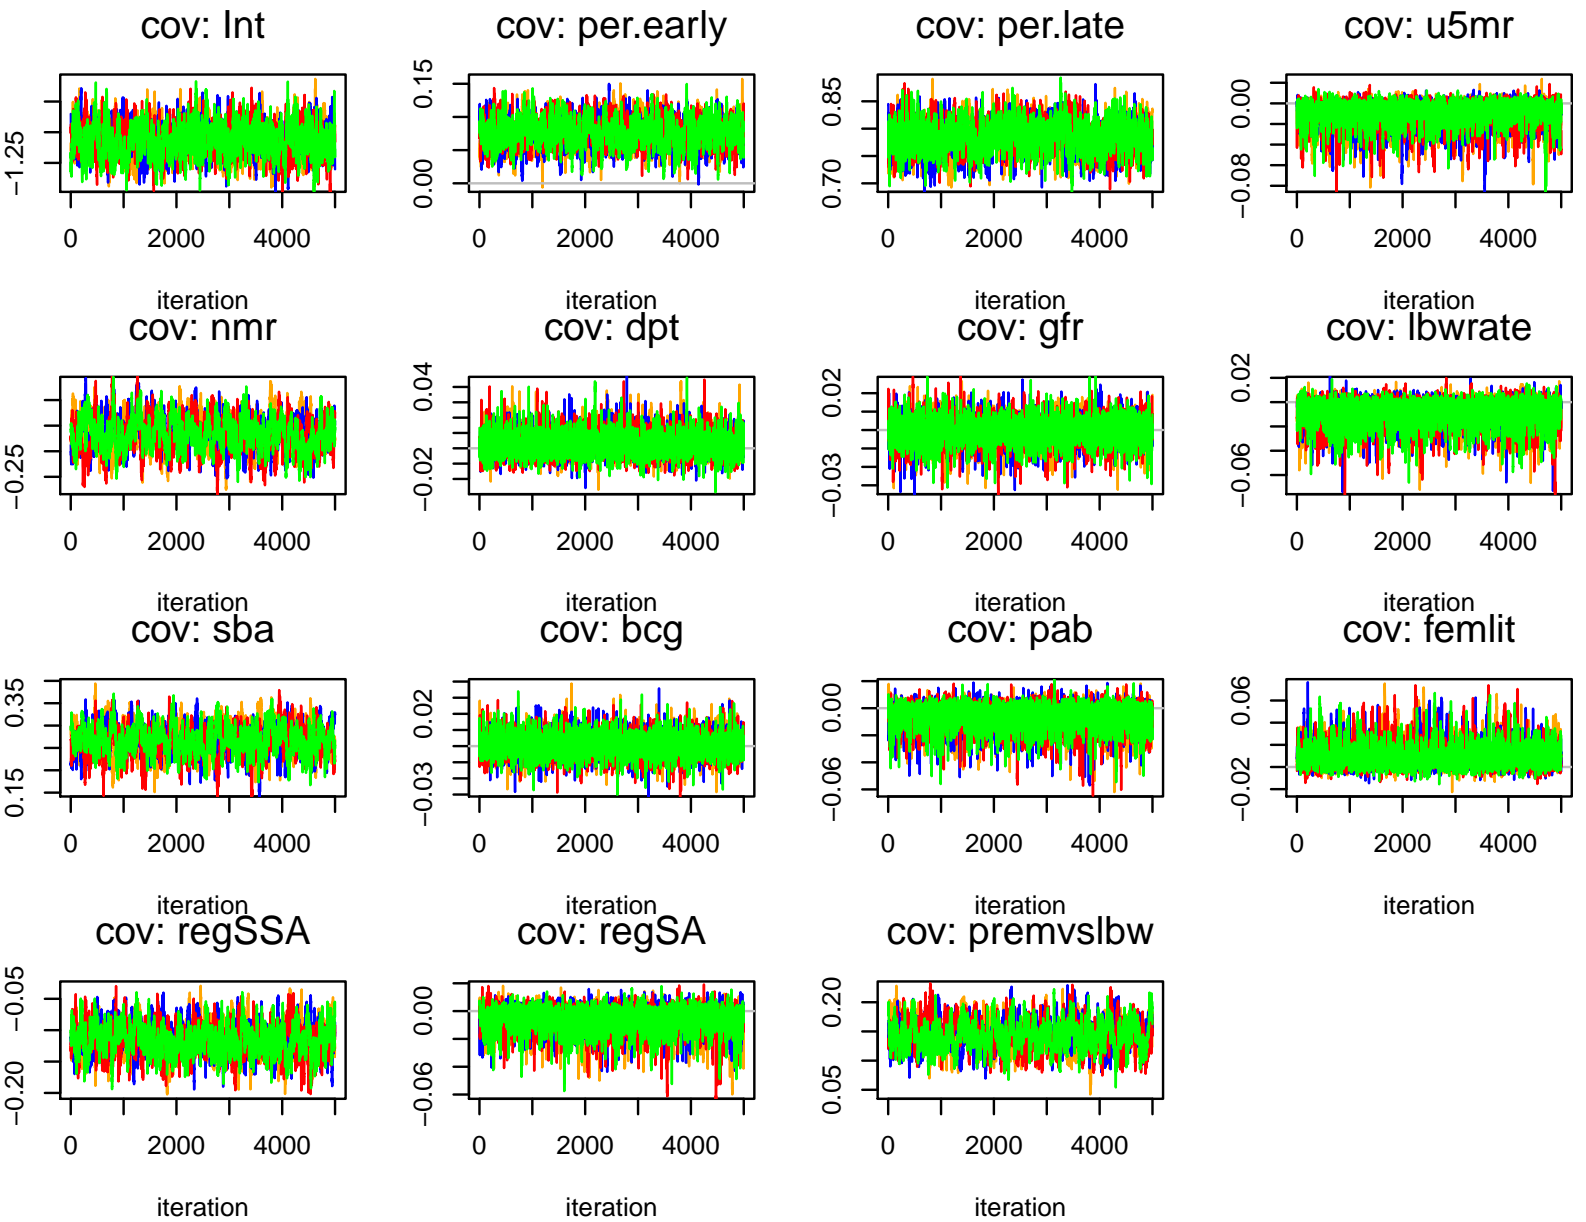

# High mortality model for neonates, cause: sepsis

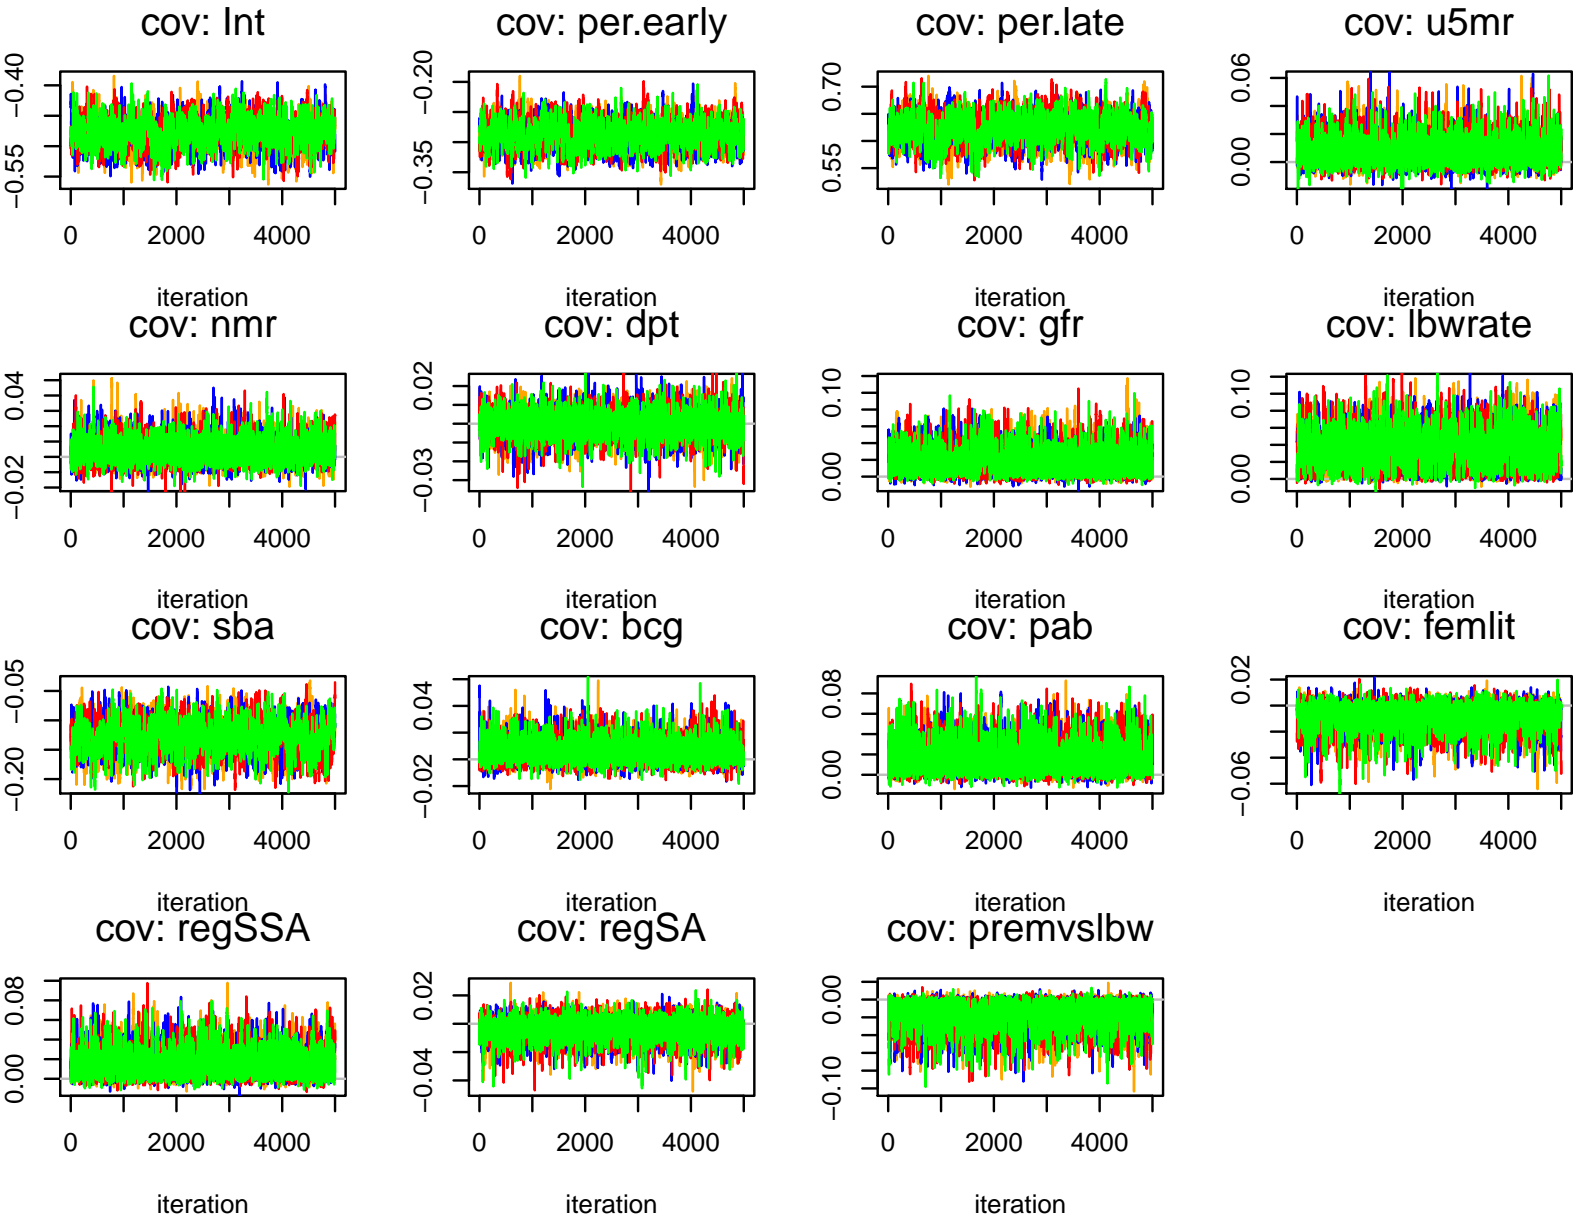

# High mortality model for neonates, cause: pneumonia

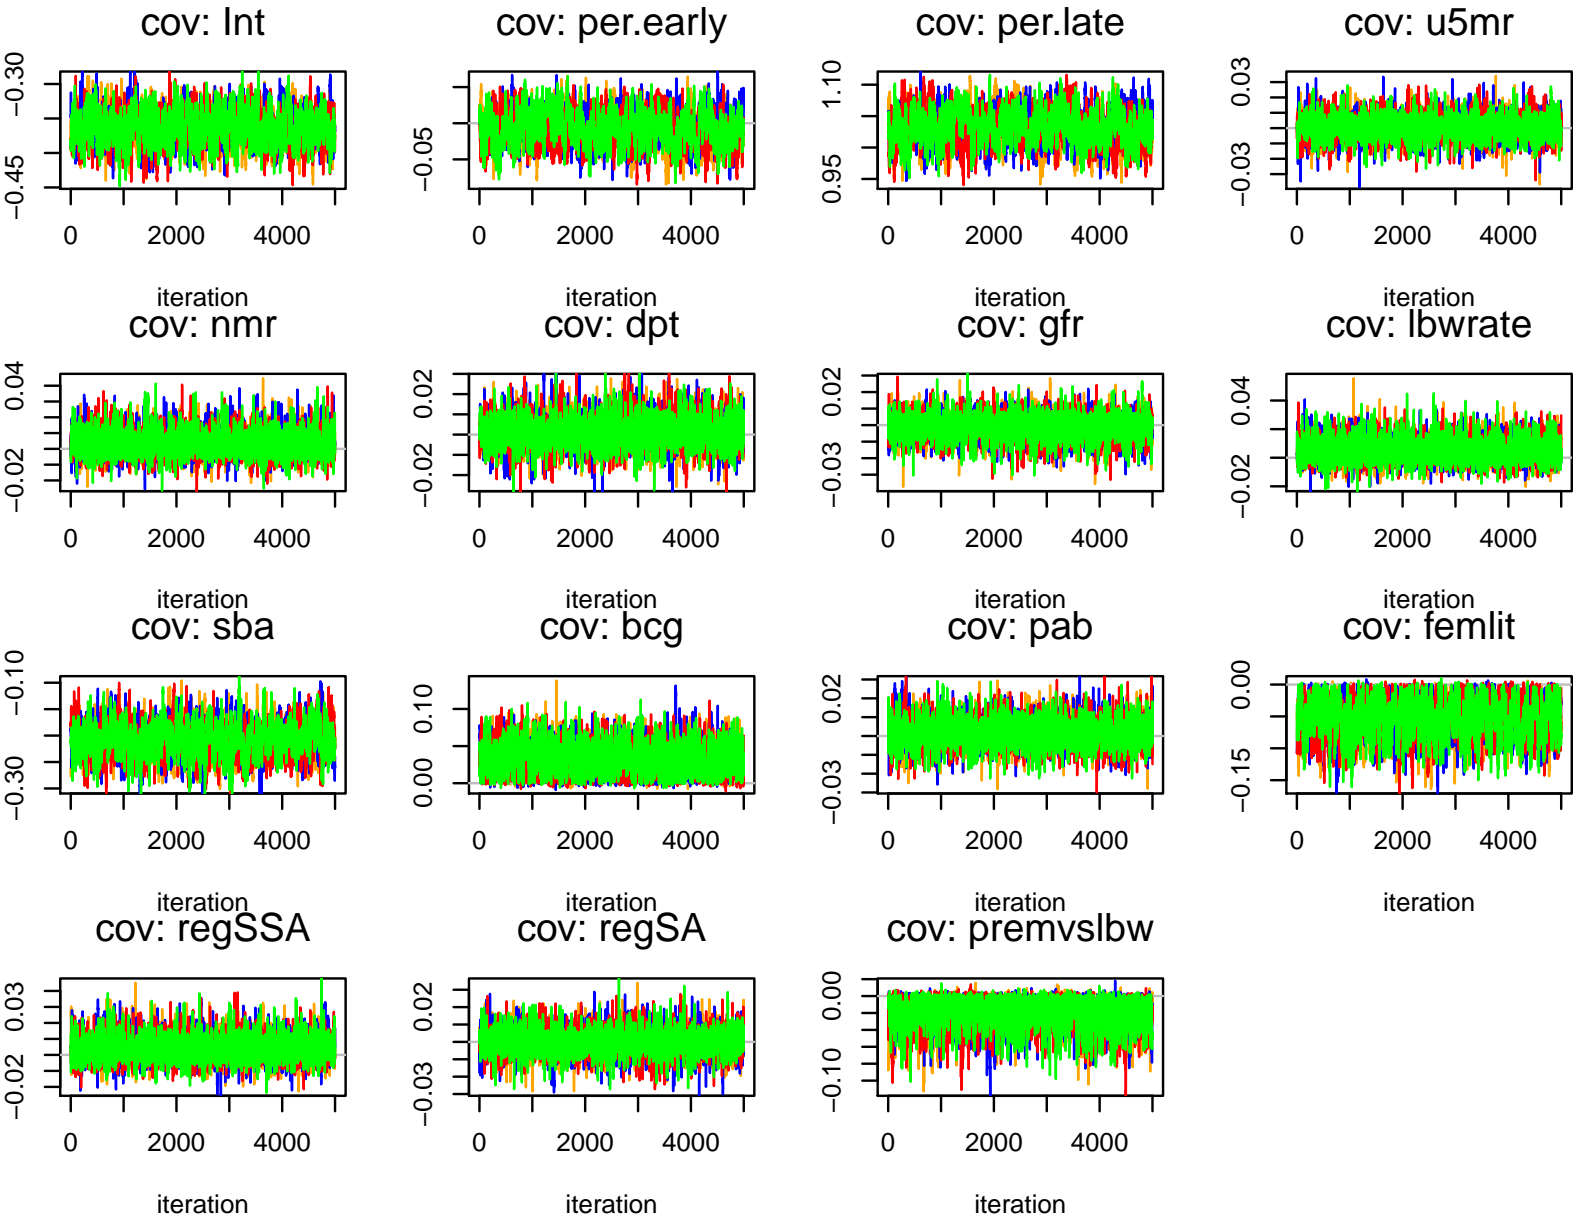

# High mortality model for neonates, cause: diarrhoea

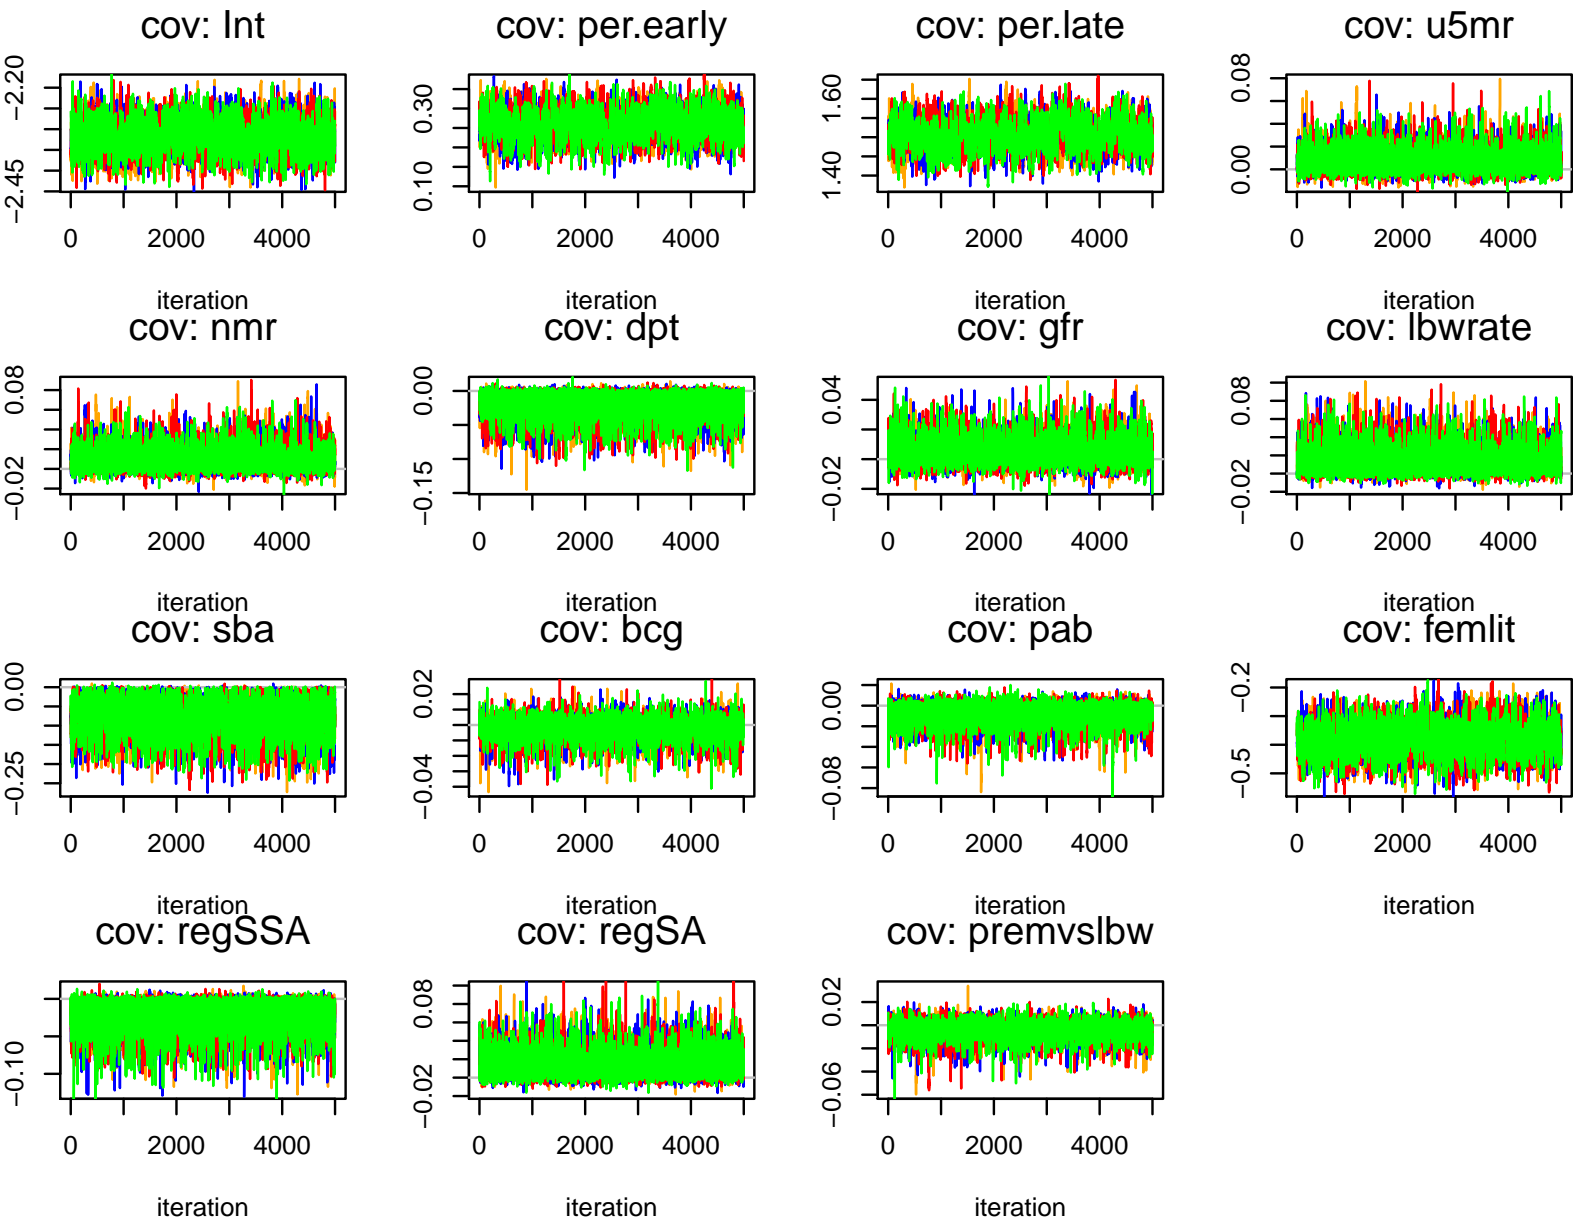

# High mortality model for neonates, cause: tetanus

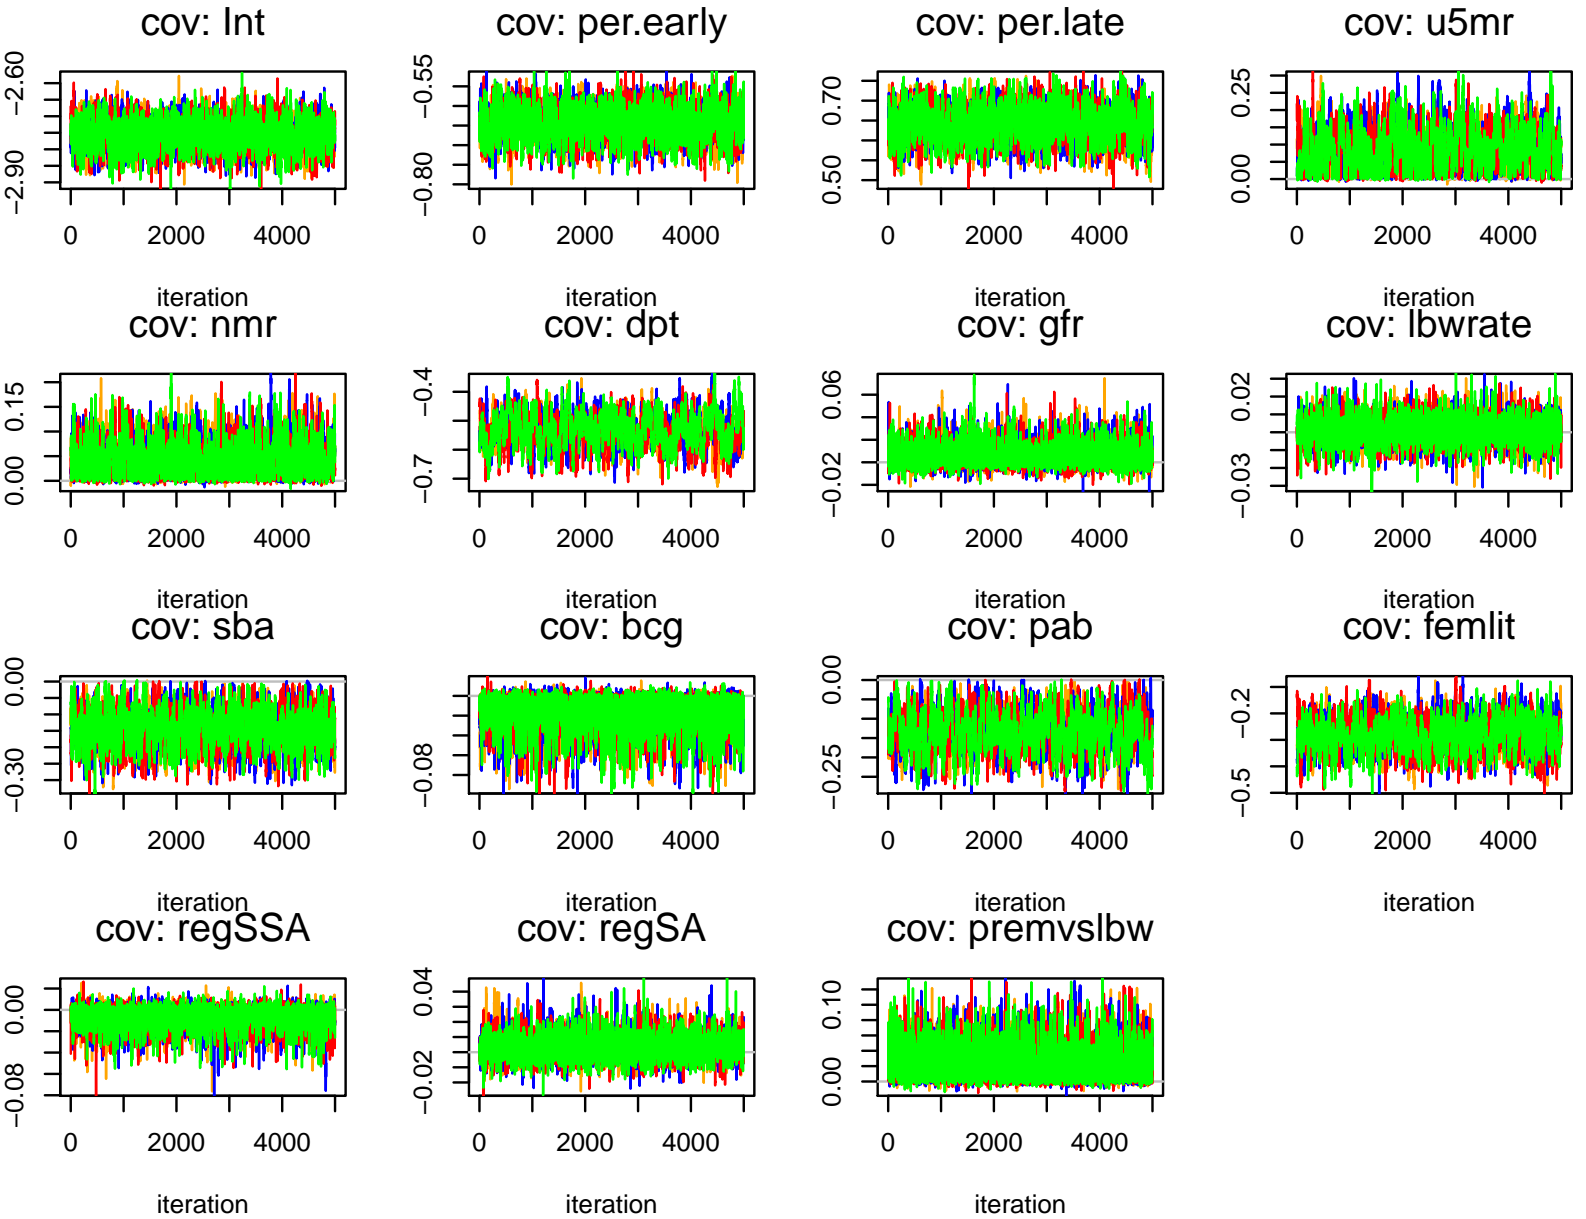



# High mortality model for neonates, cause: other

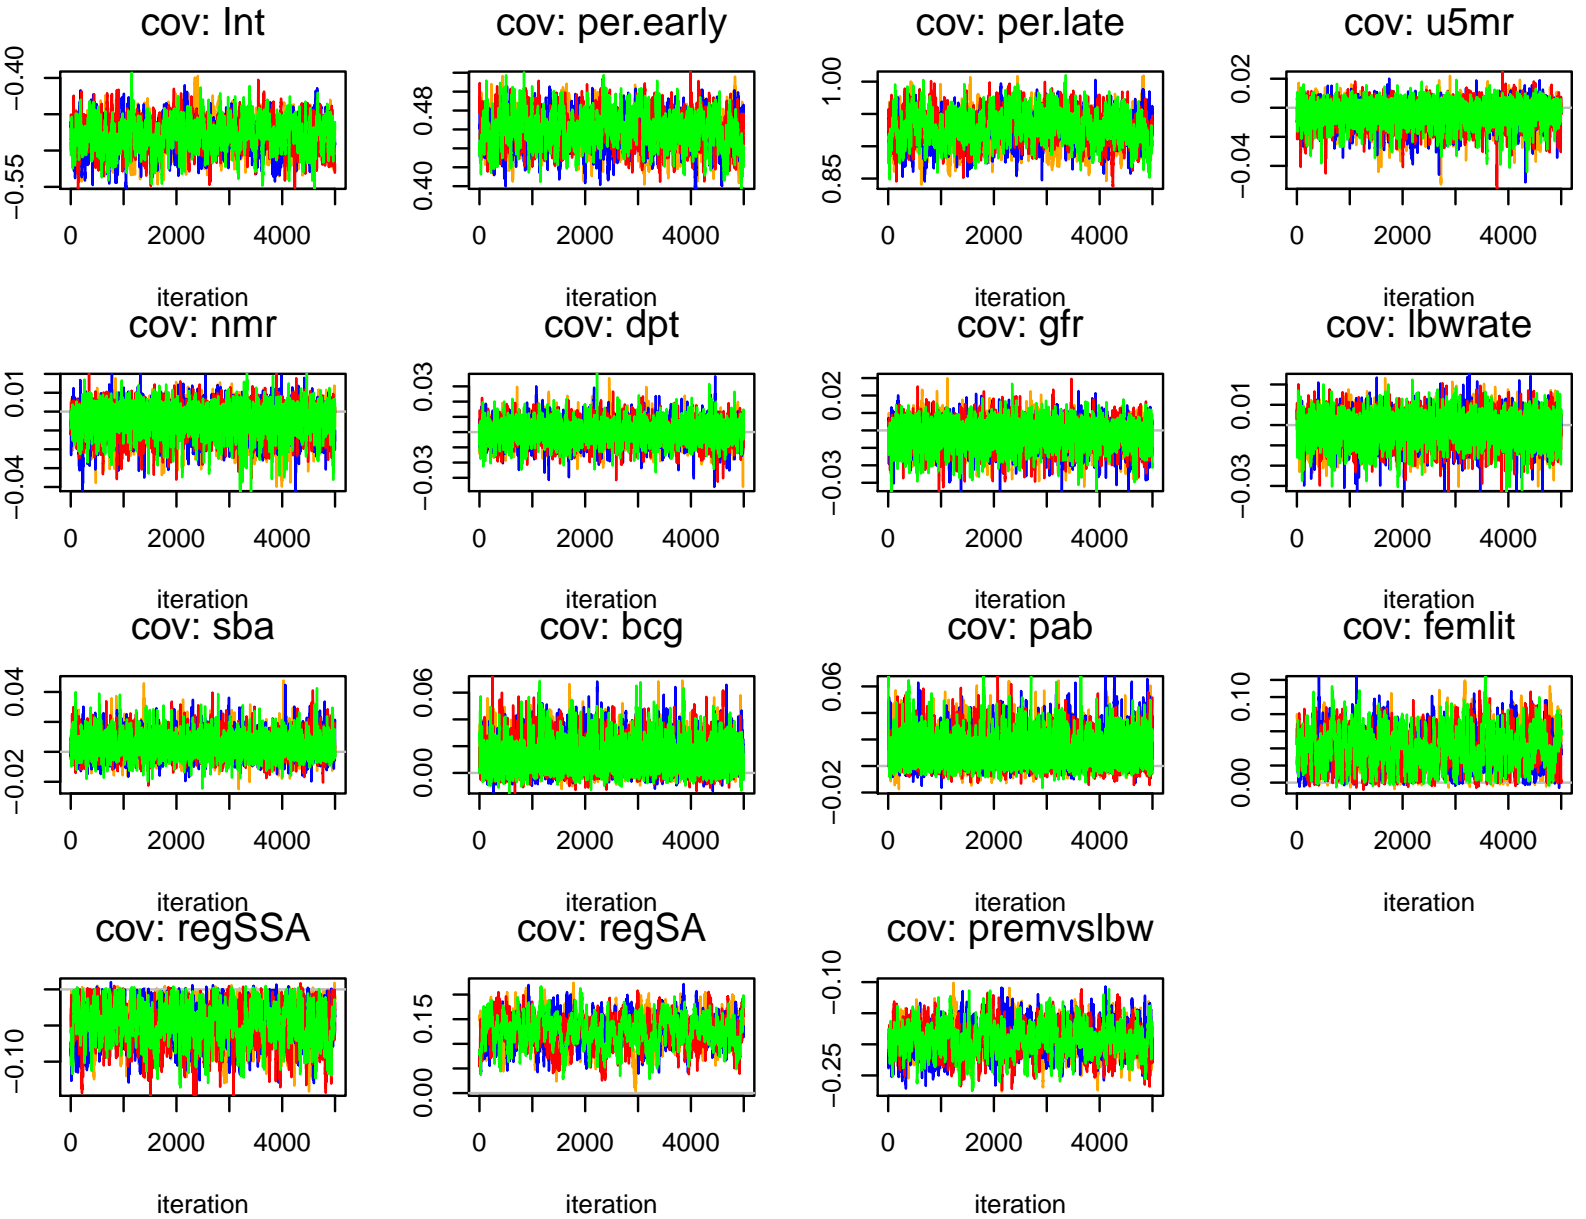

# Low mortality model for 1-59 months, cause: diarrhea

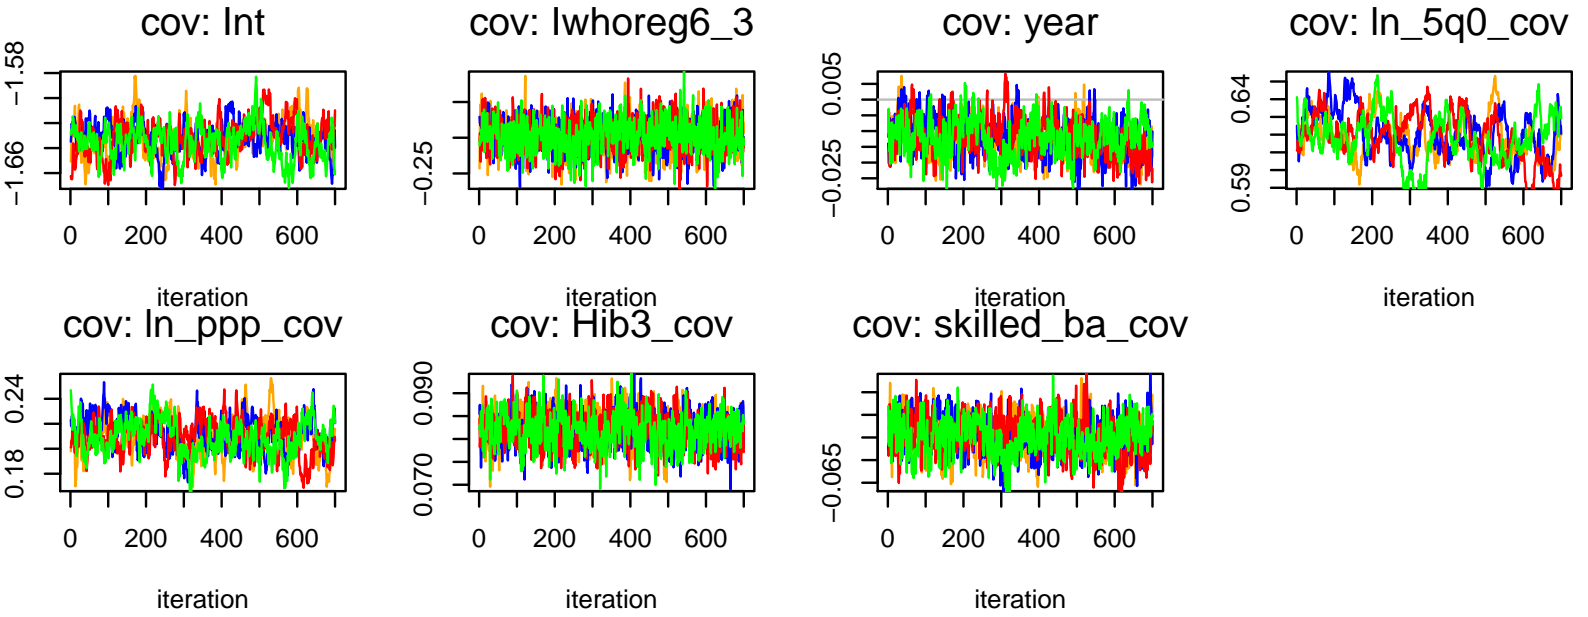

# Low mortality model for 1–59 months, cause: meningitis

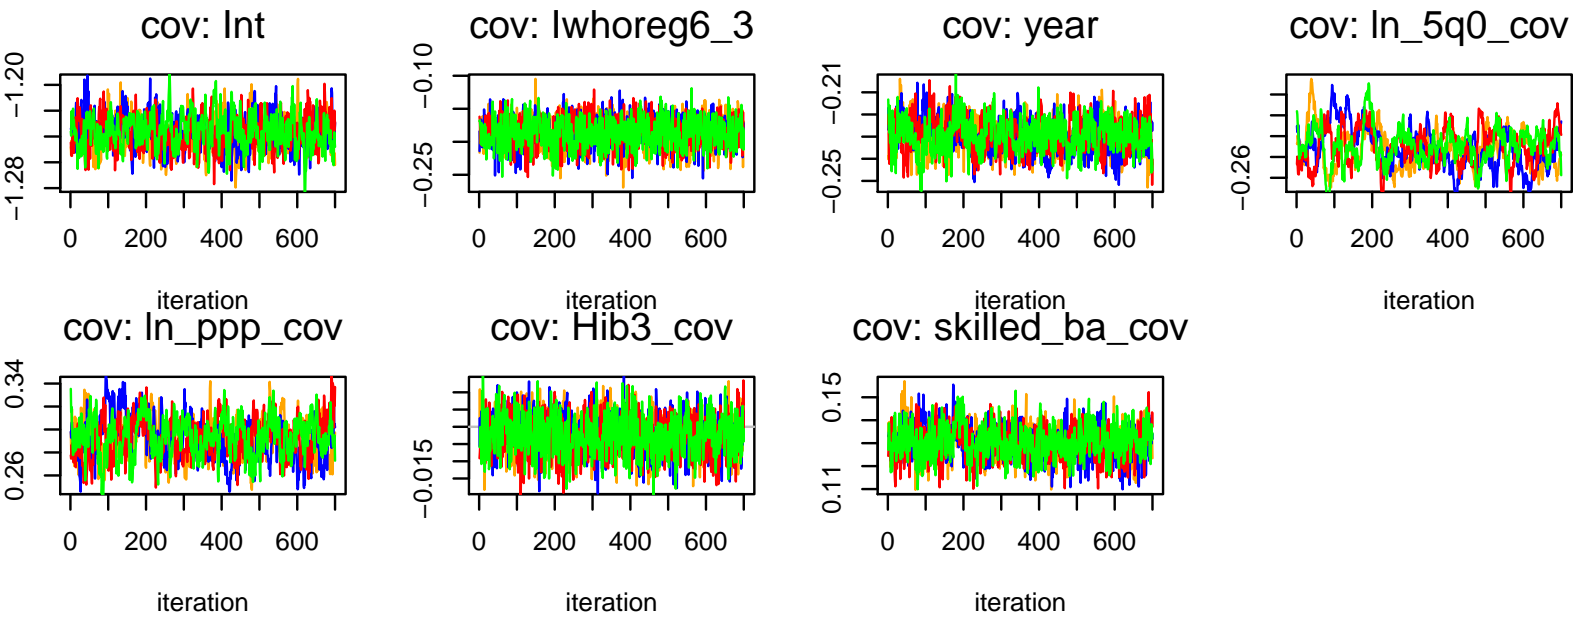

# Low mortality model for 1–59 months, cause: perinatal

cov: Int

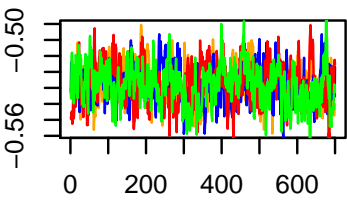

cov: lwhoreg6\_3

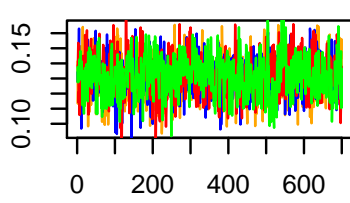

cov: year

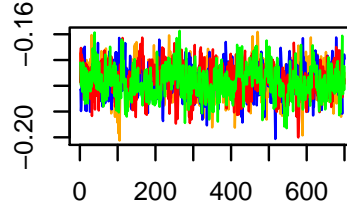

cov: ln\_5q0\_cov

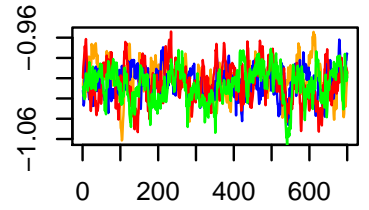

iteration  
cov: ln\_ppp\_cov

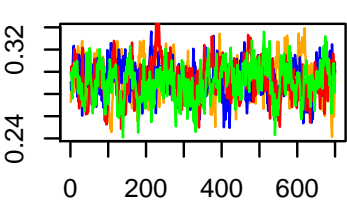

iteration  
cov: Hib3\_cov

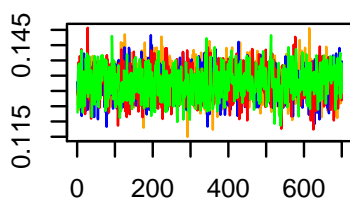

iteration  
cov: skilled\_ba\_cov

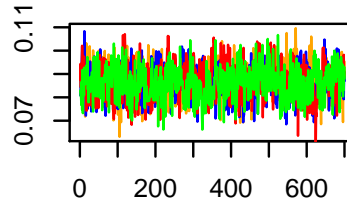

iteration

# Low mortality model for 1–59 months, cause: othergroup1

cov: Int

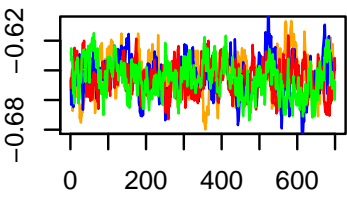

cov: lwhoreg6\_3

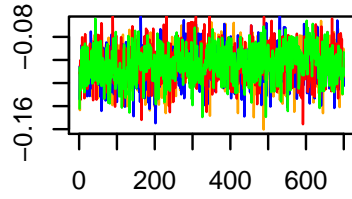

cov: year

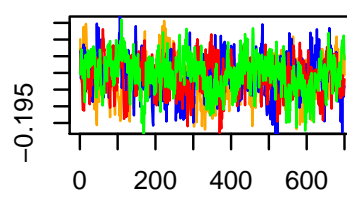

cov: ln\_5q0\_cov

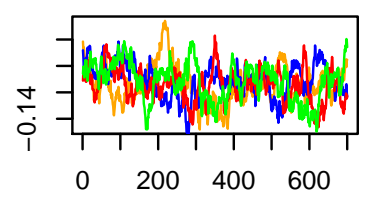

iteration  
cov: ln\_ppp\_cov

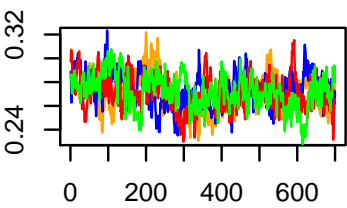

iteration  
cov: Hib3\_cov

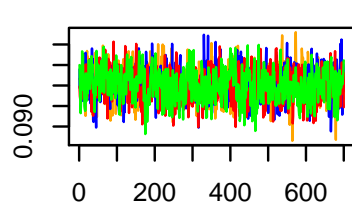

iteration  
cov: skilled\_ba\_cov

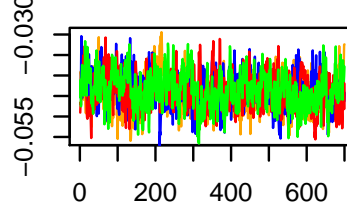

iteration

# Low mortality model for 1–59 months, cause: congenital

cov: Int

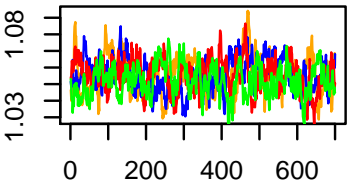

cov: lwhoreg6\_3

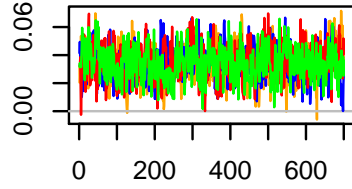

cov: year

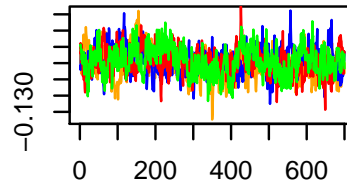

cov: ln\_5q0\_cov

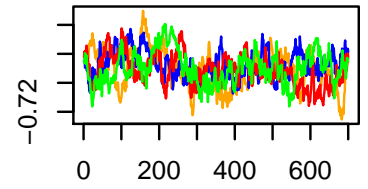

iteration  
cov: ln\_ppp\_cov

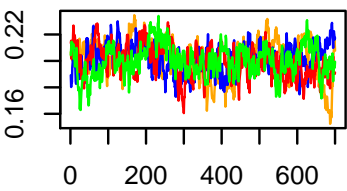

iteration  
cov: Hib3\_cov

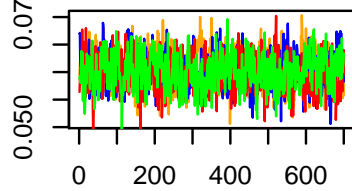

iteration  
cov: skilled\_ba\_cov

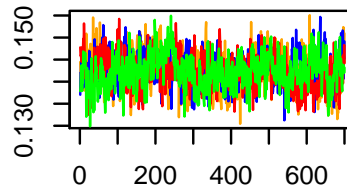

iteration

# Low mortality model for 1–59 months, cause: otherncd

cov: Int

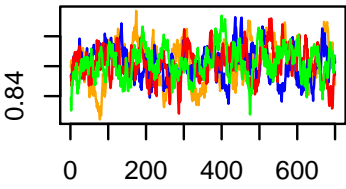

cov: lwhoreg6\_3

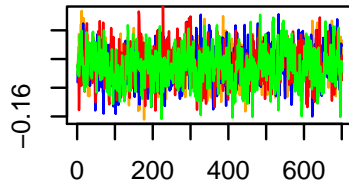

cov: year

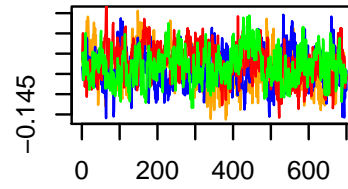

cov: ln\_5q0\_cov

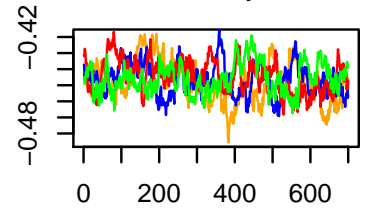

iteration  
cov: ln\_ppp\_cov

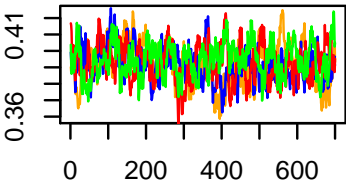

iteration  
cov: Hib3\_cov

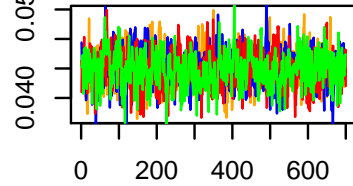

iteration  
cov: skilled\_ba\_cov

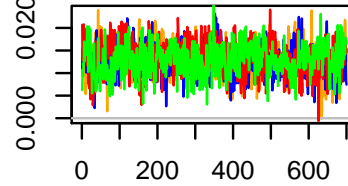

iteration

# Low mortality model for 1–59 months, cause: injuries

cov: Int

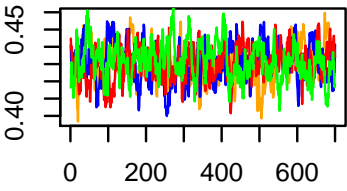

cov: lwhoreg6\_3

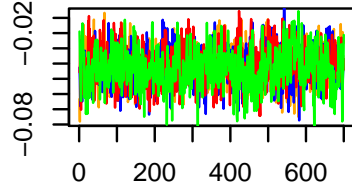

cov: year

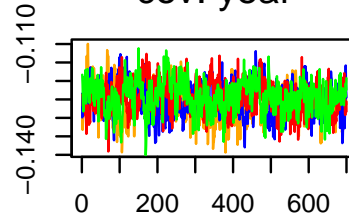

cov: ln\_5q0\_cov

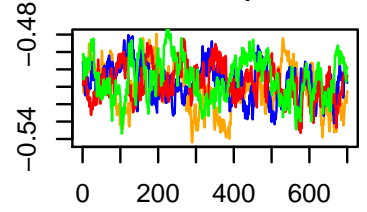

iteration  
cov: ln\_ppp\_cov

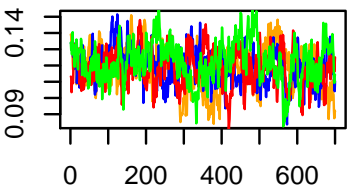

iteration  
cov: Hib3\_cov

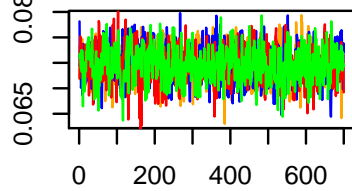

iteration  
cov: skilled\_ba\_cov

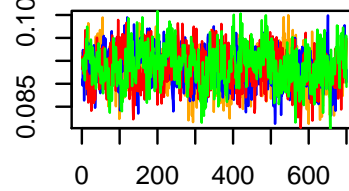

iteration



# High mortality model for 1–59 months, cause: injuries

cov: Int

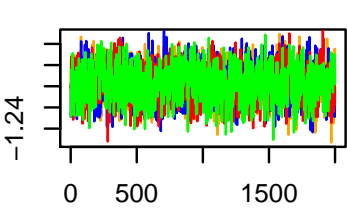

cov: lagelower\_1

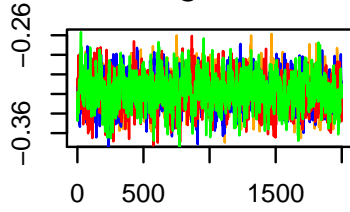

cov: u5mr

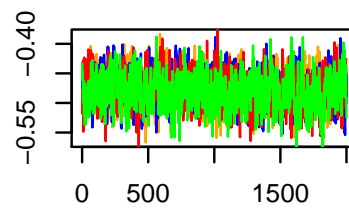

cov: pfpr

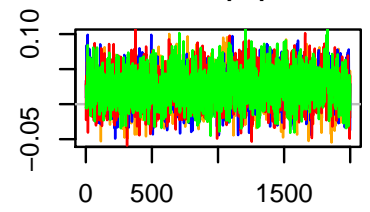

iteration  
cov: meningitis\_epi

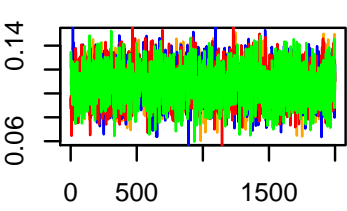

iteration  
cov: gni

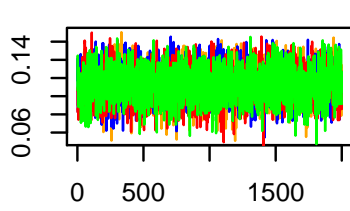

iteration  
cov: mcv

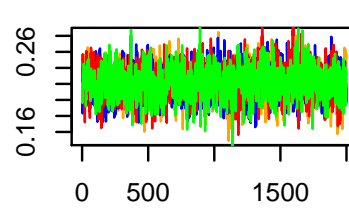

iteration  
cov: yr\_mid

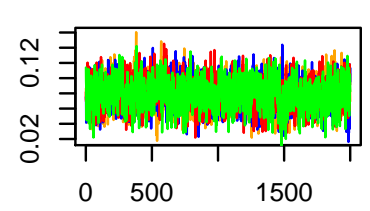

iteration  
cov: underwt

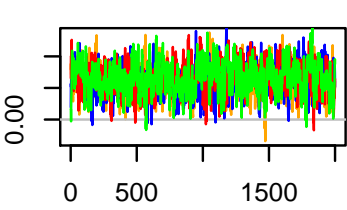

iteration  
cov: sanitation

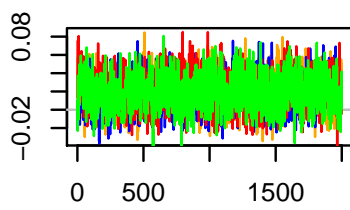

iteration

iteration

iteration

iteration

# High mortality model for 1–59 months, cause: malaria

cov: Int

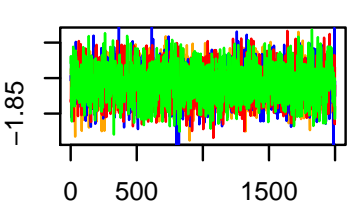

cov: lagelower\_1

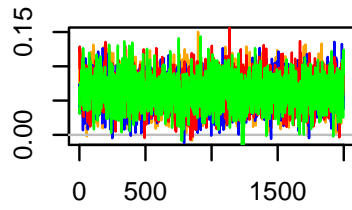

cov: u5mr

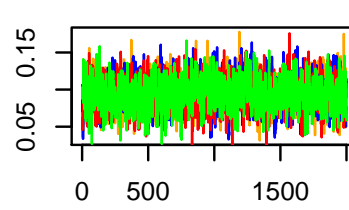

cov: pfpr

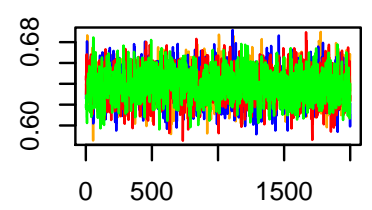

iteration  
cov: meningitis\_epi

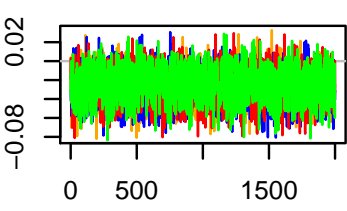

iteration  
cov: gni

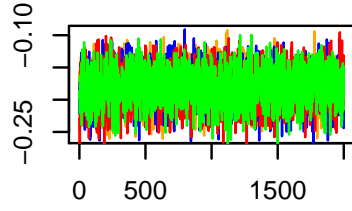

iteration  
cov: mcv

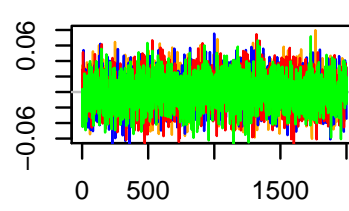

iteration  
cov: yr\_mid

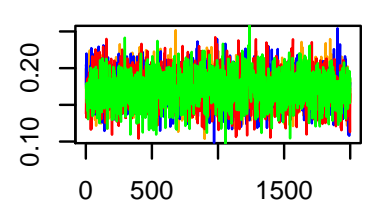

iteration  
cov: underwt

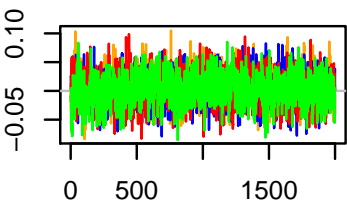

iteration  
cov: sanitation

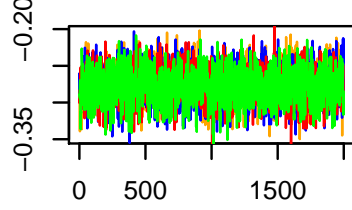

iteration

iteration

iteration

iteration

# High mortality model for 1–59 months, cause: meningitis

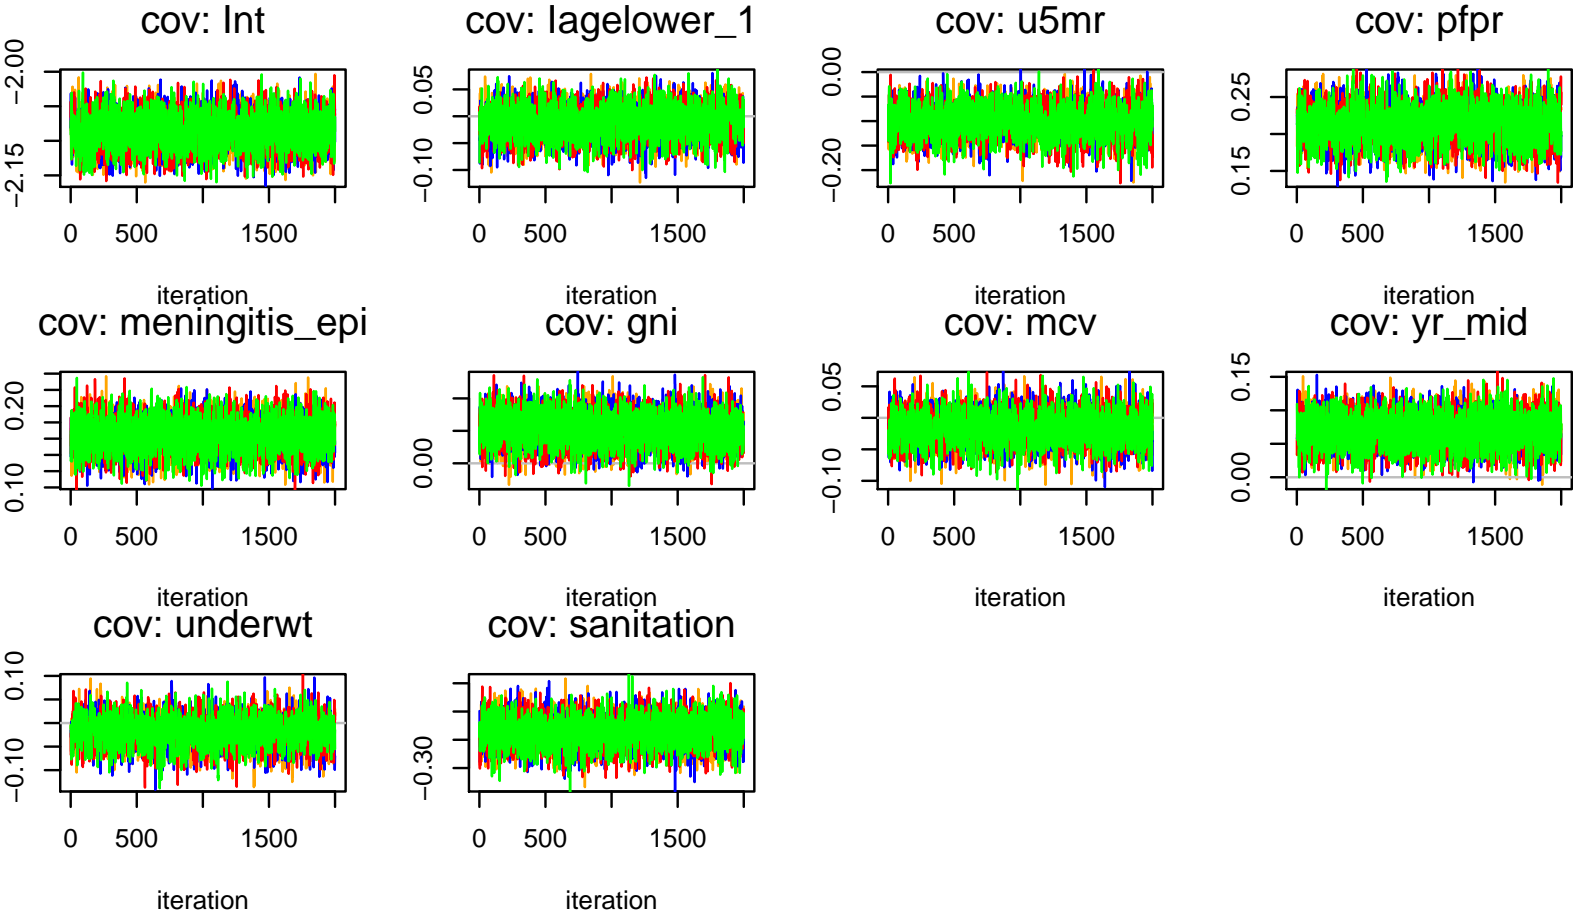

# High mortality model for 1–59 months, cause: other

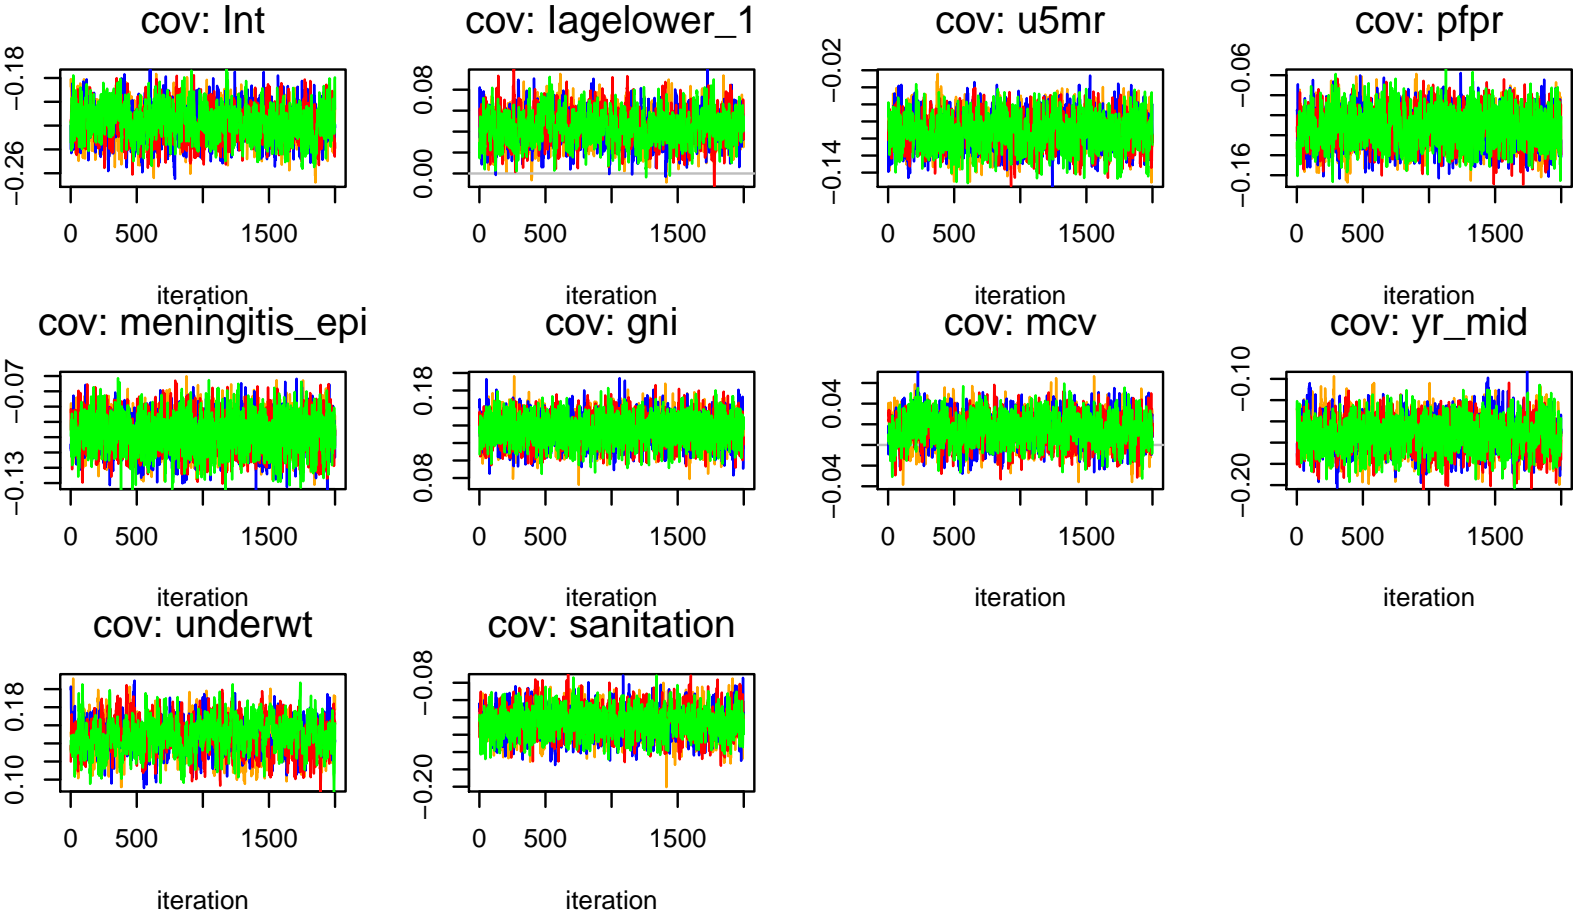

# High mortality model for 1–59 months, cause: diarrhea

cov: Int

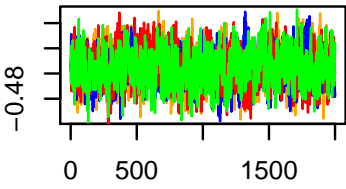

cov: lagelower\_1

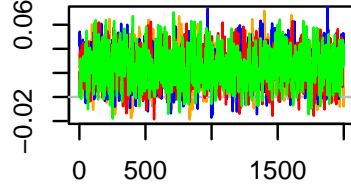

cov: u5mr

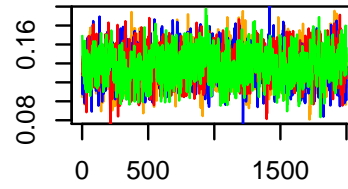

cov: pfpr

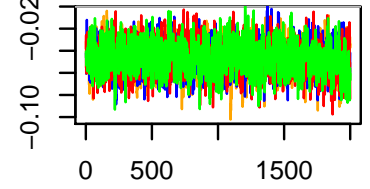

iteration  
cov: meningitis\_epi

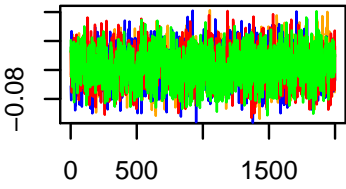

iteration  
cov: gni

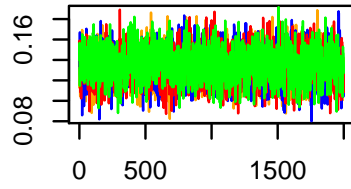

iteration  
cov: mcv

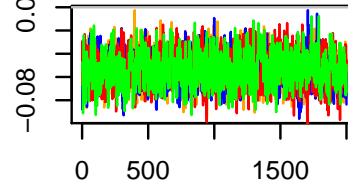

iteration  
cov: yr\_mid

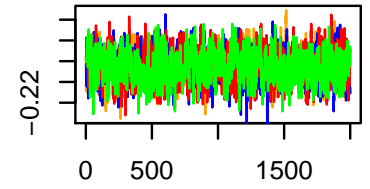

iteration  
cov: underwt

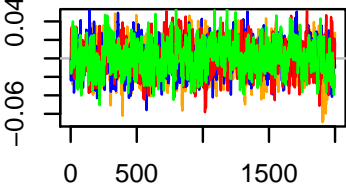

iteration  
cov: sanitation

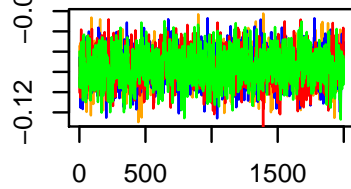

iteration

iteration

# High mortality model for 1–59 months, cause: neonatal

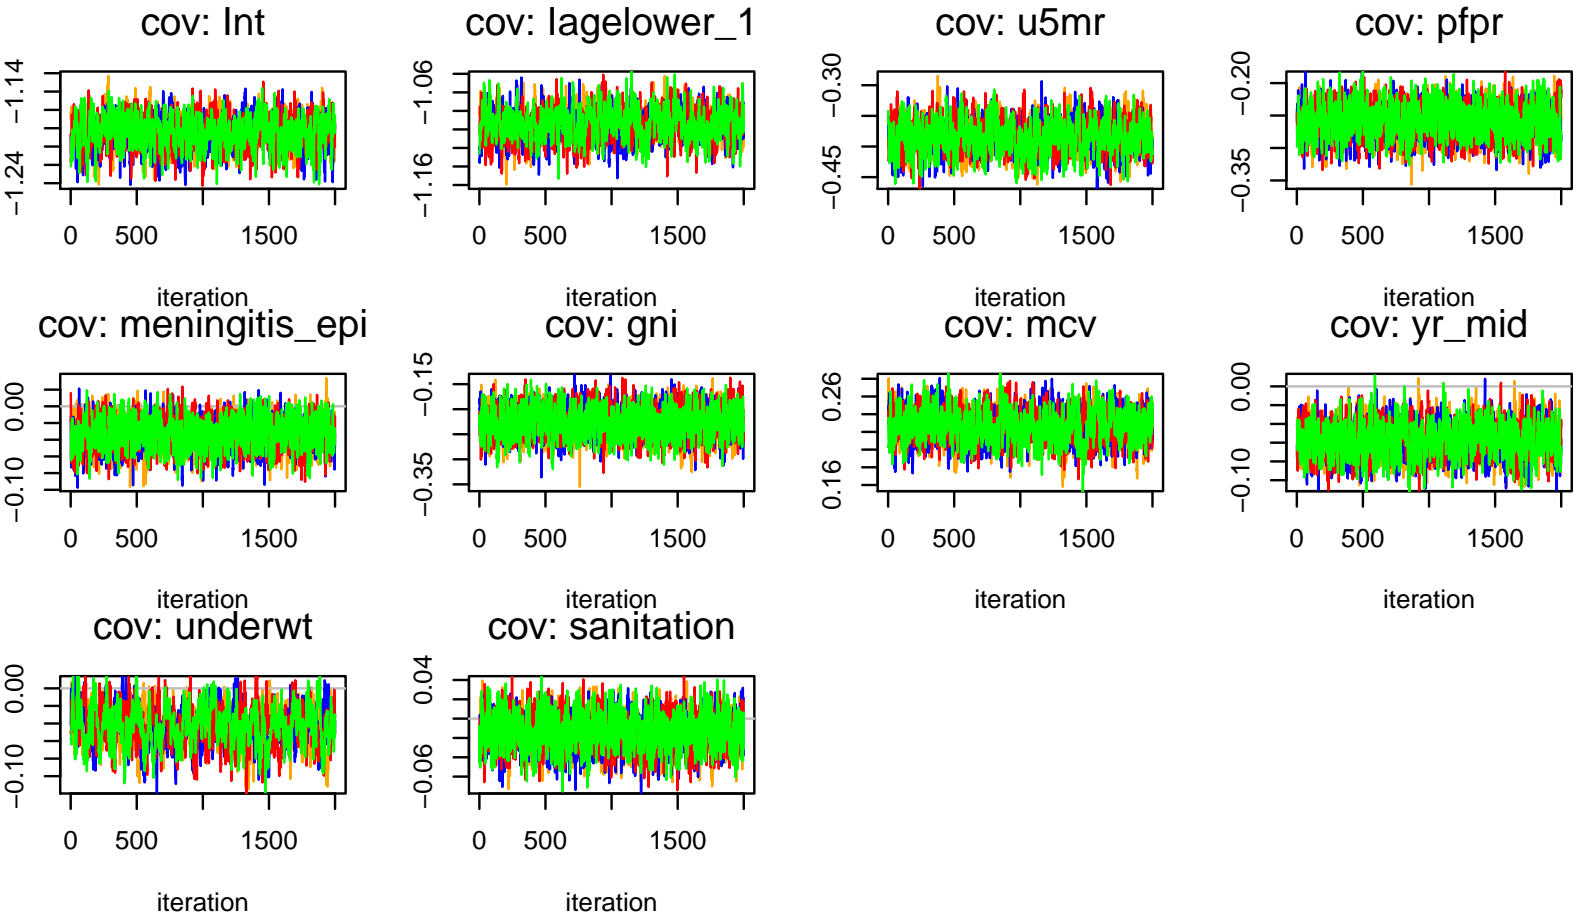

# High mortality model for 1–59 months, cause: congenital

cov: Int

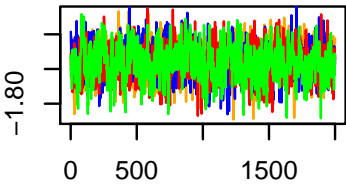

cov: lagelower\_1

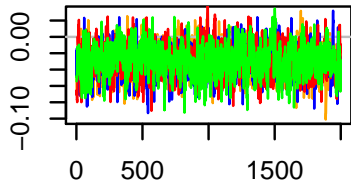

cov: u5mr

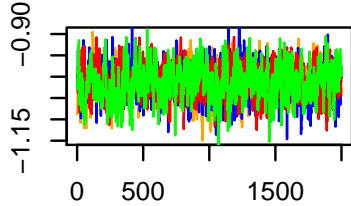

cov: pfpr

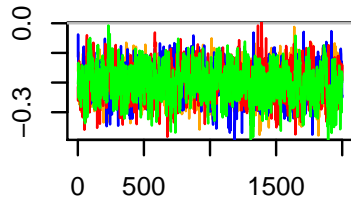

iteration  
cov: meningitis\_epi

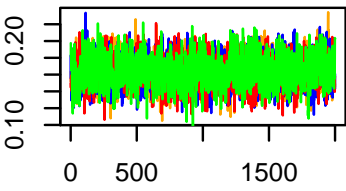

iteration  
cov: gni

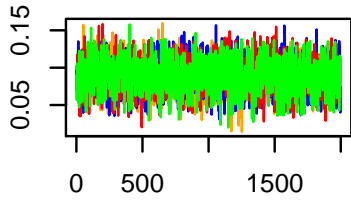

iteration  
cov: mcv

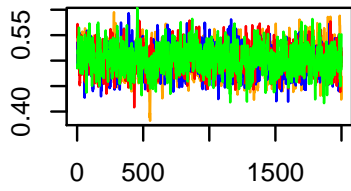

iteration  
cov: yr\_mid

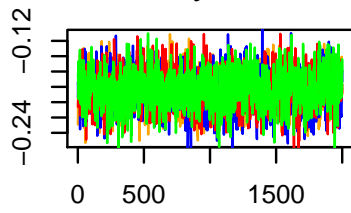

iteration  
cov: underwt

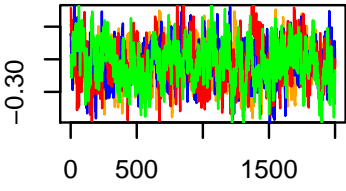

iteration  
cov: sanitation

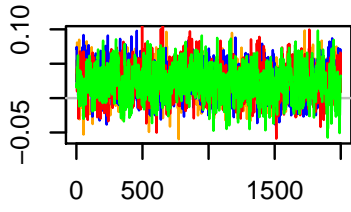

iteration

iteration

iteration

iteration

## **Appendix 6: GATHER checklist**



## Checklist of information that should be included in new reports of global health estimates

| Item #                                                                                                | Checklist item                                                                                                                                                                                                                                                                                                                                                                            | Reported on page #                                |
|-------------------------------------------------------------------------------------------------------|-------------------------------------------------------------------------------------------------------------------------------------------------------------------------------------------------------------------------------------------------------------------------------------------------------------------------------------------------------------------------------------------|---------------------------------------------------|
| <b>Objectives and funding</b>                                                                         |                                                                                                                                                                                                                                                                                                                                                                                           |                                                   |
| 1                                                                                                     | Define the indicator(s), populations (including age, sex, and geographic entities), and time period(s) for which estimates were made.                                                                                                                                                                                                                                                     | Introduction (4)                                  |
| 2                                                                                                     | List the funding sources for the work.                                                                                                                                                                                                                                                                                                                                                    | Panel (3)                                         |
| <b>Data Inputs</b>                                                                                    |                                                                                                                                                                                                                                                                                                                                                                                           |                                                   |
| <i>For all data inputs from multiple sources that are synthesized as part of the study:</i>           |                                                                                                                                                                                                                                                                                                                                                                                           |                                                   |
| 3                                                                                                     | Describe how the data were identified and how the data were accessed.                                                                                                                                                                                                                                                                                                                     | Methods (4)                                       |
| 4                                                                                                     | Specify the inclusion and exclusion criteria. Identify all ad-hoc exclusions.                                                                                                                                                                                                                                                                                                             | Methods (4)                                       |
| 5                                                                                                     | Provide information on all included data sources and their main characteristics. For each data source used, report reference information or contact name/institution, population represented, data collection method, year(s) of data collection, sex and age range, diagnostic criteria or measurement method, and sample size, as relevant.                                             | Methods (4); webappendix 1; previous publications |
| 6                                                                                                     | Identify and describe any categories of input data that have potentially important biases (e.g., based on characteristics listed in item 5).                                                                                                                                                                                                                                              | Previous publications                             |
| <i>For data inputs that contribute to the analysis but were not synthesized as part of the study:</i> |                                                                                                                                                                                                                                                                                                                                                                                           |                                                   |
| 7                                                                                                     | Describe and give sources for any other data inputs.                                                                                                                                                                                                                                                                                                                                      | Methods (6) and previous publications             |
| <i>For all data inputs:</i>                                                                           |                                                                                                                                                                                                                                                                                                                                                                                           |                                                   |
| 8                                                                                                     | Provide all data inputs in a file format from which data can be efficiently extracted (e.g., a spreadsheet rather than a PDF), including all relevant meta-data listed in item 5. For any data inputs that cannot be shared because of ethical or legal reasons, such as third-party ownership, provide a contact name or the name of the institution that retains the right to the data. | Provided via dropbox                              |
| <b>Data analysis</b>                                                                                  |                                                                                                                                                                                                                                                                                                                                                                                           |                                                   |
| 9                                                                                                     | Provide a conceptual overview of the data analysis method. A diagram may be helpful.                                                                                                                                                                                                                                                                                                      | Previous publications                             |
| 10                                                                                                    | Provide a detailed description of all steps of the analysis, including mathematical formulae. This description should cover, as relevant, data cleaning, data pre-processing, data adjustments and weighting of data sources, and mathematical or statistical model(s).                                                                                                                   | Methods                                           |
| 11                                                                                                    | Describe how candidate models were evaluated and how the final model(s) were selected.                                                                                                                                                                                                                                                                                                    | In the introduction to the methods                |
| 12                                                                                                    | Provide the results of an evaluation of model performance, if done, as well as the results of any relevant sensitivity analysis.                                                                                                                                                                                                                                                          | Webappendix 2                                     |
| 13                                                                                                    | Describe methods for calculating uncertainty of the estimates. State which sources of uncertainty were, and were not, accounted for in the uncertainty analysis.                                                                                                                                                                                                                          | Methods (7) and Discussion (11)                   |
| 14                                                                                                    | State how analytic or statistical source code used to generate estimates can be accessed.                                                                                                                                                                                                                                                                                                 | Code provided via dropbox                         |
| <b>Results and Discussion</b>                                                                         |                                                                                                                                                                                                                                                                                                                                                                                           |                                                   |

|           |                                                                                                                                                          |                               |
|-----------|----------------------------------------------------------------------------------------------------------------------------------------------------------|-------------------------------|
| <b>15</b> | Provide published estimates in a file format from which data can be efficiently extracted.                                                               | provided via dropbox          |
| <b>16</b> | Report a quantitative measure of the uncertainty of the estimates (e.g. uncertainty intervals).                                                          | Throughout results section    |
| <b>17</b> | Interpret results in light of existing evidence. If updating a previous set of estimates, describe the reasons for changes in estimates.                 | Throughout discussion section |
| <b>18</b> | Discuss limitations of the estimates. Include a discussion of any modelling assumptions or data limitations that affect interpretation of the estimates. | At the end of the discussion  |

*This checklist should be used in conjunction with the GATHER statement and Explanation and Elaboration document, found on [gather-statement.org](http://gather-statement.org)*



## Appendix 7: Countries with very low under-5 mortality

Countries with very low mortality for children under five years of age in 2019 (less than 25 per 1000 livebirths)

| ISO3 | Country name                                         | ISO3 | Country name                          |
|------|------------------------------------------------------|------|---------------------------------------|
| ALB  | Albania                                              | LBN  | Lebanon                               |
| AND  | Andorra                                              | LBY  | Libya                                 |
| ARE  | United Arab Emirates                                 | LCA  | Saint Lucia                           |
| ARG  | Argentina                                            | LKA  | Sri Lanka                             |
| ARM  | Armenia                                              | LTU  | Lithuania                             |
| ATG  | Antigua and Barbuda                                  | LUX  | Luxembourg                            |
| AUS  | Australia                                            | LVA  | Latvia                                |
| AUT  | Austria                                              | MAR  | Morocco                               |
| AZE  | Azerbaijan                                           | MCO  | Monaco                                |
| BEL  | Belgium                                              | MDA  | Republic of Moldova                   |
| BGR  | Bulgaria                                             | MDV  | Maldives                              |
| BHR  | Bahrain                                              | MEX  | Mexico                                |
| BHS  | Bahamas                                              | MKD  | Republic of North Macedonia           |
| BIH  | Bosnia and Herzegovina                               | MLT  | Malta                                 |
| BLR  | Belarus                                              | MNE  | Montenegro                            |
| BLZ  | Belize                                               | MNG  | Mongolia                              |
| BRA  | Brazil                                               | MUS  | Mauritius                             |
| BRB  | Barbados                                             | MYS  | Malaysia                              |
| BRN  | Brunei Darussalam                                    | NIC  | Nicaragua                             |
| CAN  | Canada                                               | NIU  | Niue                                  |
| CHE  | Switzerland                                          | NLD  | Netherlands                           |
| CHL  | Chile                                                | NOR  | Norway                                |
| CHN  | China                                                | NZL  | New Zealand                           |
| COK  | Cook Islands                                         | OMN  | Oman                                  |
| COL  | Colombia                                             | PAN  | Panama                                |
| CPV  | Cabo Verde                                           | PER  | Peru                                  |
| CRI  | Costa Rica                                           | PLW  | Palau                                 |
| CUB  | Cuba                                                 | POL  | Poland                                |
| CYP  | Cyprus                                               | PRK  | Democratic People's Republic of Korea |
| CZE  | Czechia                                              | PRT  | Portugal                              |
| DEU  | Germany                                              | PRY  | Paraguay                              |
| DNK  | Denmark                                              | QAT  | Qatar                                 |
| DZA  | Algeria                                              | ROU  | Romania                               |
| ECU  | Ecuador                                              | RUS  | Russian Federation                    |
| EGY  | Egypt                                                | SAU  | Saudi Arabia                          |
| ESP  | Spain                                                | SGP  | Singapore                             |
| EST  | Estonia                                              | SLB  | Solomon Islands                       |
| FIN  | Finland                                              | SLV  | El Salvador                           |
| FRA  | France                                               | SMR  | San Marino                            |
| GBR  | United Kingdom of Great Britain and Northern Ireland | SRB  | Serbia                                |
| GEO  | Georgia                                              | SUR  | Suriname                              |
| GRC  | Greece                                               | SVK  | Slovakia                              |
| GRD  | Grenada                                              | SVN  | Slovenia                              |
| GTM  | Guatemala                                            | SWE  | Sweden                                |
| HND  | Honduras                                             | SYC  | Seychelles                            |
| HRV  | Croatia                                              | SYR  | Syrian Arab Republic                  |
| HUN  | Hungary                                              | THA  | Thailand                              |
| IDN  | Indonesia                                            | TON  | Tonga                                 |
| IRL  | Ireland                                              | TTO  | Trinidad and Tobago                   |
| IRN  | Iran (Islamic Republic of)                           | TUN  | Tunisia                               |
| ISL  | Iceland                                              | TUR  | Turkey                                |
| ISR  | Israel                                               | TUV  | Tuvalu                                |
| ITA  | Italy                                                | UKR  | Ukraine                               |
| JAM  | Jamaica                                              | URY  | Uruguay                               |
| JOR  | Jordan                                               | USA  | United States of America              |
| JPN  | Japan                                                | UZB  | Uzbekistan                            |
| KAZ  | Kazakhstan                                           | VCT  | Saint Vincent and the Grenadines      |
| KGZ  | Kyrgyzstan                                           | VEN  | Venezuela (Bolivarian Republic of)    |
| KNA  | Saint Kitts and Nevis                                | VNM  | Viet Nam                              |
| KOR  | Republic of Korea                                    | WSM  | Samoa                                 |
| KWT  | Kuwait                                               |      |                                       |

## **Appendix 8: Distribution of causes of child death in UNICEF regions in 2000 and 2019**



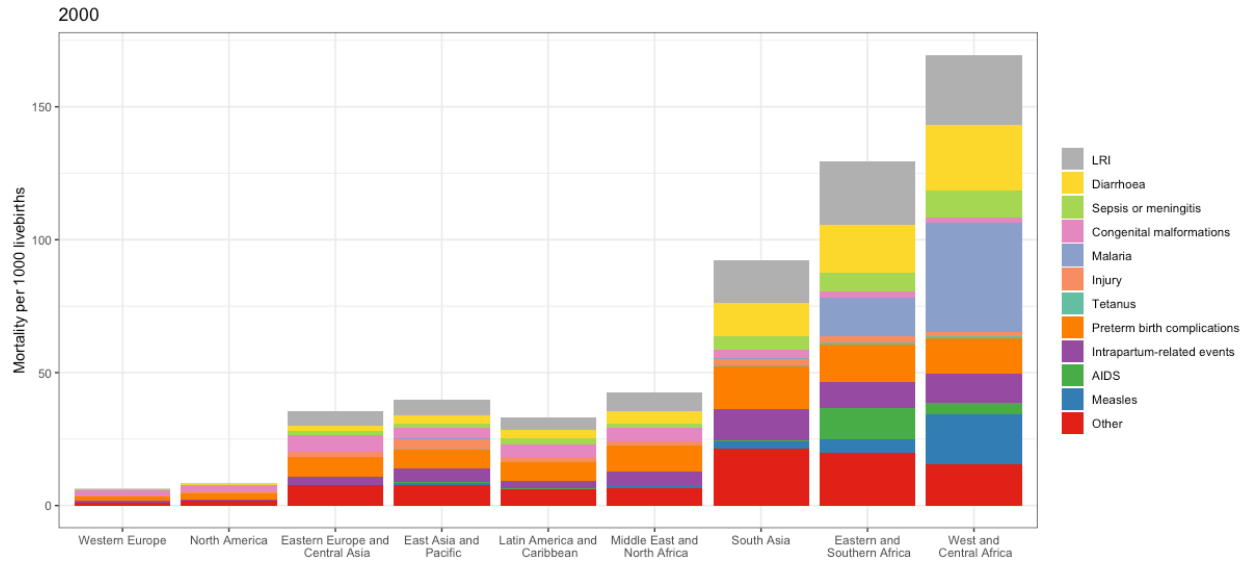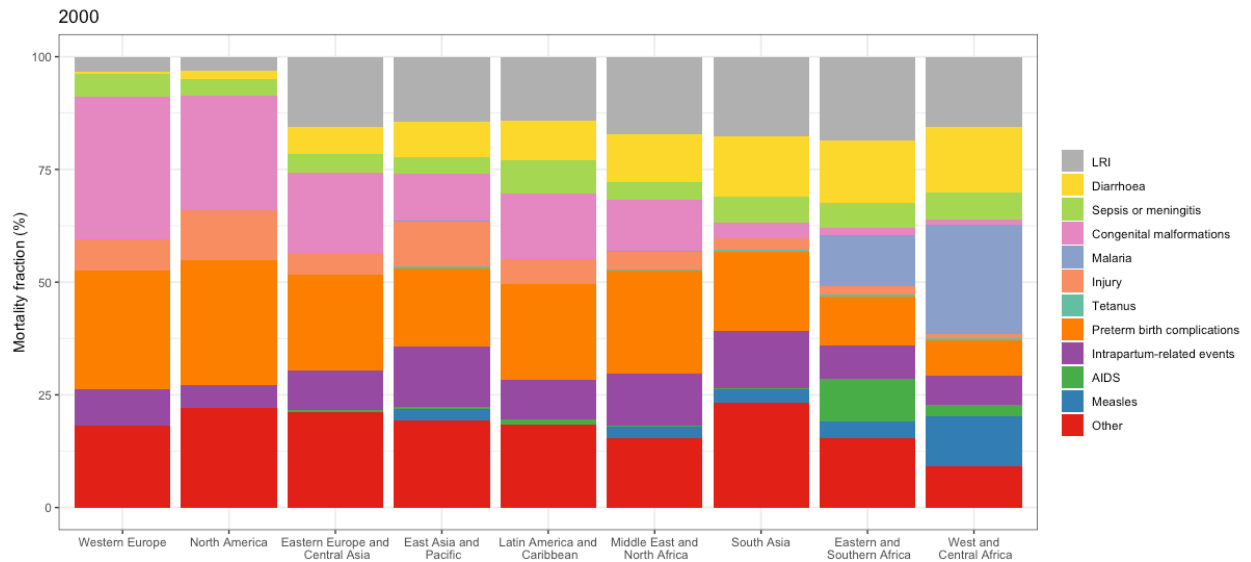





**Appendix 9: Average  
Annual rate of reduction by  
cause in all countries with  
50 or more under-five  
deaths in 2019 for  
2000-2015 and 2015-2019**

### Afghanistan (Under five)

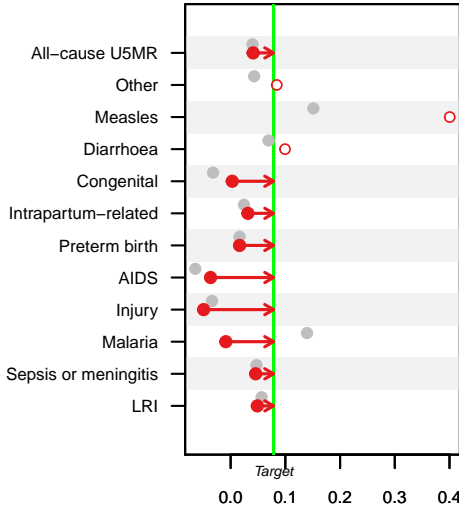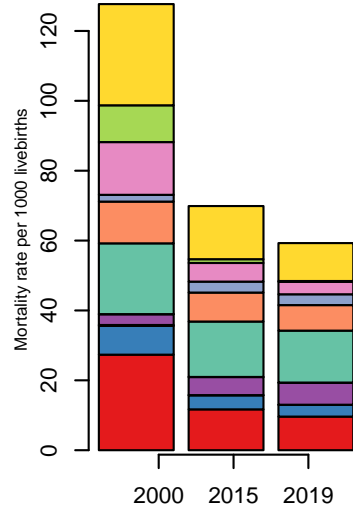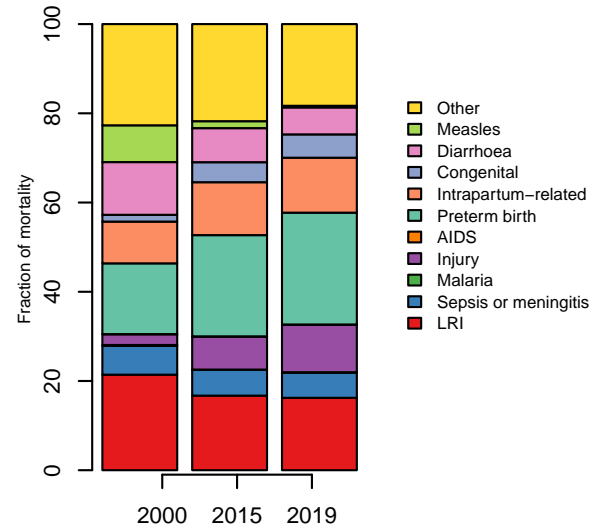

### Afghanistan (Neonatal)

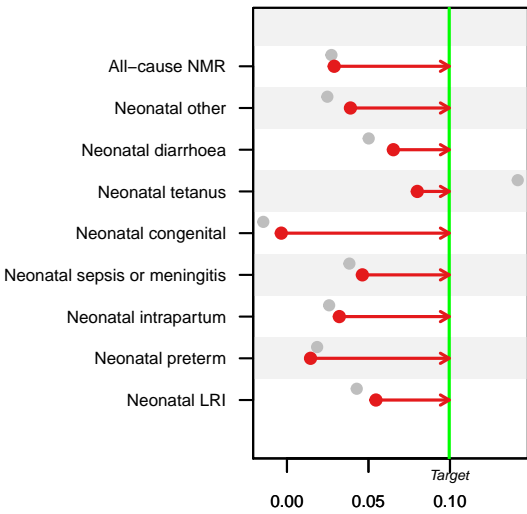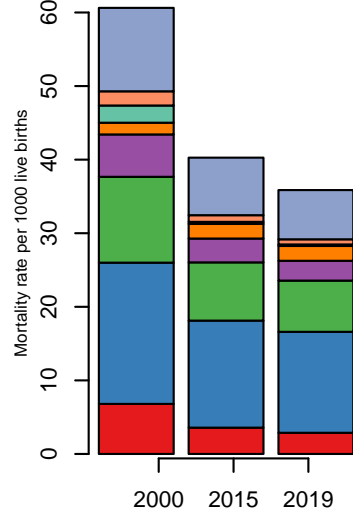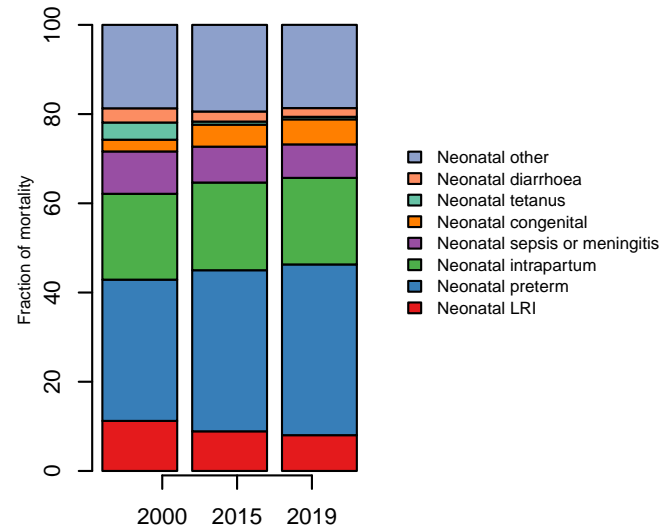

● 2000 – 2015      ● 2015 – 2019 (not on target)      → Deficit to target      ○ 2015 – 2019 (on target)

### Angola (Under five)

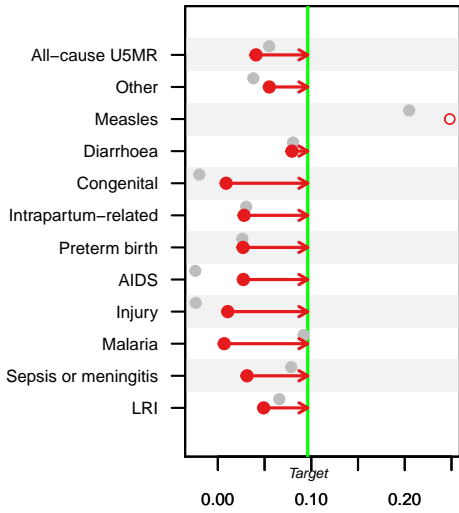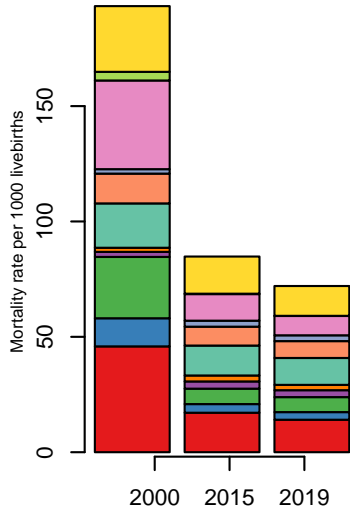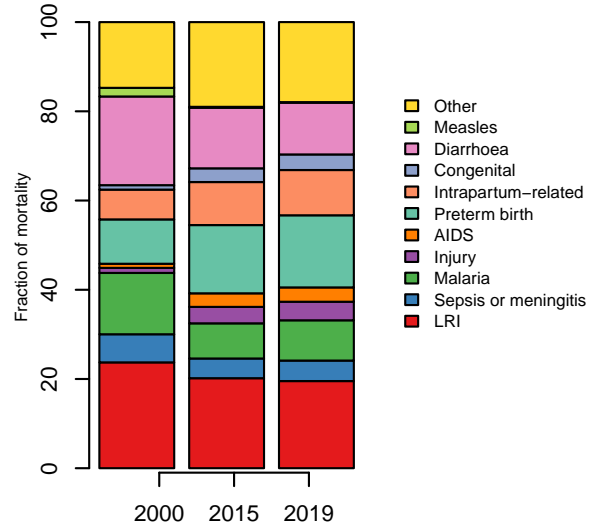

### Angola (Neonatal)

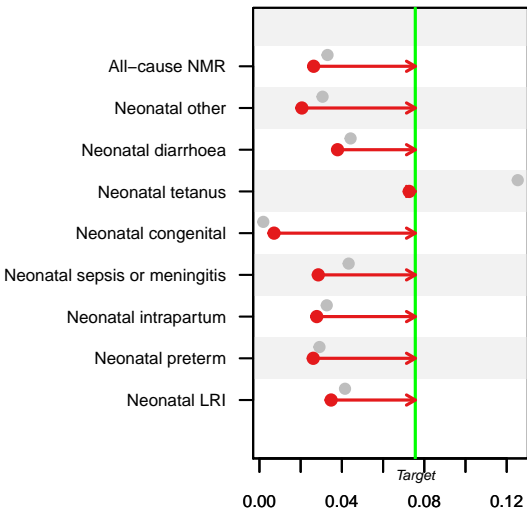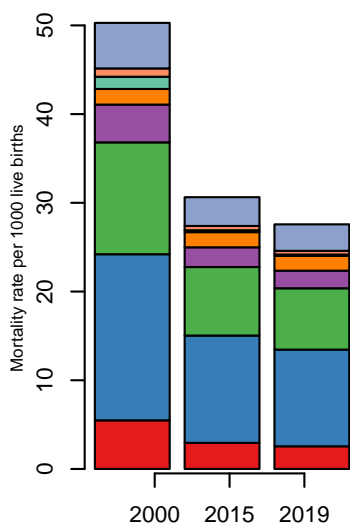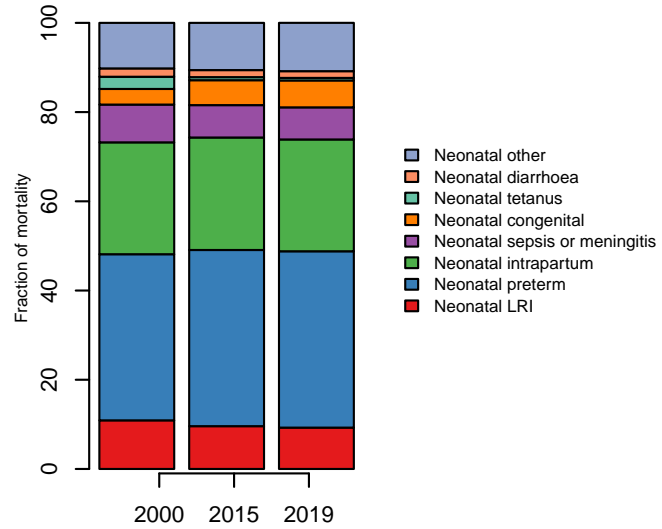

● 2000 – 2015      ● 2015 – 2019 (not on target)      → Deficit to target      ○ 2015 – 2019 (on target)

### Albania (Under five)

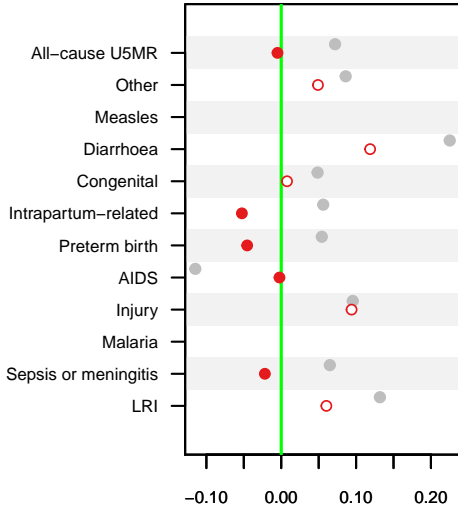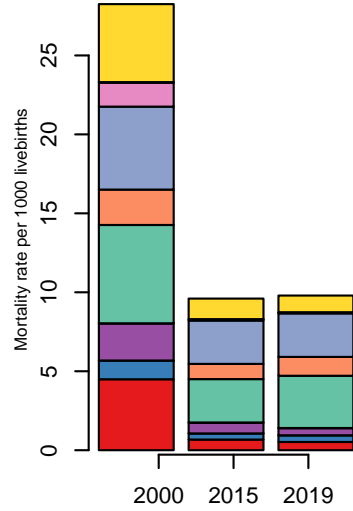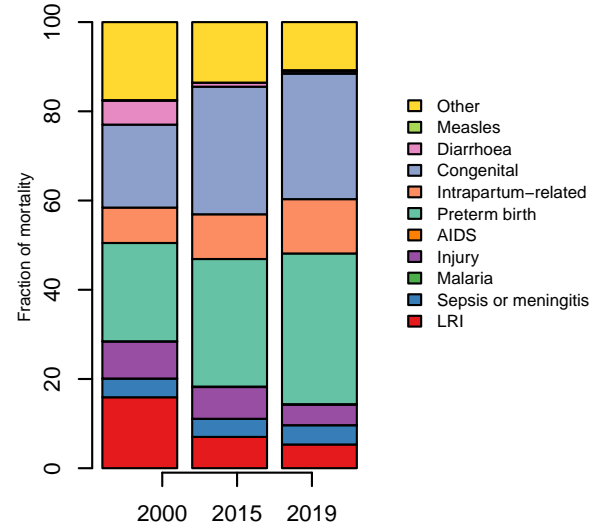

### Albania (Neonatal)

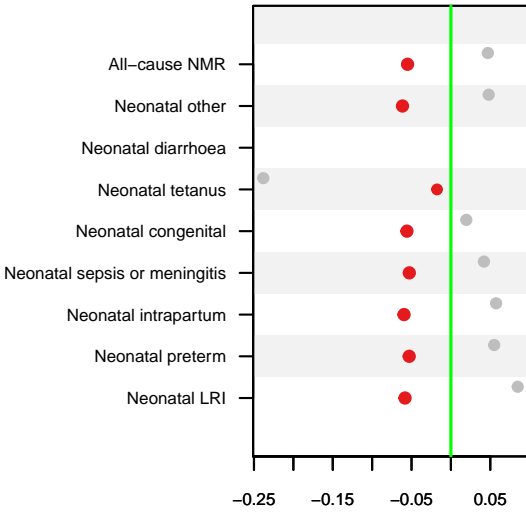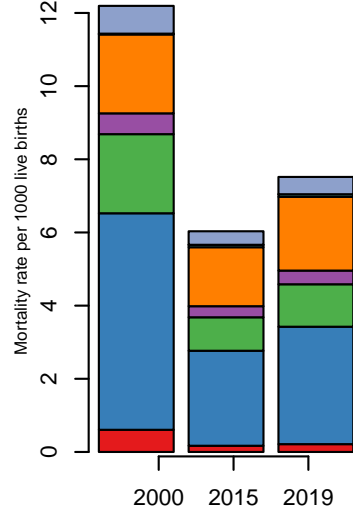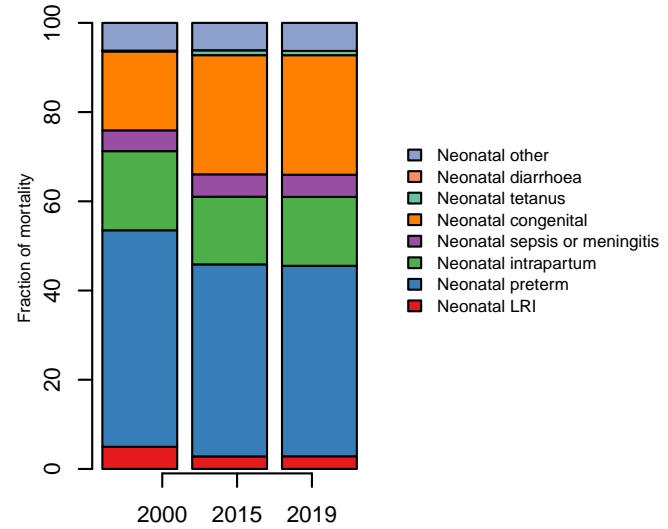

● 2000 – 2015      ● 2015 – 2019 (not on target)      → Deficit to target      ○ 2015 – 2019 (on target)

### United Arab Emirates (Under five)

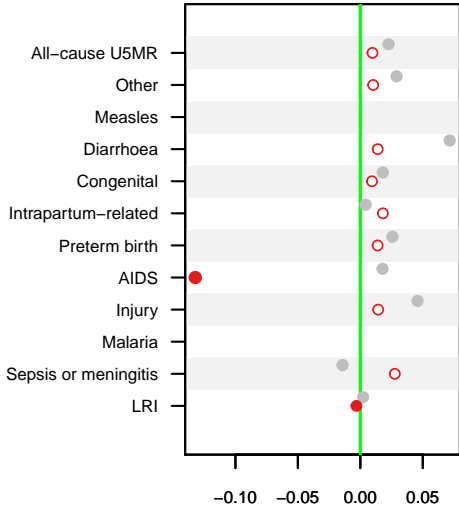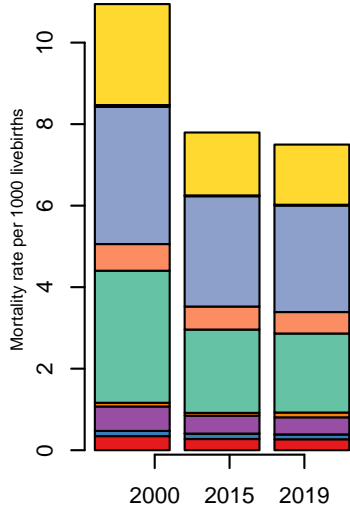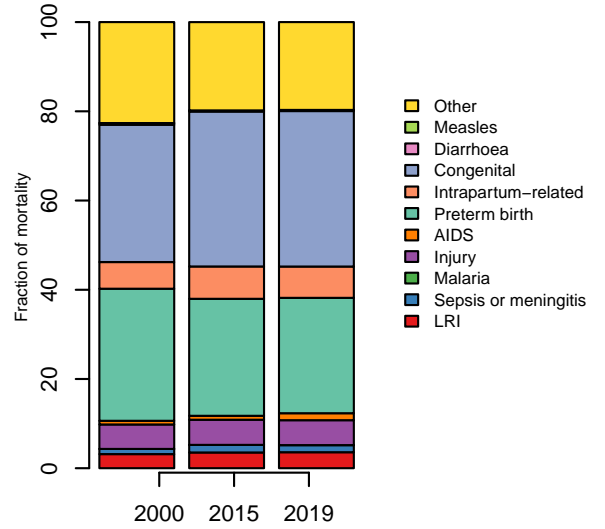

### United Arab Emirates (Neonatal)

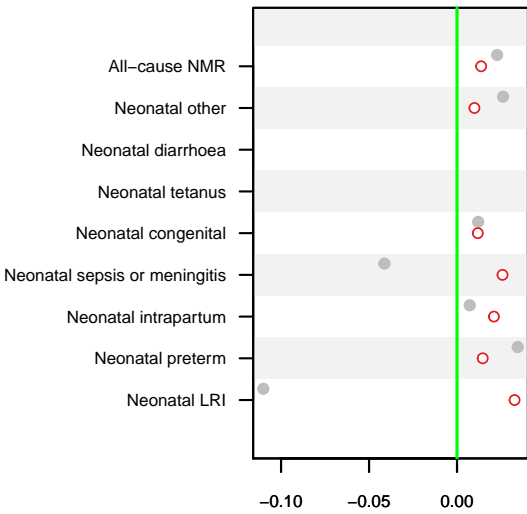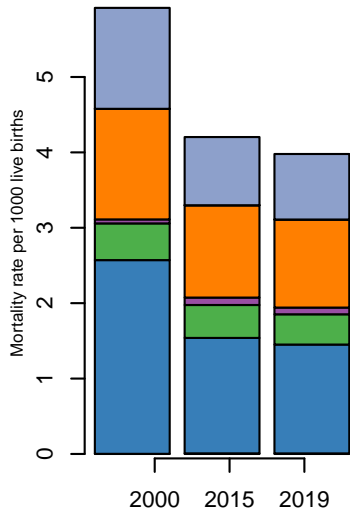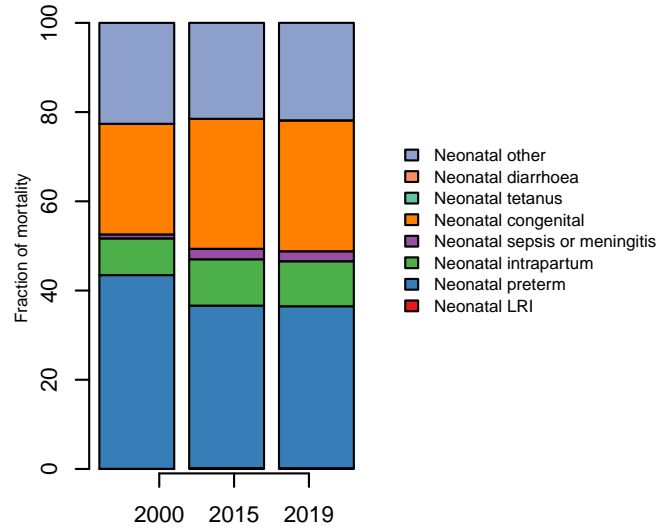

● 2000 – 2015      ● 2015 – 2019 (not on target)      → Deficit to target      ○ 2015 – 2019 (on target)

### Argentina (Under five)

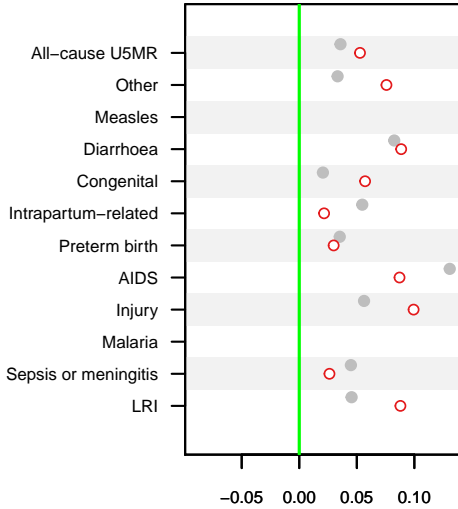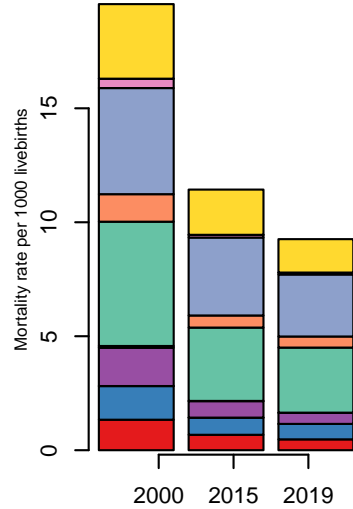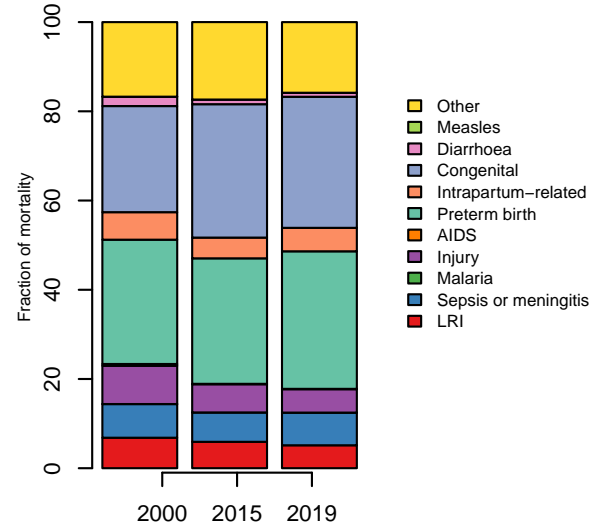

### Argentina (Neonatal)

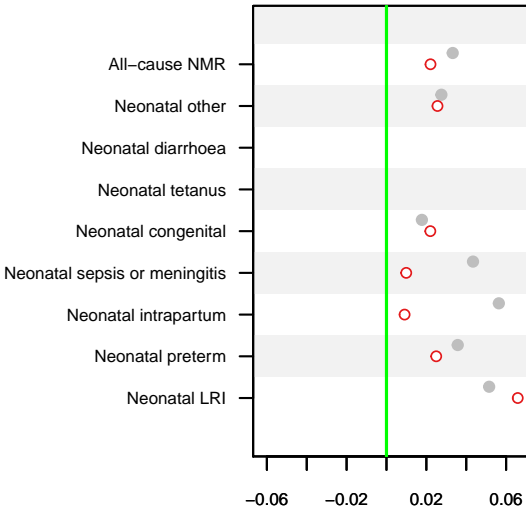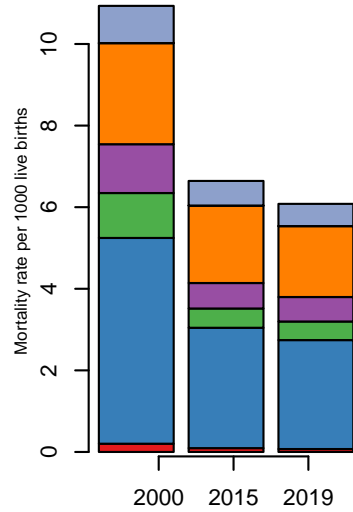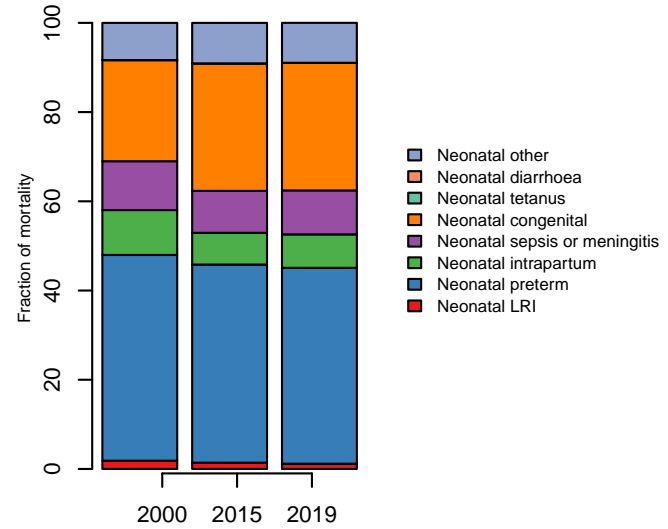

● 2000 – 2015      ● 2015 – 2019 (not on target)      → Deficit to target      ○ 2015 – 2019 (on target)

### Armenia (Under five)

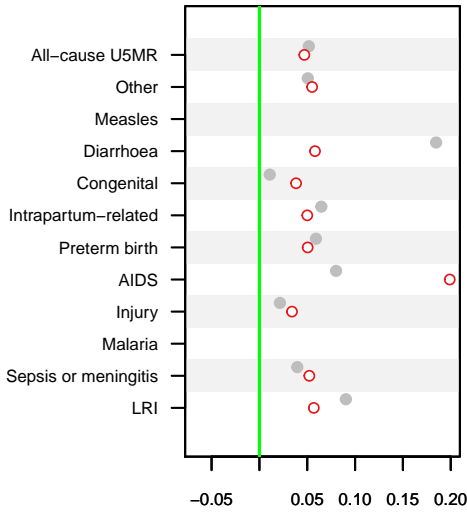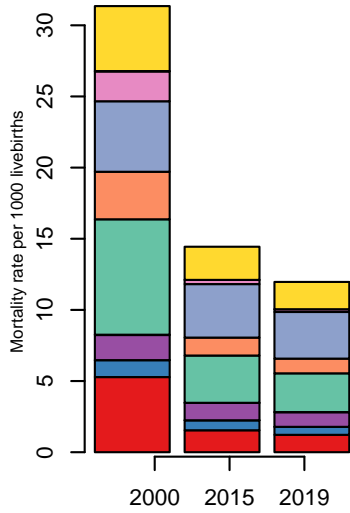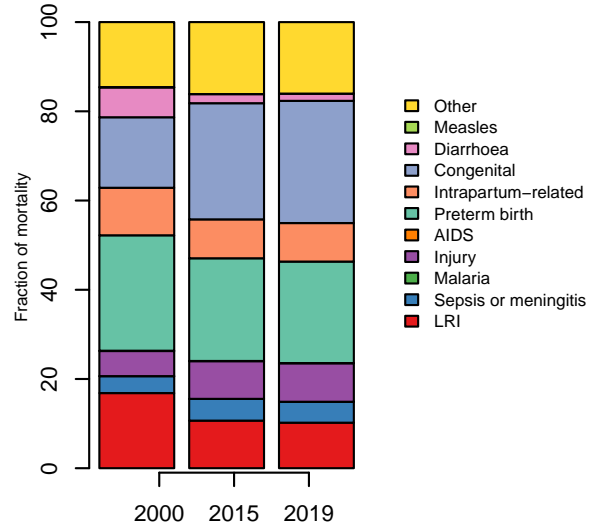

### Armenia (Neonatal)

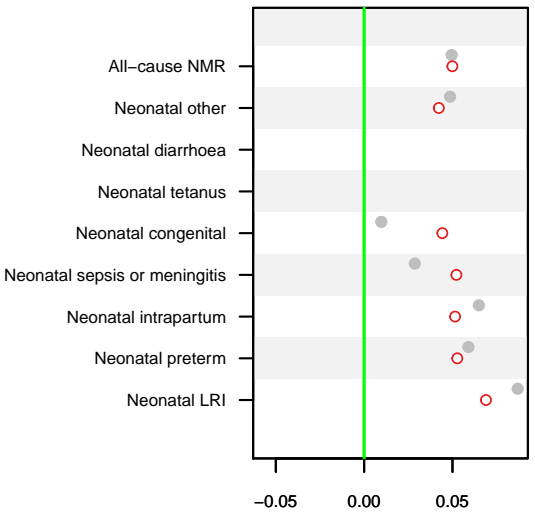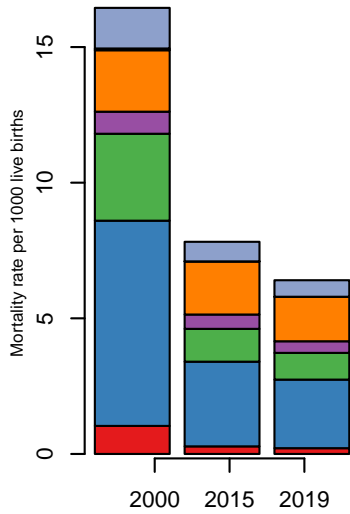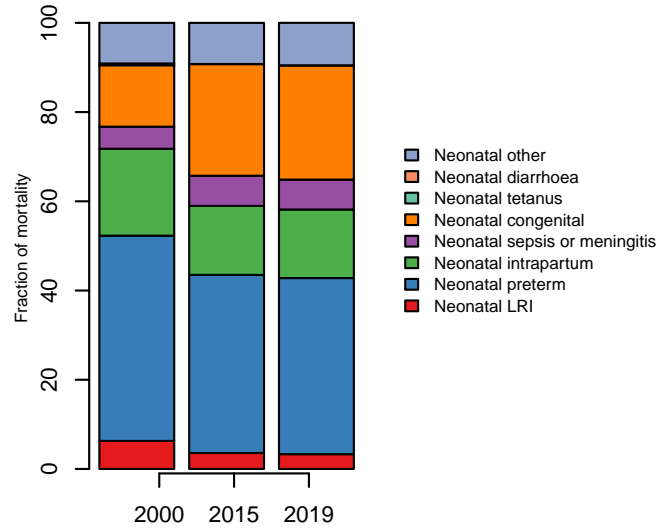

● 2000 – 2015      ● 2015 – 2019 (not on target)      → Deficit to target      ○ 2015 – 2019 (on target)



### Australia (Under five)

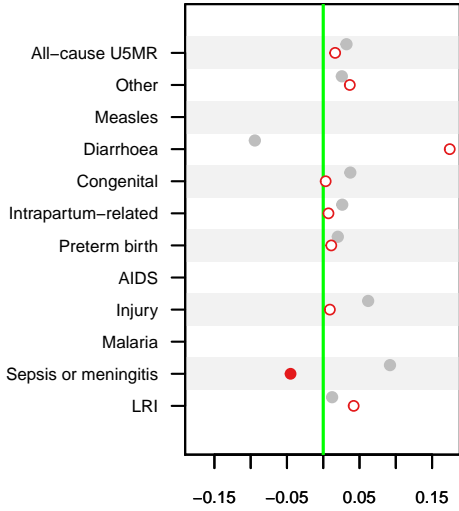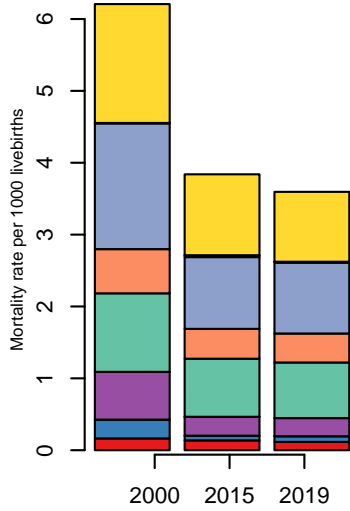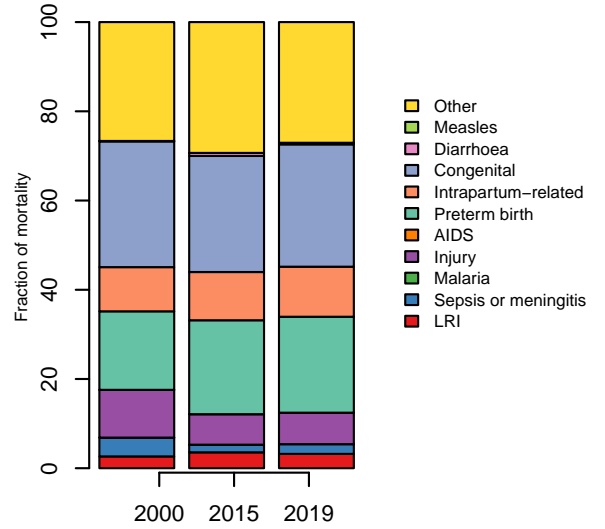

### Australia (Neonatal)

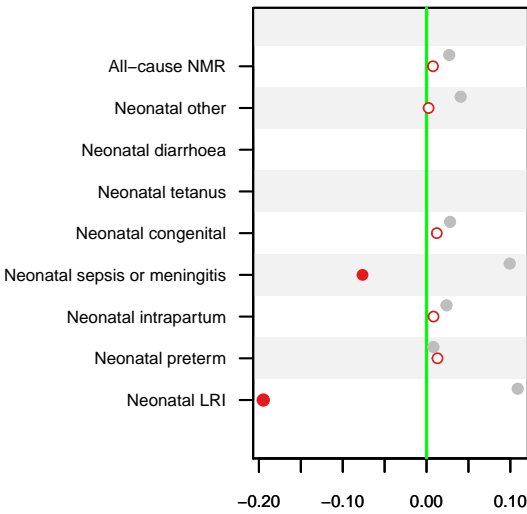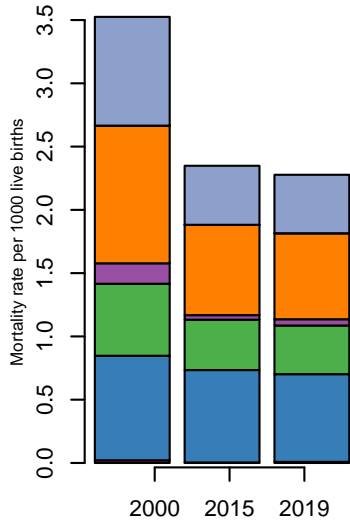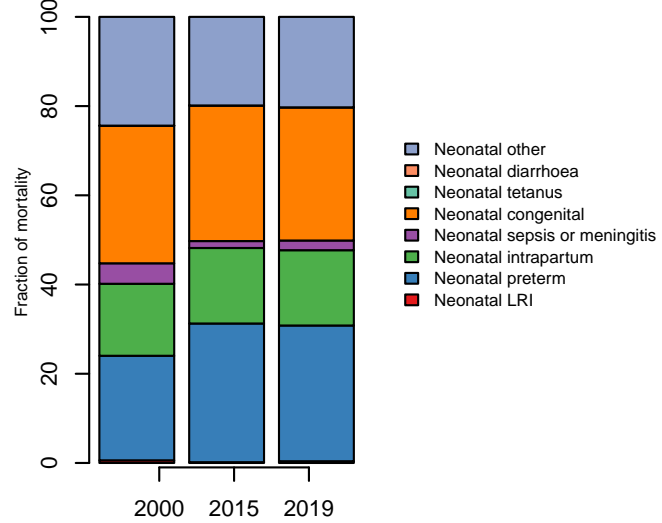

● 2000 – 2015      ● 2015 – 2019 (not on target)      → Deficit to target      ○ 2015 – 2019 (on target)

### Austria (Under five)

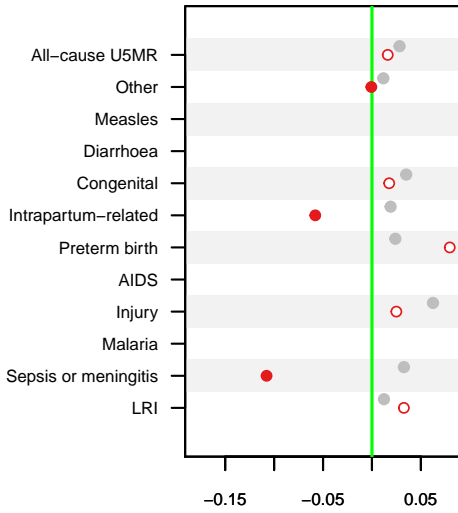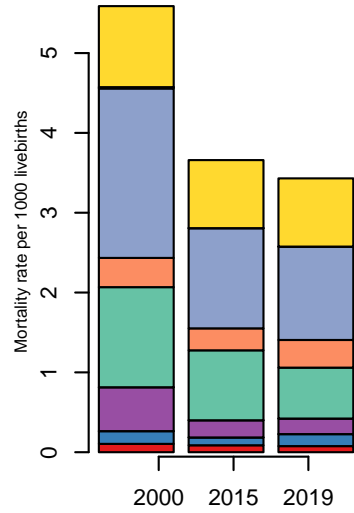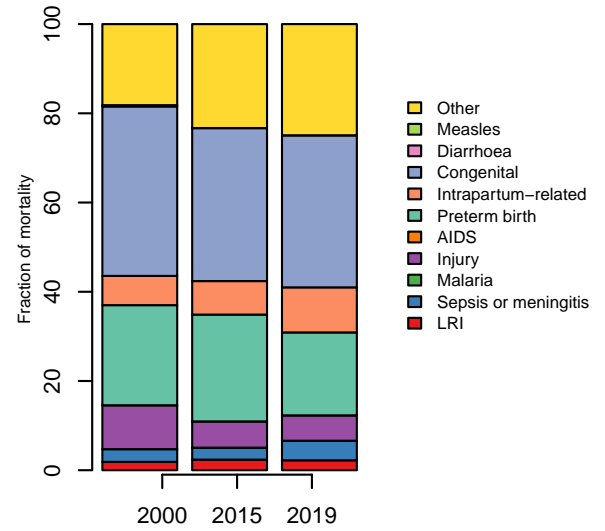

### Austria (Neonatal)

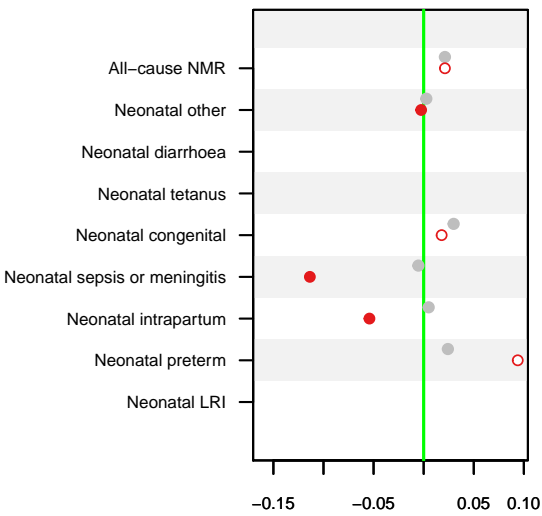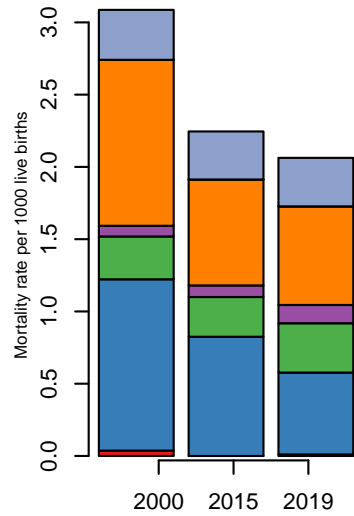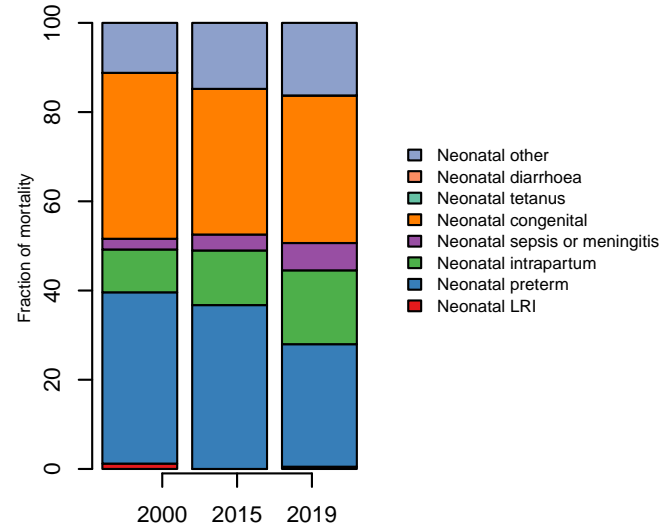

● 2000 – 2015      ● 2015 – 2019 (not on target)      → Deficit to target      ○ 2015 – 2019 (on target)

### Azerbaijan (Under five)

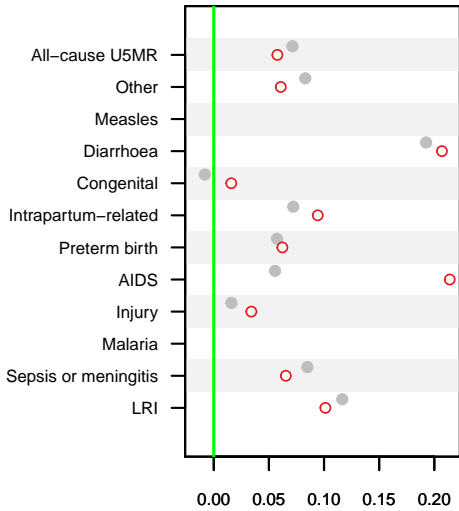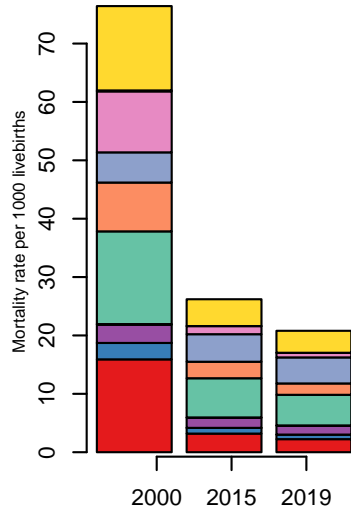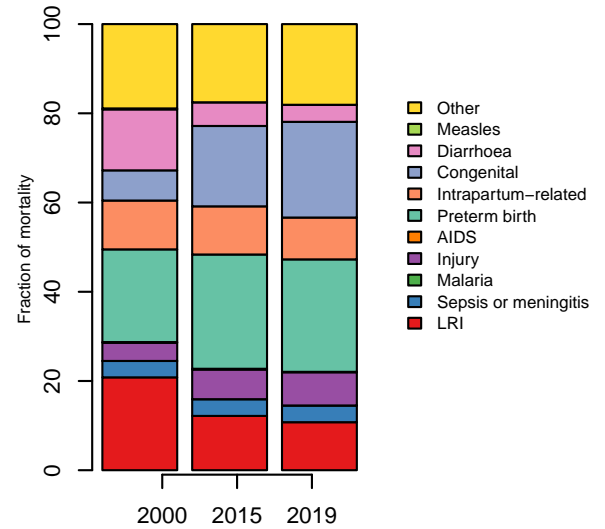

### Azerbaijan (Neonatal)

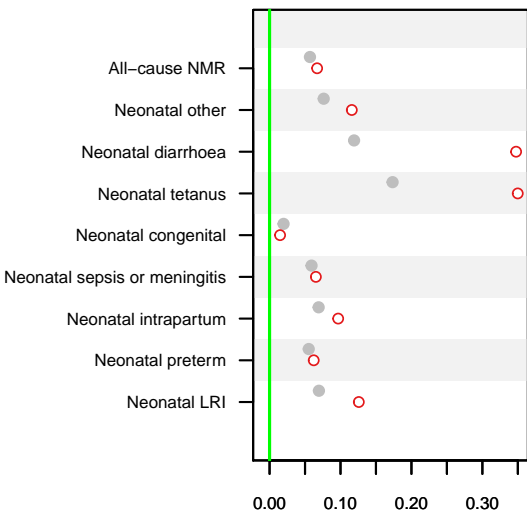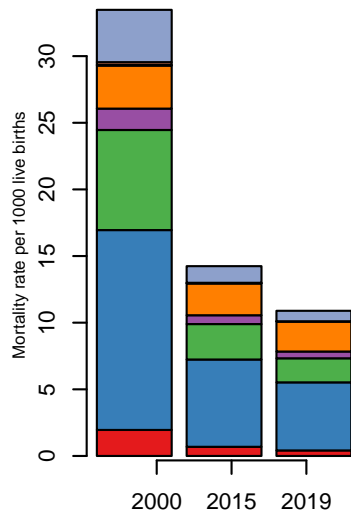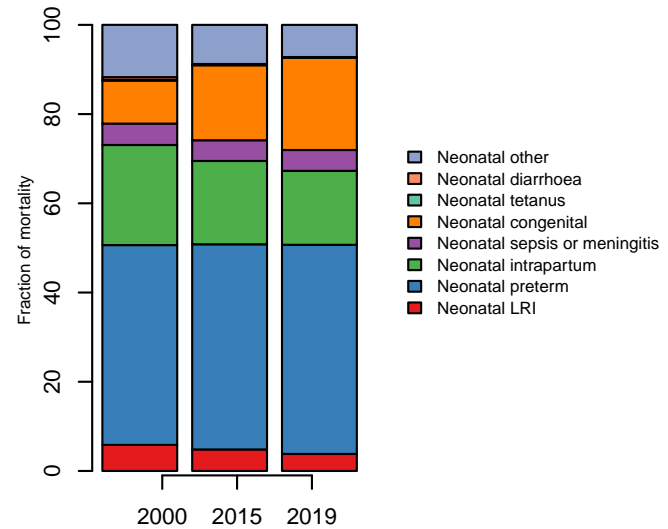

● 2000 – 2015      ● 2015 – 2019 (not on target)      → Deficit to target      ○ 2015 – 2019 (on target)

### Burundi (Under five)

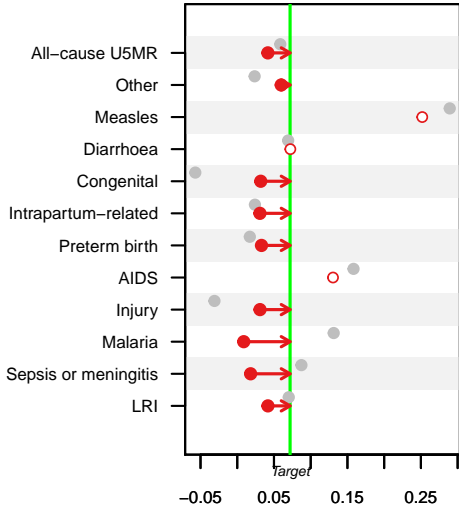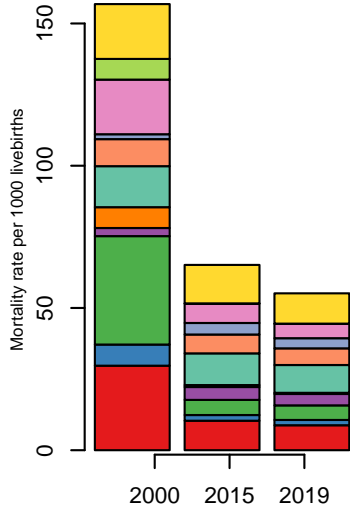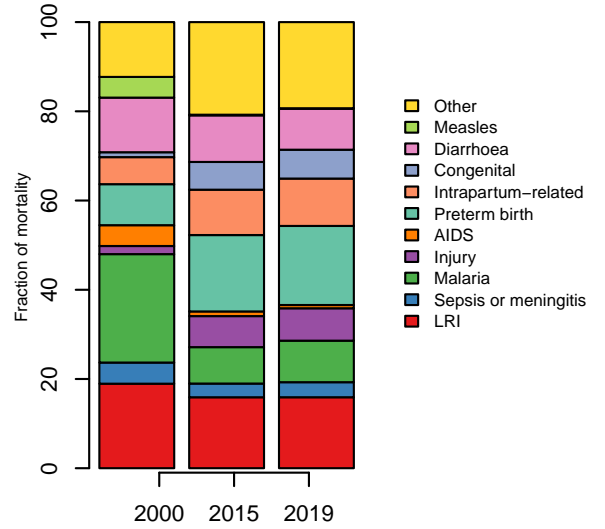

### Burundi (Neonatal)

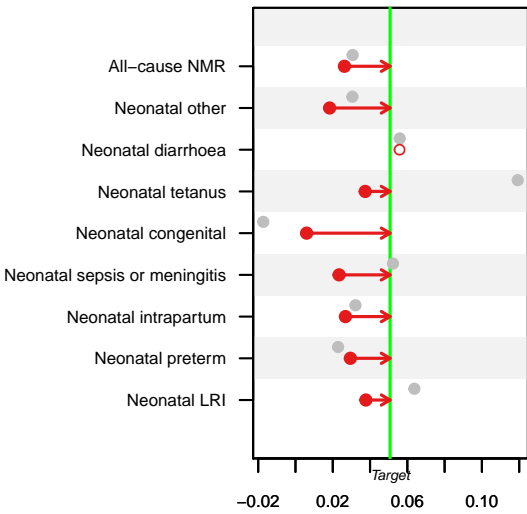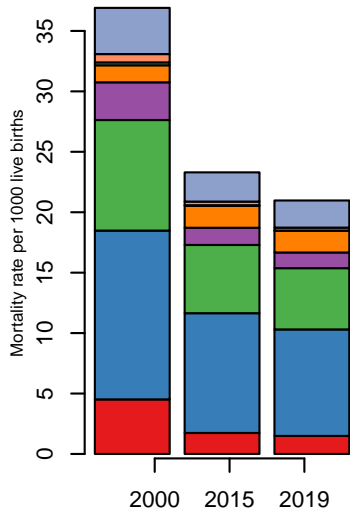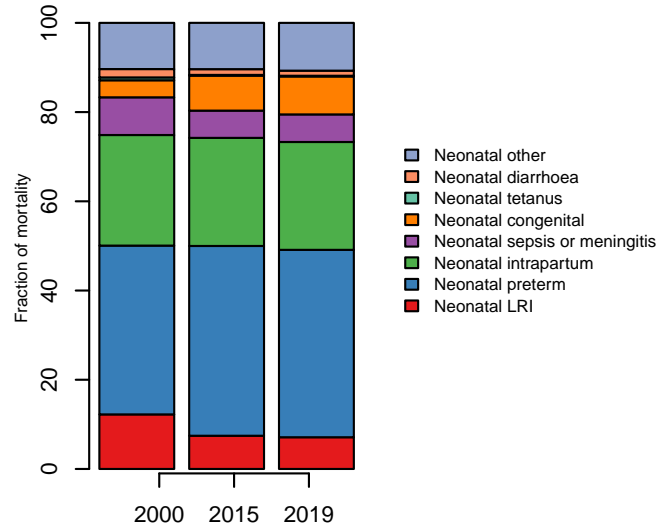

● 2000 – 2015      ● 2015 – 2019 (not on target)      → Deficit to target      ○ 2015 – 2019 (on target)

### Belgium (Under five)

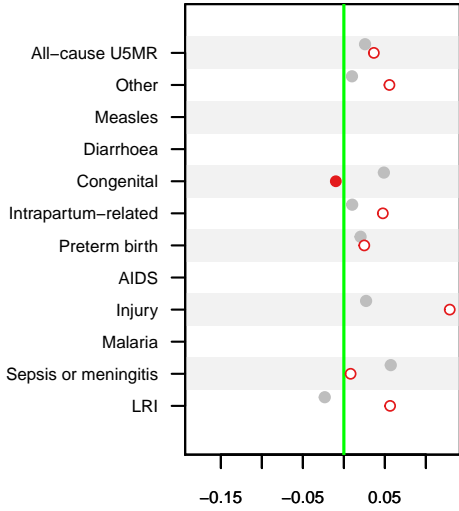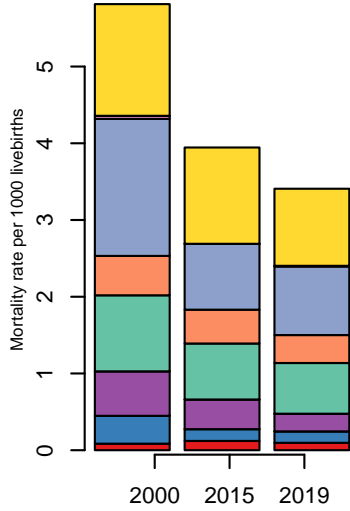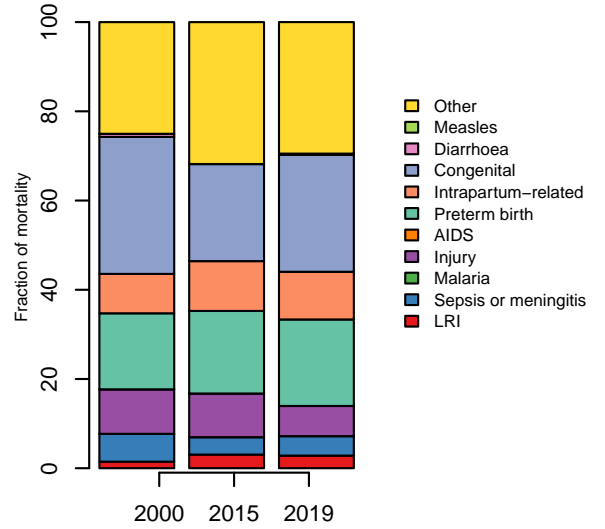

### Belgium (Neonatal)

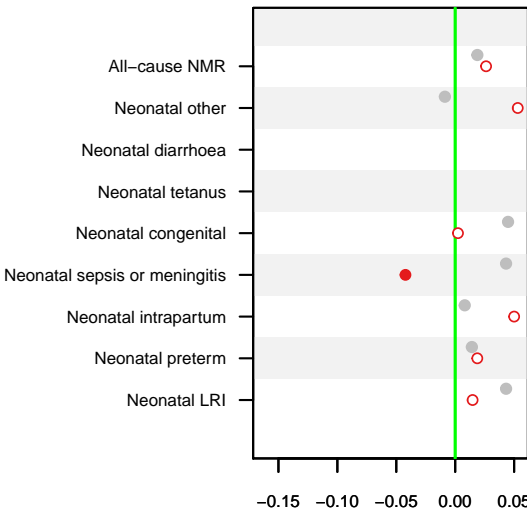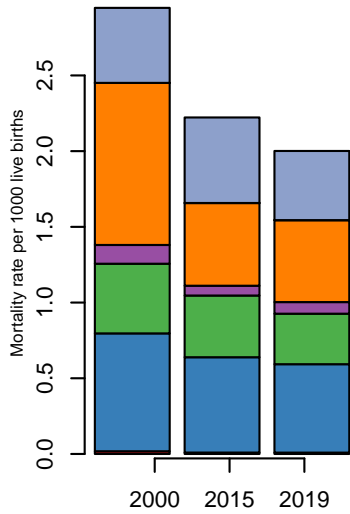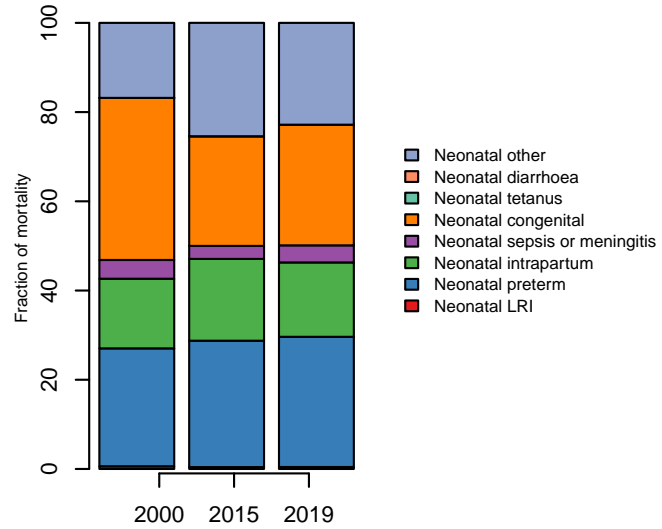

● 2000 – 2015      ● 2015 – 2019 (not on target)      → Deficit to target      ○ 2015 – 2019 (on target)

### Benin (Under five)

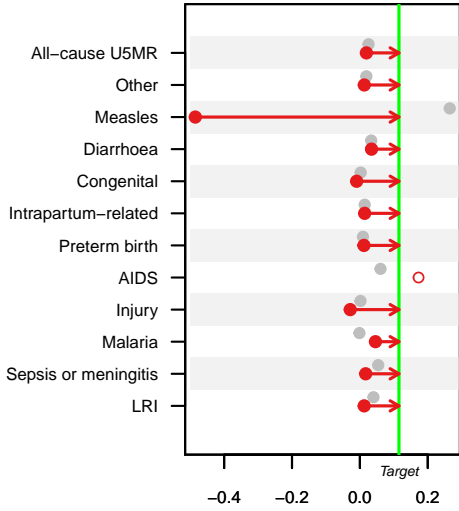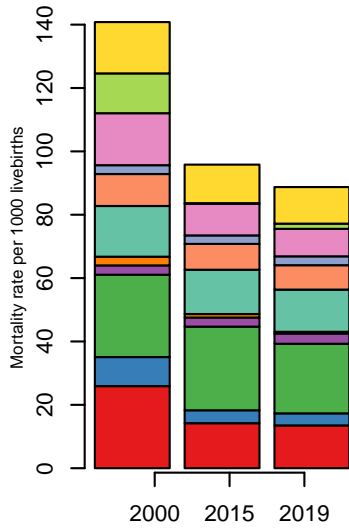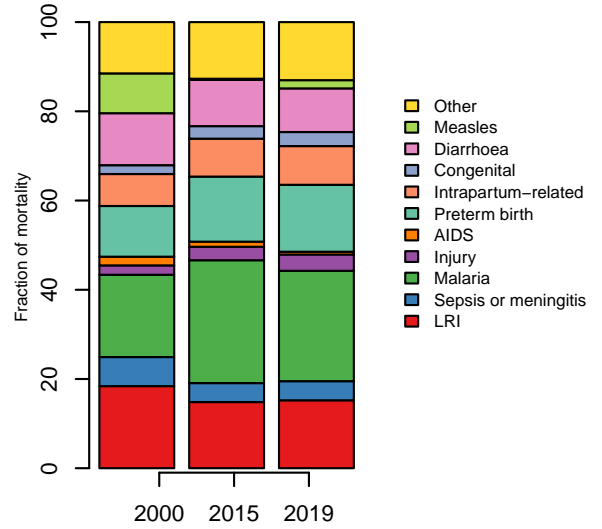

- Other
- Measles
- Diarrhoea
- Congenital
- Intrapartum-related
- Preterm birth
- AIDS
- Injury
- Malaria
- Sepsis or meningitis
- LRI

### Benin (Neonatal)

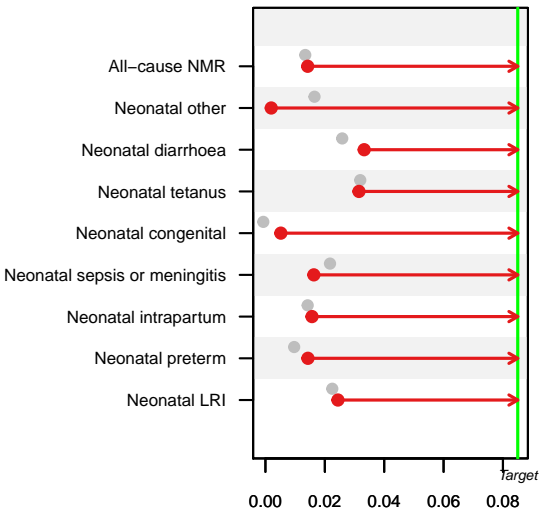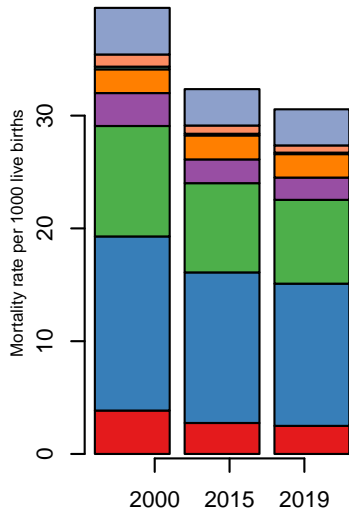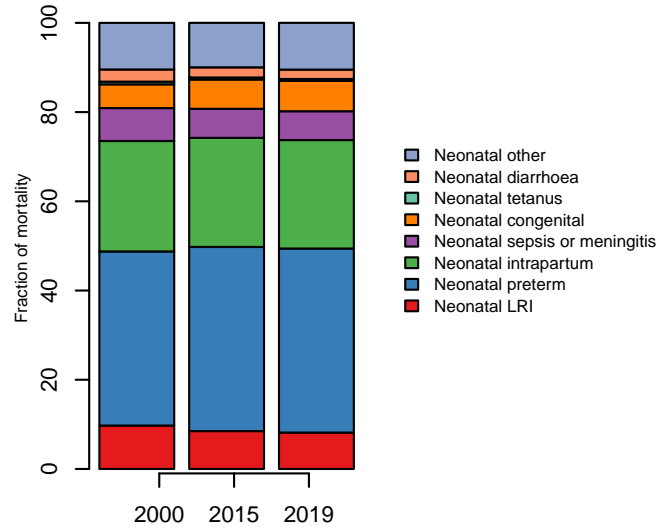

- Neonatal other
- Neonatal diarrhoea
- Neonatal tetanus
- Neonatal congenital
- Neonatal sepsis or meningitis
- Neonatal intrapartum
- Neonatal preterm
- Neonatal LRI

● 2000 – 2015      ● 2015 – 2019 (not on target)      → Deficit to target      ○ 2015 – 2019 (on target)

### Burkina Faso (Under five)

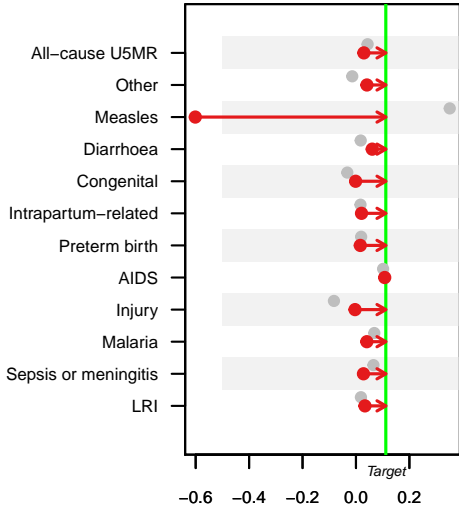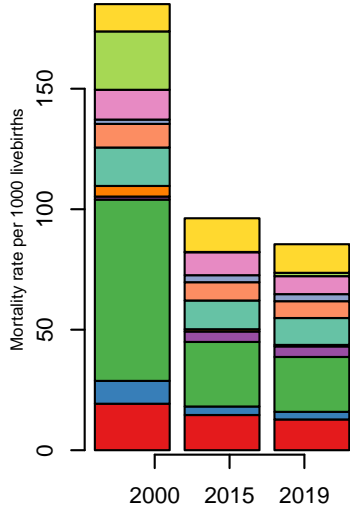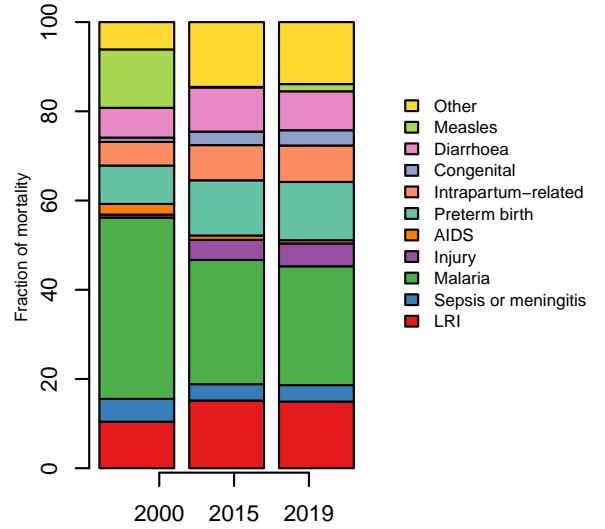

### Burkina Faso (Neonatal)

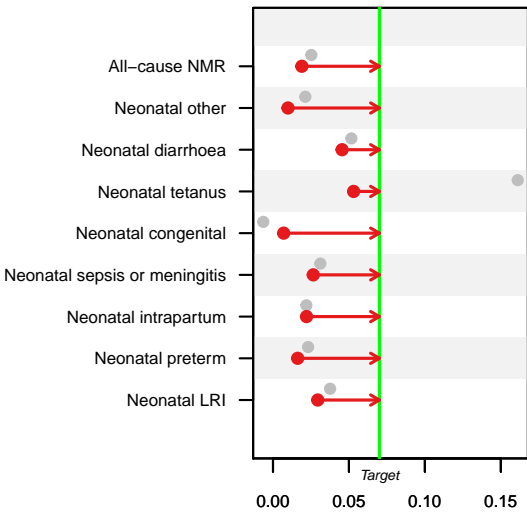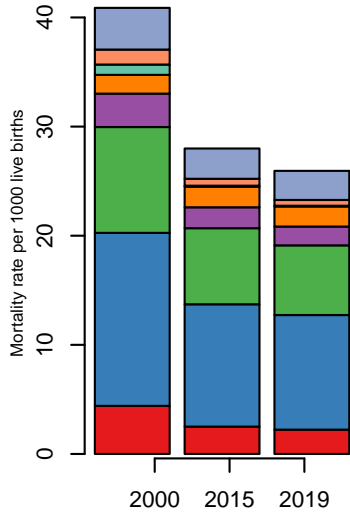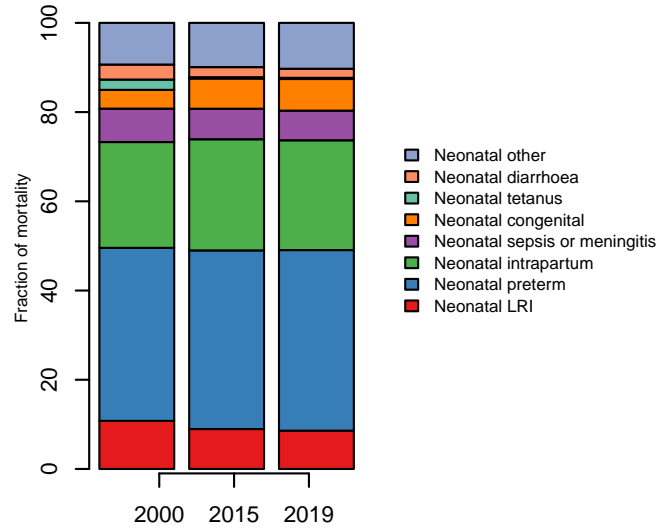

● 2000 – 2015      ● 2015 – 2019 (not on target)      → Deficit to target      ○ 2015 – 2019 (on target)

### Bangladesh (Under five)

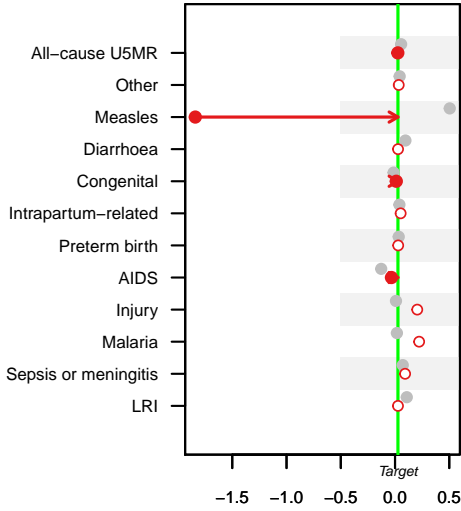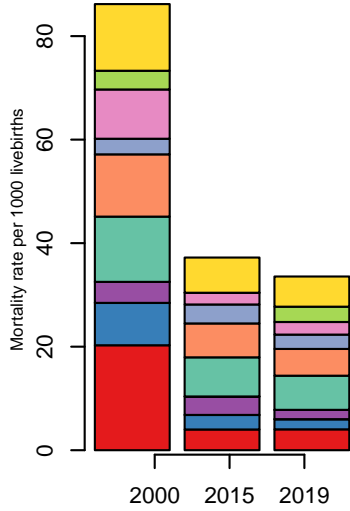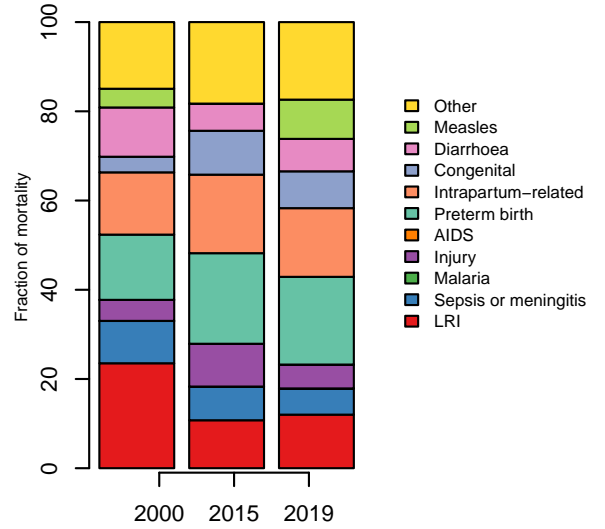

### Bangladesh (Neonatal)

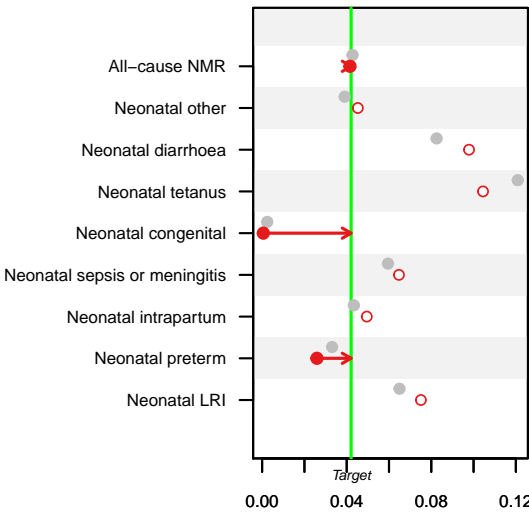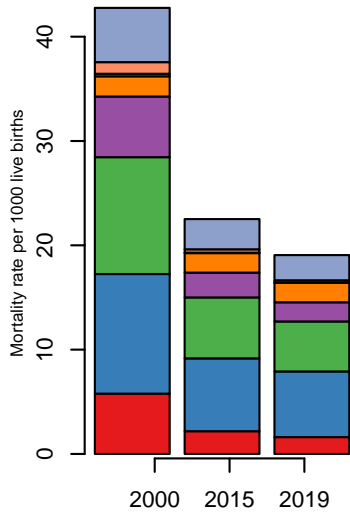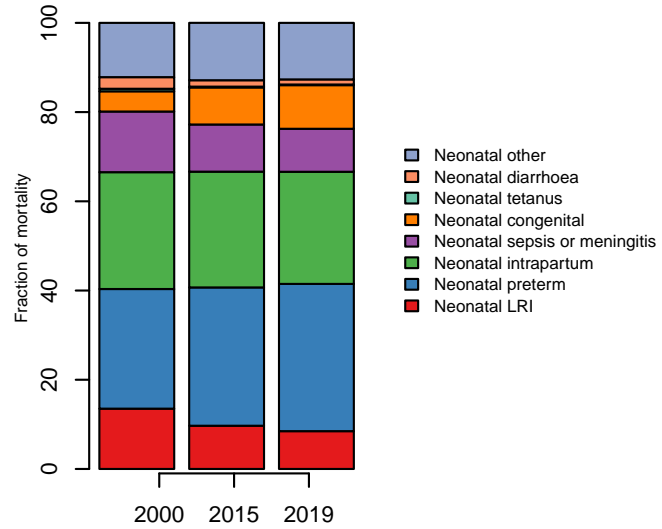

● 2000 – 2015      ● 2015 – 2019 (not on target)      → Deficit to target      ○ 2015 – 2019 (on target)



### Bulgaria (Under five)

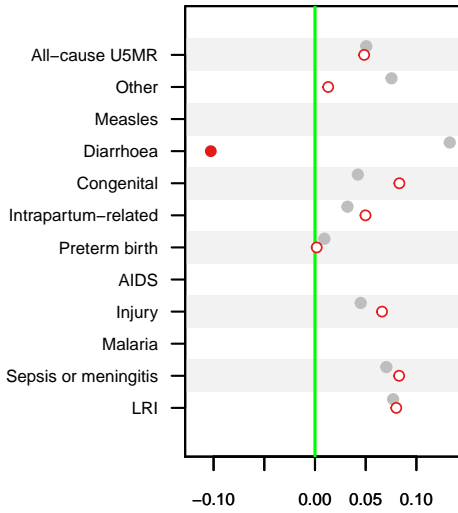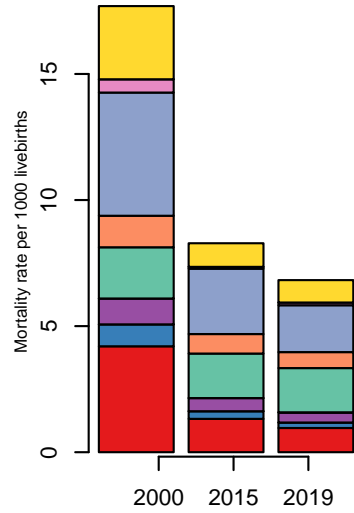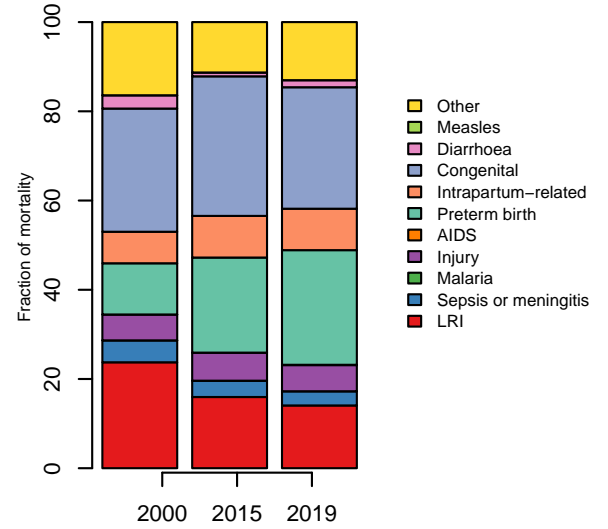

### Bulgaria (Neonatal)

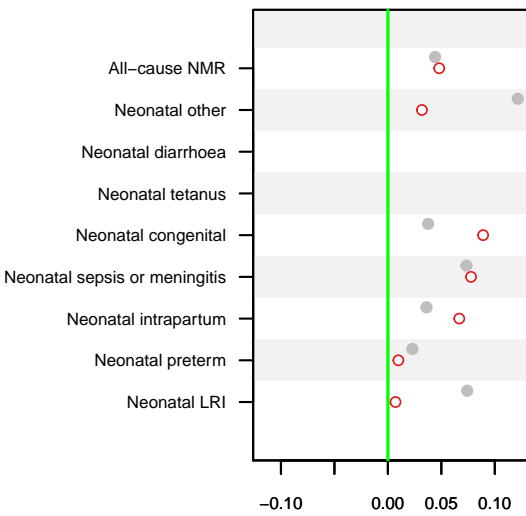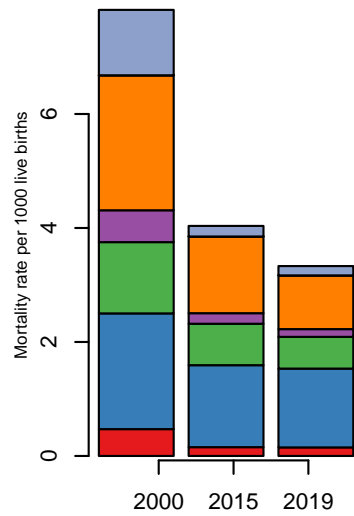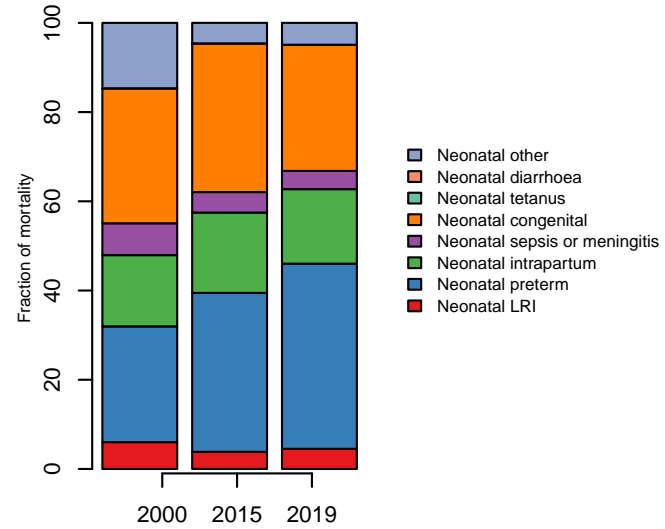

● 2000 – 2015      ● 2015 – 2019 (not on target)      → Deficit to target      ○ 2015 – 2019 (on target)

### Bahrain (Under five)

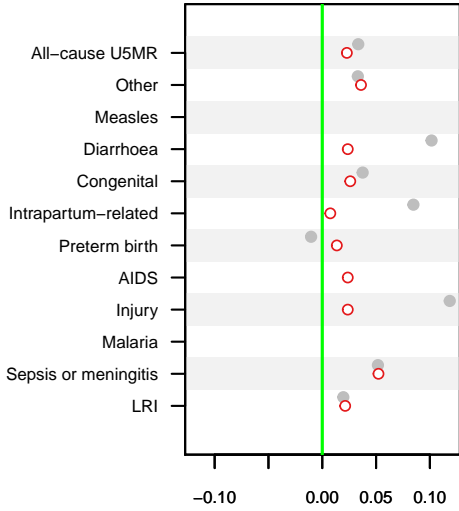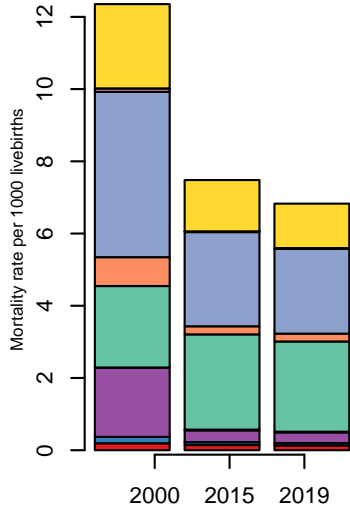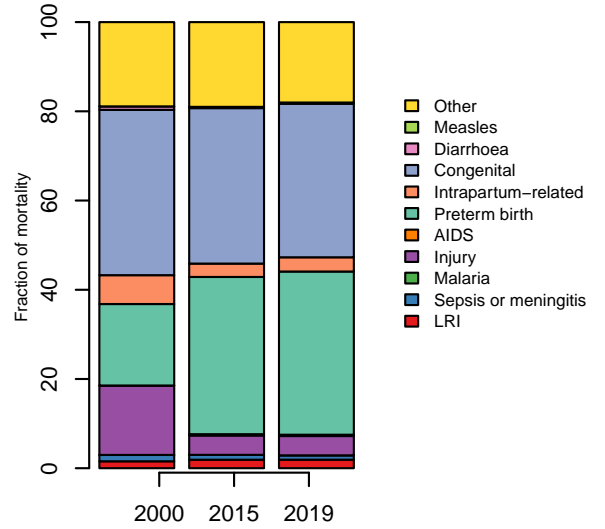

### Bahrain (Neonatal)

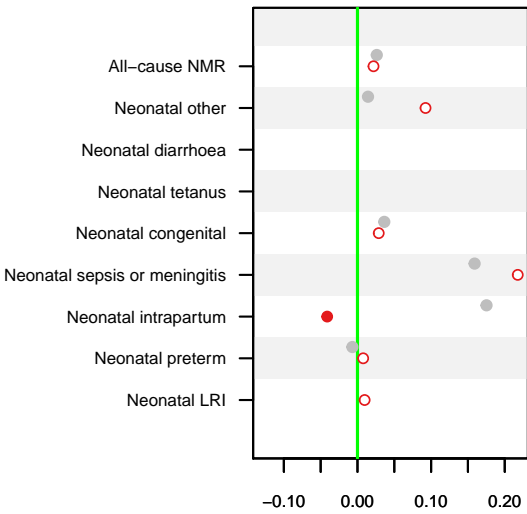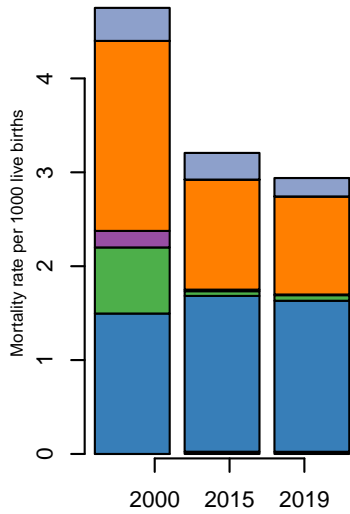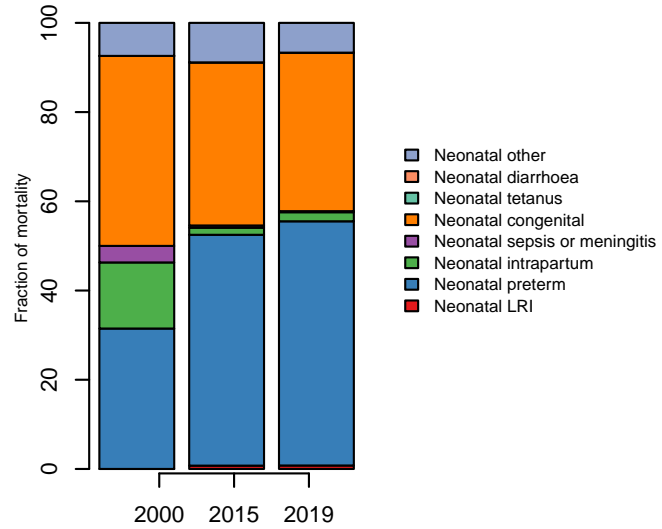

● 2000 – 2015      ● 2015 – 2019 (not on target)      → Deficit to target      ○ 2015 – 2019 (on target)

### Bahamas (Under five)

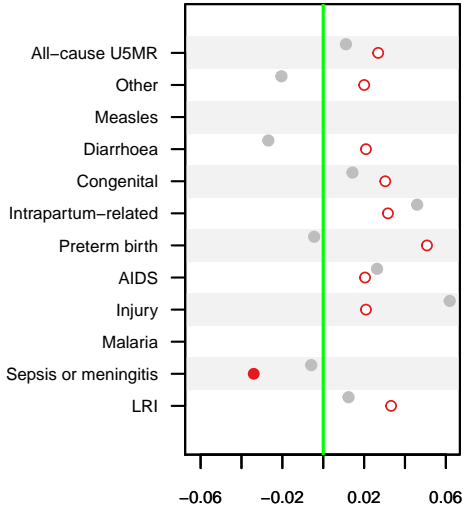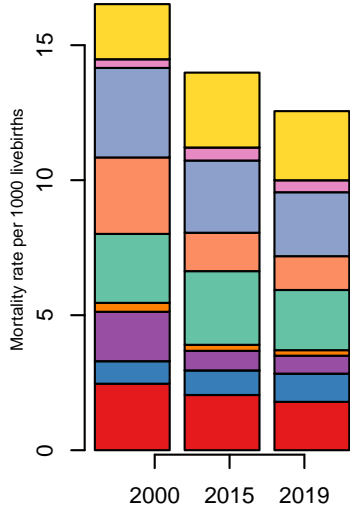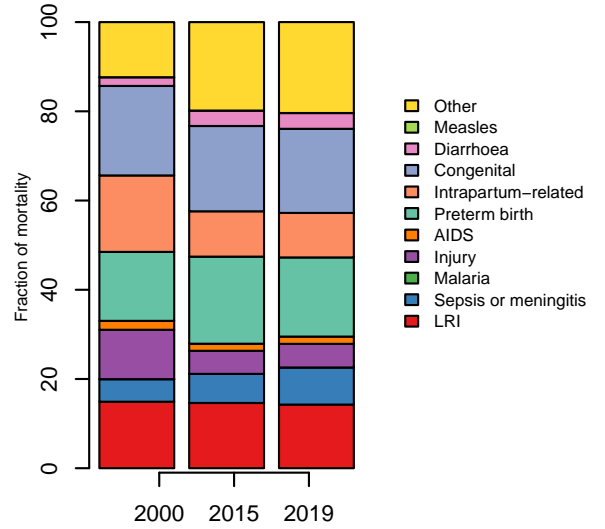

### Bahamas (Neonatal)

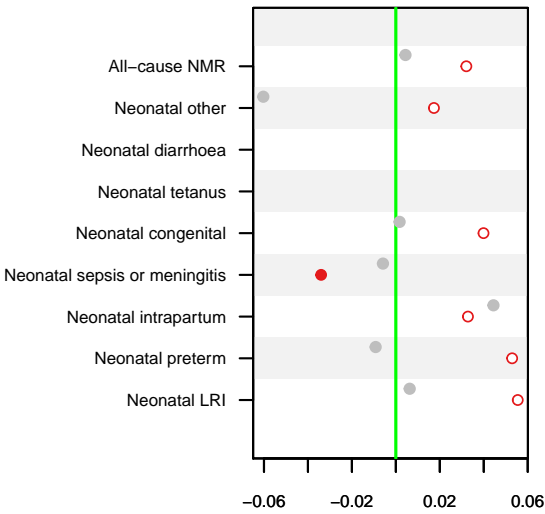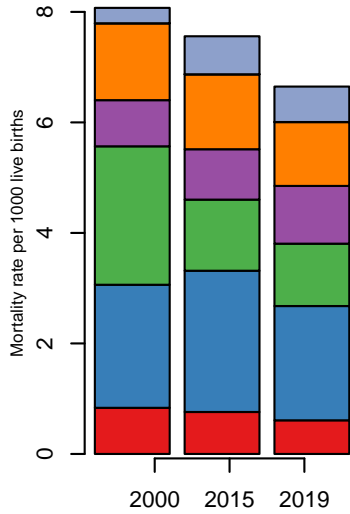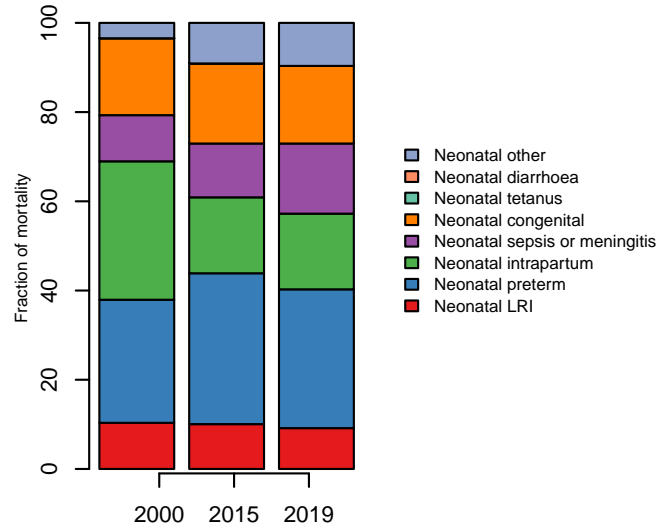

● 2000 – 2015      ● 2015 – 2019 (not on target)      → Deficit to target      ○ 2015 – 2019 (on target)

### Bosnia and Herzegovina (Under five)

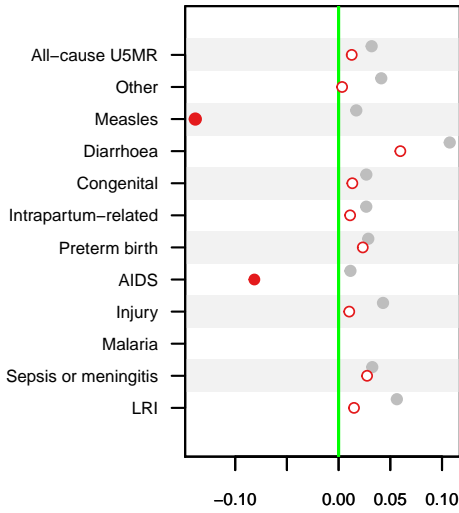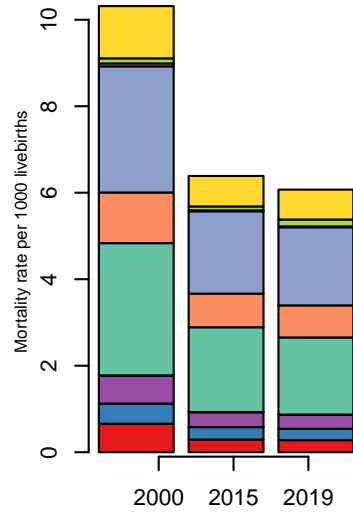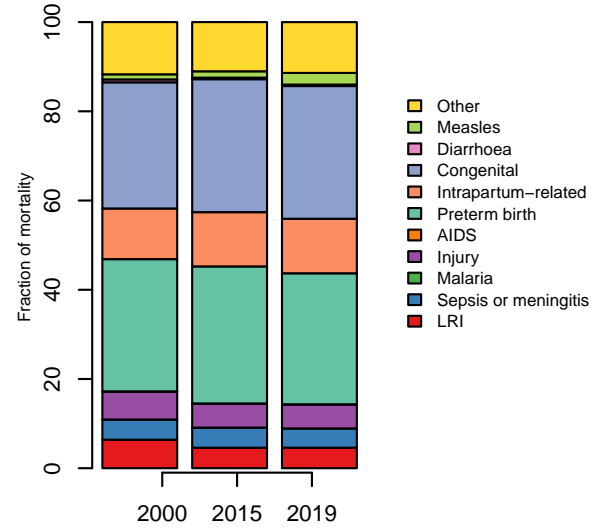

### Bosnia and Herzegovina (Neonatal)

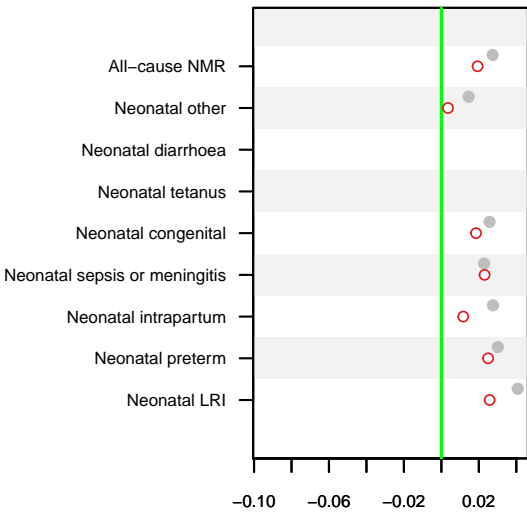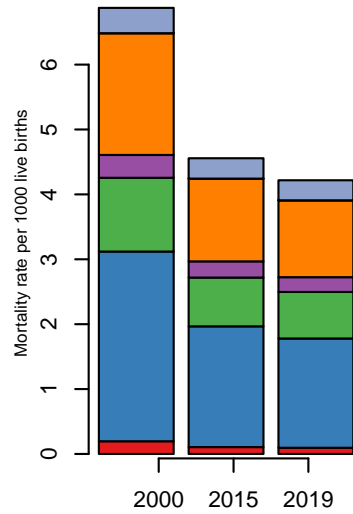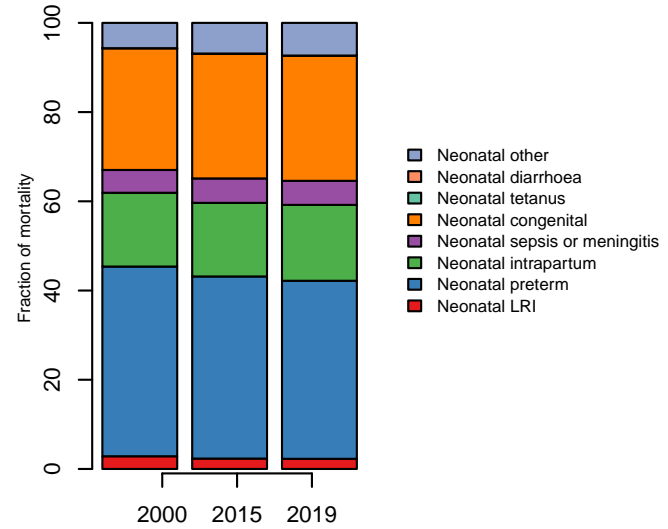

● 2000 – 2015      ● 2015 – 2019 (not on target)      → Deficit to target      ○ 2015 – 2019 (on target)

### Belarus (Under five)

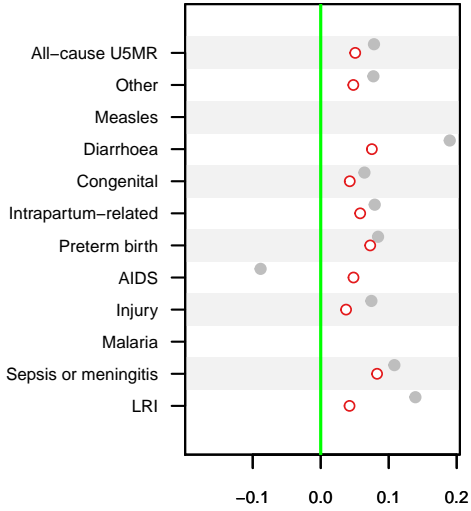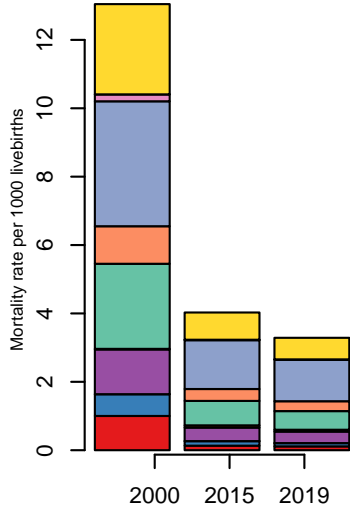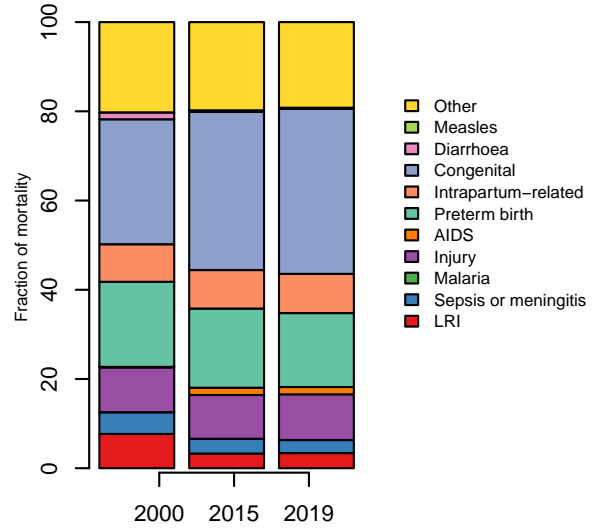

### Belarus (Neonatal)

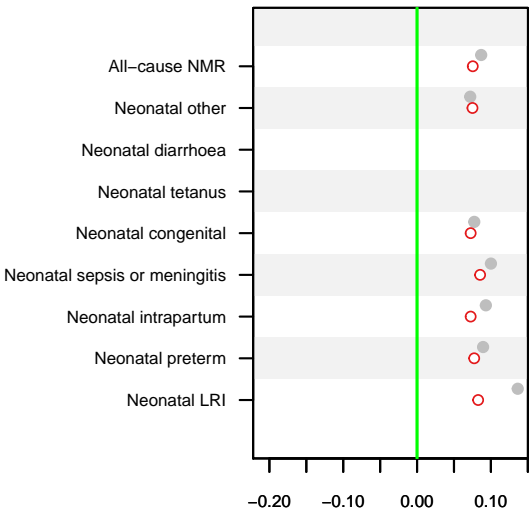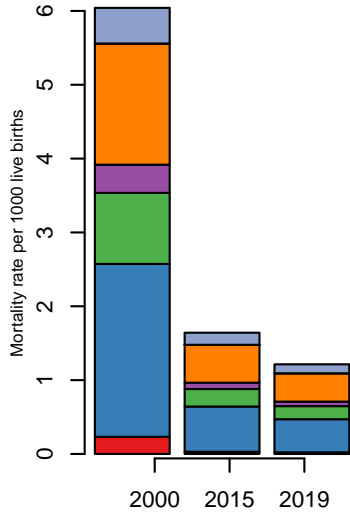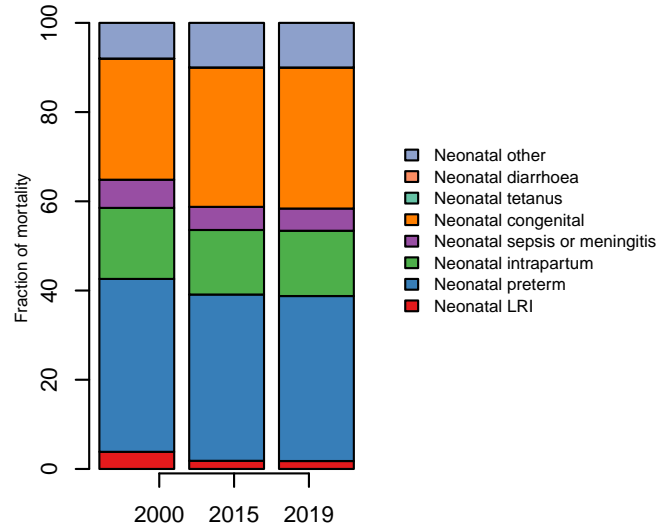

● 2000 – 2015      ● 2015 – 2019 (not on target)      → Deficit to target      ○ 2015 – 2019 (on target)

### Belize (Under five)

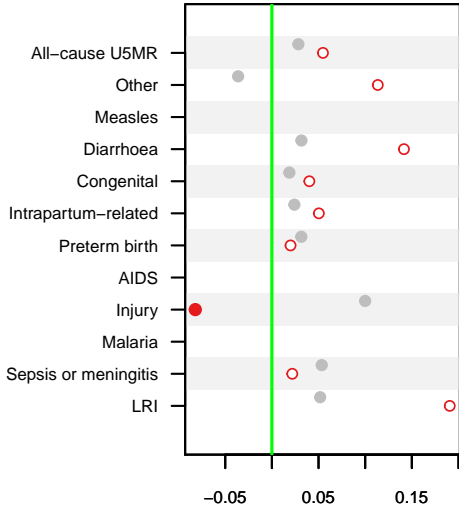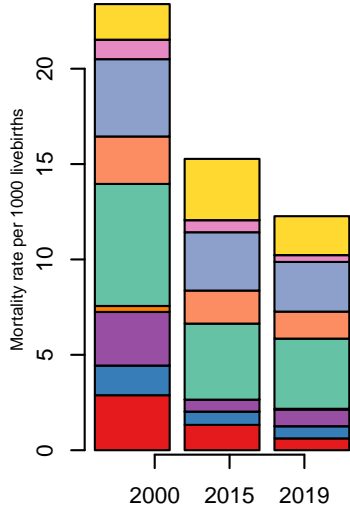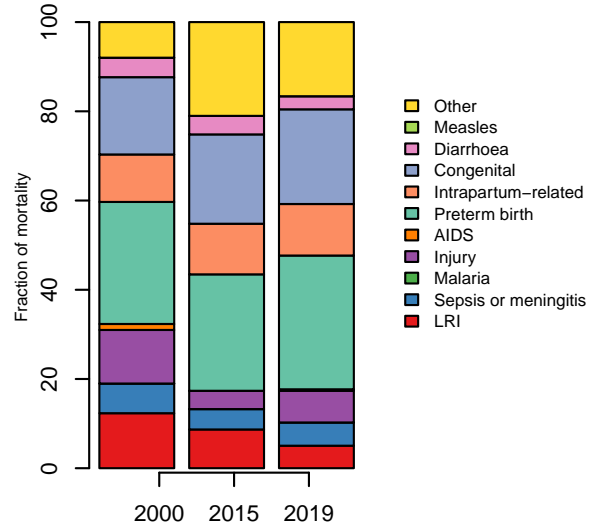

### Belize (Neonatal)

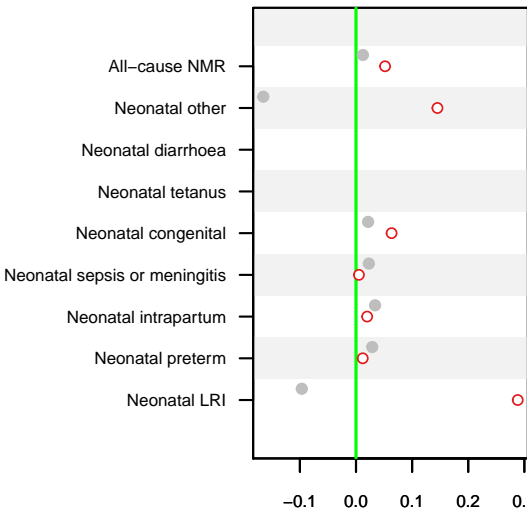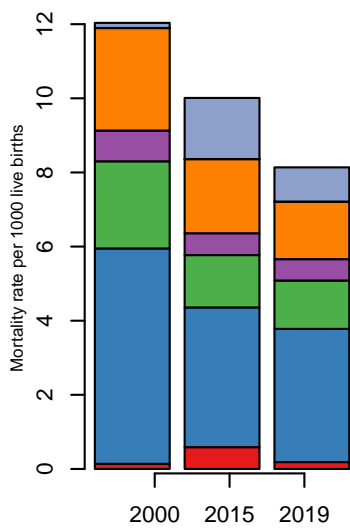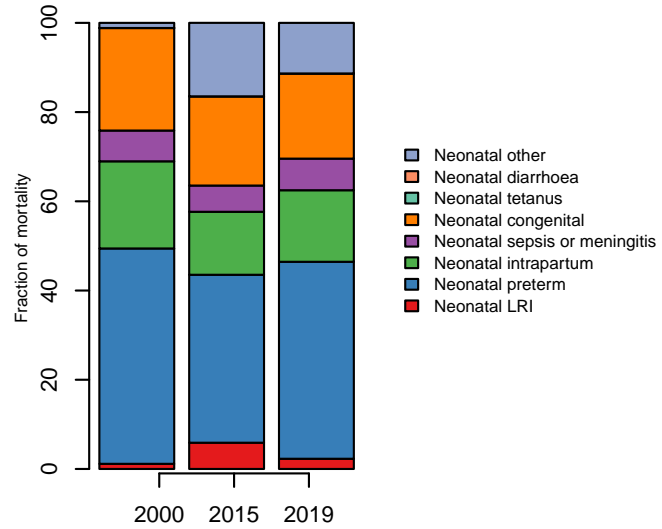

● 2000 – 2015      ● 2015 – 2019 (not on target)      → Deficit to target      ○ 2015 – 2019 (on target)

### Bolivia (Plurinational State of) (Under five)

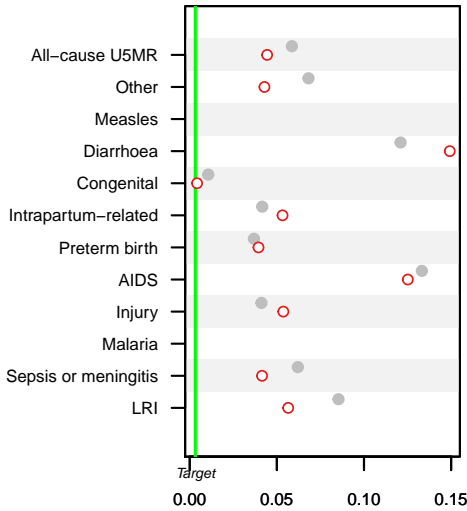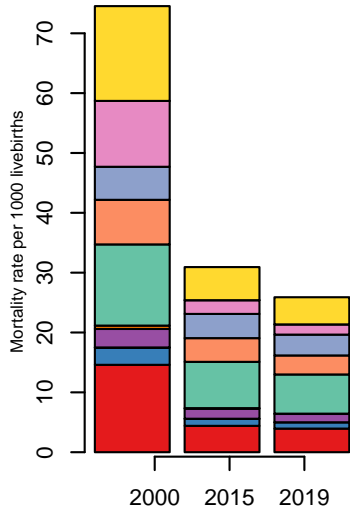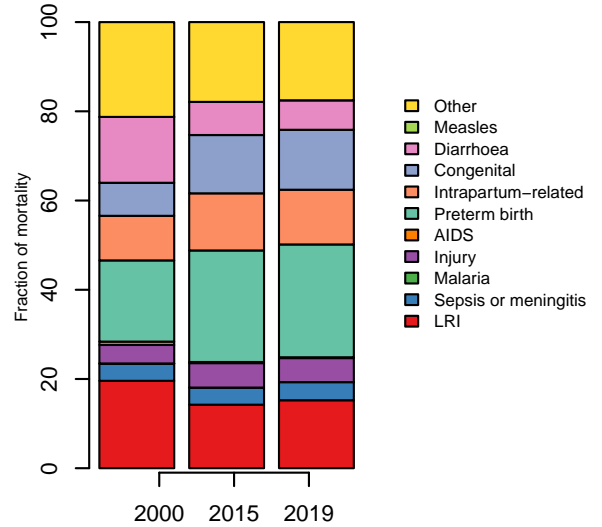

### Bolivia (Plurinational State of) (Neonatal)

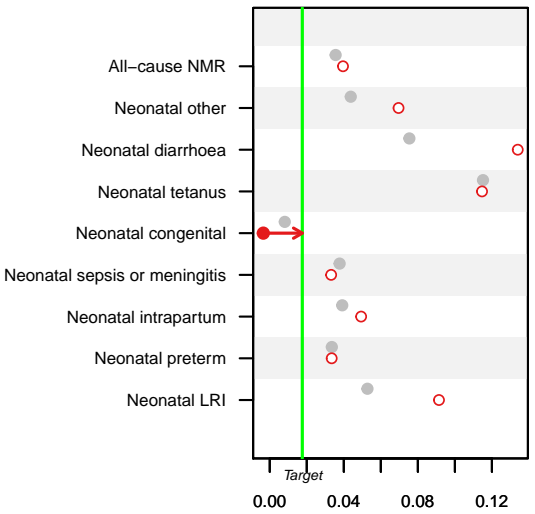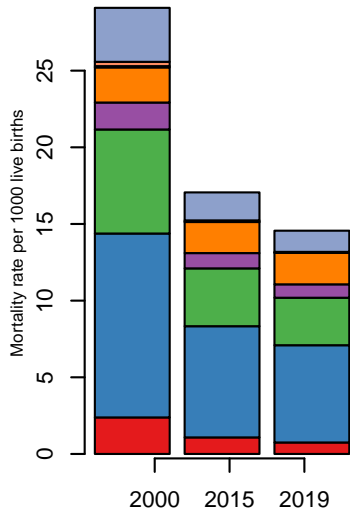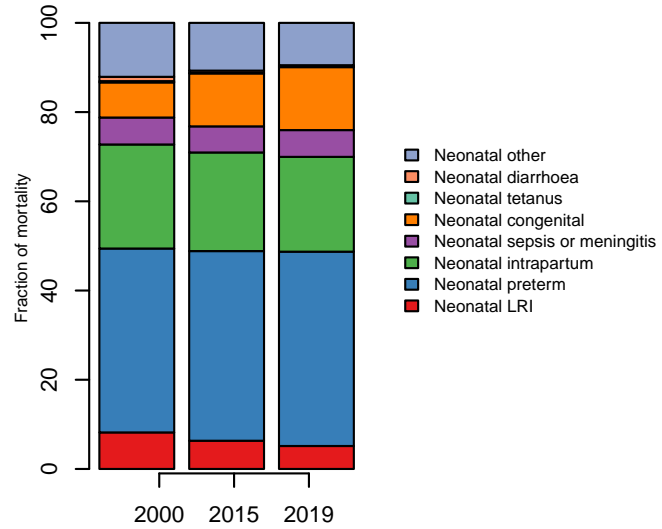

● 2000 – 2015      ● 2015 – 2019 (not on target)      → Deficit to target      ○ 2015 – 2019 (on target)

### Brazil (Under five)

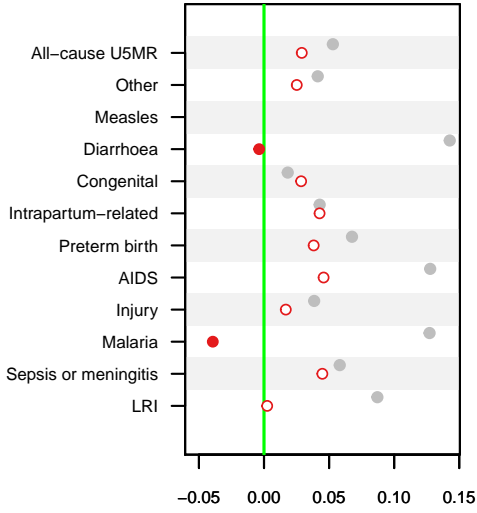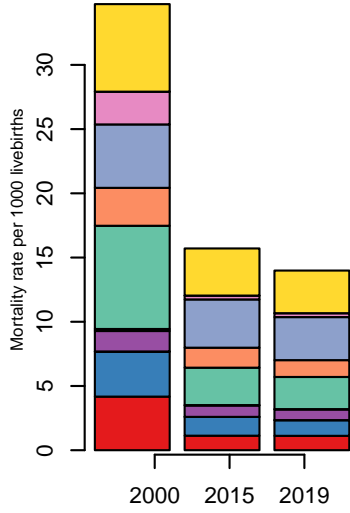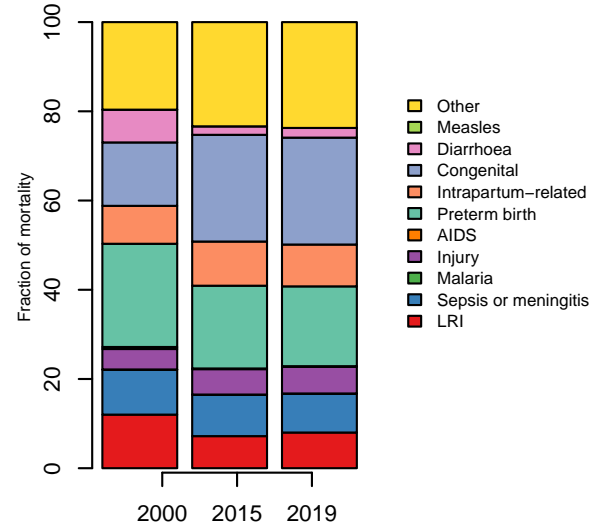

### Brazil (Neonatal)

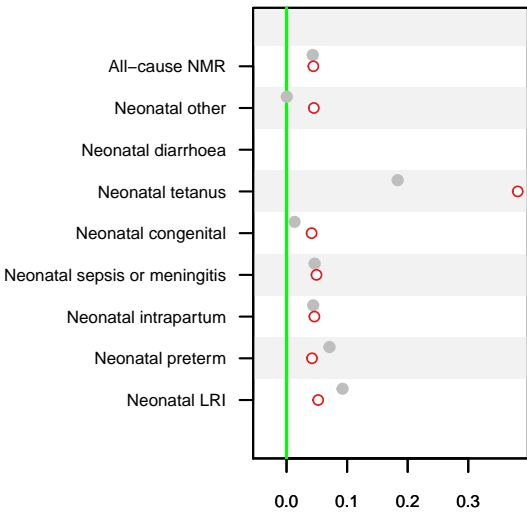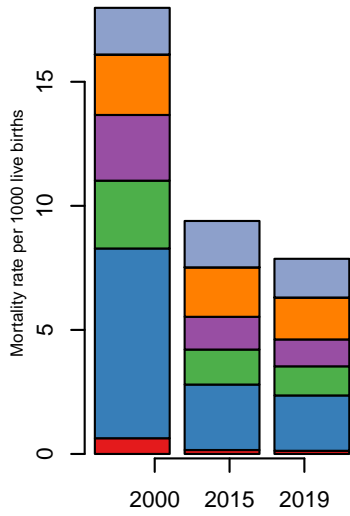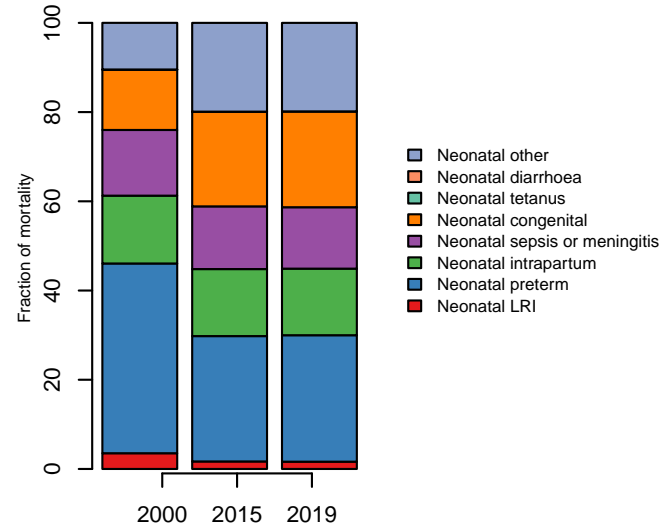

● 2000 – 2015      ● 2015 – 2019 (not on target)      → Deficit to target      ○ 2015 – 2019 (on target)



### Brunei Darussalam (Under five)

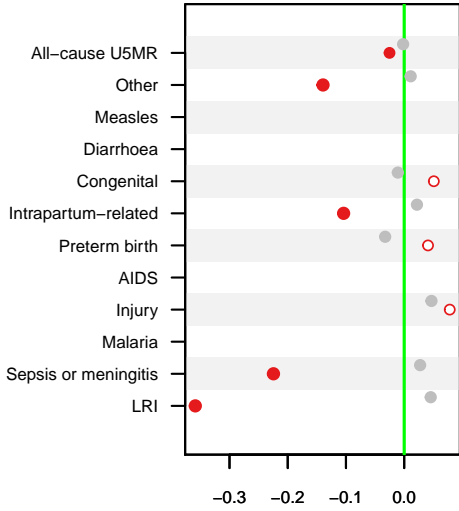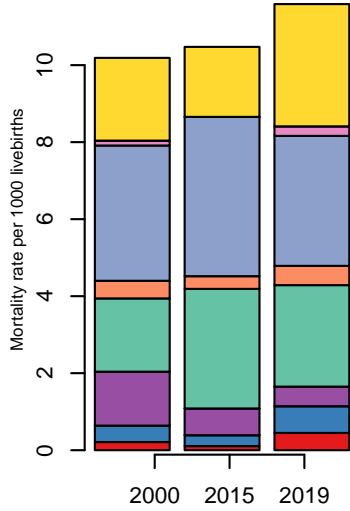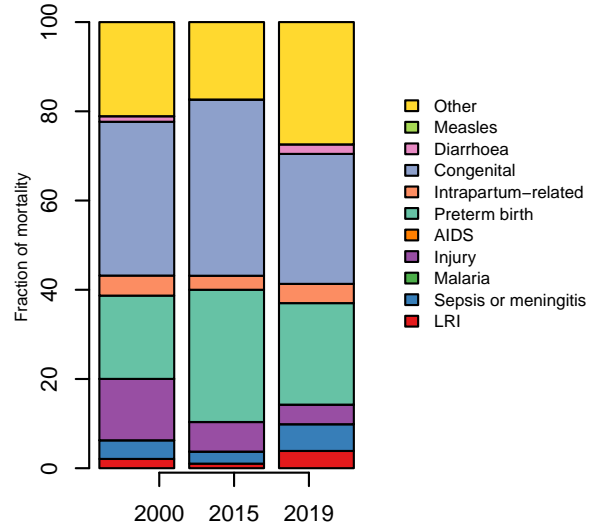

### Brunei Darussalam (Neonatal)

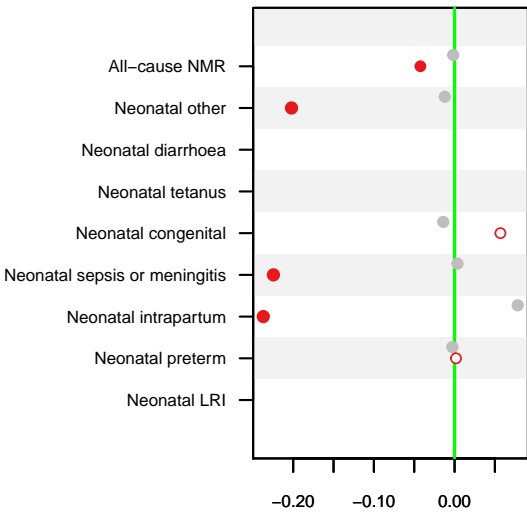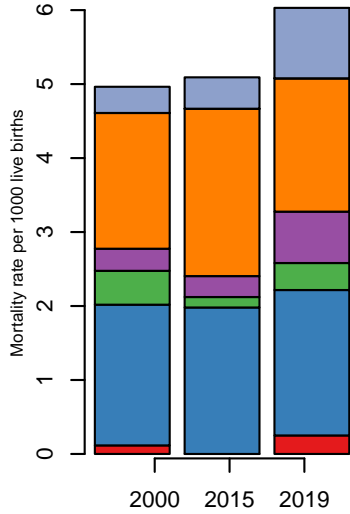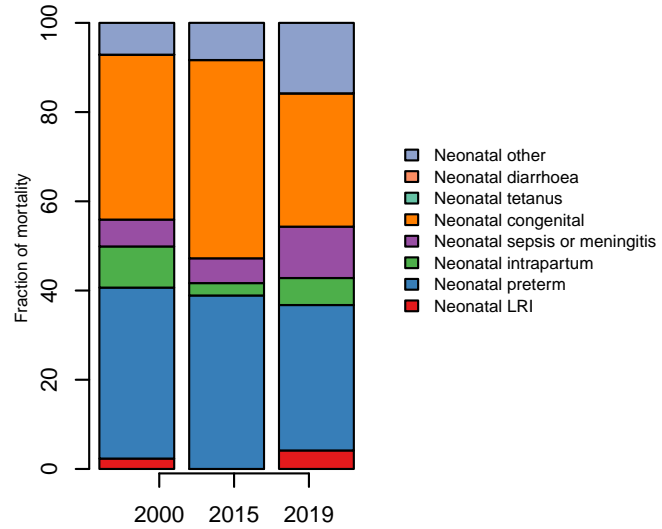

● 2000 – 2015      ● 2015 – 2019 (not on target)      → Deficit to target      ○ 2015 – 2019 (on target)

### Bhutan (Under five)

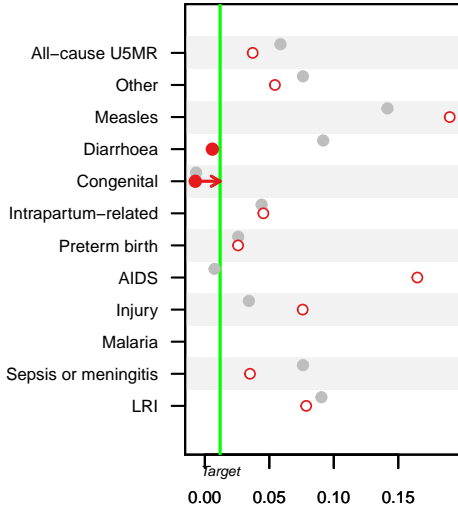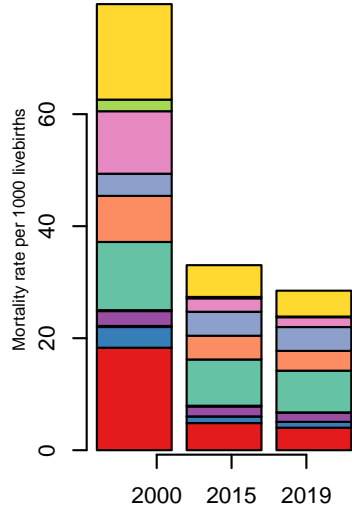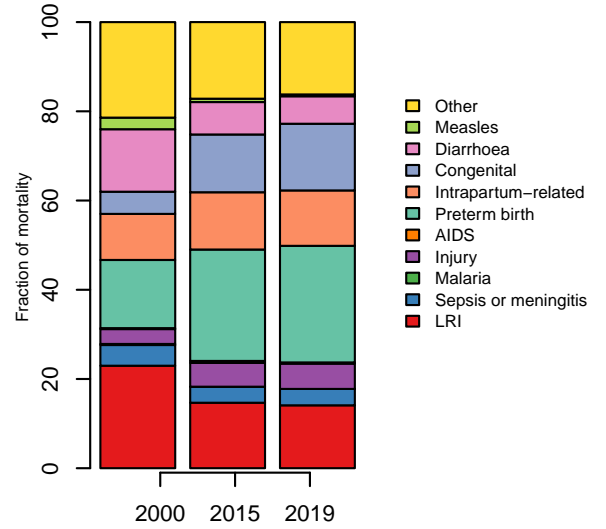

### Bhutan (Neonatal)

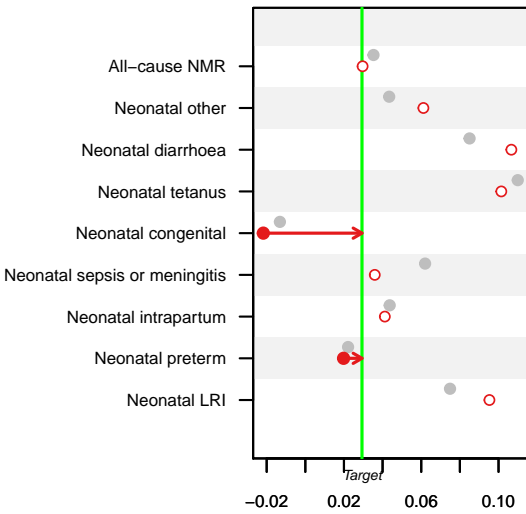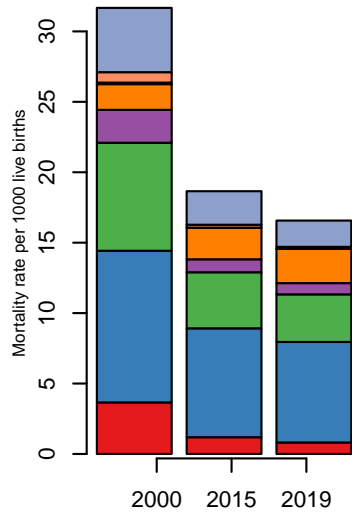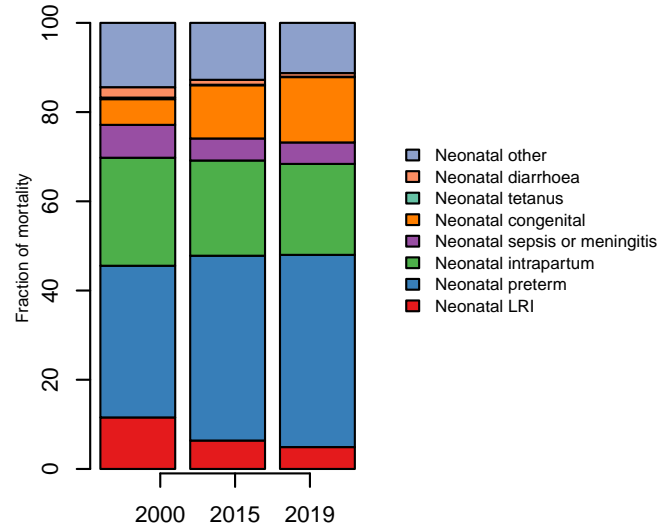

● 2000 – 2015      ● 2015 – 2019 (not on target)      → Deficit to target      ○ 2015 – 2019 (on target)

### Botswana (Under five)

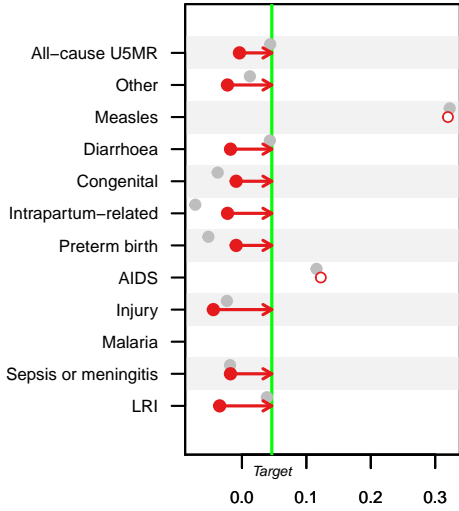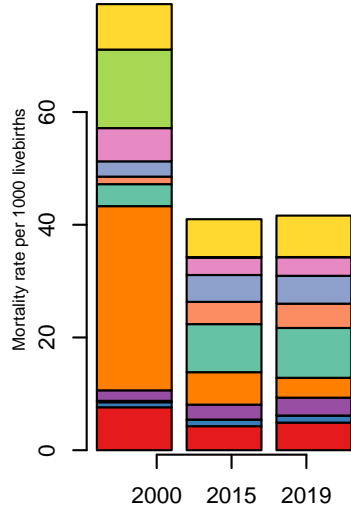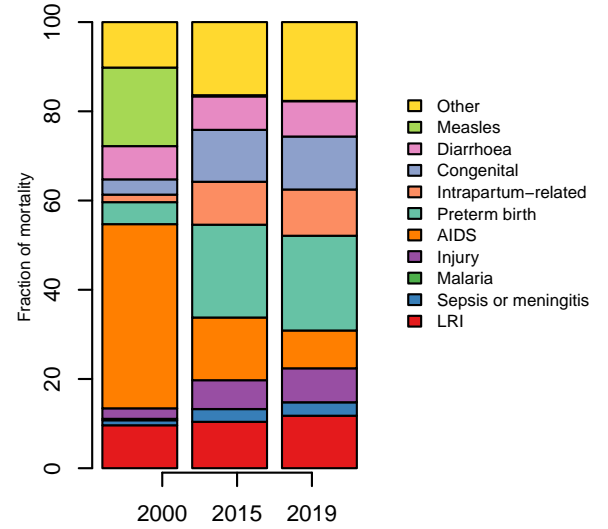

### Botswana (Neonatal)

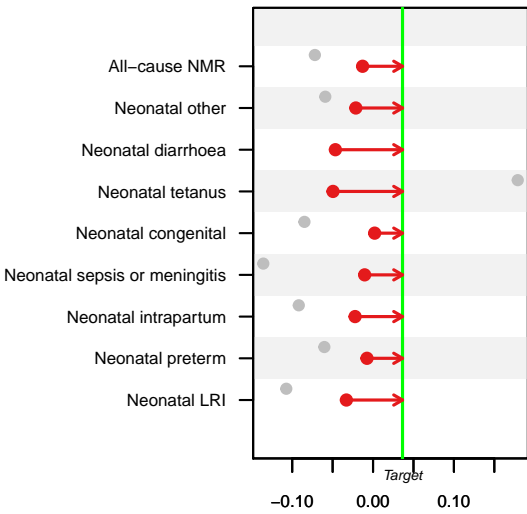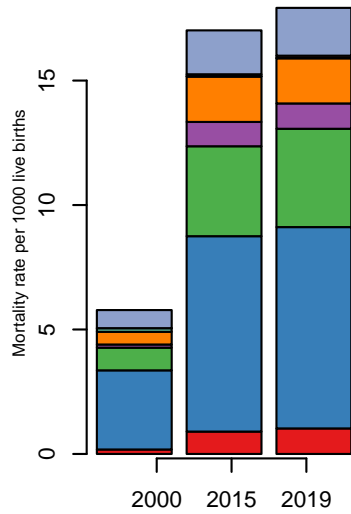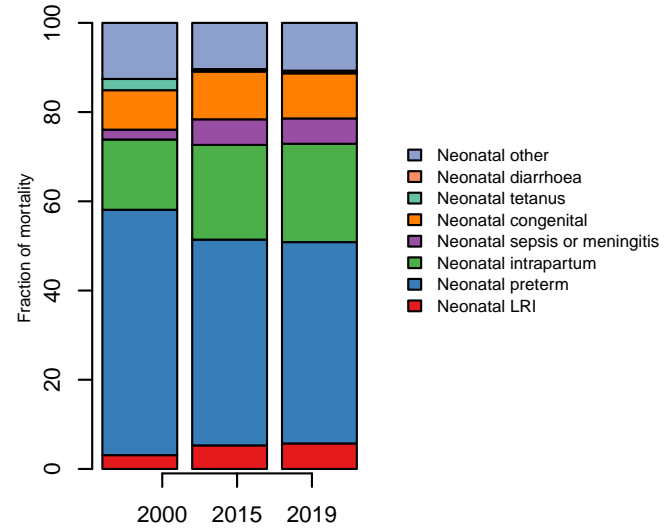

● 2000 – 2015

● 2015 – 2019 (not on target)

→ Deficit to target

○ 2015 – 2019 (on target)

### Central African Republic (Under five)

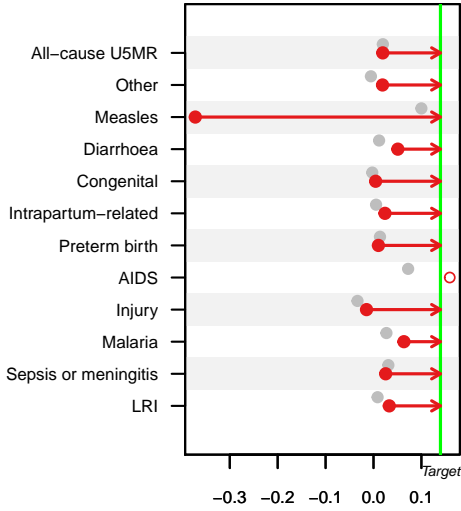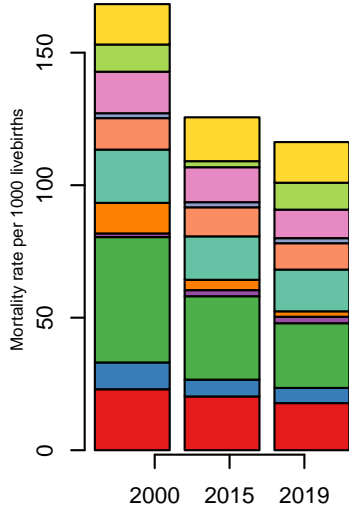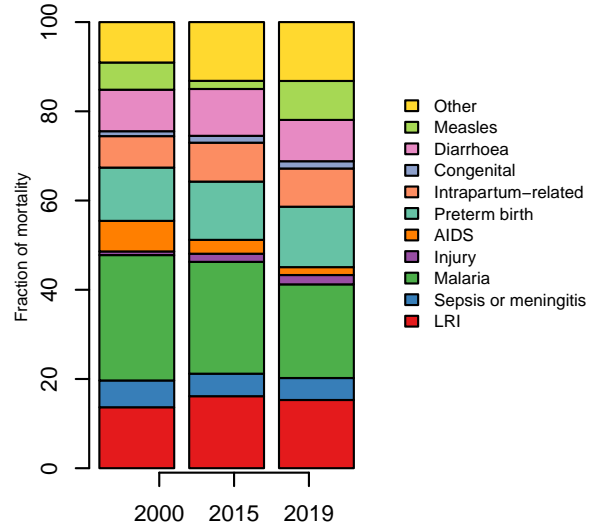

### Central African Republic (Neonatal)

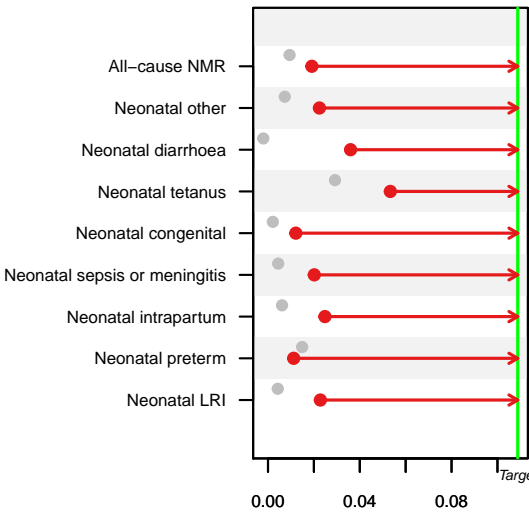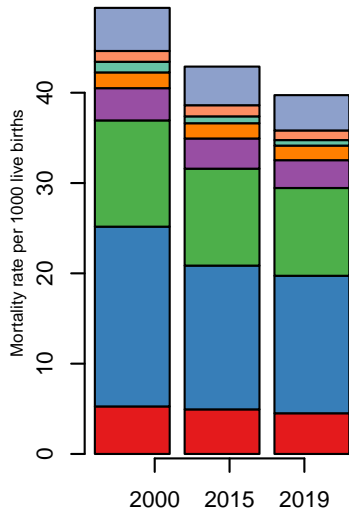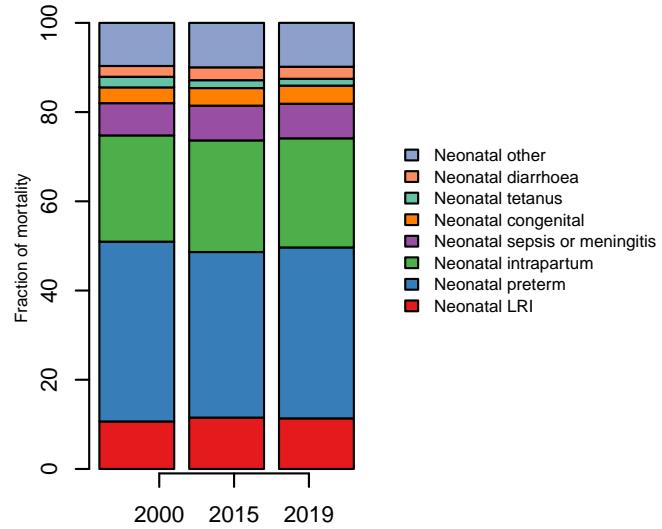

● 2000 – 2015      ● 2015 – 2019 (not on target)      → Deficit to target      ○ 2015 – 2019 (on target)

### Canada (Under five)

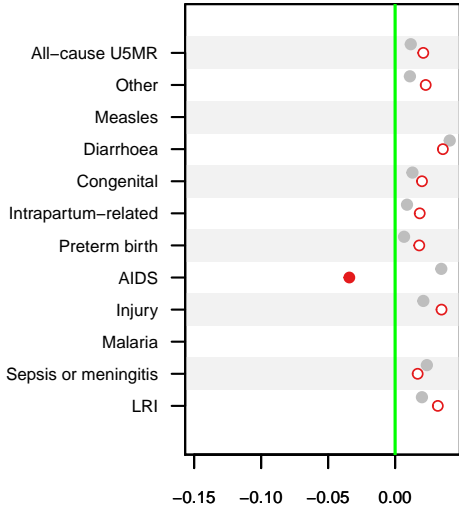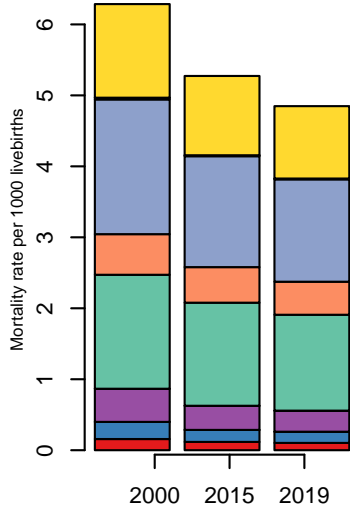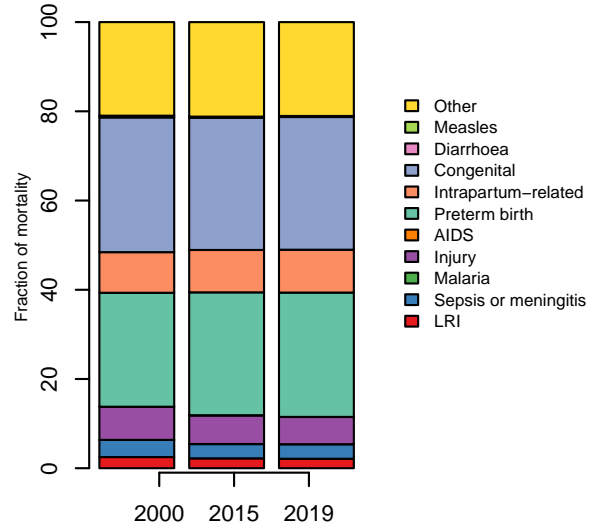

### Canada (Neonatal)

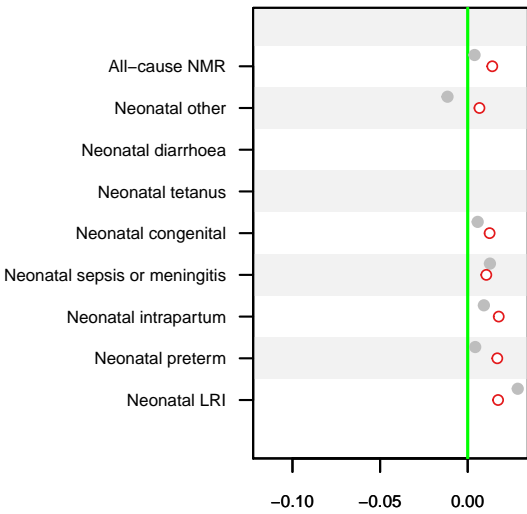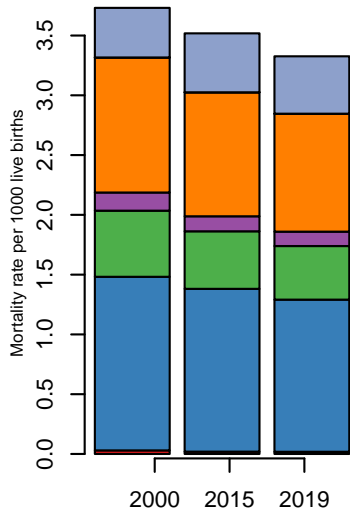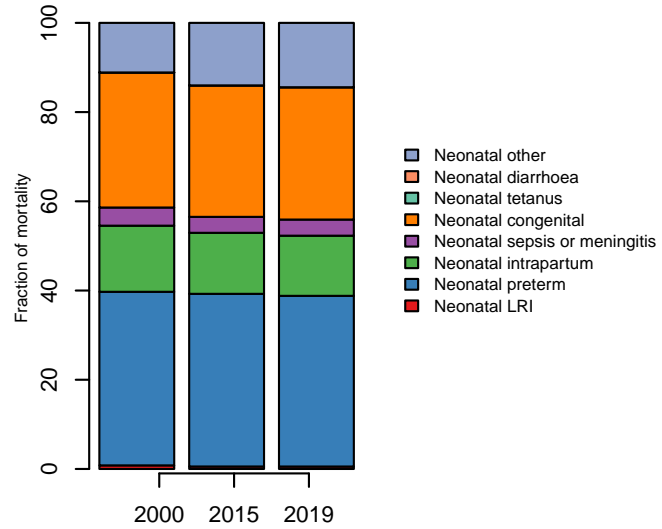

● 2000 – 2015      ● 2015 – 2019 (not on target)      → Deficit to target      ○ 2015 – 2019 (on target)

### Switzerland (Under five)

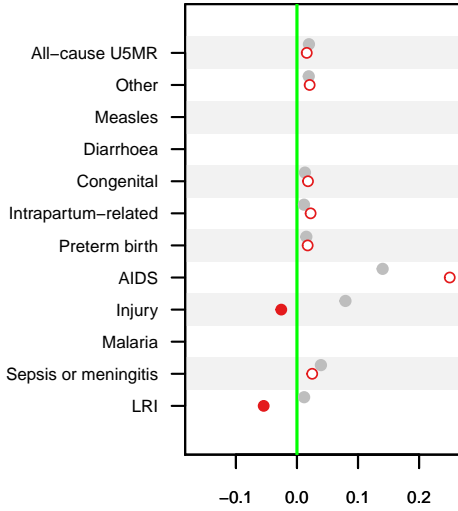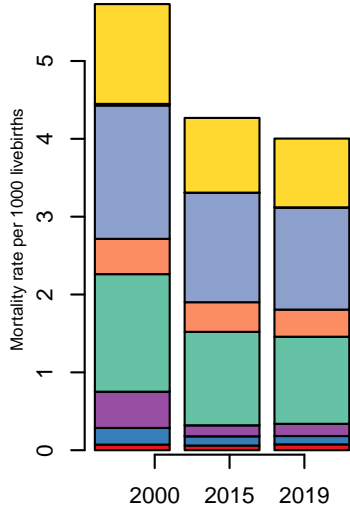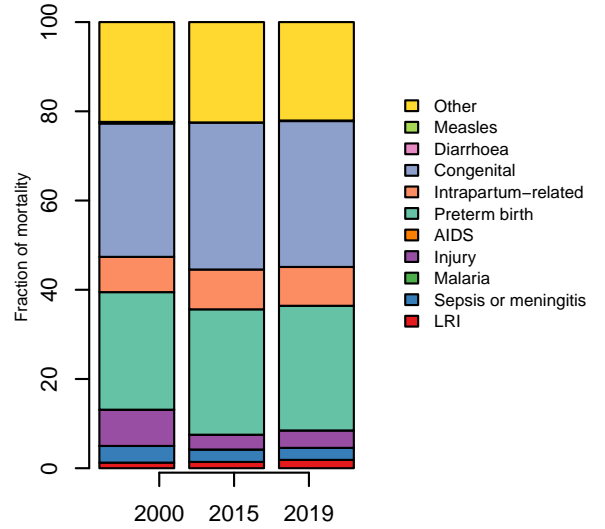

### Switzerland (Neonatal)

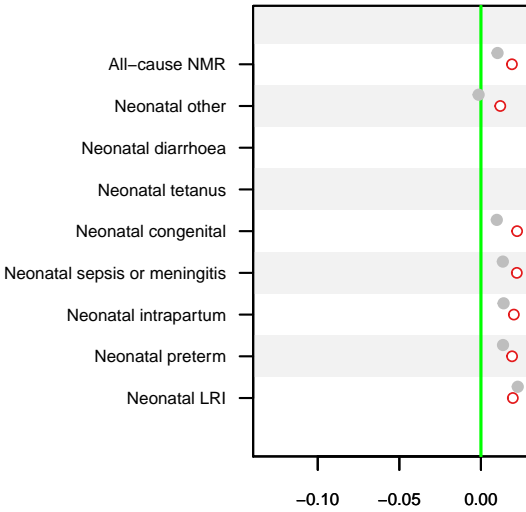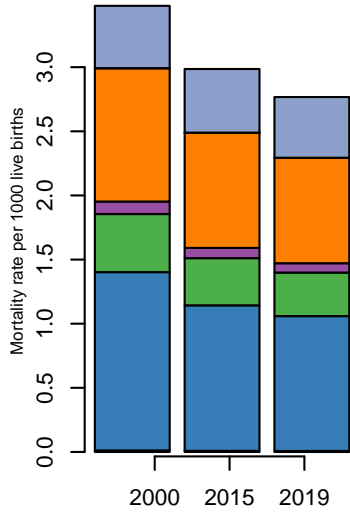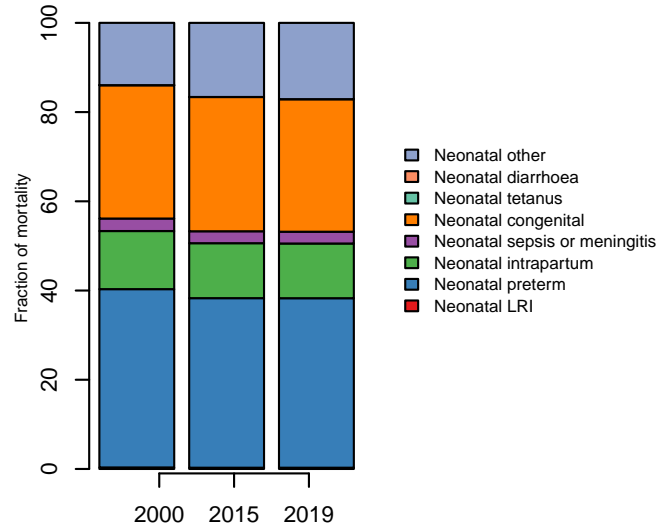

● 2000 – 2015      ● 2015 – 2019 (not on target)      → Deficit to target      ○ 2015 – 2019 (on target)

### Chile (Under five)

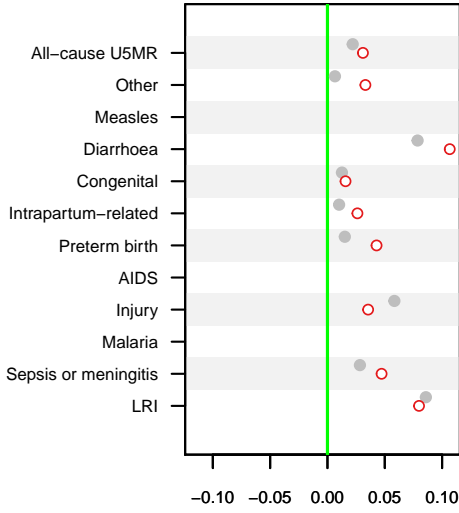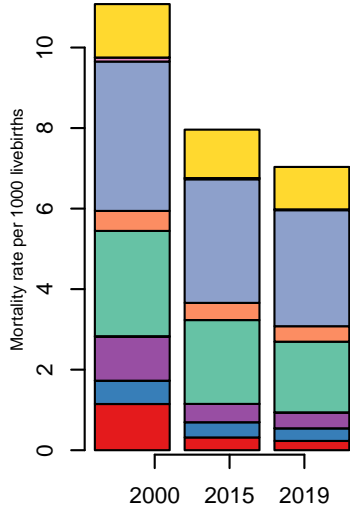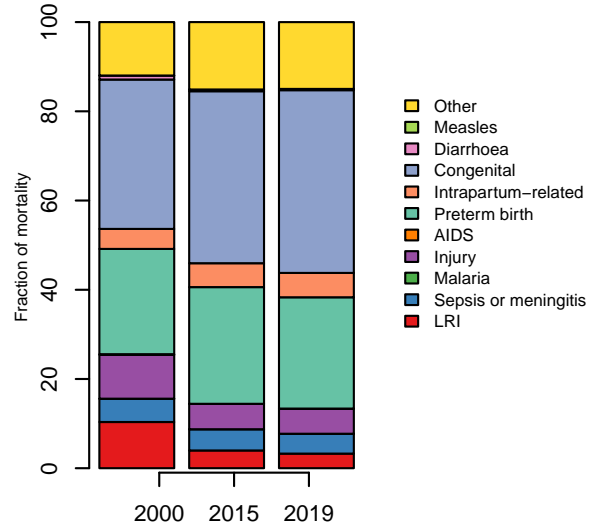

### Chile (Neonatal)

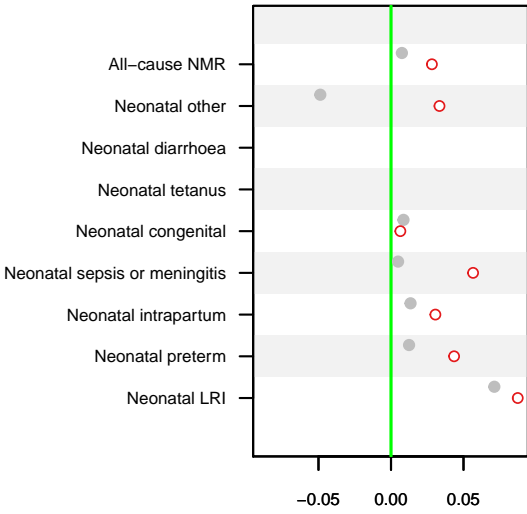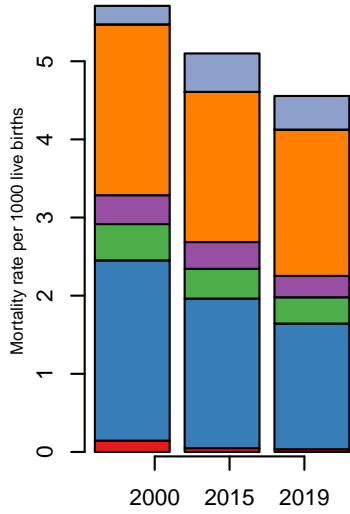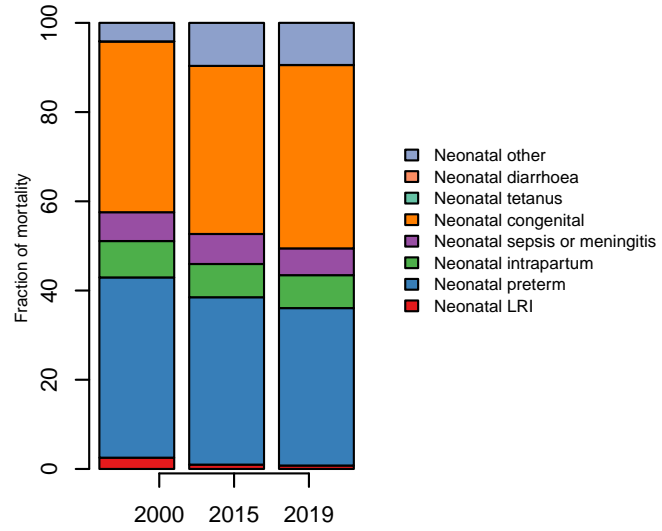

● 2000 – 2015      ● 2015 – 2019 (not on target)      → Deficit to target      ○ 2015 – 2019 (on target)

### China (Under five)

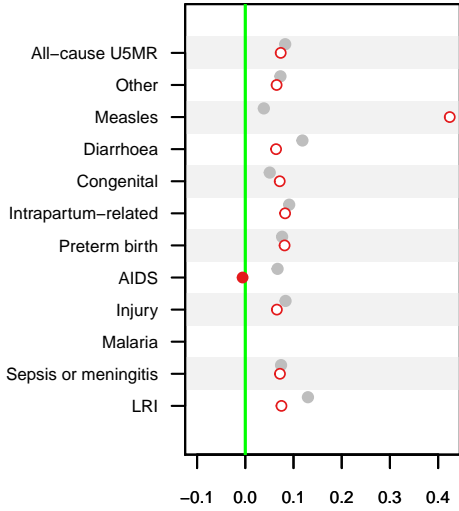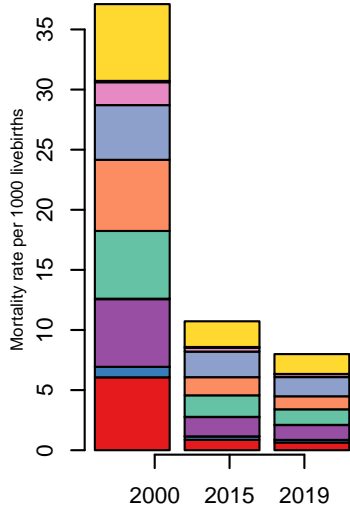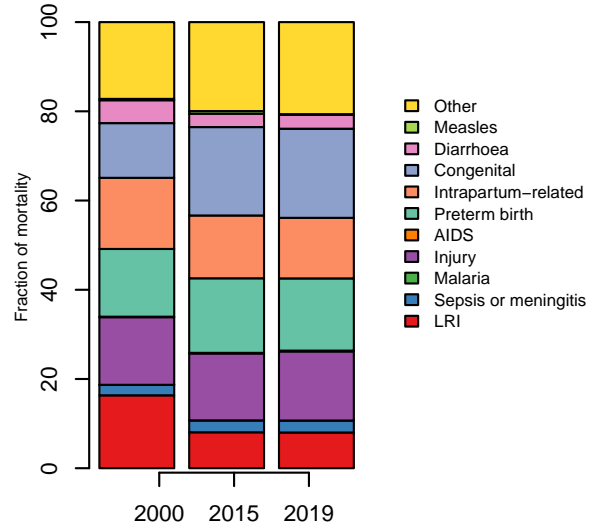

### China (Neonatal)

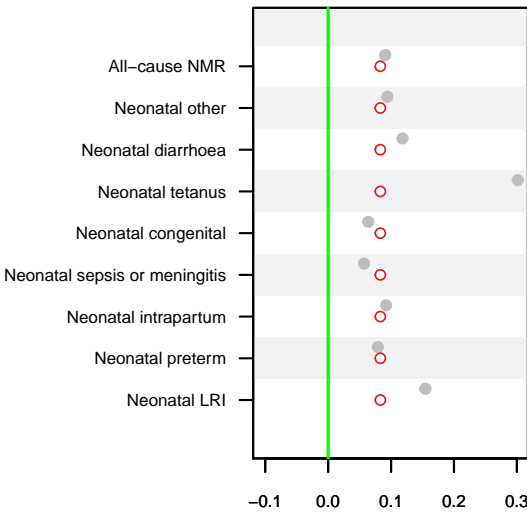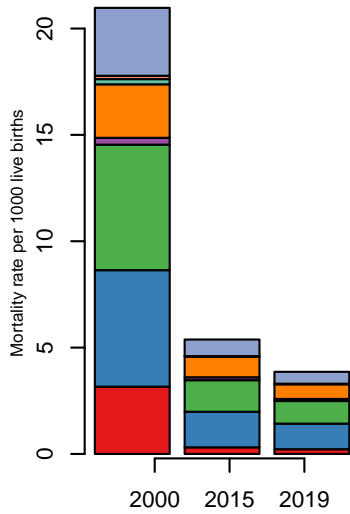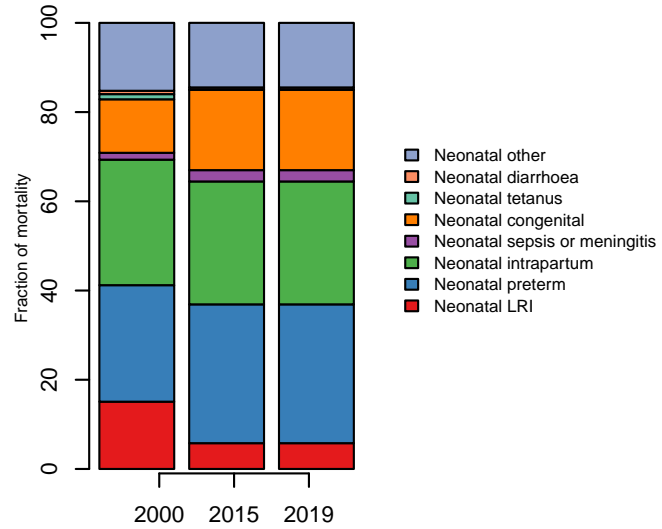

● 2000 - 2015      ● 2015 - 2019 (not on target)      → Deficit to target      ○ 2015 - 2019 (on target)



### Côte d'Ivoire (Under five)

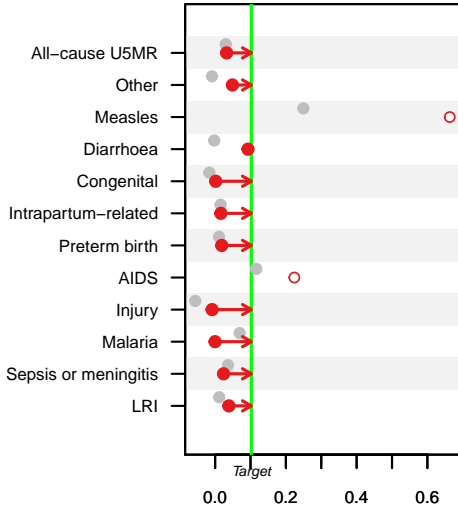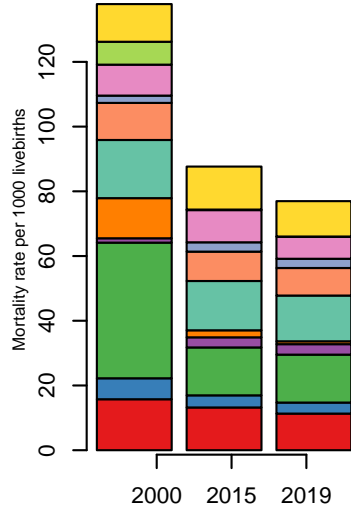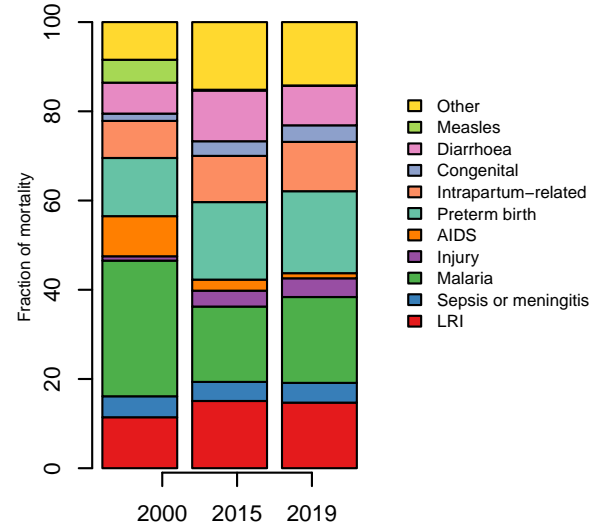

### Côte d'Ivoire (Neonatal)

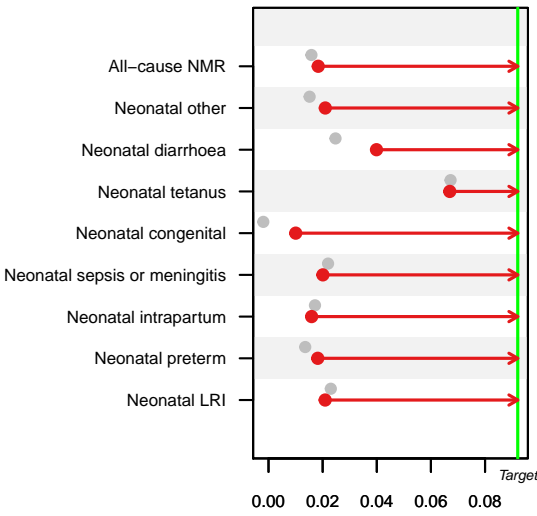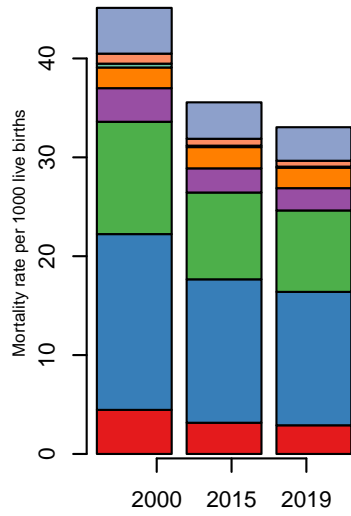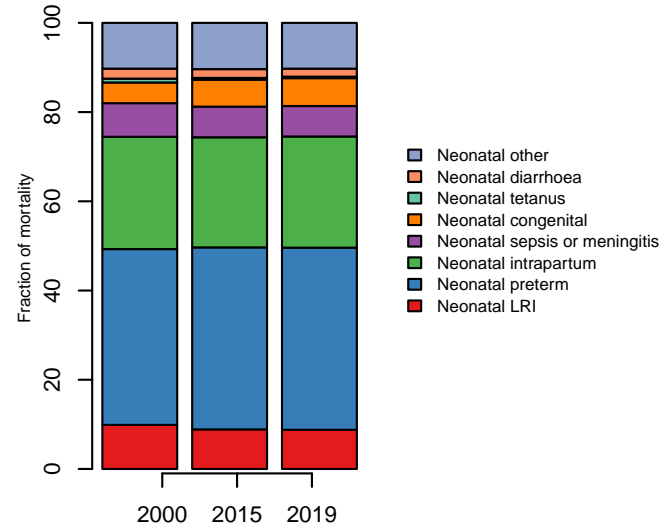

● 2000 – 2015      ● 2015 – 2019 (not on target)      → Deficit to target      ○ 2015 – 2019 (on target)

### Cameroon (Under five)

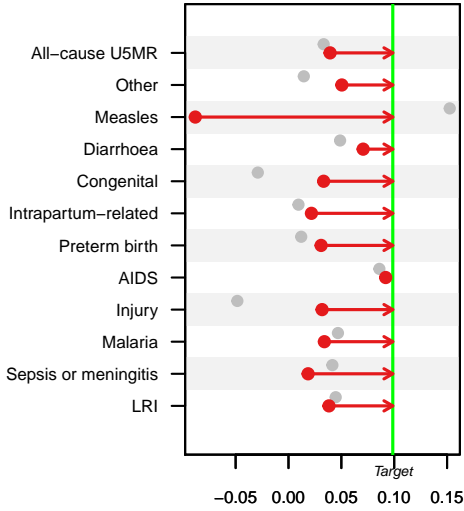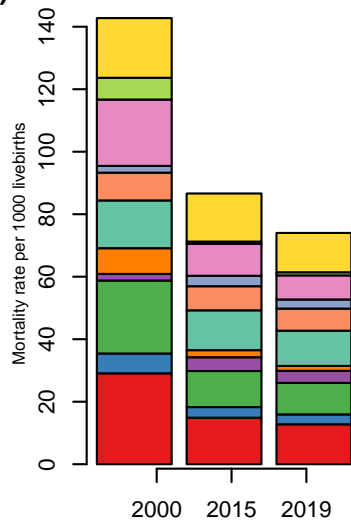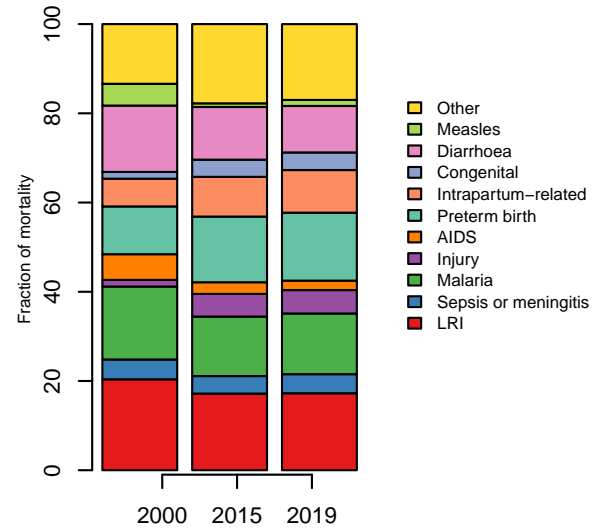

### Cameroon (Neonatal)

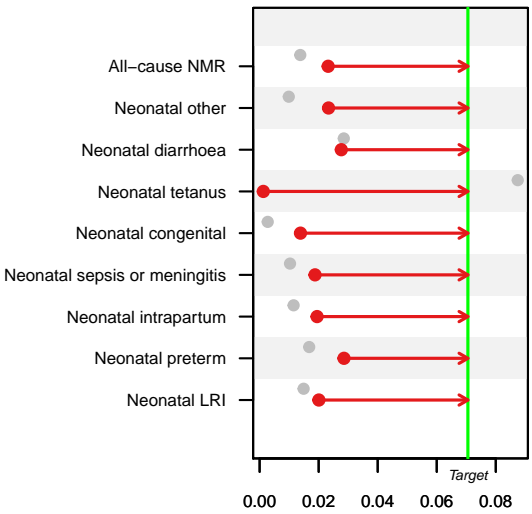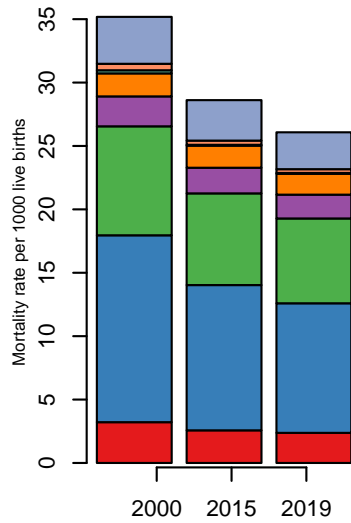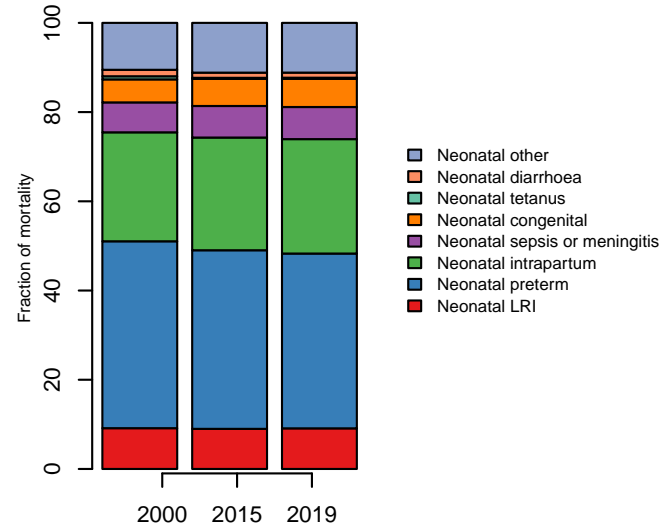

● 2000 – 2015      ● 2015 – 2019 (not on target)      → Deficit to target      ○ 2015 – 2019 (on target)

### Democratic Republic of the Congo (Under five)

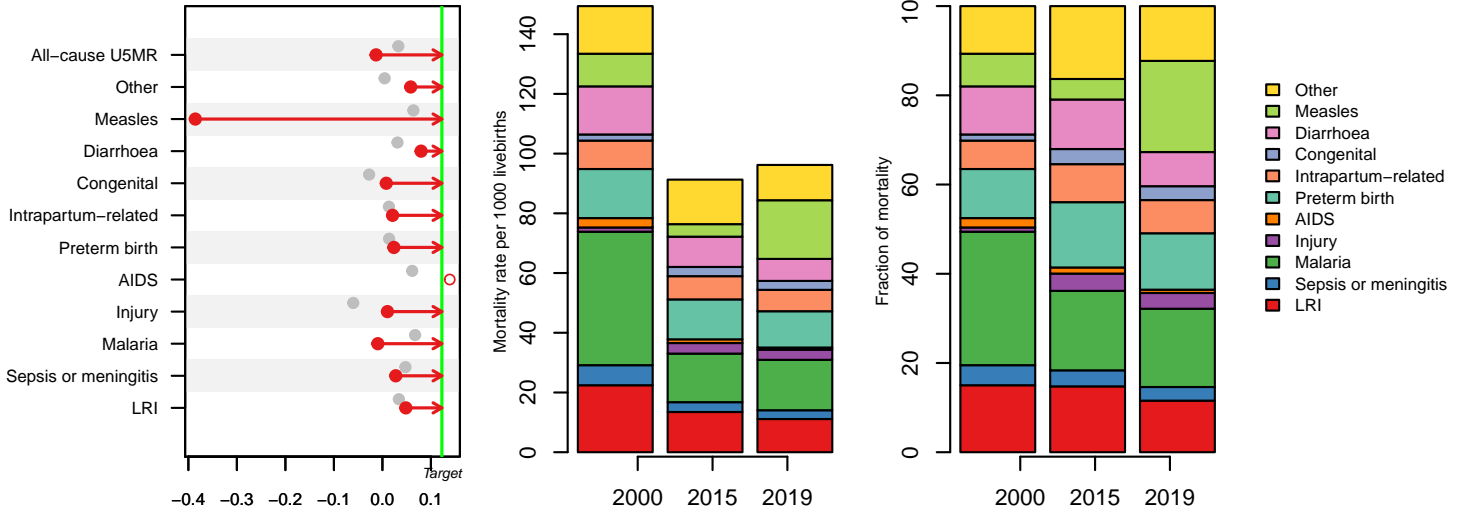

### Democratic Republic of the Congo (Neonatal)

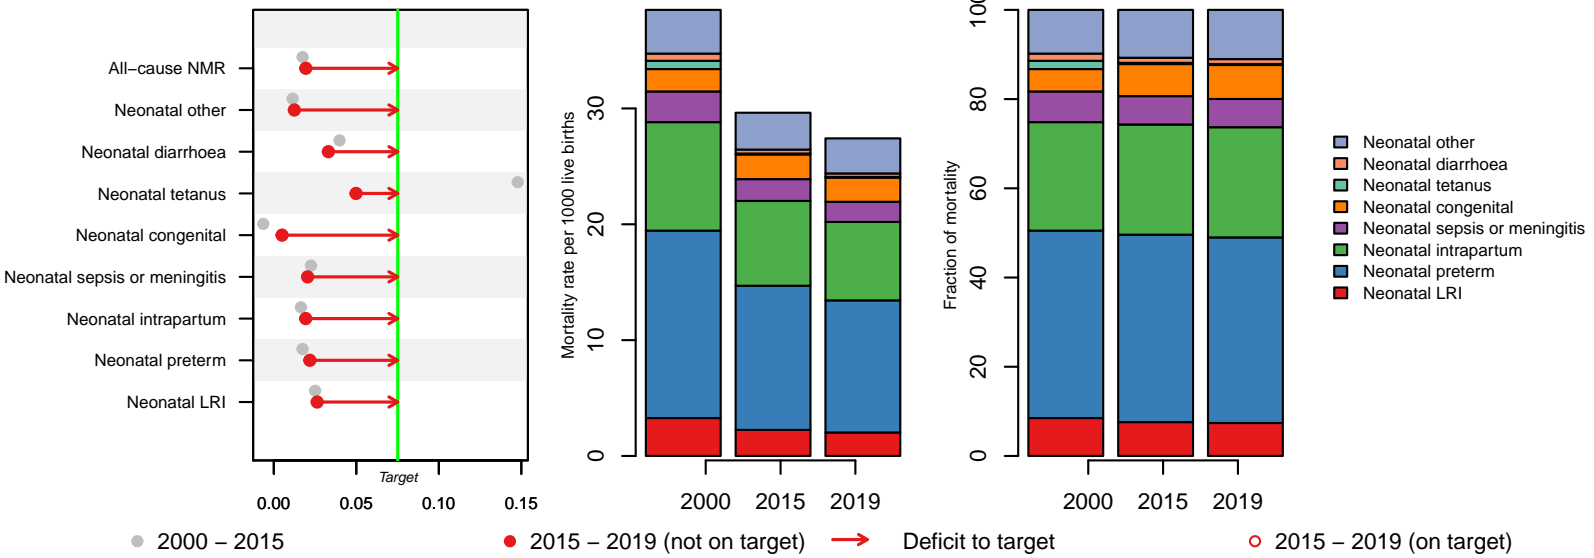

### Congo (Under five)

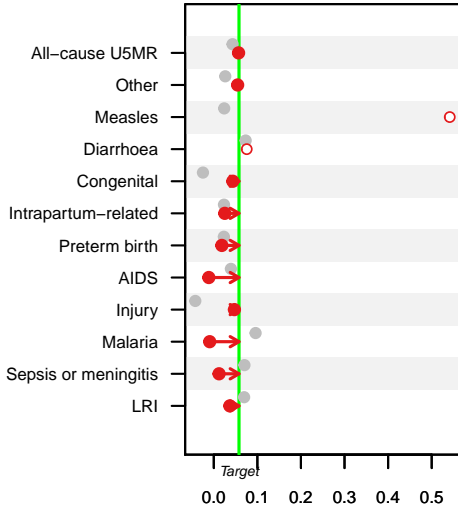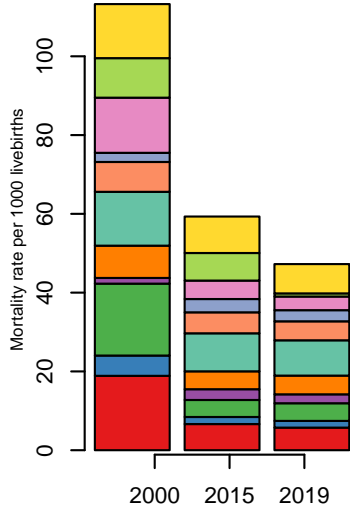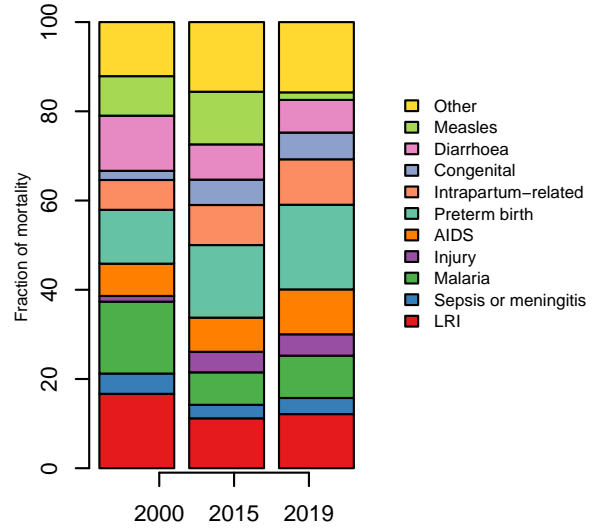

### Congo (Neonatal)

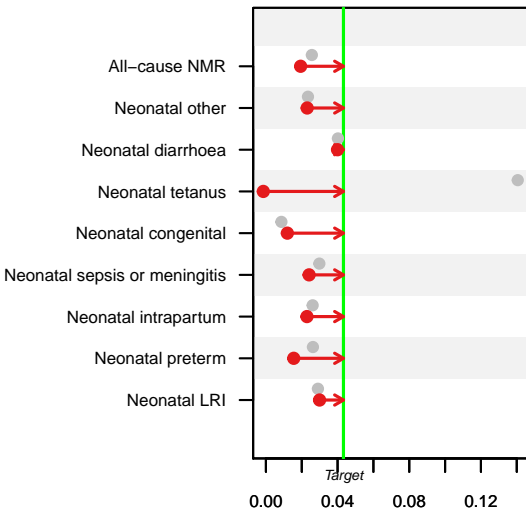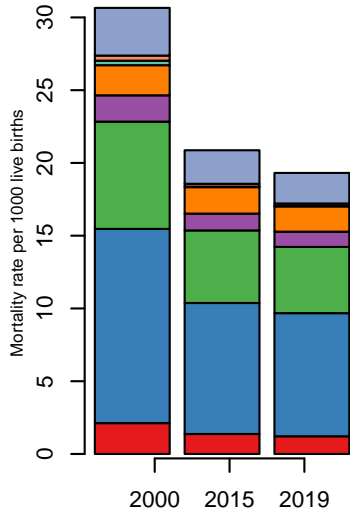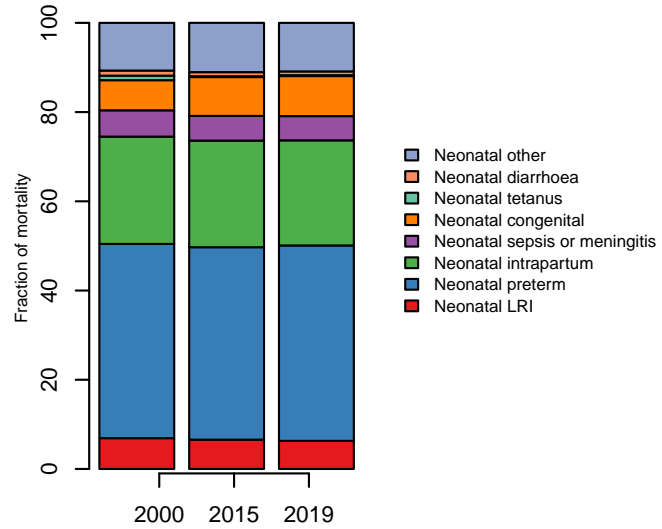

● 2000 – 2015      ● 2015 – 2019 (not on target)      → Deficit to target      ○ 2015 – 2019 (on target)

### Colombia (Under five)

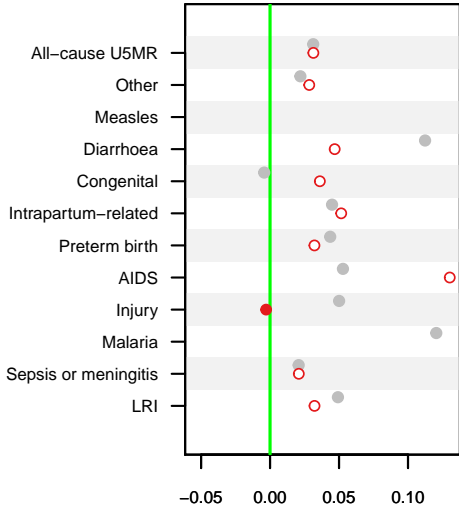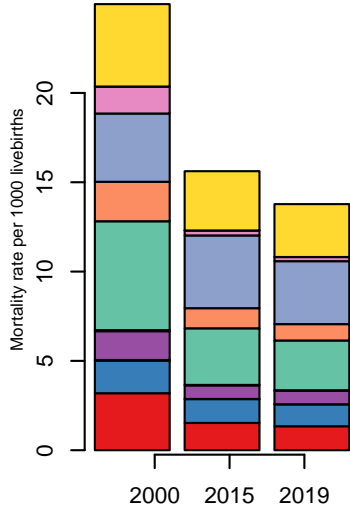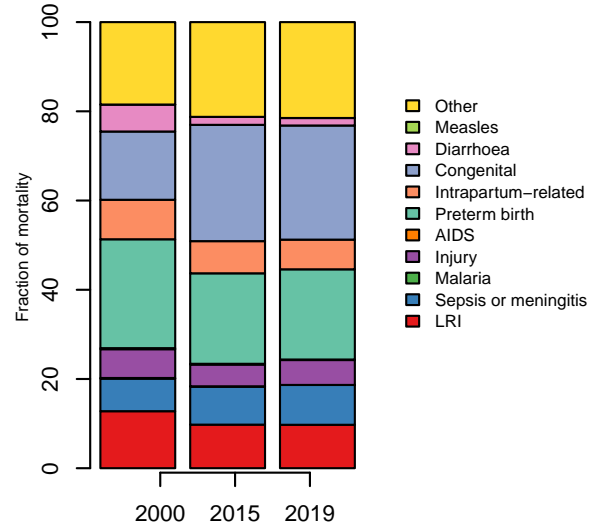

### Colombia (Neonatal)

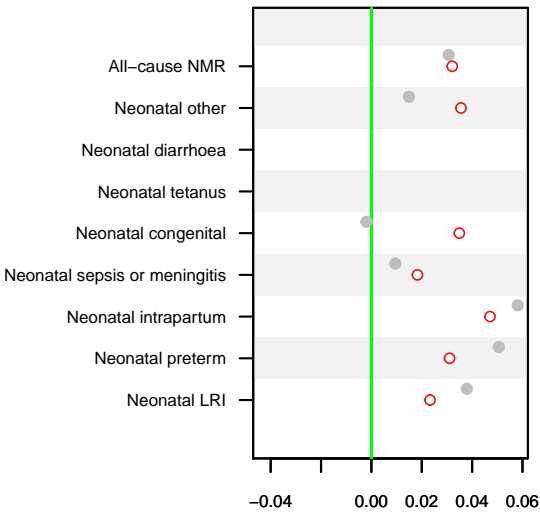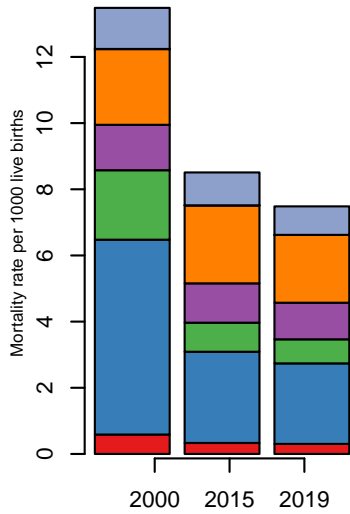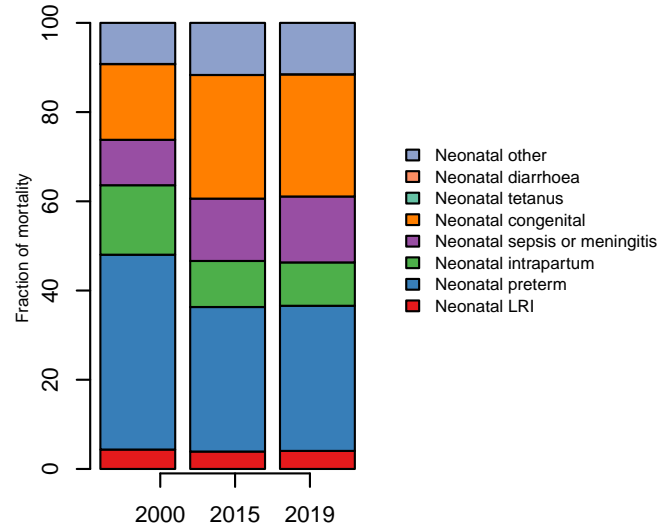

● 2000 – 2015      ● 2015 – 2019 (not on target)      → Deficit to target      ○ 2015 – 2019 (on target)

### Comoros (Under five)

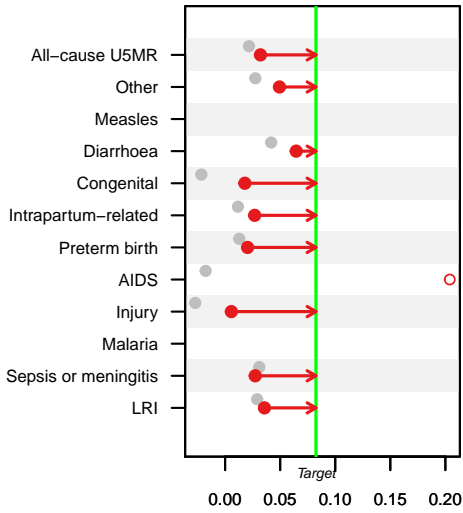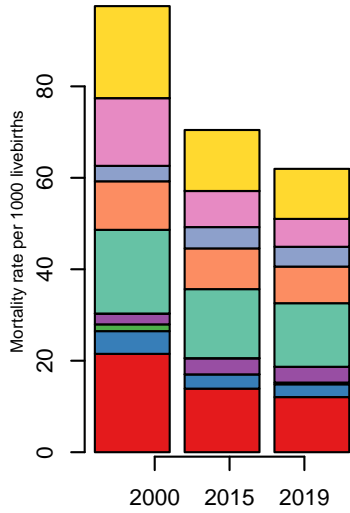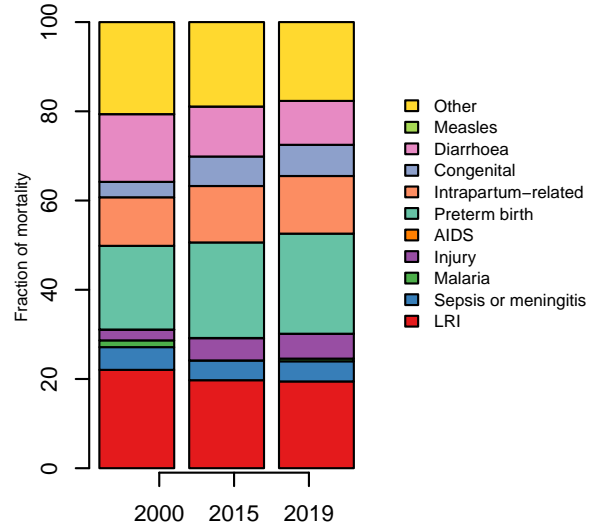

### Comoros (Neonatal)

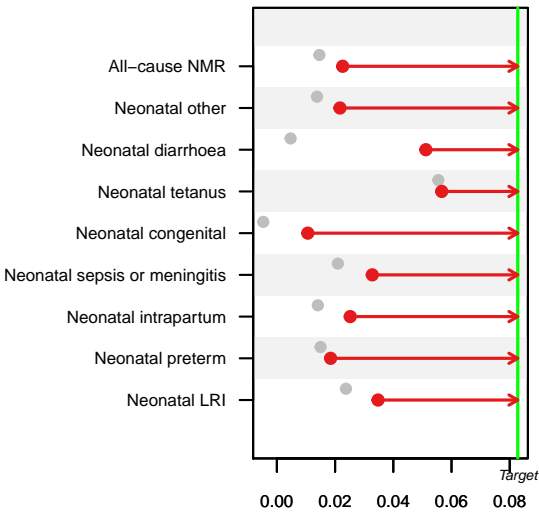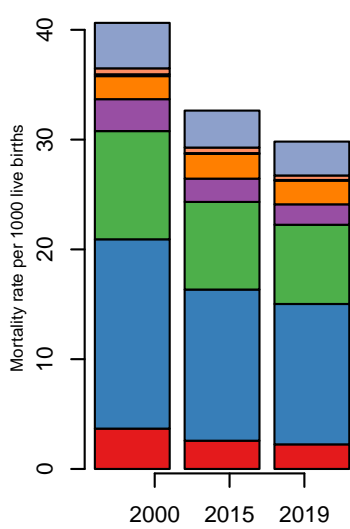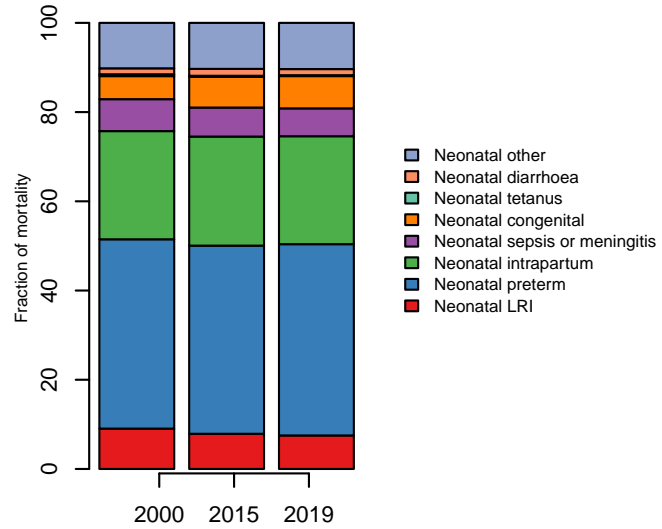

● 2000 – 2015      ● 2015 – 2019 (not on target)      → Deficit to target      ○ 2015 – 2019 (on target)

### Cabo Verde (Under five)

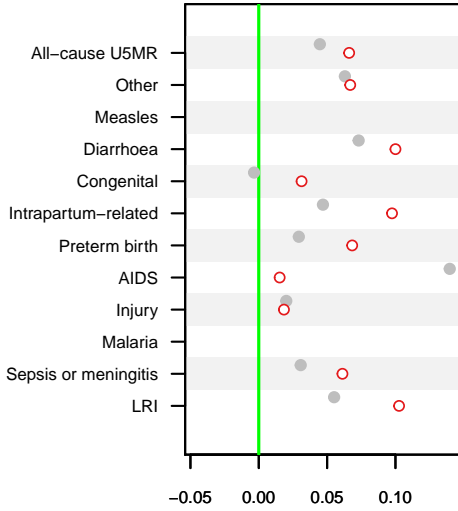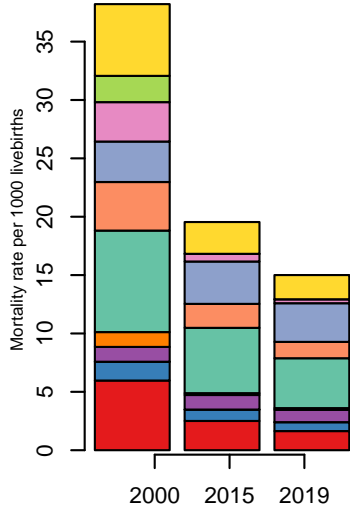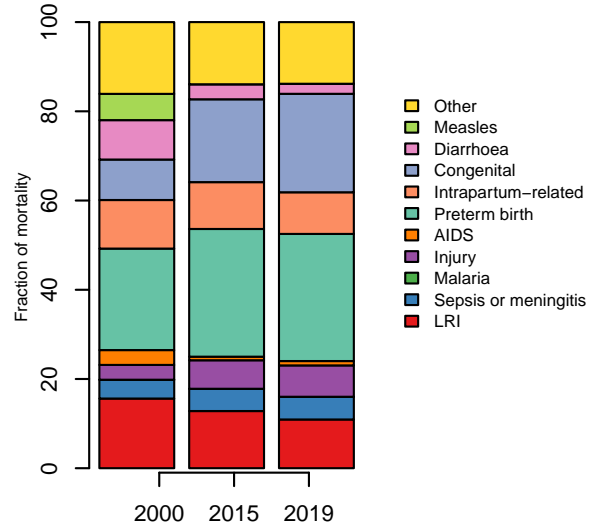

### Cabo Verde (Neonatal)

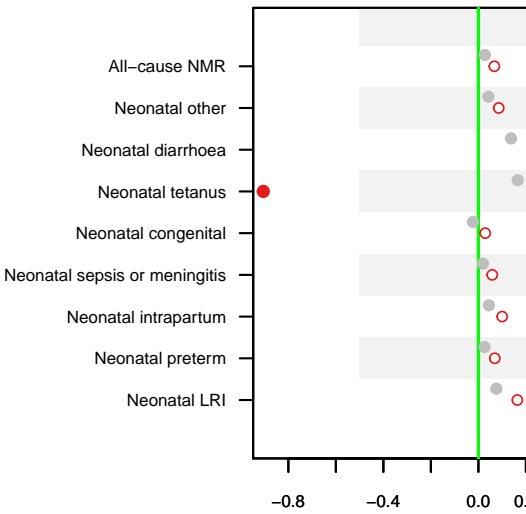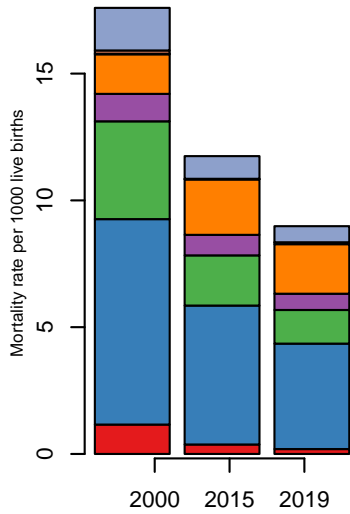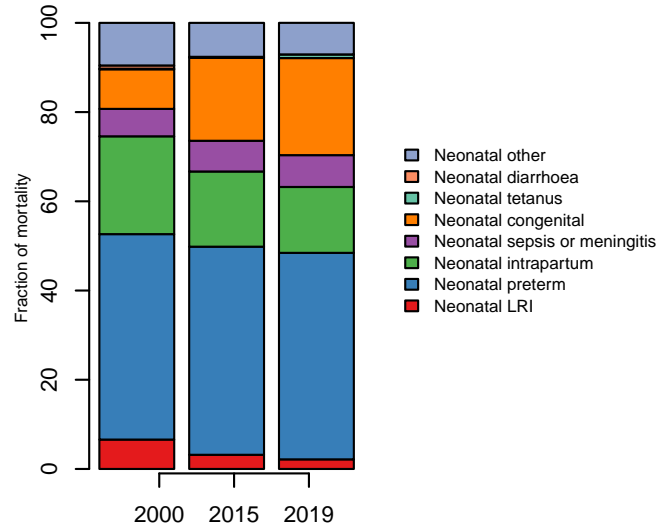

● 2000 – 2015      ● 2015 – 2019 (not on target)      → Deficit to target      ○ 2015 – 2019 (on target)

### Costa Rica (Under five)

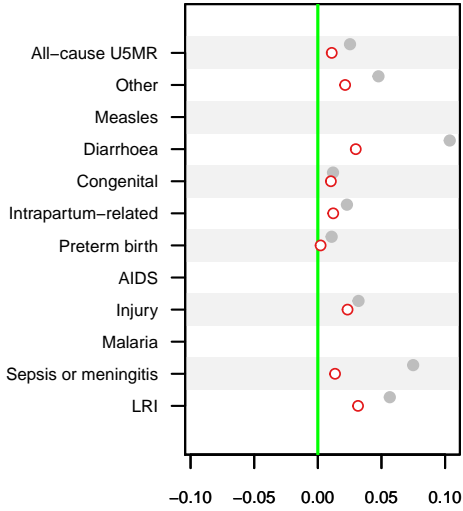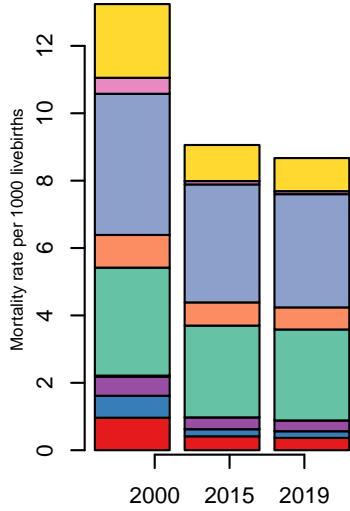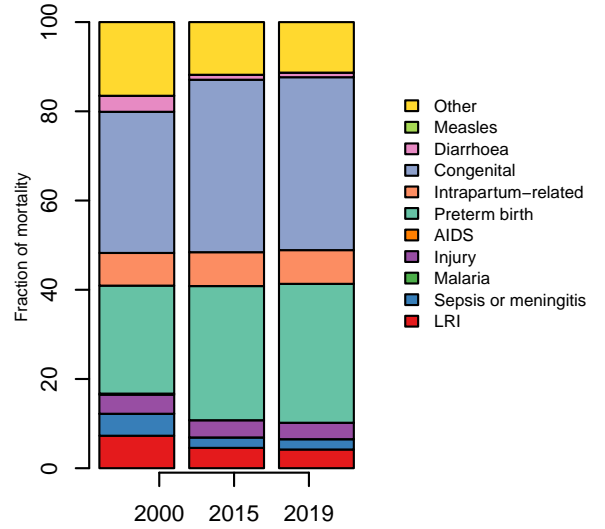

### Costa Rica (Neonatal)

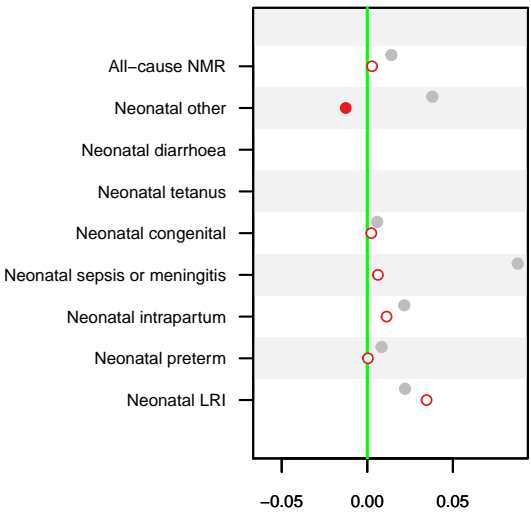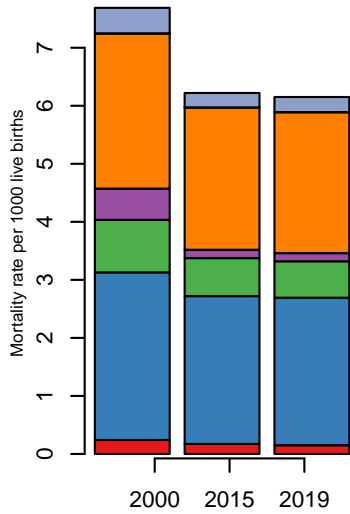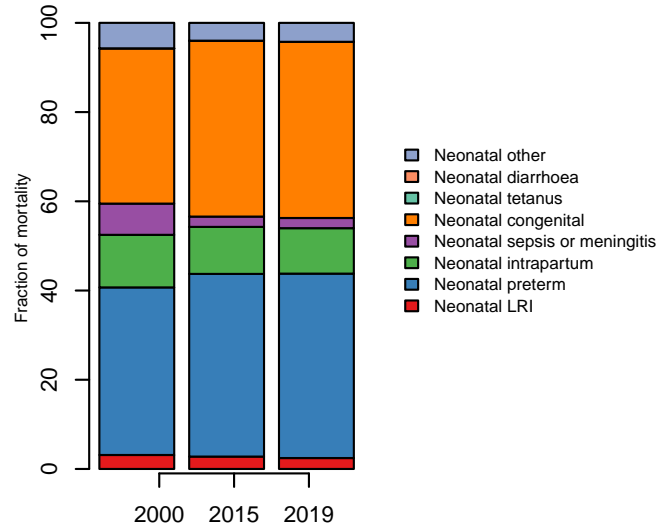

● 2000 – 2015      ● 2015 – 2019 (not on target)      → Deficit to target      ○ 2015 – 2019 (on target)



### Cuba (Under five)

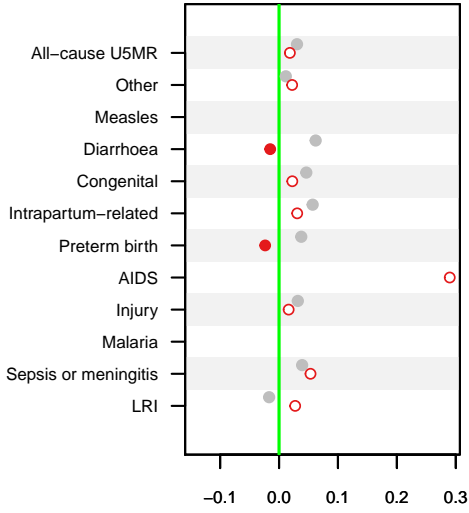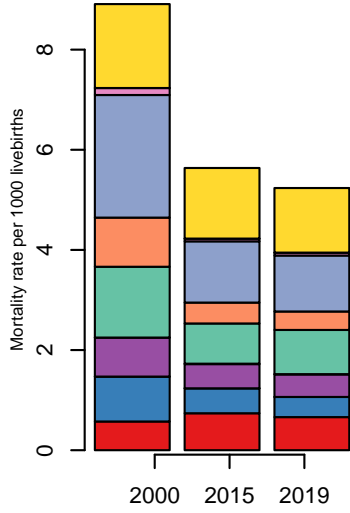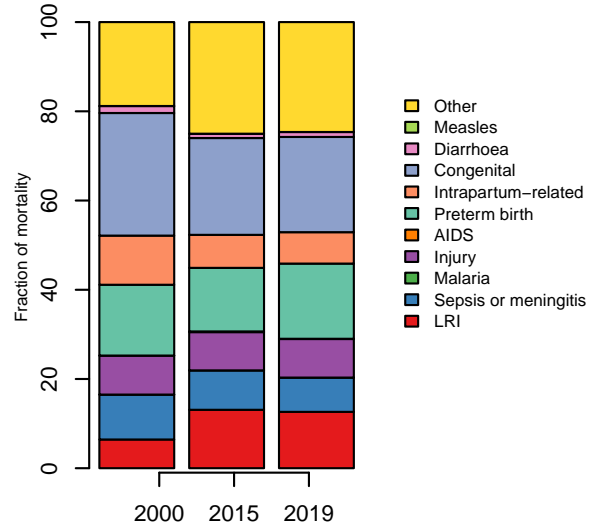

### Cuba (Neonatal)

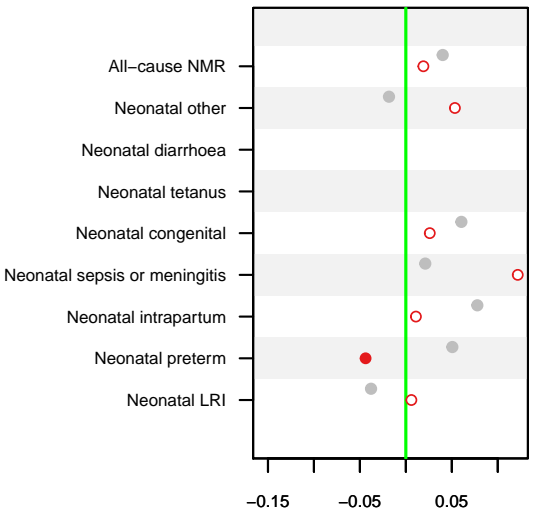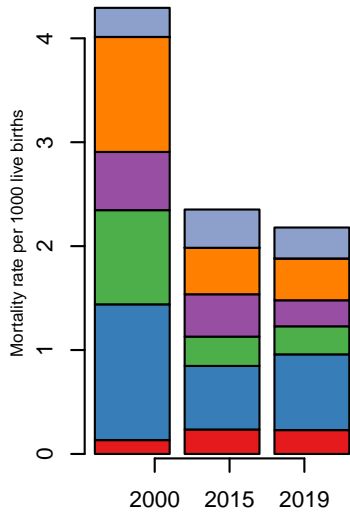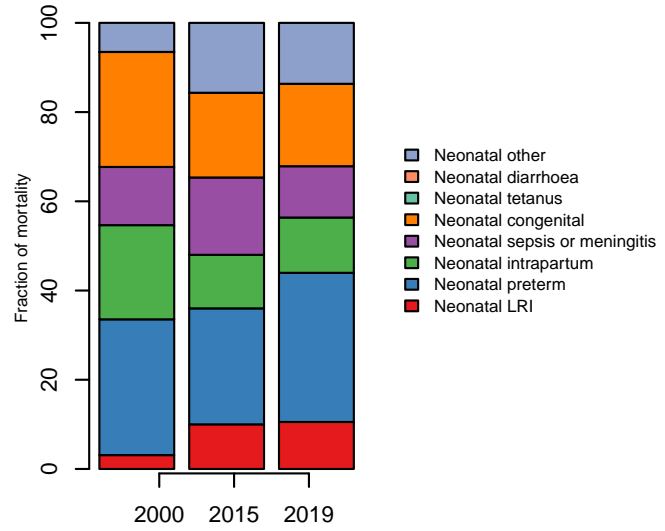

● 2000 – 2015      ● 2015 – 2019 (not on target)      → Deficit to target      ○ 2015 – 2019 (on target)

### Czechia (Under five)

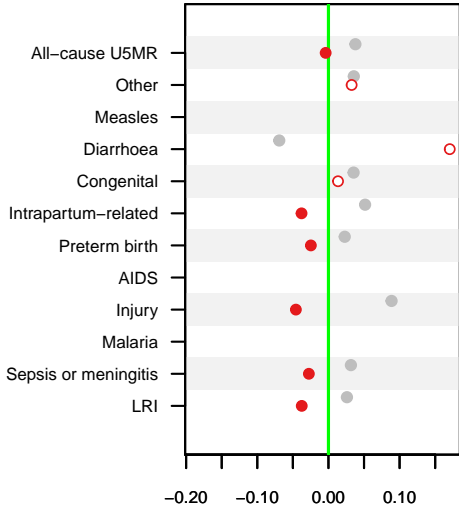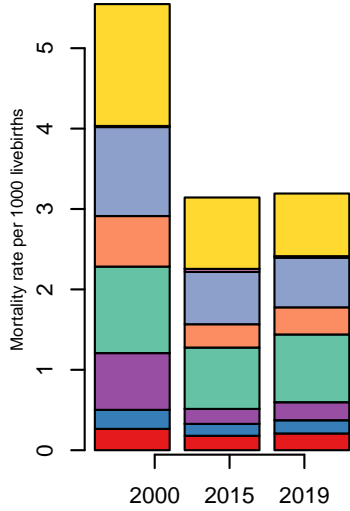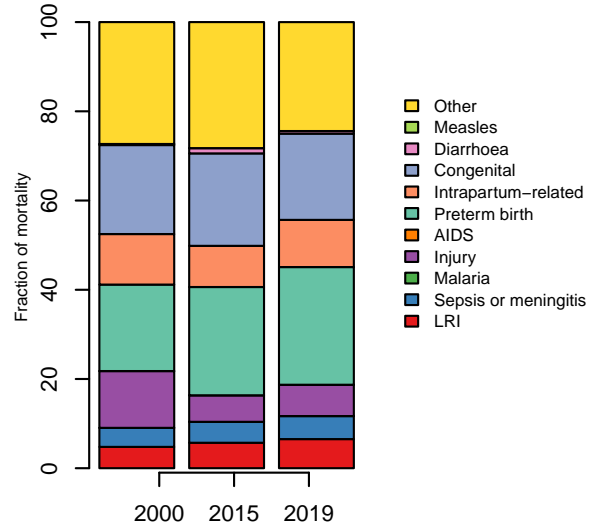

### Czechia (Neonatal)

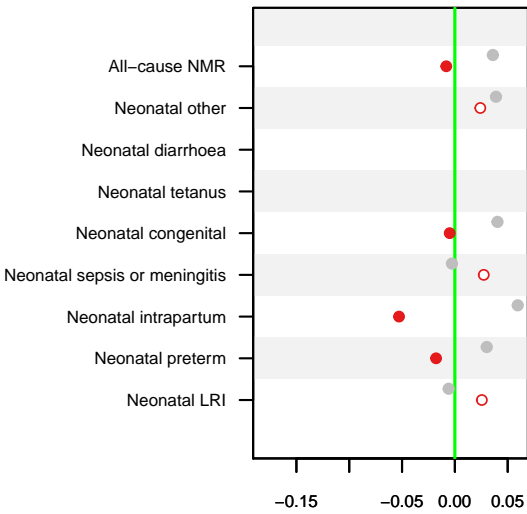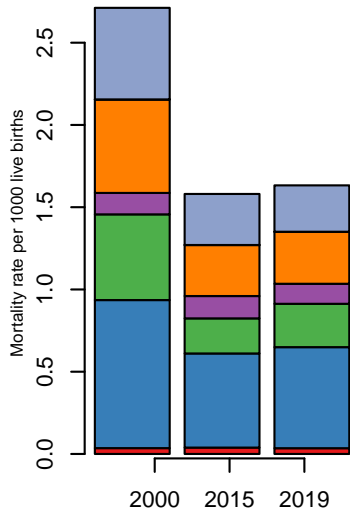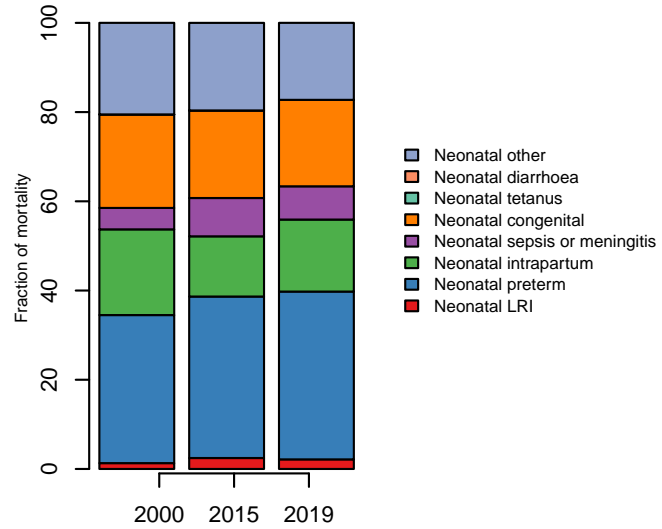

● 2000 – 2015      ● 2015 – 2019 (not on target)      → Deficit to target      ○ 2015 – 2019 (on target)

### Germany (Under five)

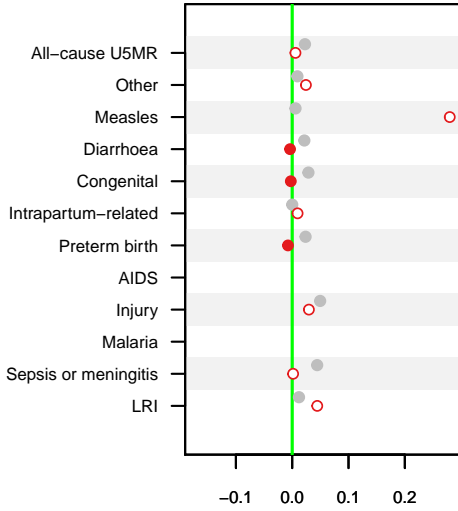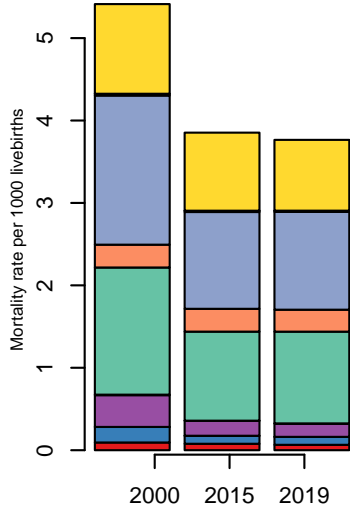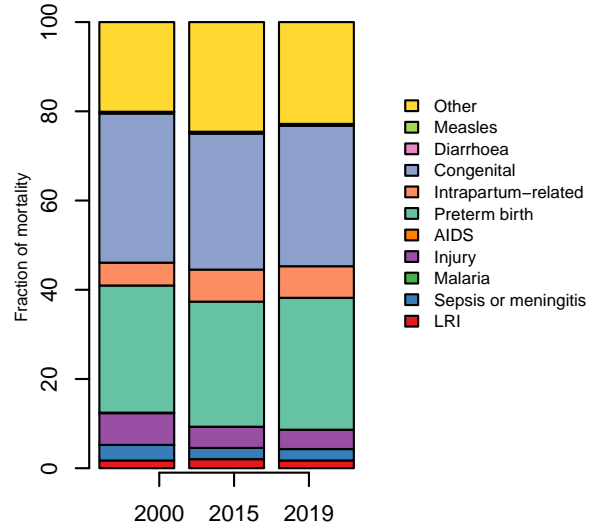

### Germany (Neonatal)

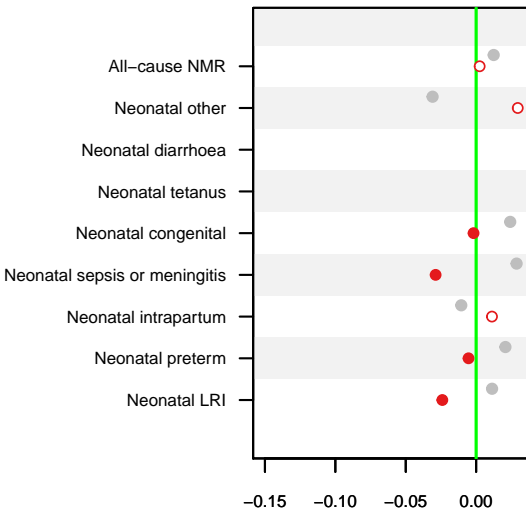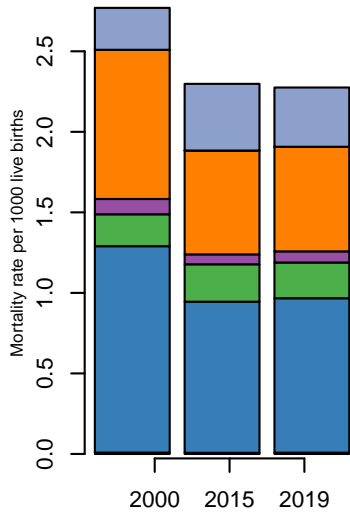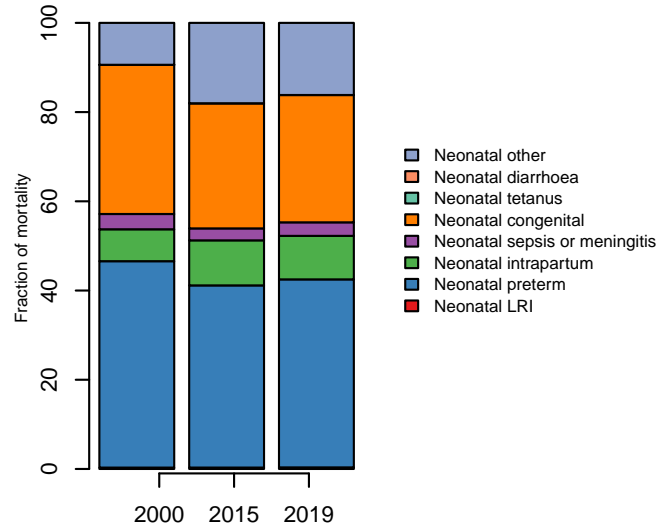

● 2000 – 2015      ● 2015 – 2019 (not on target)      → Deficit to target      ○ 2015 – 2019 (on target)

### Djibouti (Under five)

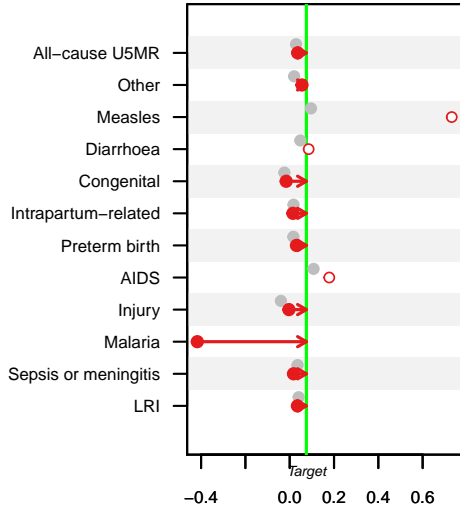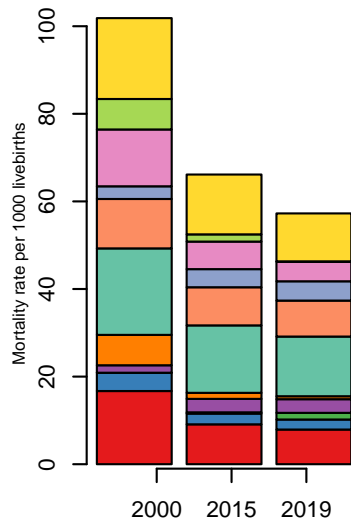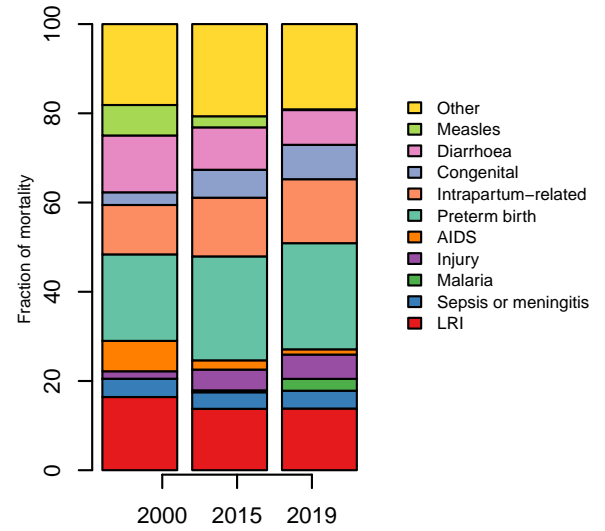

### Djibouti (Neonatal)

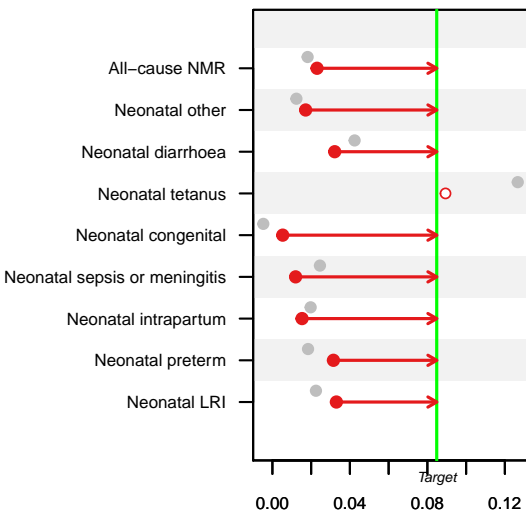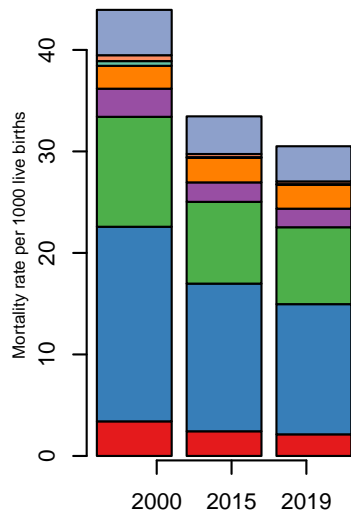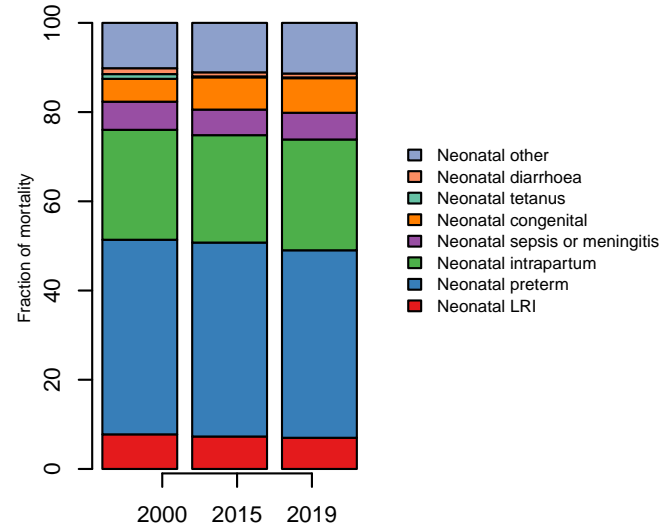

● 2000 – 2015      ● 2015 – 2019 (not on target)      → Deficit to target      ○ 2015 – 2019 (on target)

### Denmark (Under five)

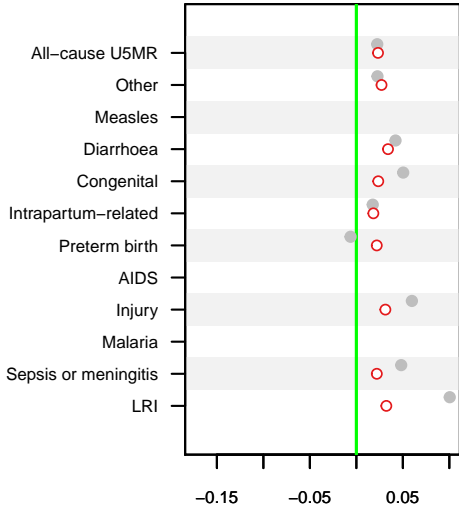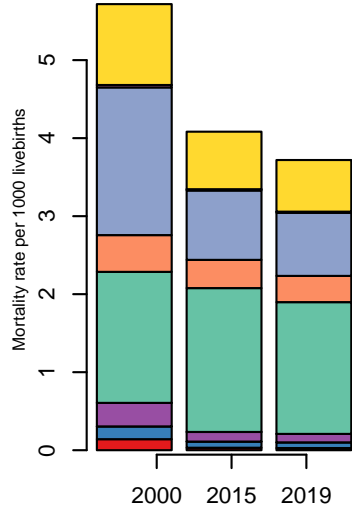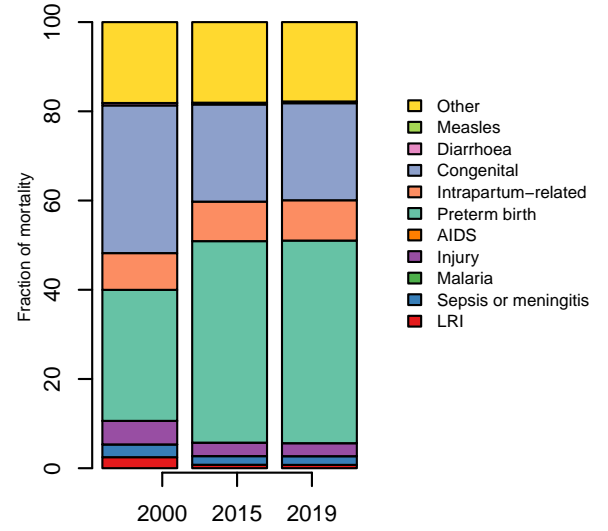

### Denmark (Neonatal)

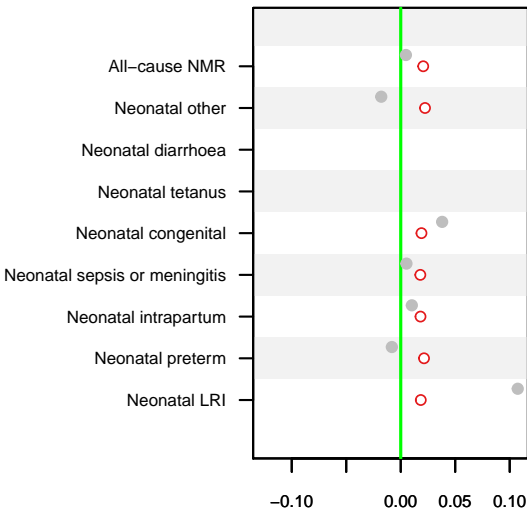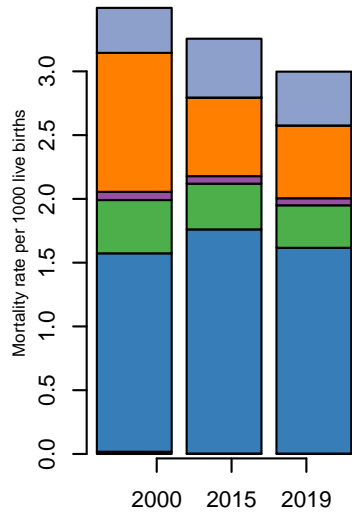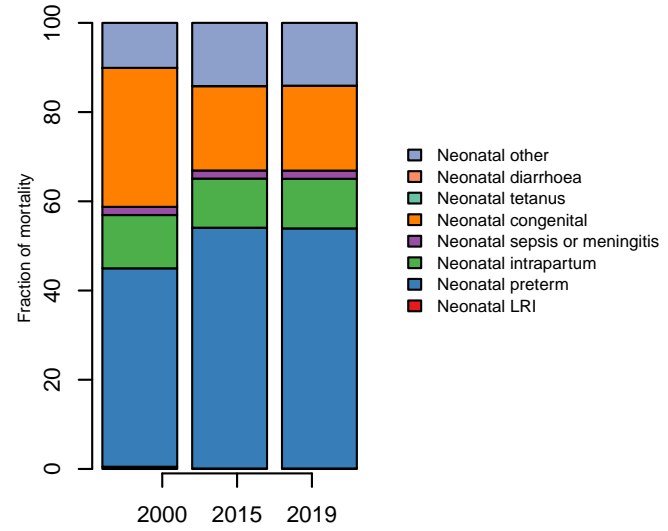

● 2000 – 2015      ● 2015 – 2019 (not on target)      → Deficit to target      ○ 2015 – 2019 (on target)

### Dominican Republic (Under five)

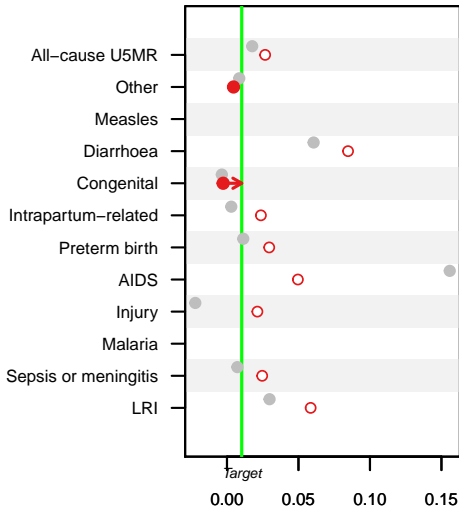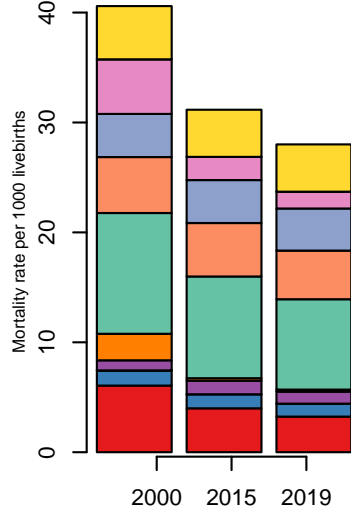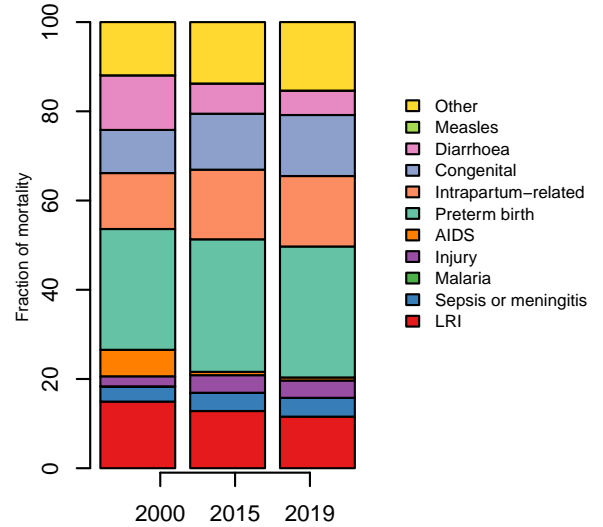

### Dominican Republic (Neonatal)

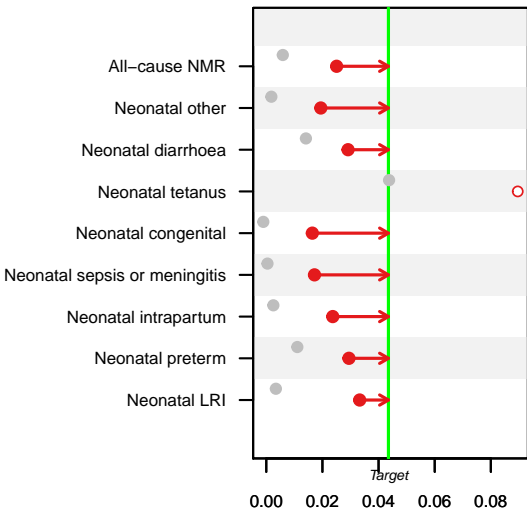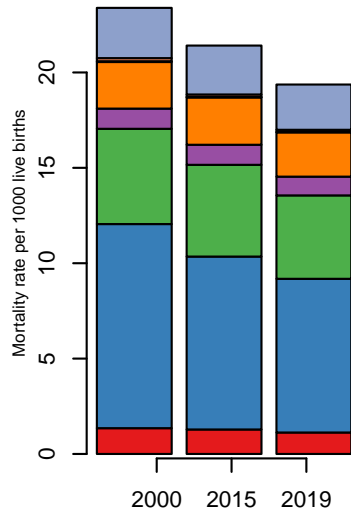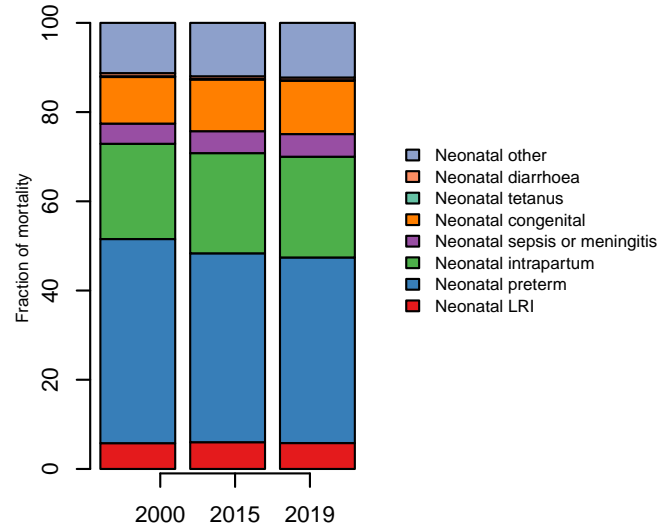

● 2000 – 2015      ● 2015 – 2019 (not on target)      → Deficit to target      ○ 2015 – 2019 (on target)

### Algeria (Under five)

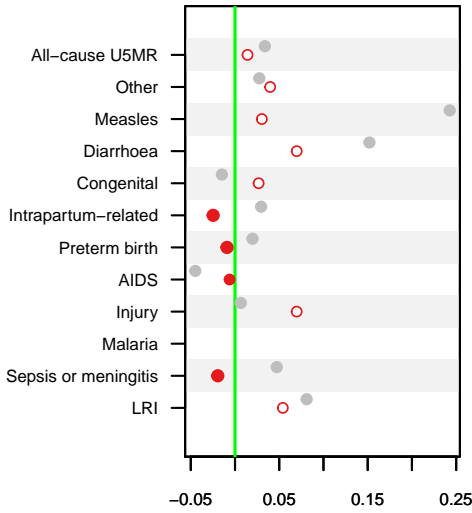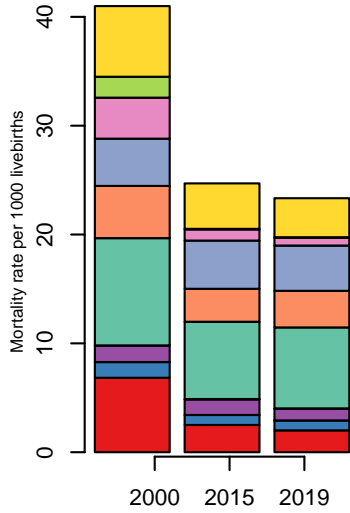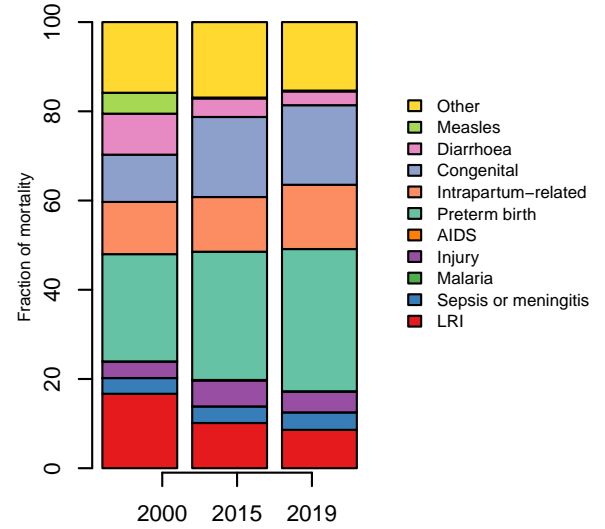

### Algeria (Neonatal)

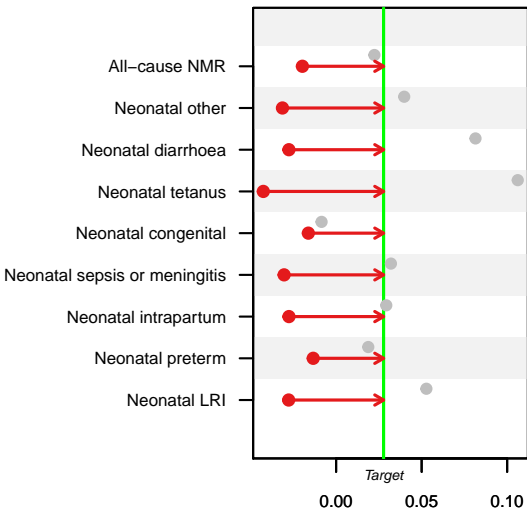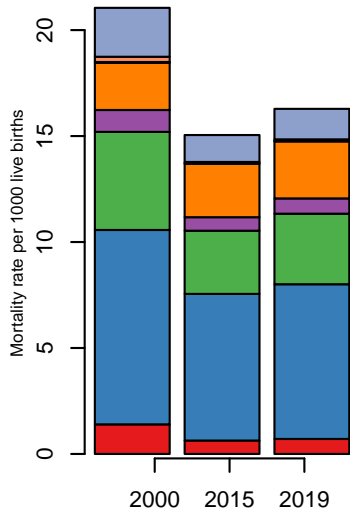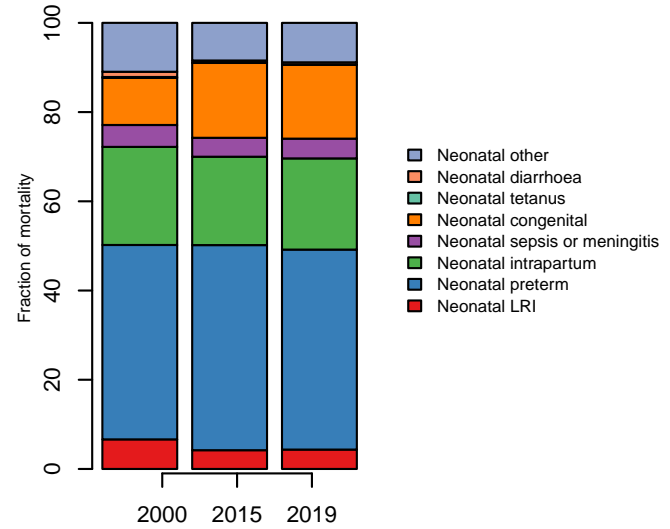

● 2000 – 2015      ● 2015 – 2019 (not on target)      → Deficit to target      ○ 2015 – 2019 (on target)

### Ecuador (Under five)

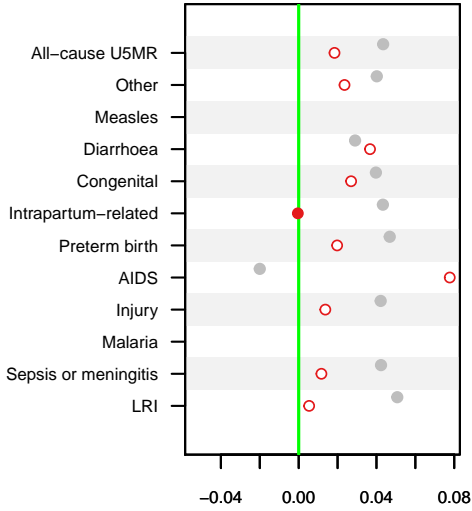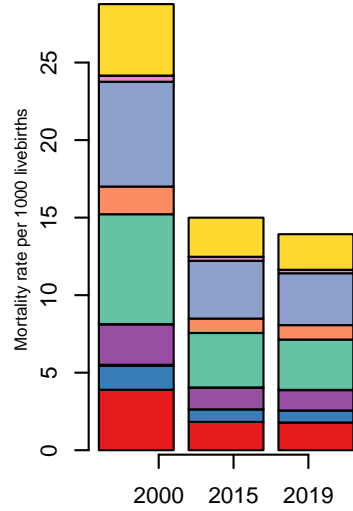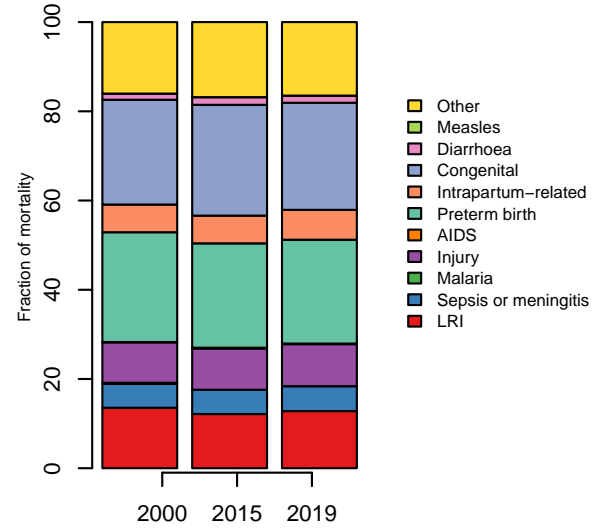

### Ecuador (Neonatal)

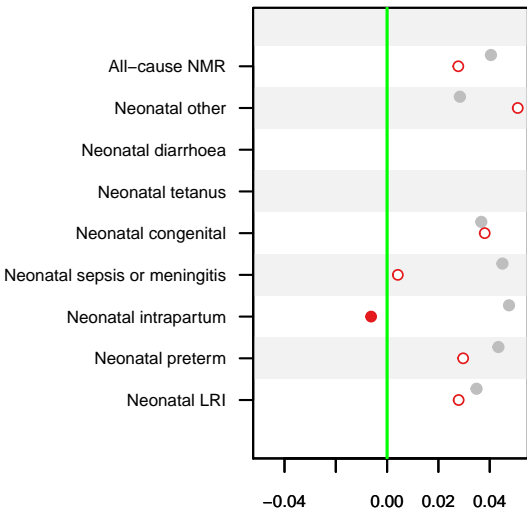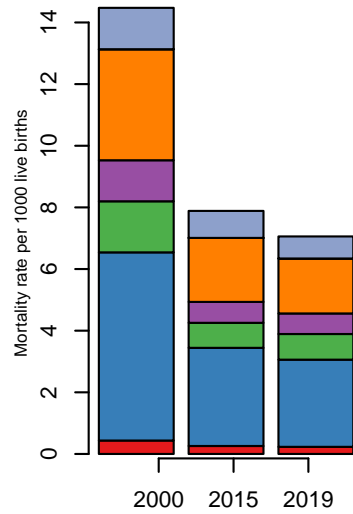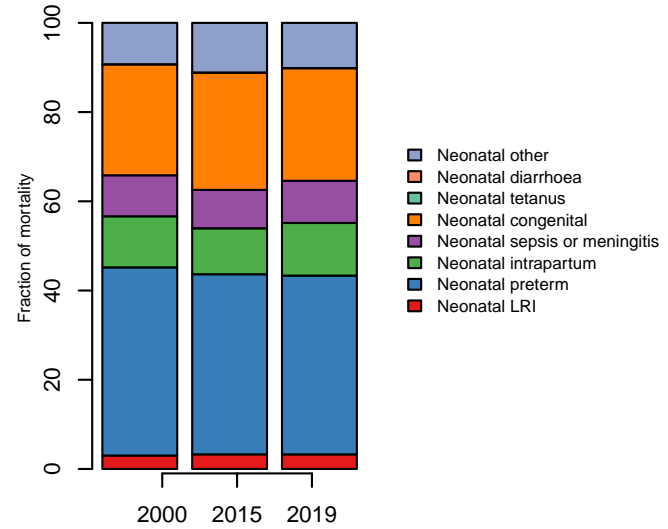

● 2000 – 2015      ● 2015 – 2019 (not on target)      → Deficit to target      ○ 2015 – 2019 (on target)



### Egypt (Under five)

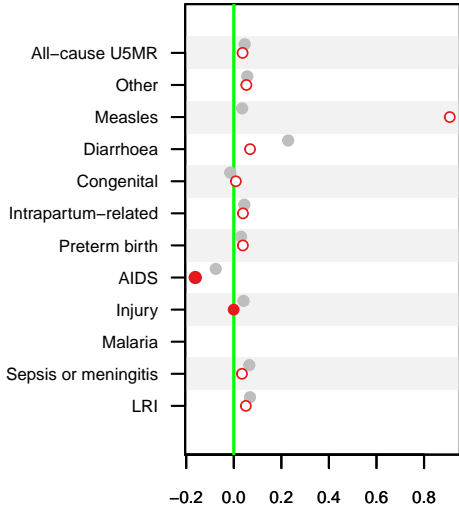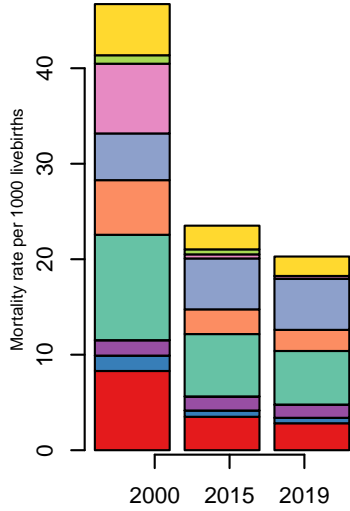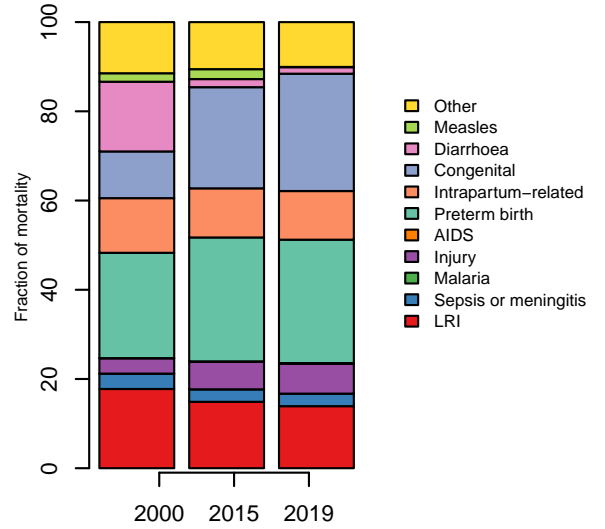

### Egypt (Neonatal)

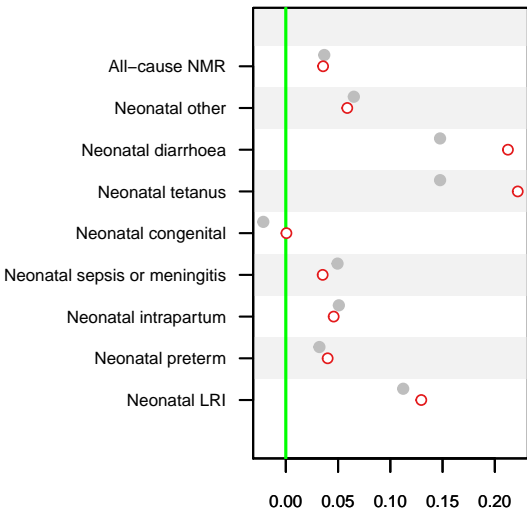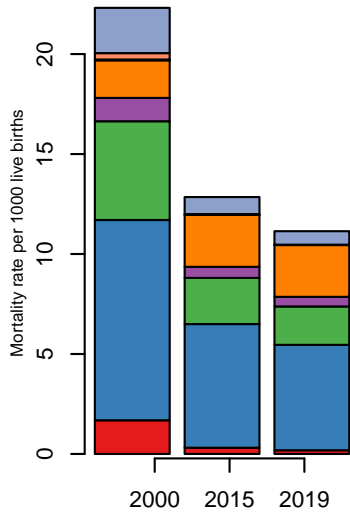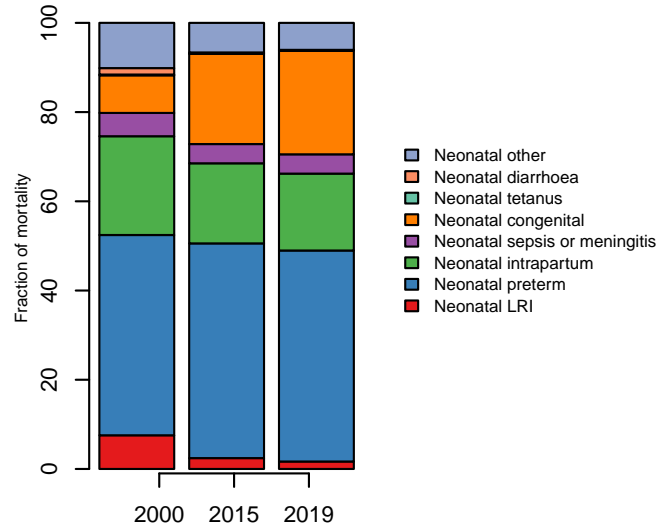

● 2000 – 2015      ● 2015 – 2019 (not on target)      → Deficit to target      ○ 2015 – 2019 (on target)

### Eritrea (Under five)

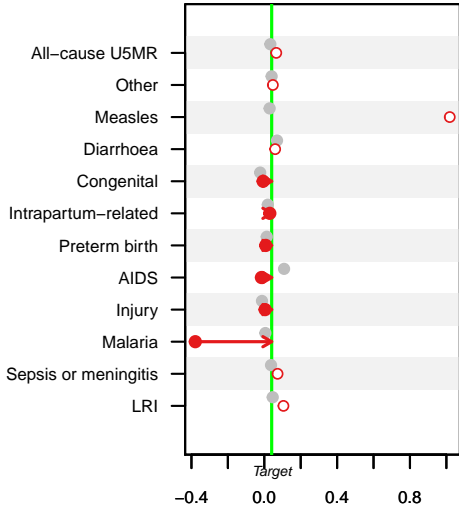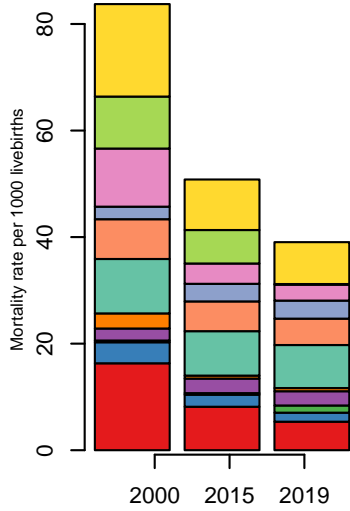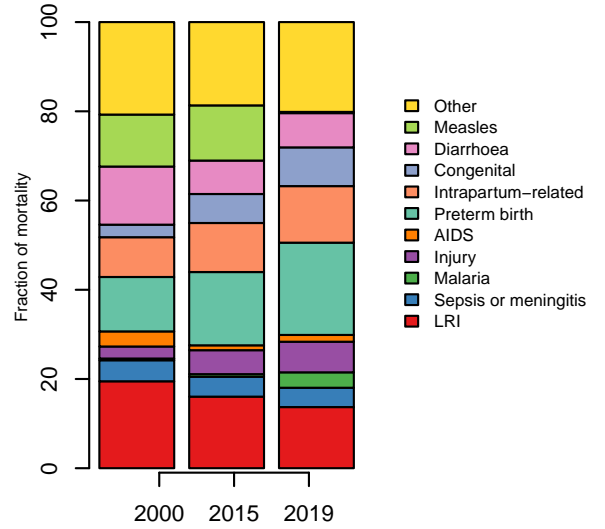

### Eritrea (Neonatal)

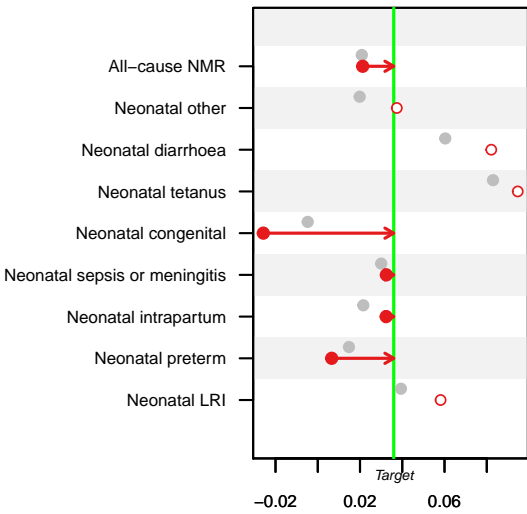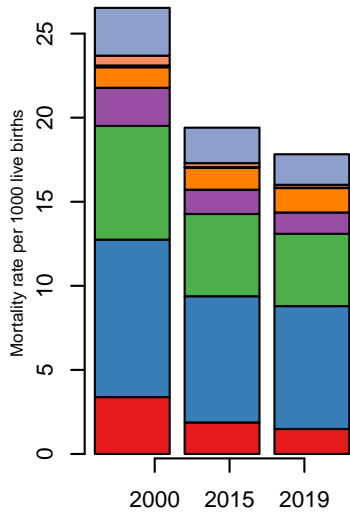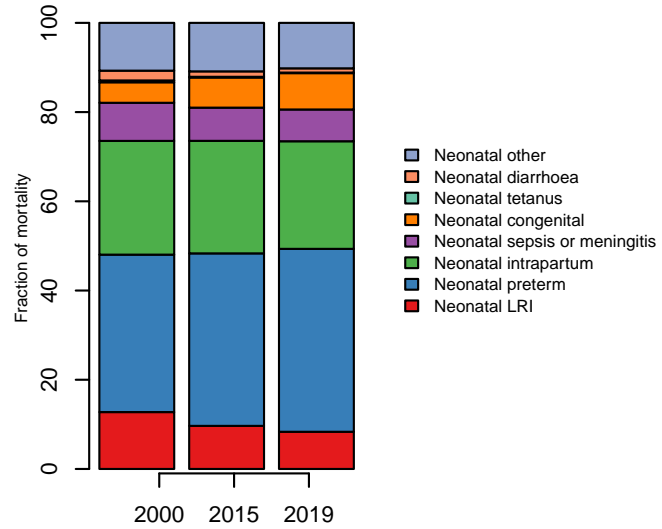

● 2000 – 2015      ● 2015 – 2019 (not on target)      → Deficit to target      ○ 2015 – 2019 (on target)

### Spain (Under five)

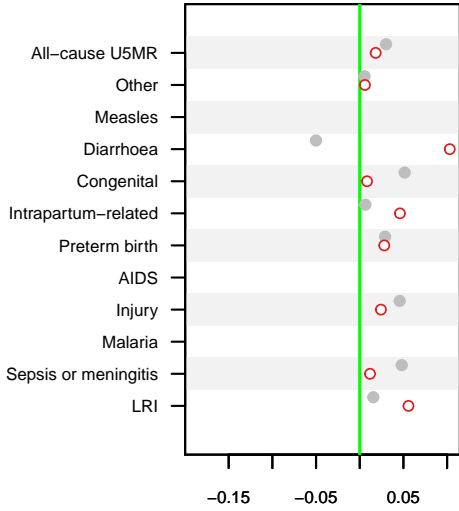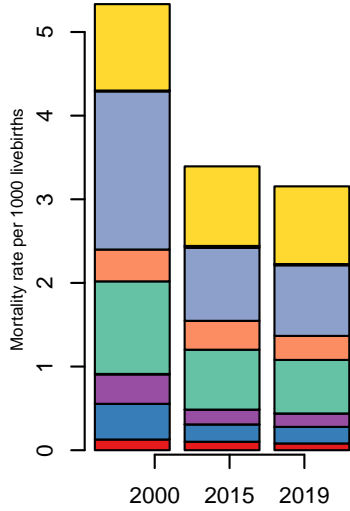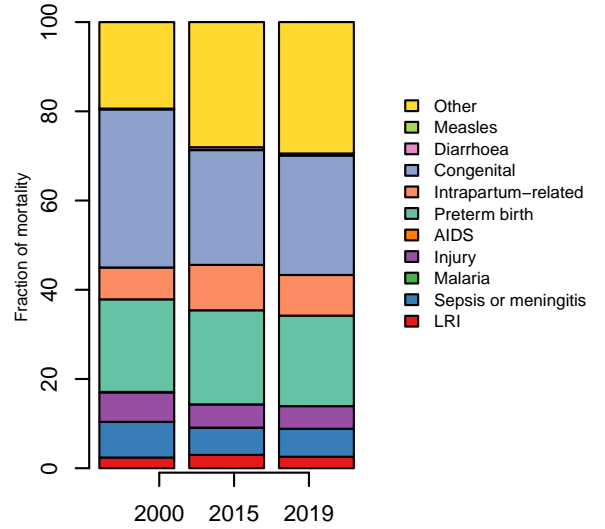

### Spain (Neonatal)

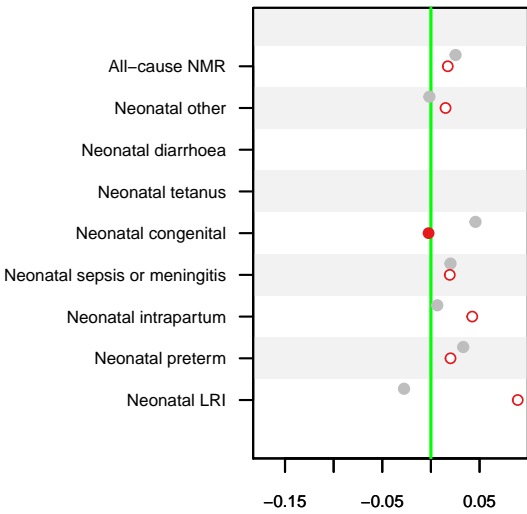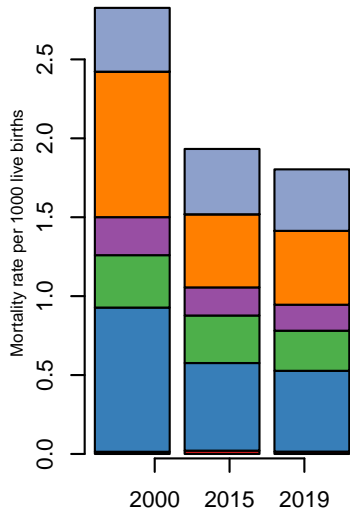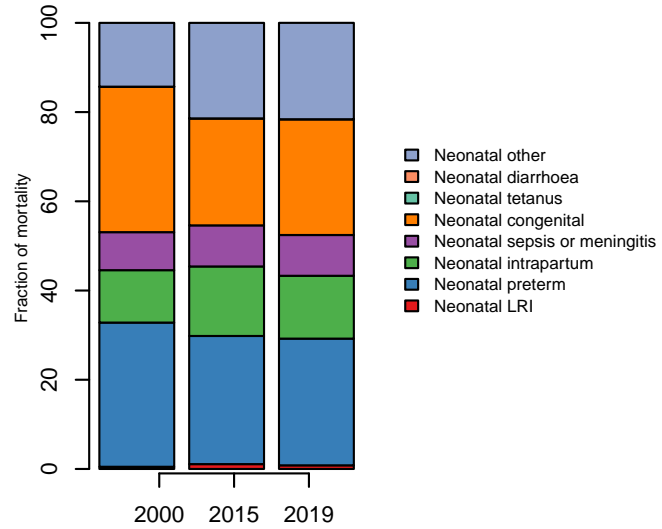

● 2000 – 2015      ● 2015 – 2019 (not on target)      → Deficit to target      ○ 2015 – 2019 (on target)

### Ethiopia (Under five)

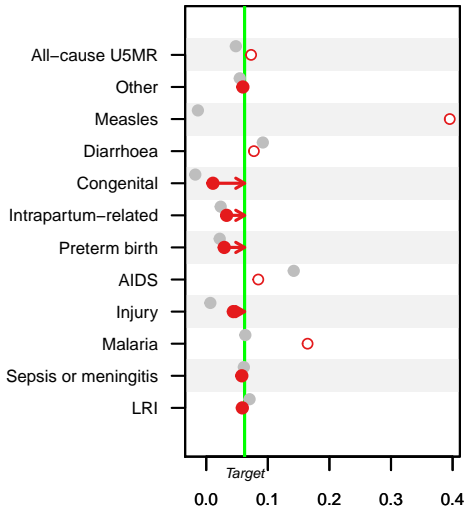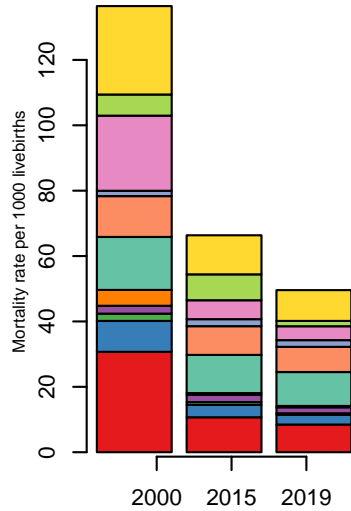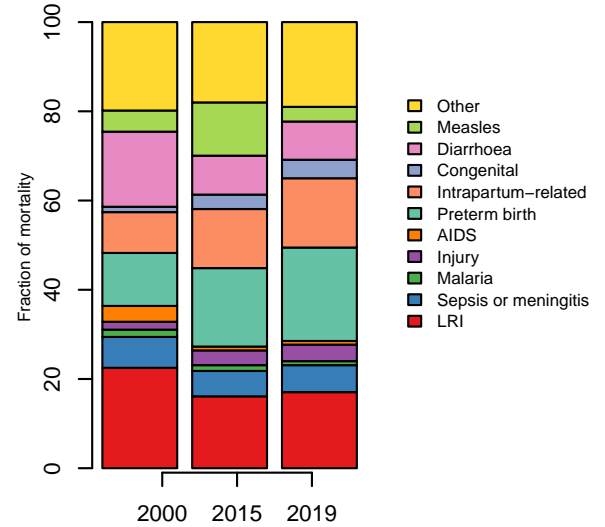

### Ethiopia (Neonatal)

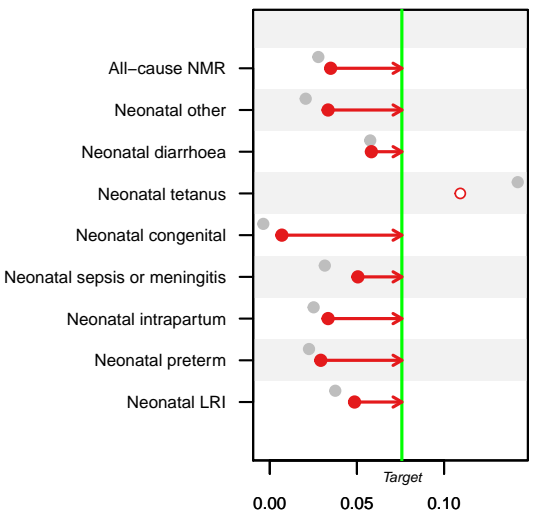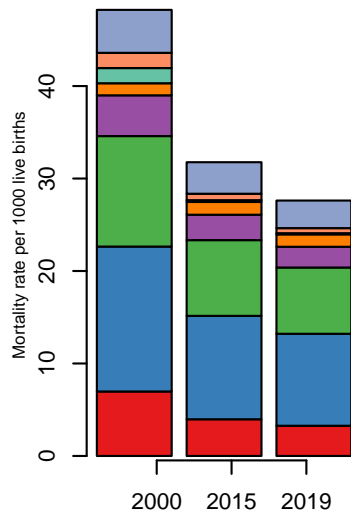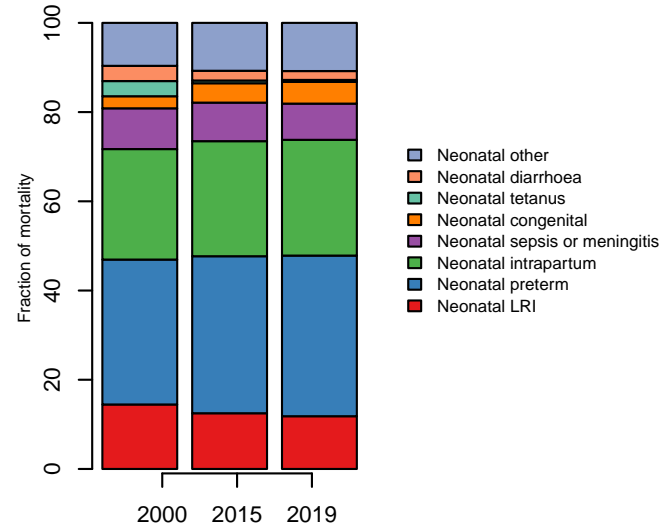

● 2000 – 2015

● 2015 – 2019 (not on target)

→ Deficit to target

○ 2015 – 2019 (on target)

### Finland (Under five)

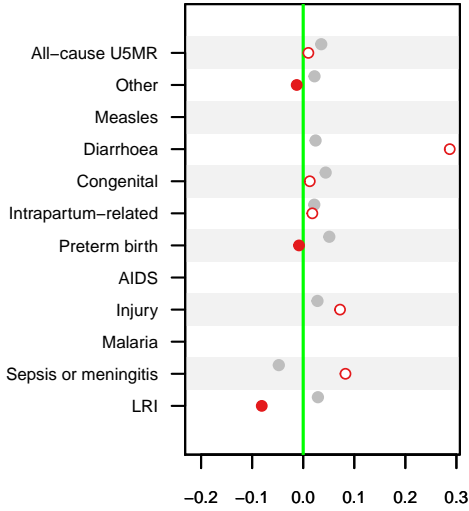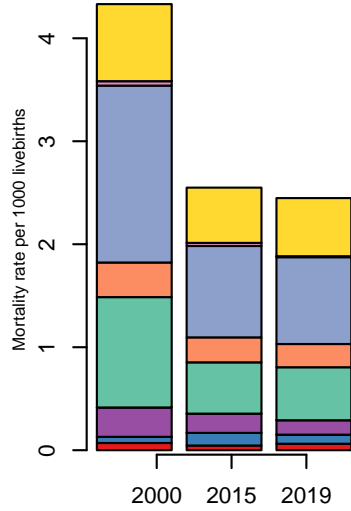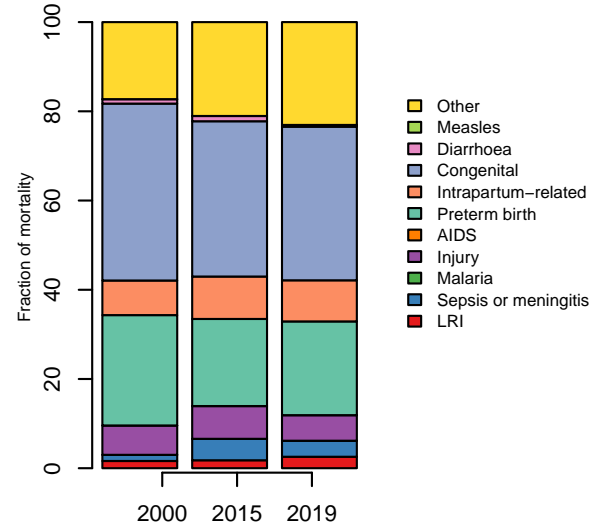

### Finland (Neonatal)

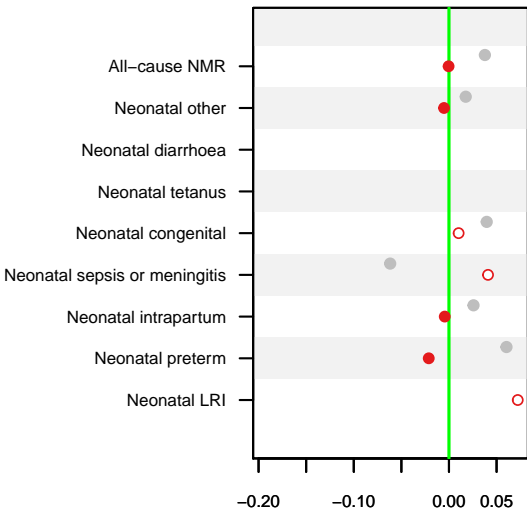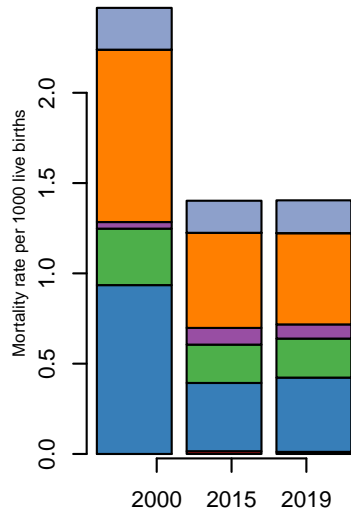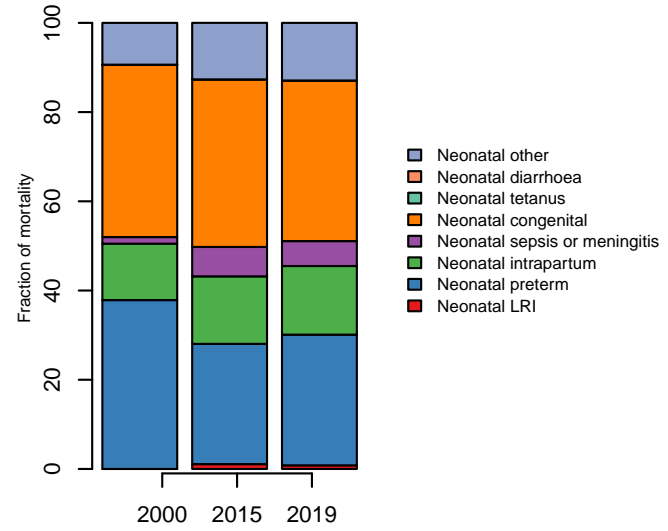

● 2000 – 2015      ● 2015 – 2019 (not on target)      → Deficit to target      ○ 2015 – 2019 (on target)

### Fiji (Under five)

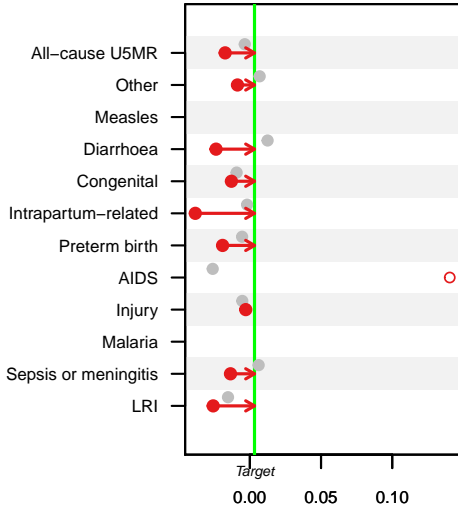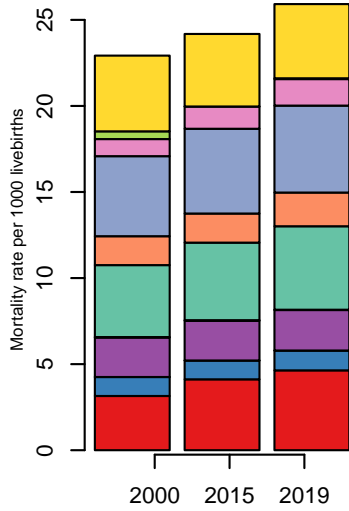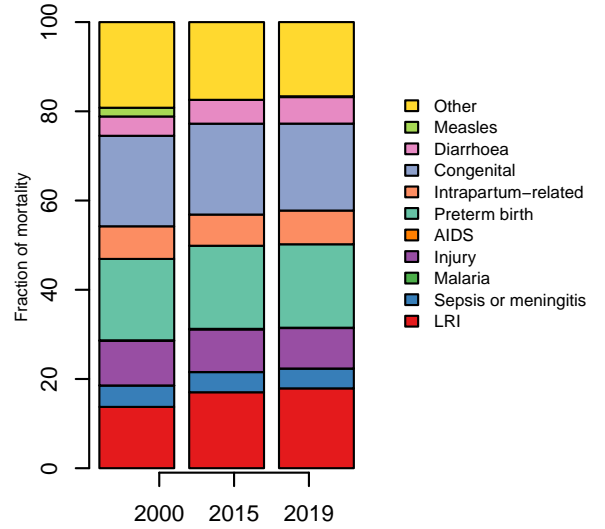

### Fiji (Neonatal)

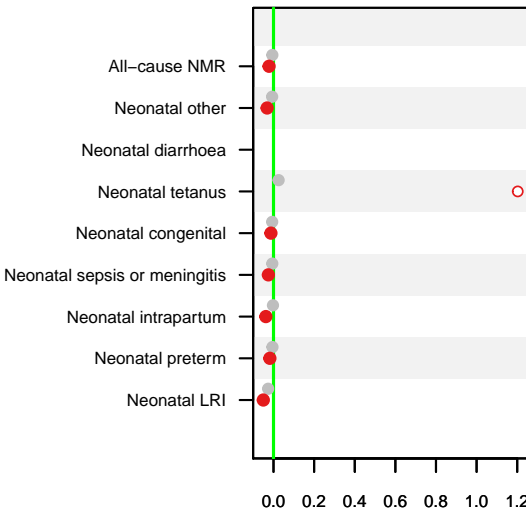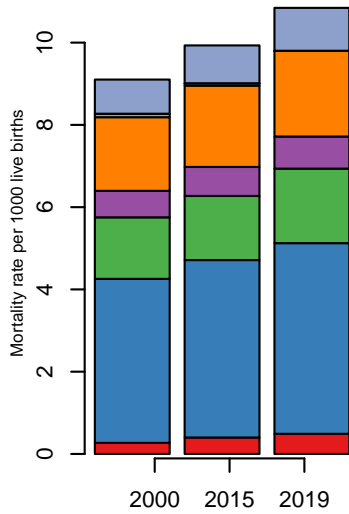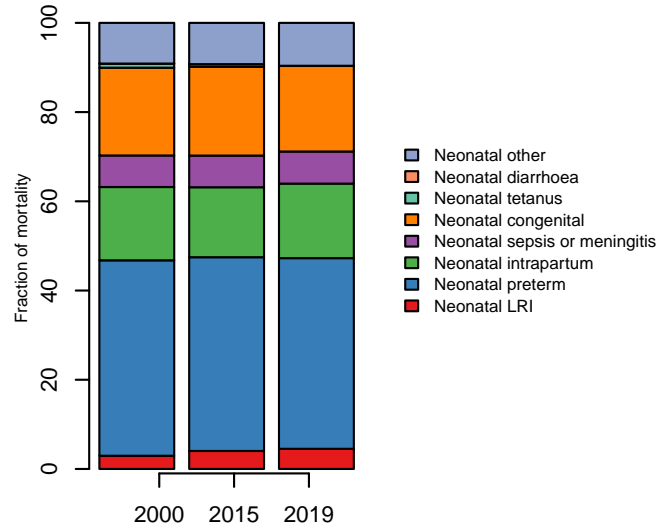

● 2000 – 2015      ● 2015 – 2019 (not on target)      → Deficit to target      ○ 2015 – 2019 (on target)

### France (Under five)

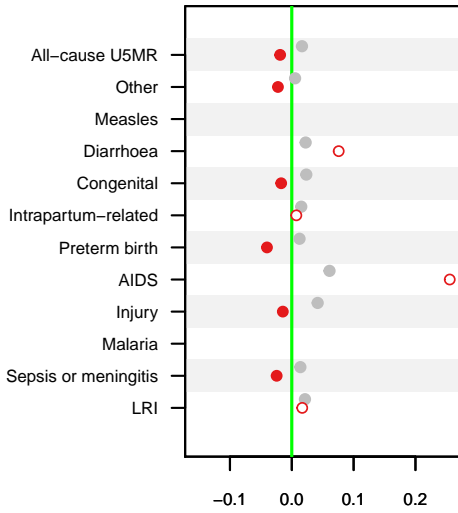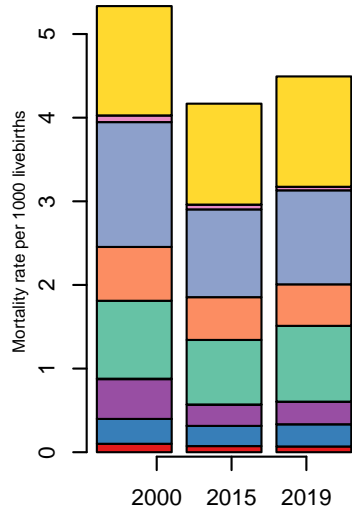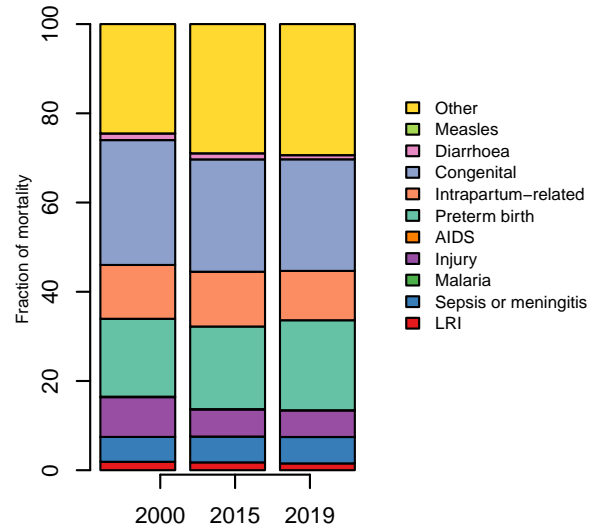

### France (Neonatal)

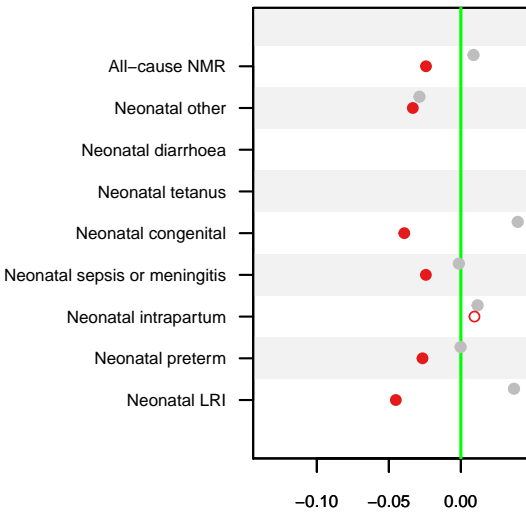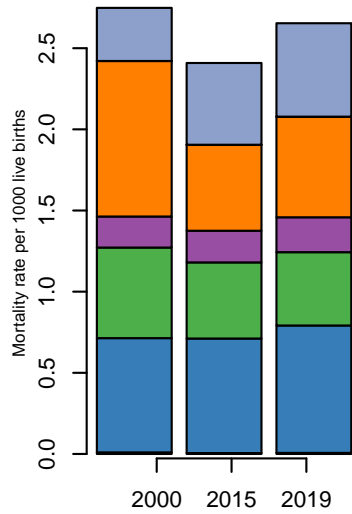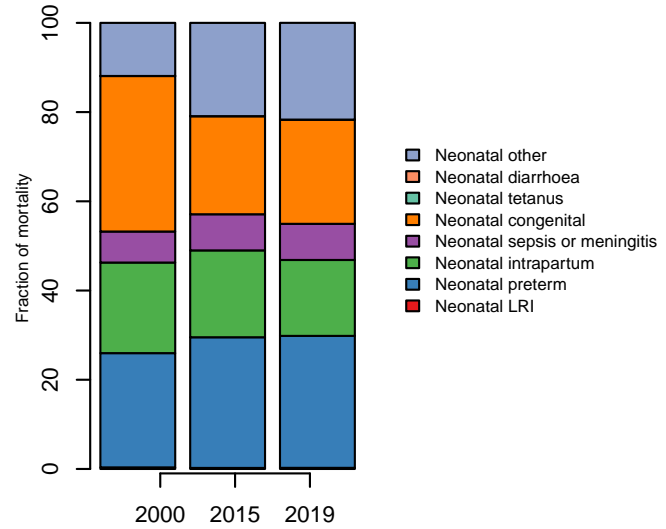

● 2000 – 2015      ● 2015 – 2019 (not on target)      → Deficit to target      ○ 2015 – 2019 (on target)

### Micronesia (Federated States of) (Under five)

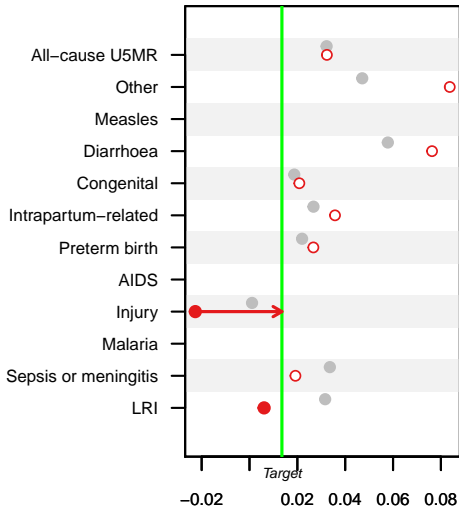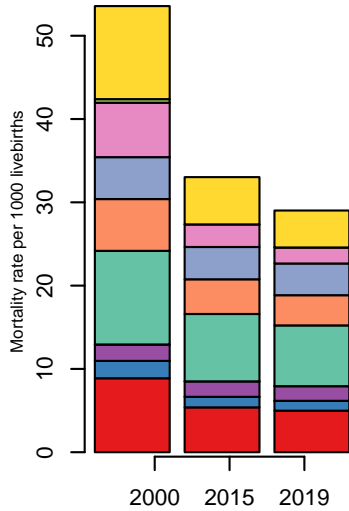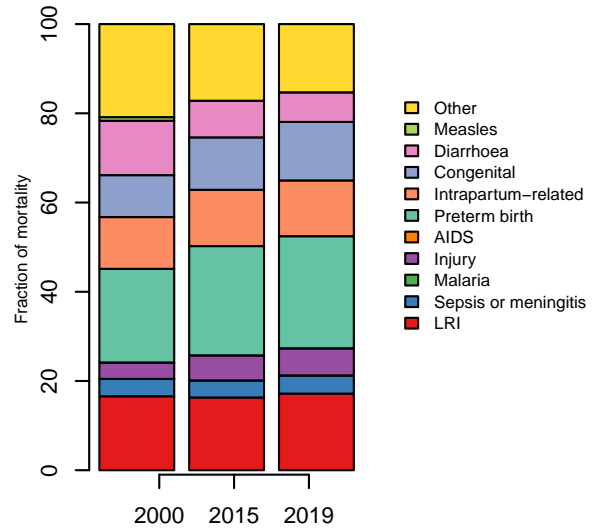

### Micronesia (Federated States of) (Neonatal)

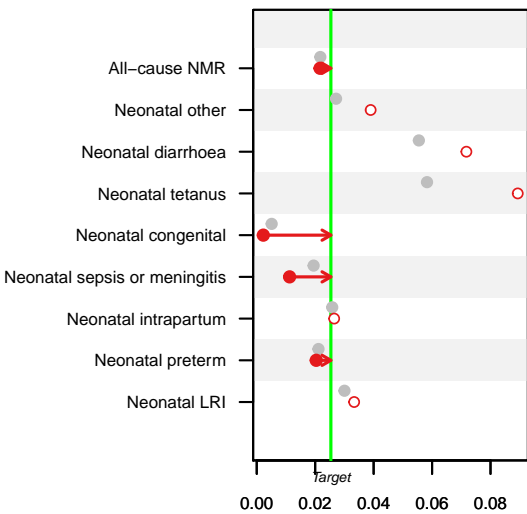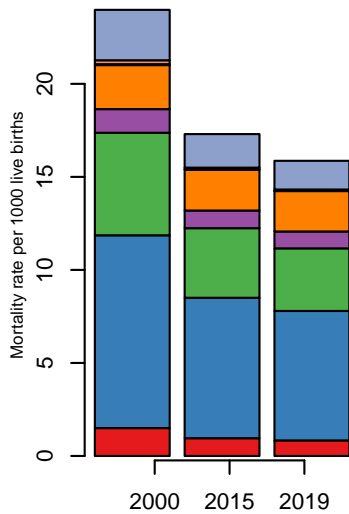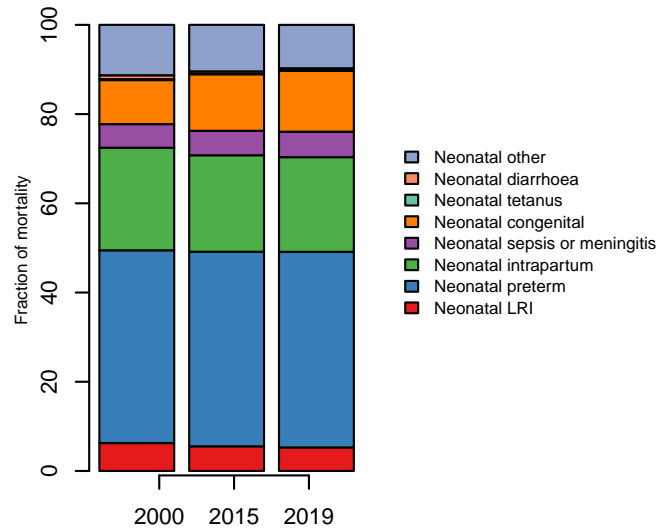

● 2000 – 2015      ● 2015 – 2019 (not on target)      → Deficit to target      ○ 2015 – 2019 (on target)



### Gabon (Under five)

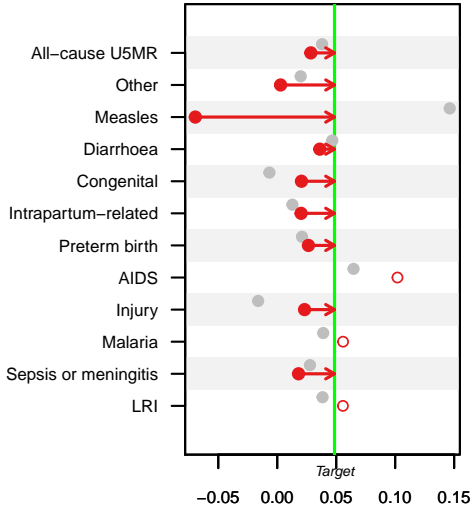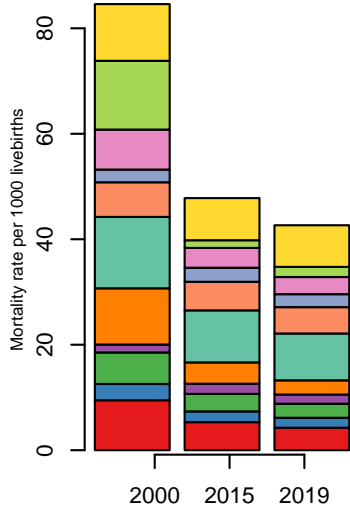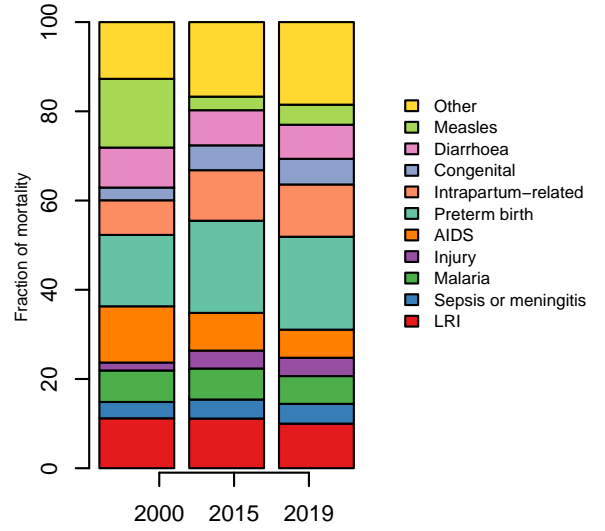

### Gabon (Neonatal)

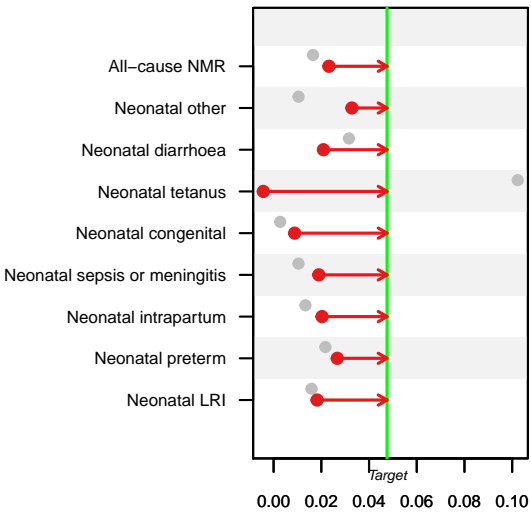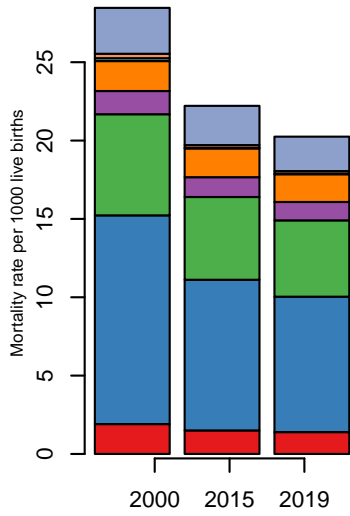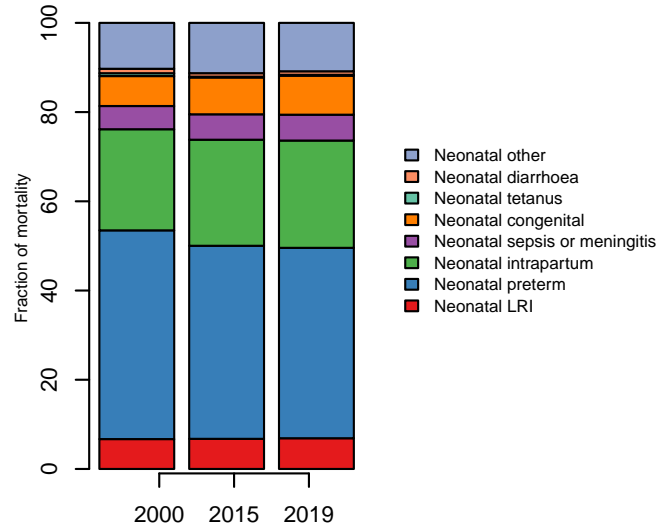

● 2000 – 2015      ● 2015 – 2019 (not on target)      → Deficit to target      ○ 2015 – 2019 (on target)

### United Kingdom of Great Britain and Northern Ireland (Under five)

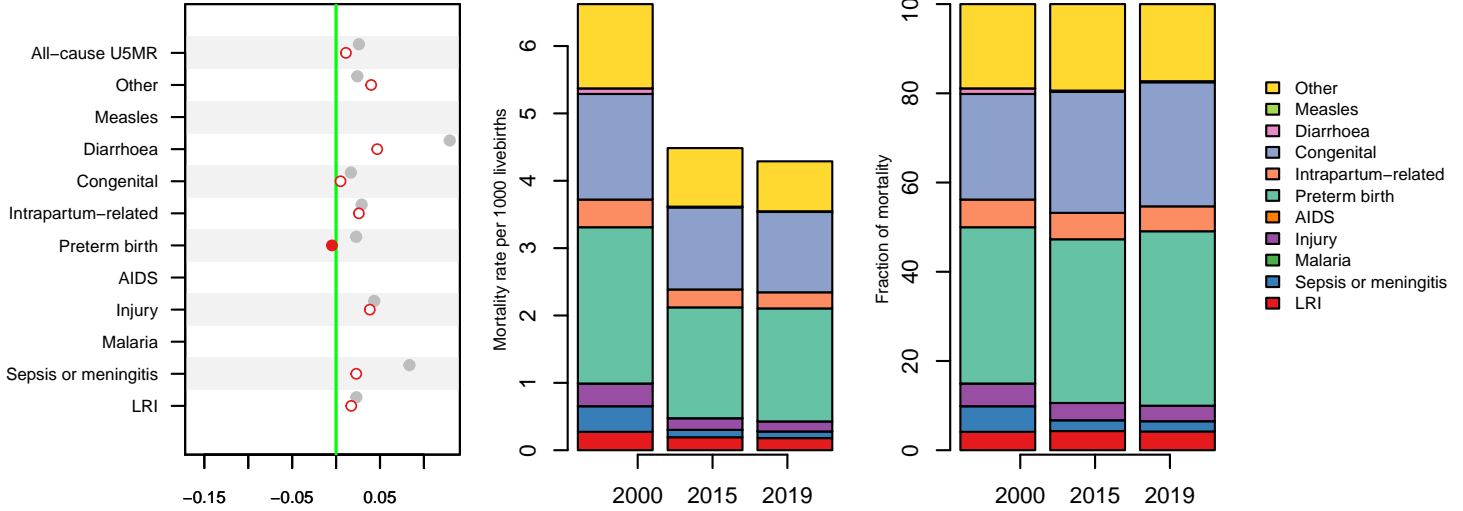

### United Kingdom of Great Britain and Northern Ireland (Neonatal)

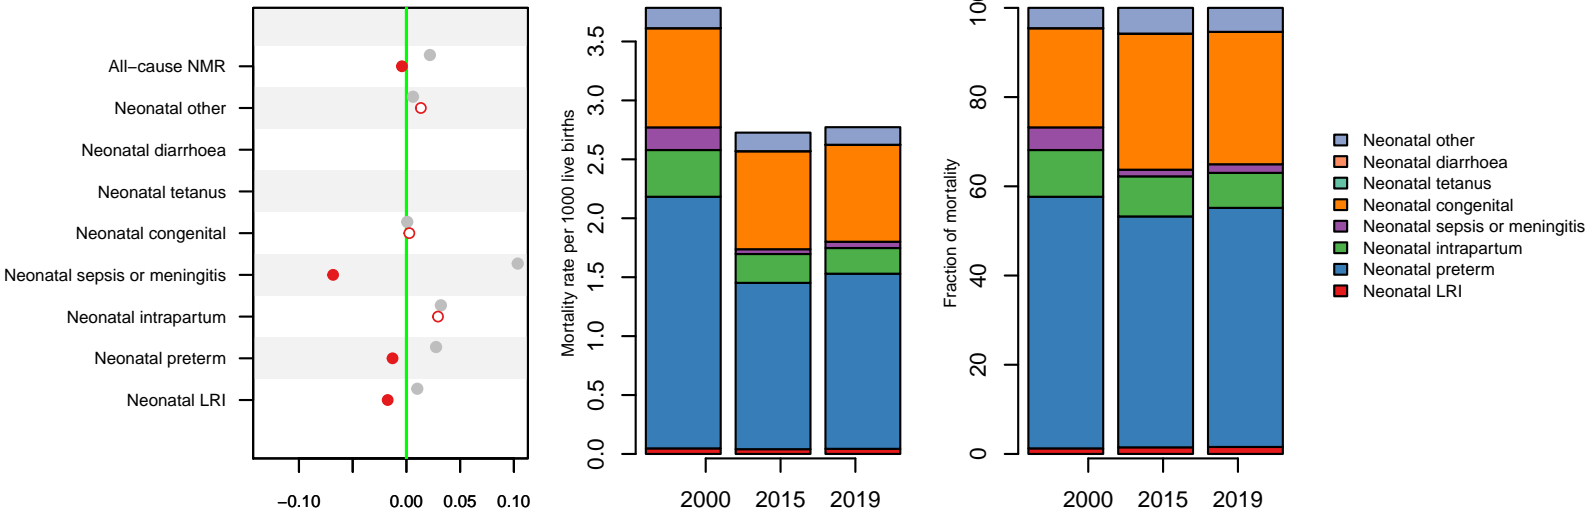

● 2000 – 2015      ● 2015 – 2019 (not on target)      → Deficit to target      ○ 2015 – 2019 (on target)

### Georgia (Under five)

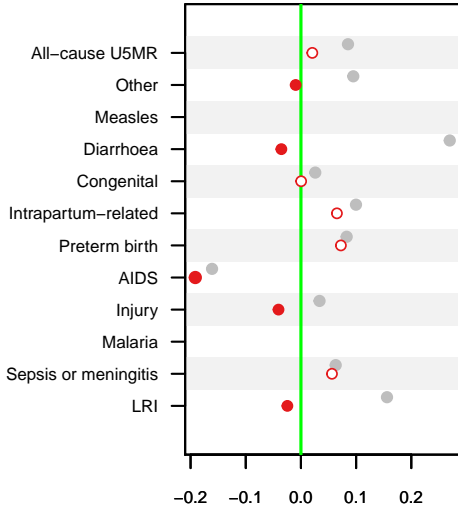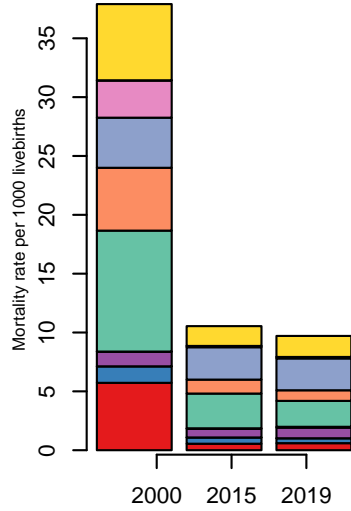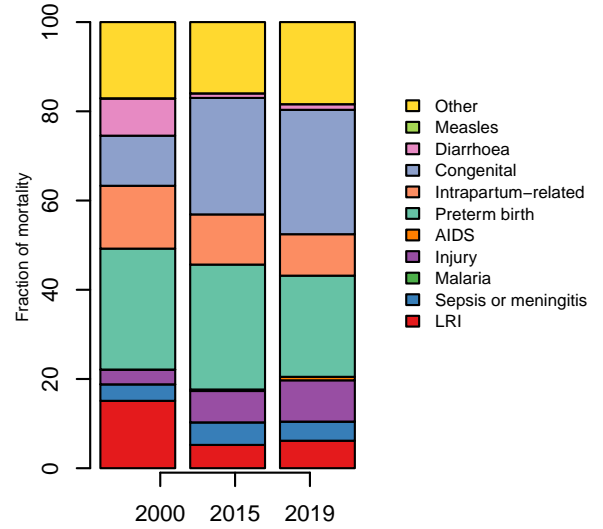

### Georgia (Neonatal)

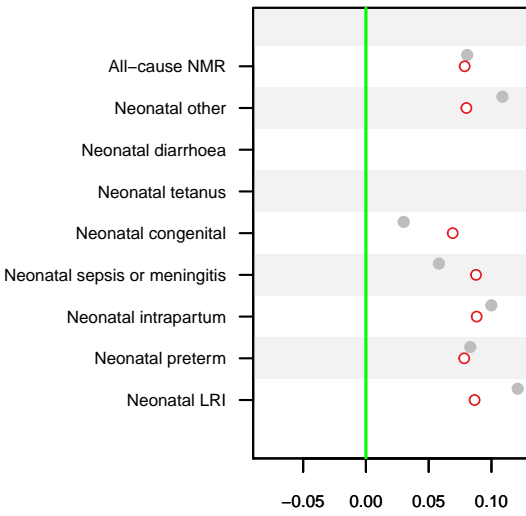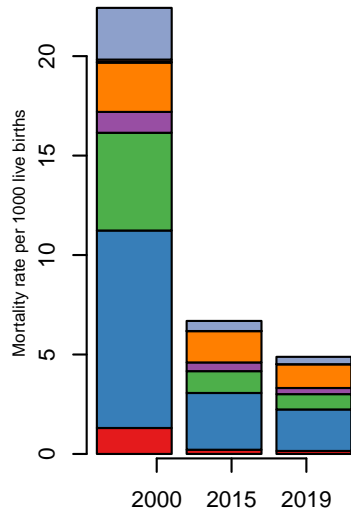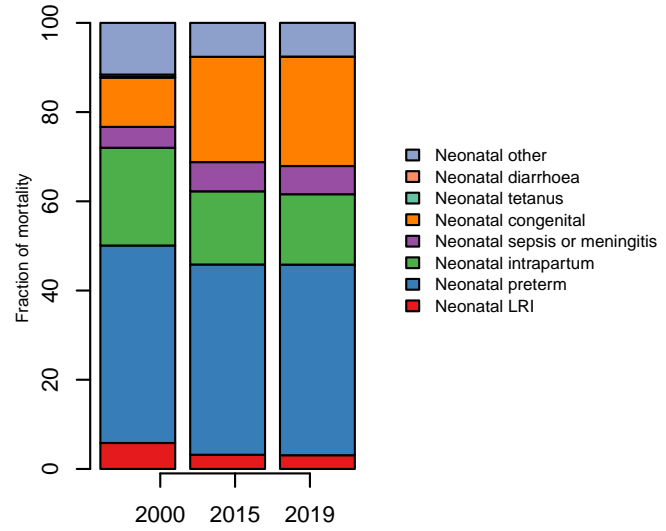

● 2000 – 2015      ● 2015 – 2019 (not on target)      → Deficit to target      ○ 2015 – 2019 (on target)

### Ghana (Under five)

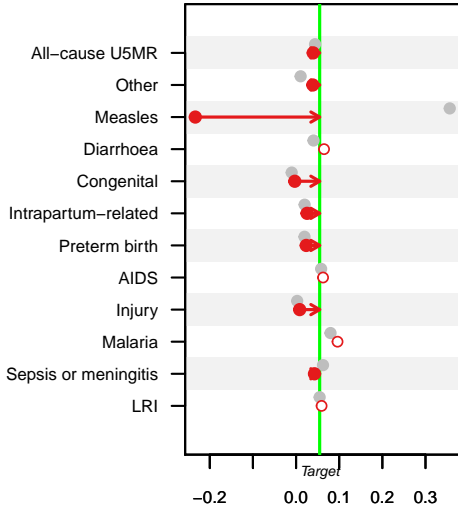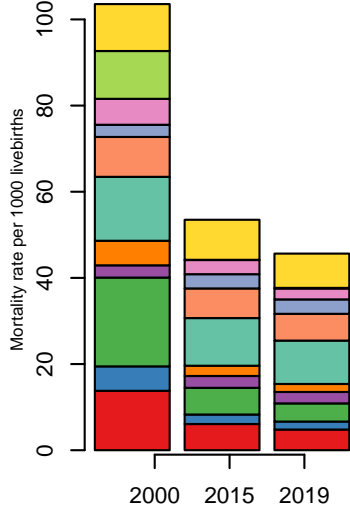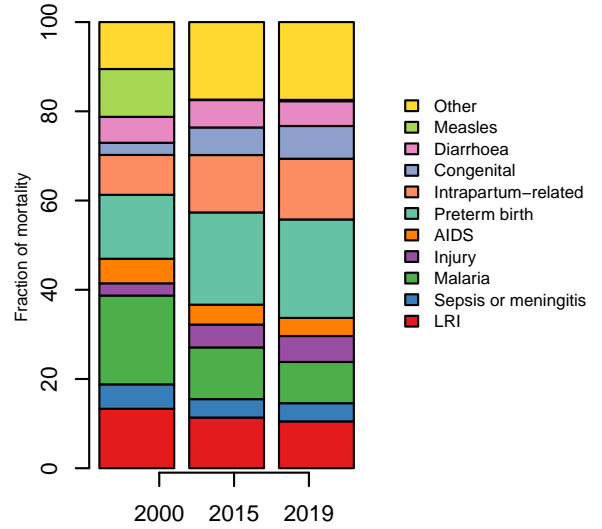

- Other
- Measles
- Diarrhoea
- Congenital
- Intrapartum-related
- Preterm birth
- AIDS
- Injury
- Malaria
- Sepsis or meningitis
- LRI

### Ghana (Neonatal)

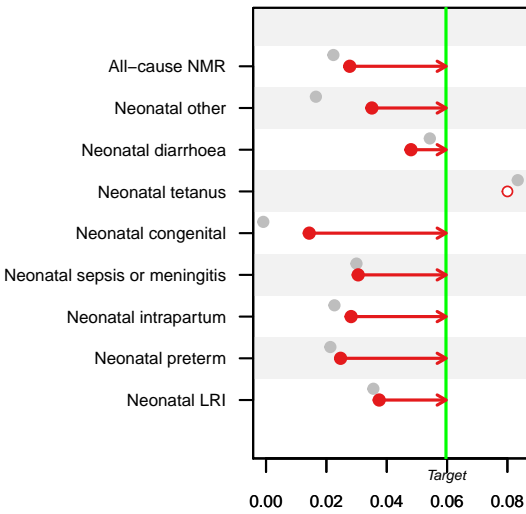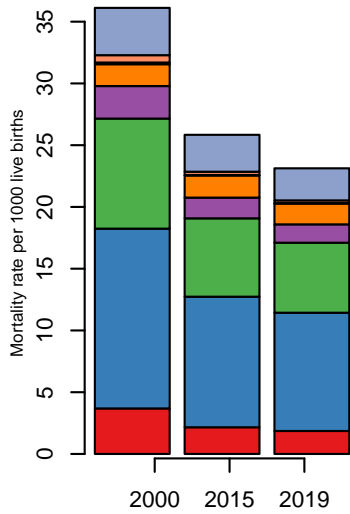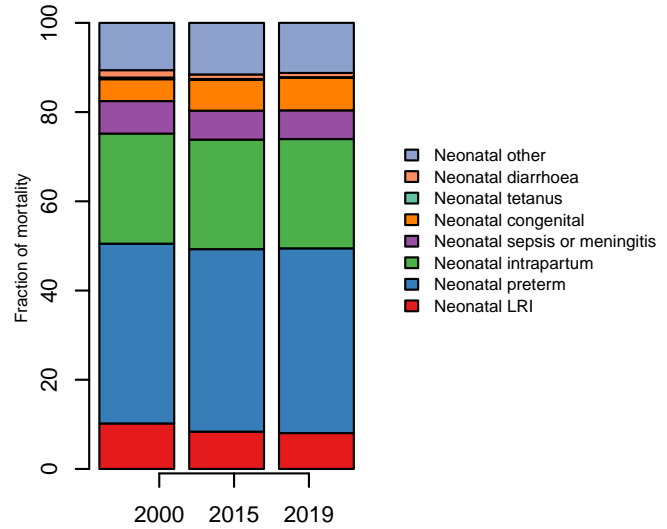

- Neonatal other
- Neonatal diarrhoea
- Neonatal tetanus
- Neonatal congenital
- Neonatal sepsis or meningitis
- Neonatal intrapartum
- Neonatal preterm
- Neonatal LRI

● 2000 – 2015      ● 2015 – 2019 (not on target)      → Deficit to target      ○ 2015 – 2019 (on target)

### Guinea (Under five)

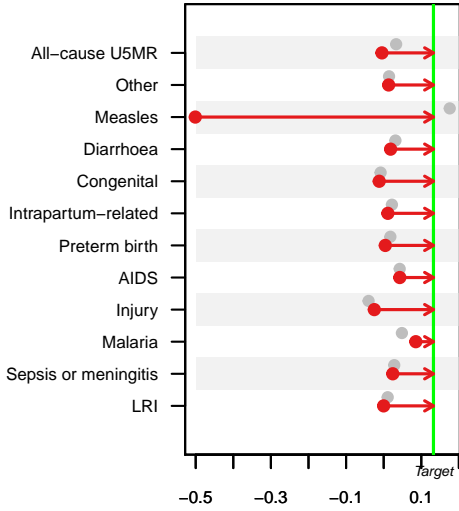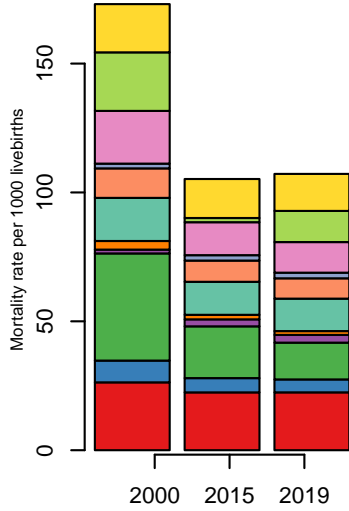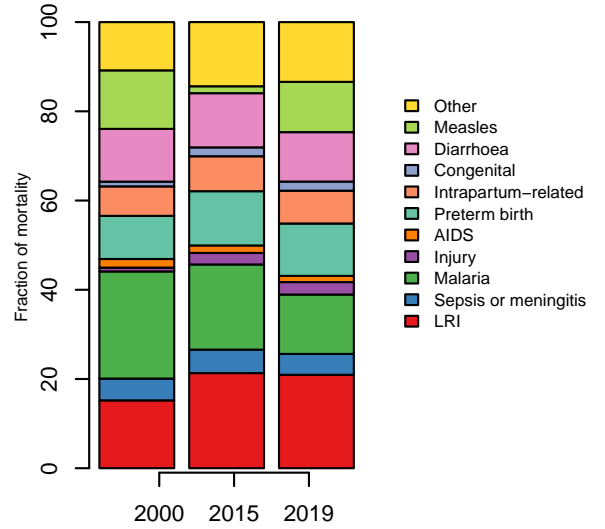

### Guinea (Neonatal)

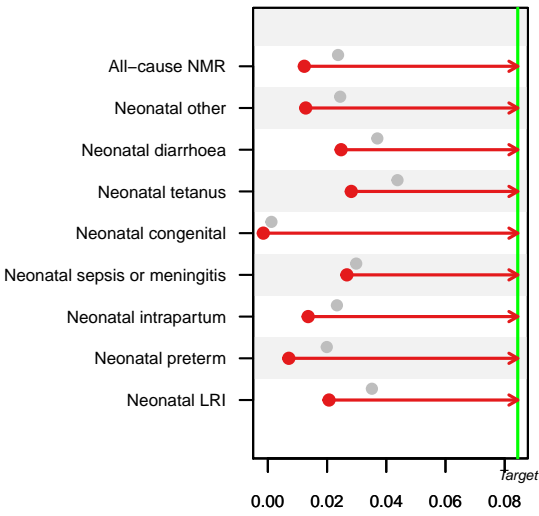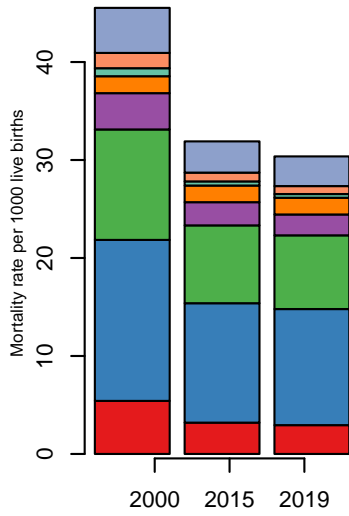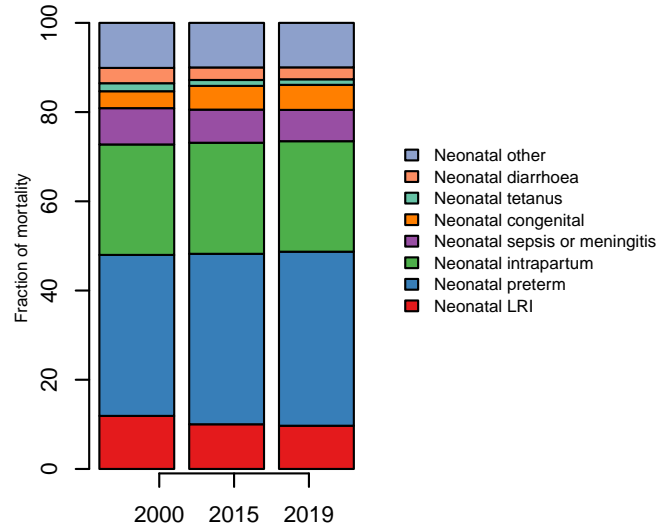

● 2000 – 2015      ● 2015 – 2019 (not on target)      → Deficit to target      ○ 2015 – 2019 (on target)

### Gambia (Under five)

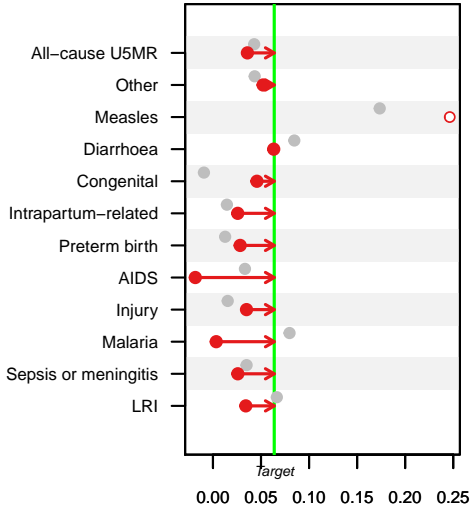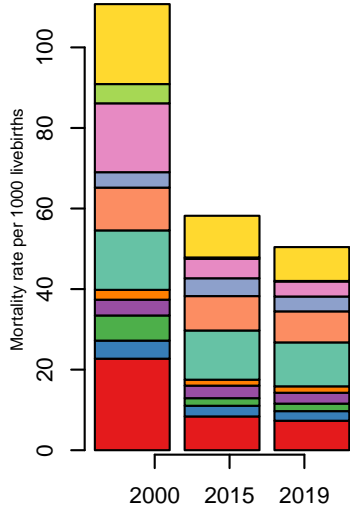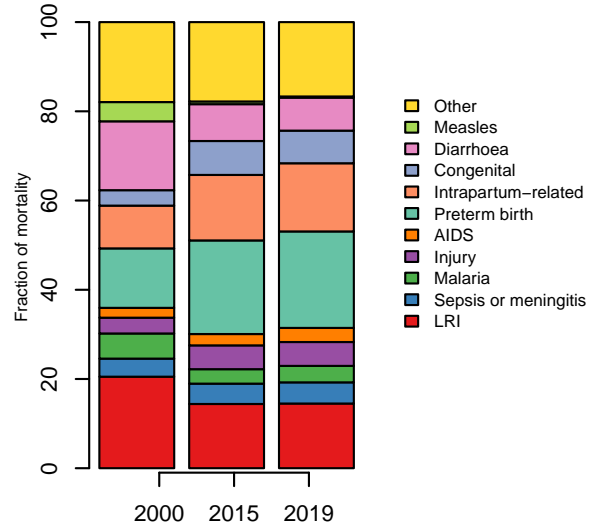

### Gambia (Neonatal)

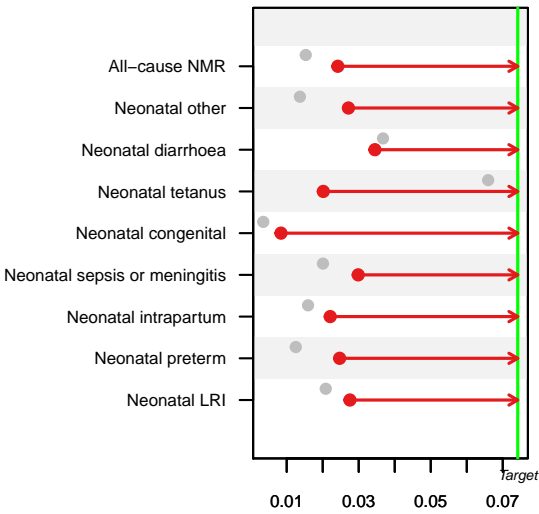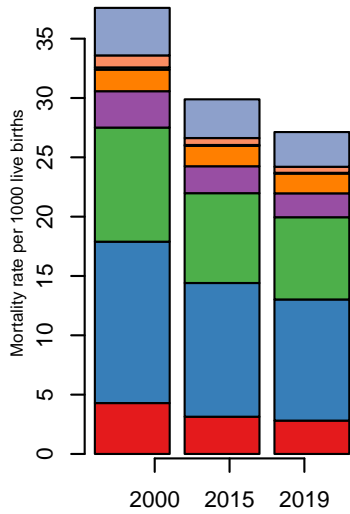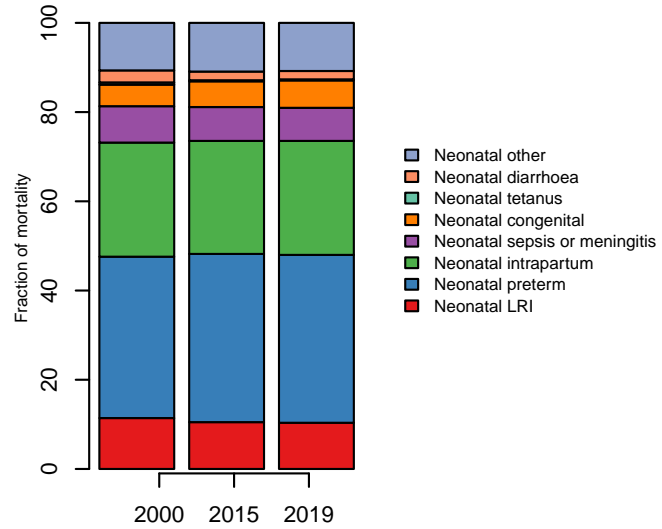

● 2000 – 2015      ● 2015 – 2019 (not on target)      → Deficit to target      ○ 2015 – 2019 (on target)

### Guinea-Bissau (Under five)

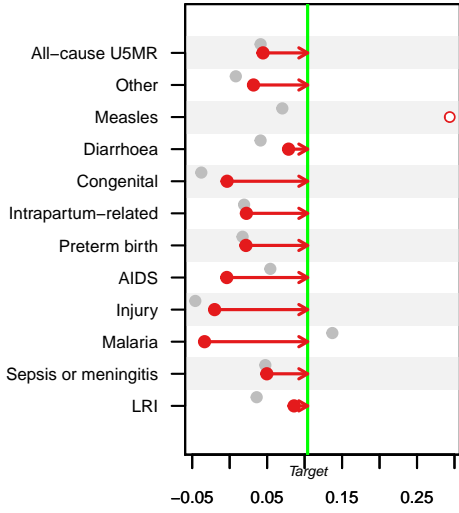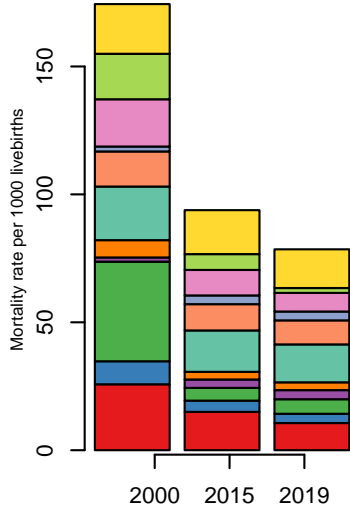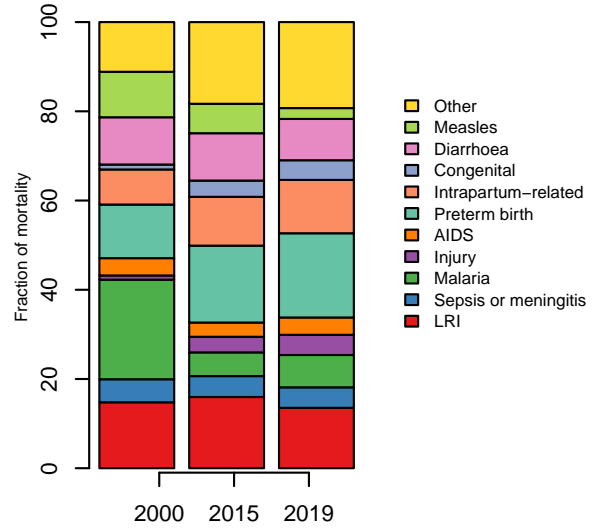

### Guinea-Bissau (Neonatal)

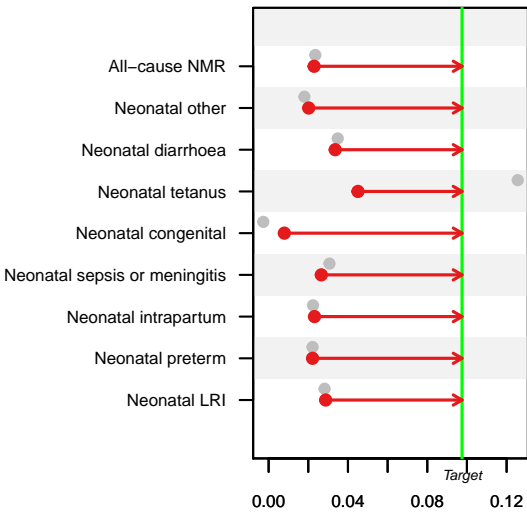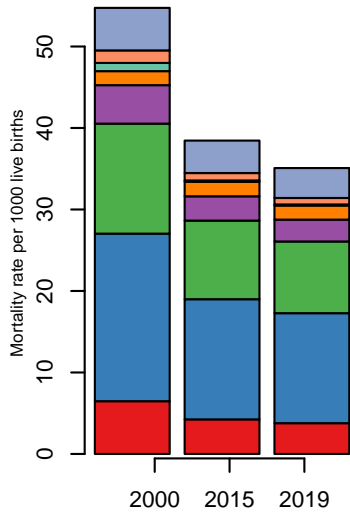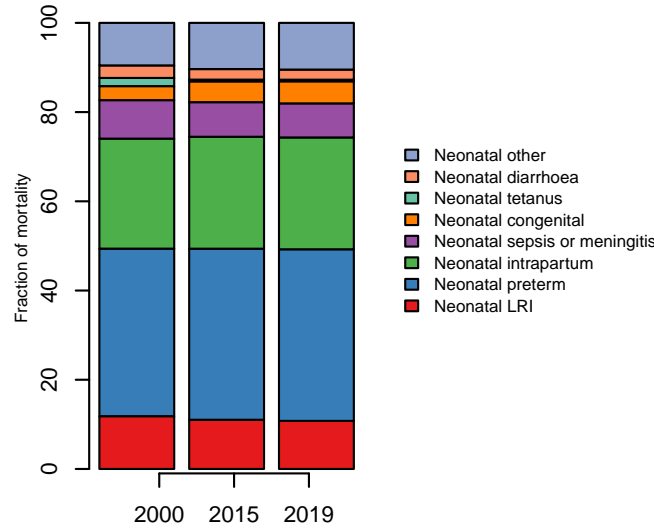

● 2000 – 2015      ● 2015 – 2019 (not on target)      → Deficit to target      ○ 2015 – 2019 (on target)

### Equatorial Guinea (Under five)

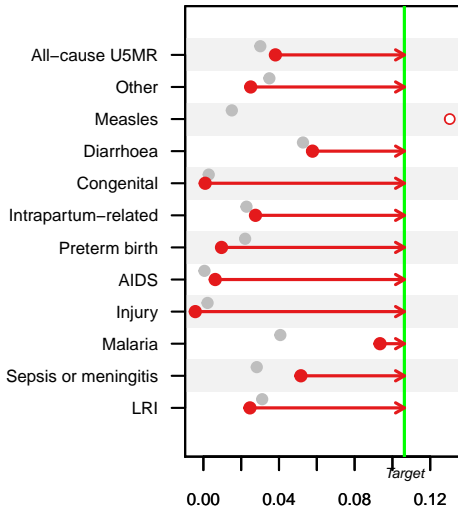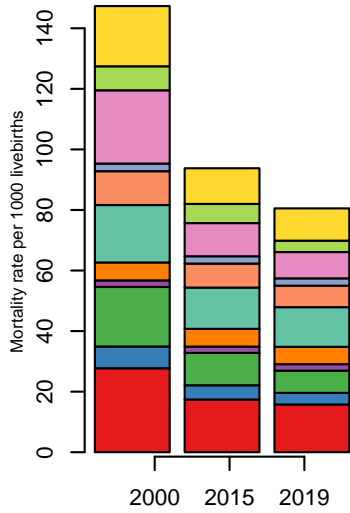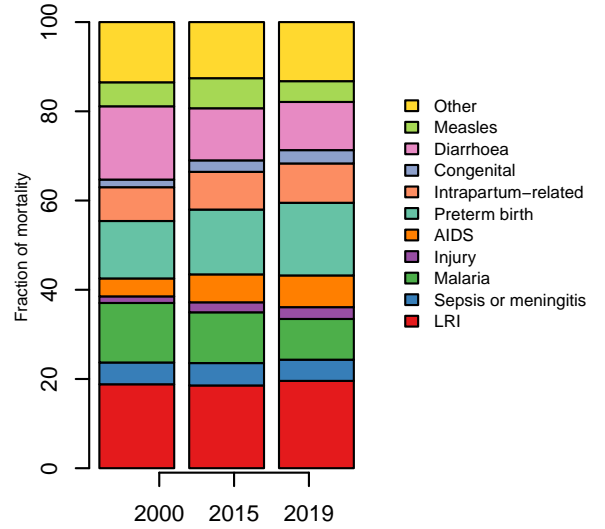

### Equatorial Guinea (Neonatal)

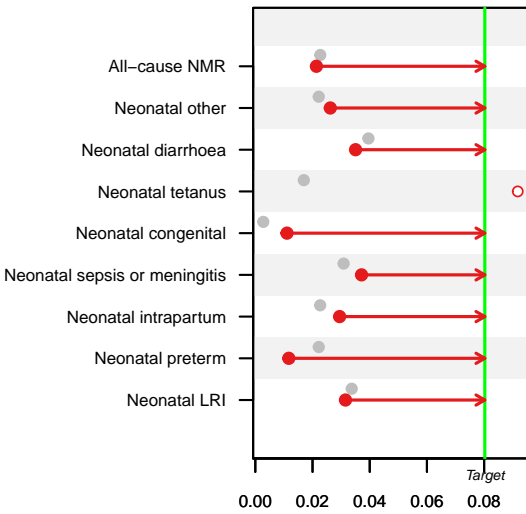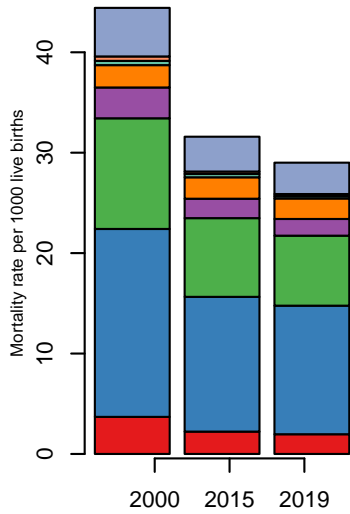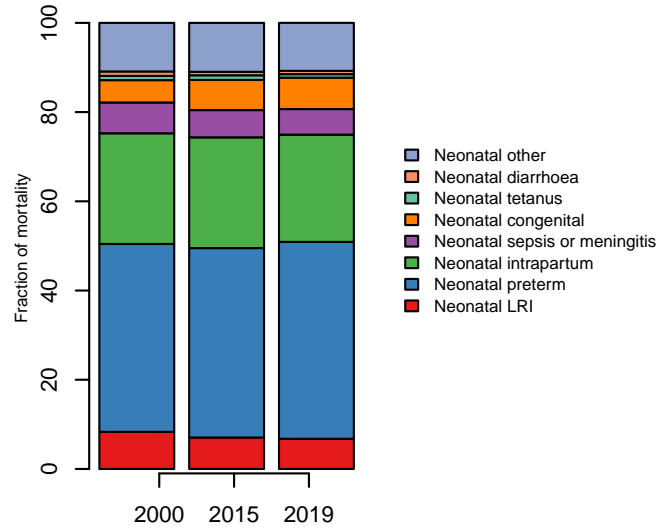

● 2000 – 2015      ● 2015 – 2019 (not on target)      → Deficit to target      ○ 2015 – 2019 (on target)



### Greece (Under five)

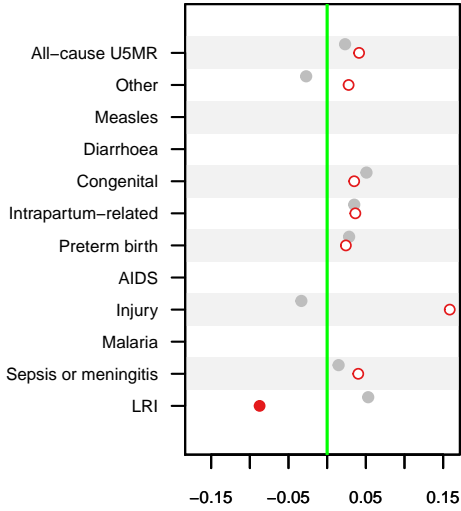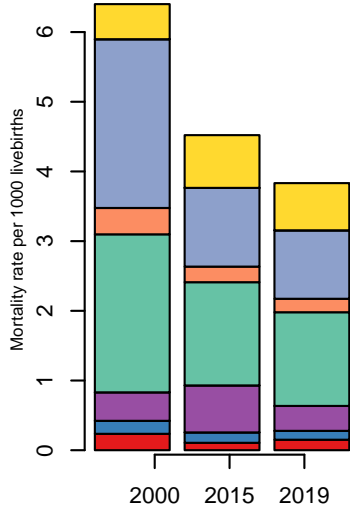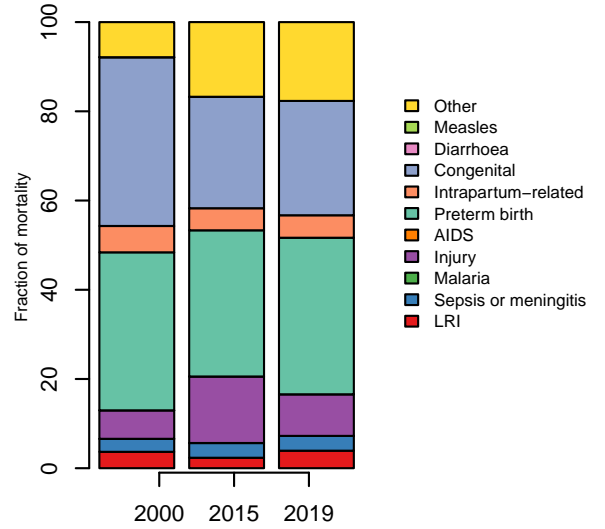

### Greece (Neonatal)

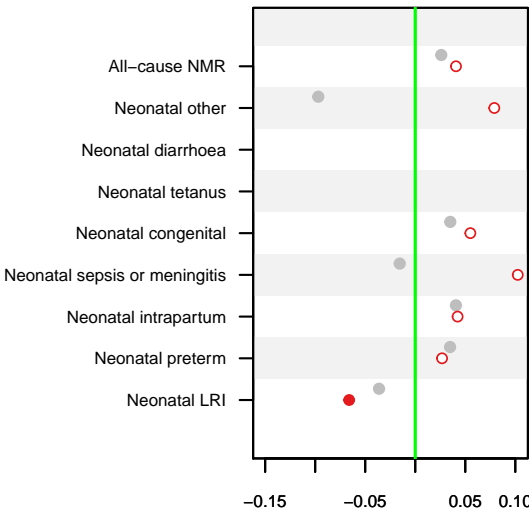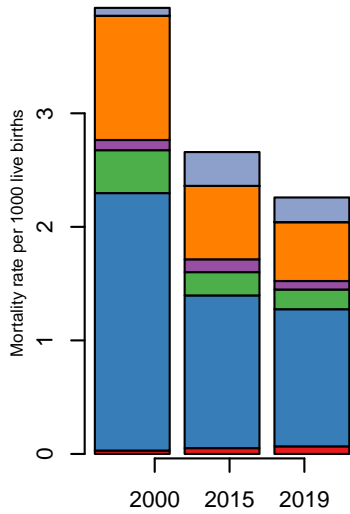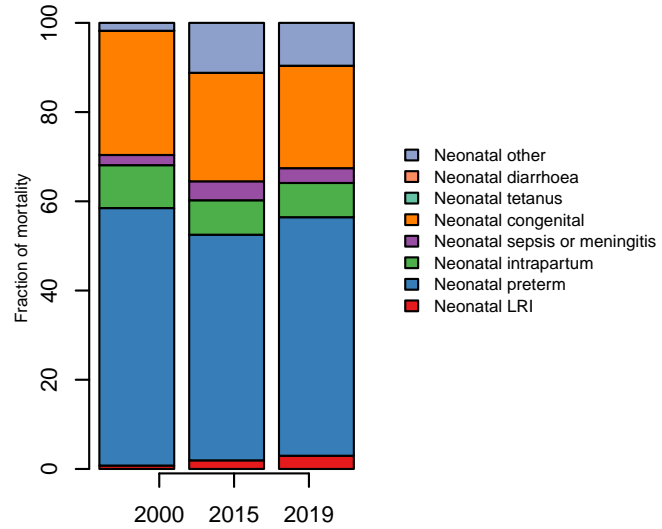

● 2000 – 2015      ● 2015 – 2019 (not on target)      → Deficit to target      ○ 2015 – 2019 (on target)

### Guatemala (Under five)

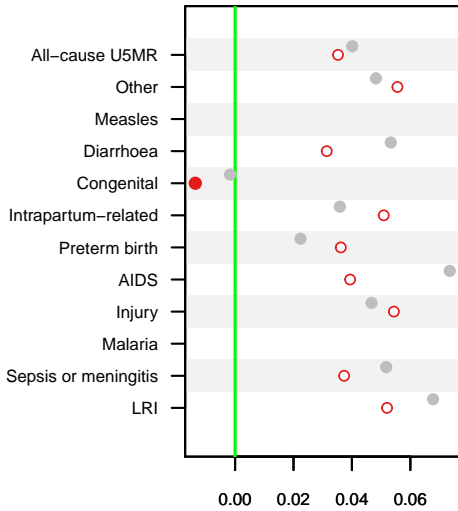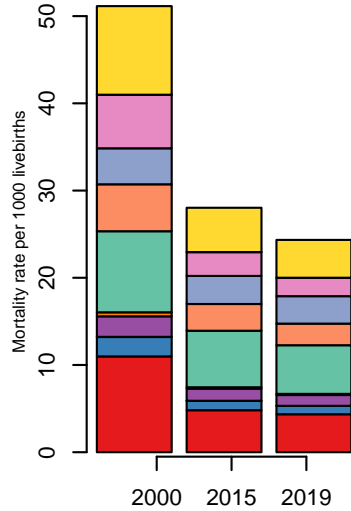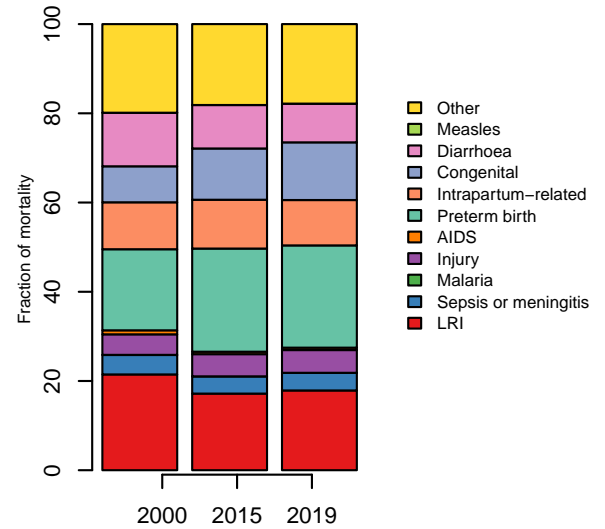

### Guatemala (Neonatal)

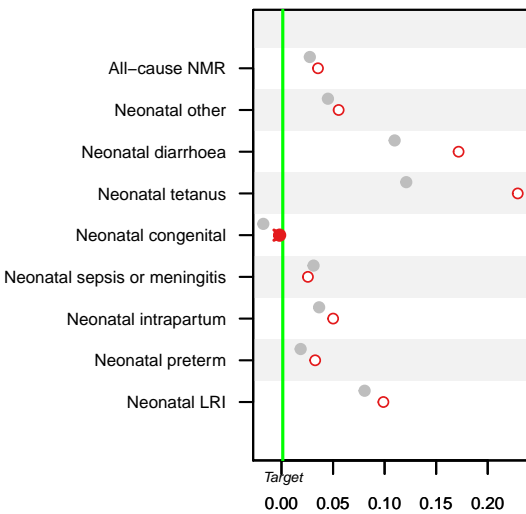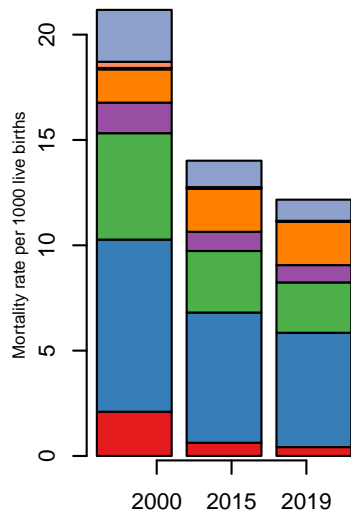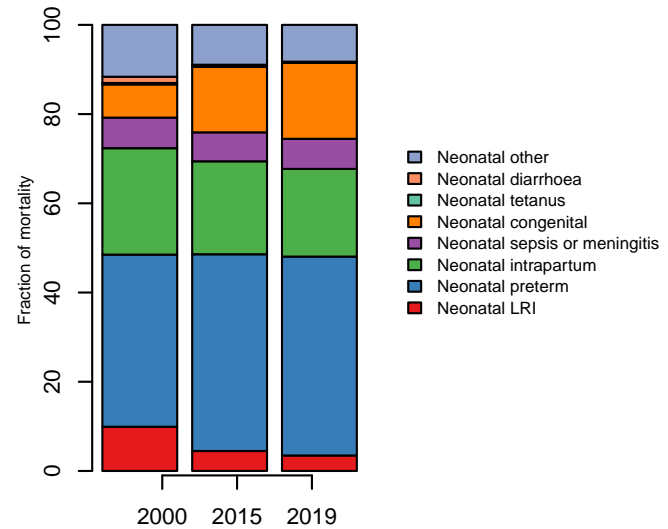

● 2000 – 2015      ● 2015 – 2019 (not on target)      → Deficit to target      ○ 2015 – 2019 (on target)

### Guyana (Under five)

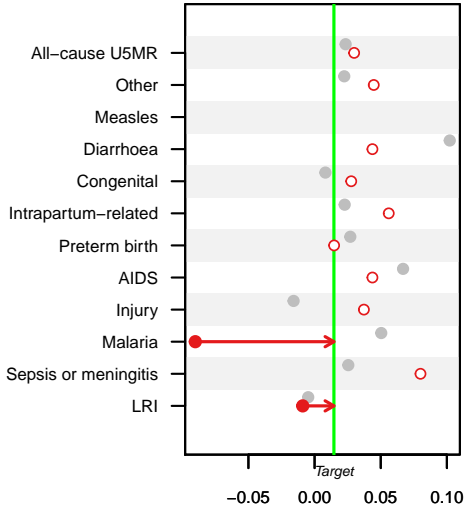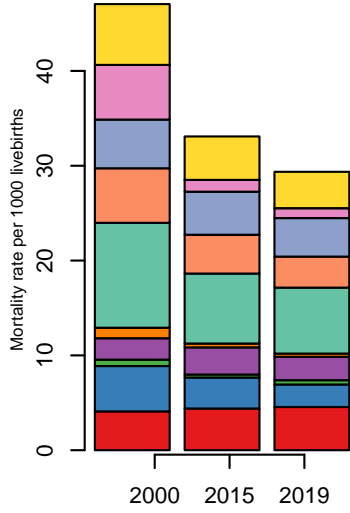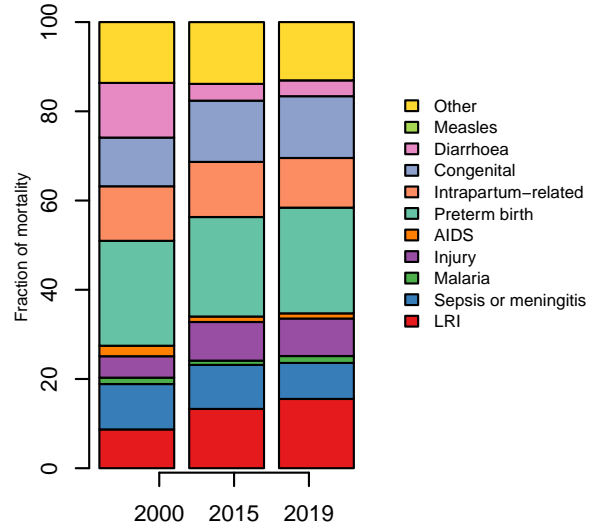

### Guyana (Neonatal)

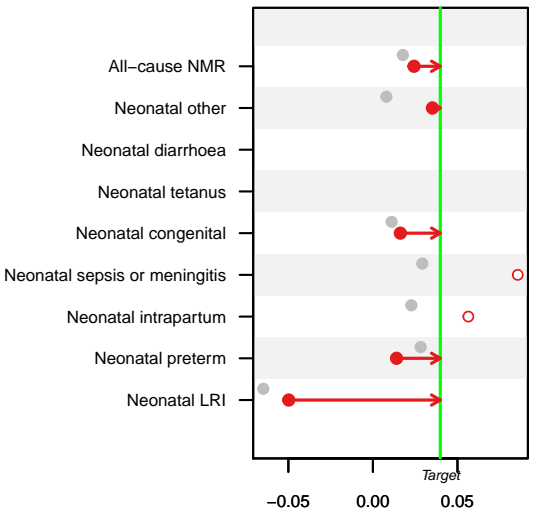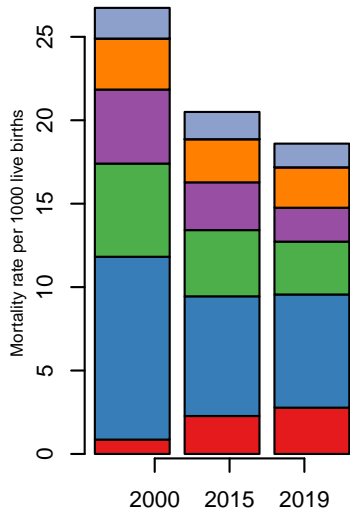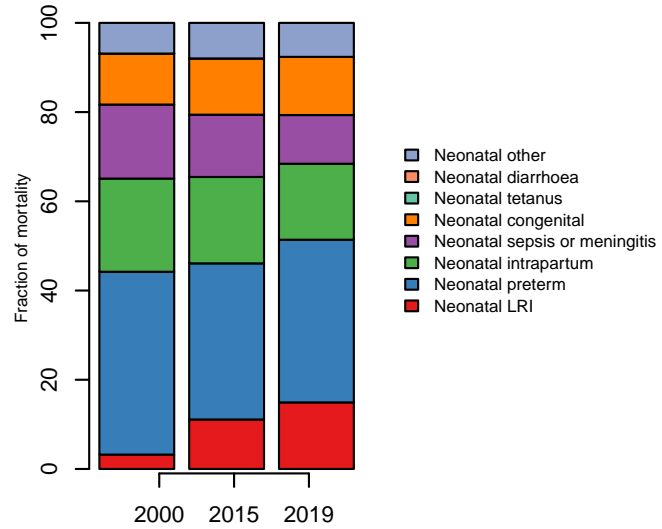

● 2000 – 2015      ● 2015 – 2019 (not on target)      → Deficit to target      ○ 2015 – 2019 (on target)

### Honduras (Under five)

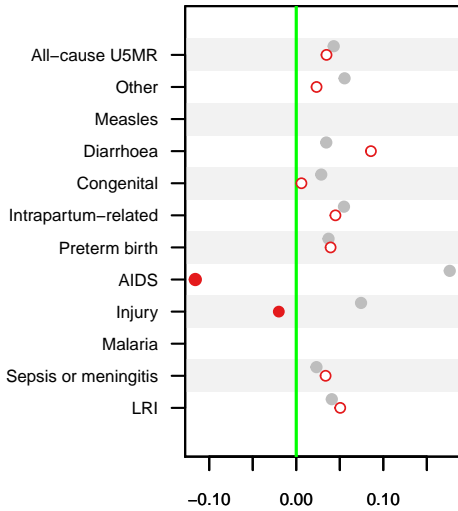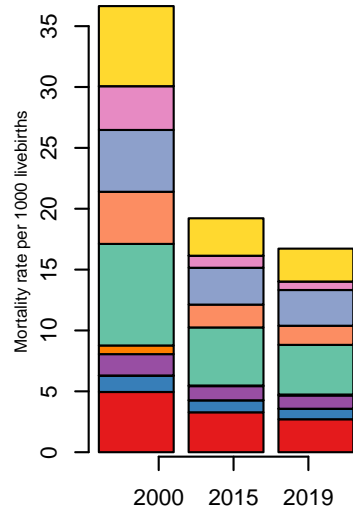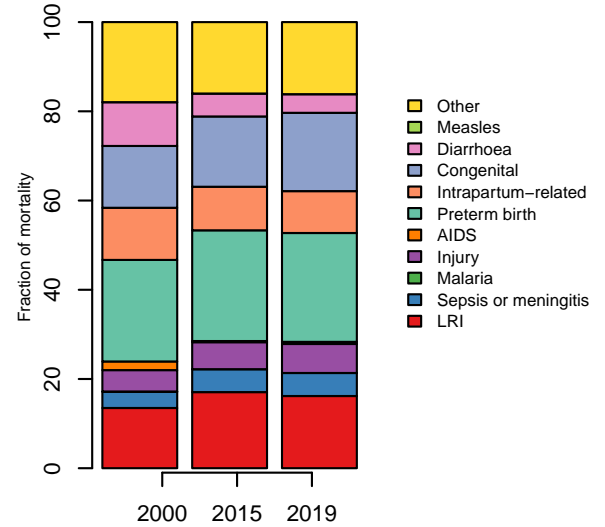

### Honduras (Neonatal)

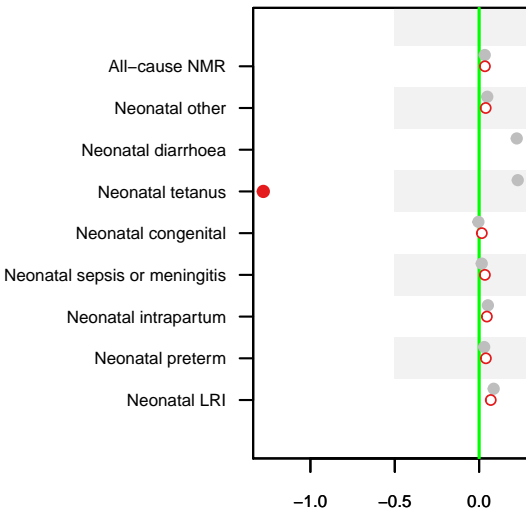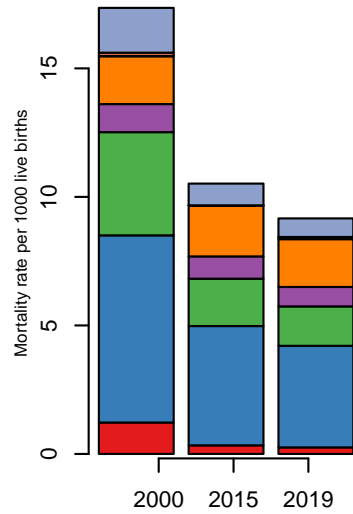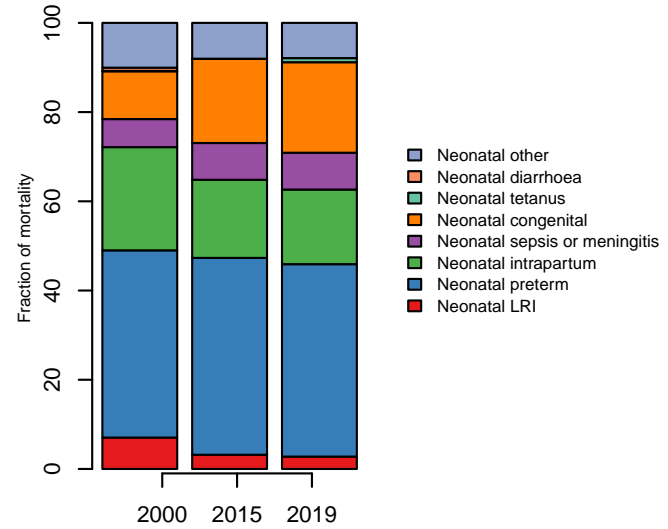

● 2000 – 2015      ● 2015 – 2019 (not on target)      → Deficit to target      ○ 2015 – 2019 (on target)

### Croatia (Under five)

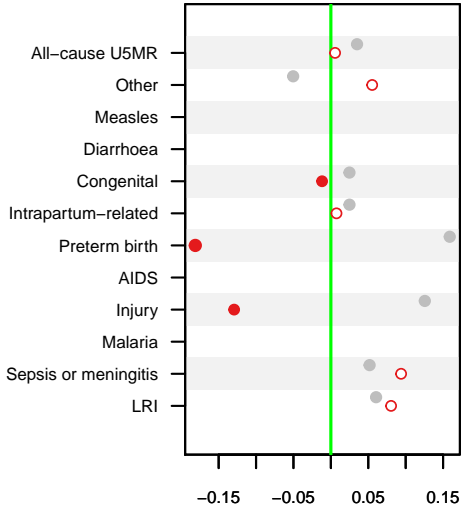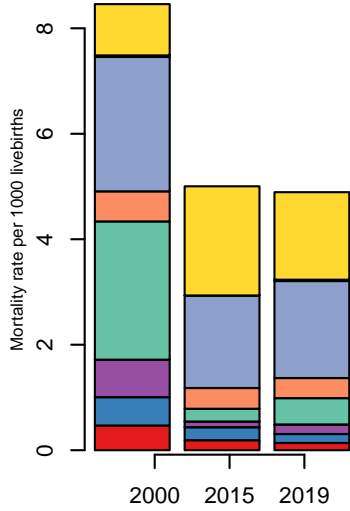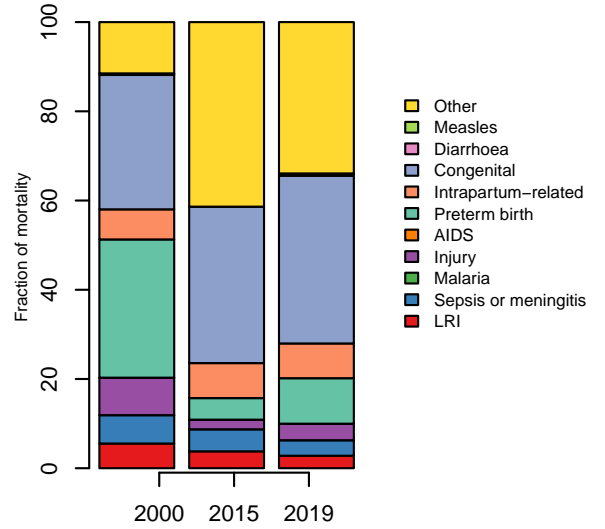

### Croatia (Neonatal)

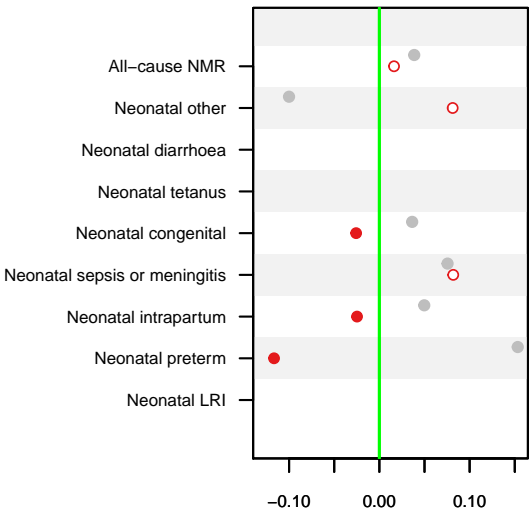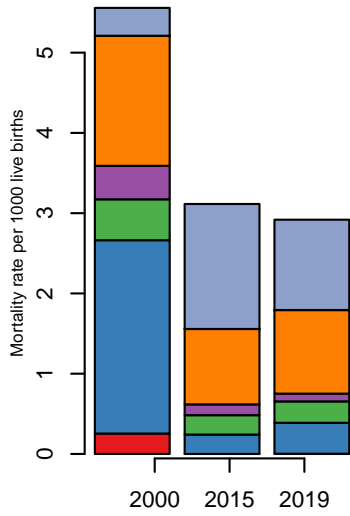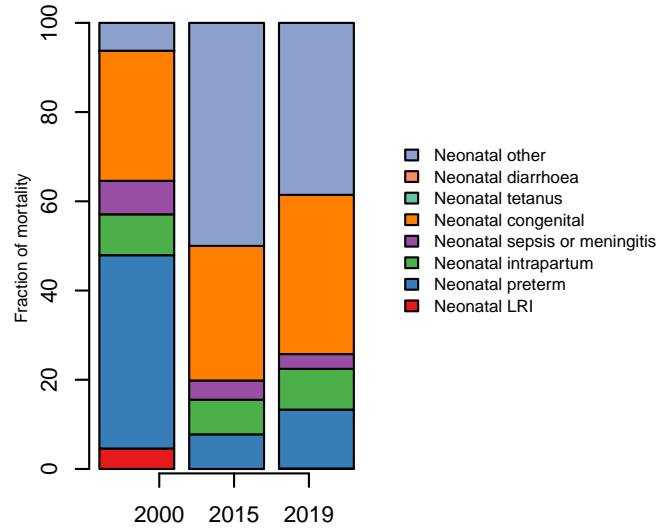

● 2000 – 2015      ● 2015 – 2019 (not on target)      → Deficit to target      ○ 2015 – 2019 (on target)

### Haiti (Under five)

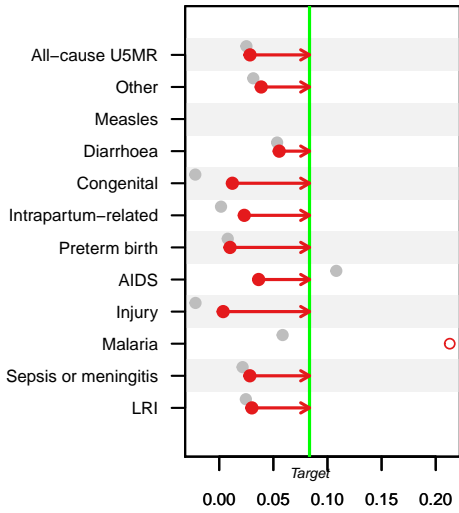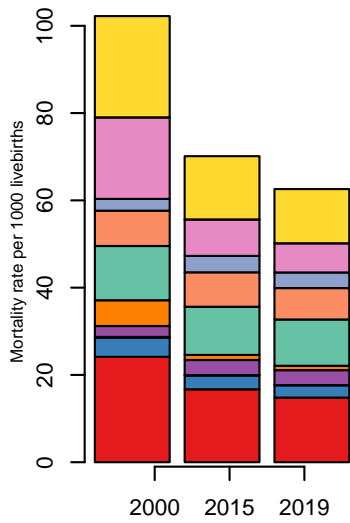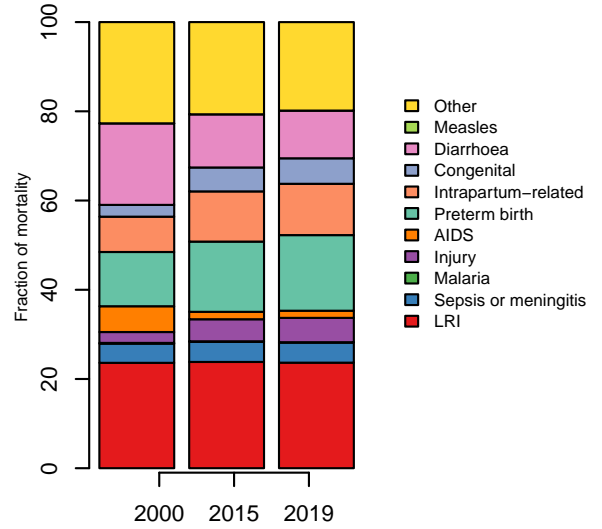

### Haiti (Neonatal)

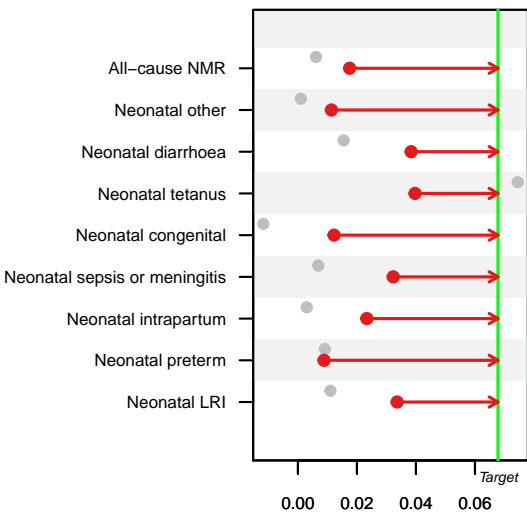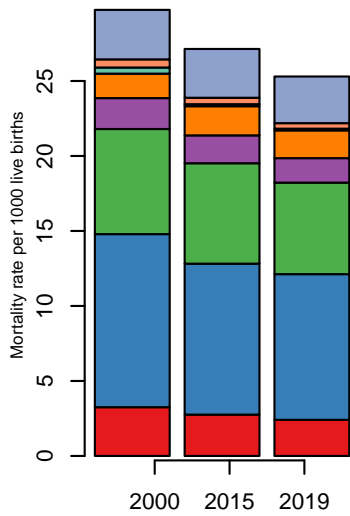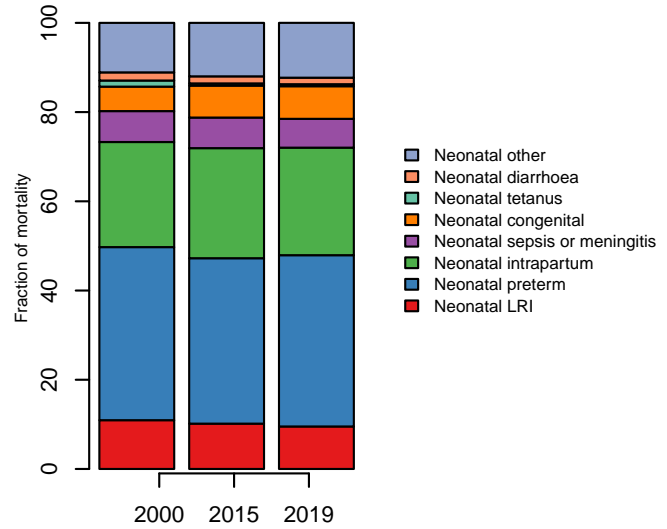

● 2000 – 2015      ● 2015 – 2019 (not on target)      → Deficit to target      ○ 2015 – 2019 (on target)

### Hungary (Under five)

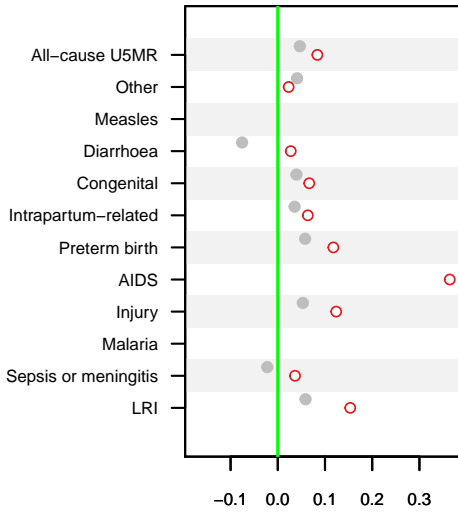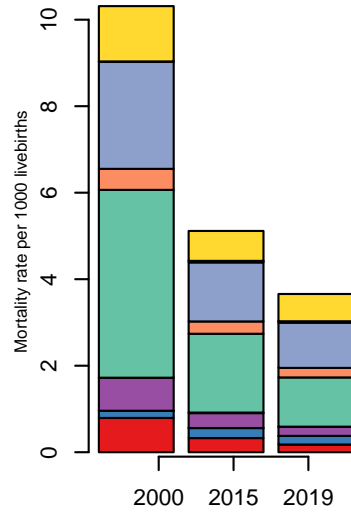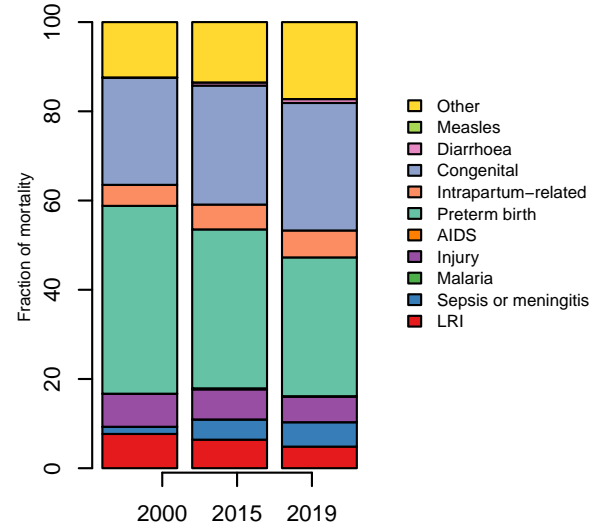

### Hungary (Neonatal)

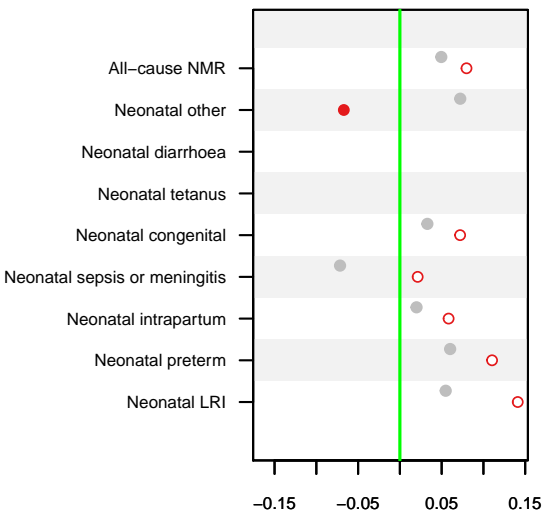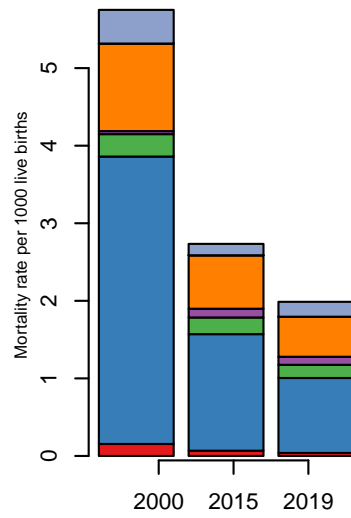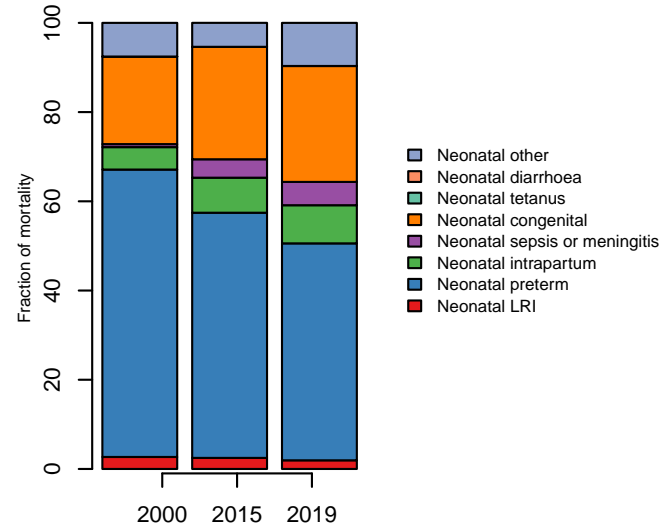

● 2000 – 2015      ● 2015 – 2019 (not on target)      → Deficit to target      ○ 2015 – 2019 (on target)

### Indonesia (Under five)

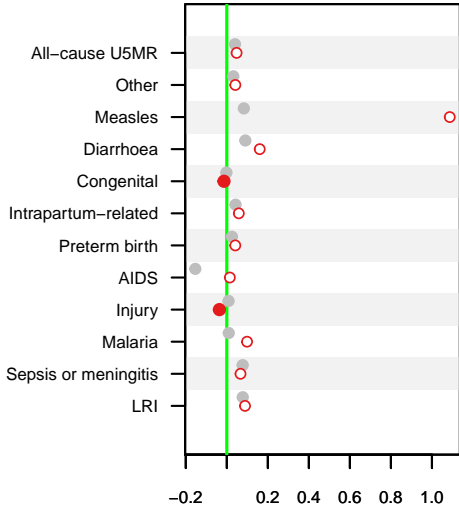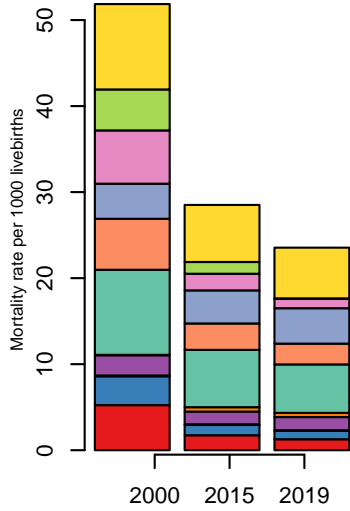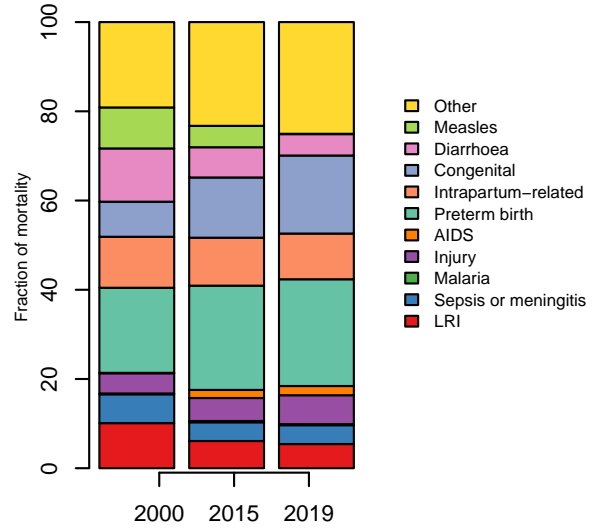

### Indonesia (Neonatal)

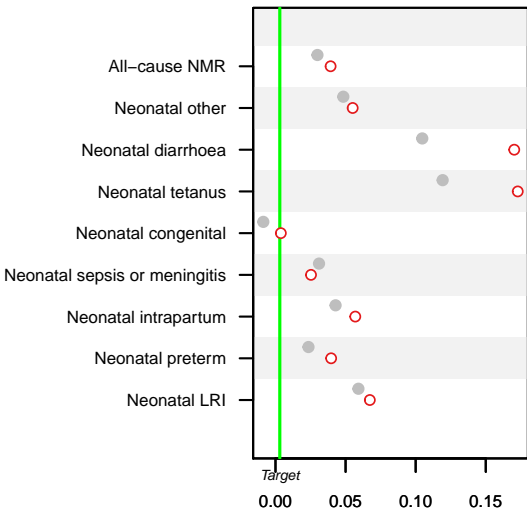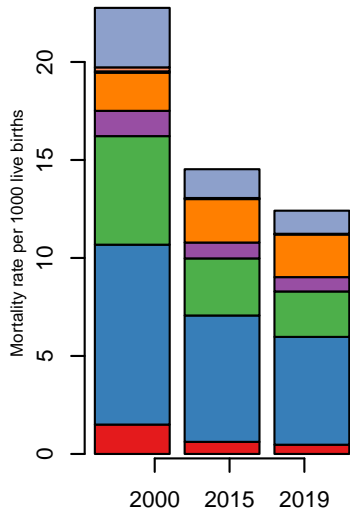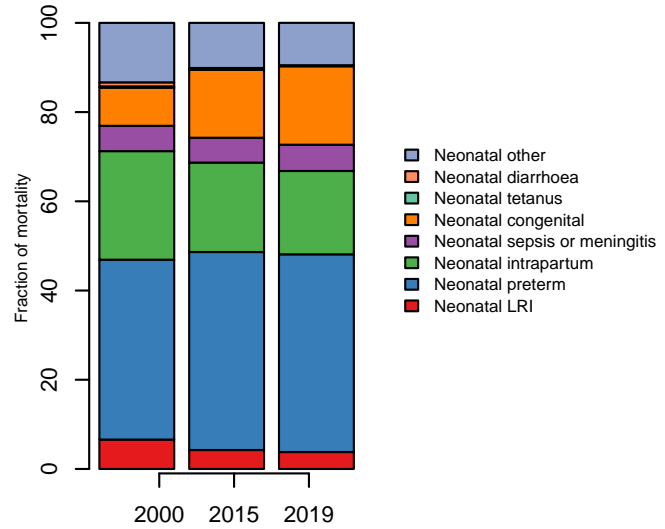

● 2000 – 2015      ● 2015 – 2019 (not on target)      → Deficit to target      ○ 2015 – 2019 (on target)



### India (Under five)

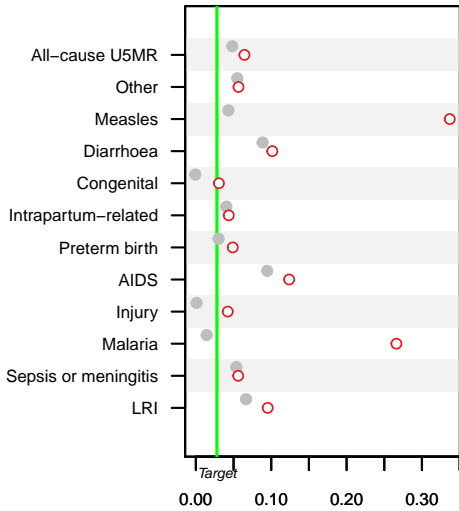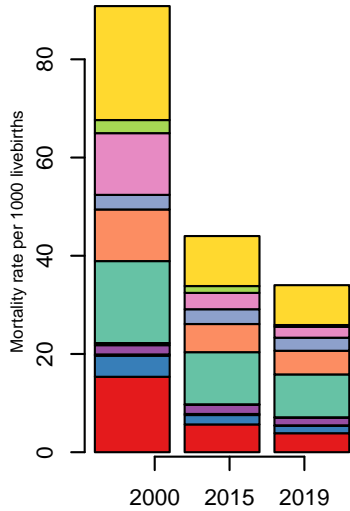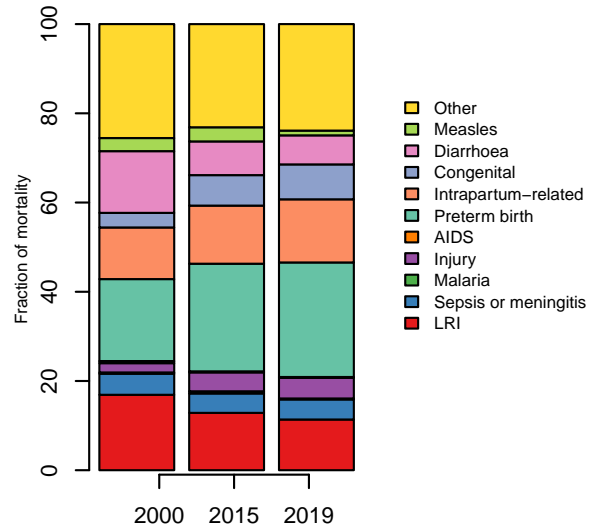

### India (Neonatal)

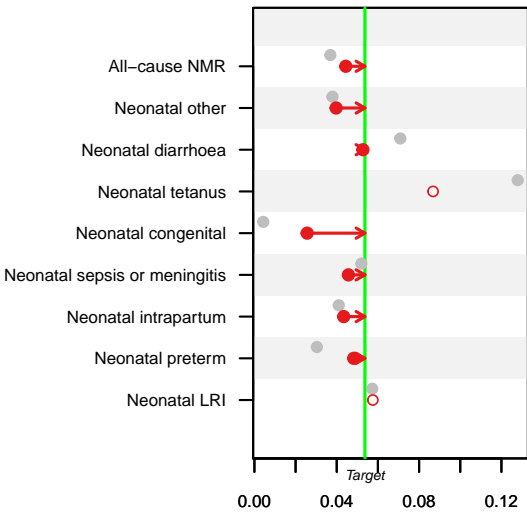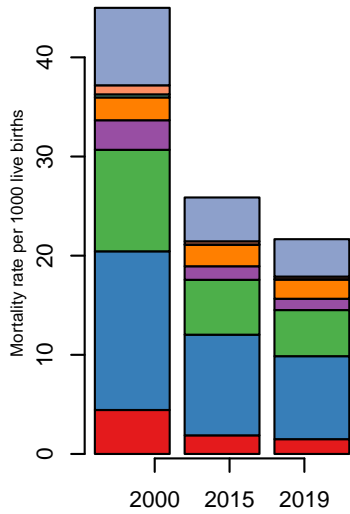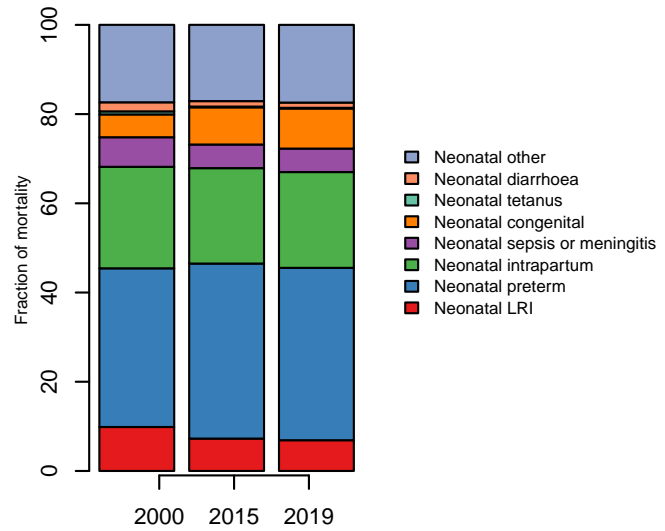

● 2000 – 2015      ● 2015 – 2019 (not on target)      → Deficit to target      ○ 2015 – 2019 (on target)

### Ireland (Under five)

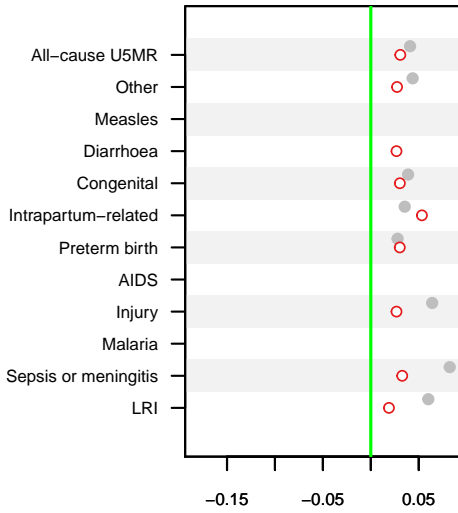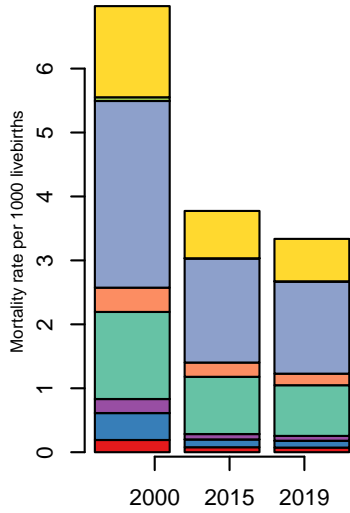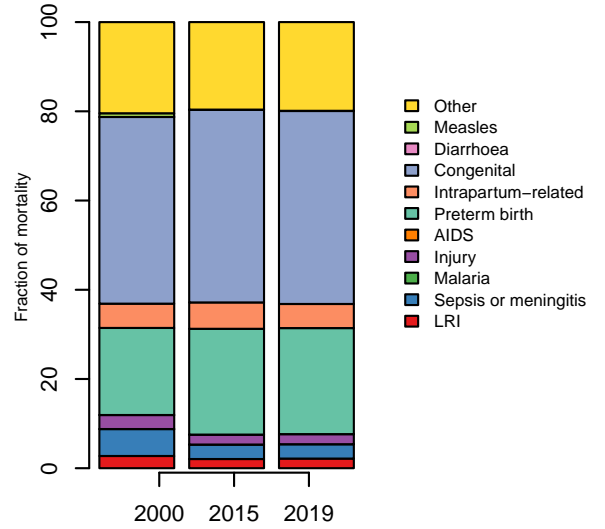

### Ireland (Neonatal)

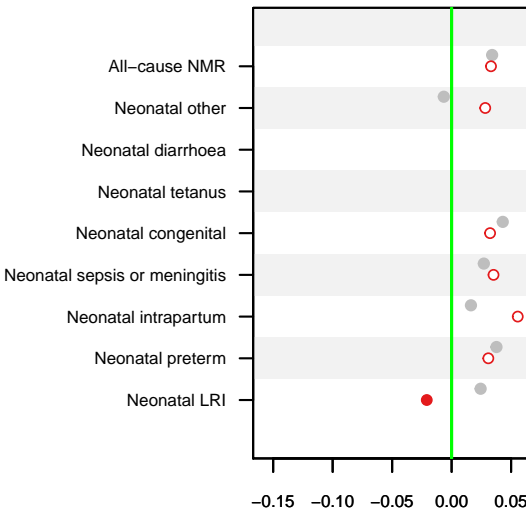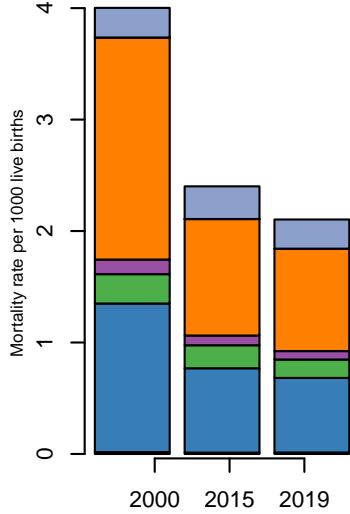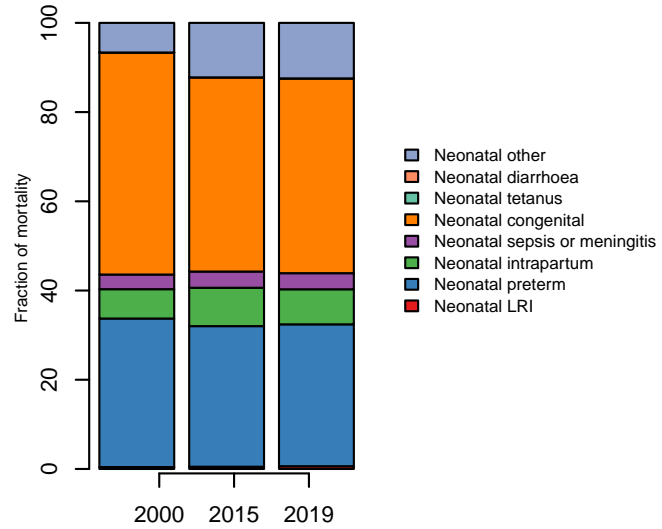

● 2000 – 2015      ● 2015 – 2019 (not on target)      → Deficit to target      ○ 2015 – 2019 (on target)

### Iran (Islamic Republic of) (Under five)

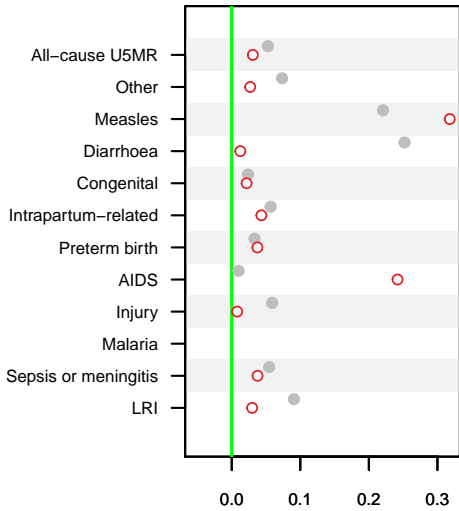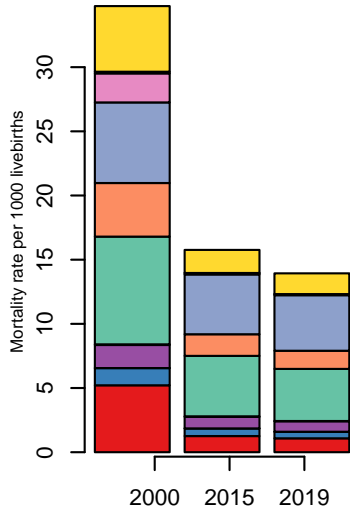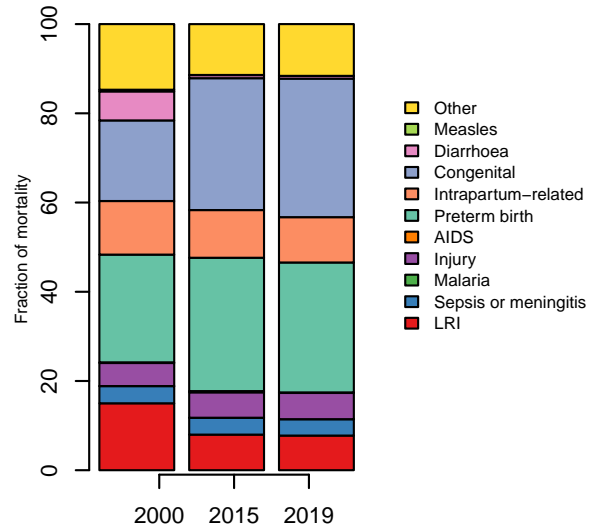

### Iran (Islamic Republic of) (Neonatal)

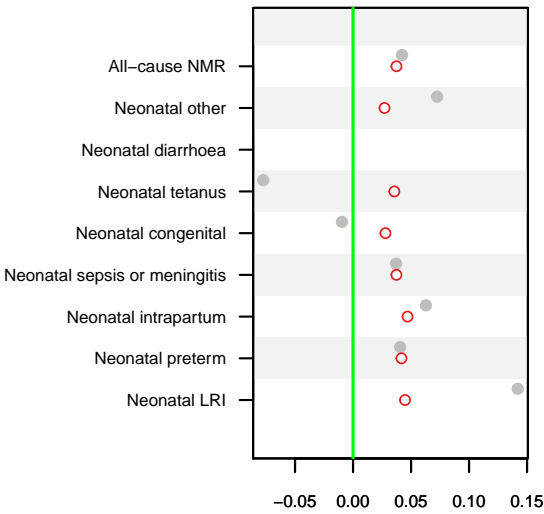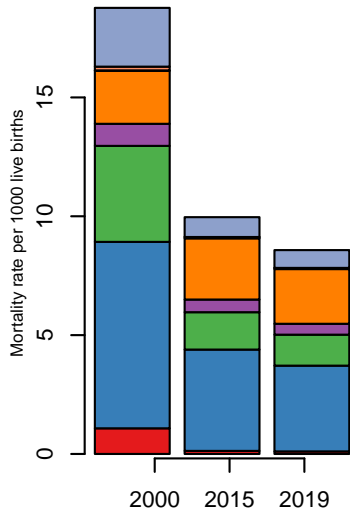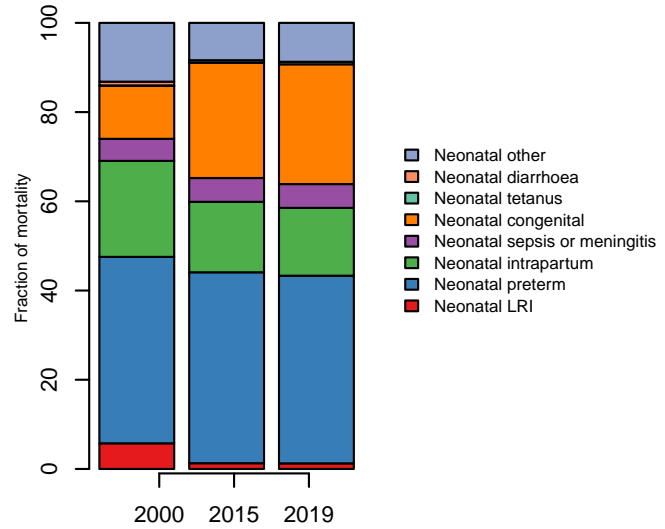

● 2000 - 2015      ● 2015 - 2019 (not on target)      → Deficit to target      ○ 2015 - 2019 (on target)

### Iraq (Under five)

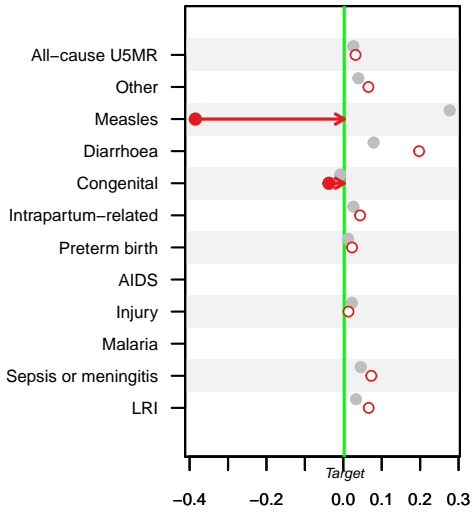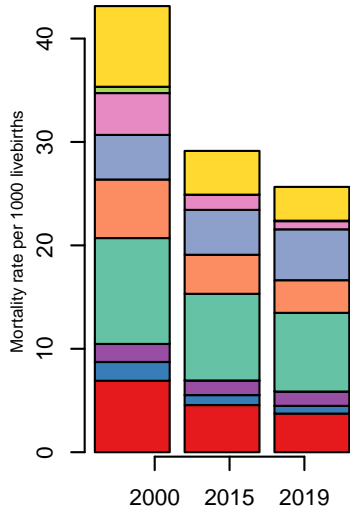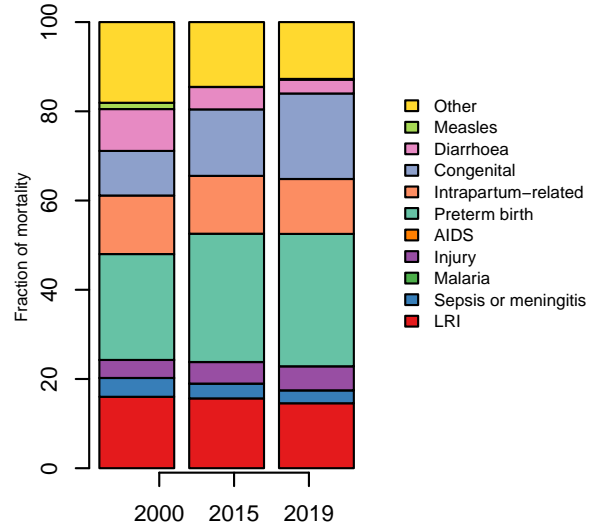

### Iraq (Neonatal)

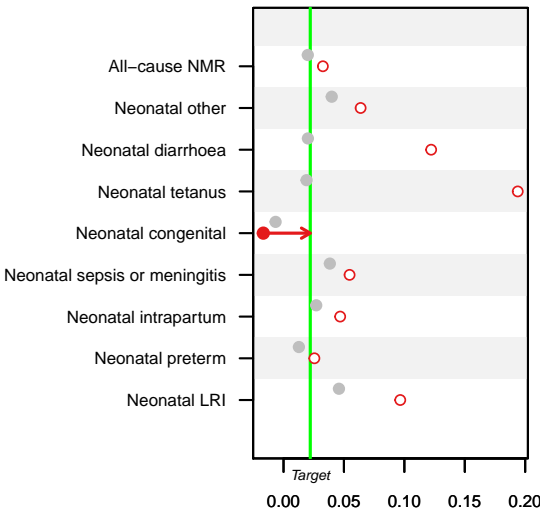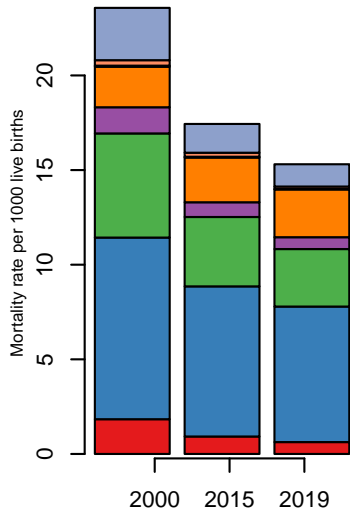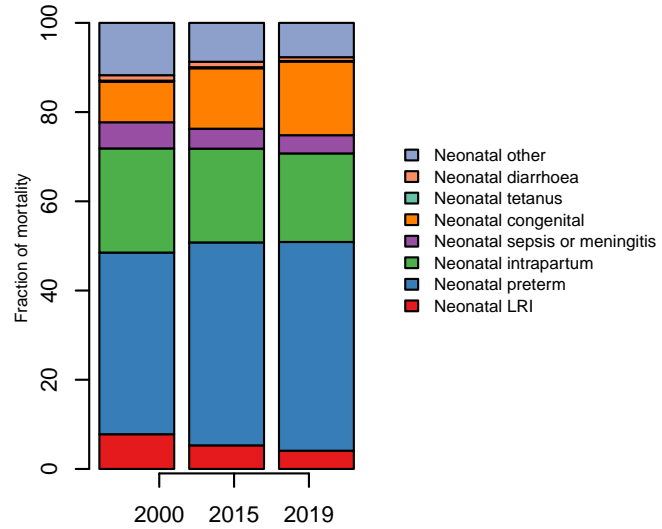

● 2000 – 2015      ● 2015 – 2019 (not on target)      → Deficit to target      ○ 2015 – 2019 (on target)

### Israel (Under five)

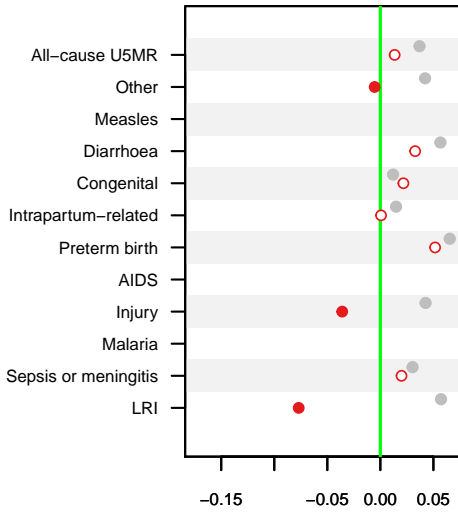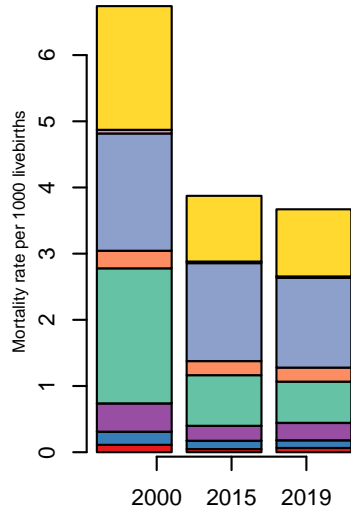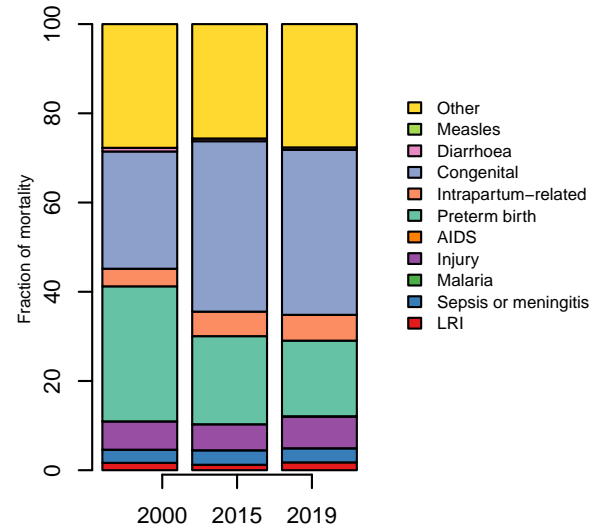

### Israel (Neonatal)

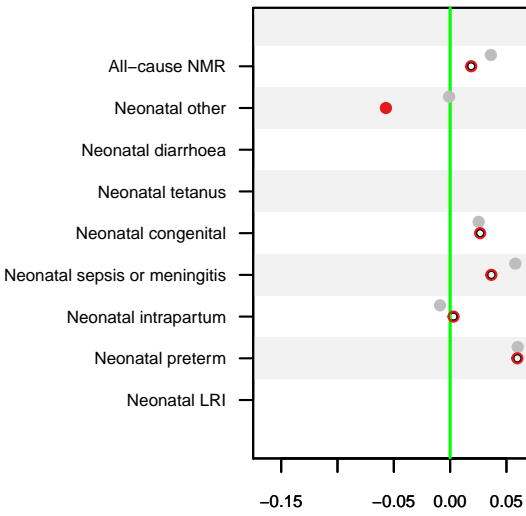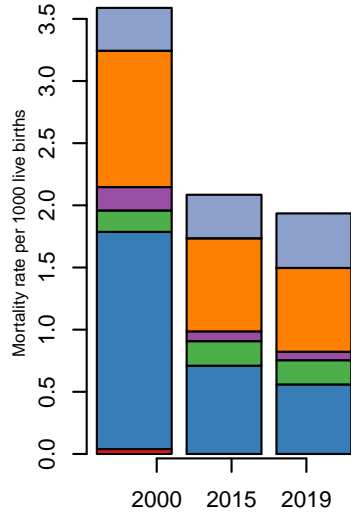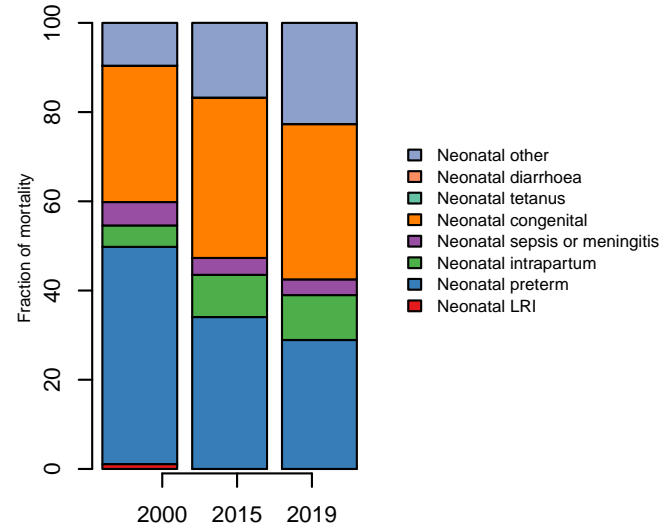

● 2000 – 2015      ● 2015 – 2019 (not on target)      → Deficit to target      ○ 2015 – 2019 (on target)

### Italy (Under five)

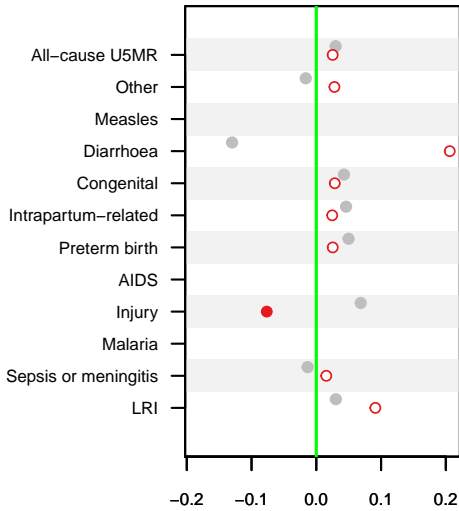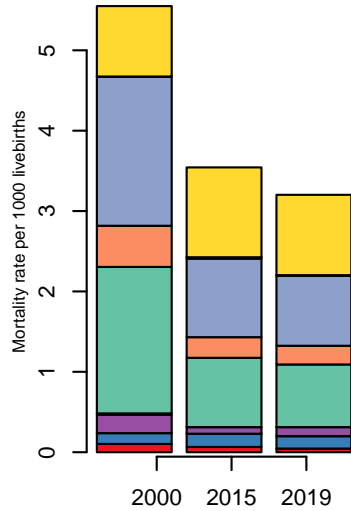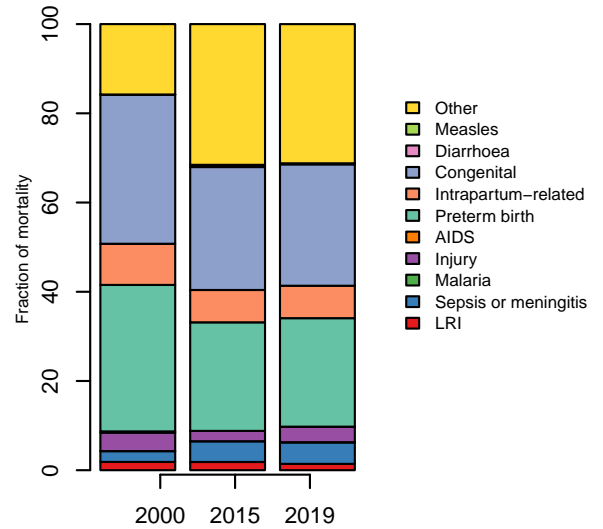

### Italy (Neonatal)

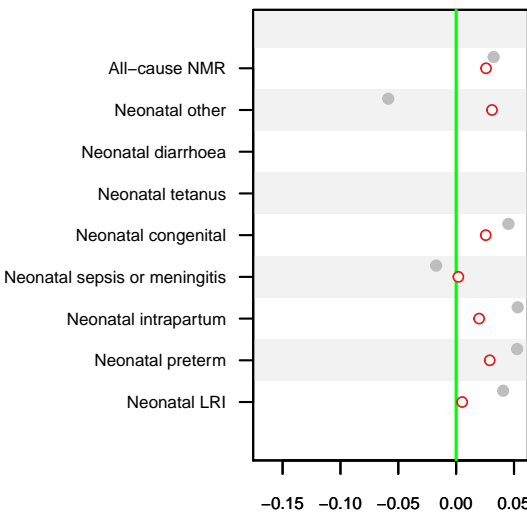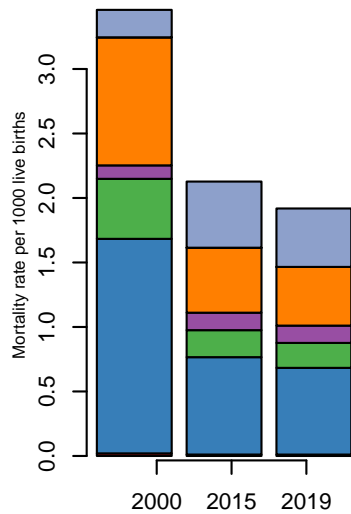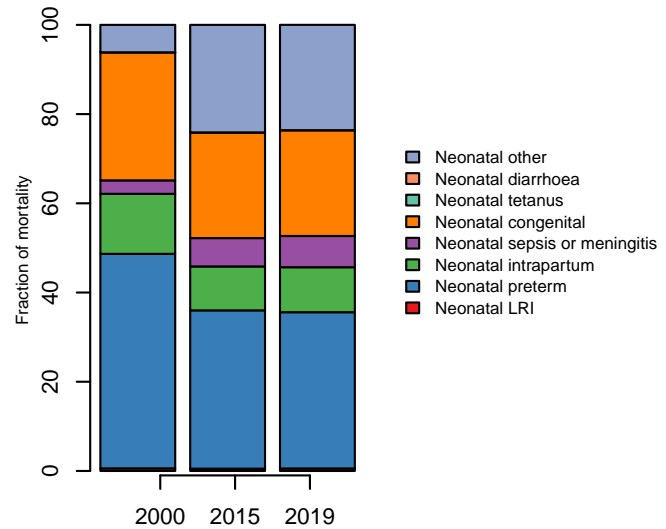

● 2000 – 2015      ● 2015 – 2019 (not on target)      → Deficit to target      ○ 2015 – 2019 (on target)

### Jamaica (Under five)

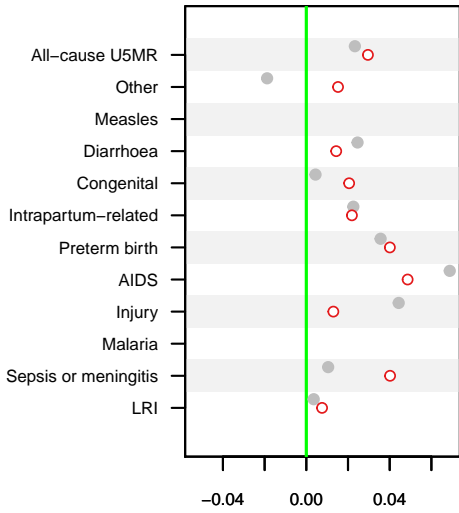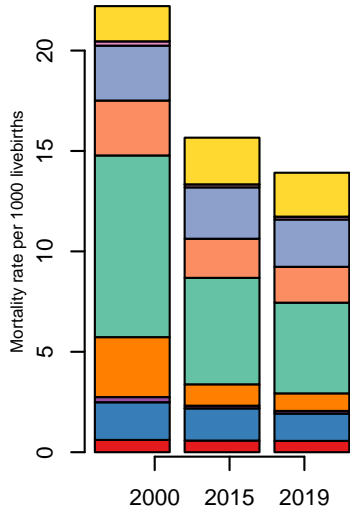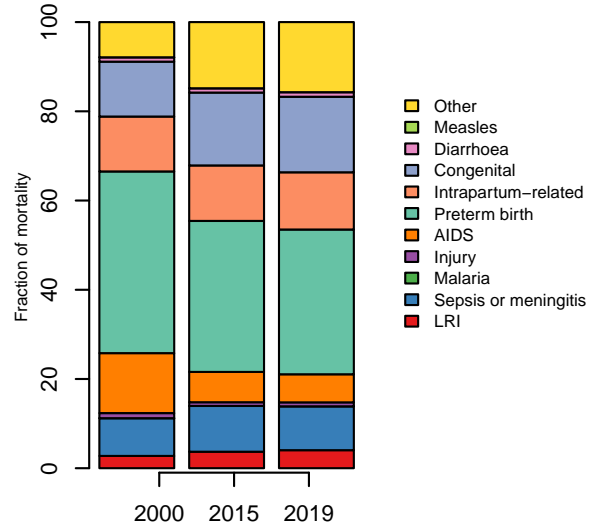

### Jamaica (Neonatal)

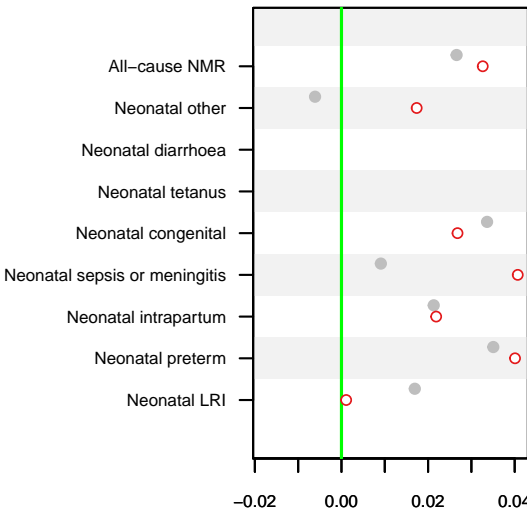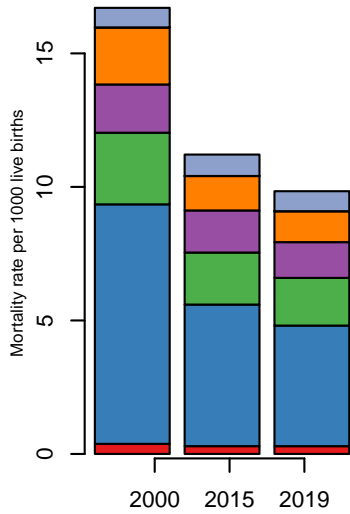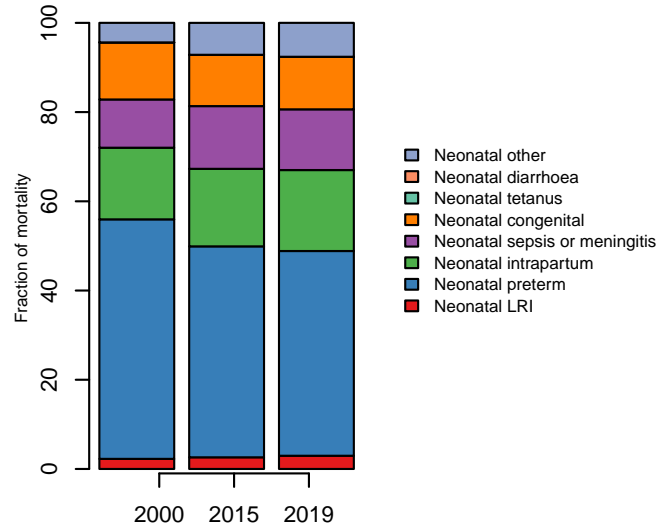

● 2000 – 2015      ● 2015 – 2019 (not on target)      → Deficit to target      ○ 2015 – 2019 (on target)

### Jordan (Under five)

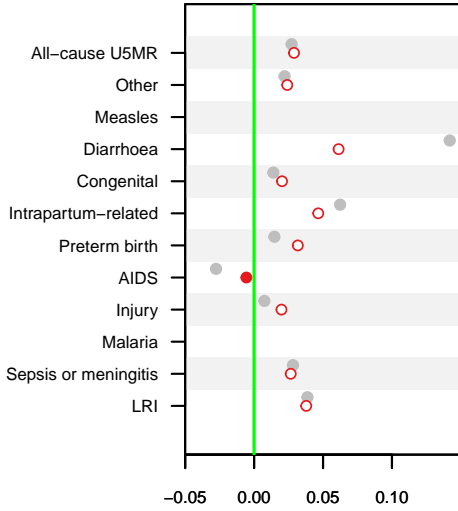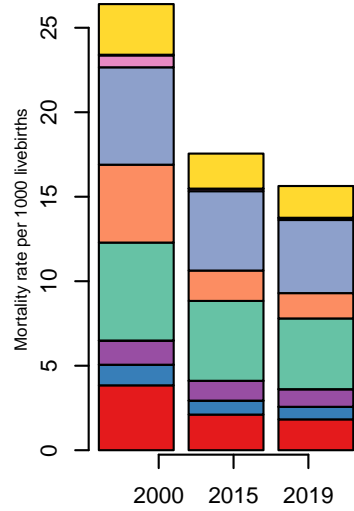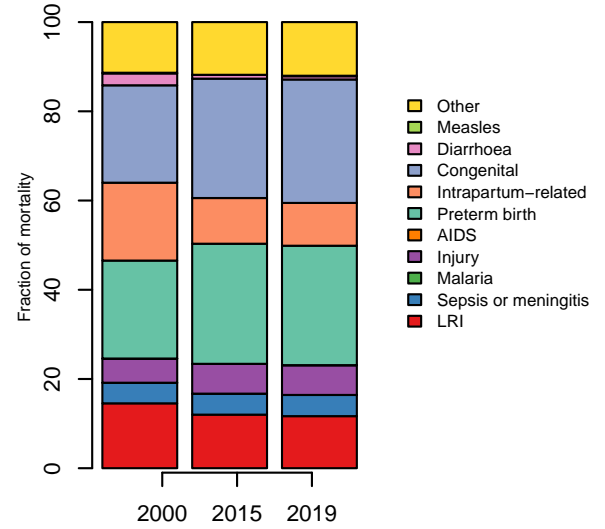

### Jordan (Neonatal)

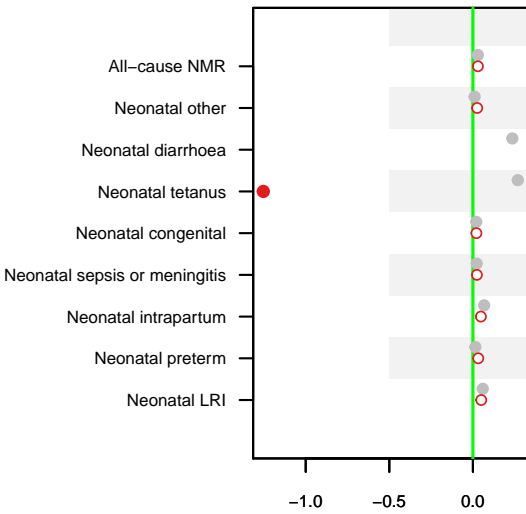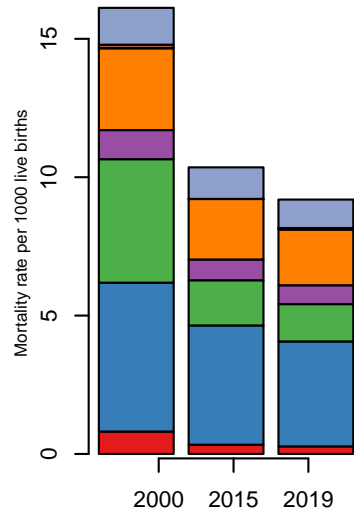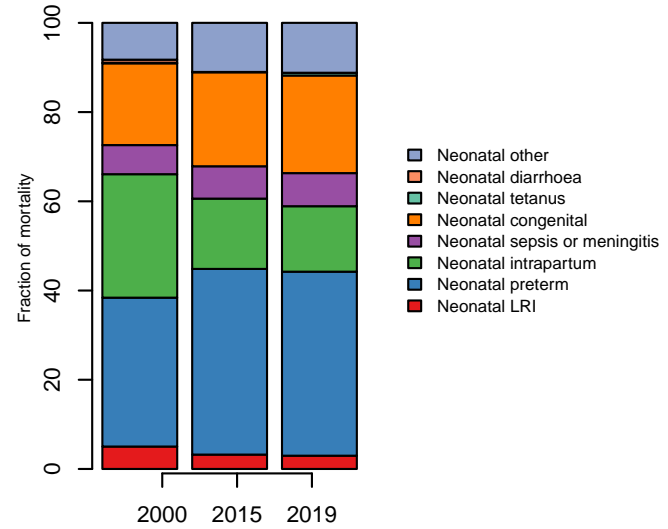

● 2000 – 2015      ● 2015 – 2019 (not on target)      → Deficit to target      ○ 2015 – 2019 (on target)



### Japan (Under five)

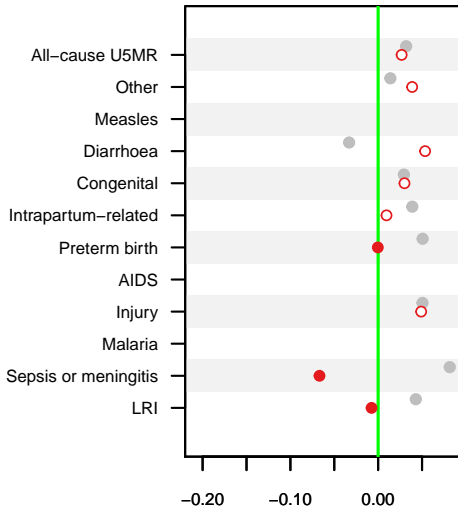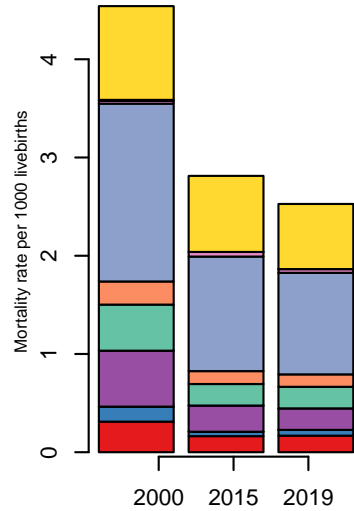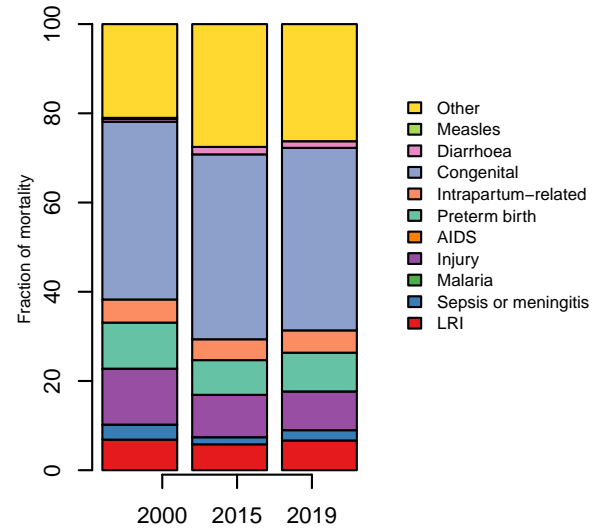

### Japan (Neonatal)

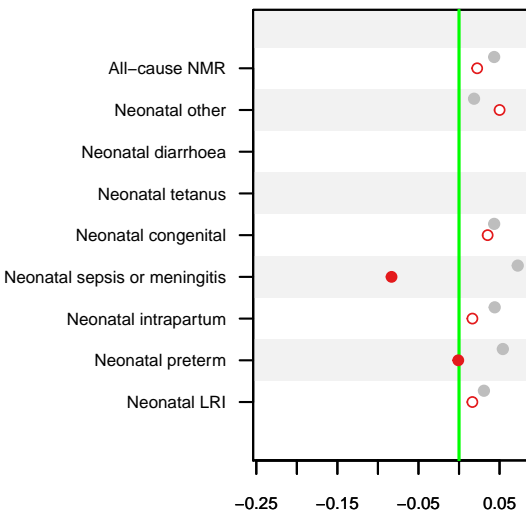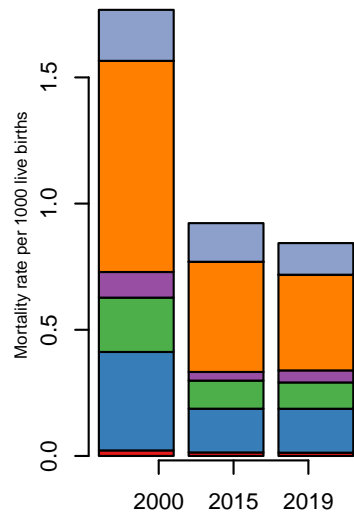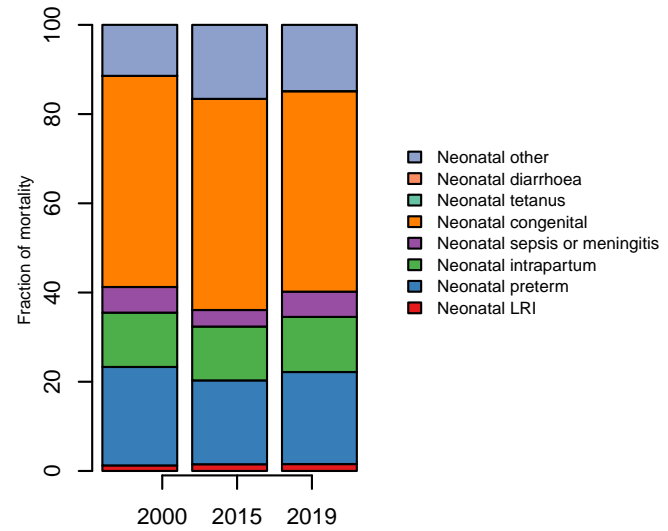

● 2000 – 2015      ● 2015 – 2019 (not on target)      → Deficit to target      ○ 2015 – 2019 (on target)

### Kazakhstan (Under five)

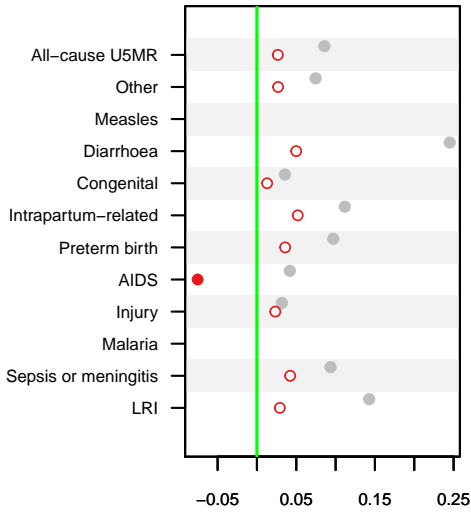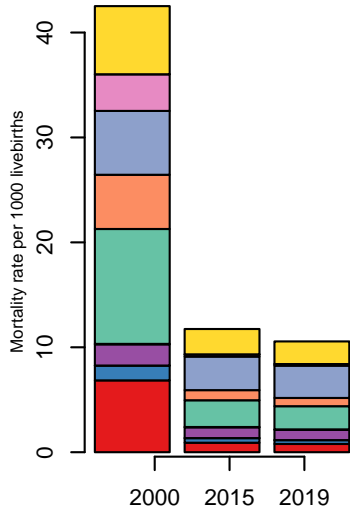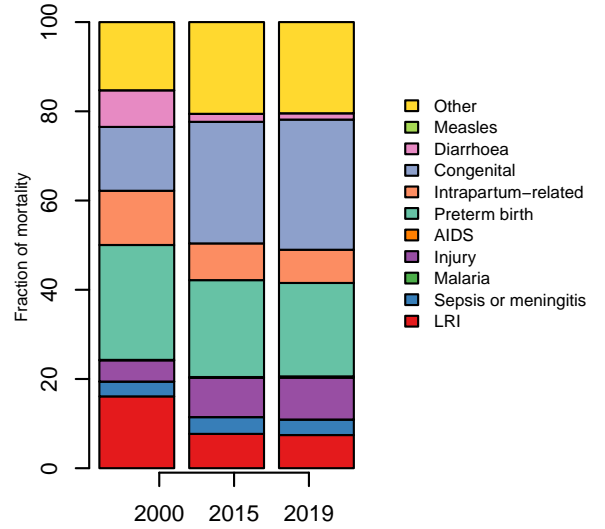

### Kazakhstan (Neonatal)

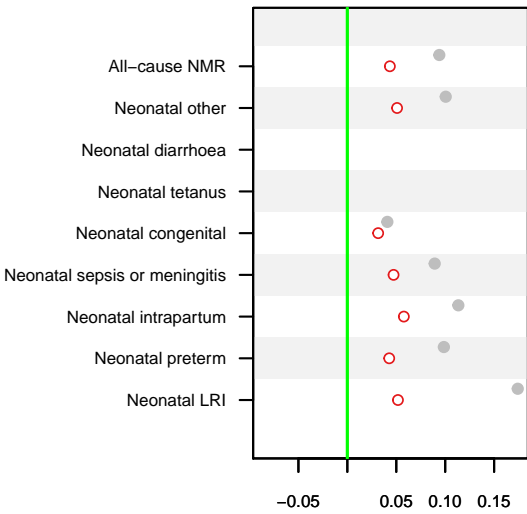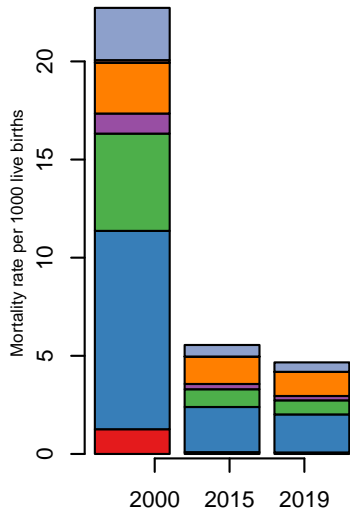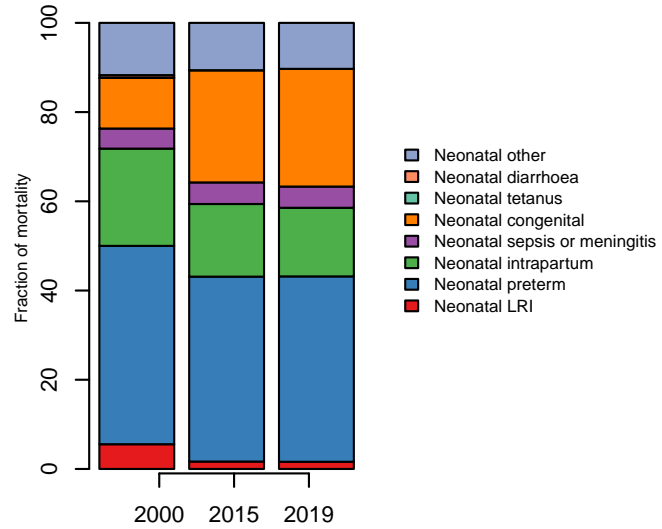

● 2000 – 2015      ● 2015 – 2019 (not on target)      → Deficit to target      ○ 2015 – 2019 (on target)

### Kenya (Under five)

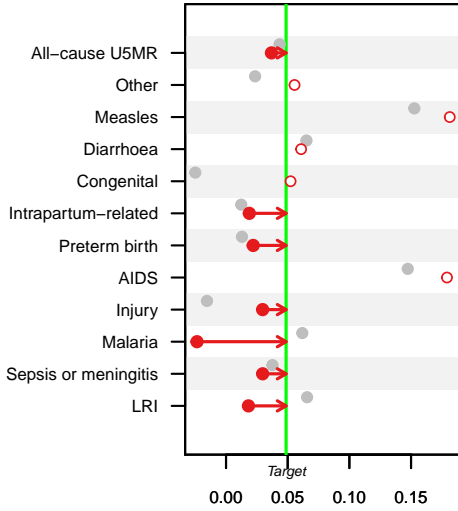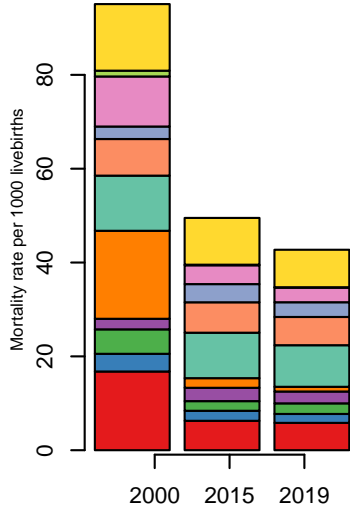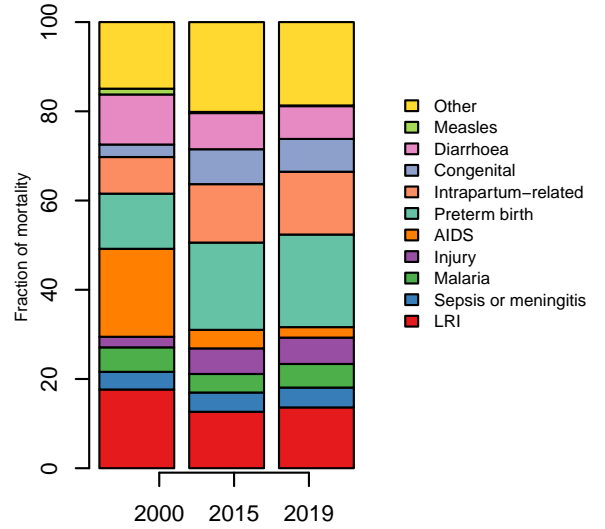

### Kenya (Neonatal)

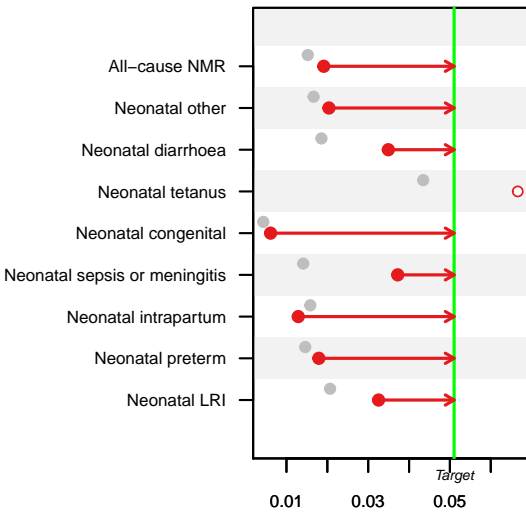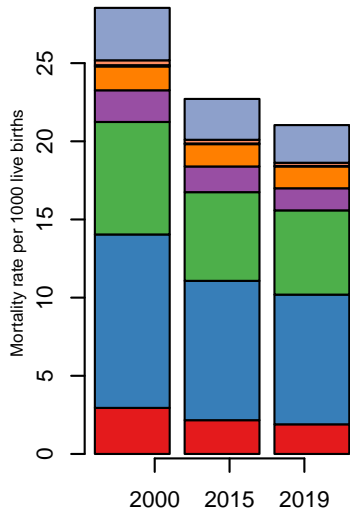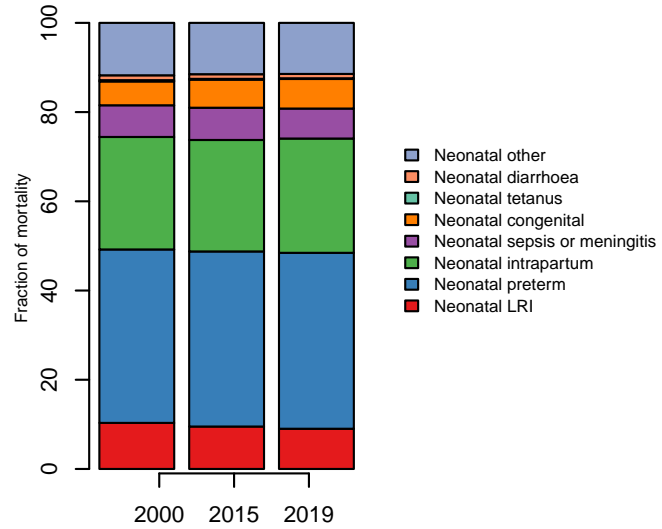

● 2000 – 2015      ● 2015 – 2019 (not on target)      → Deficit to target      ○ 2015 – 2019 (on target)

### Kyrgyzstan (Under five)

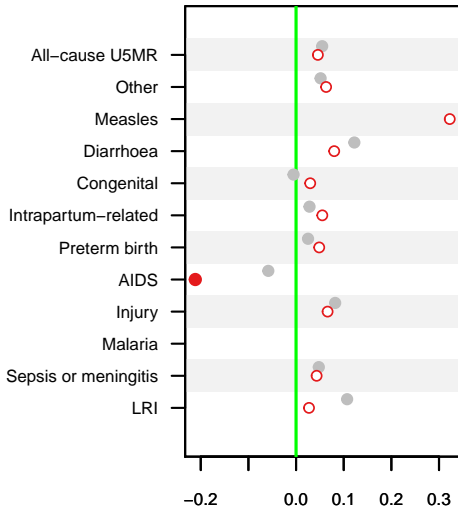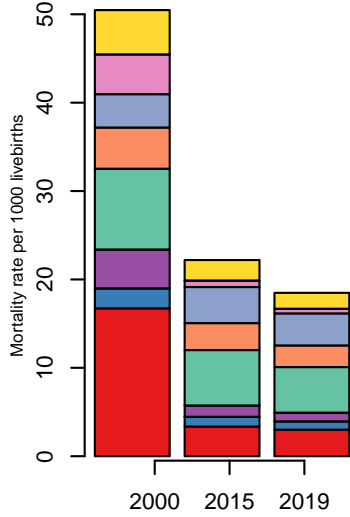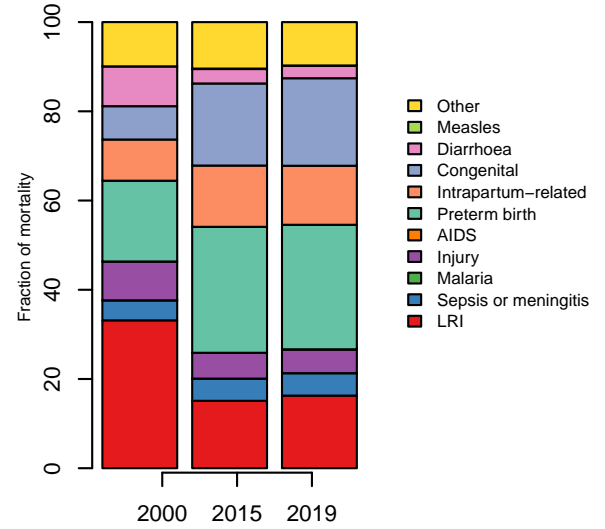

### Kyrgyzstan (Neonatal)

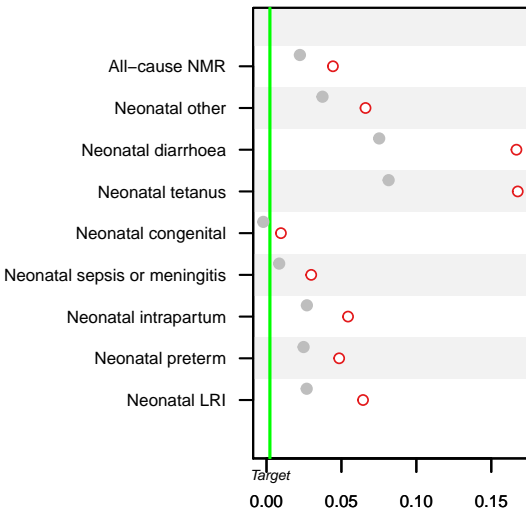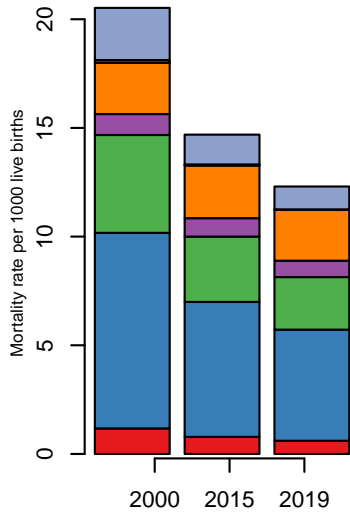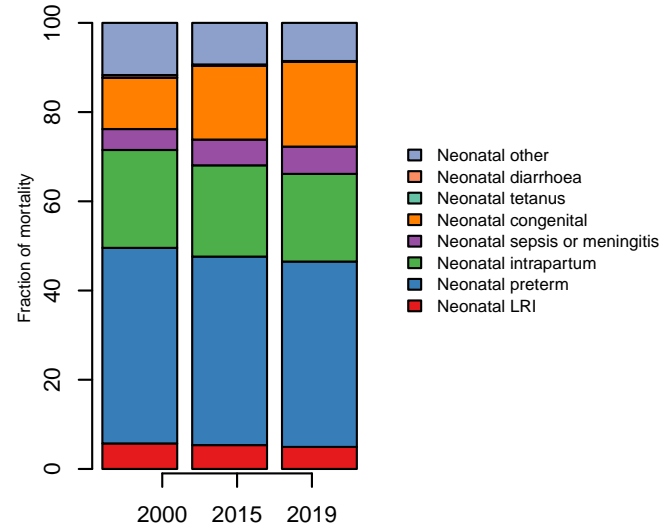

● 2000 – 2015      ● 2015 – 2019 (not on target)      → Deficit to target      ○ 2015 – 2019 (on target)

### Cambodia (Under five)

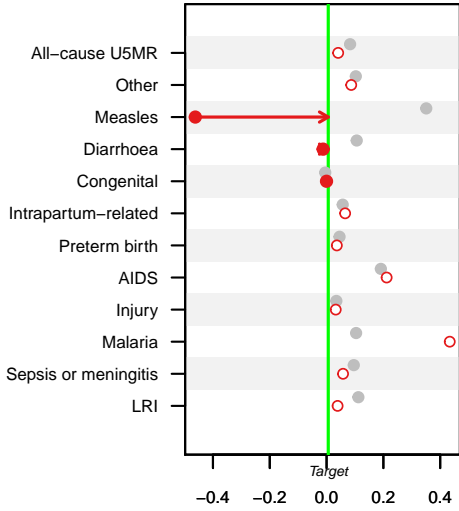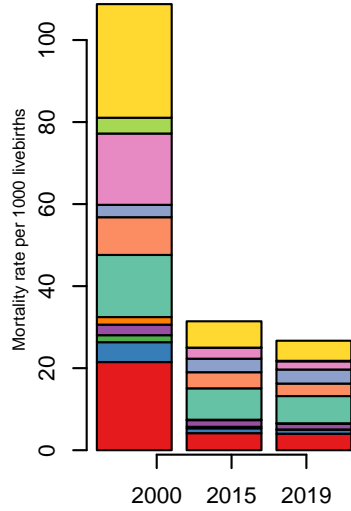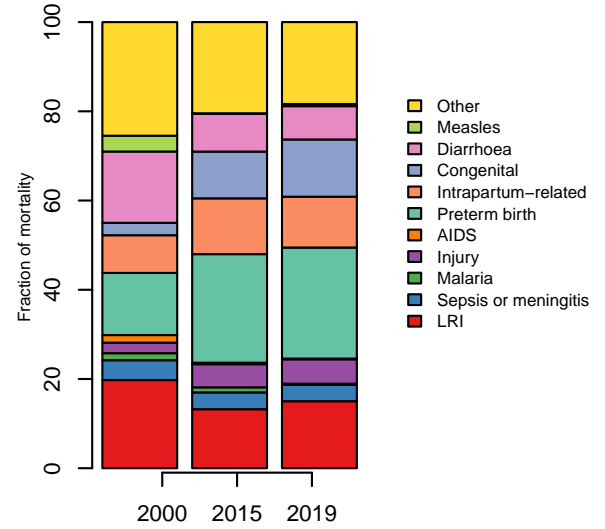

### Cambodia (Neonatal)

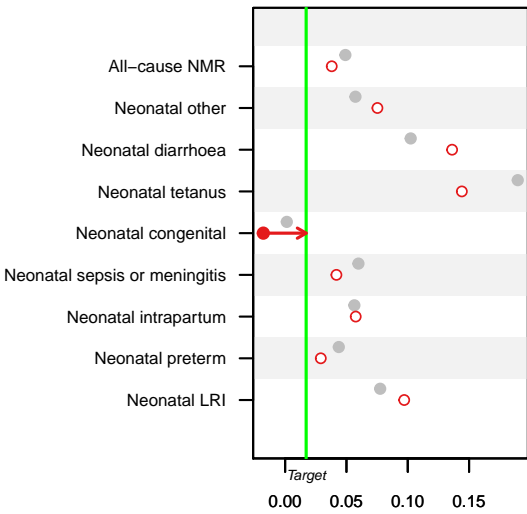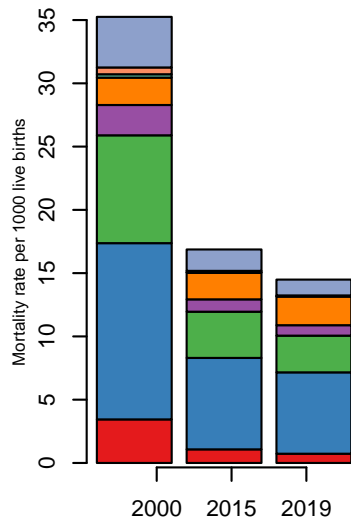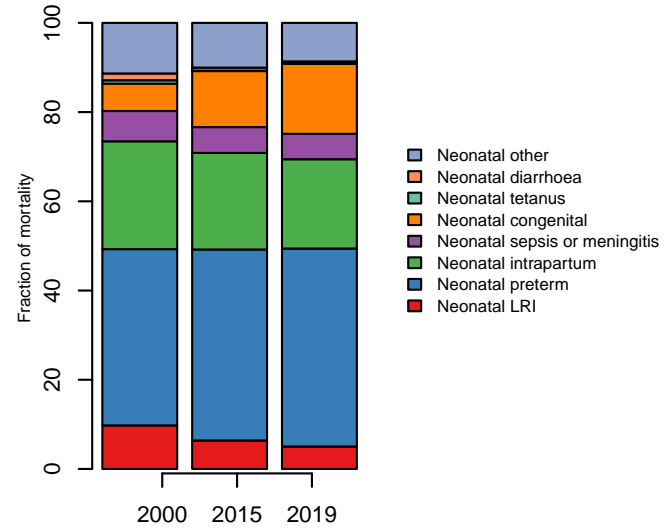

● 2000 – 2015      ● 2015 – 2019 (not on target)      → Deficit to target      ○ 2015 – 2019 (on target)

### Kiribati (Under five)

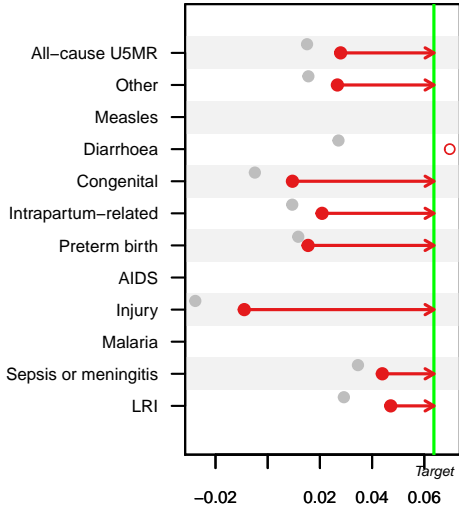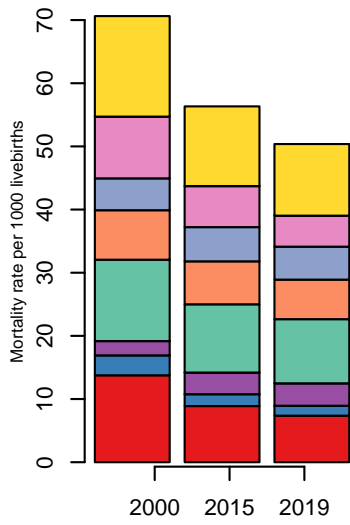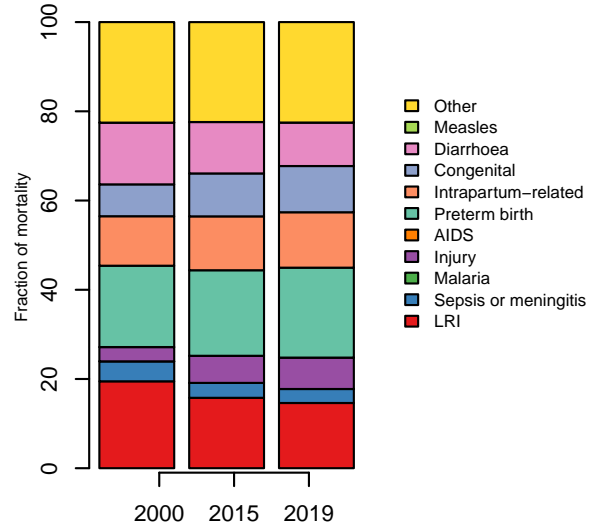

### Kiribati (Neonatal)

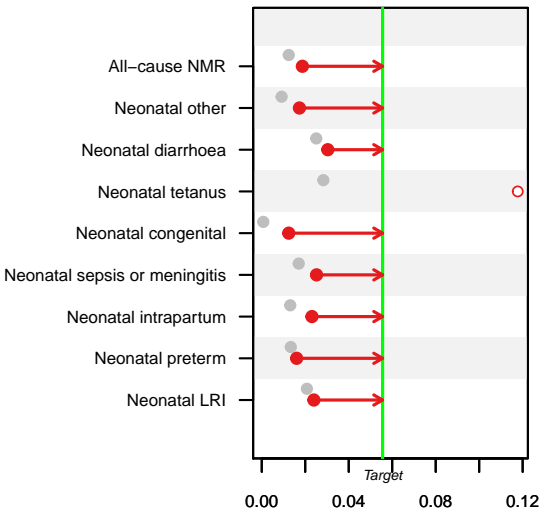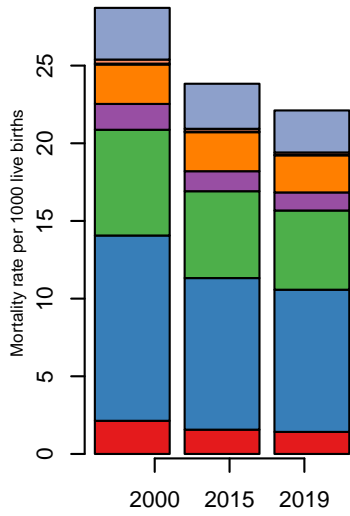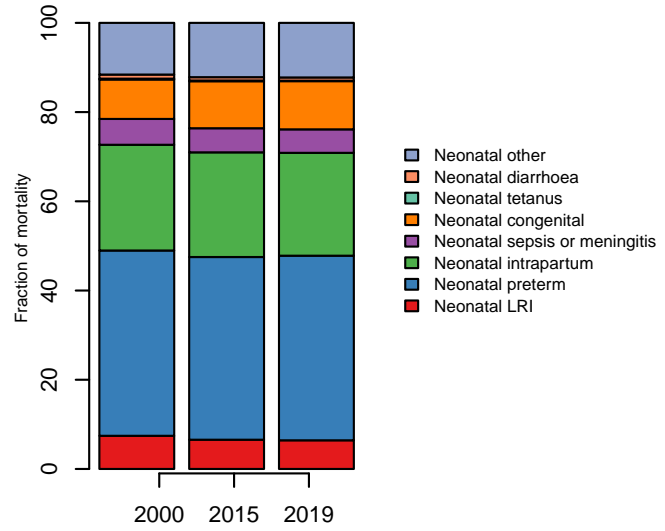

● 2000 – 2015      ● 2015 – 2019 (not on target)      → Deficit to target      ○ 2015 – 2019 (on target)

### Republic of Korea (Under five)

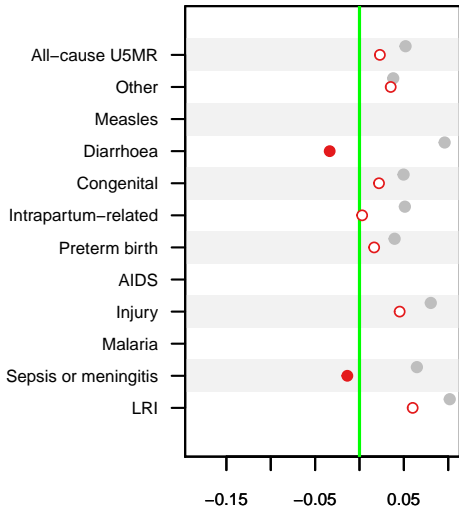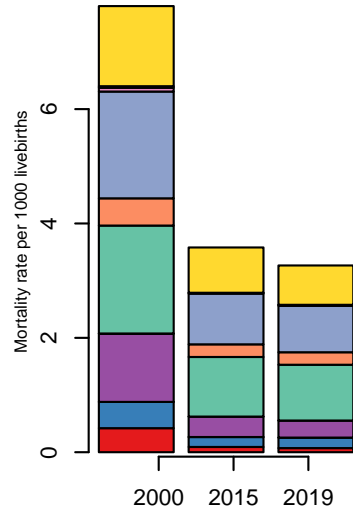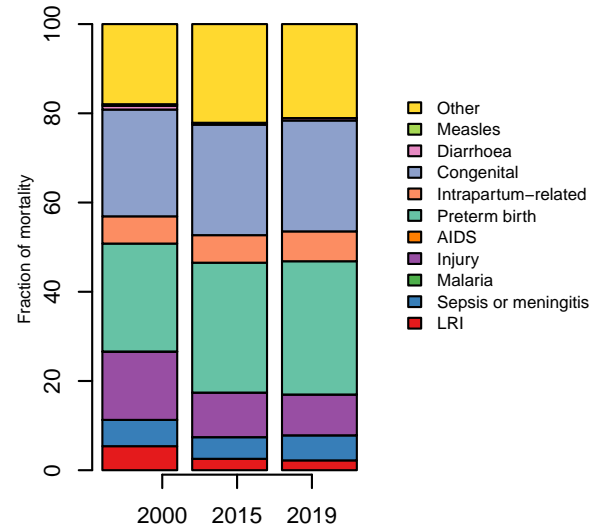

### Republic of Korea (Neonatal)

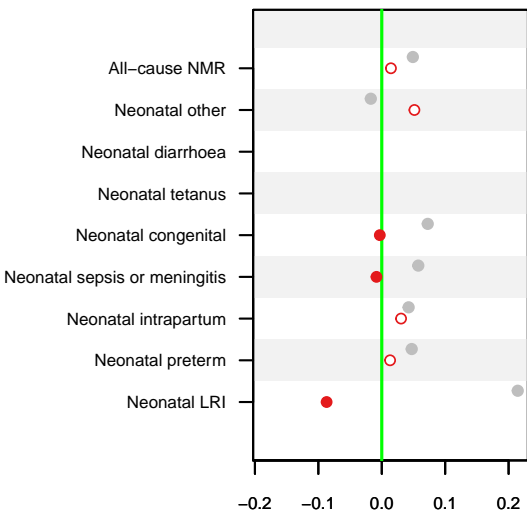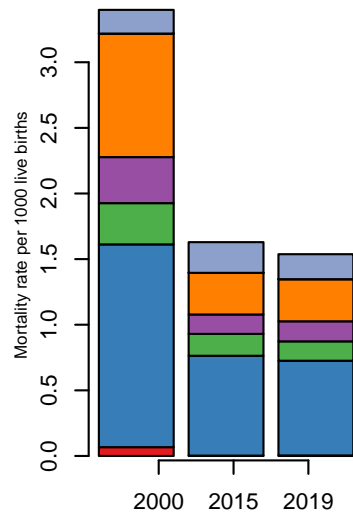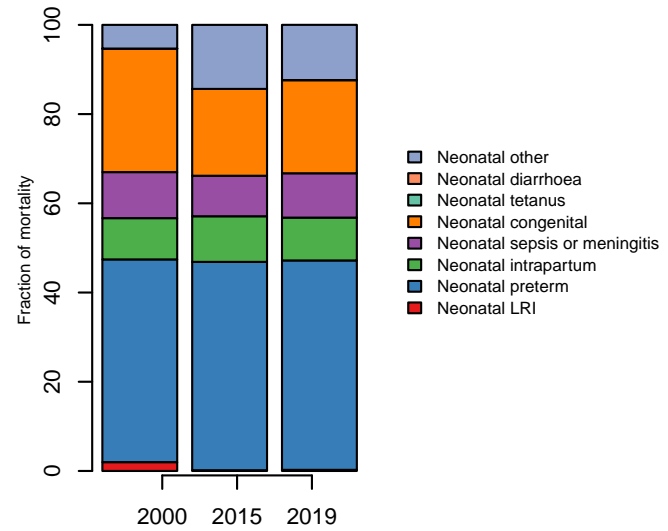

● 2000 – 2015      ● 2015 – 2019 (not on target)      → Deficit to target      ○ 2015 – 2019 (on target)

### Kuwait (Under five)

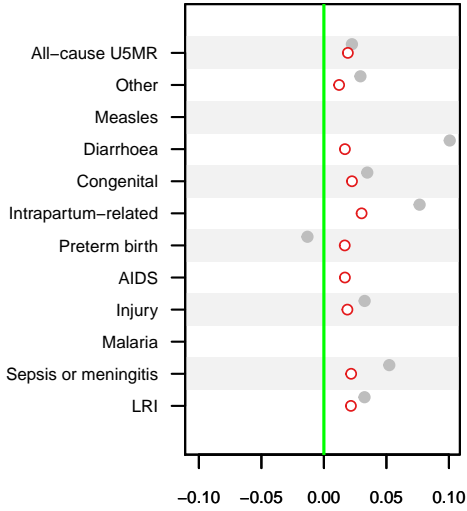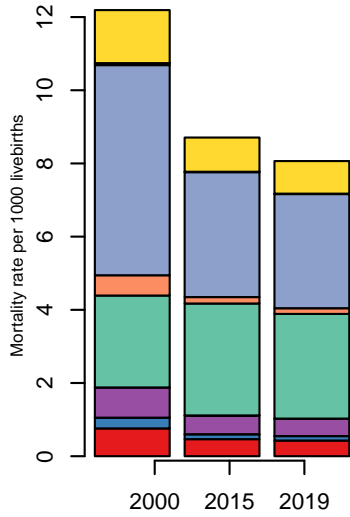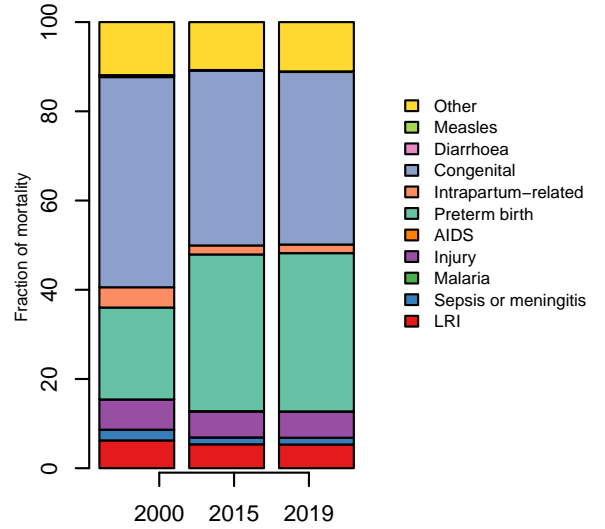

### Kuwait (Neonatal)

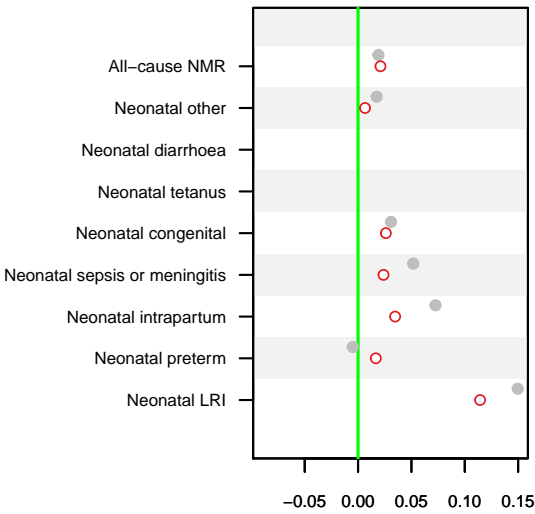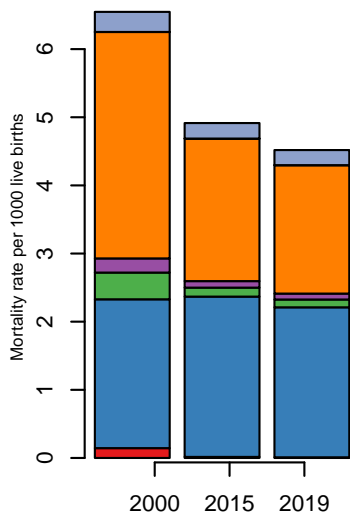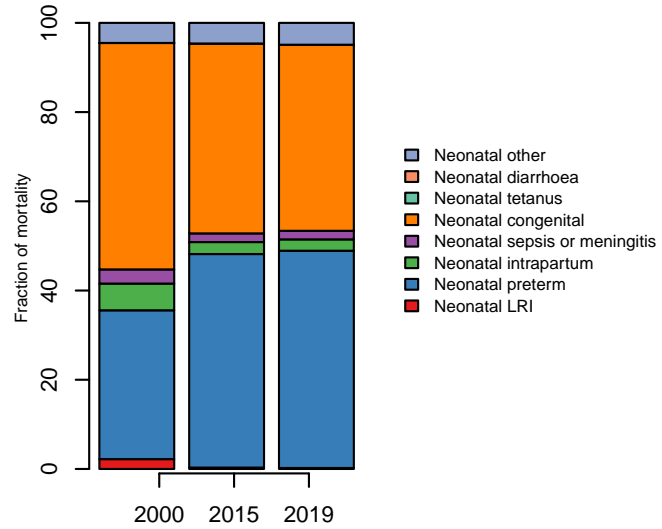

● 2000 – 2015      ● 2015 – 2019 (not on target)      → Deficit to target      ○ 2015 – 2019 (on target)



### Lao People's Democratic Republic (Under five)

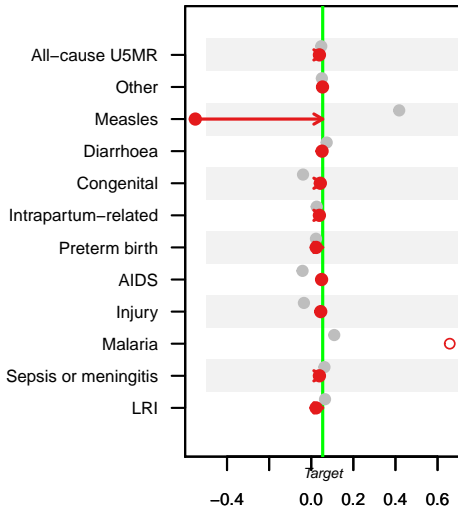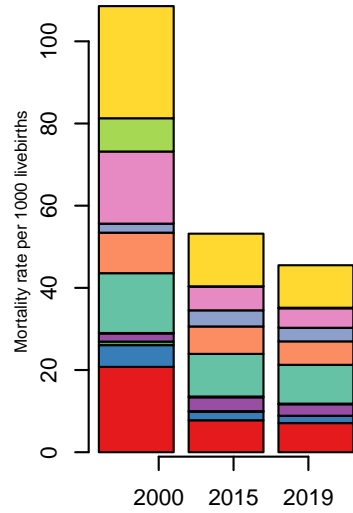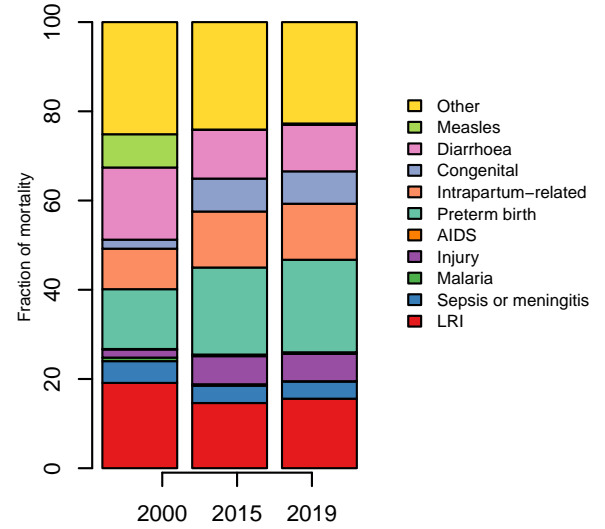

### Lao People's Democratic Republic (Neonatal)

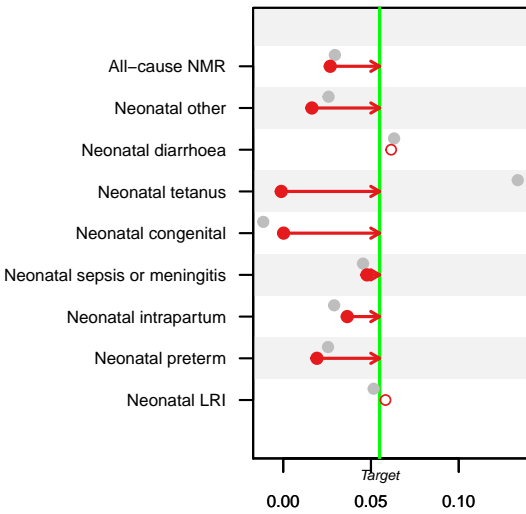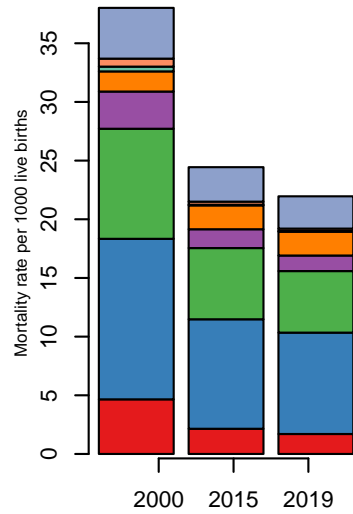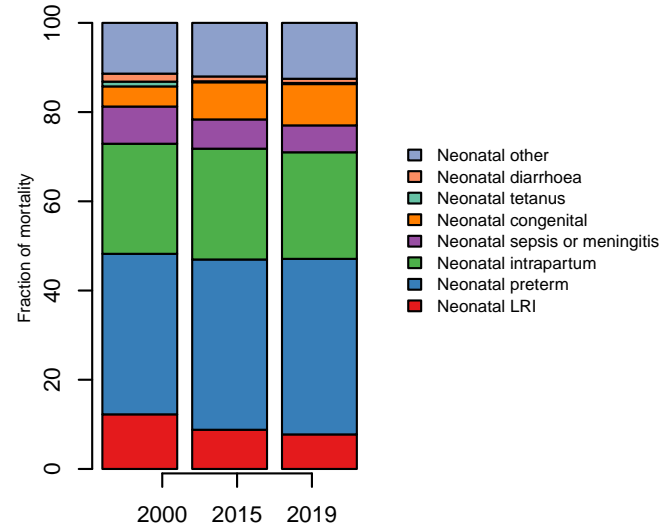

● 2000 – 2015      ● 2015 – 2019 (not on target)      → Deficit to target      ○ 2015 – 2019 (on target)

### Lebanon (Under five)

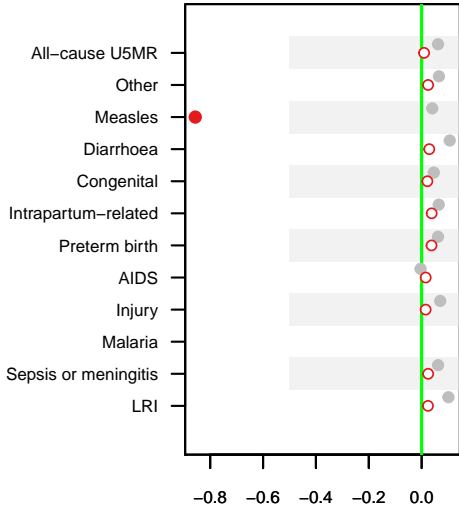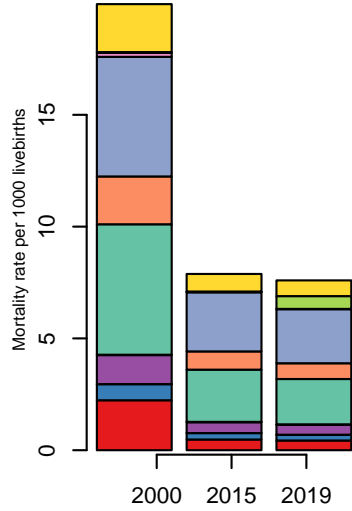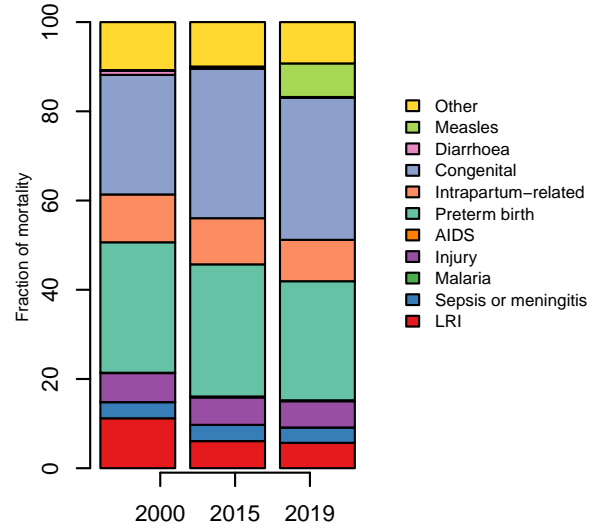

### Lebanon (Neonatal)

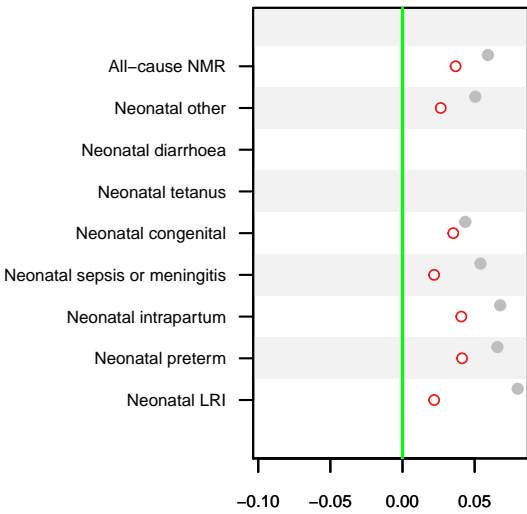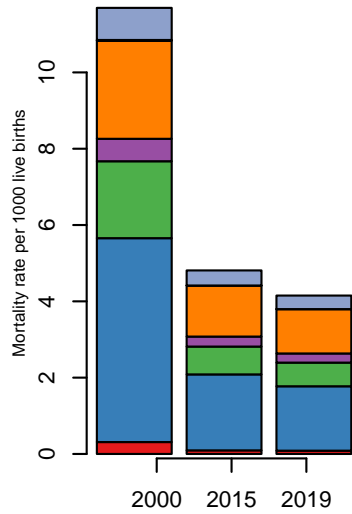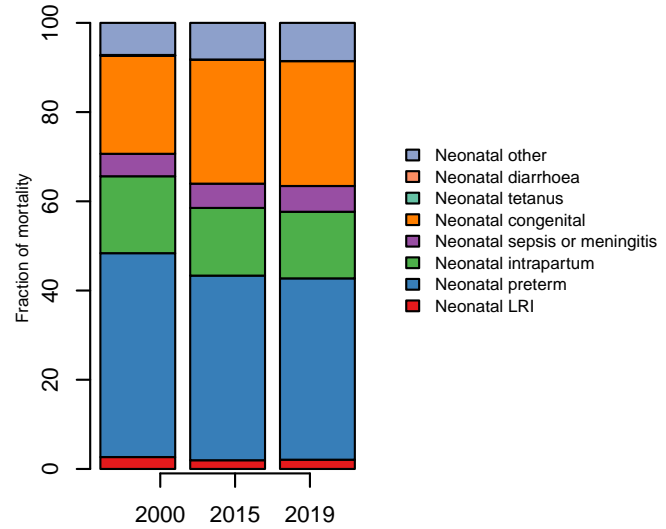

● 2000 - 2015      ● 2015 - 2019 (not on target)      → Deficit to target      ○ 2015 - 2019 (on target)

### Liberia (Under five)

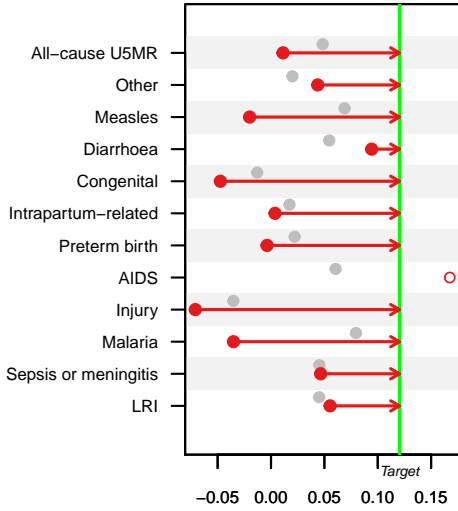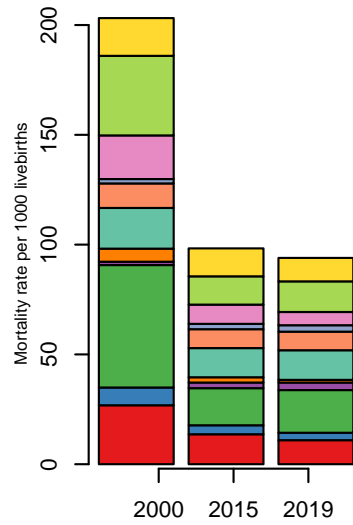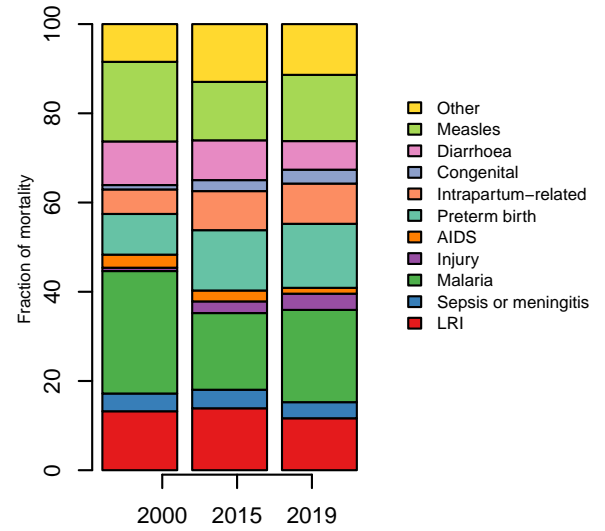

### Liberia (Neonatal)

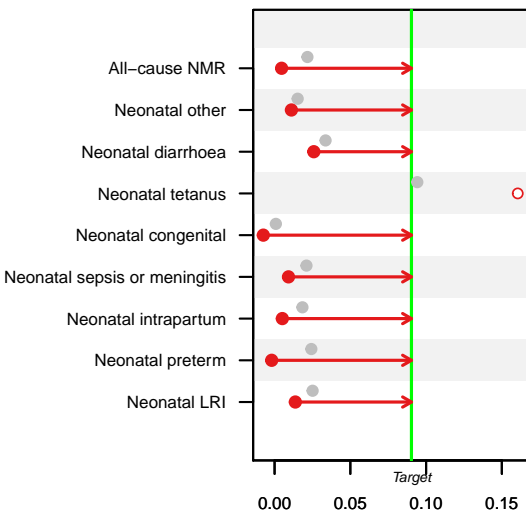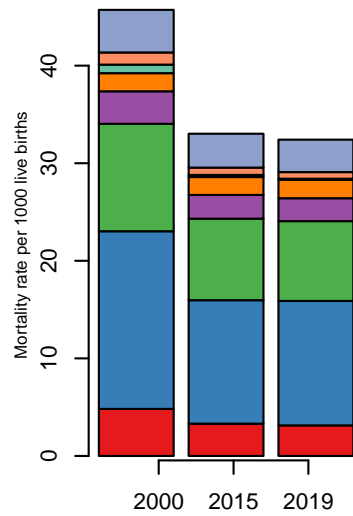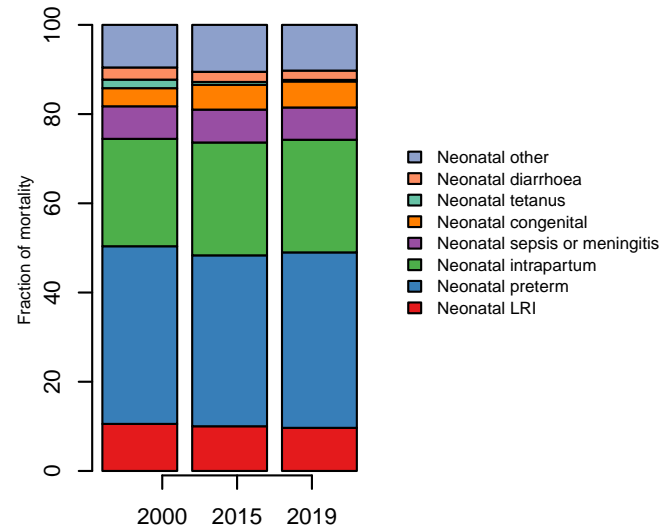

● 2000 – 2015      ● 2015 – 2019 (not on target)      → Deficit to target      ○ 2015 – 2019 (on target)

### Libya (Under five)

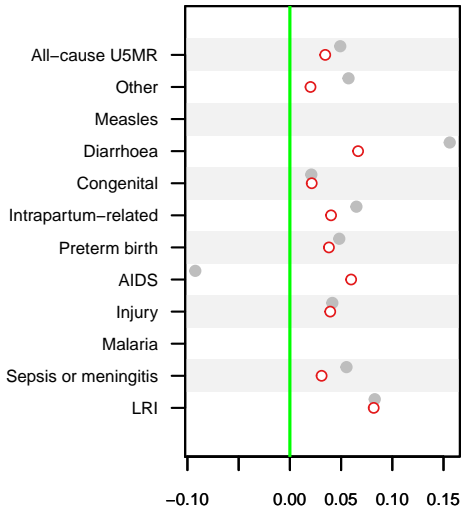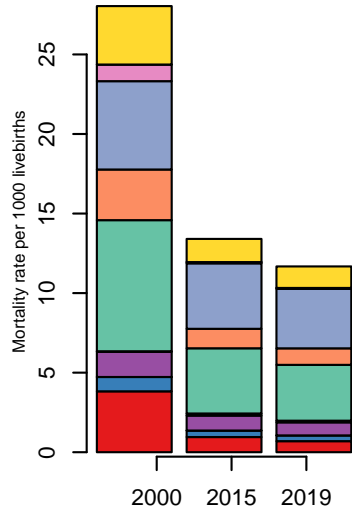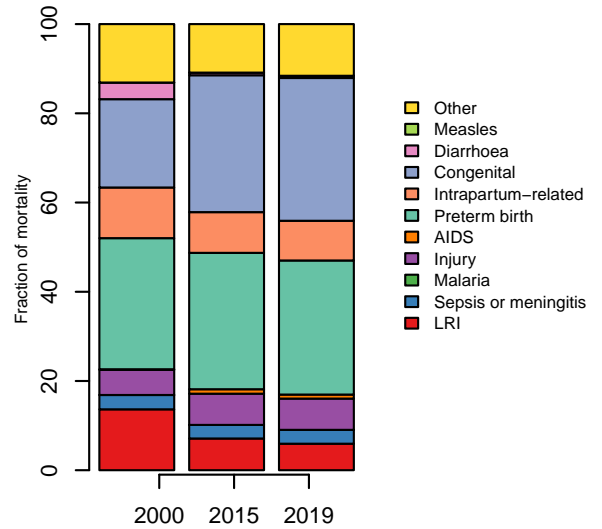

### Libya (Neonatal)

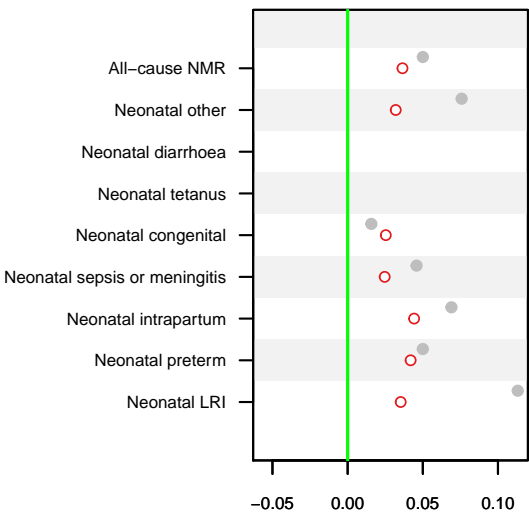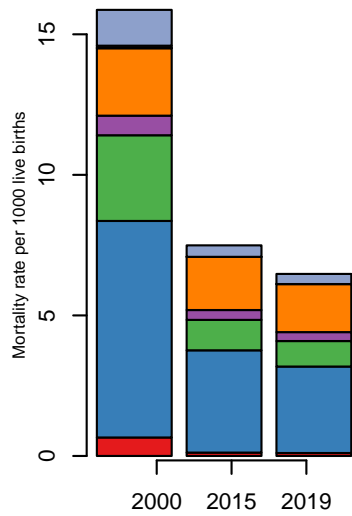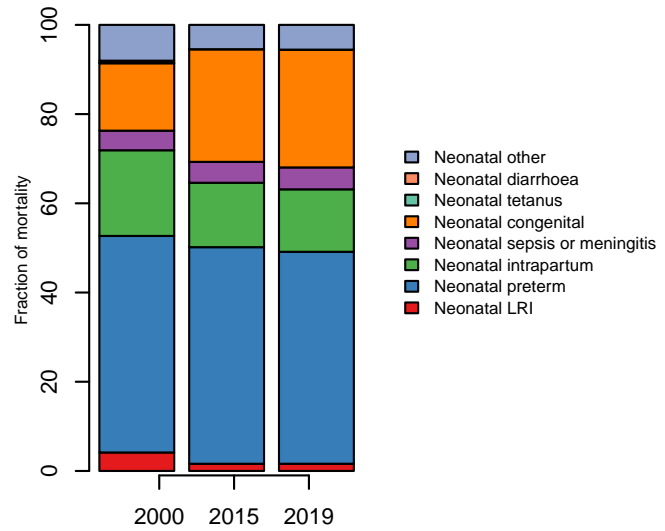

● 2000 – 2015      ● 2015 – 2019 (not on target)      → Deficit to target      ○ 2015 – 2019 (on target)

### Sri Lanka (Under five)

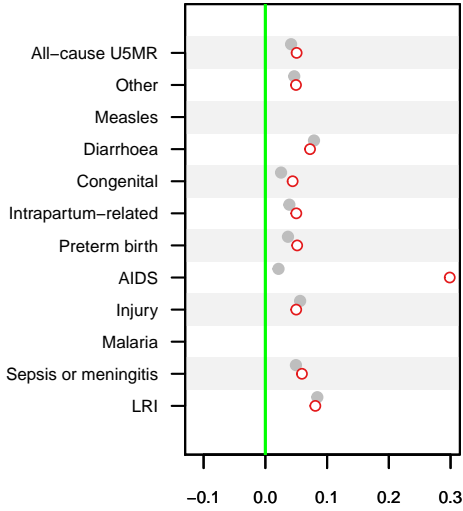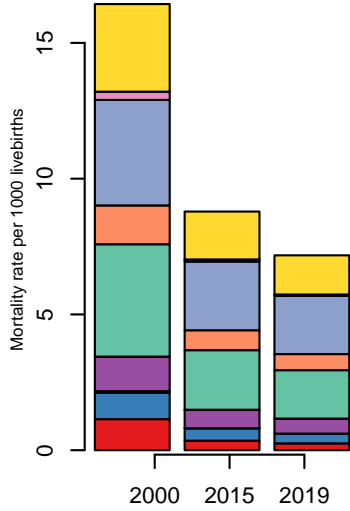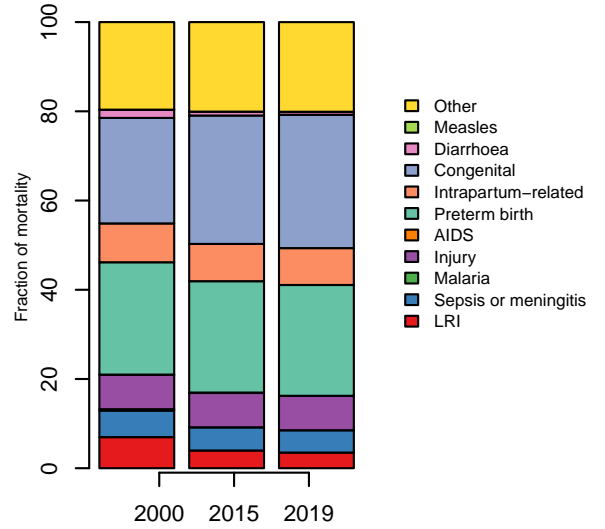

### Sri Lanka (Neonatal)

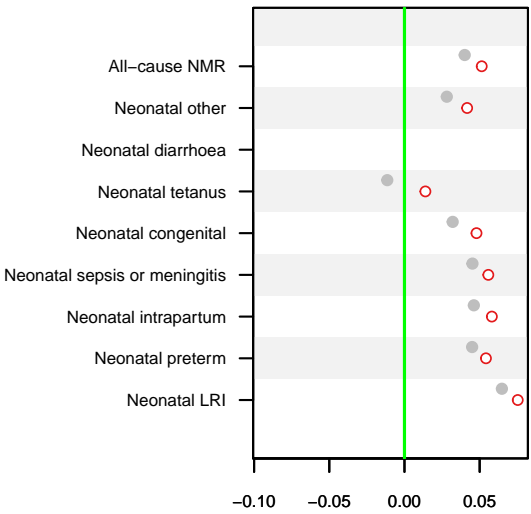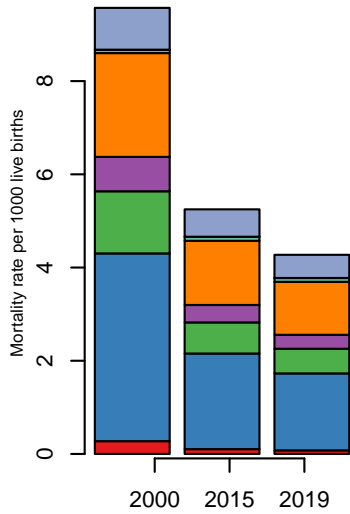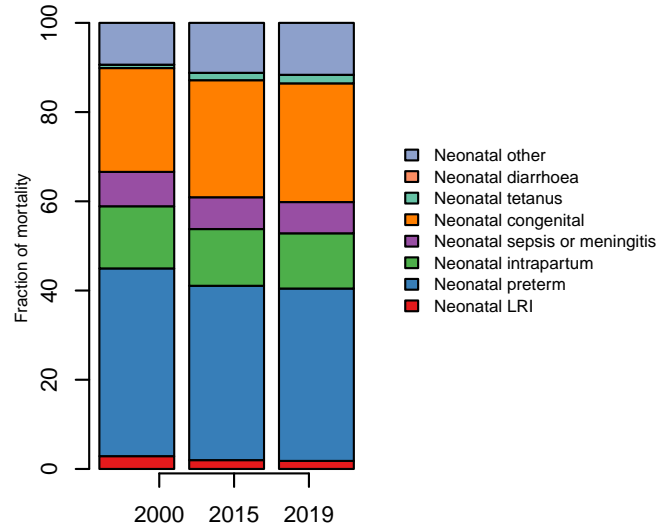

● 2000 – 2015      ● 2015 – 2019 (not on target)      → Deficit to target      ○ 2015 – 2019 (on target)

### Lesotho (Under five)

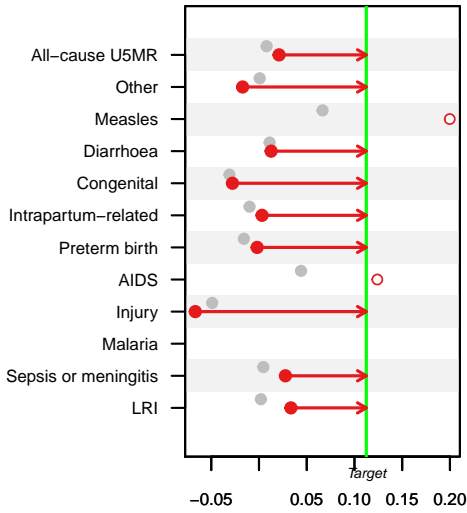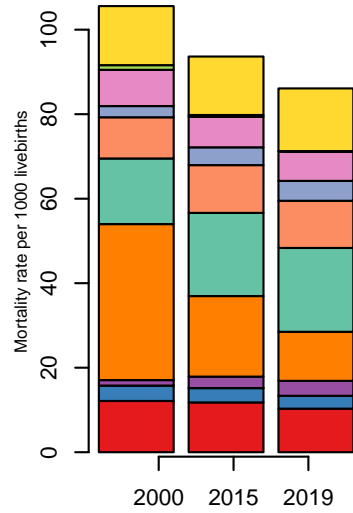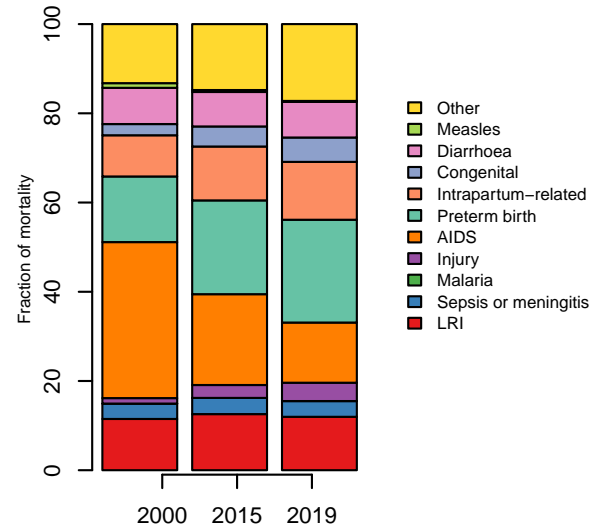

### Lesotho (Neonatal)

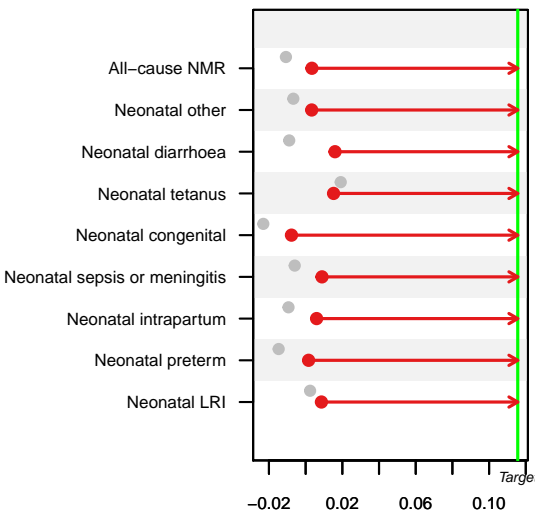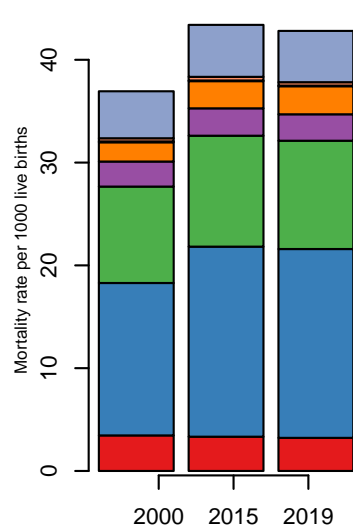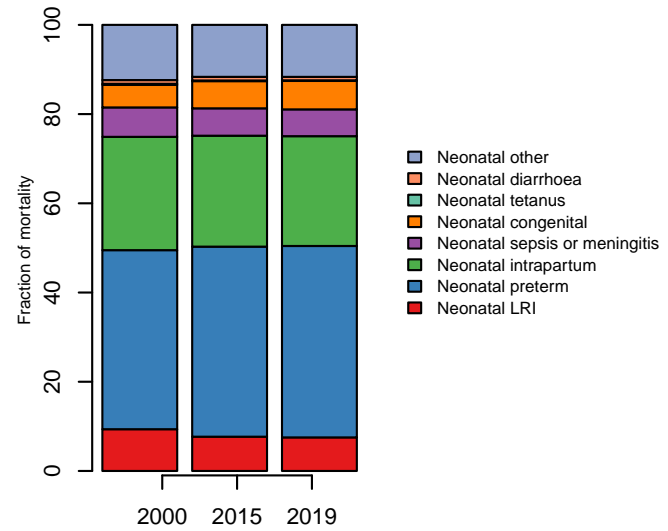

● 2000 – 2015      ● 2015 – 2019 (not on target)      → Deficit to target      ○ 2015 – 2019 (on target)

### Lithuania (Under five)

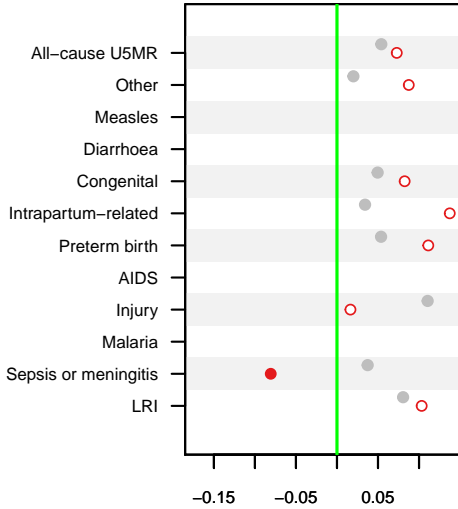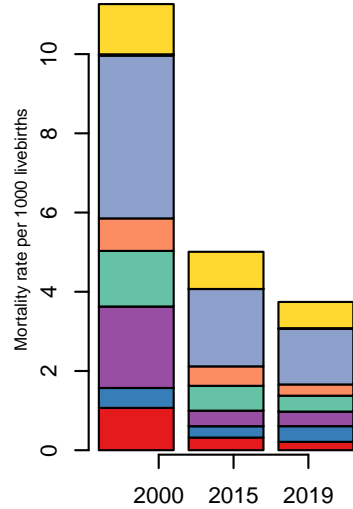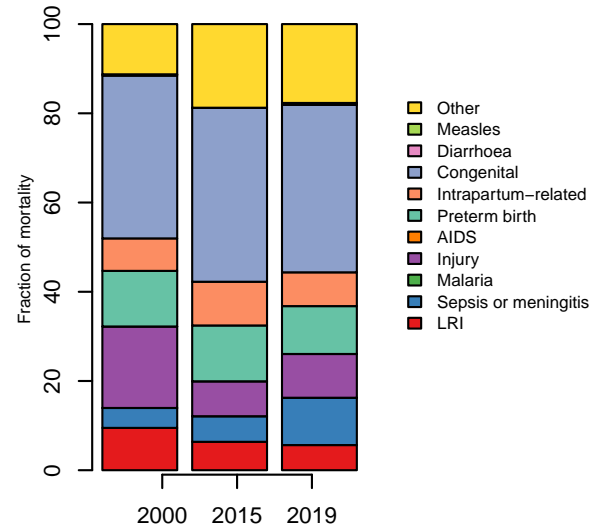

### Lithuania (Neonatal)

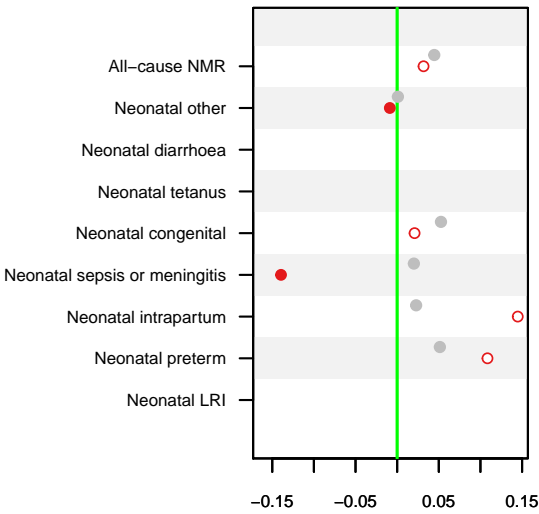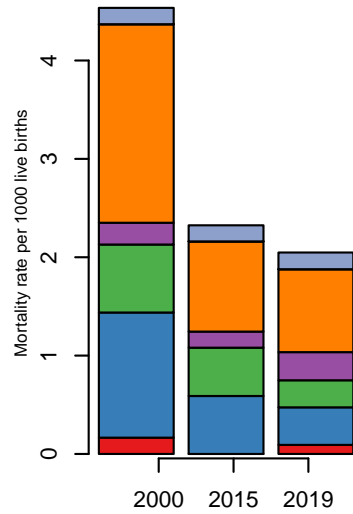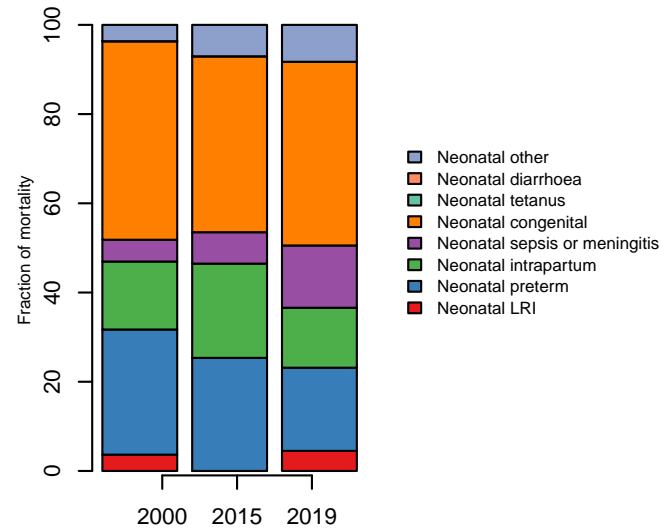

● 2000 – 2015      ● 2015 – 2019 (not on target)      → Deficit to target      ○ 2015 – 2019 (on target)

### Latvia (Under five)

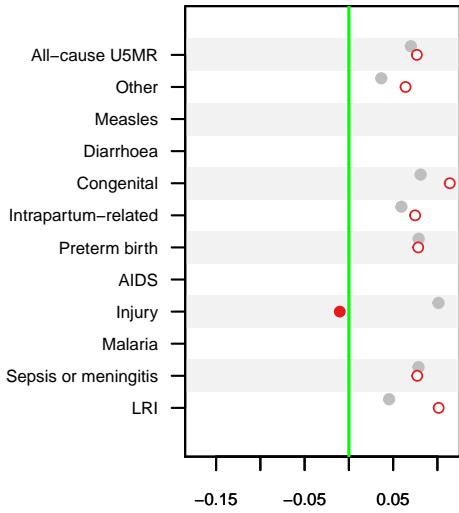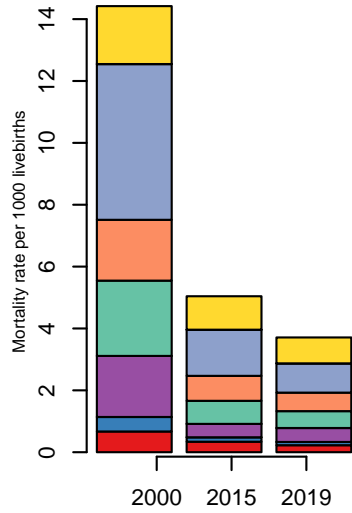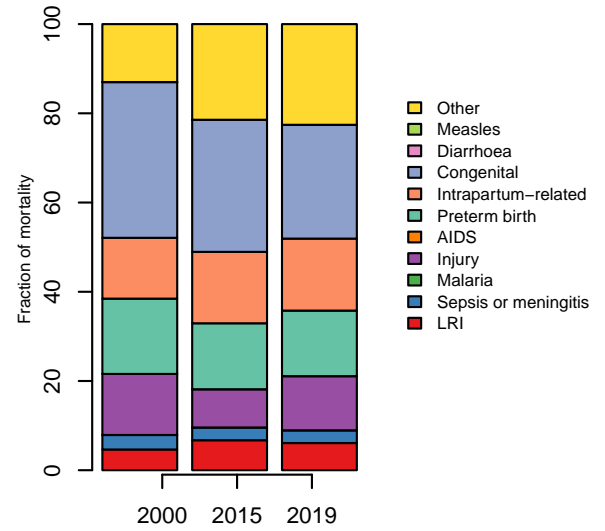

### Latvia (Neonatal)

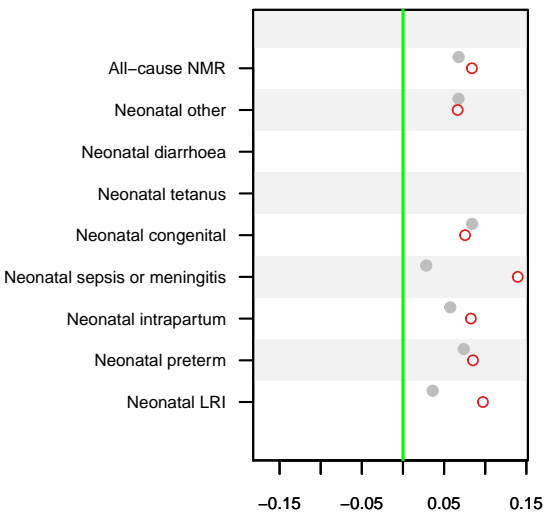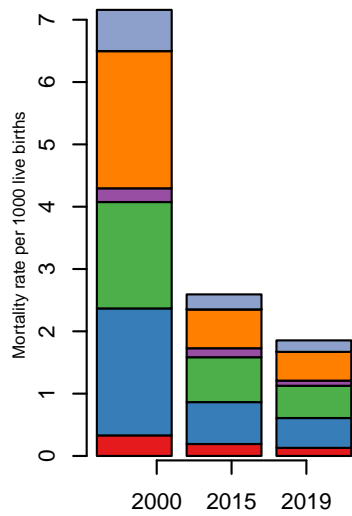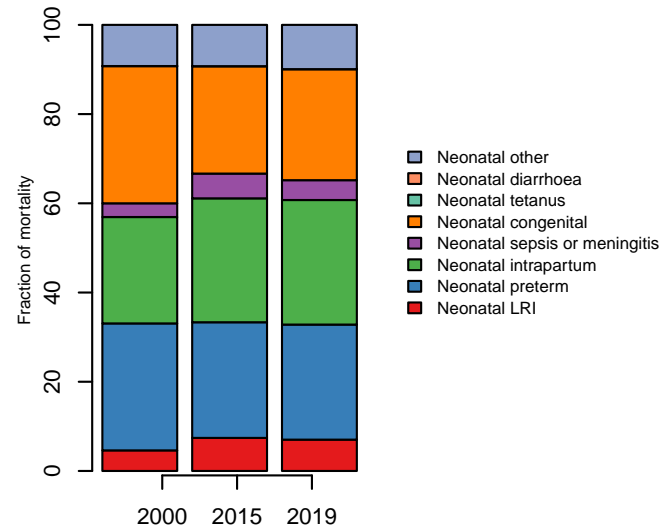

● 2000 – 2015      ● 2015 – 2019 (not on target)      → Deficit to target      ○ 2015 – 2019 (on target)



### Morocco (Under five)

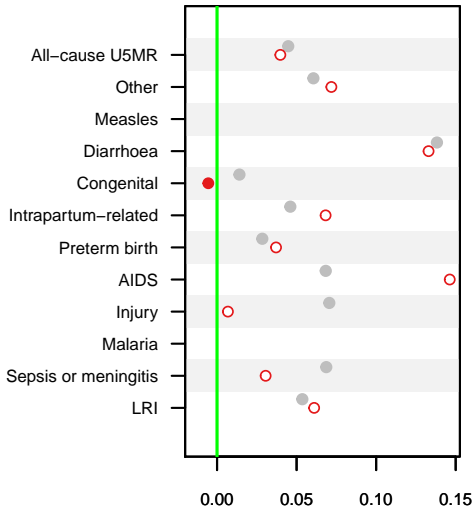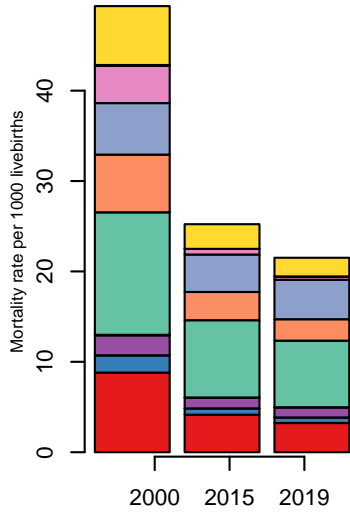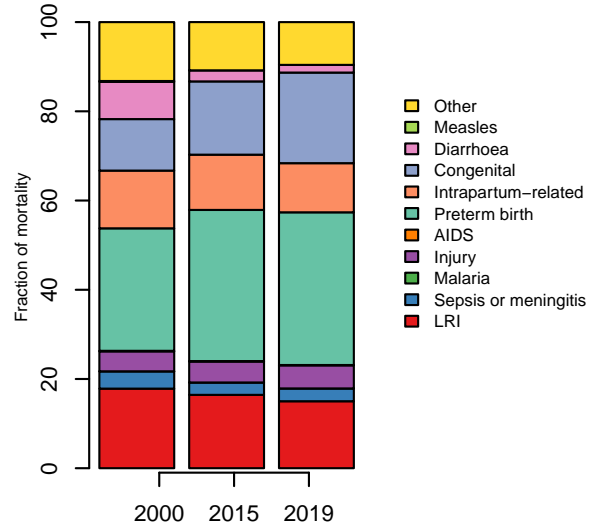

### Morocco (Neonatal)

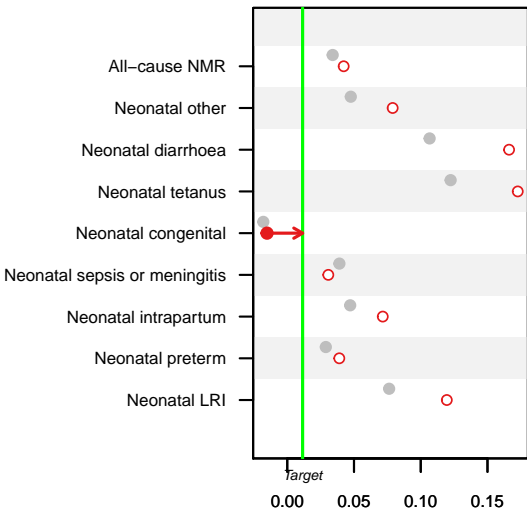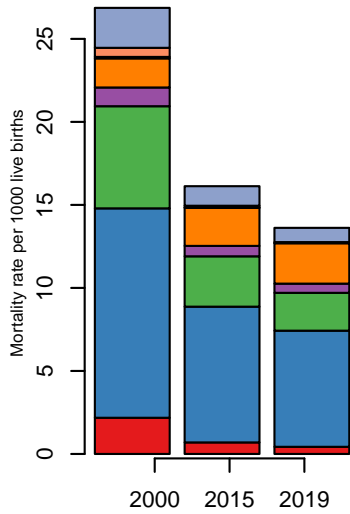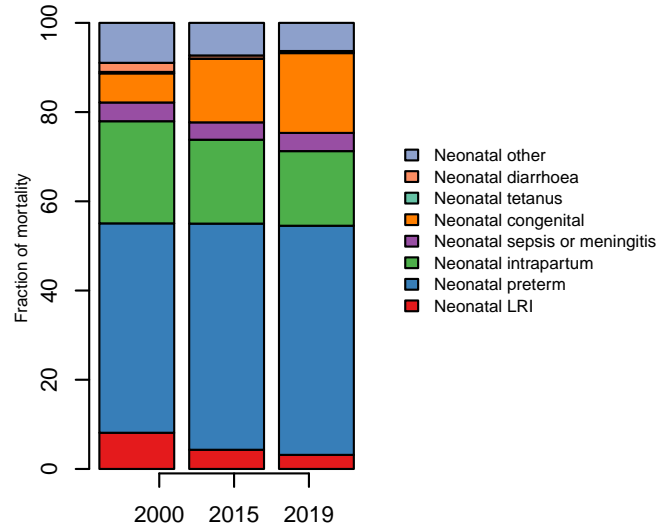

● 2000 – 2015      ● 2015 – 2019 (not on target)      → Deficit to target      ○ 2015 – 2019 (on target)

### Republic of Moldova (Under five)

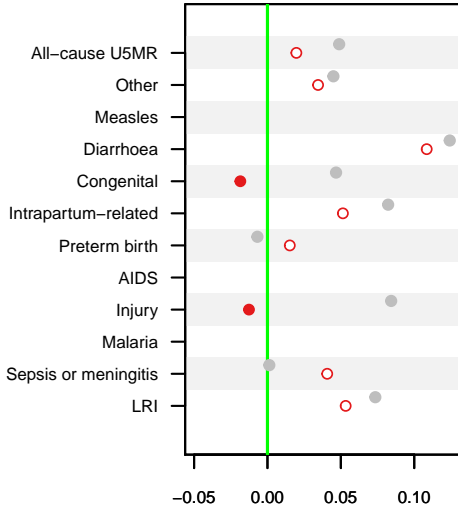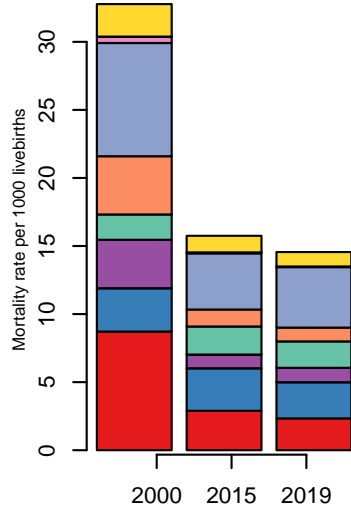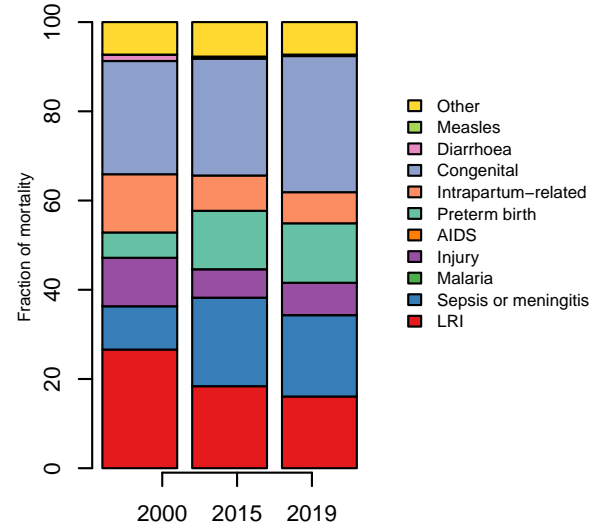

### Republic of Moldova (Neonatal)

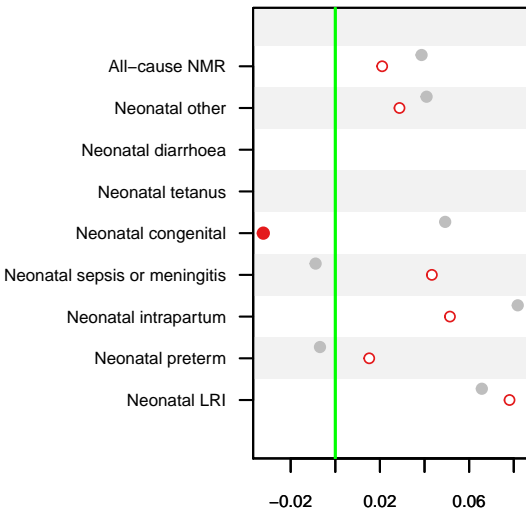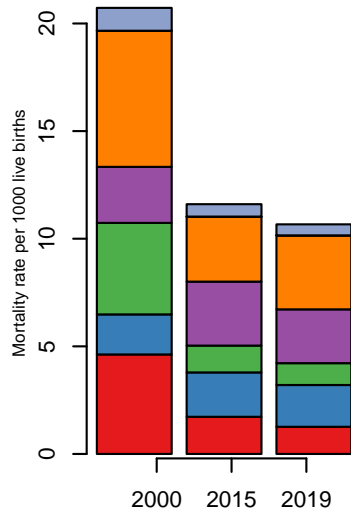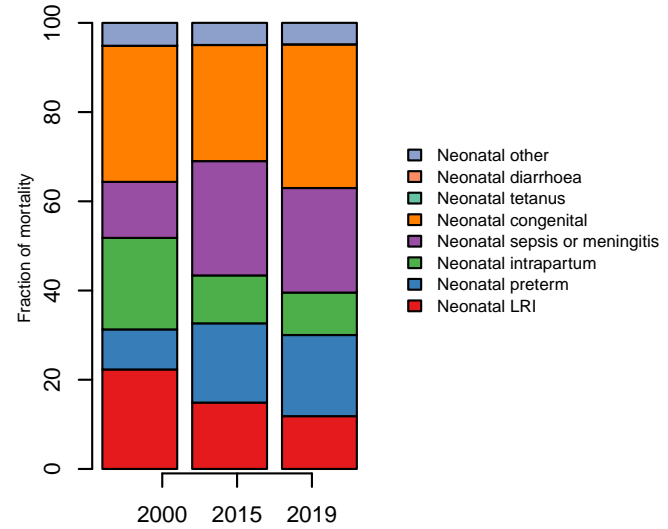

● 2000 - 2015      ● 2015 - 2019 (not on target)      → Deficit to target      ○ 2015 - 2019 (on target)

### Madagascar (Under five)

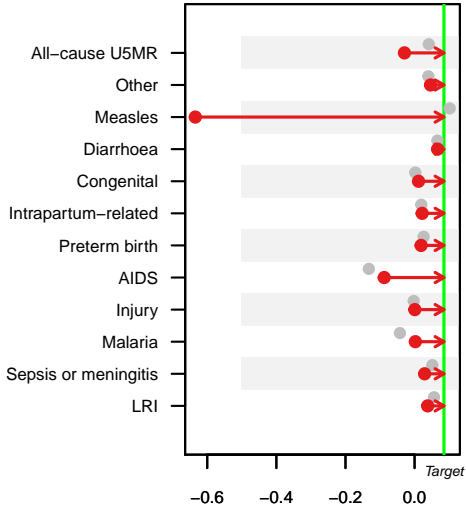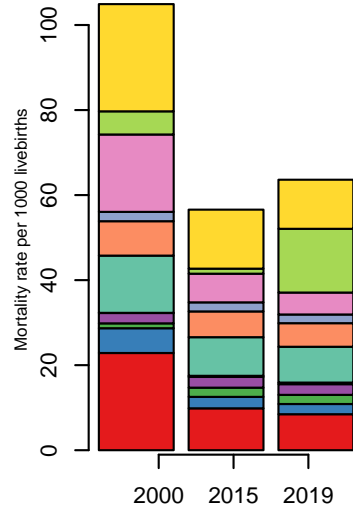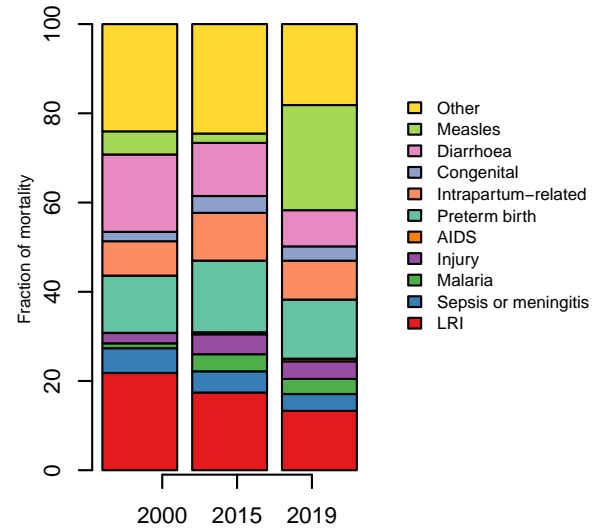

### Madagascar (Neonatal)

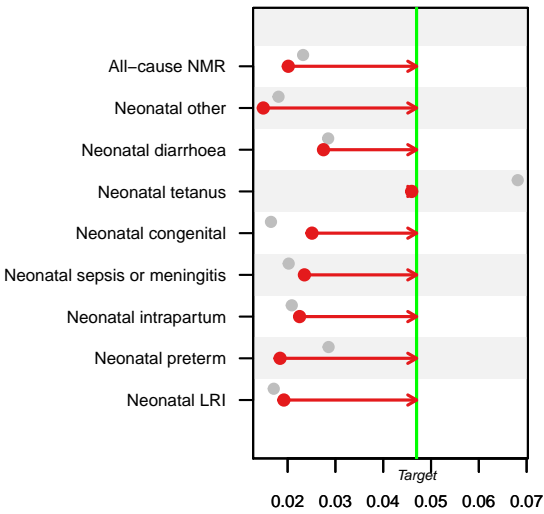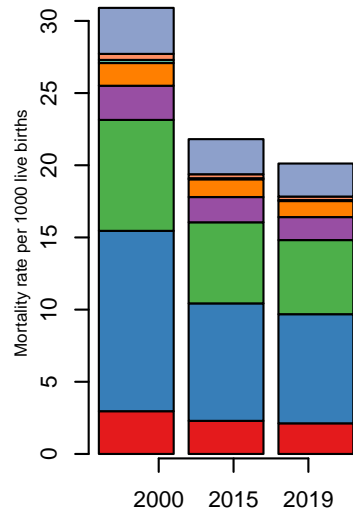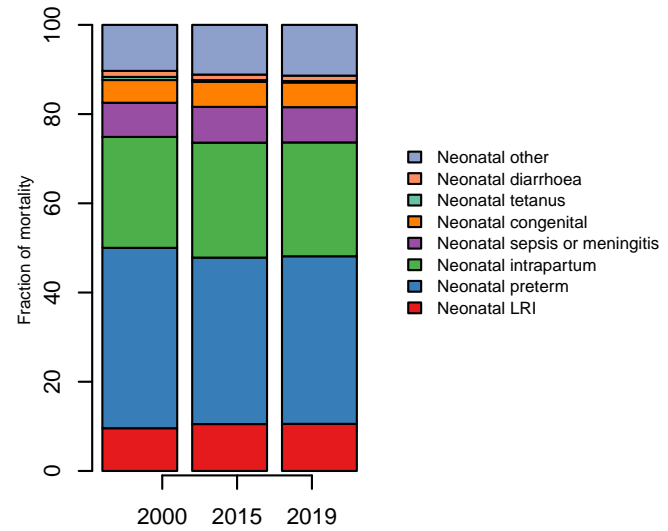

● 2000 – 2015      ● 2015 – 2019 (not on target)      → Deficit to target      ○ 2015 – 2019 (on target)

### Maldives (Under five)

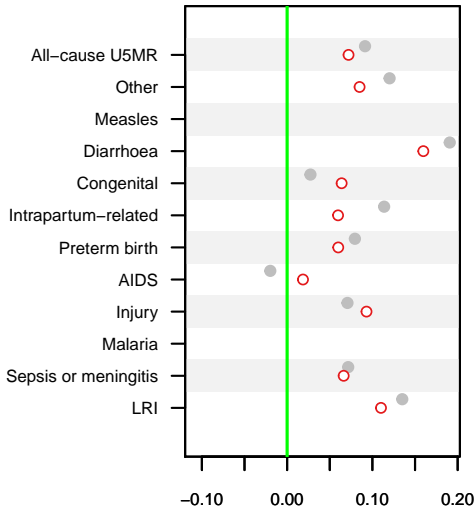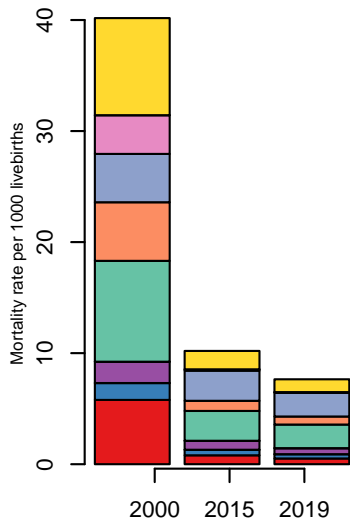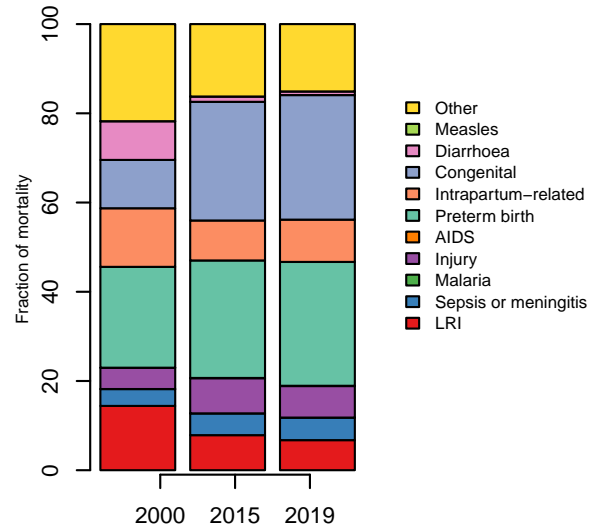

### Maldives (Neonatal)

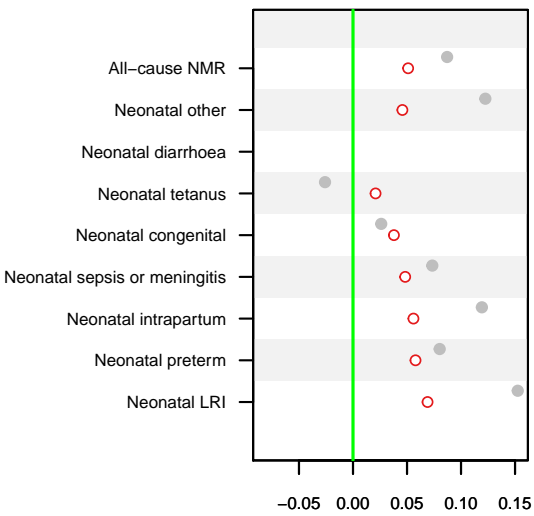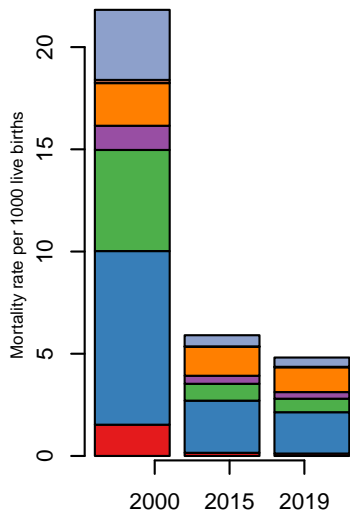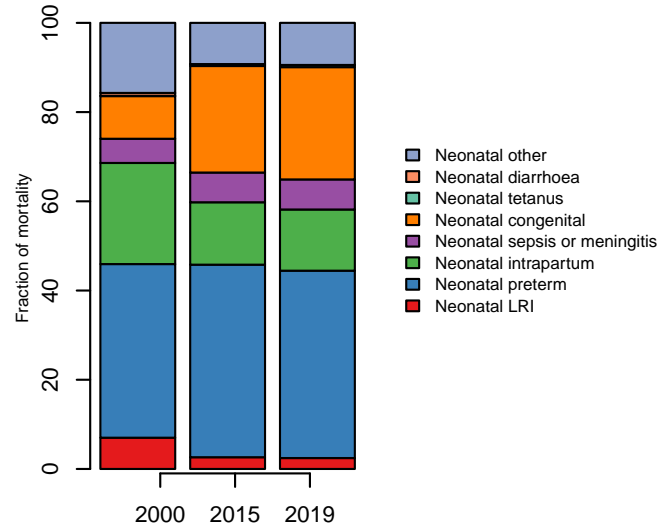

● 2000 – 2015      ● 2015 – 2019 (not on target)      → Deficit to target      ○ 2015 – 2019 (on target)

### Mexico (Under five)

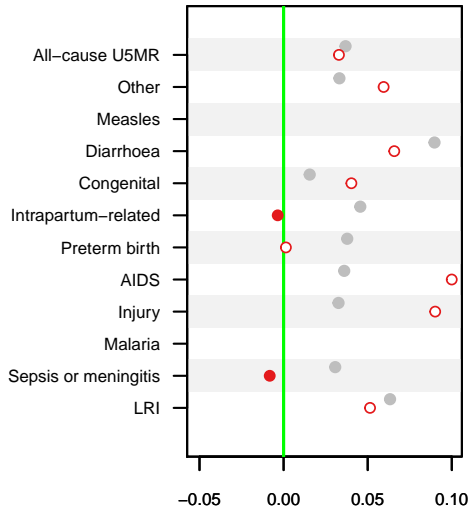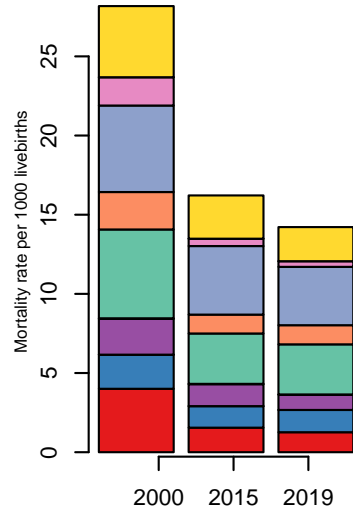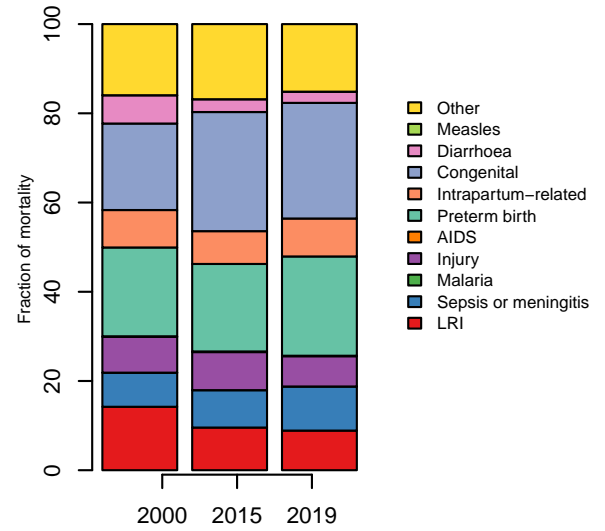

### Mexico (Neonatal)

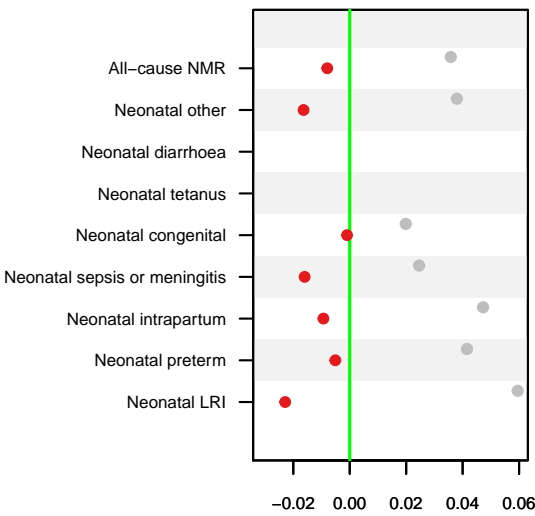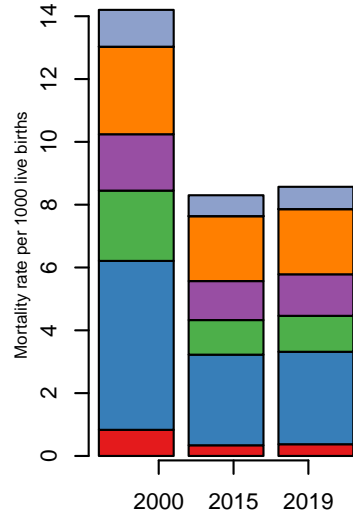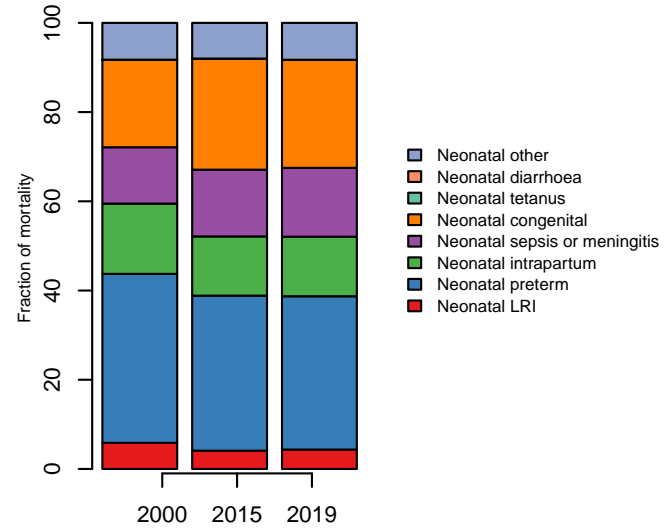

● 2000 – 2015      ● 2015 – 2019 (not on target)      → Deficit to target      ○ 2015 – 2019 (on target)

### Republic of North Macedonia (Under five)

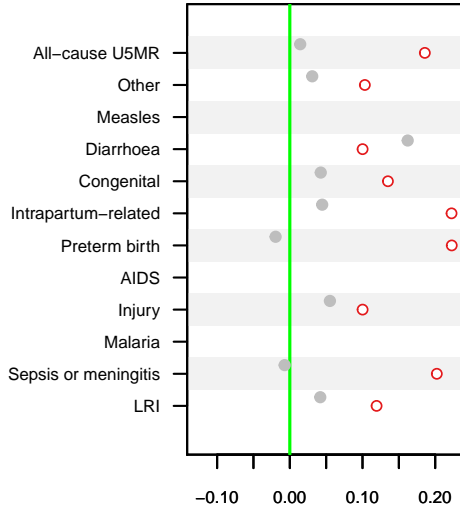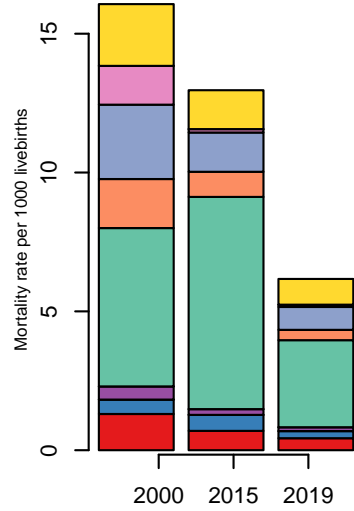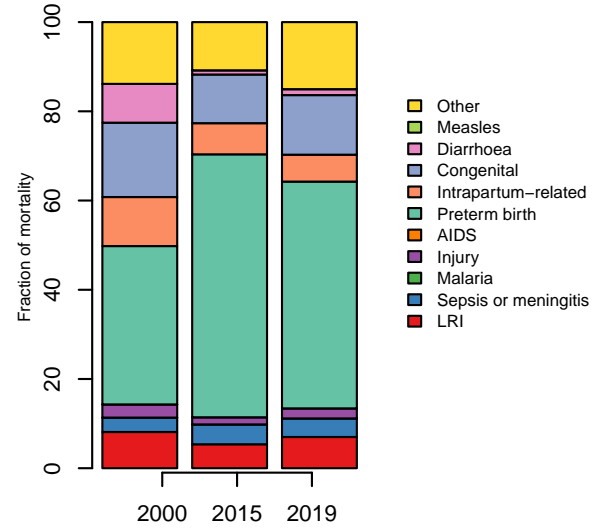

### Republic of North Macedonia (Neonatal)

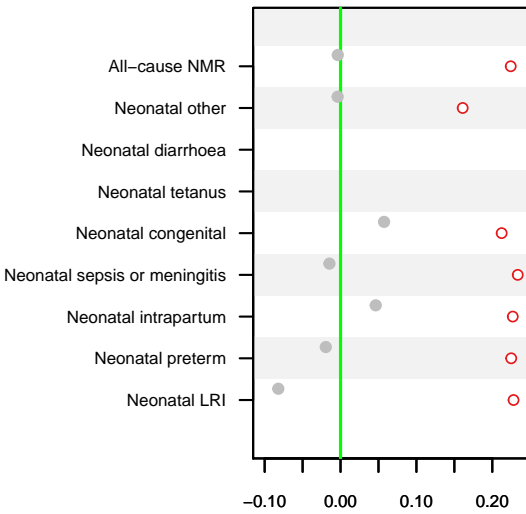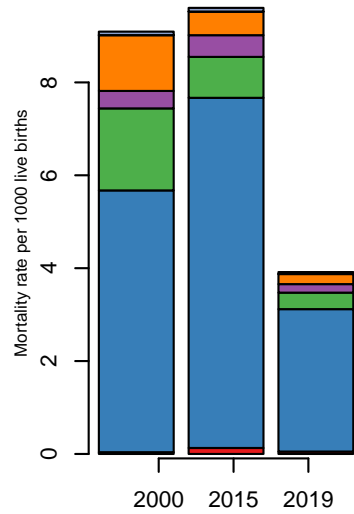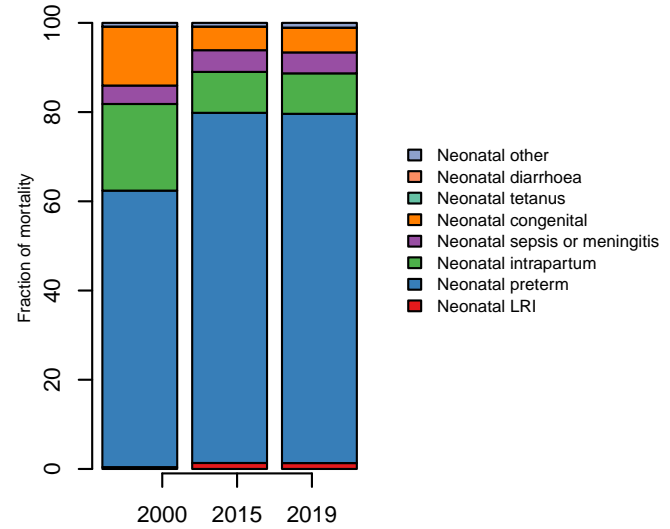

● 2000 - 2015      ● 2015 - 2019 (not on target)      → Deficit to target      ○ 2015 - 2019 (on target)

### Mali (Under five)

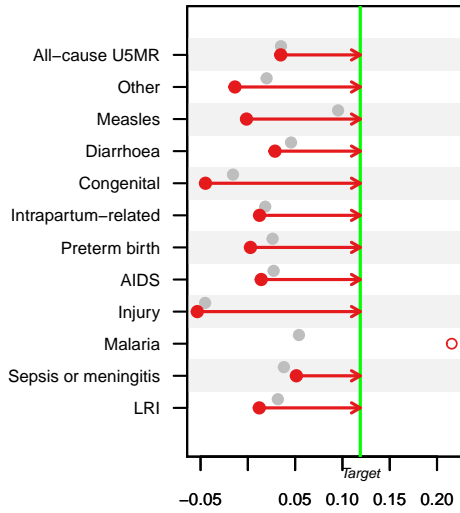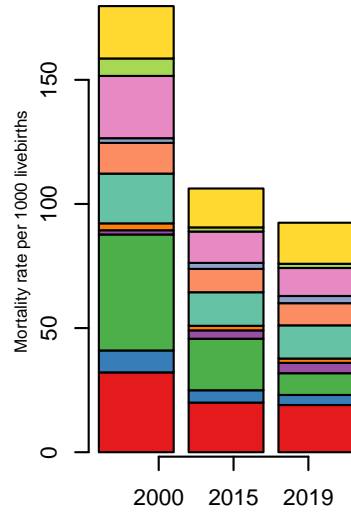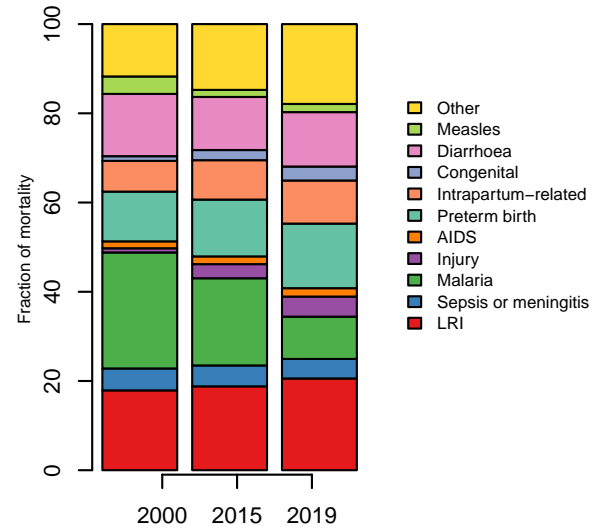

### Mali (Neonatal)

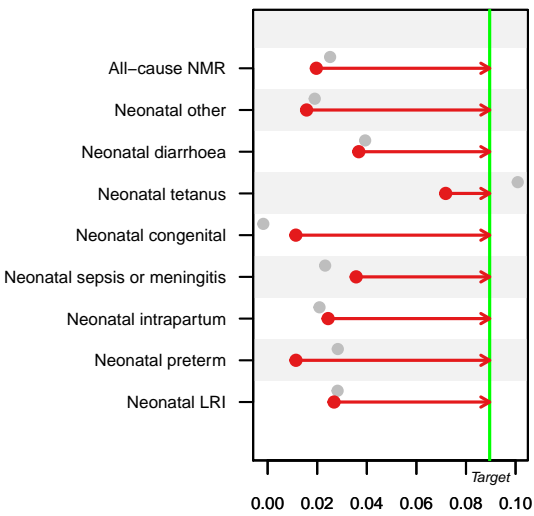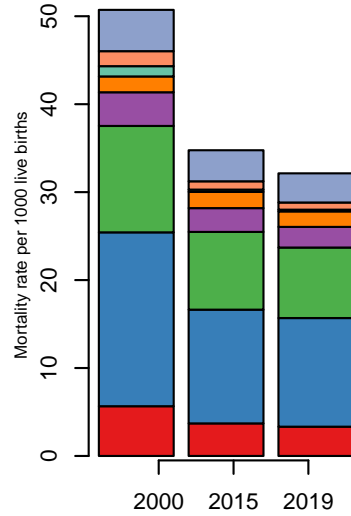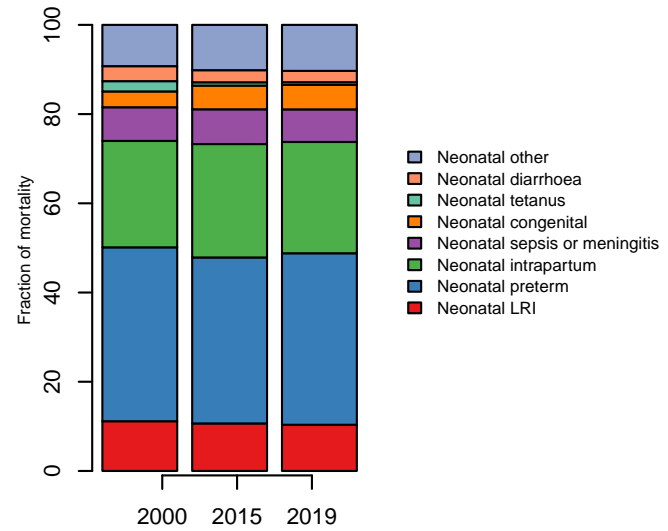

● 2000 – 2015      ● 2015 – 2019 (not on target)      → Deficit to target      ○ 2015 – 2019 (on target)

### Myanmar (Under five)

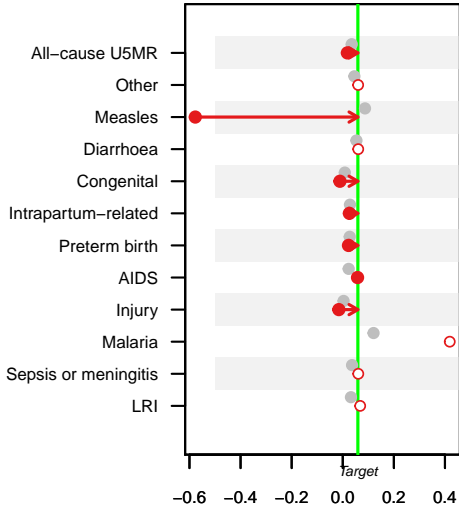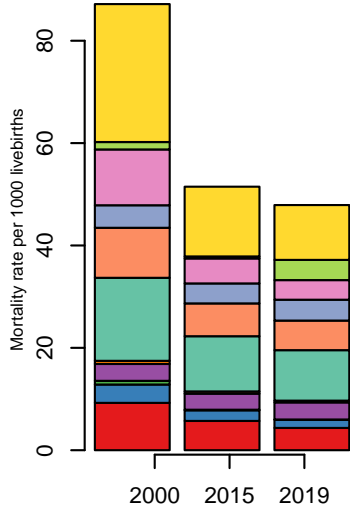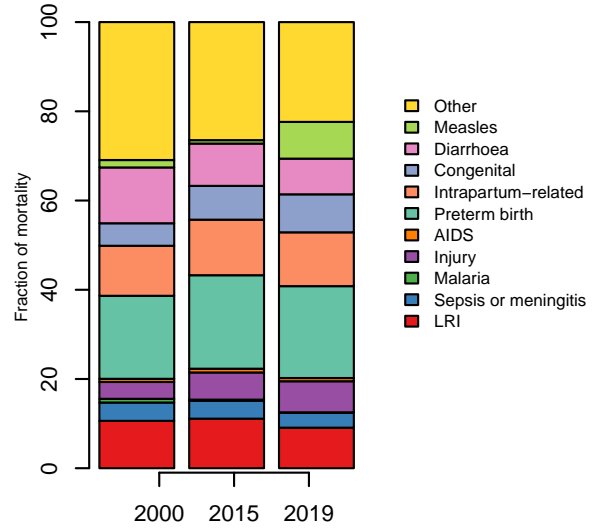

### Myanmar (Neonatal)

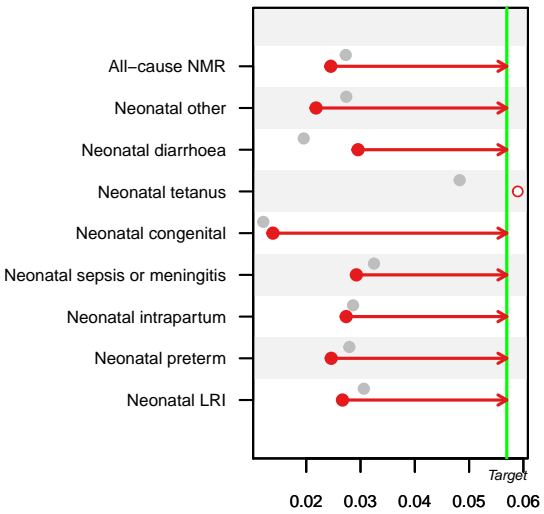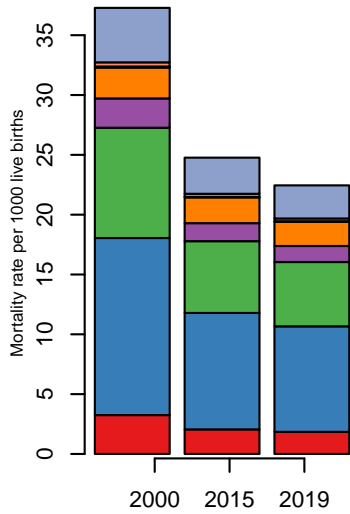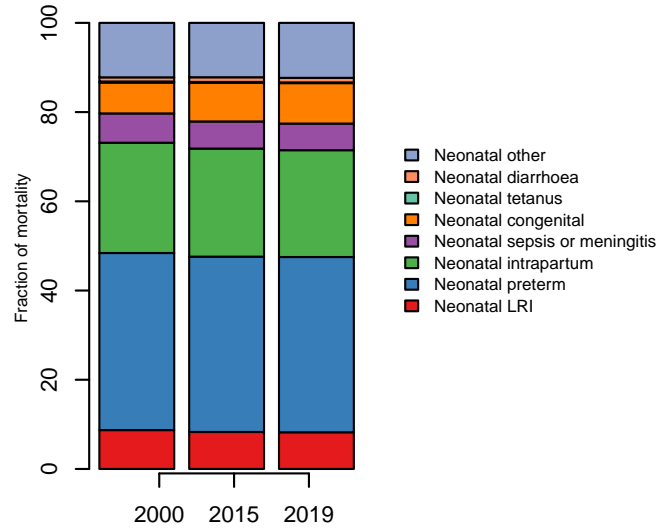

● 2000 – 2015      ● 2015 – 2019 (not on target)      → Deficit to target      ○ 2015 – 2019 (on target)



### Mongolia (Under five)

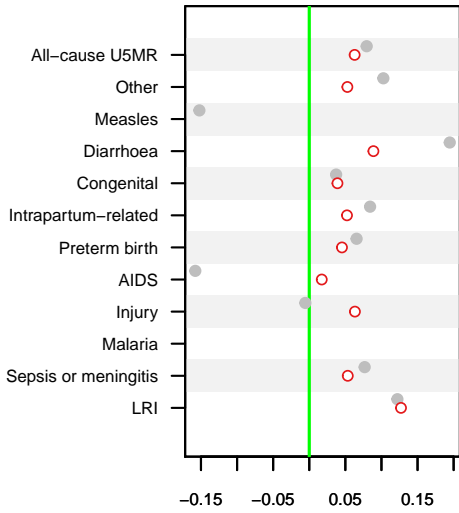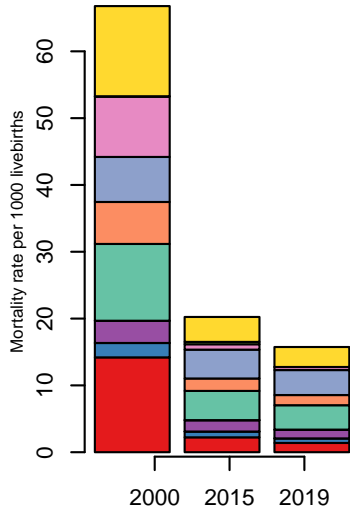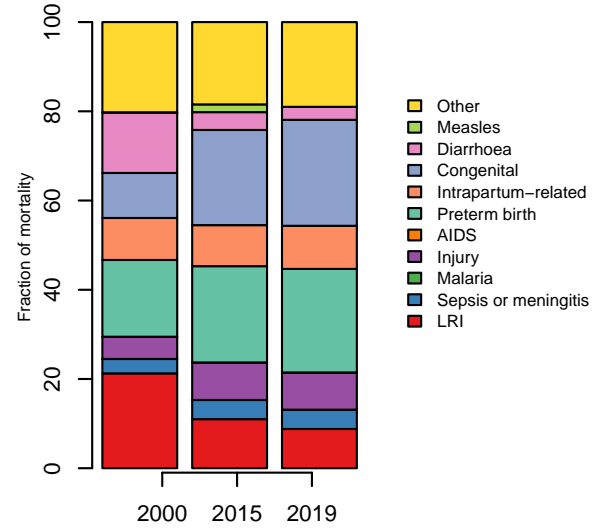

### Mongolia (Neonatal)

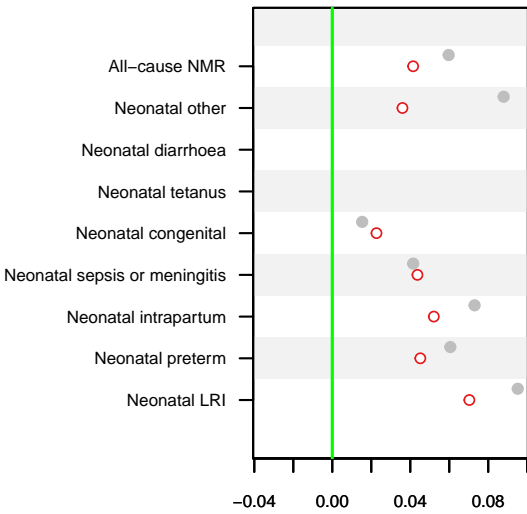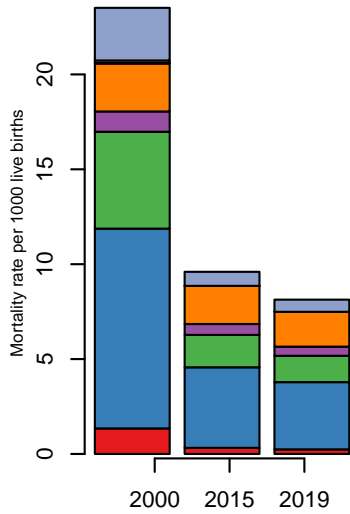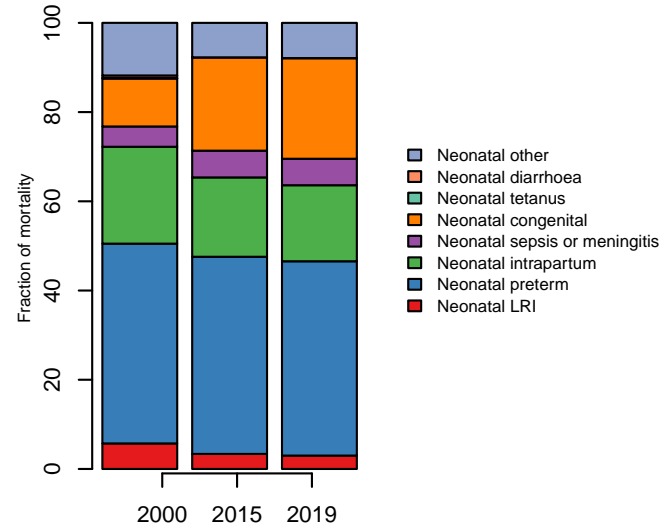

● 2000 – 2015      ● 2015 – 2019 (not on target)      → Deficit to target      ○ 2015 – 2019 (on target)

### Mozambique (Under five)

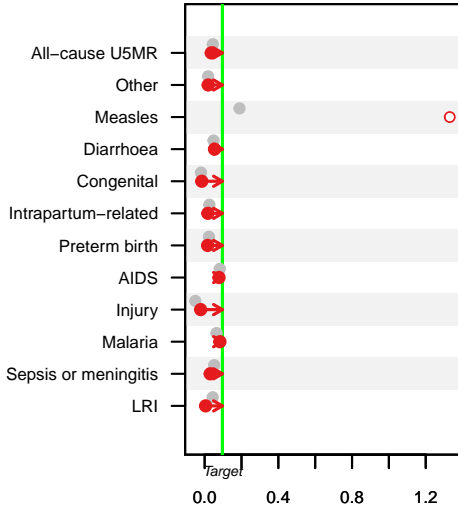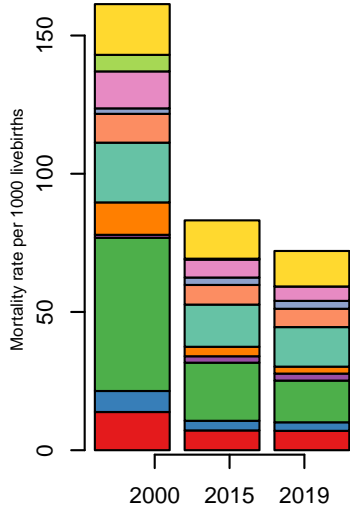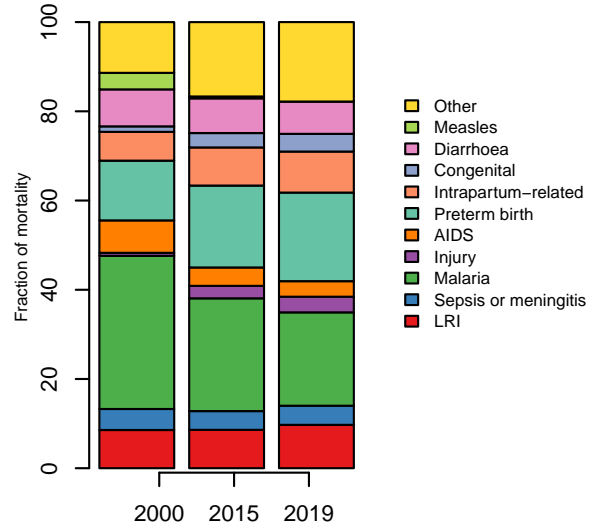

### Mozambique (Neonatal)

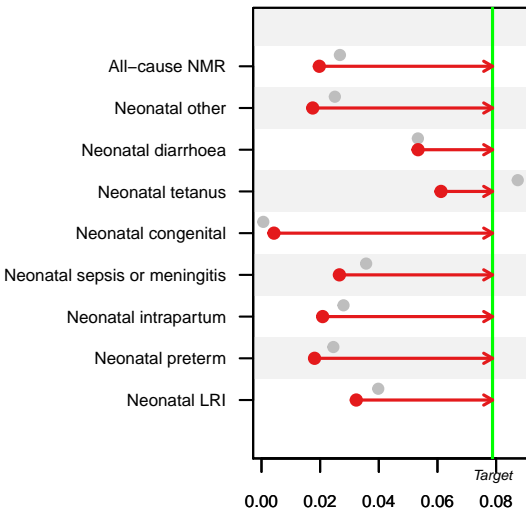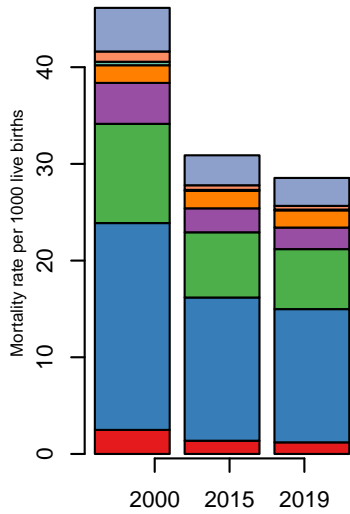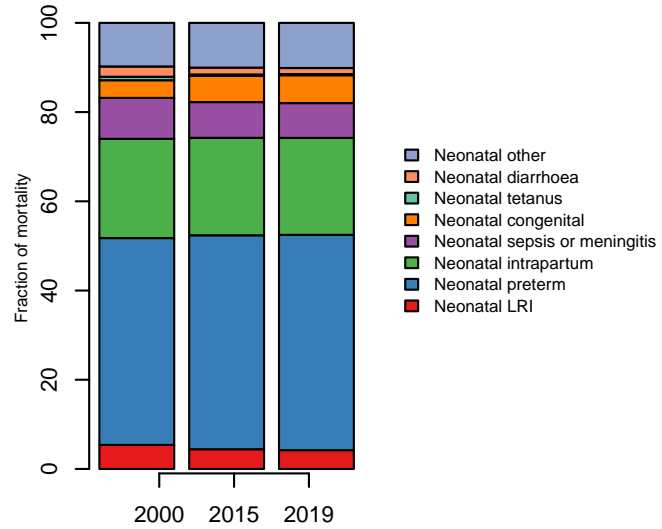

● 2000 – 2015      ● 2015 – 2019 (not on target)      → Deficit to target      ○ 2015 – 2019 (on target)

### Mauritania (Under five)

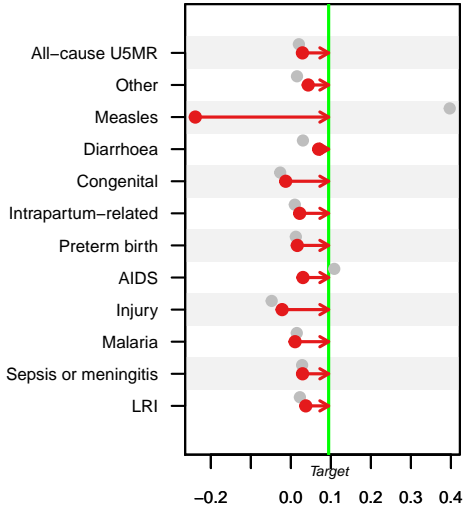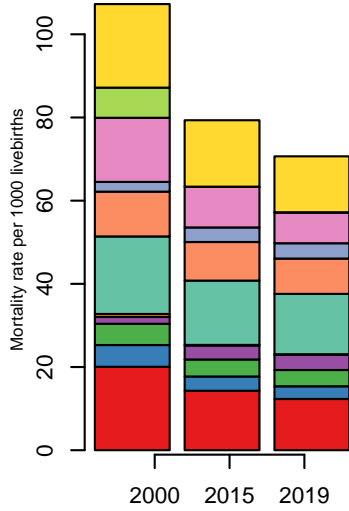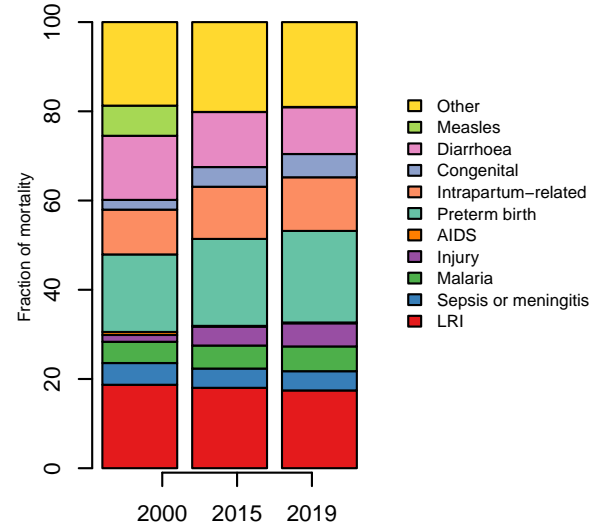

### Mauritania (Neonatal)

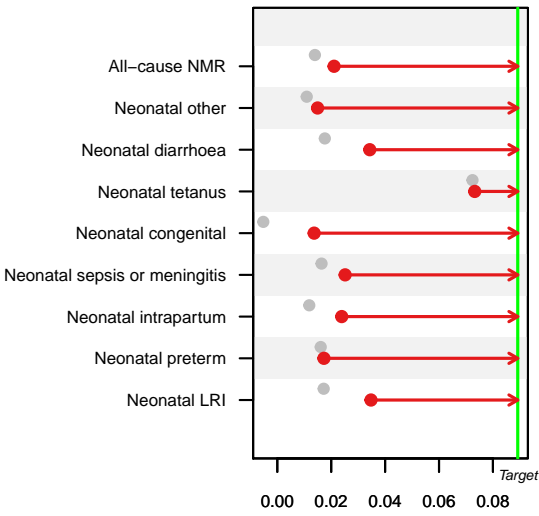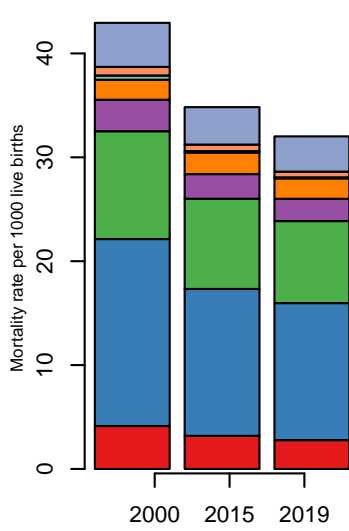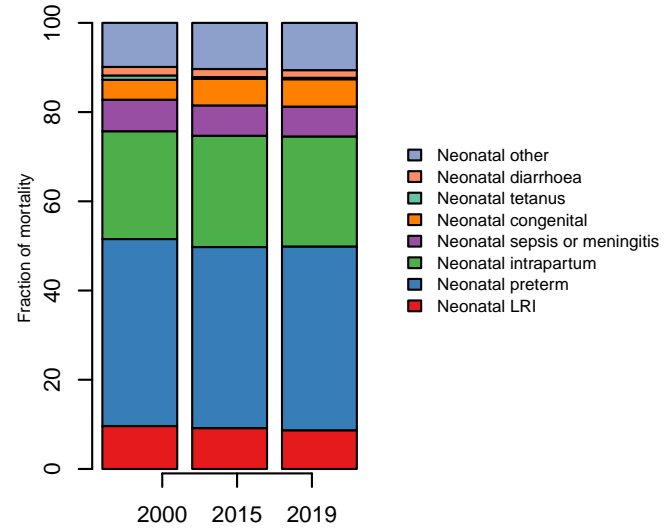

● 2000 – 2015      ● 2015 – 2019 (not on target)      → Deficit to target      ○ 2015 – 2019 (on target)

### Mauritius (Under five)

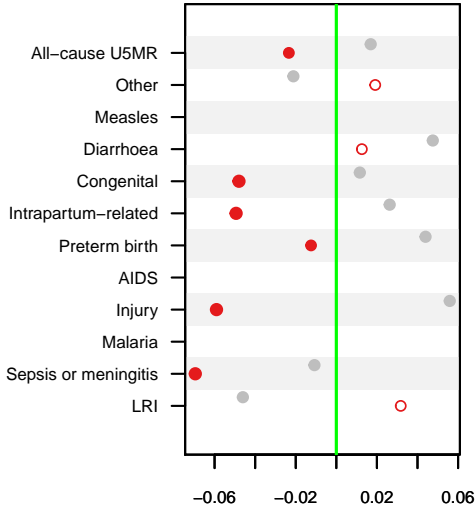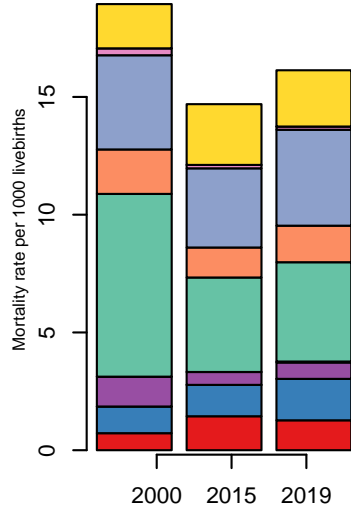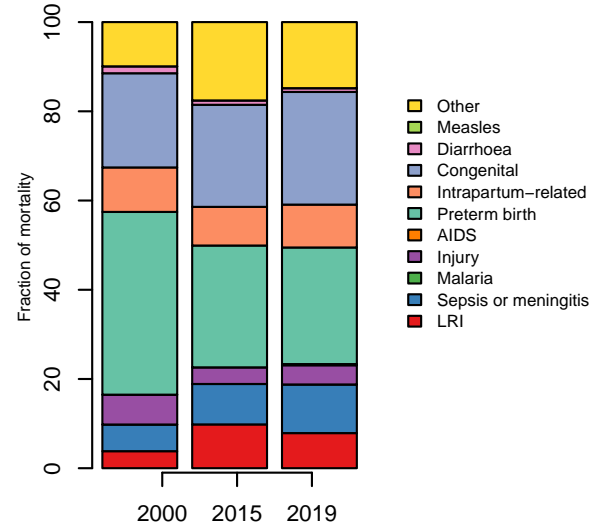

### Mauritius (Neonatal)

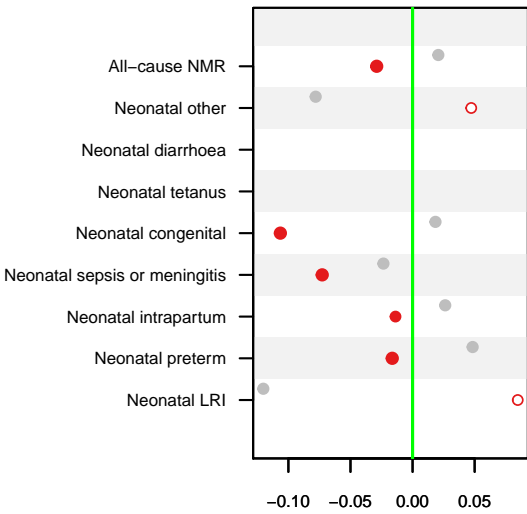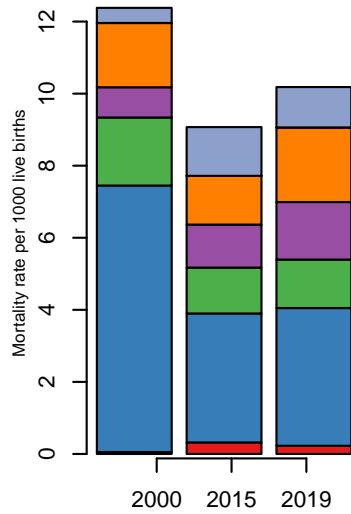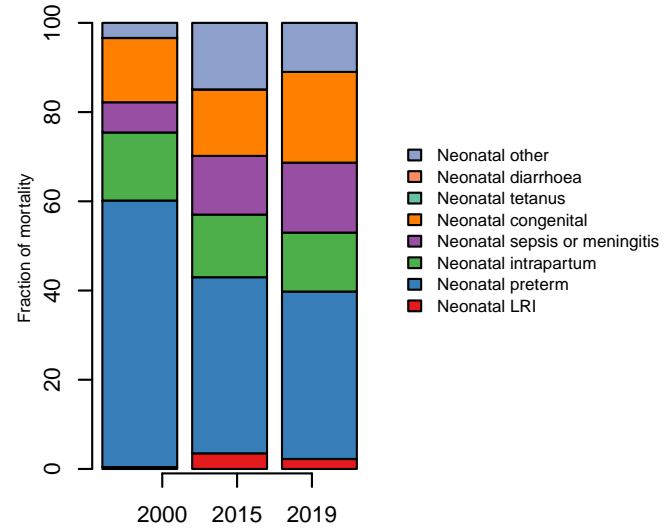

● 2000 - 2015      ● 2015 - 2019 (not on target)      → Deficit to target      ○ 2015 - 2019 (on target)

### Malawi (Under five)

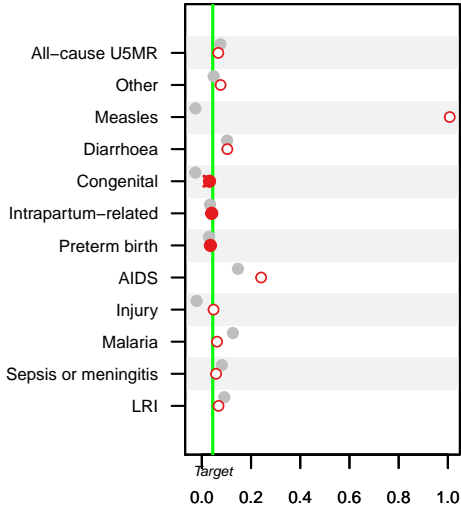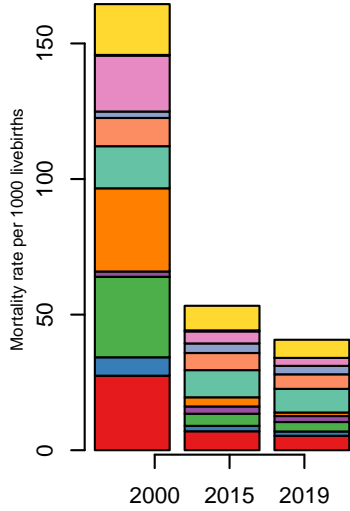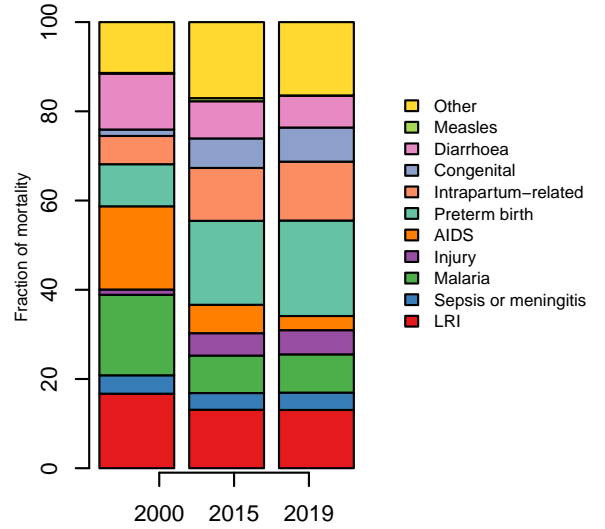

### Malawi (Neonatal)

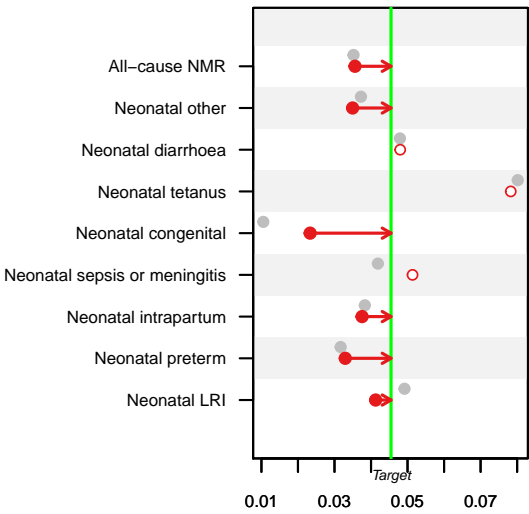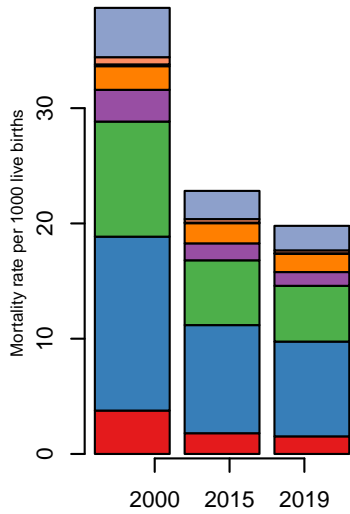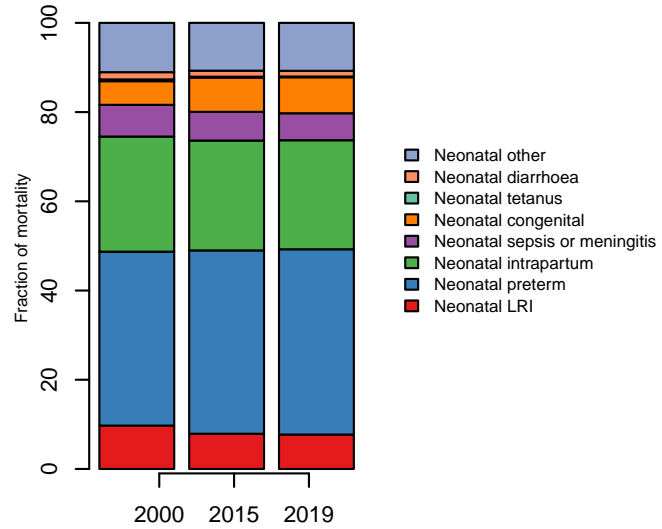

● 2000 – 2015      ● 2015 – 2019 (not on target)      → Deficit to target      ○ 2015 – 2019 (on target)

### Malaysia (Under five)

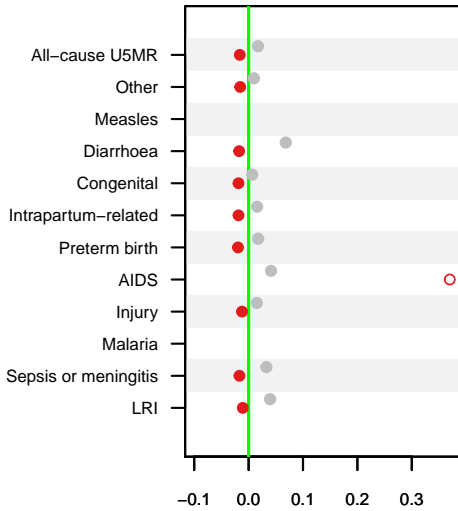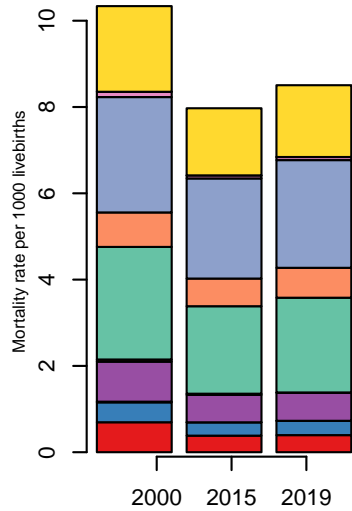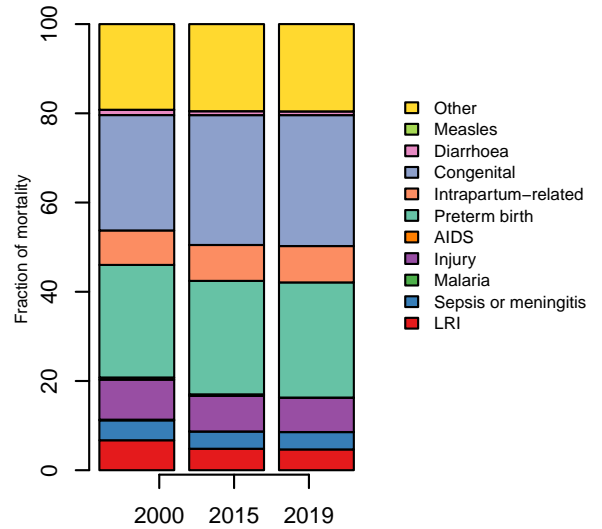

### Malaysia (Neonatal)

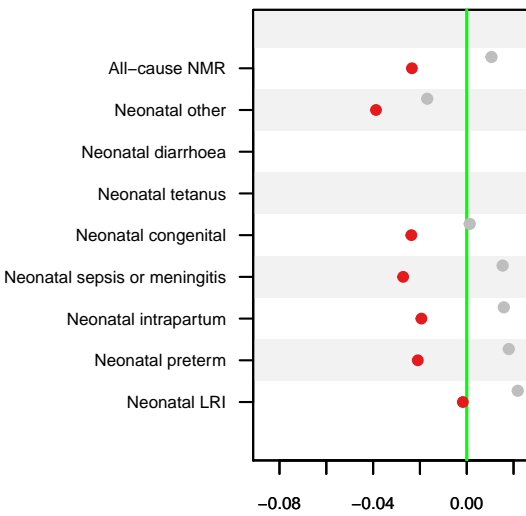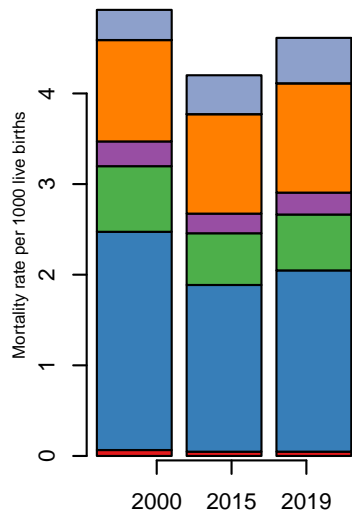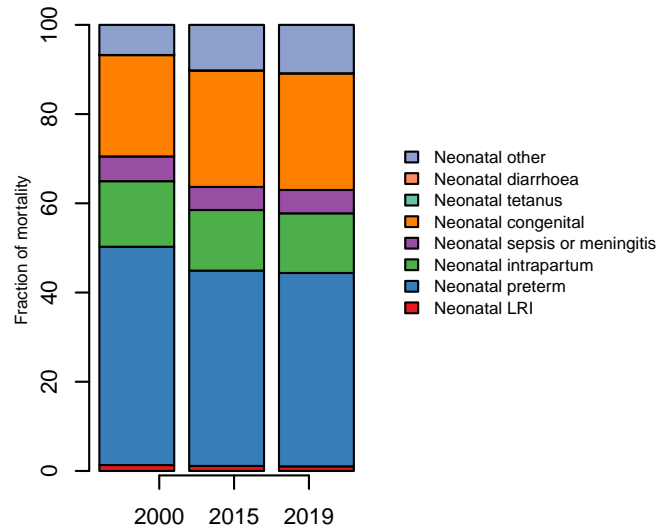

● 2000 - 2015      ● 2015 - 2019 (not on target)      → Deficit to target      ○ 2015 - 2019 (on target)

### Namibia (Under five)

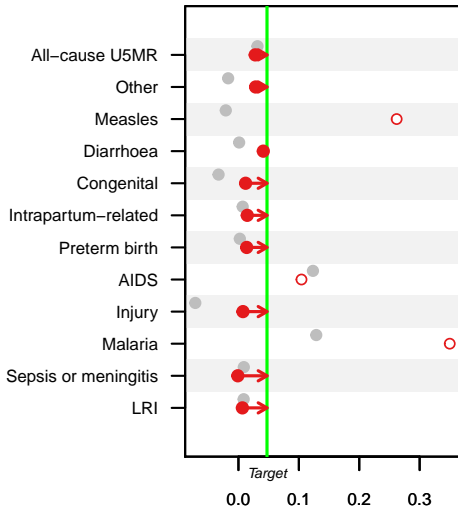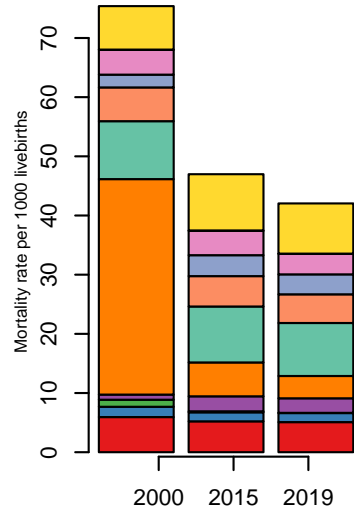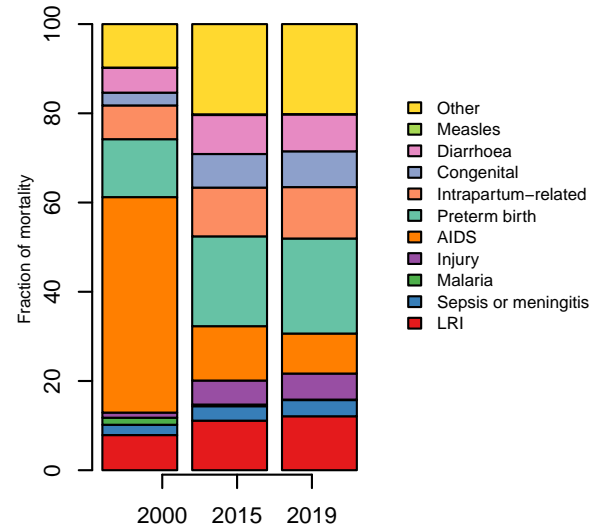

### Namibia (Neonatal)

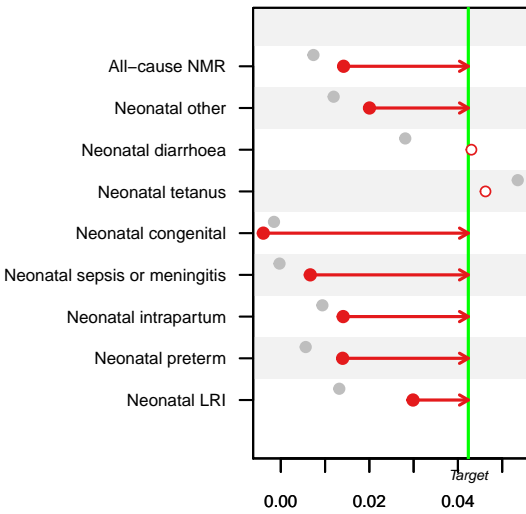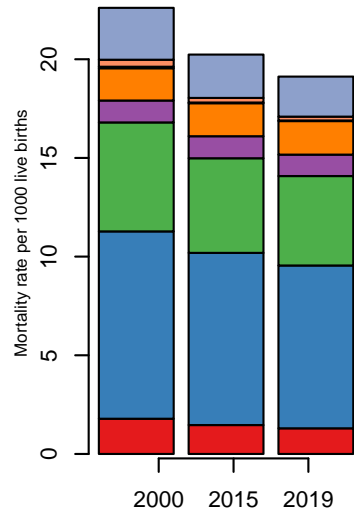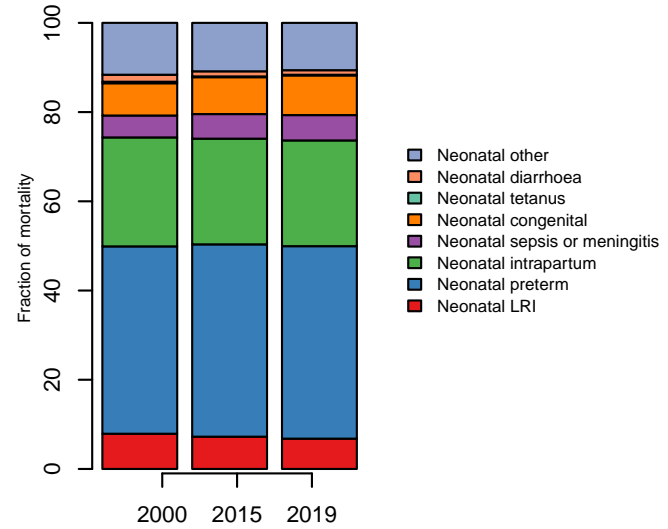

● 2000 – 2015      ● 2015 – 2019 (not on target)      → Deficit to target      ○ 2015 – 2019 (on target)

### Niger (Under five)

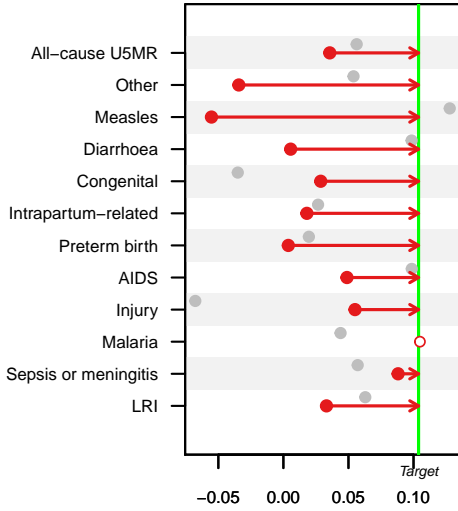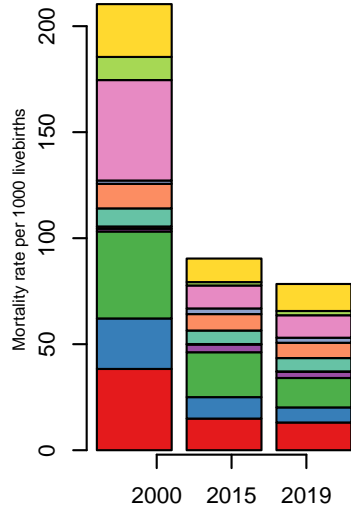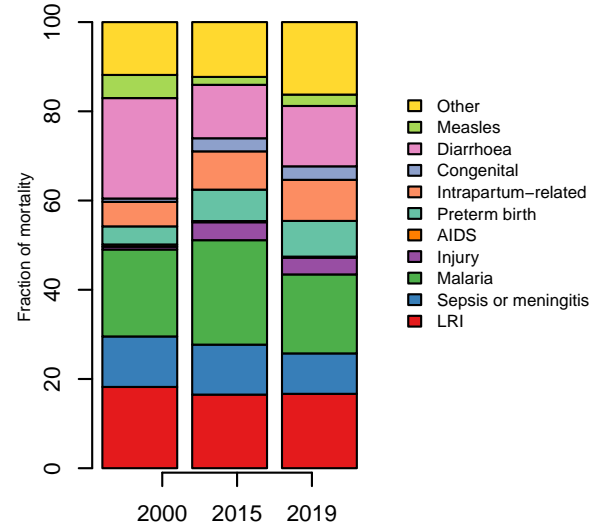

- Other
- Measles
- Diarrhoea
- Congenital
- Intrapartum-related
- AIDS
- Injury
- Malaria
- Sepsis or meningitis
- LRI

### Niger (Neonatal)

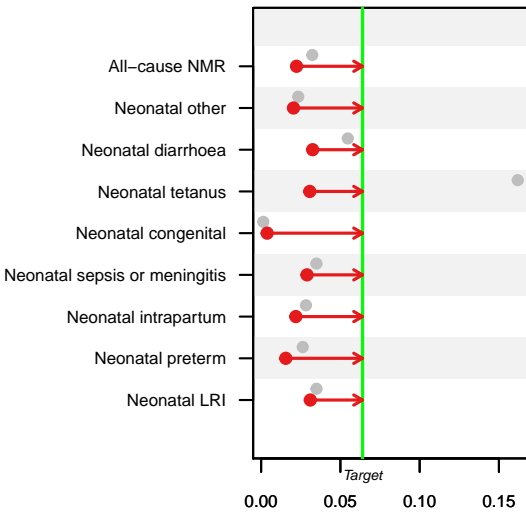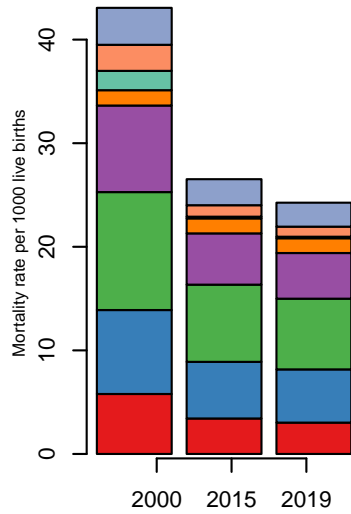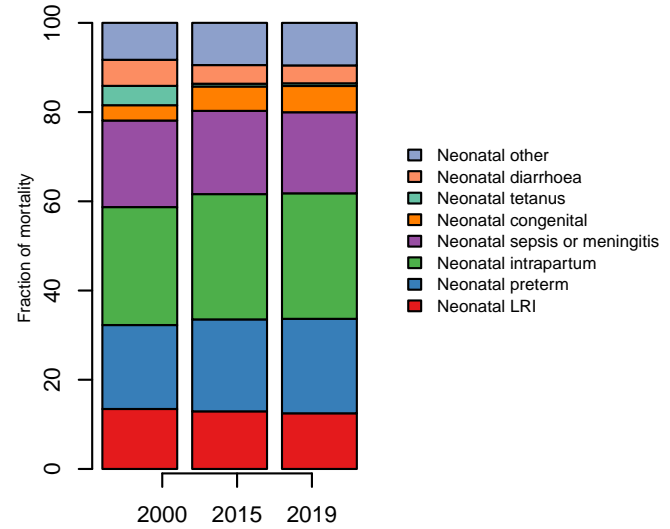

- Neonatal other
- Neonatal diarrhoea
- Neonatal tetanus
- Neonatal congenital
- Neonatal sepsis or meningitis
- Neonatal intrapartum
- Neonatal preterm
- Neonatal LRI

● 2000 – 2015      ● 2015 – 2019 (not on target)      → Deficit to target      ○ 2015 – 2019 (on target)



### Nigeria (Under five)

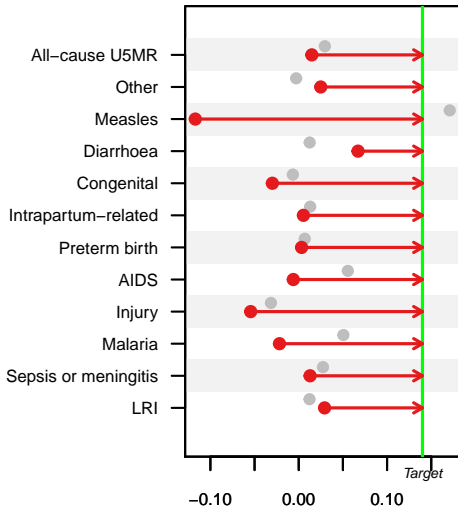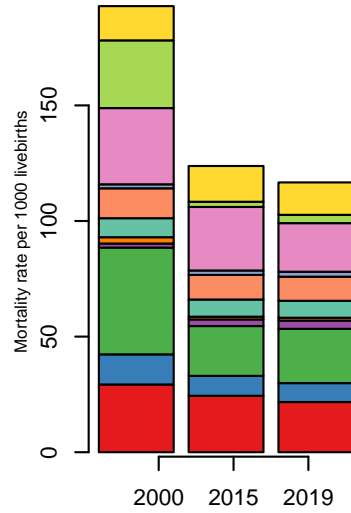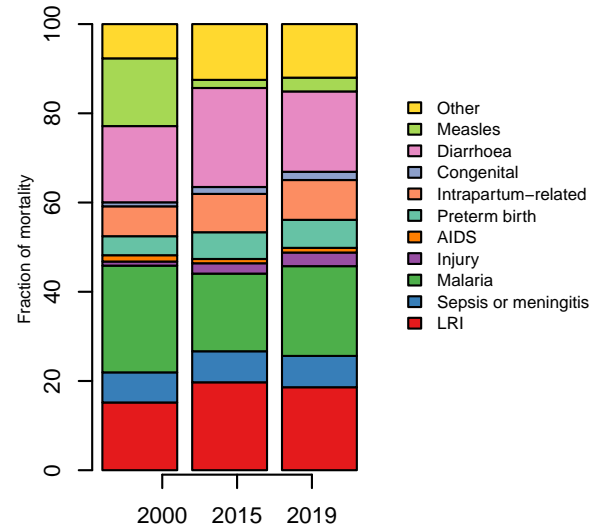

### Nigeria (Neonatal)

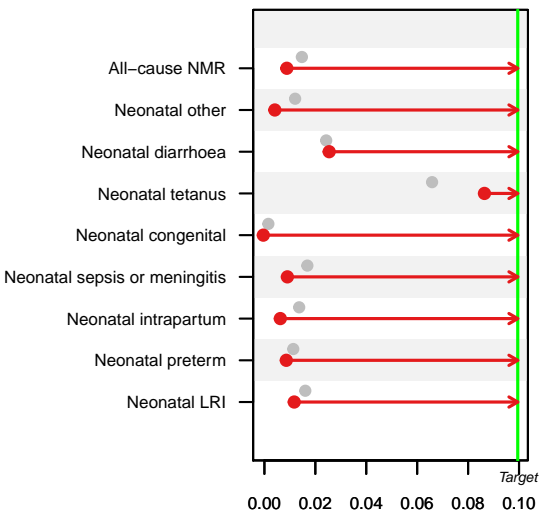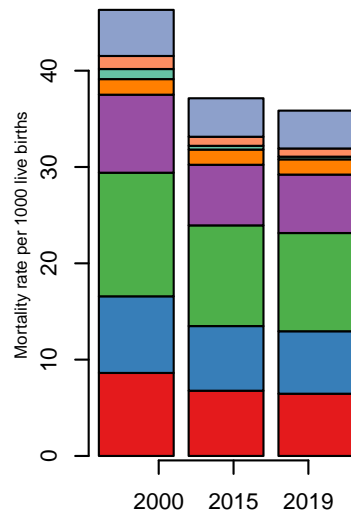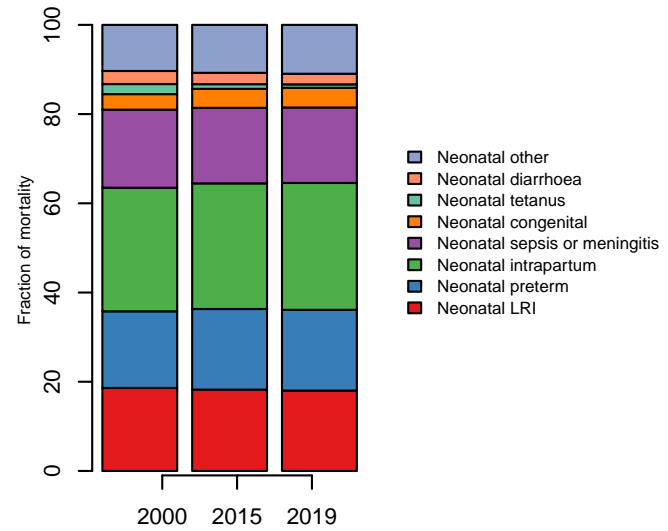

● 2000 – 2015      ● 2015 – 2019 (not on target)      → Deficit to target      ○ 2015 – 2019 (on target)

### Nicaragua (Under five)

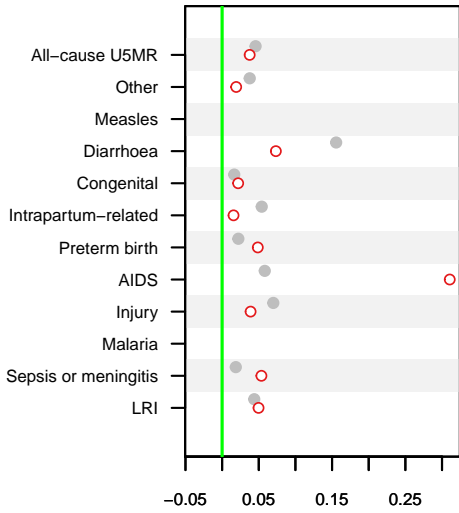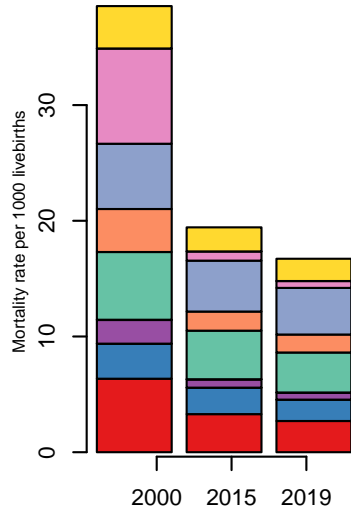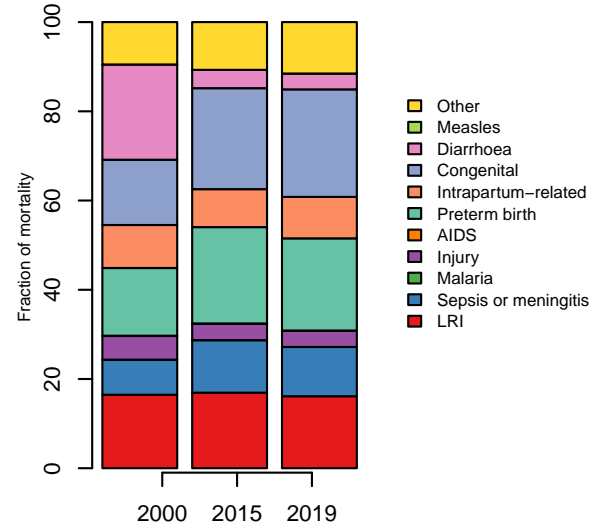

### Nicaragua (Neonatal)

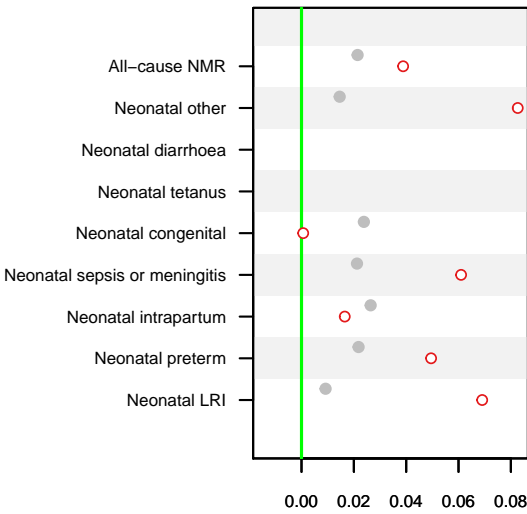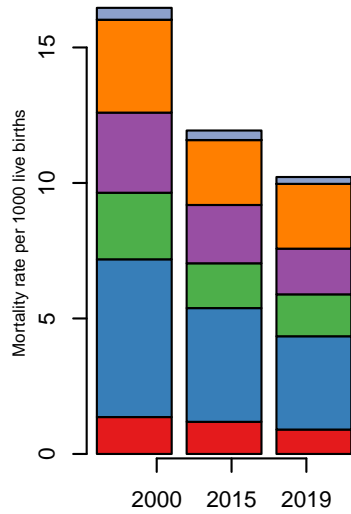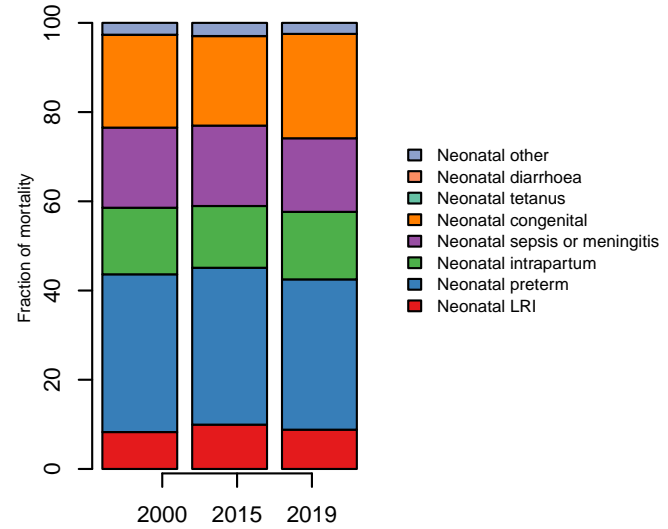

● 2000 – 2015      ● 2015 – 2019 (not on target)      → Deficit to target      ○ 2015 – 2019 (on target)

### Netherlands (Under five)

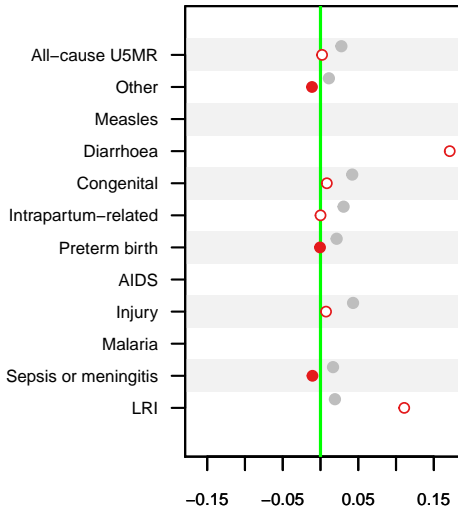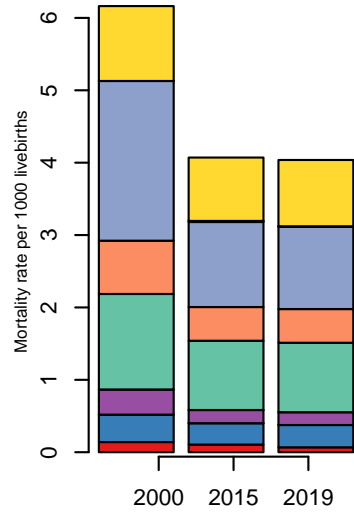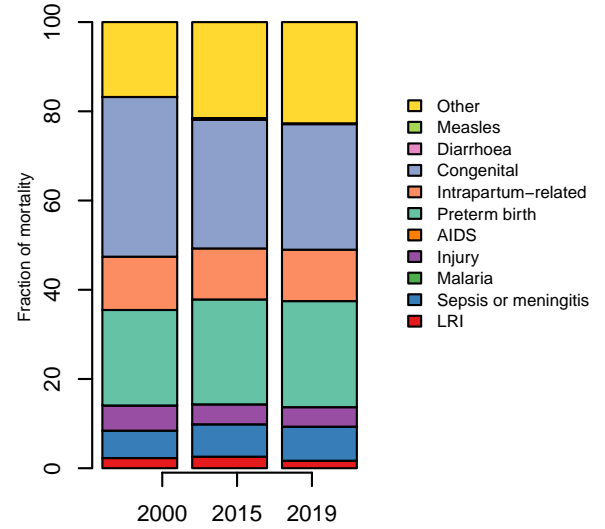

### Netherlands (Neonatal)

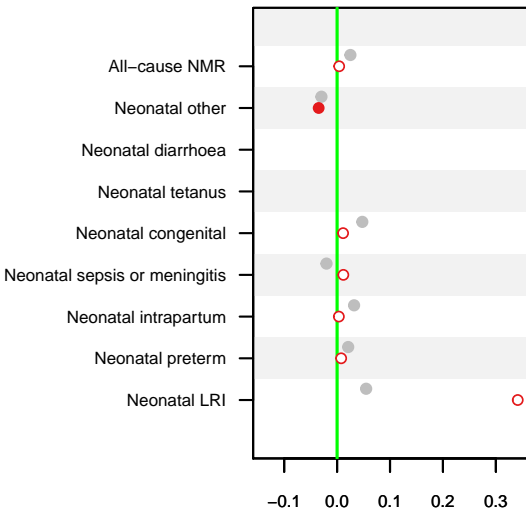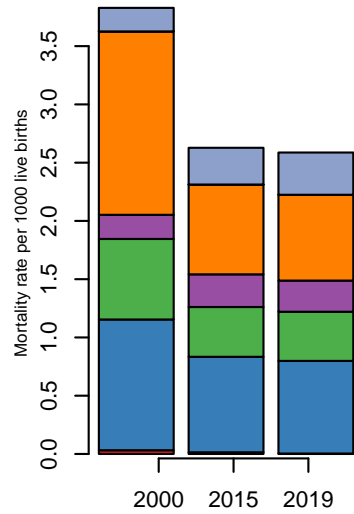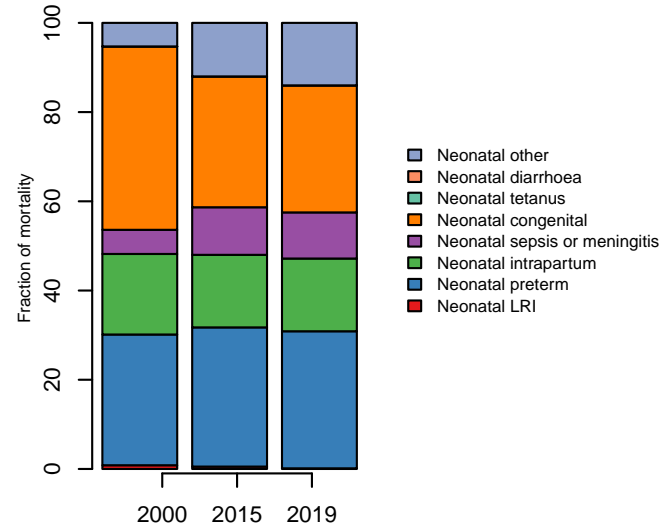

● 2000 – 2015      ● 2015 – 2019 (not on target)      → Deficit to target      ○ 2015 – 2019 (on target)

### Norway (Under five)

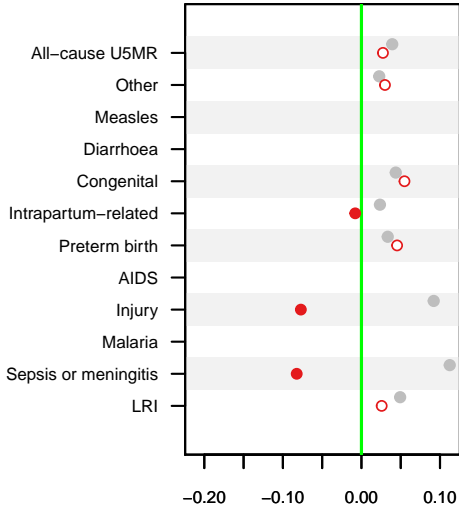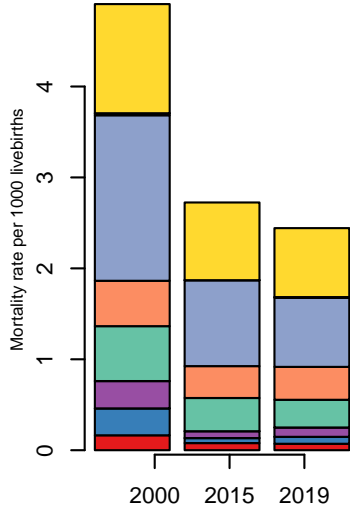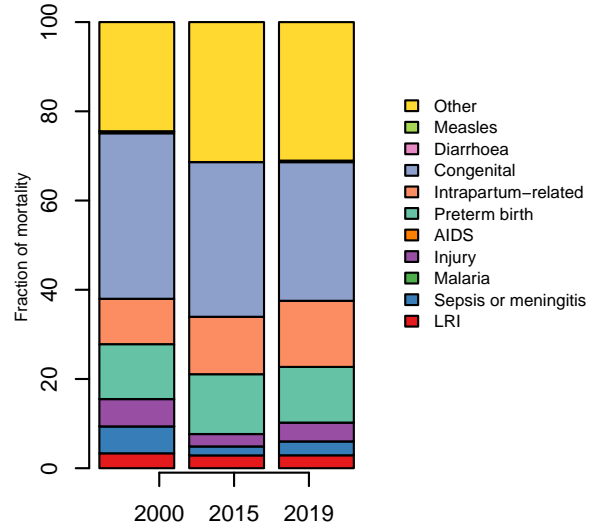

### Norway (Neonatal)

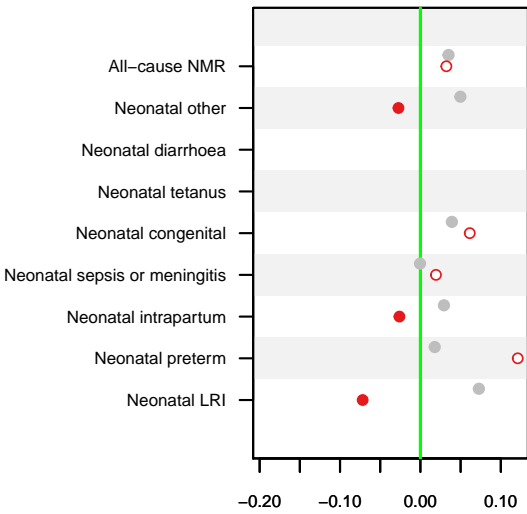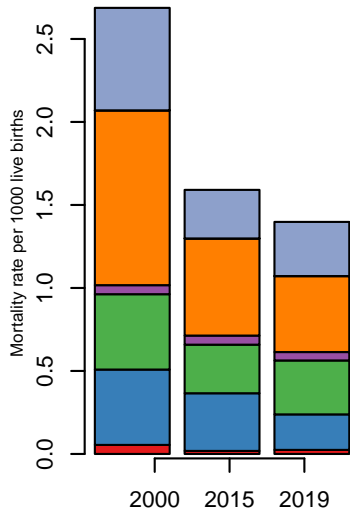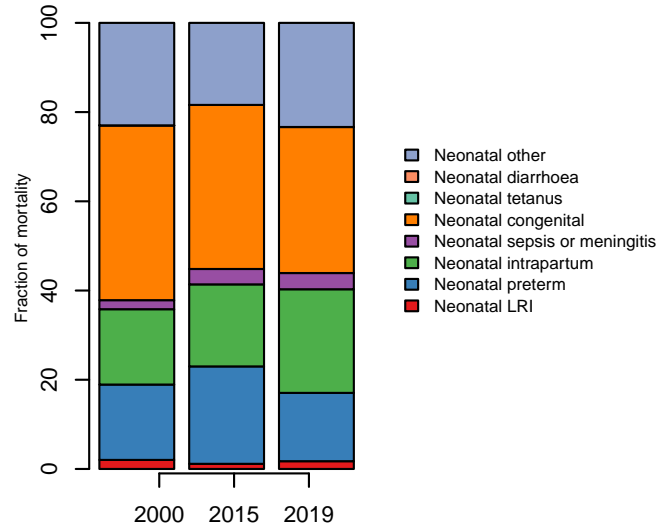

● 2000 – 2015      ● 2015 – 2019 (not on target)      → Deficit to target      ○ 2015 – 2019 (on target)

### Nepal (Under five)

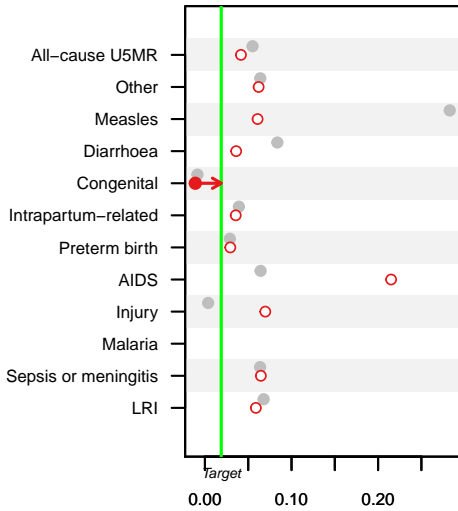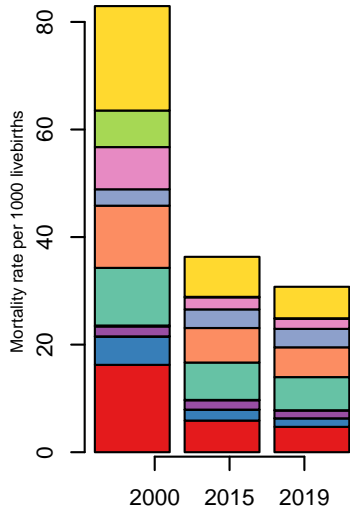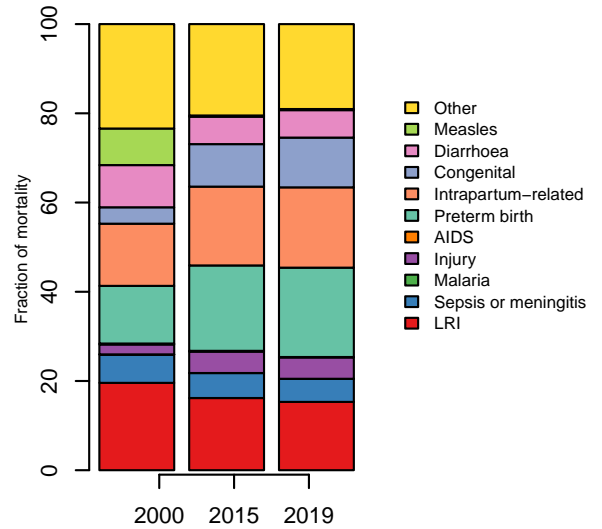

### Nepal (Neonatal)

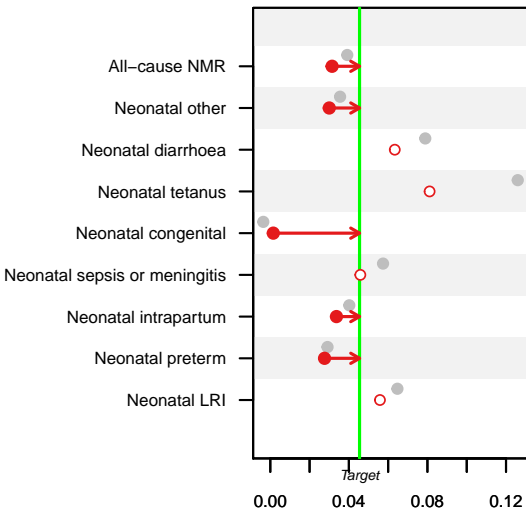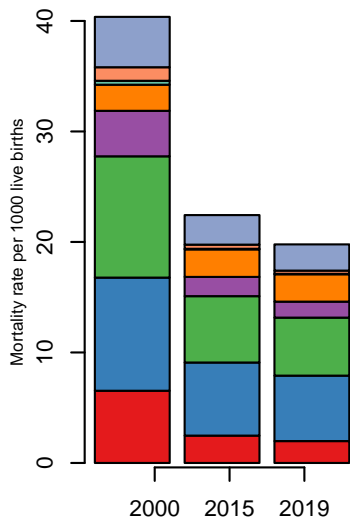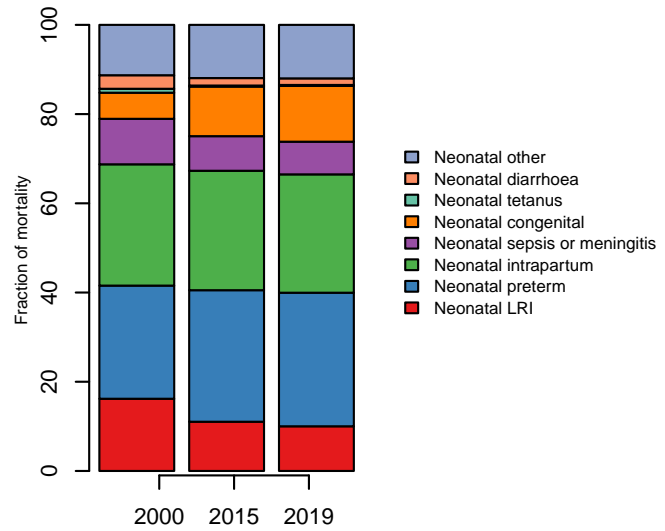

● 2000 – 2015      ● 2015 – 2019 (not on target)      → Deficit to target      ○ 2015 – 2019 (on target)

### New Zealand (Under five)

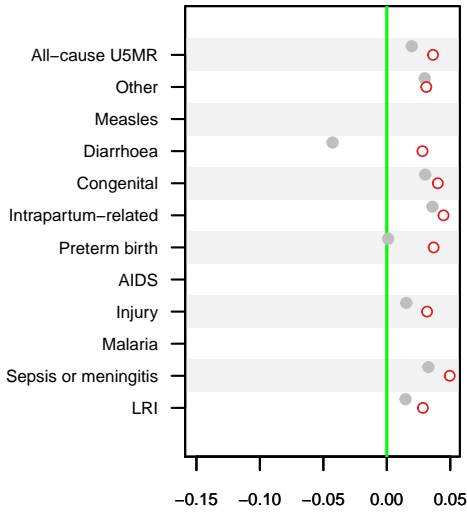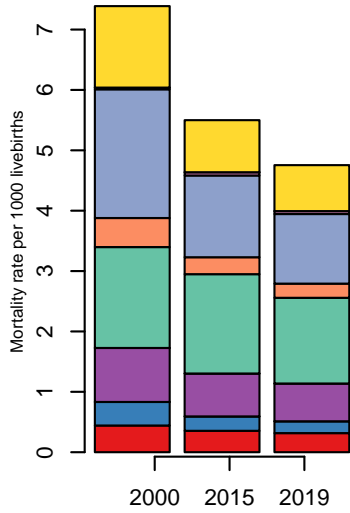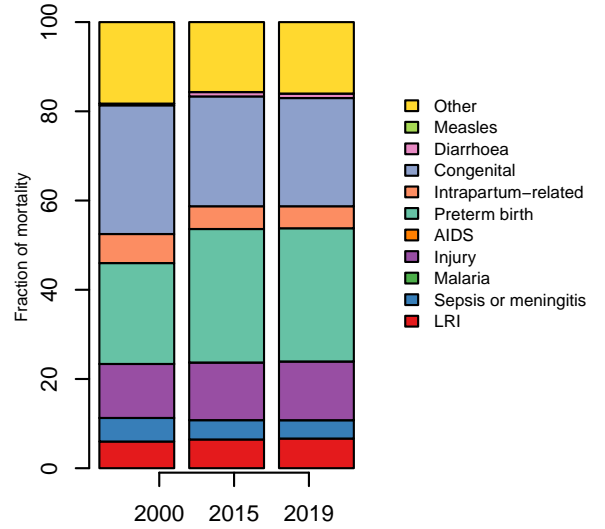

### New Zealand (Neonatal)

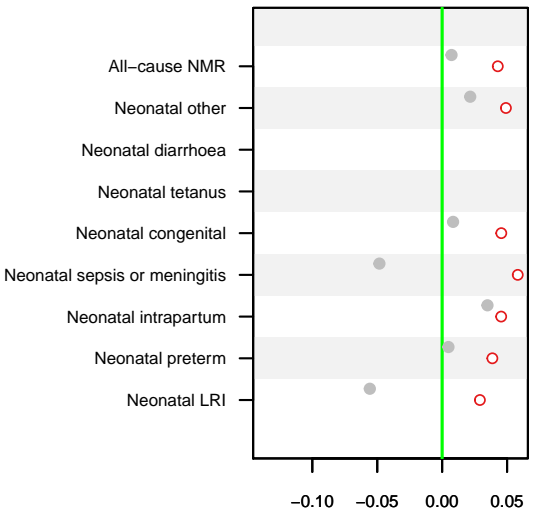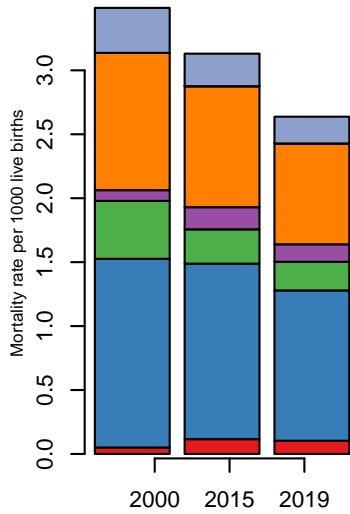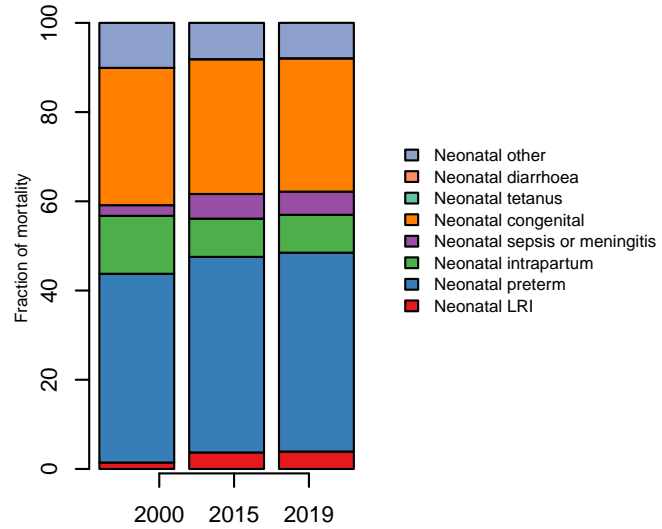

● 2000 – 2015      ● 2015 – 2019 (not on target)      → Deficit to target      ○ 2015 – 2019 (on target)

### Oman (Under five)

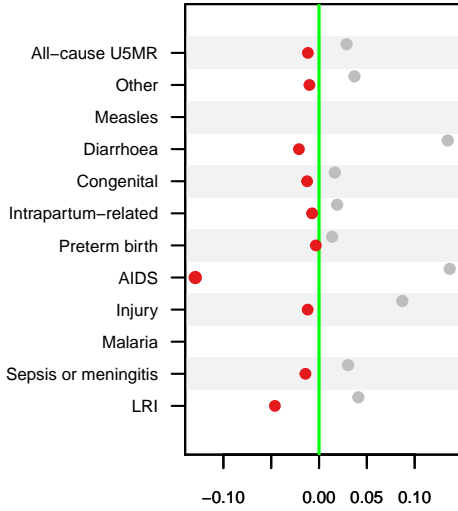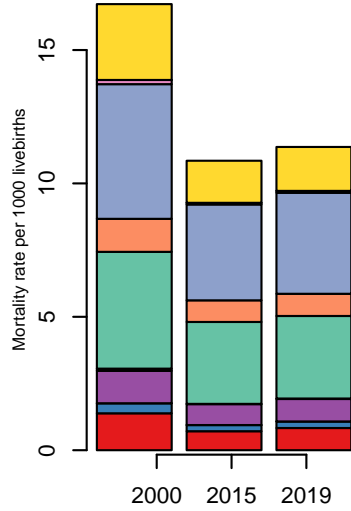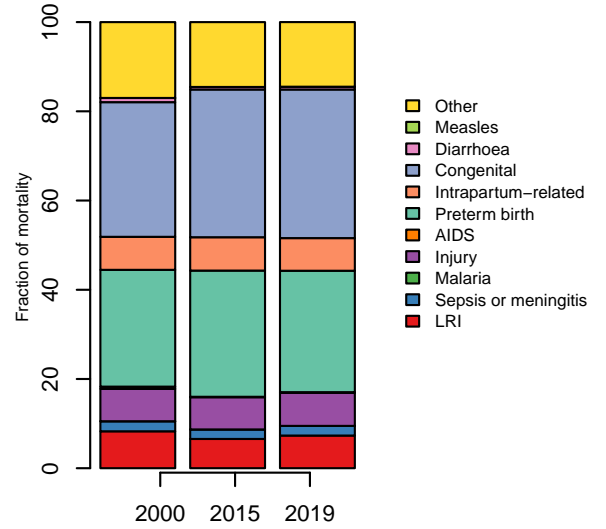

### Oman (Neonatal)

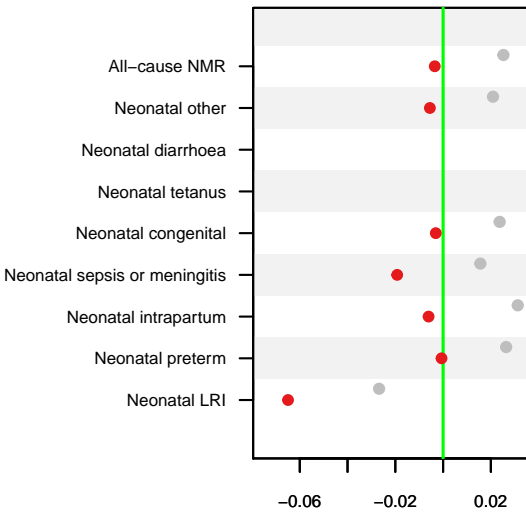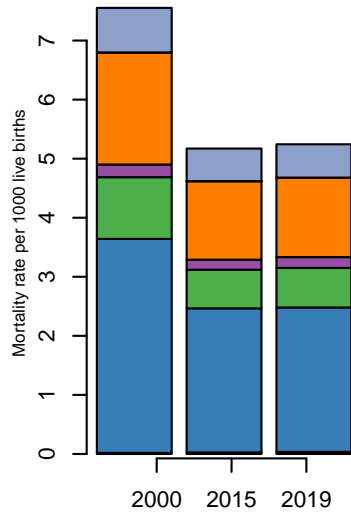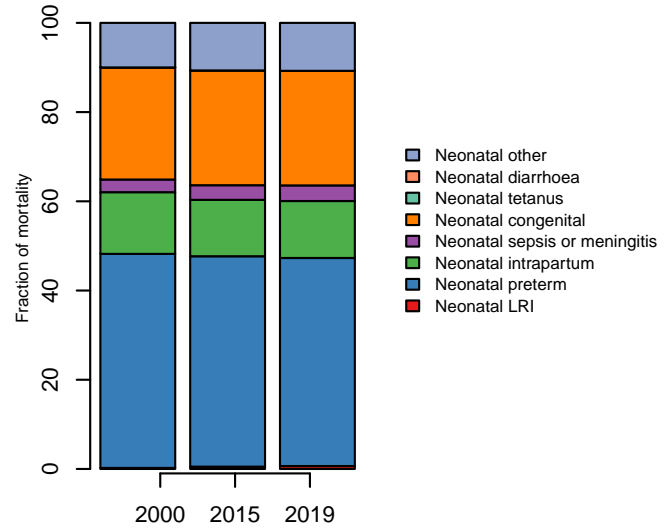

● 2000 – 2015      ● 2015 – 2019 (not on target)      → Deficit to target      ○ 2015 – 2019 (on target)

### Pakistan (Under five)

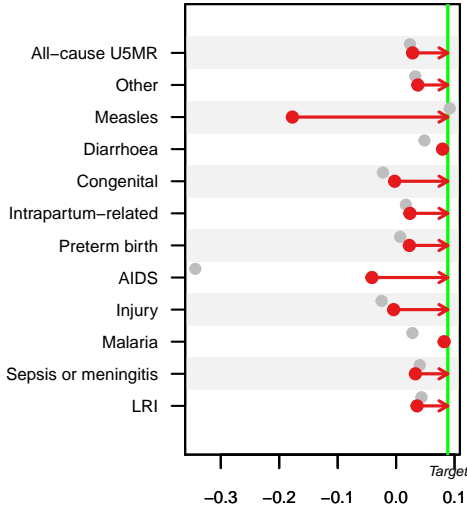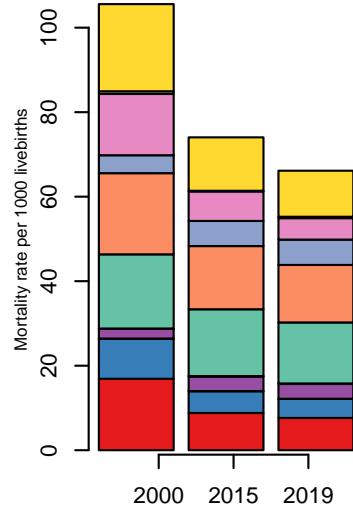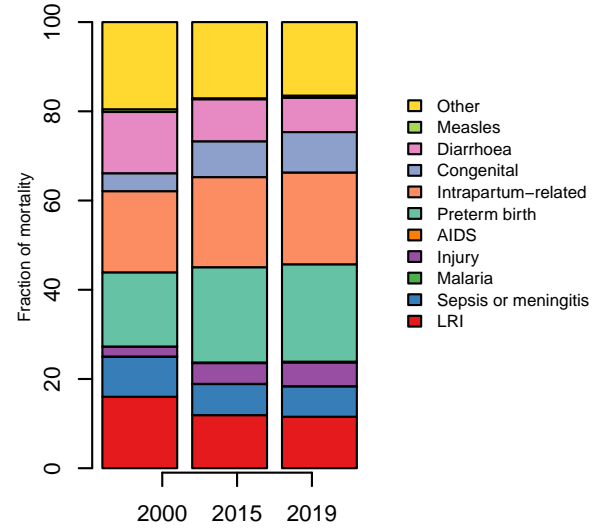

### Pakistan (Neonatal)

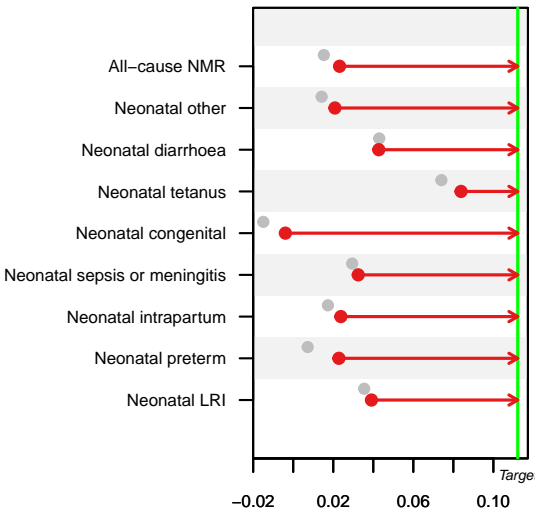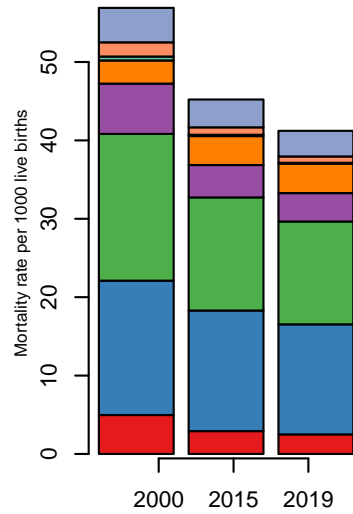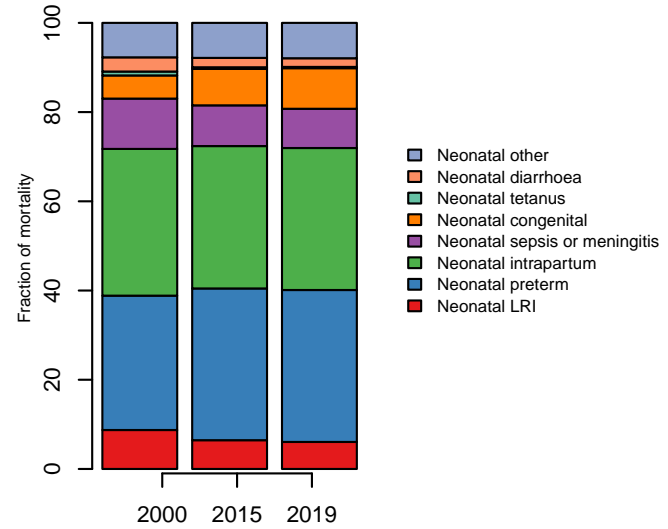

● 2000 – 2015      ● 2015 – 2019 (not on target)      → Deficit to target      ○ 2015 – 2019 (on target)



### Panama (Under five)

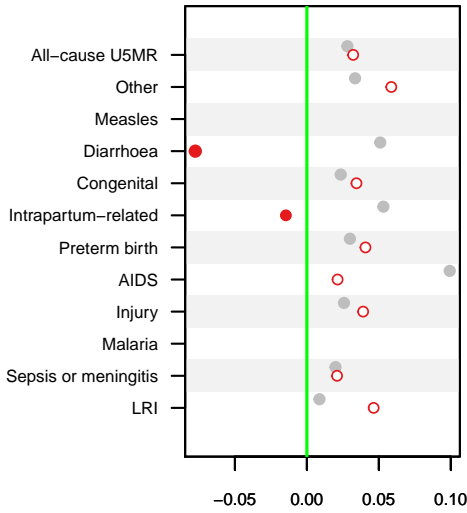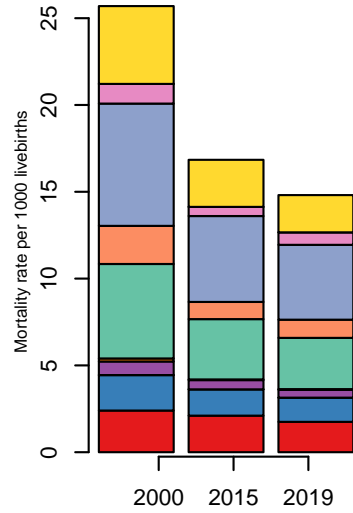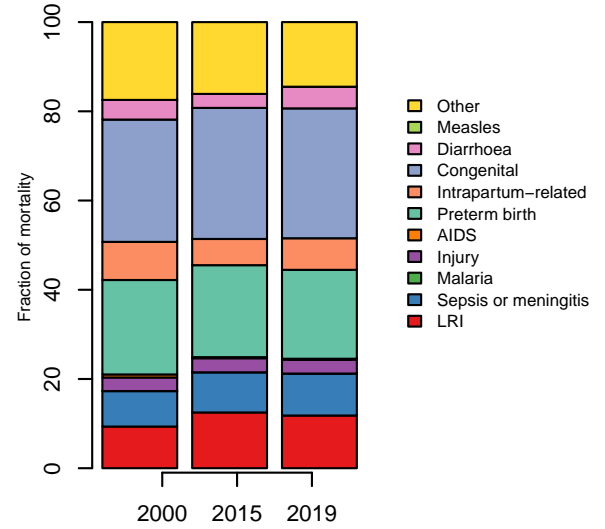

### Panama (Neonatal)

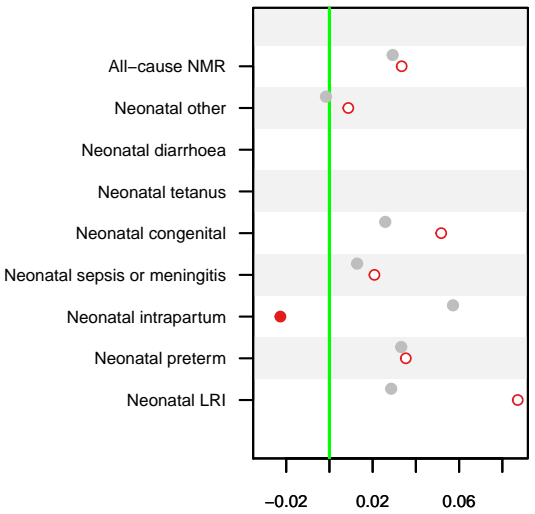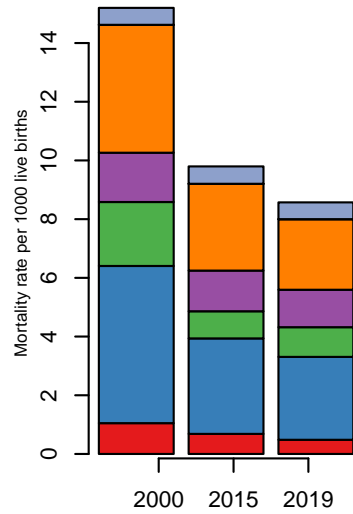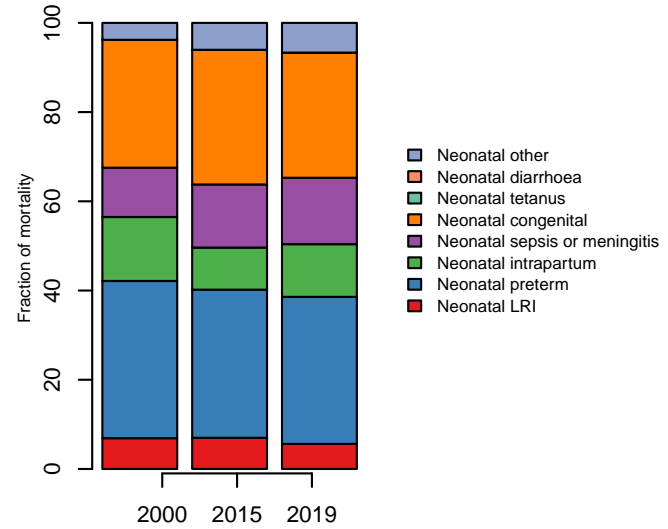

● 2000 – 2015      ● 2015 – 2019 (not on target)      → Deficit to target      ○ 2015 – 2019 (on target)

### Peru (Under five)

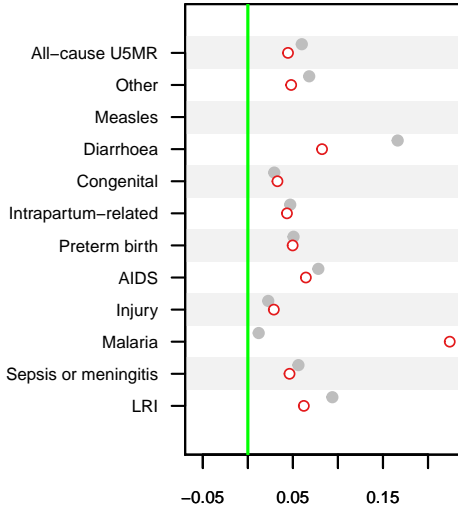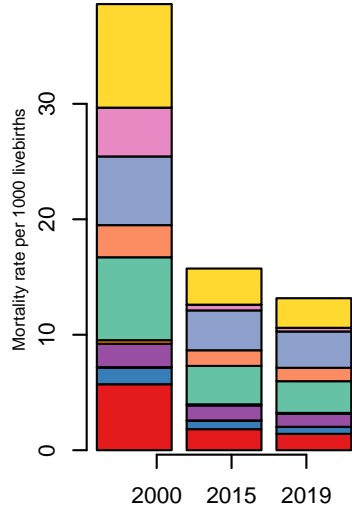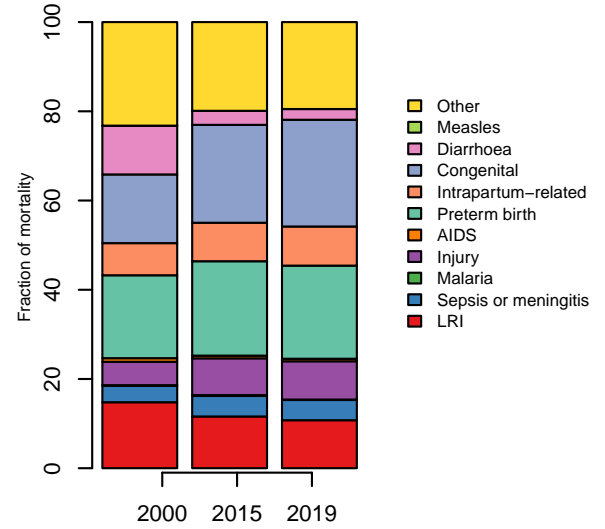

### Peru (Neonatal)

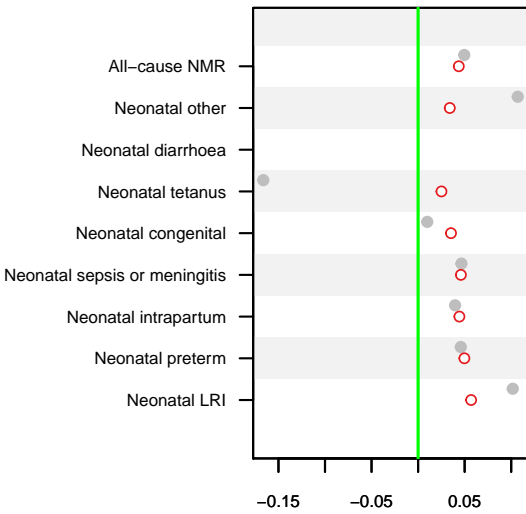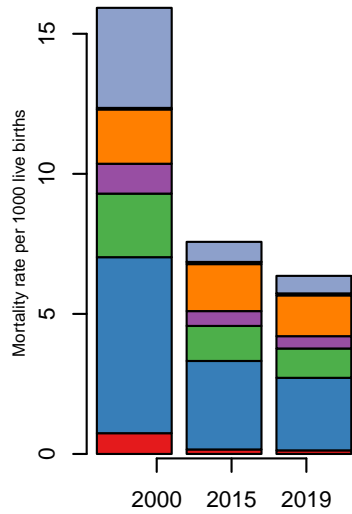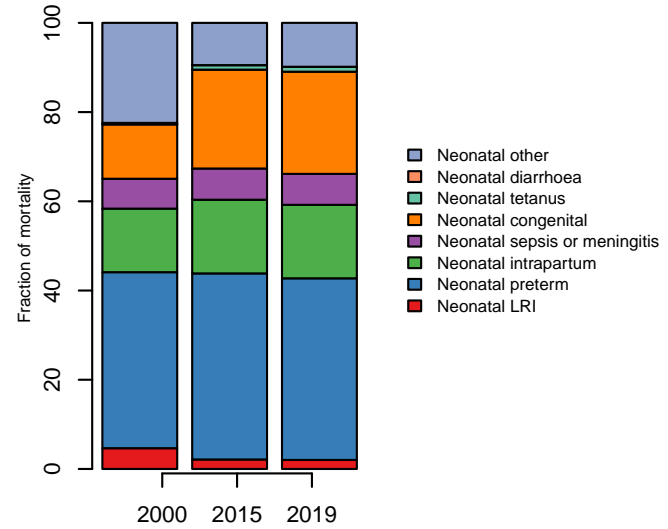

● 2000 – 2015      ● 2015 – 2019 (not on target)      → Deficit to target      ○ 2015 – 2019 (on target)

### Philippines (Under five)

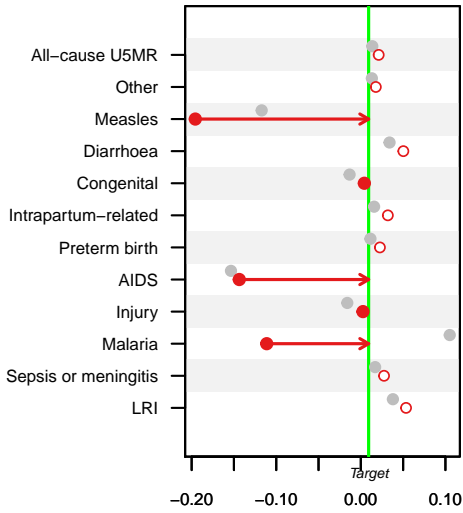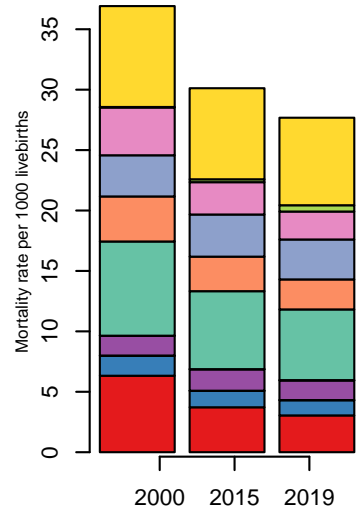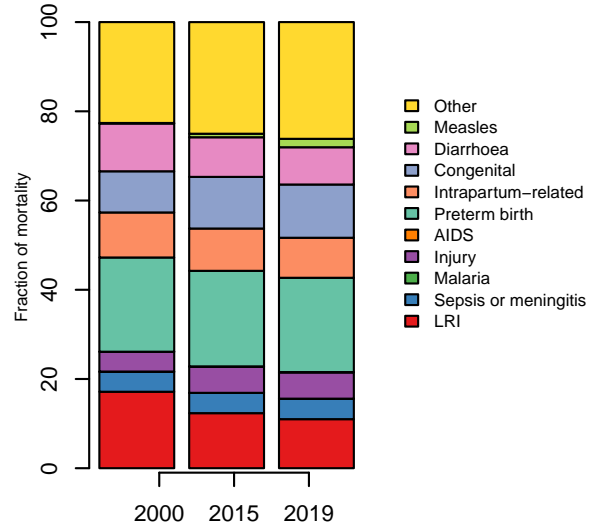

### Philippines (Neonatal)

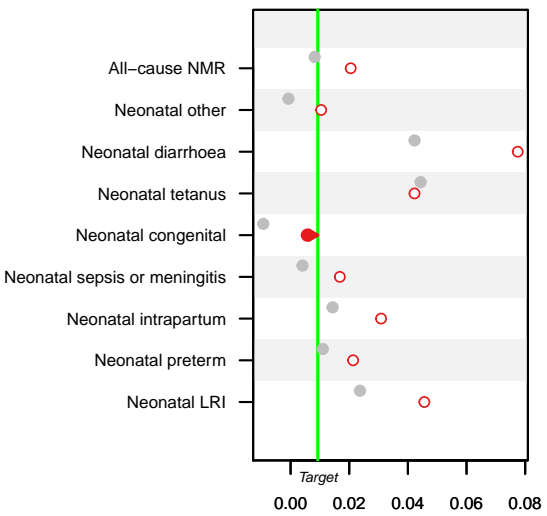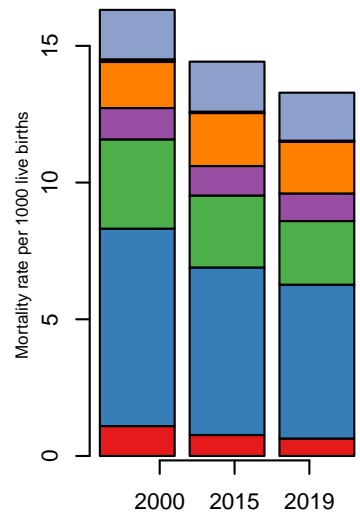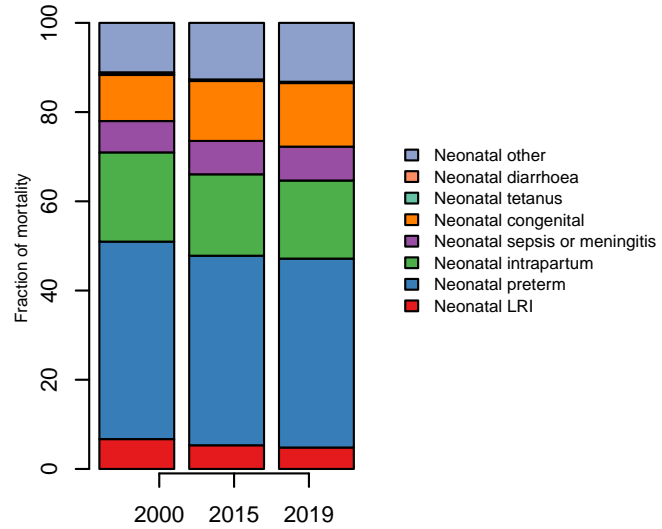

● 2000 – 2015      ● 2015 – 2019 (not on target)      → Deficit to target      ○ 2015 – 2019 (on target)

### Papua New Guinea (Under five)

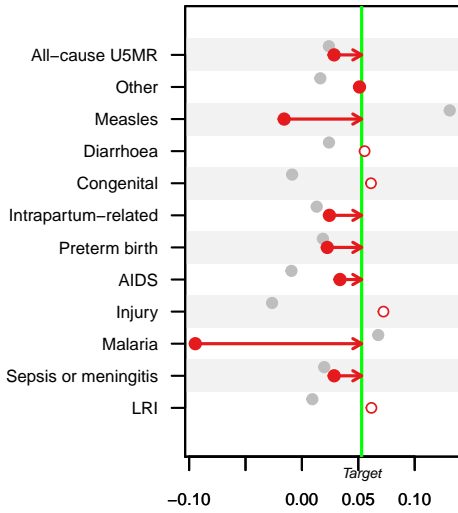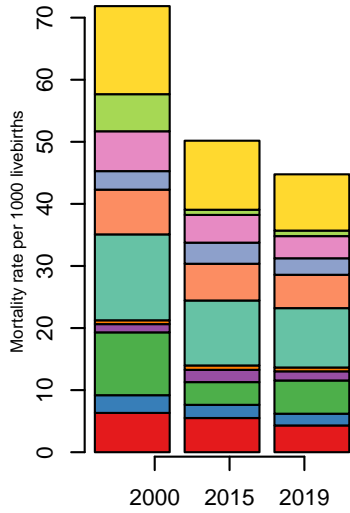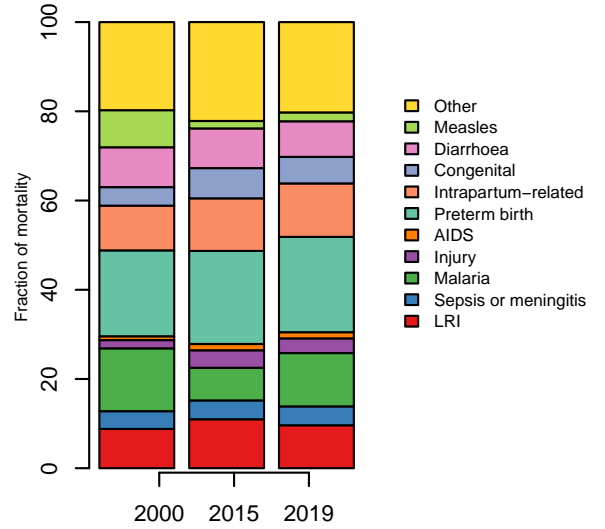

### Papua New Guinea (Neonatal)

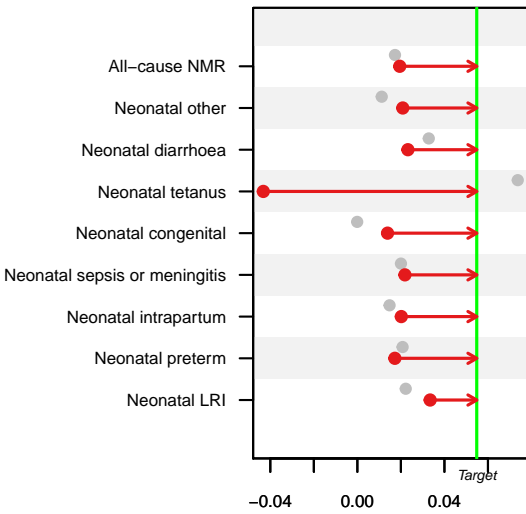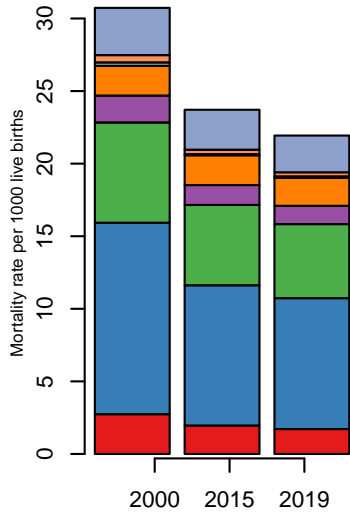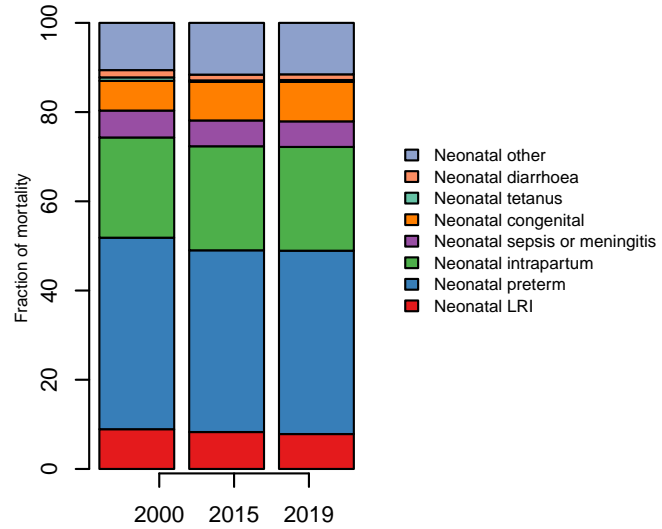

● 2000 – 2015      ● 2015 – 2019 (not on target)      → Deficit to target      ○ 2015 – 2019 (on target)

### Poland (Under five)

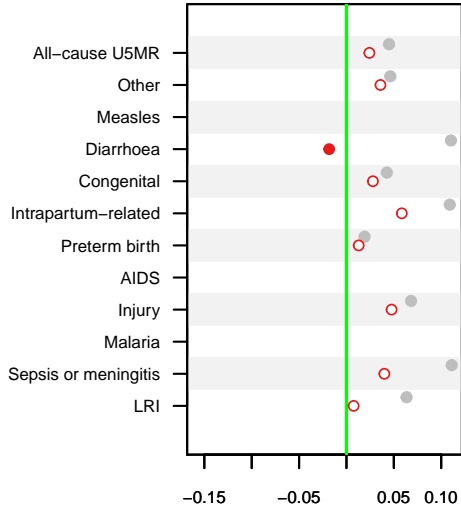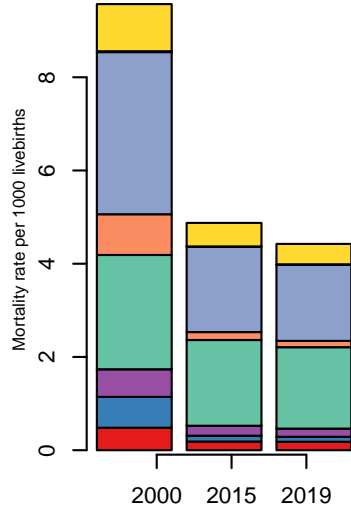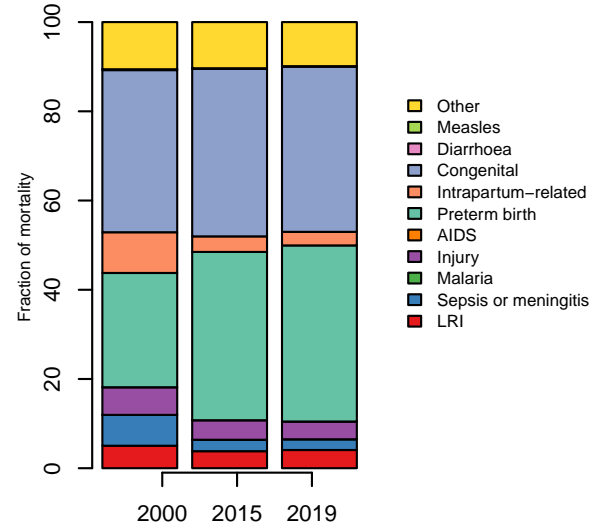

### Poland (Neonatal)

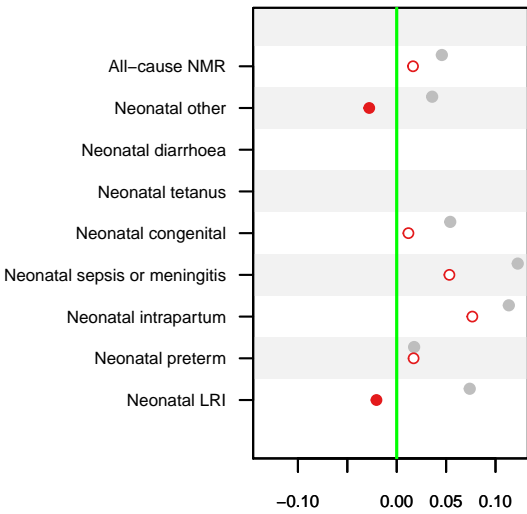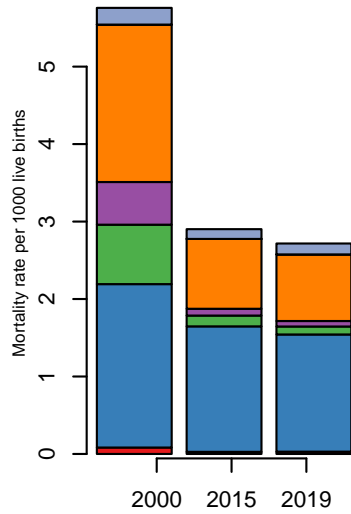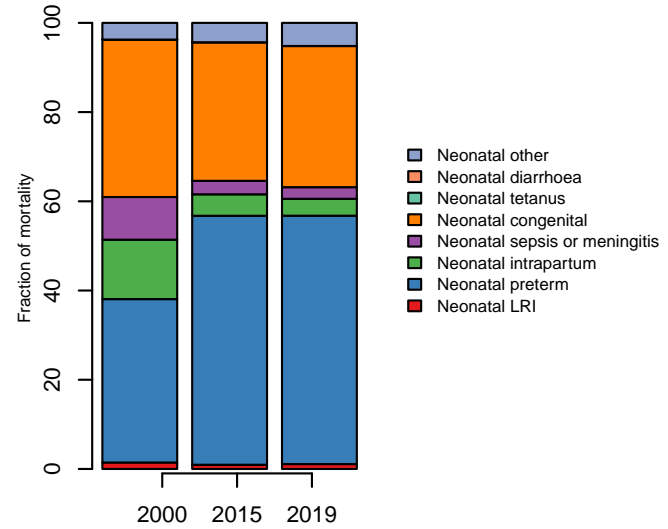

● 2000 – 2015      ● 2015 – 2019 (not on target)      → Deficit to target      ○ 2015 – 2019 (on target)

### Democratic People's Republic of Korea (Under five)

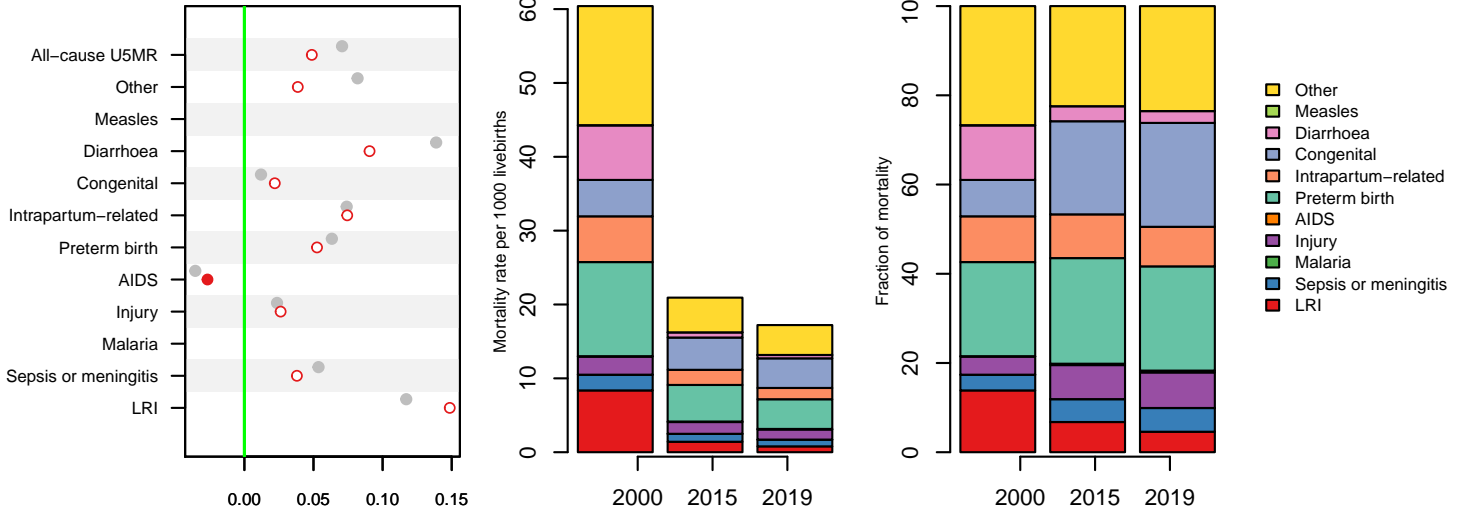

### Democratic People's Republic of Korea (Neonatal)

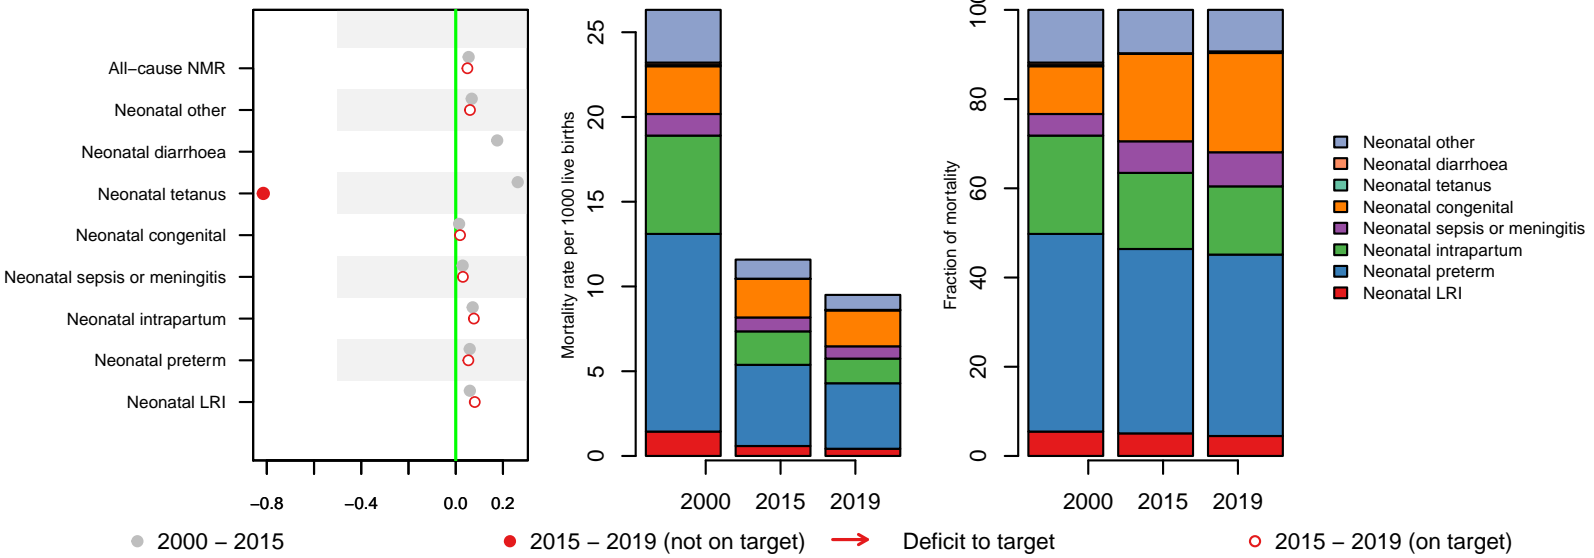

### Portugal (Under five)

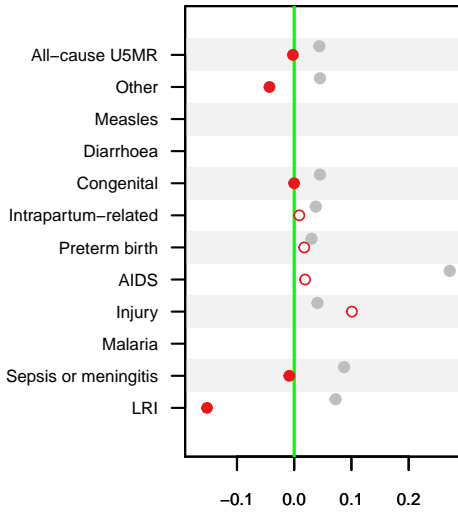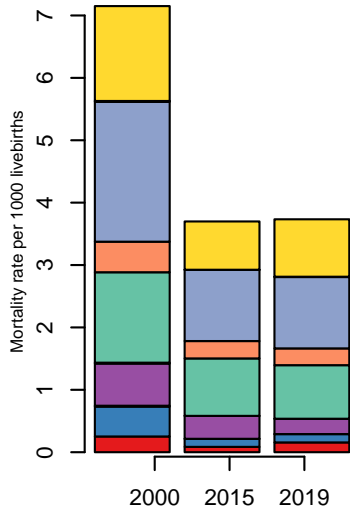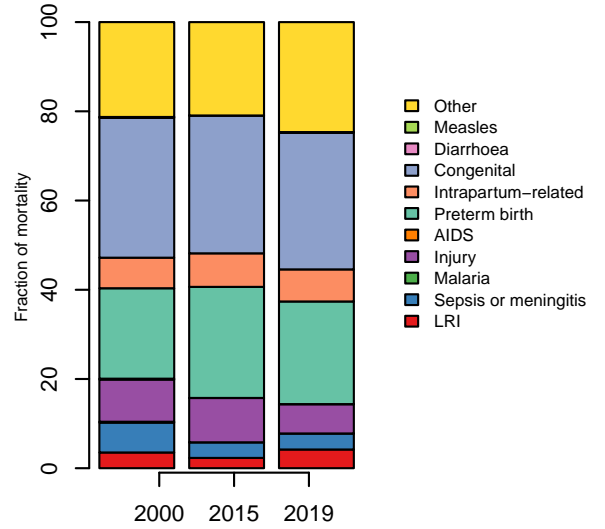

### Portugal (Neonatal)

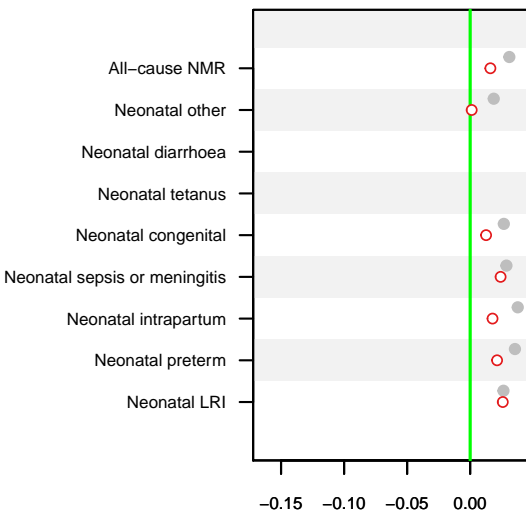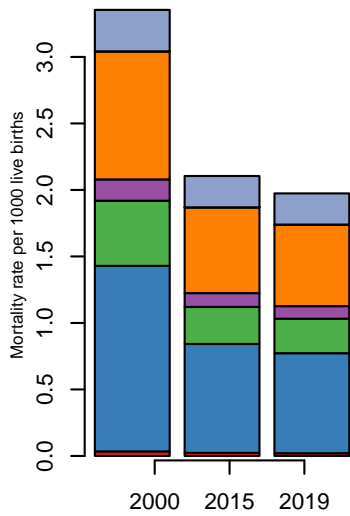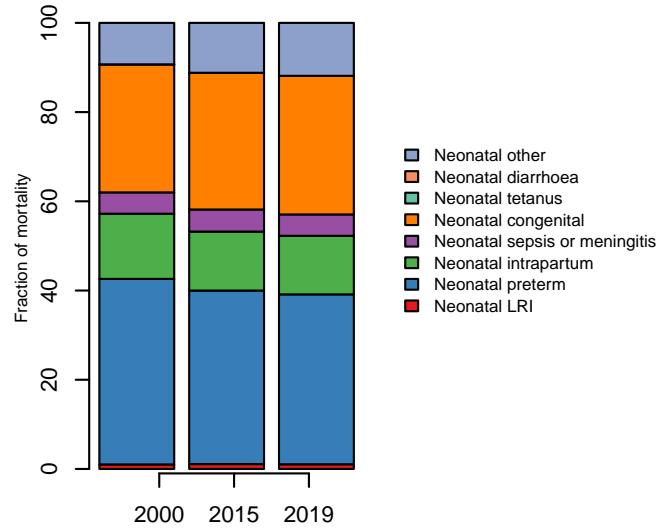

● 2000 – 2015      ● 2015 – 2019 (not on target)      → Deficit to target      ○ 2015 – 2019 (on target)

### Paraguay (Under five)

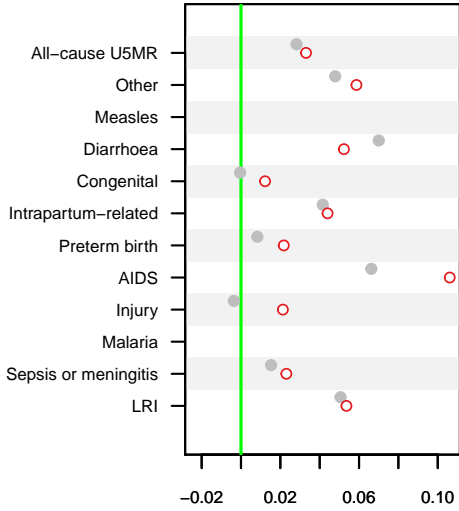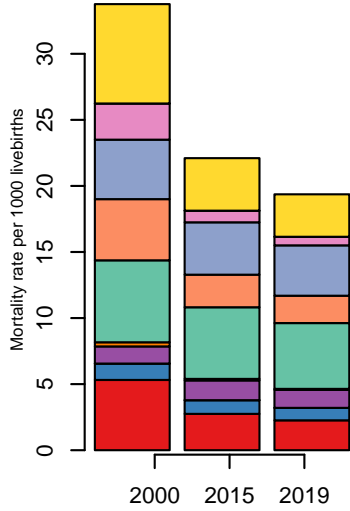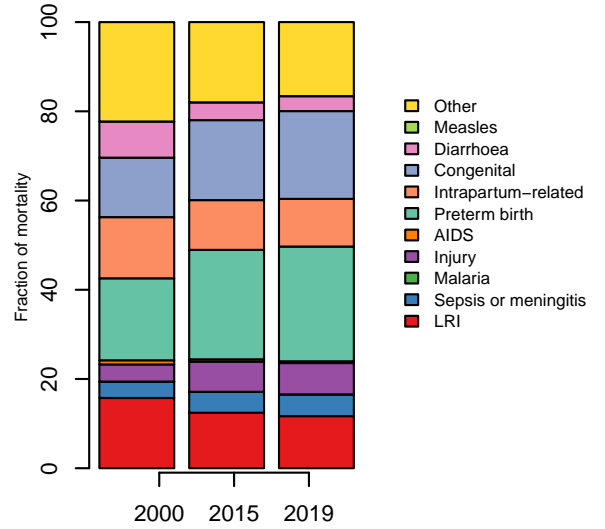

### Paraguay (Neonatal)

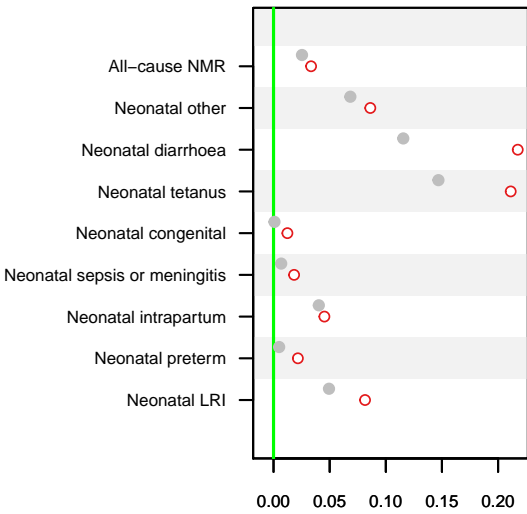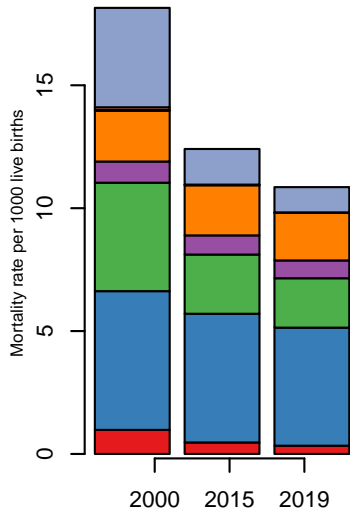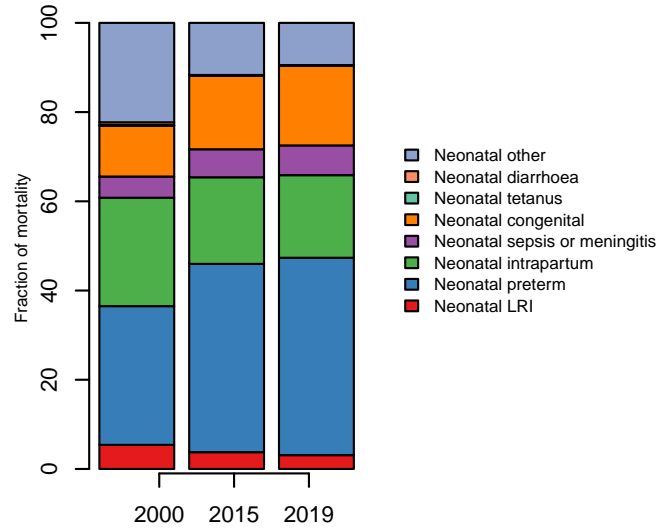

● 2000 – 2015      ● 2015 – 2019 (not on target)      → Deficit to target      ○ 2015 – 2019 (on target)



### Qatar (Under five)

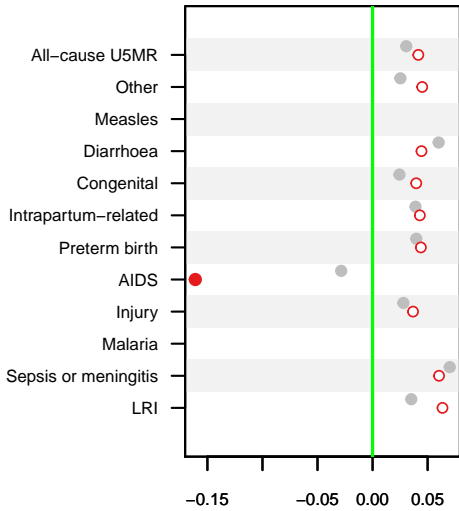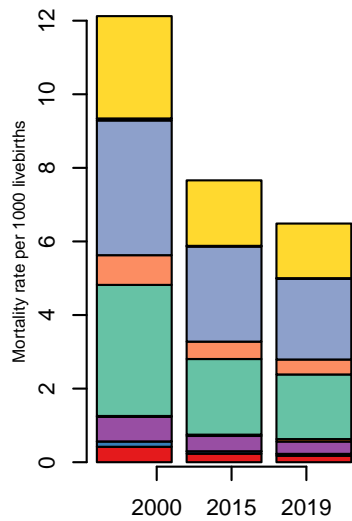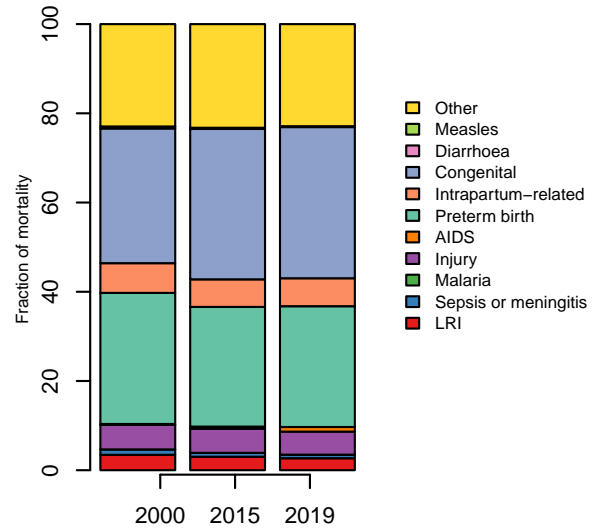

### Qatar (Neonatal)

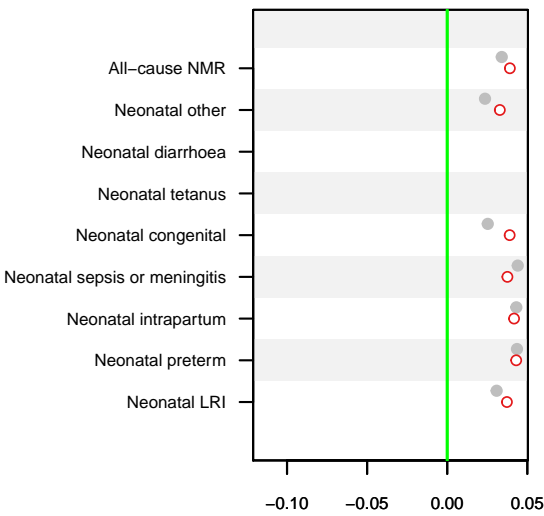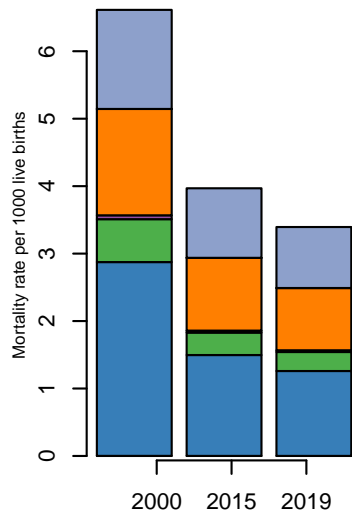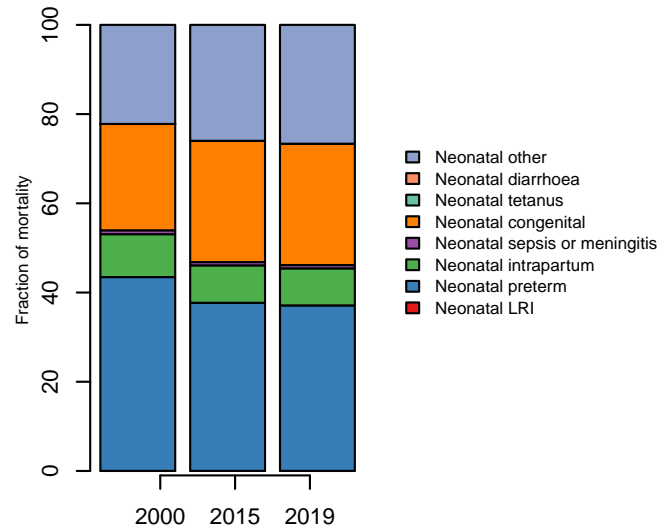

● 2000 – 2015      ● 2015 – 2019 (not on target)      → Deficit to target      ○ 2015 – 2019 (on target)

### Romania (Under five)

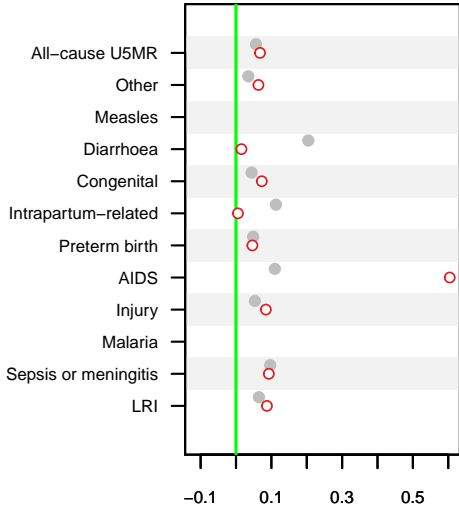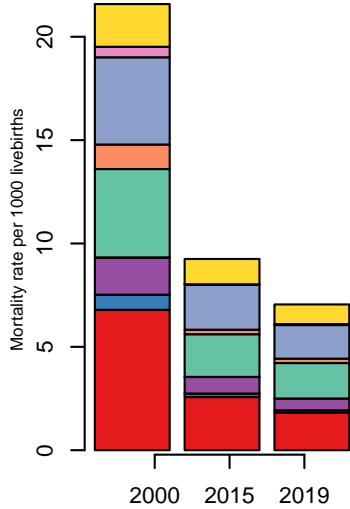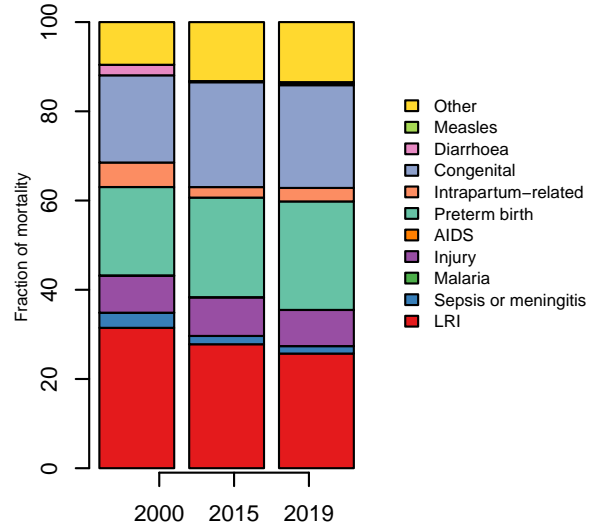

### Romania (Neonatal)

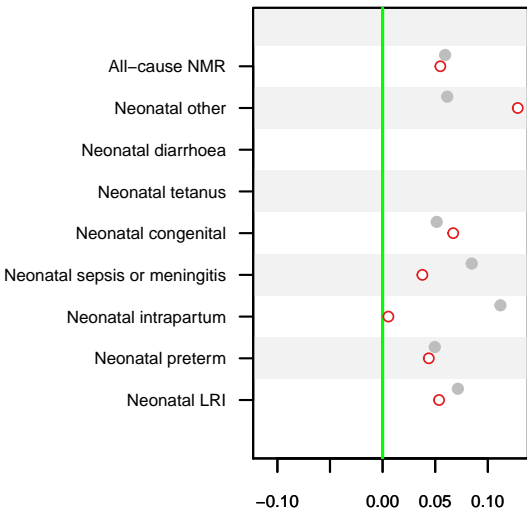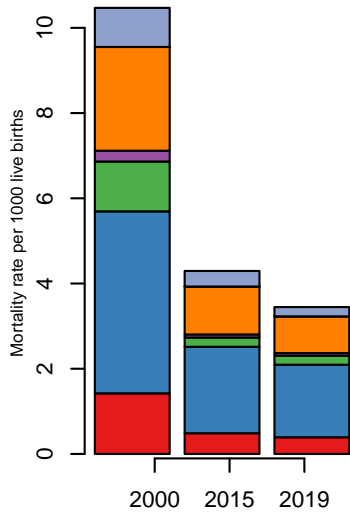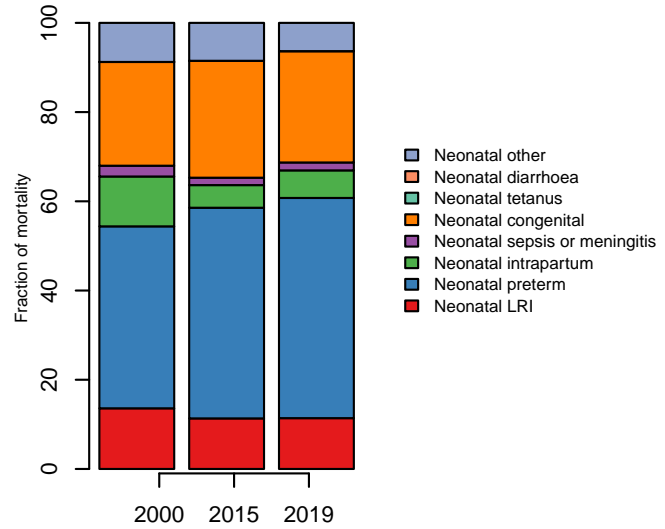

● 2000 – 2015      ● 2015 – 2019 (not on target)      → Deficit to target      ○ 2015 – 2019 (on target)

### Russian Federation (Under five)

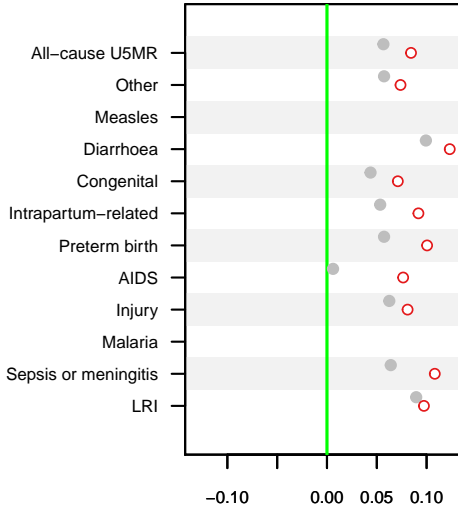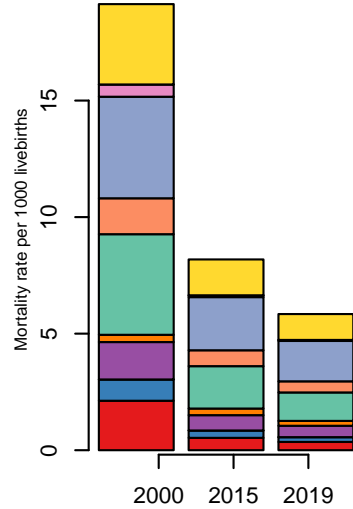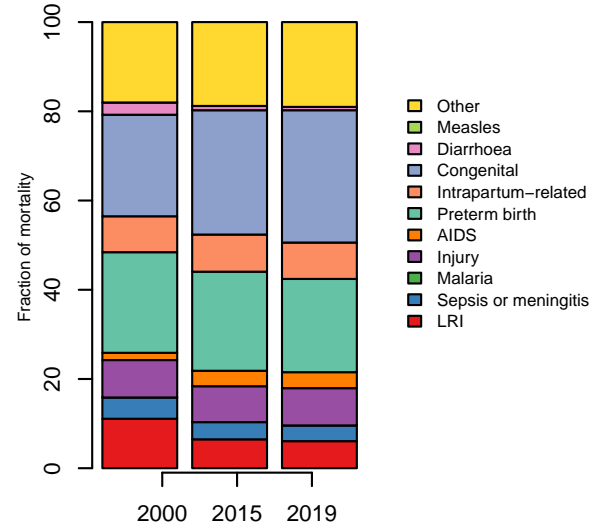

### Russian Federation (Neonatal)

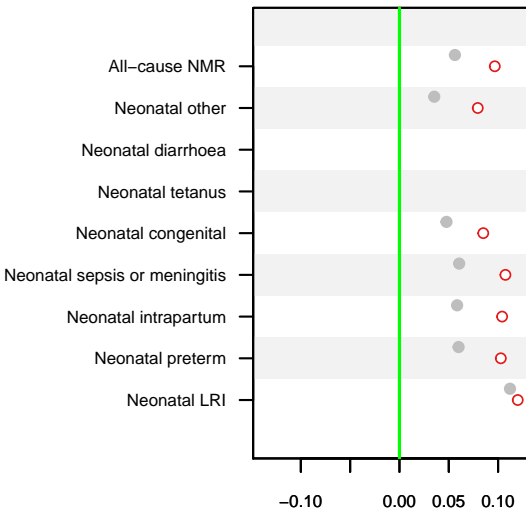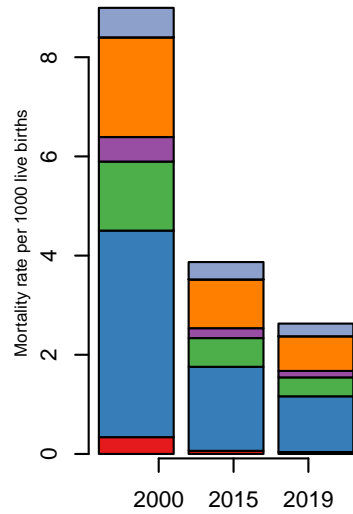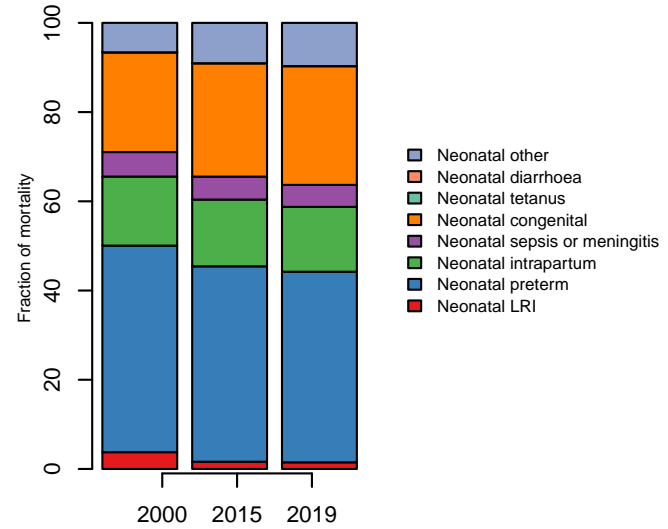

● 2000 – 2015      ● 2015 – 2019 (not on target)      → Deficit to target      ○ 2015 – 2019 (on target)

### Rwanda (Under five)

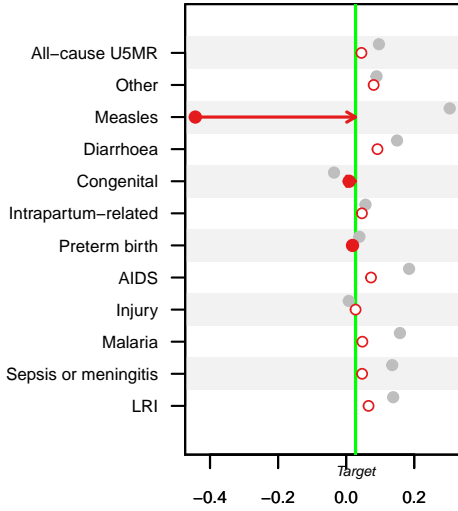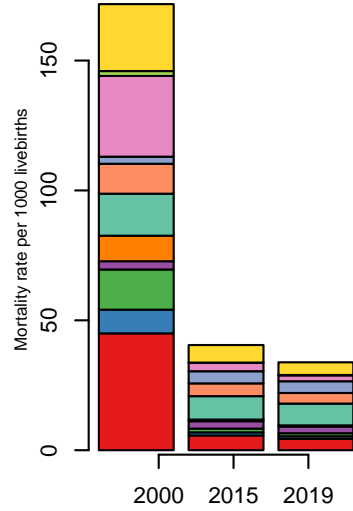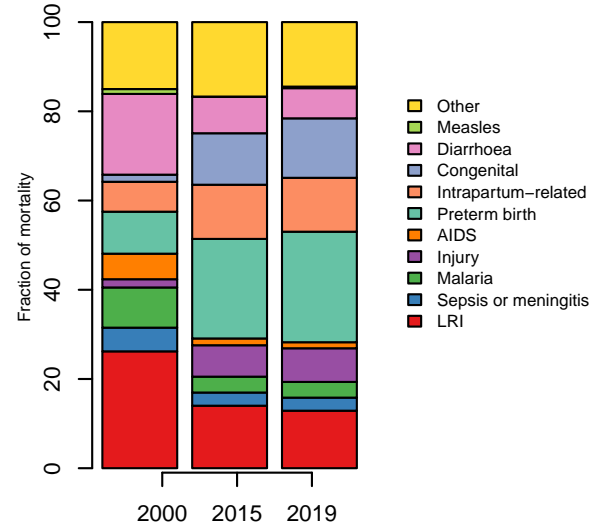

- Other
- Measles
- Diarrhoea
- Congenital
- Intrapartum-related
- Preterm birth
- AIDS
- Injury
- Malaria
- Sepsis or meningitis
- LRI

### Rwanda (Neonatal)

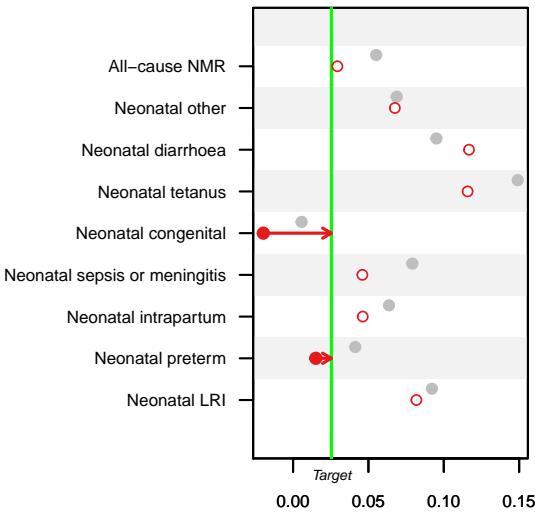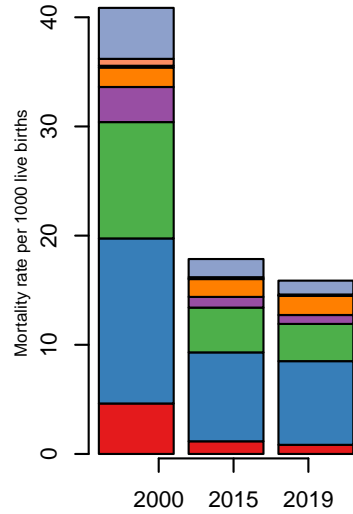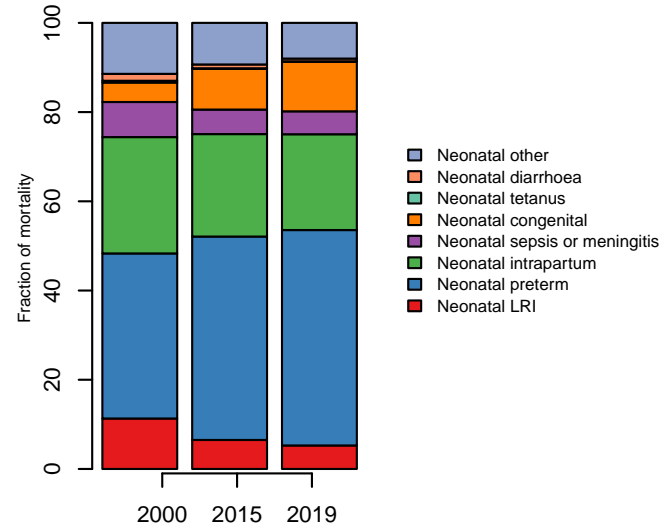

- Neonatal other
- Neonatal diarrhoea
- Neonatal tetanus
- Neonatal congenital
- Neonatal sepsis or meningitis
- Neonatal intrapartum
- Neonatal preterm
- Neonatal LRI

● 2000 – 2015      ● 2015 – 2019 (not on target)      → Deficit to target      ○ 2015 – 2019 (on target)

### Saudi Arabia (Under five)

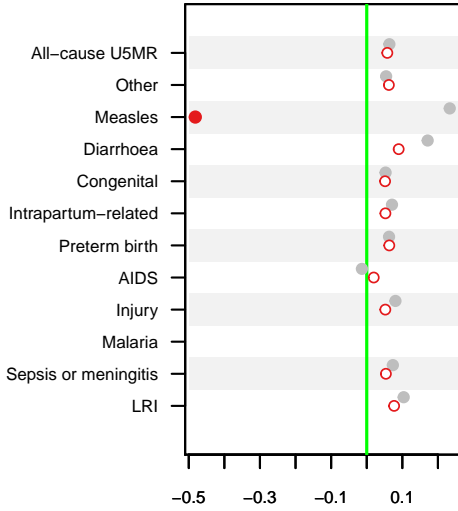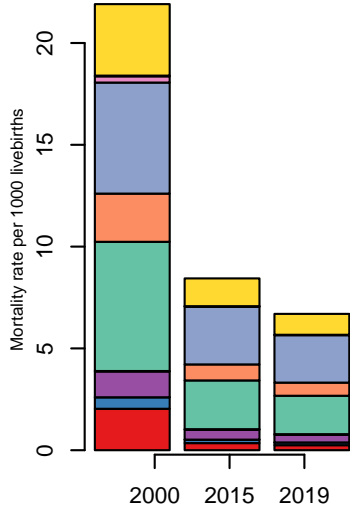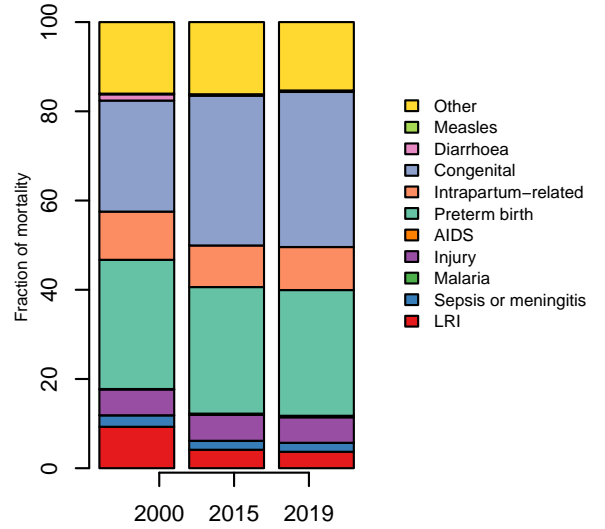

### Saudi Arabia (Neonatal)

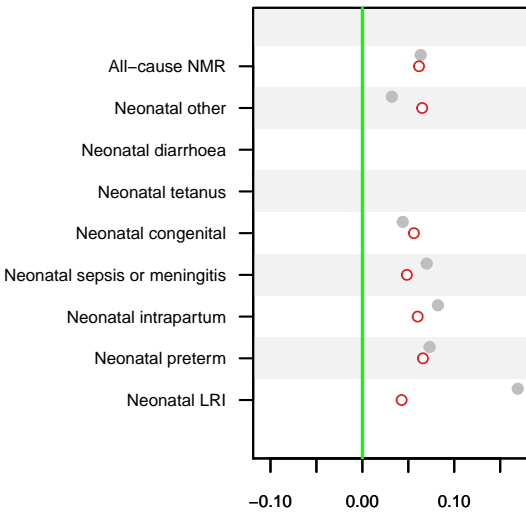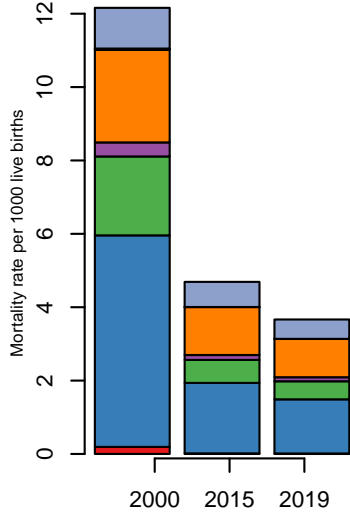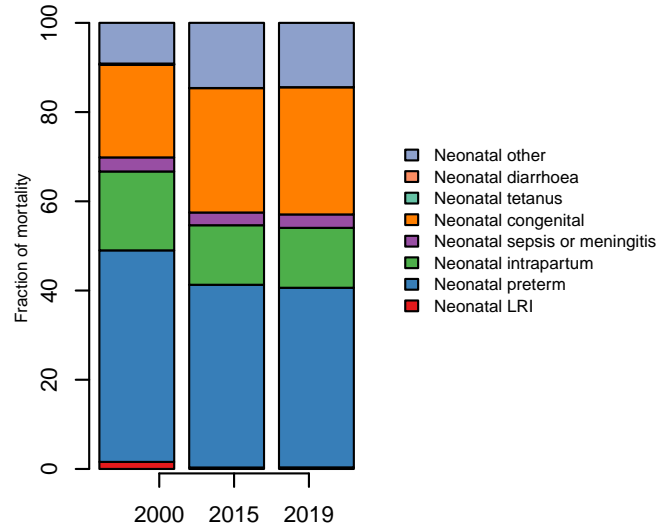

● 2000 – 2015      ● 2015 – 2019 (not on target)      → Deficit to target      ○ 2015 – 2019 (on target)

### Sudan (Under five)

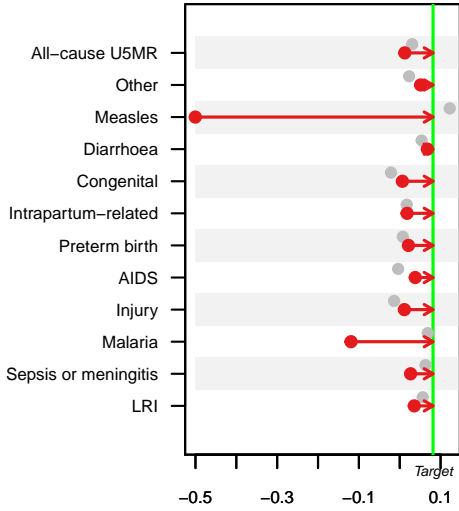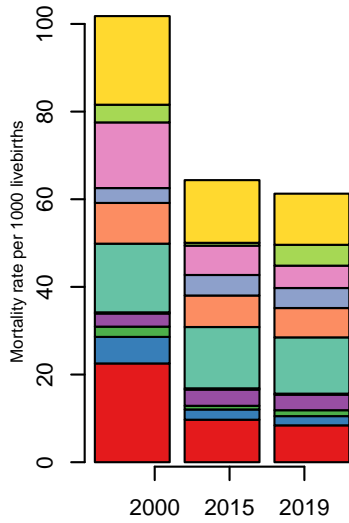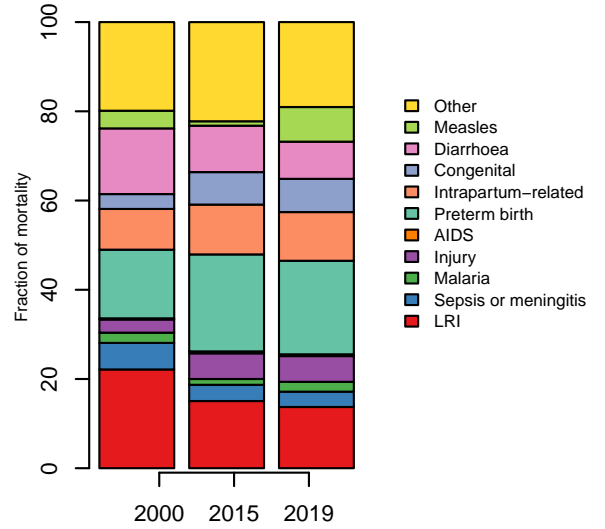

### Sudan (Neonatal)

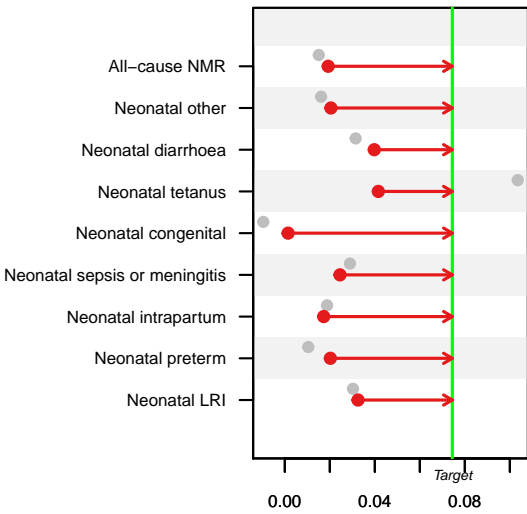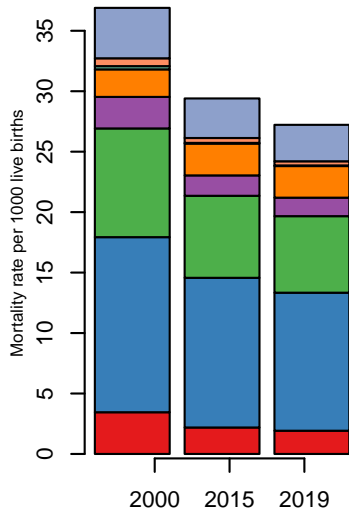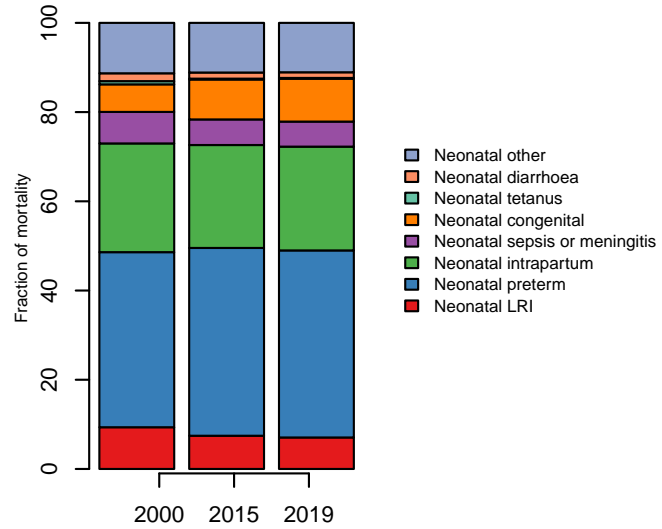

● 2000 – 2015      ● 2015 – 2019 (not on target)      → Deficit to target      ○ 2015 – 2019 (on target)

### Senegal (Under five)

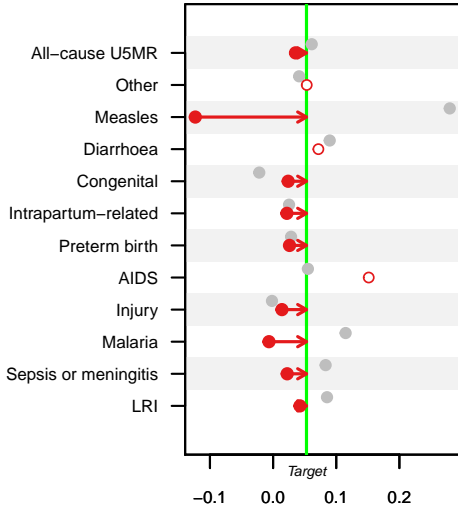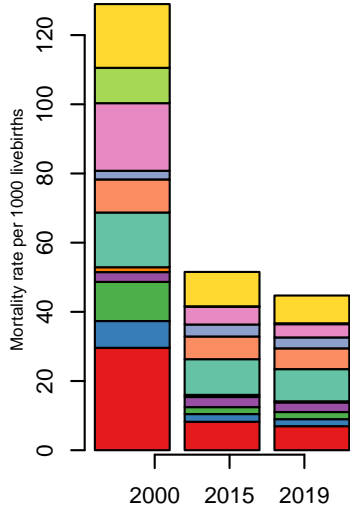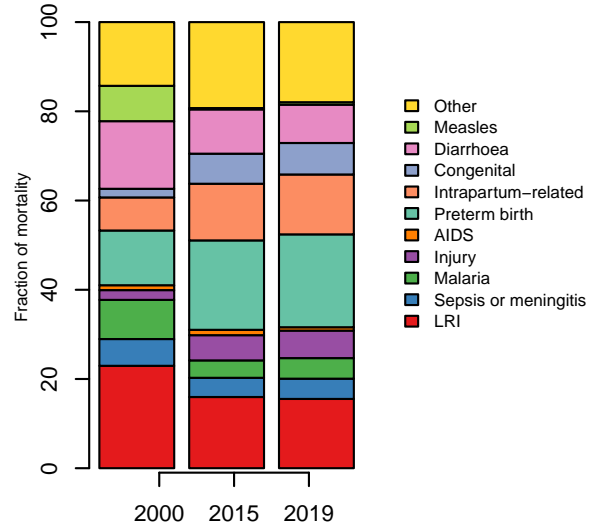

### Senegal (Neonatal)

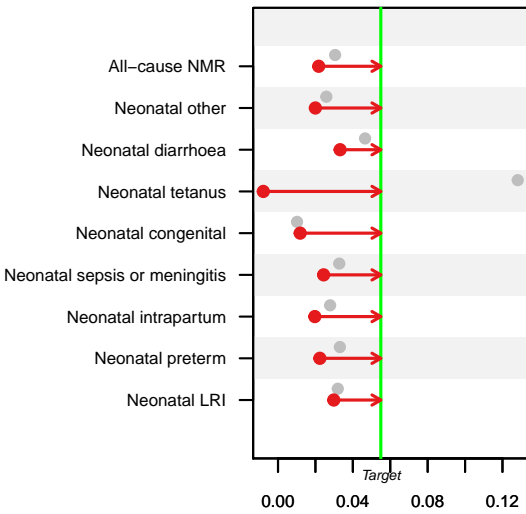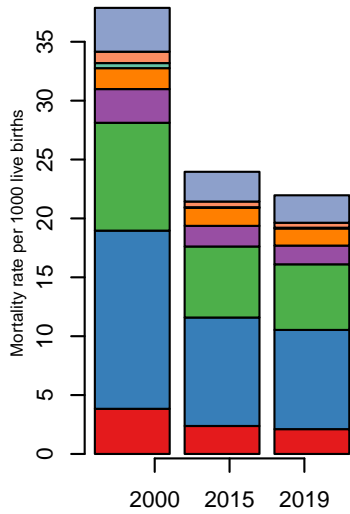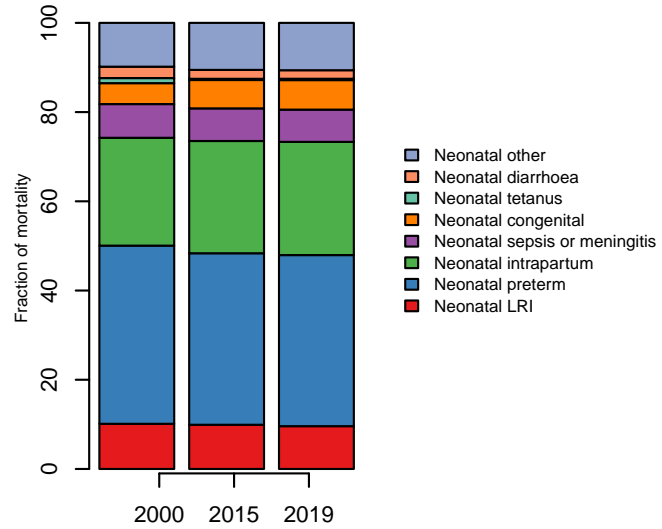

● 2000 – 2015      ● 2015 – 2019 (not on target)      → Deficit to target      ○ 2015 – 2019 (on target)

### Singapore (Under five)

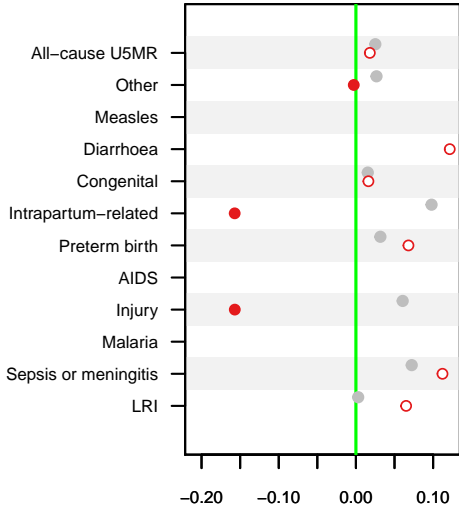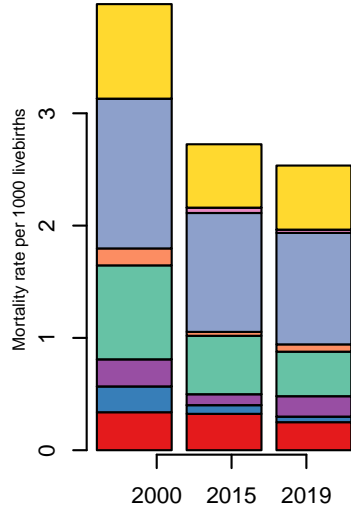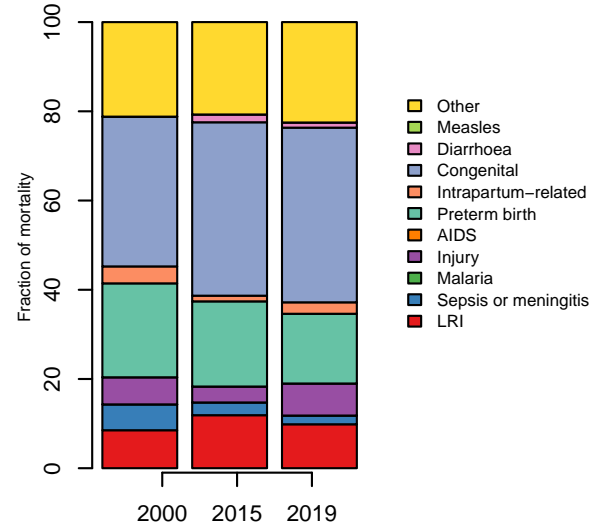

### Singapore (Neonatal)

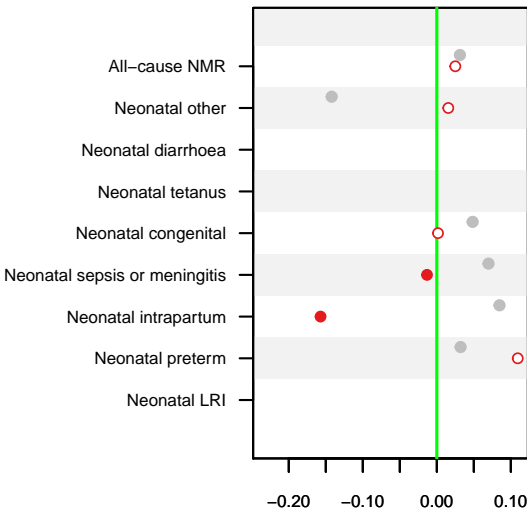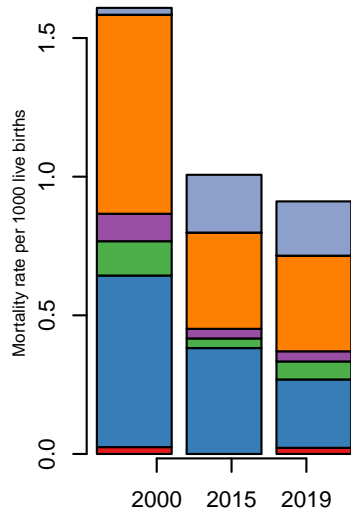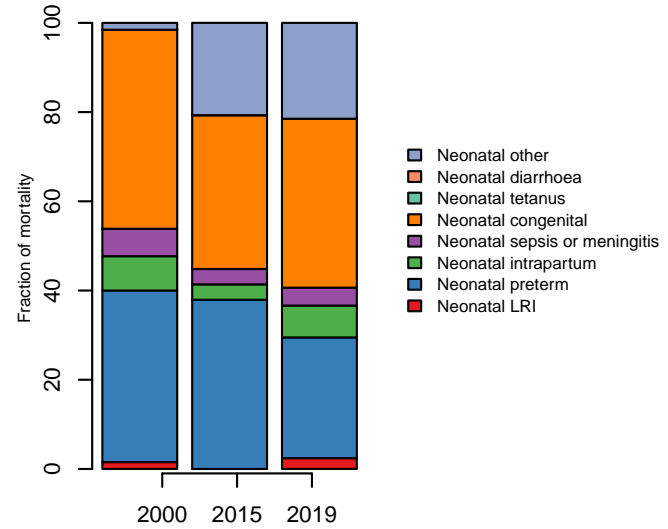

● 2000 – 2015      ● 2015 – 2019 (not on target)      → Deficit to target      ○ 2015 – 2019 (on target)



### Solomon Islands (Under five)

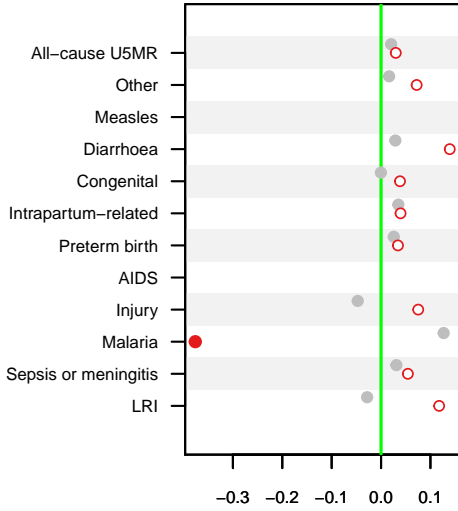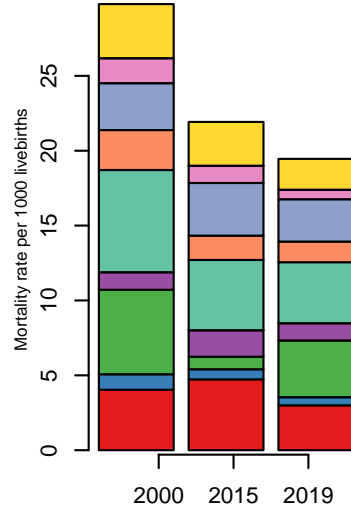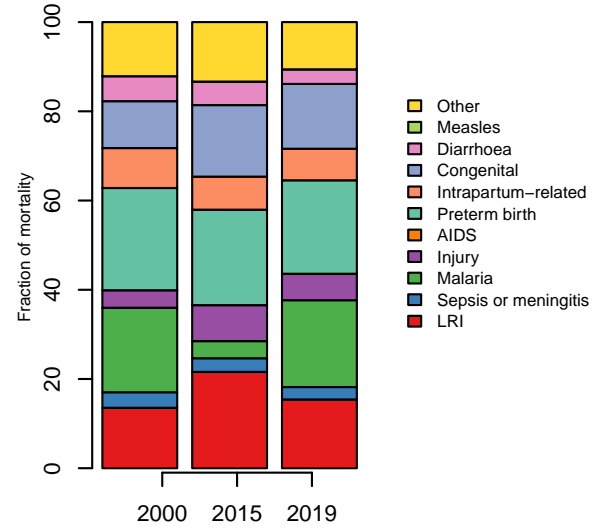

- Other
- Measles
- Diarrhoea
- Congenital
- Intrapartum-related
- AIDS
- Injury
- Malaria
- Sepsis or meningitis
- LRI

### Solomon Islands (Neonatal)

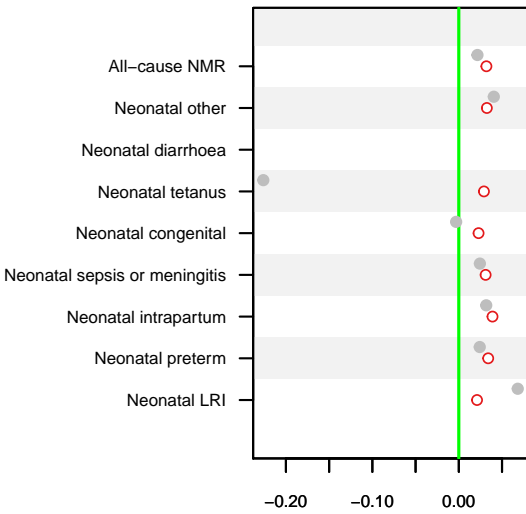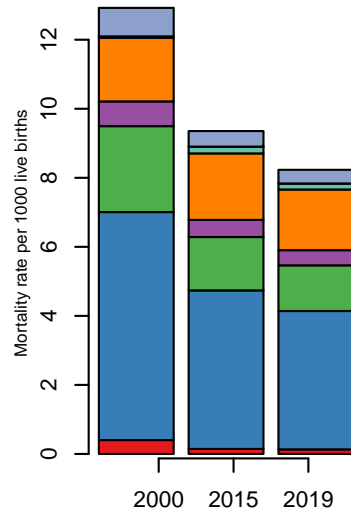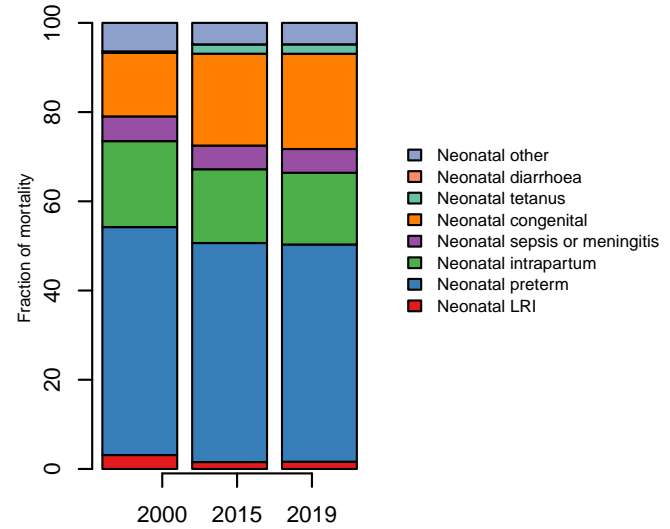

- Neonatal other
- Neonatal diarrhoea
- Neonatal tetanus
- Neonatal congenital
- Neonatal sepsis or meningitis
- Neonatal intrapartum
- Neonatal preterm
- Neonatal LRI

● 2000 – 2015      ● 2015 – 2019 (not on target)      → Deficit to target      ○ 2015 – 2019 (on target)

### Sierra Leone (Under five)

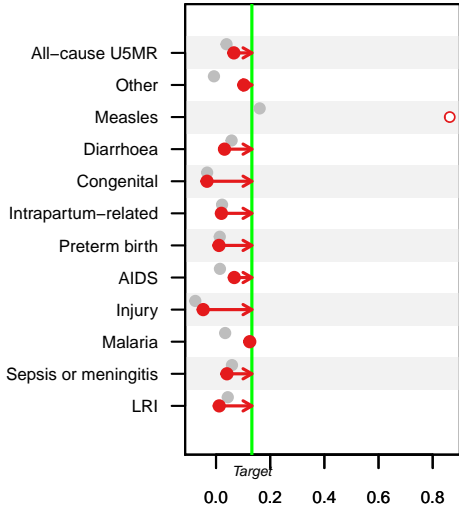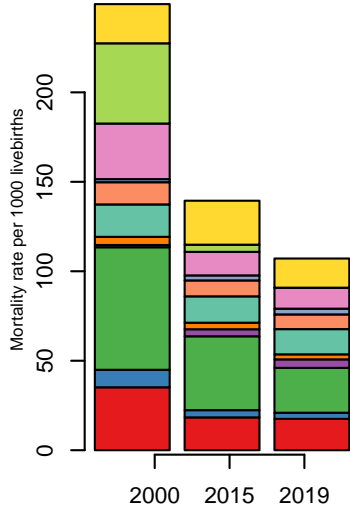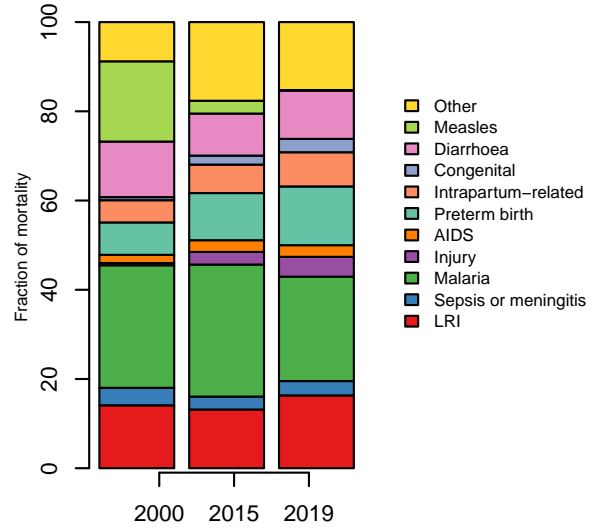

### Sierra Leone (Neonatal)

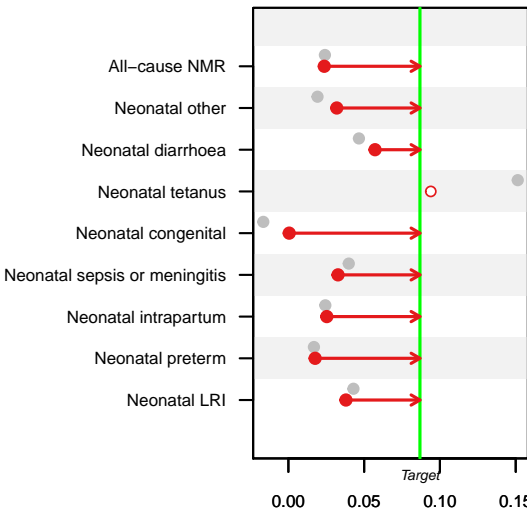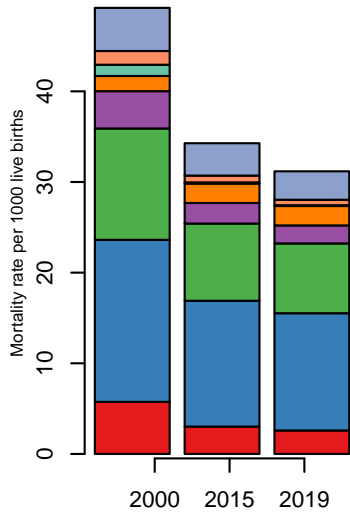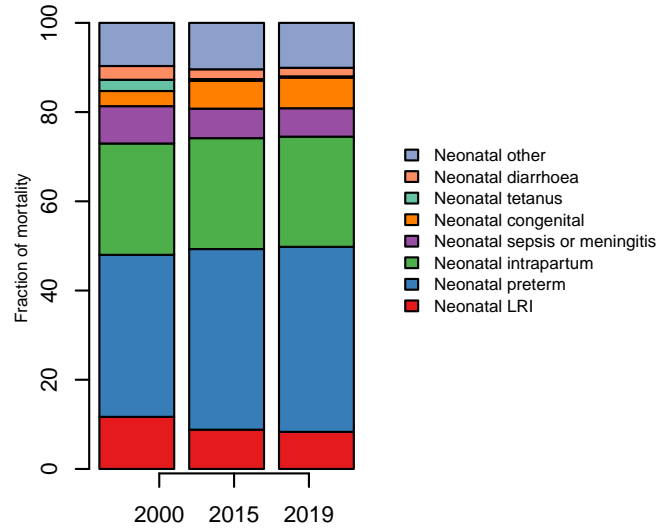

● 2000 – 2015      ● 2015 – 2019 (not on target)      → Deficit to target      ○ 2015 – 2019 (on target)

### EI Salvador (Under five)

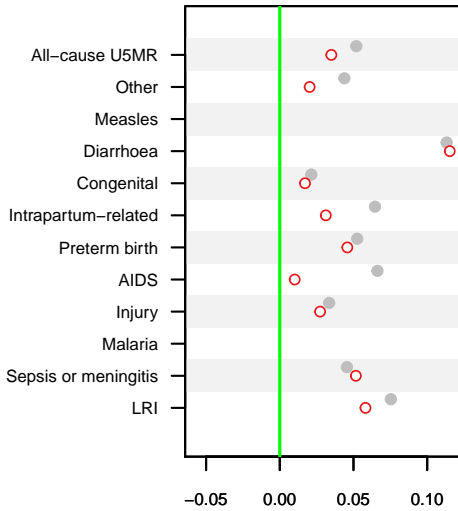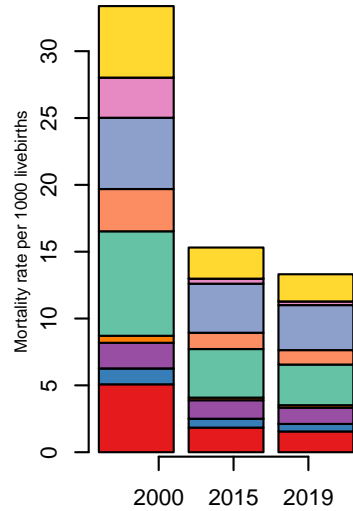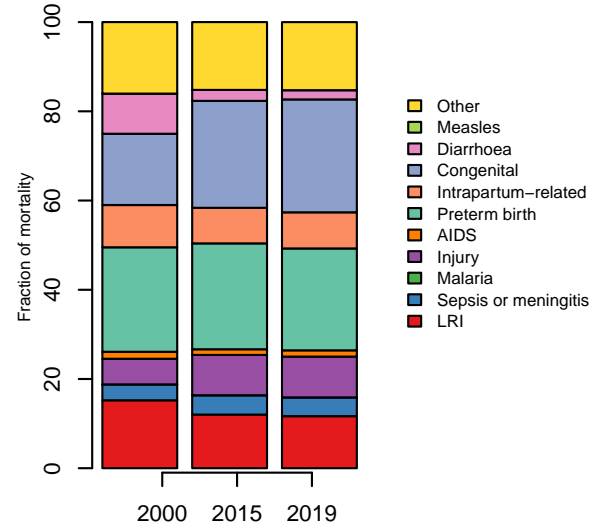

### EI Salvador (Neonatal)

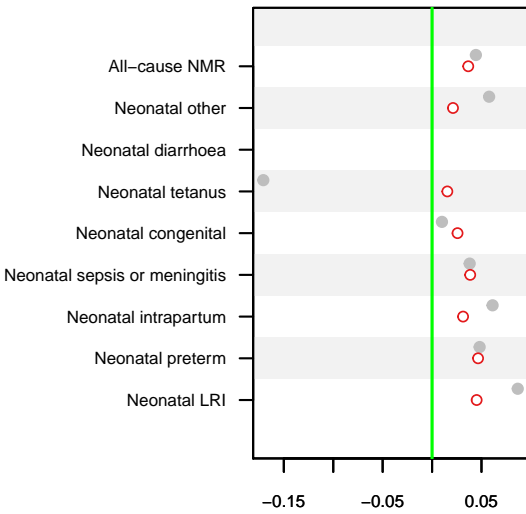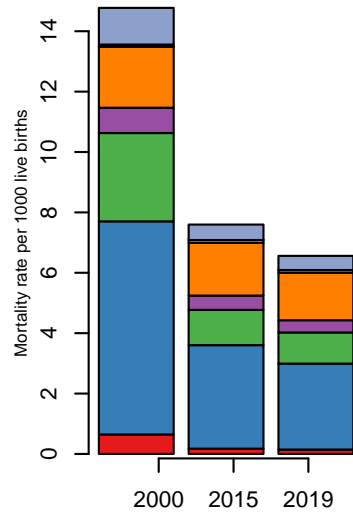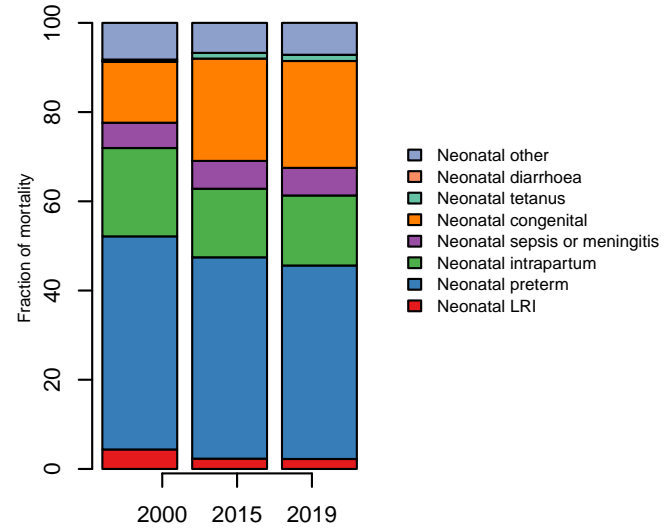

● 2000 – 2015      ● 2015 – 2019 (not on target)      → Deficit to target      ○ 2015 – 2019 (on target)

### Somalia (Under five)

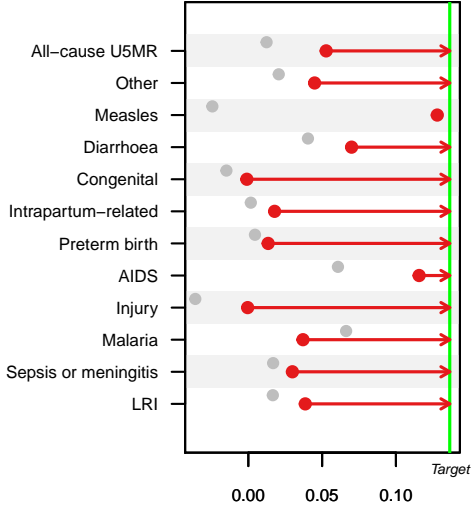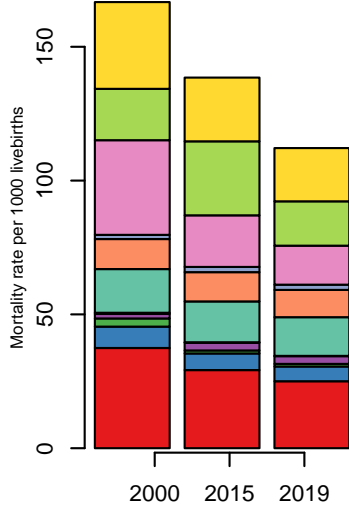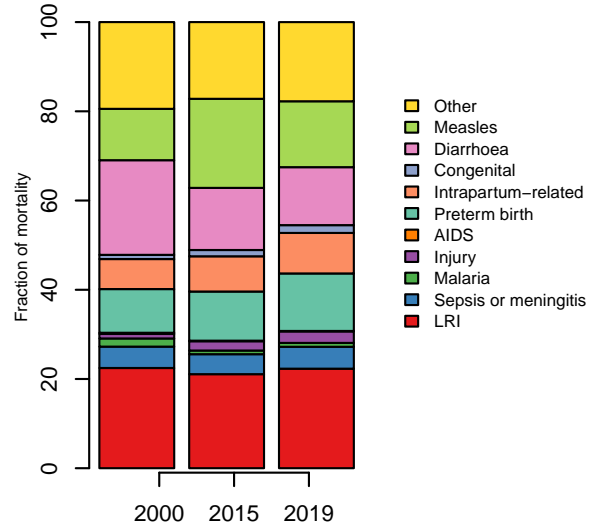

### Somalia (Neonatal)

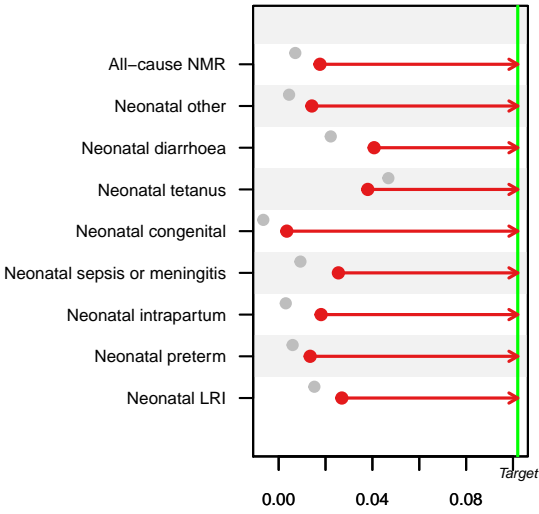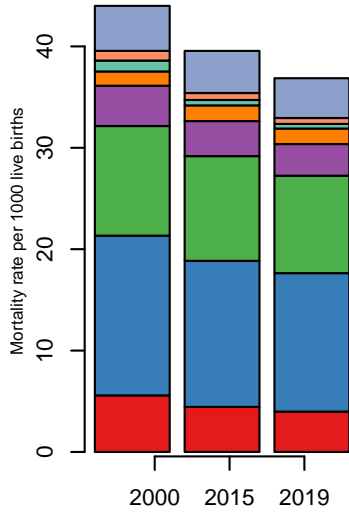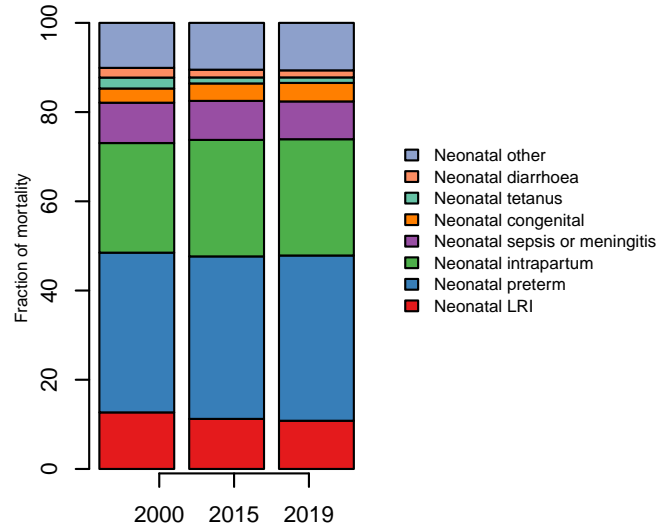

● 2000 – 2015      ● 2015 – 2019 (not on target)      → Deficit to target      ○ 2015 – 2019 (on target)

### Serbia (Under five)

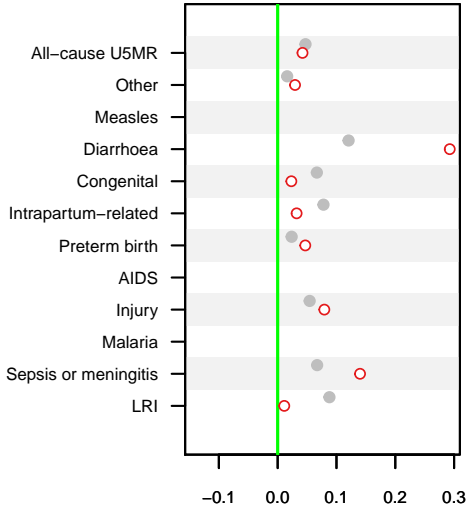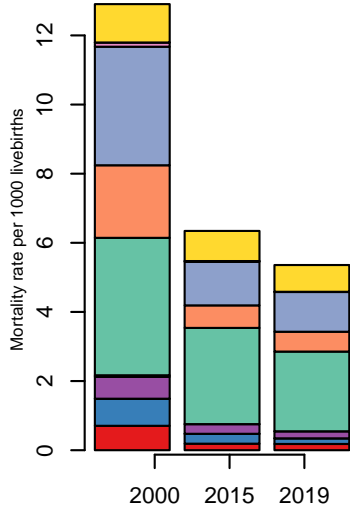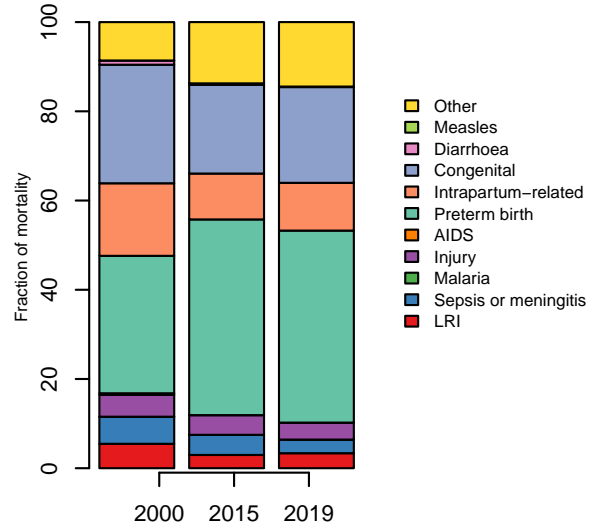

### Serbia (Neonatal)

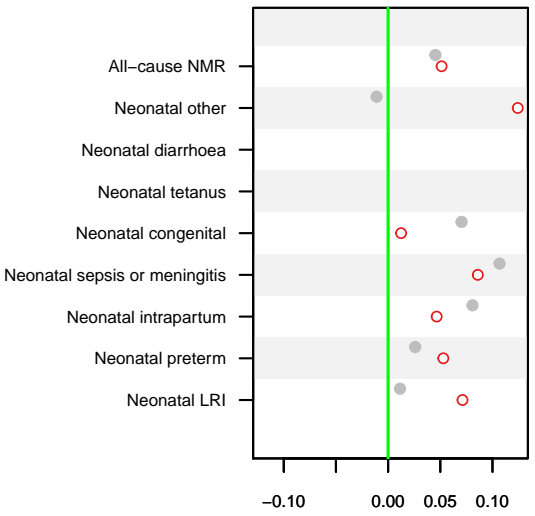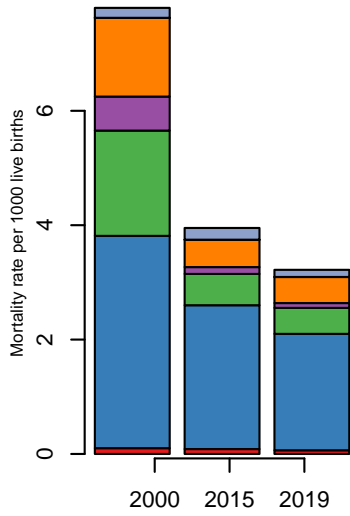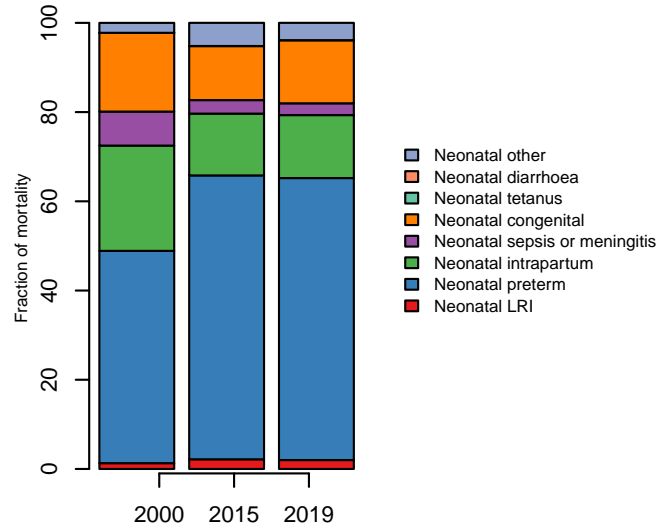

● 2000 – 2015      ● 2015 – 2019 (not on target)      → Deficit to target      ○ 2015 – 2019 (on target)

### South Sudan (Under five)

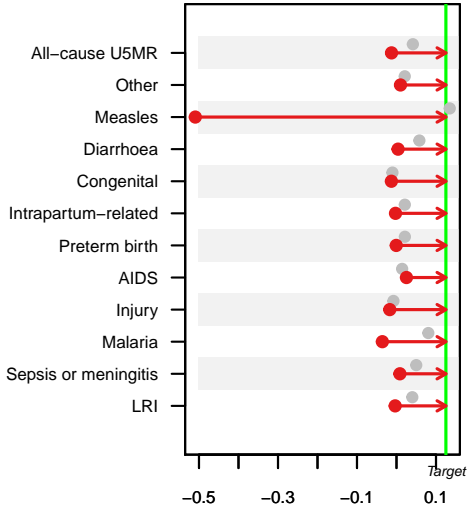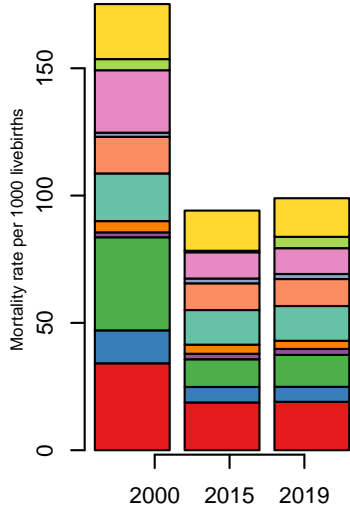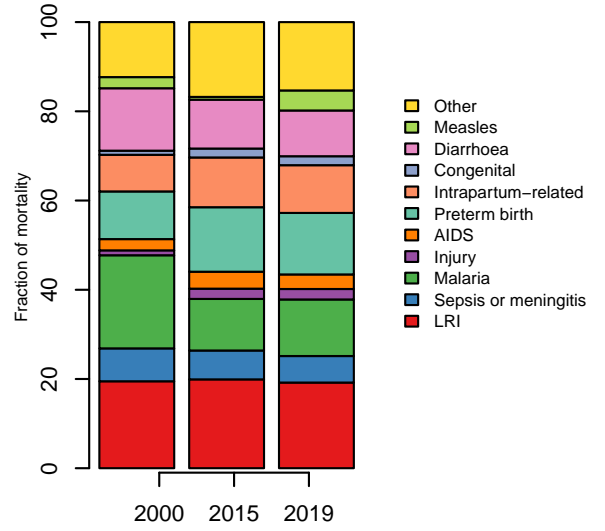

### South Sudan (Neonatal)

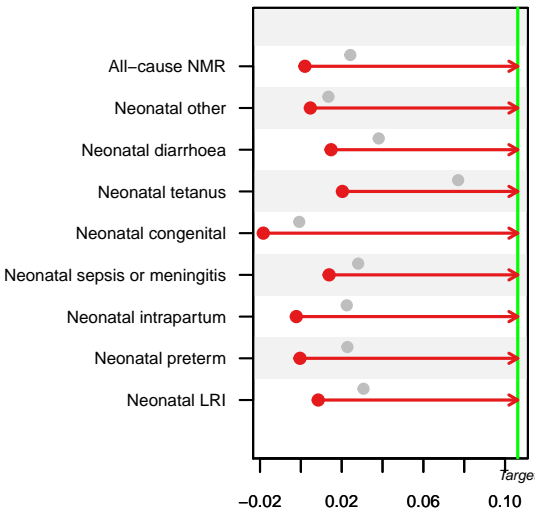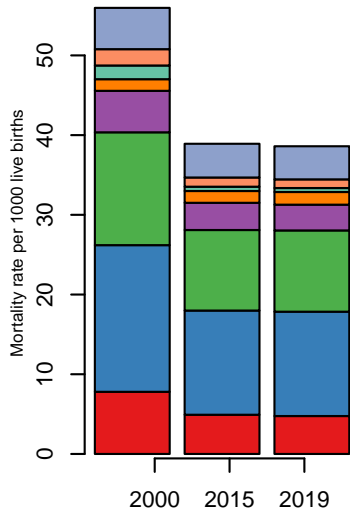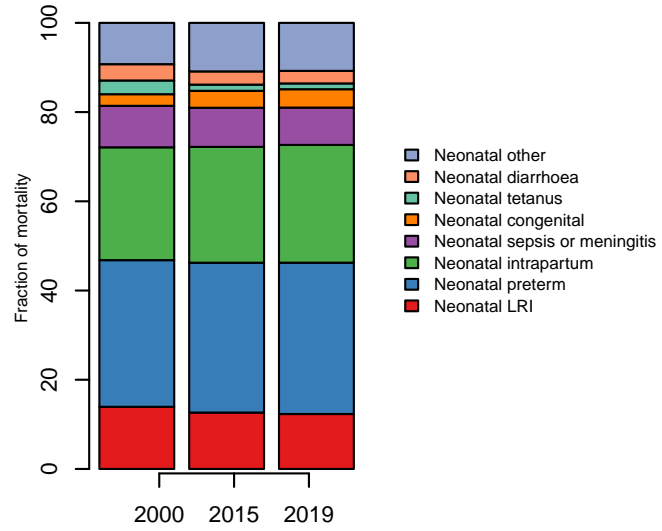

● 2000 – 2015      ● 2015 – 2019 (not on target)      → Deficit to target      ○ 2015 – 2019 (on target)

### Sao Tome and Principe (Under five)

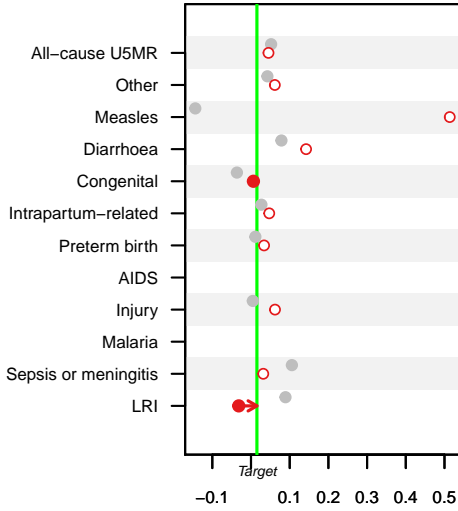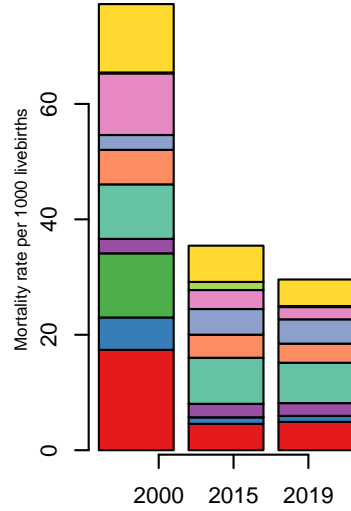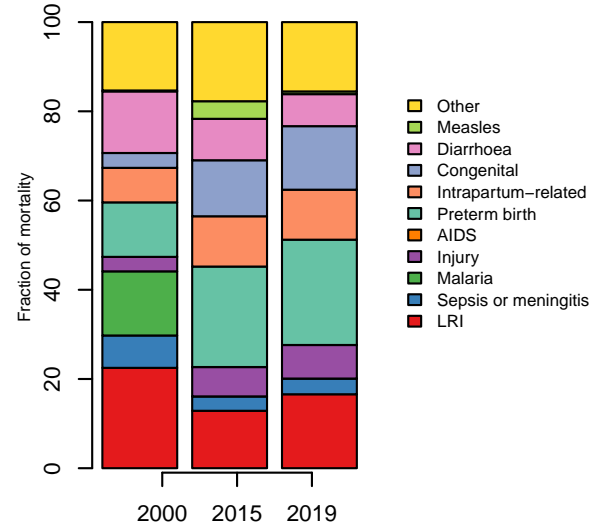

### Sao Tome and Principe (Neonatal)

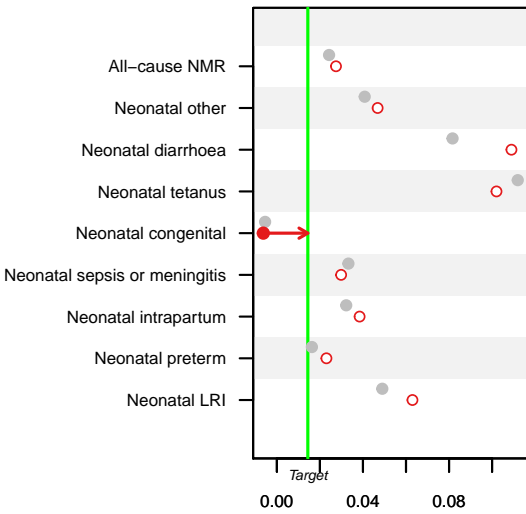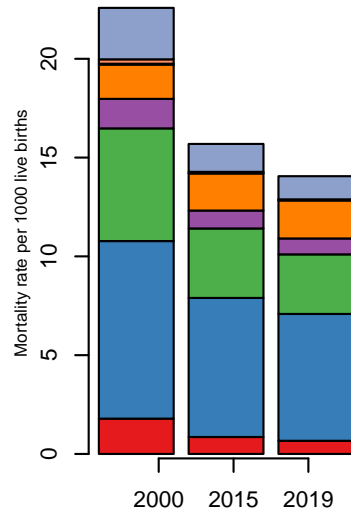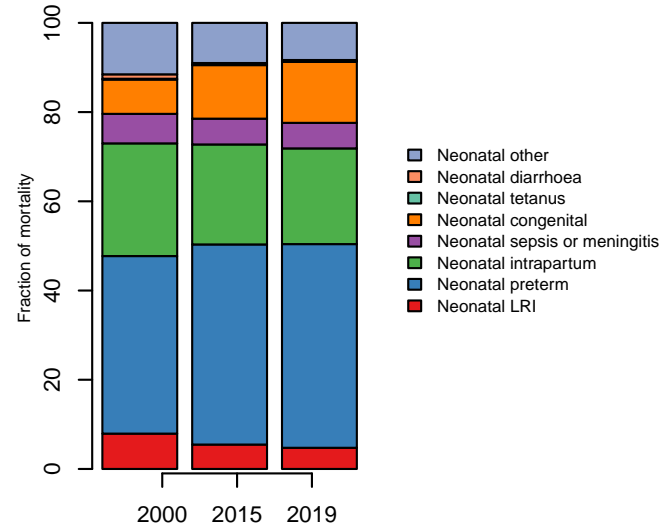

● 2000 – 2015      ● 2015 – 2019 (not on target)      → Deficit to target      ○ 2015 – 2019 (on target)

### Suriname (Under five)

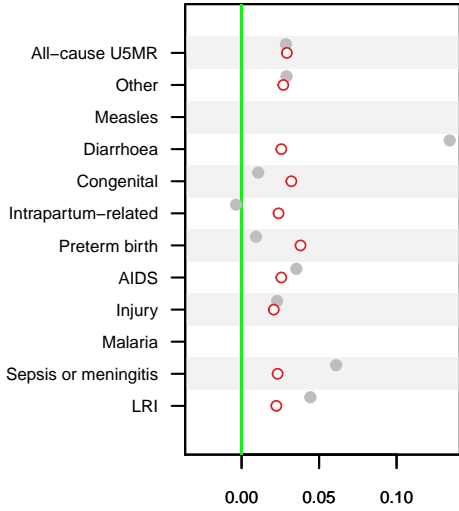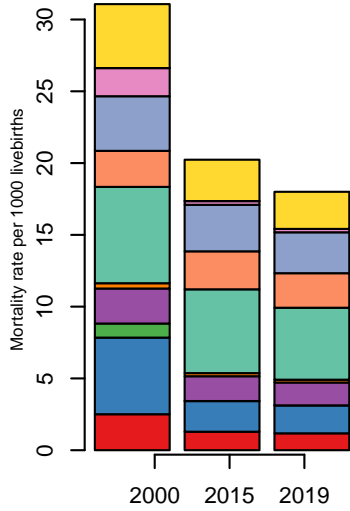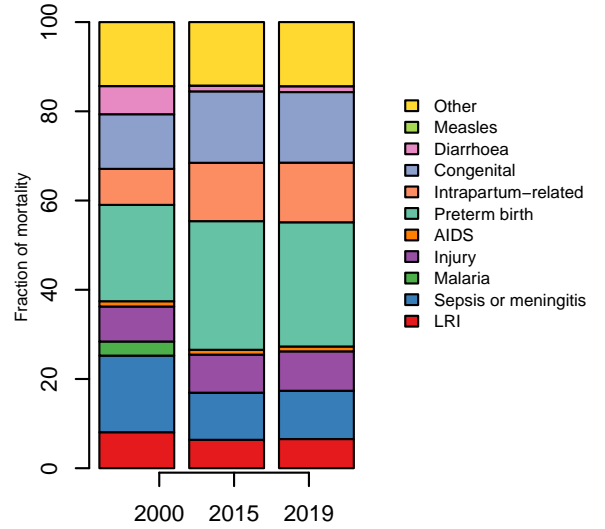

### Suriname (Neonatal)

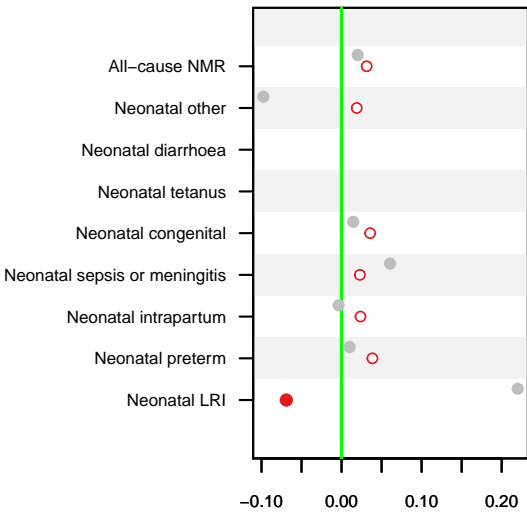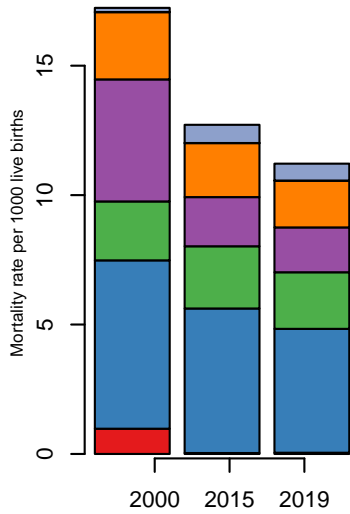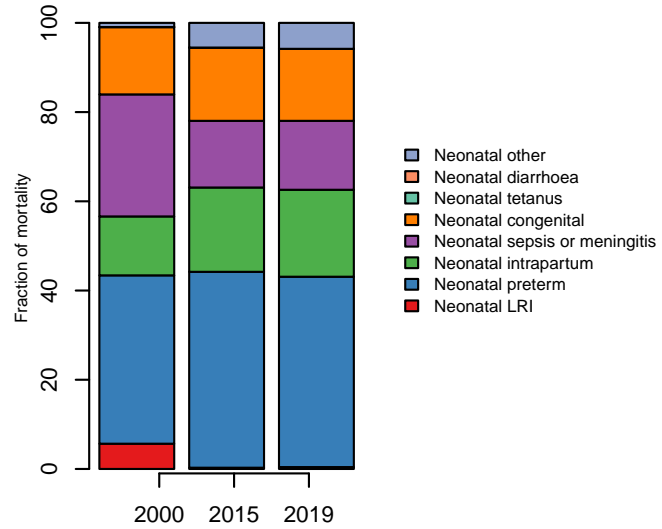

● 2000 – 2015      ● 2015 – 2019 (not on target)      → Deficit to target      ○ 2015 – 2019 (on target)



### Slovakia (Under five)

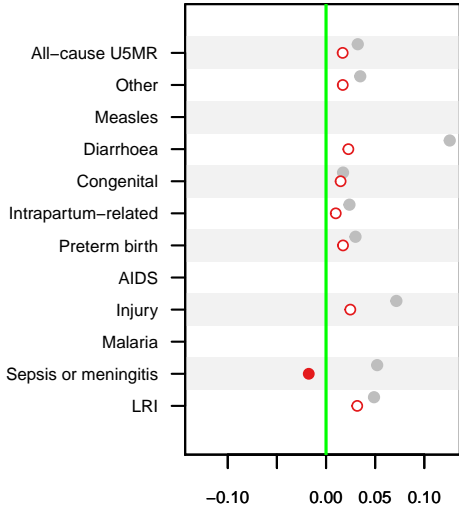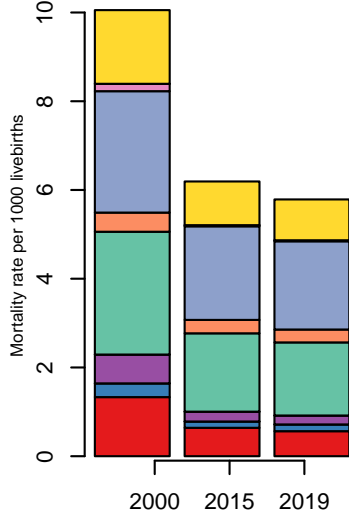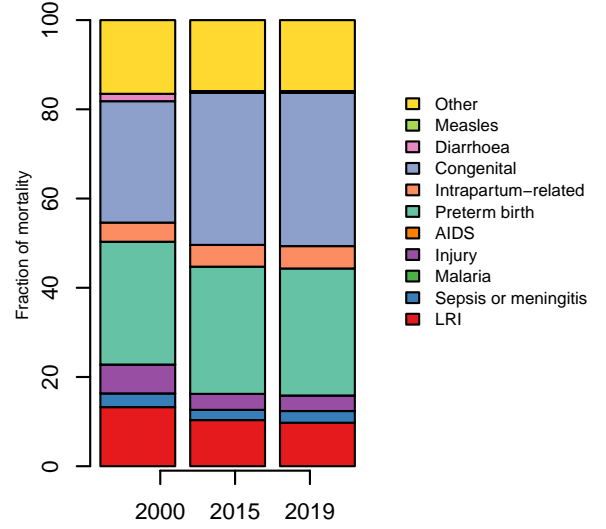

### Slovakia (Neonatal)

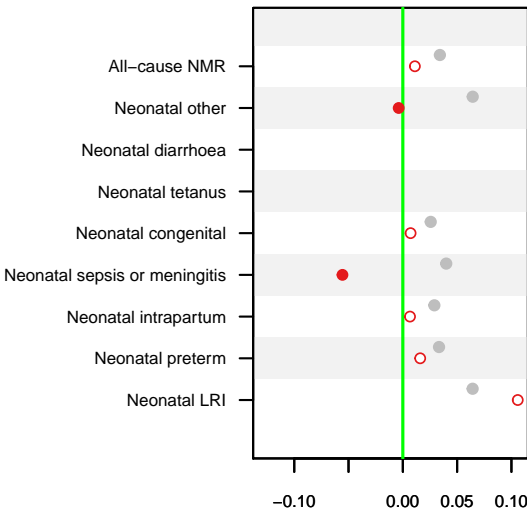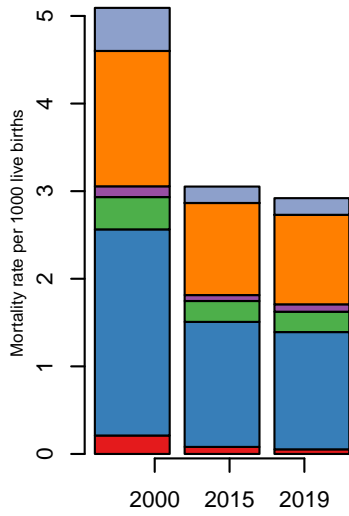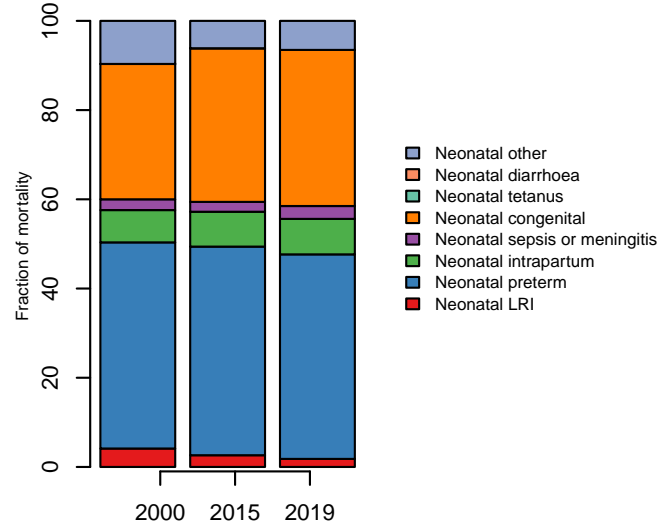

● 2000 – 2015      ● 2015 – 2019 (not on target)      → Deficit to target      ○ 2015 – 2019 (on target)

### Sweden (Under five)

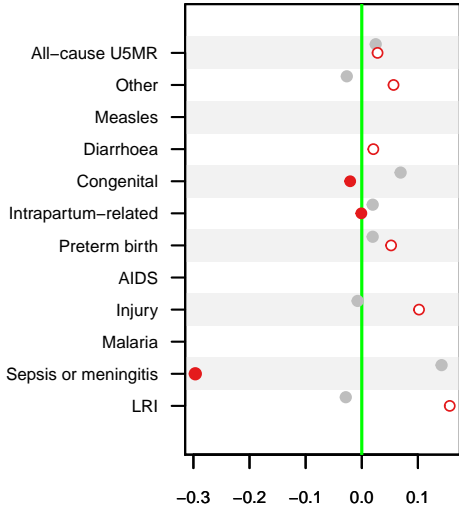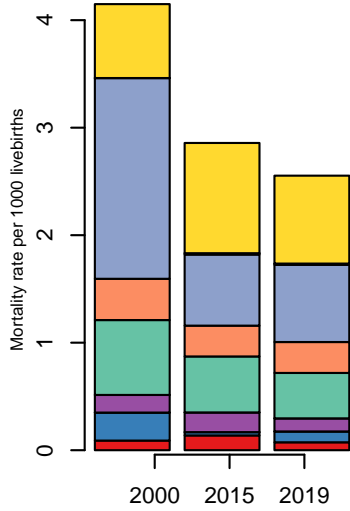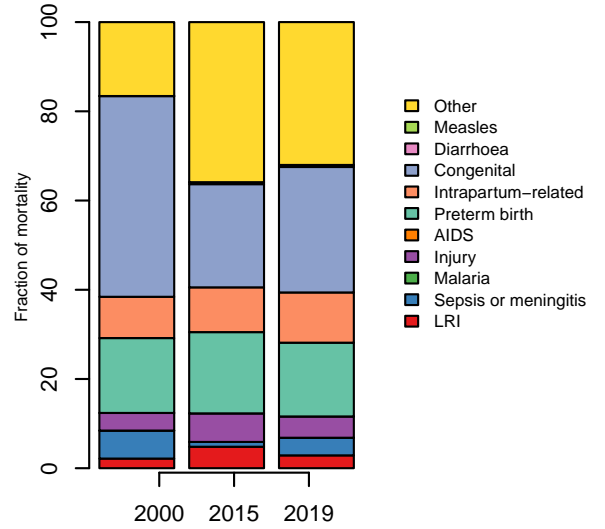

### Sweden (Neonatal)

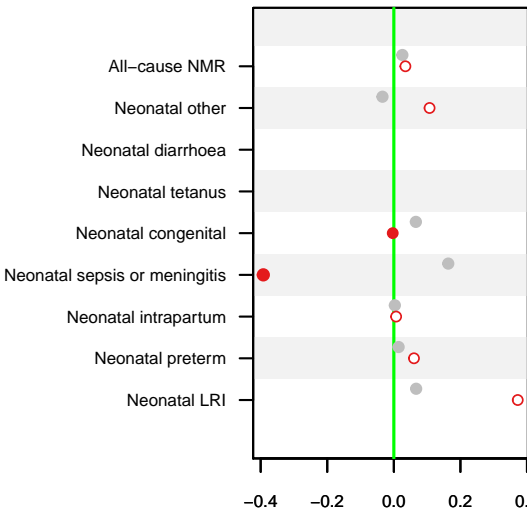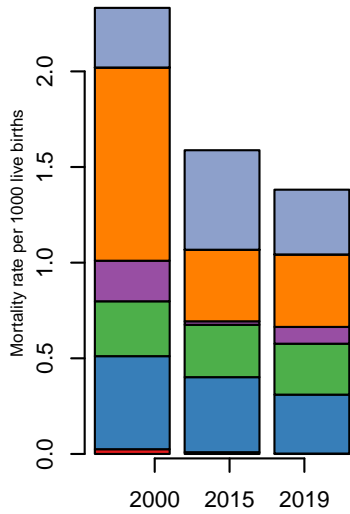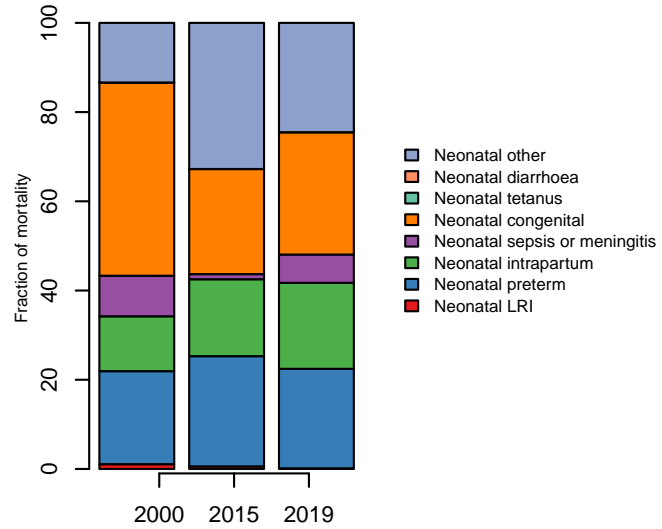

● 2000 – 2015      ● 2015 – 2019 (not on target)      → Deficit to target      ○ 2015 – 2019 (on target)

### Eswatini (Under five)

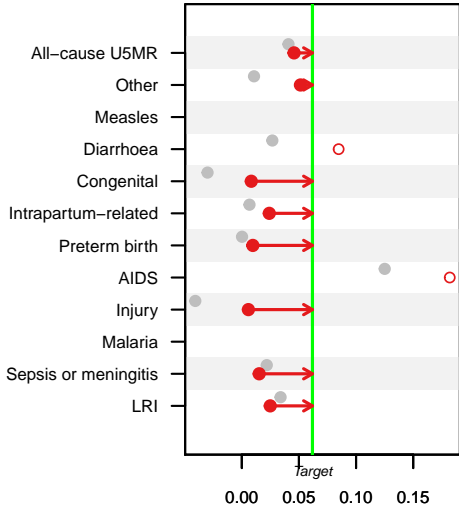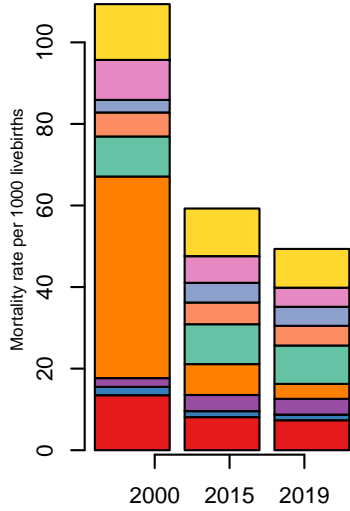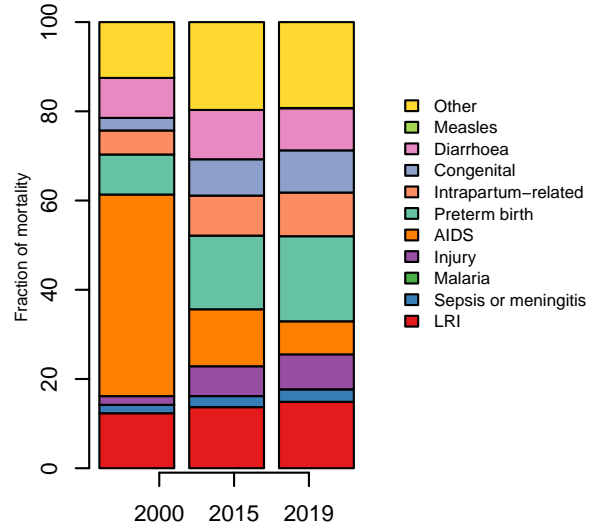

### Eswatini (Neonatal)

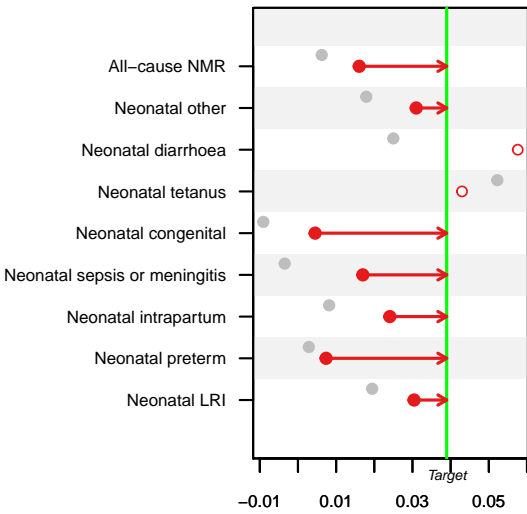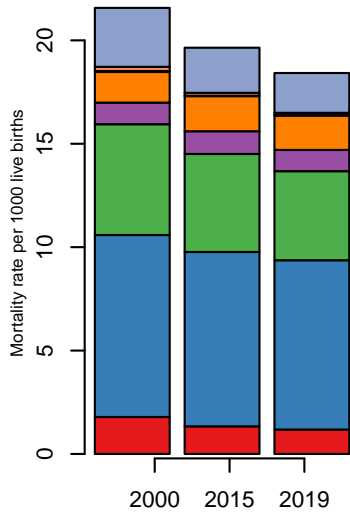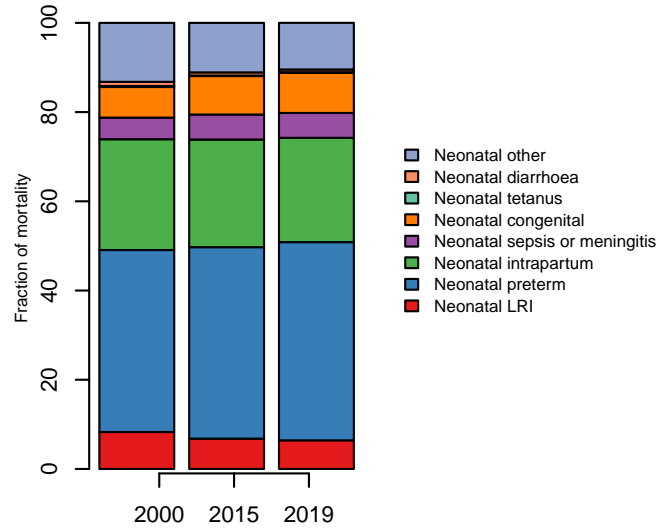

● 2000 – 2015      ● 2015 – 2019 (not on target)      → Deficit to target      ○ 2015 – 2019 (on target)

### Syrian Arab Republic (Under five)

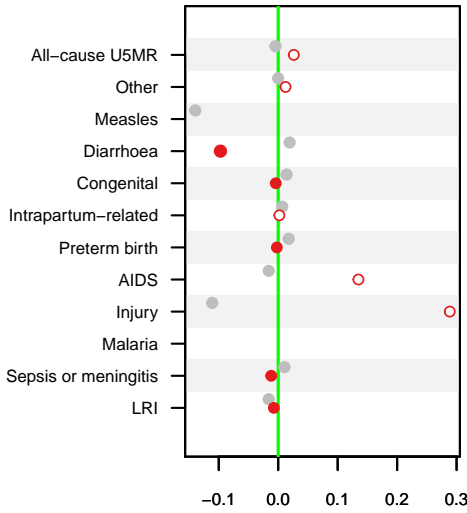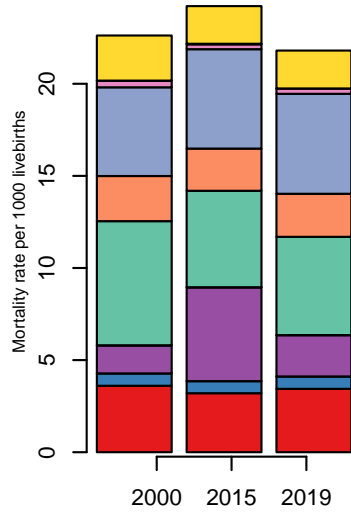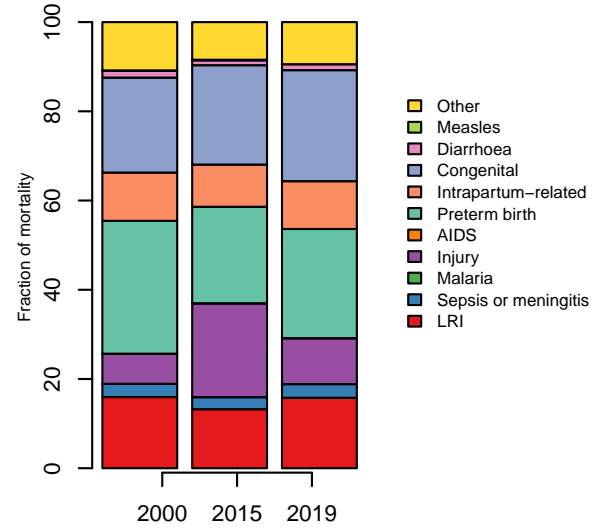

### Syrian Arab Republic (Neonatal)

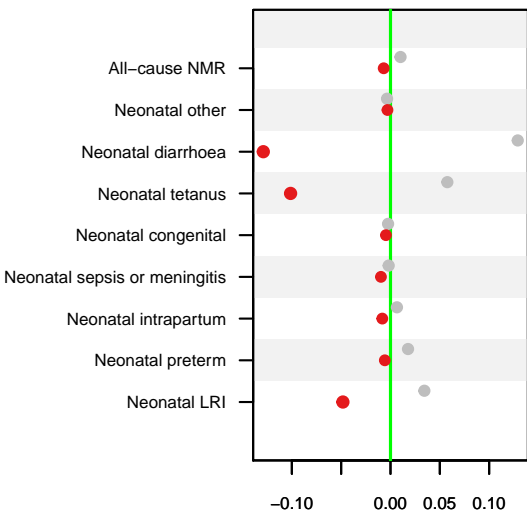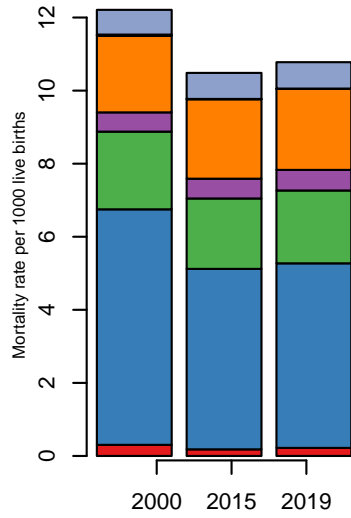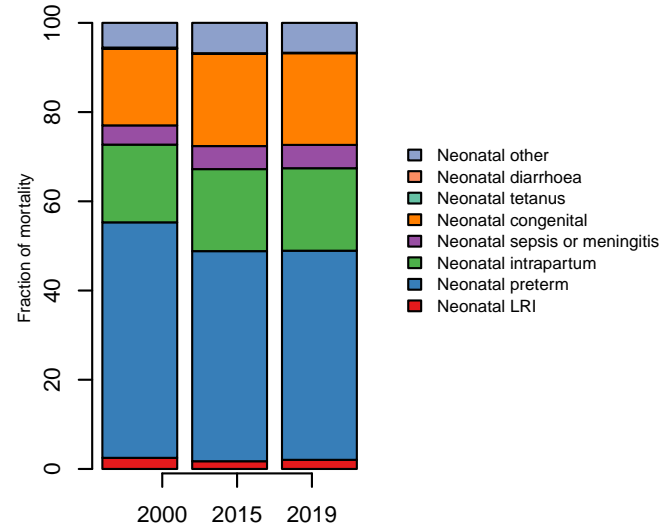

● 2000 – 2015      ● 2015 – 2019 (not on target)      → Deficit to target      ○ 2015 – 2019 (on target)

### Chad (Under five)

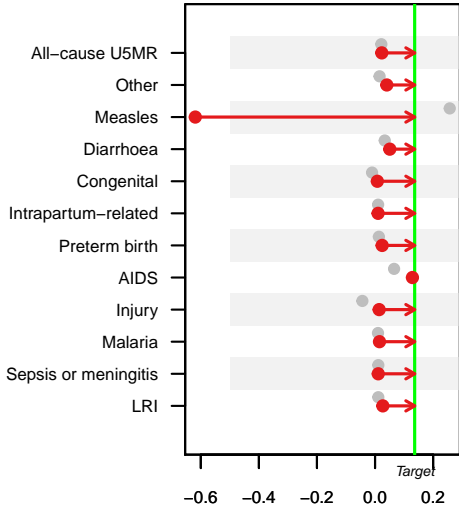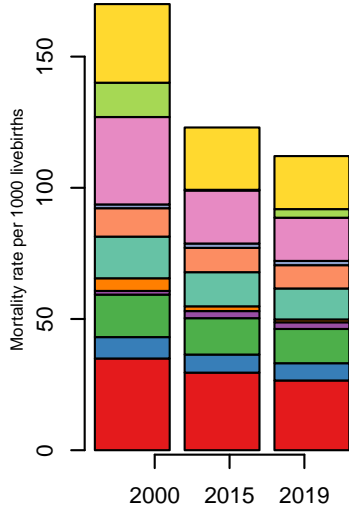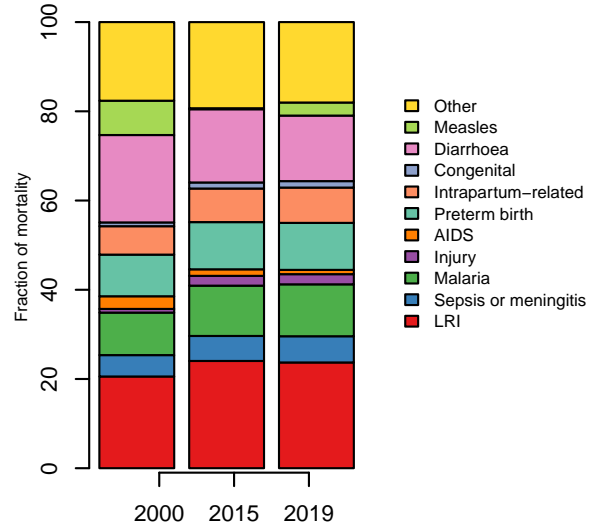

### Chad (Neonatal)

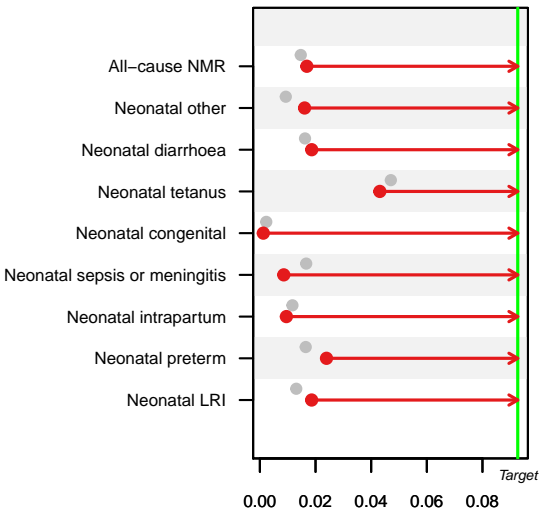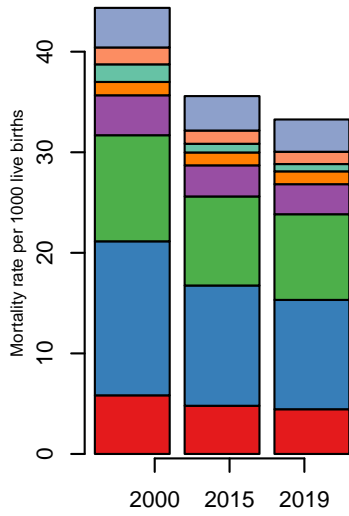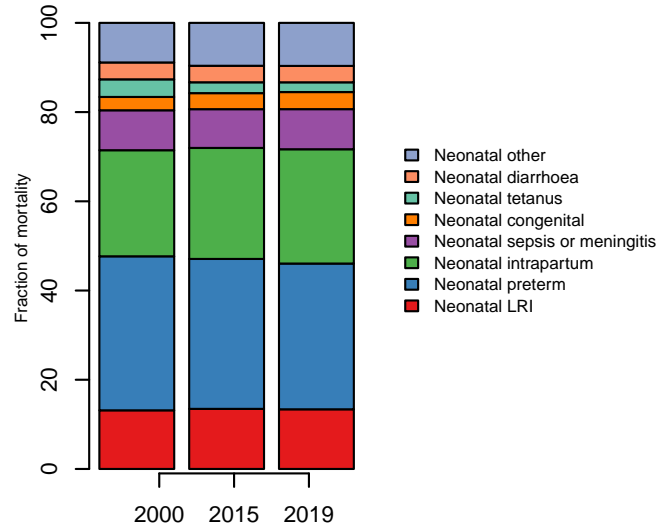

● 2000 – 2015      ● 2015 – 2019 (not on target)      → Deficit to target      ○ 2015 – 2019 (on target)

### Togo (Under five)

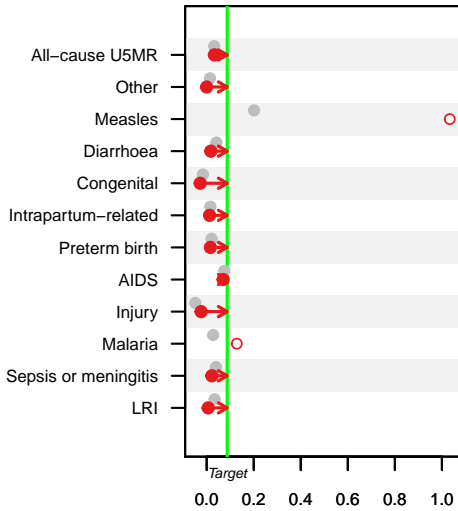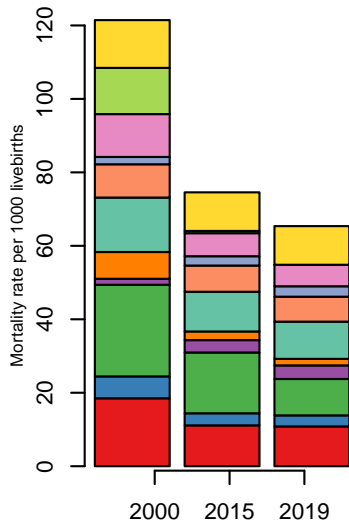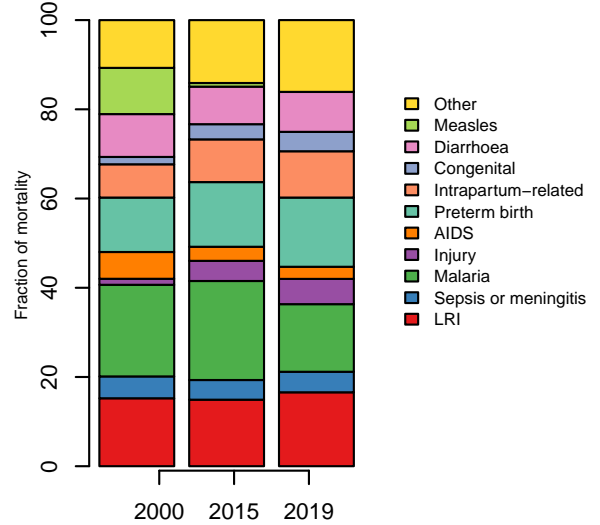

- Other
- Measles
- Diarrhoea
- Congenital
- Intrapartum-related
- Preterm birth
- AIDS
- Injury
- Malaria
- Sepsis or meningitis
- LRI

### Togo (Neonatal)

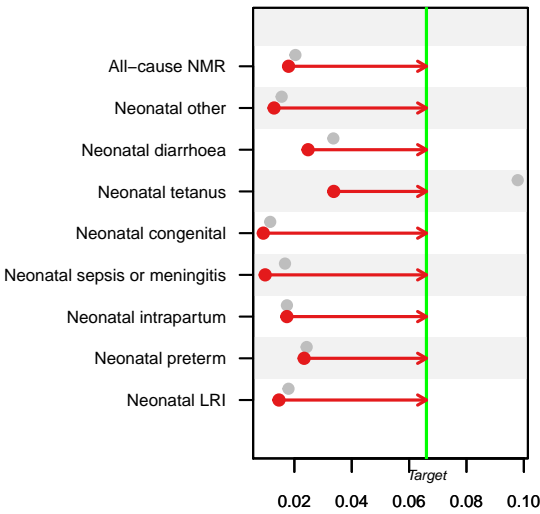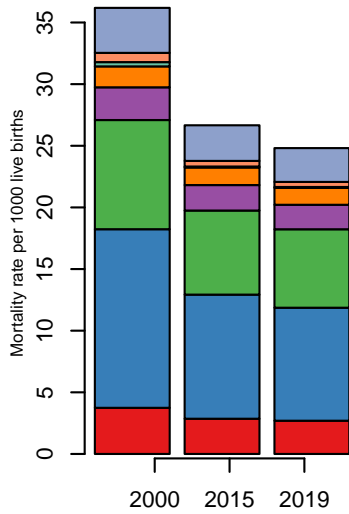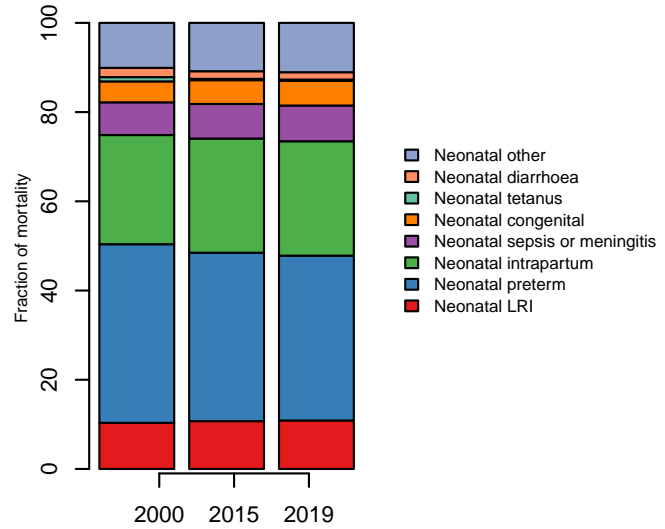

- Neonatal other
- Neonatal diarrhoea
- Neonatal tetanus
- Neonatal congenital
- Neonatal sepsis or meningitis
- Neonatal intrapartum
- Neonatal preterm
- Neonatal LRI

● 2000 – 2015      ● 2015 – 2019 (not on target)      → Deficit to target      ○ 2015 – 2019 (on target)

### Thailand (Under five)

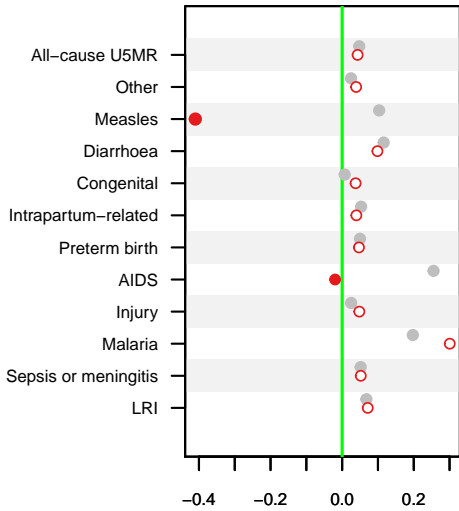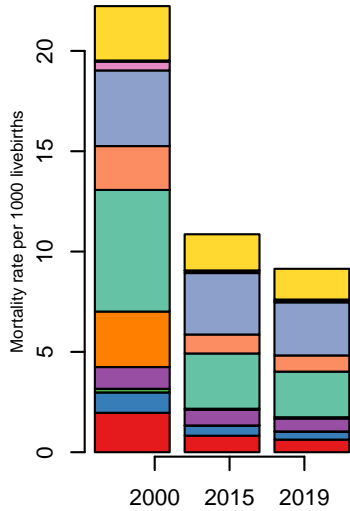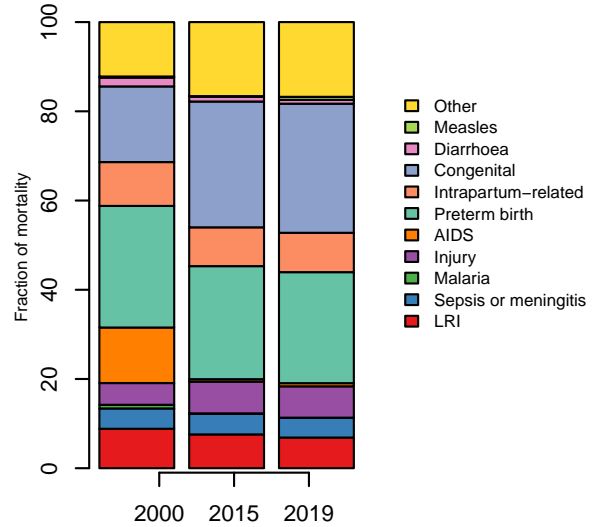

### Thailand (Neonatal)

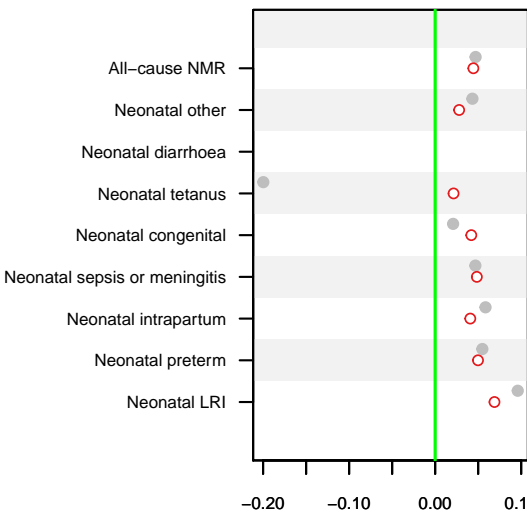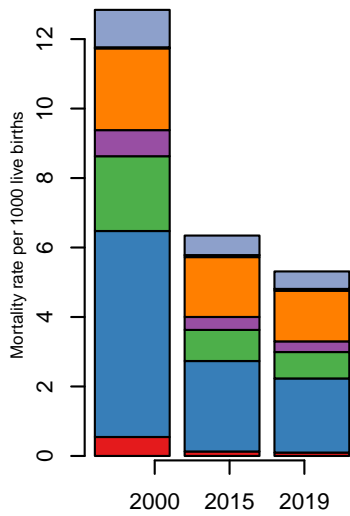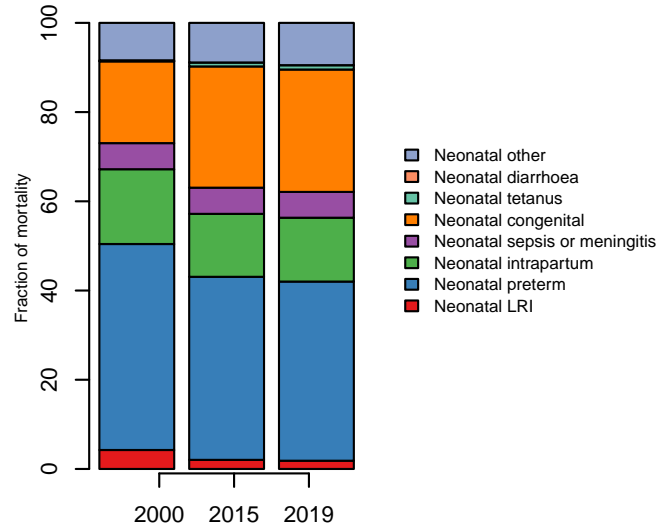

● 2000 – 2015      ● 2015 – 2019 (not on target)      → Deficit to target      ○ 2015 – 2019 (on target)

### Tajikistan (Under five)

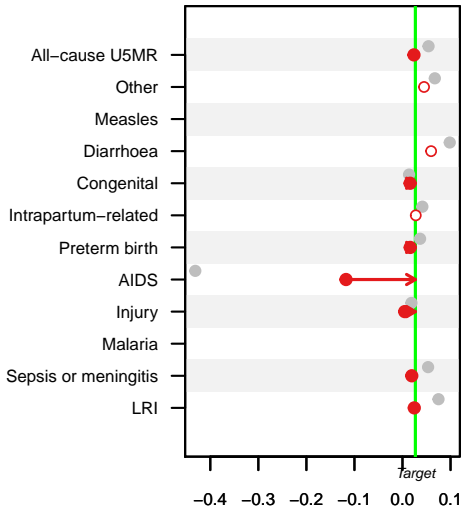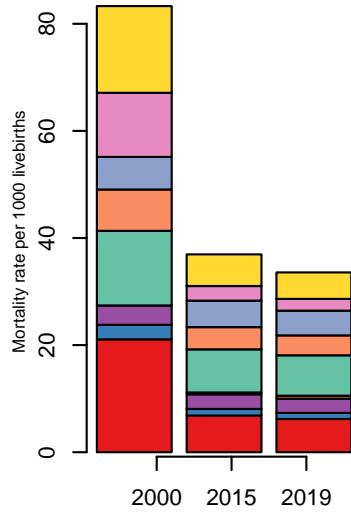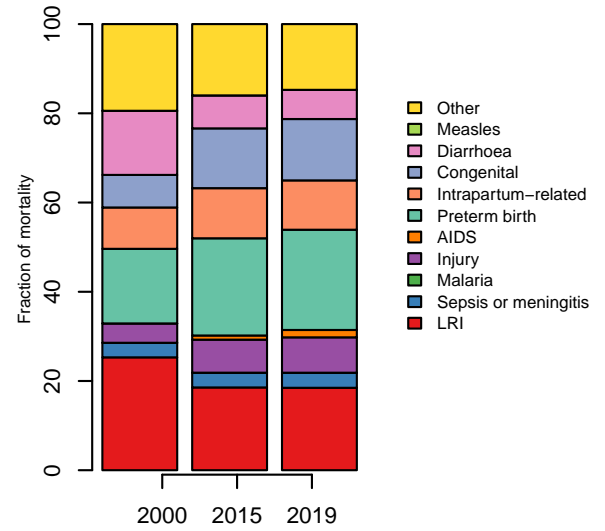

### Tajikistan (Neonatal)

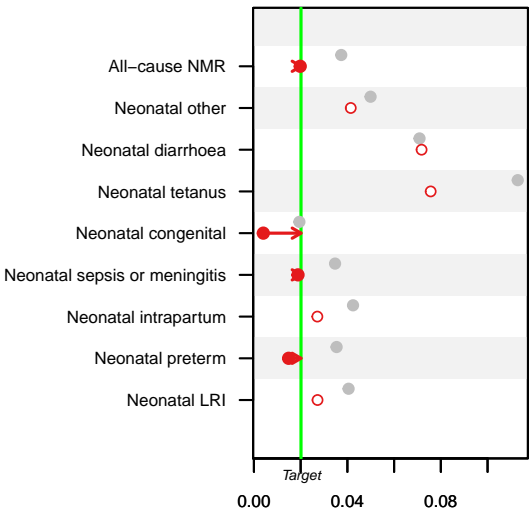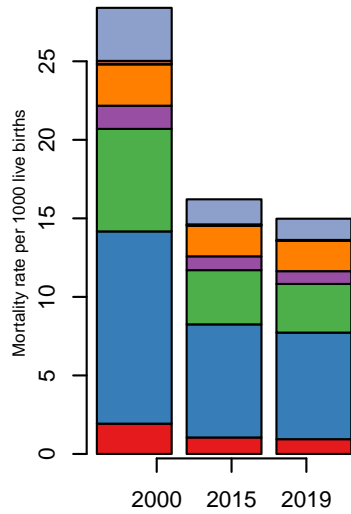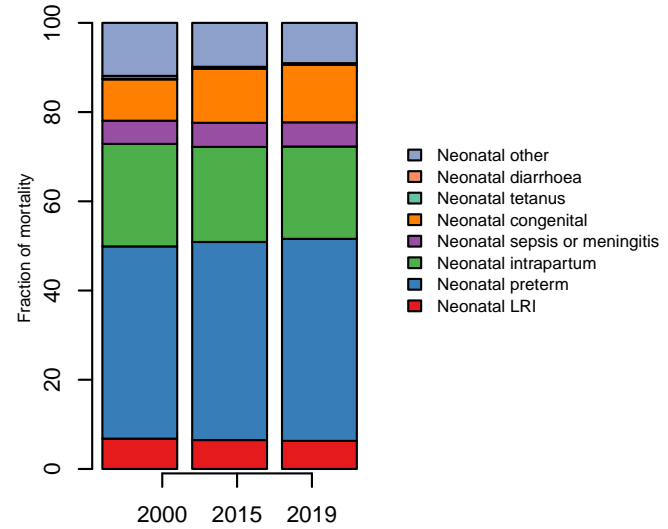

● 2000 – 2015      ● 2015 – 2019 (not on target)      → Deficit to target      ○ 2015 – 2019 (on target)



### Turkmenistan (Under five)

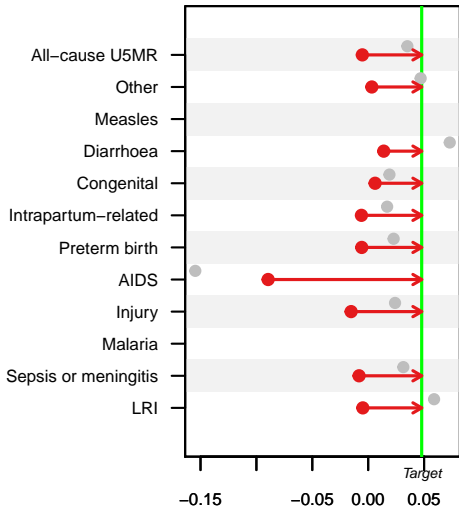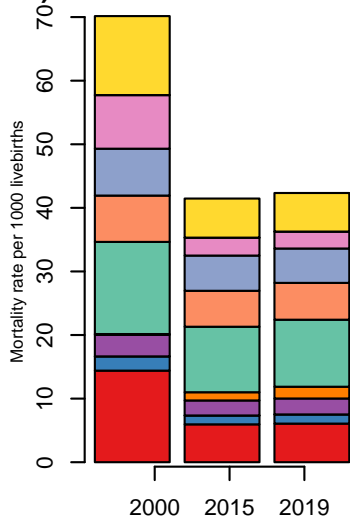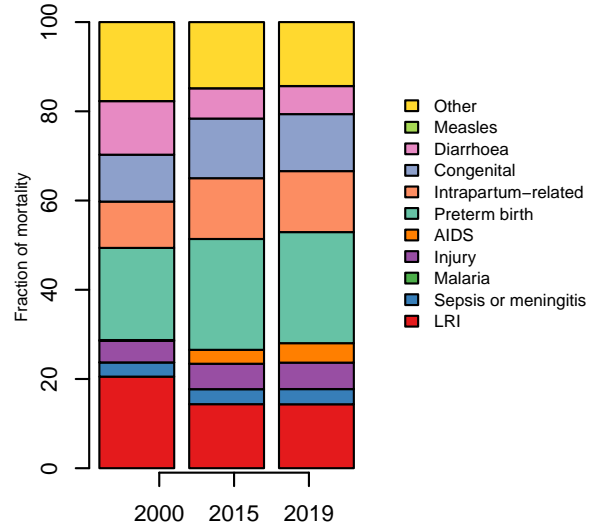

- Other
- Measles
- Diarrhoea
- Congenital
- Intrapartum-related
- Preterm birth
- AIDS
- Injury
- Malaria
- Sepsis or meningitis
- LRI

### Turkmenistan (Neonatal)

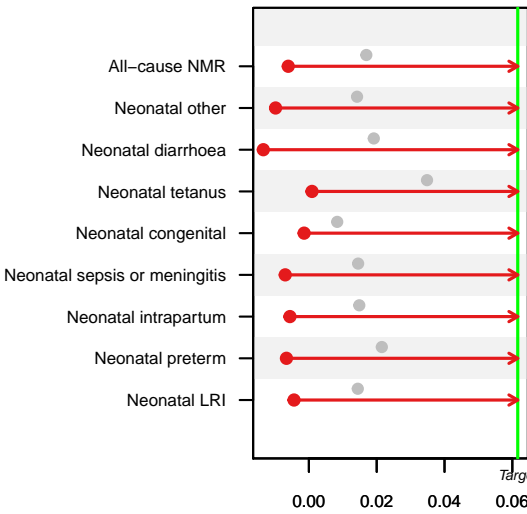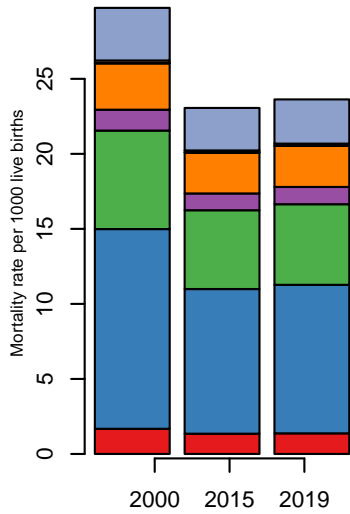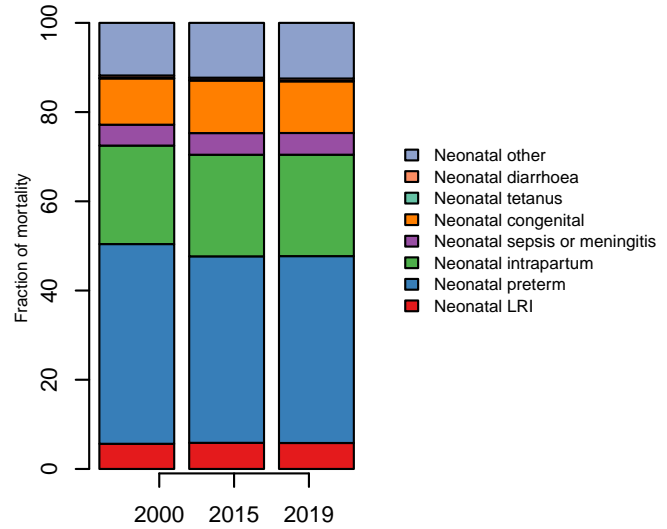

- Neonatal other
- Neonatal diarrhoea
- Neonatal tetanus
- Neonatal congenital
- Neonatal sepsis or meningitis
- Neonatal intrapartum
- Neonatal preterm
- Neonatal LRI

● 2000 – 2015      ● 2015 – 2019 (not on target)      → Deficit to target      ○ 2015 – 2019 (on target)

### Timor-Leste (Under five)

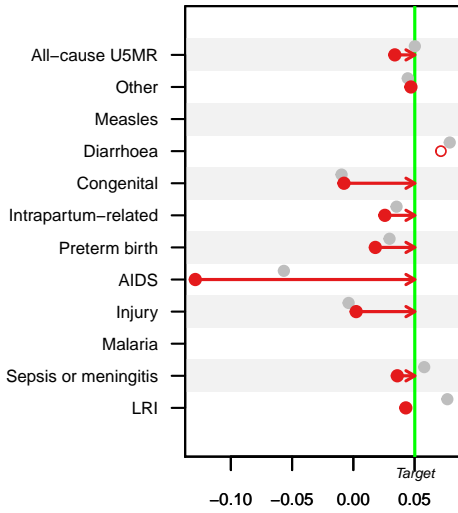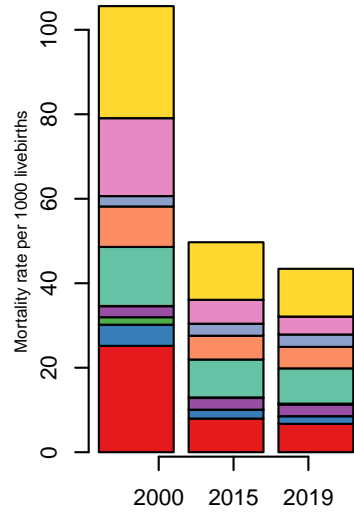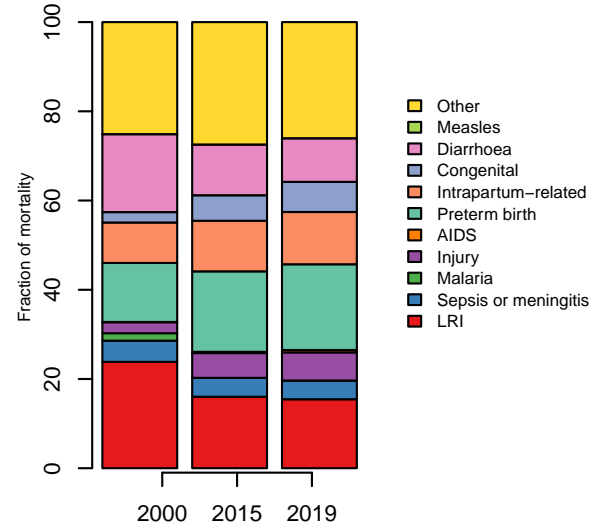

### Timor-Leste (Neonatal)

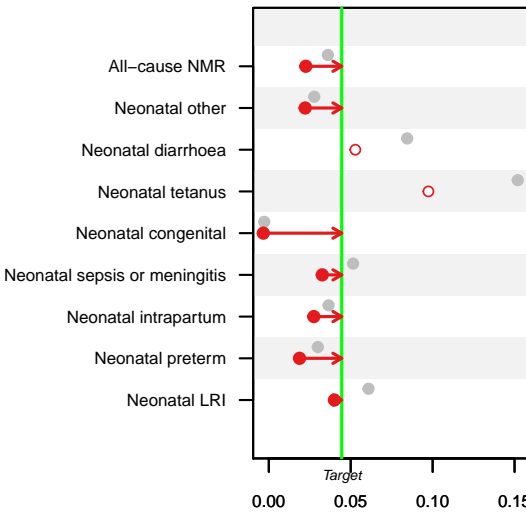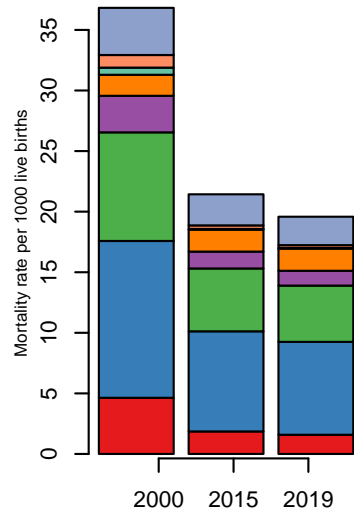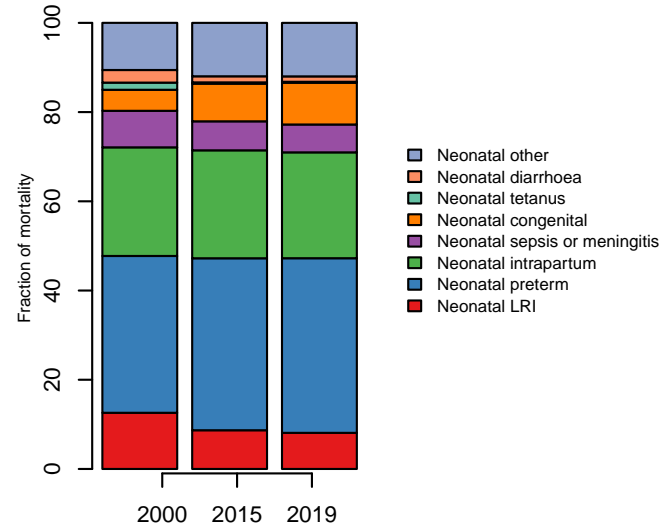

● 2000 – 2015      ● 2015 – 2019 (not on target)      → Deficit to target      ○ 2015 – 2019 (on target)

### Trinidad and Tobago (Under five)

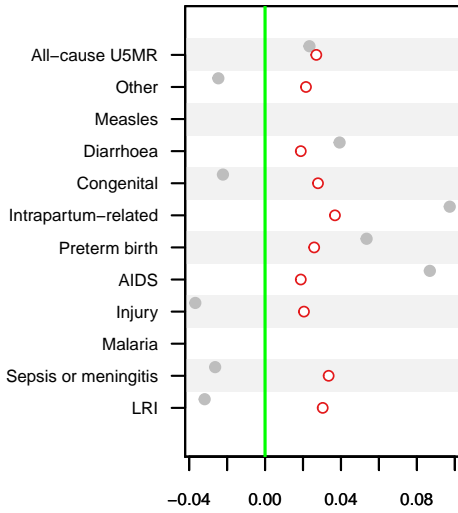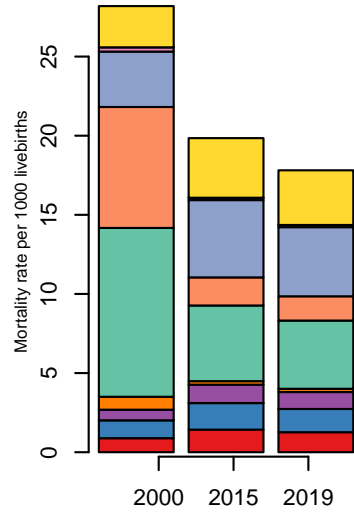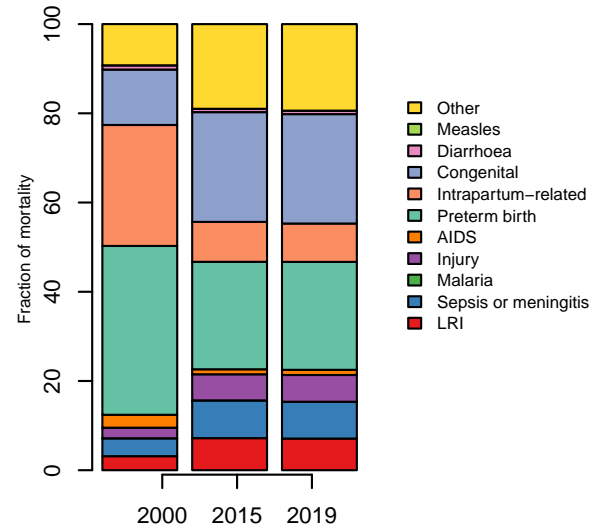

### Trinidad and Tobago (Neonatal)

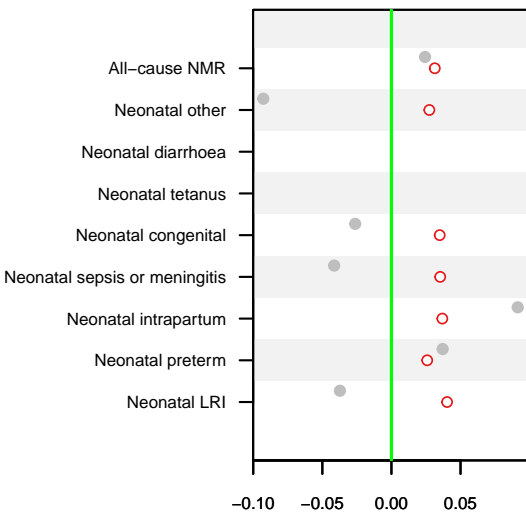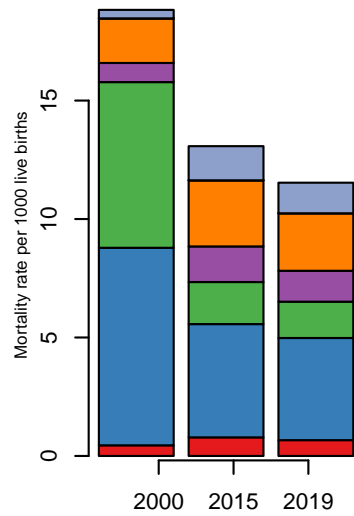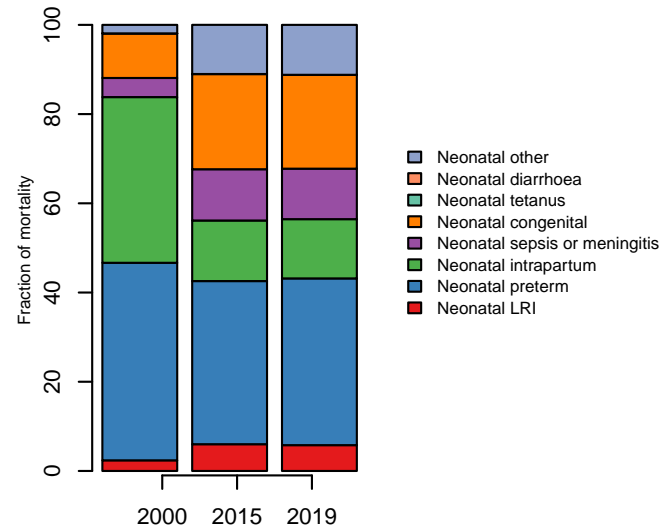

● 2000 – 2015      ● 2015 – 2019 (not on target)      → Deficit to target      ○ 2015 – 2019 (on target)

### Tunisia (Under five)

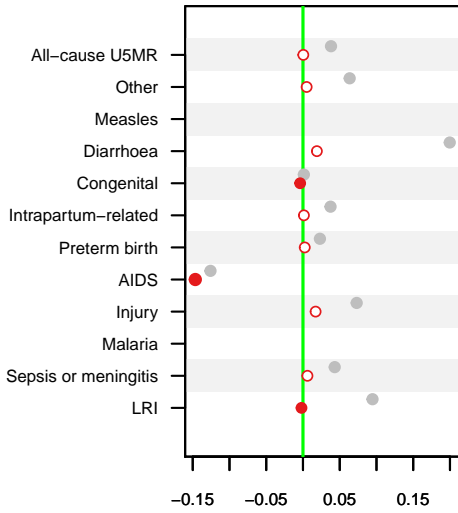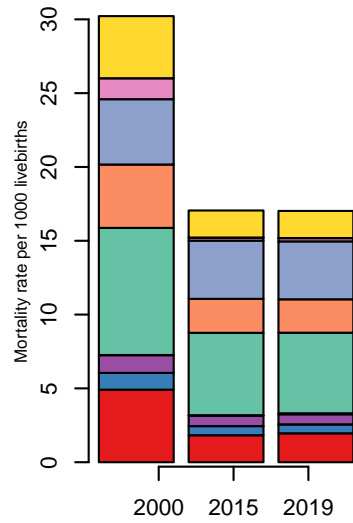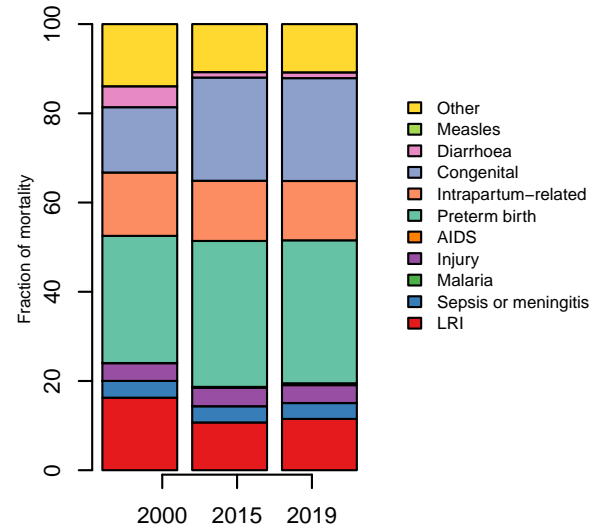

### Tunisia (Neonatal)

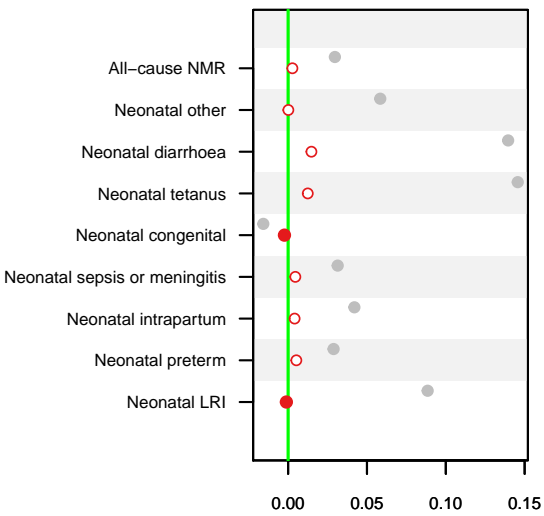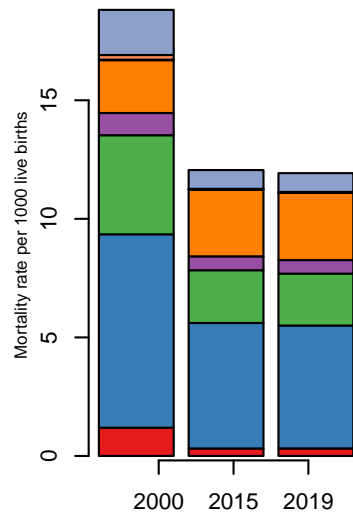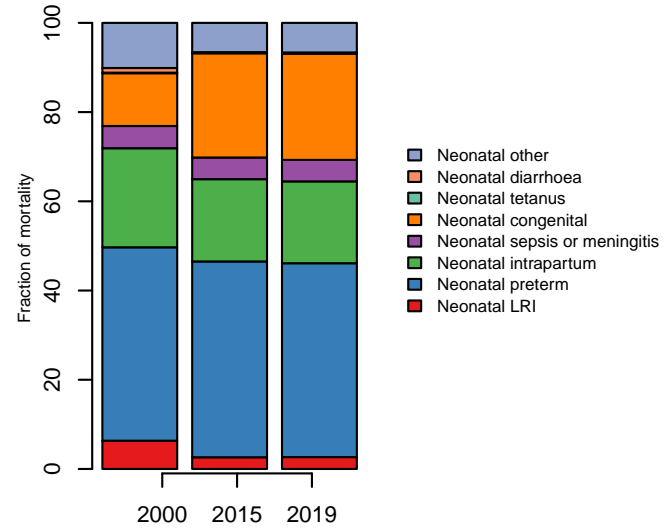

● 2000 – 2015      ● 2015 – 2019 (not on target)      → Deficit to target      ○ 2015 – 2019 (on target)

### Turkey (Under five)

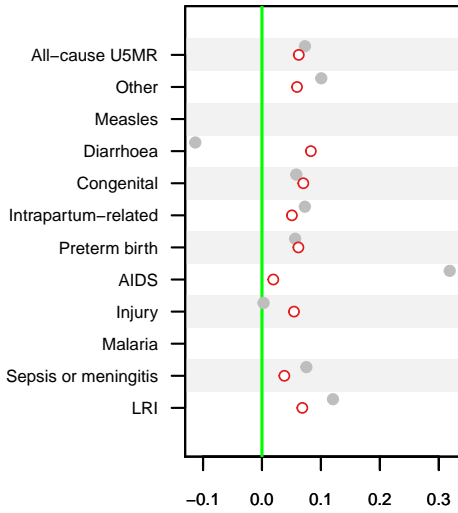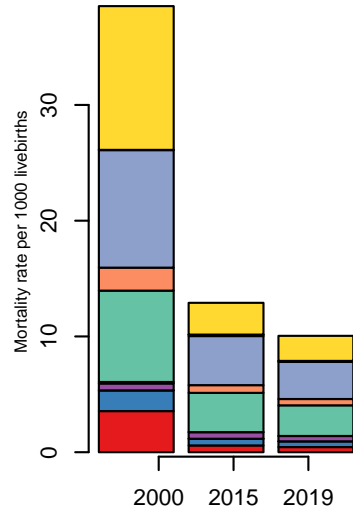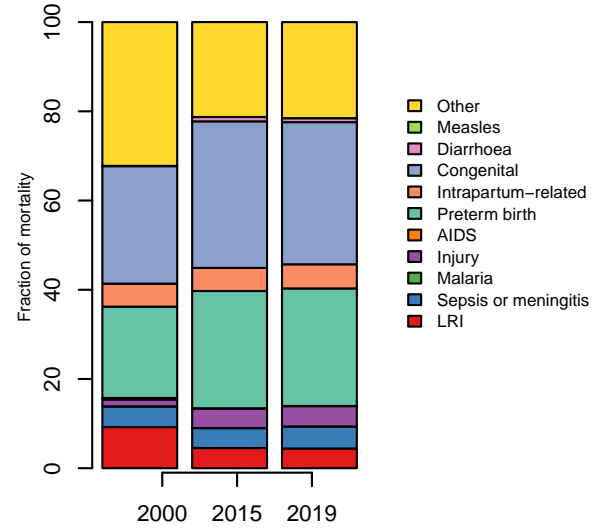

### Turkey (Neonatal)

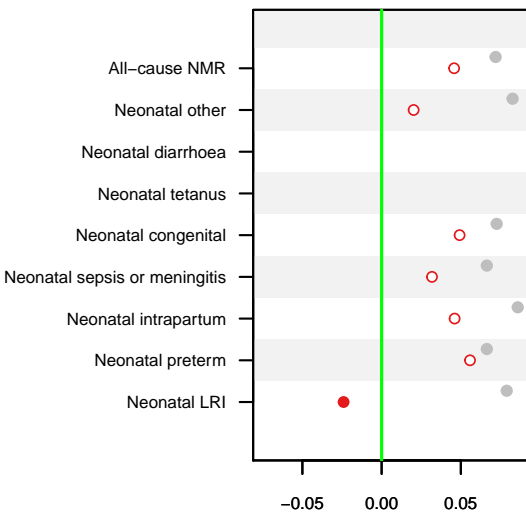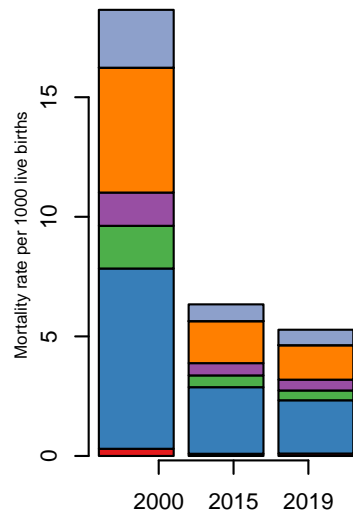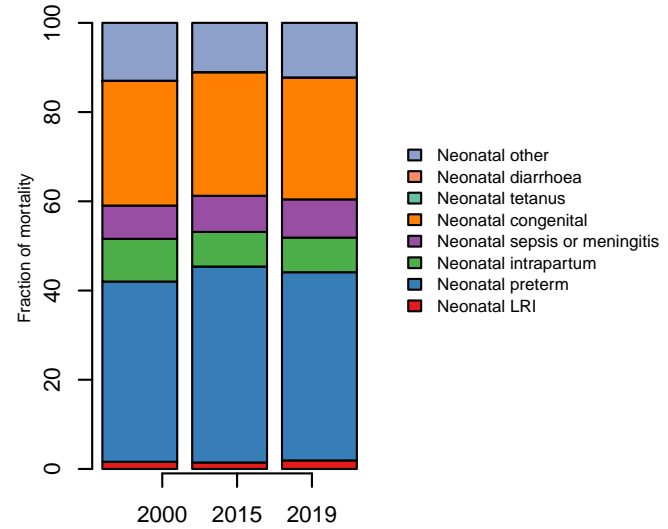

● 2000 – 2015      ● 2015 – 2019 (not on target)      → Deficit to target      ○ 2015 – 2019 (on target)

### United Republic of Tanzania (Under five)

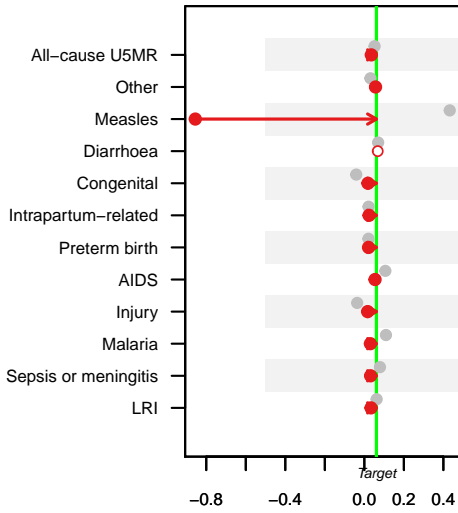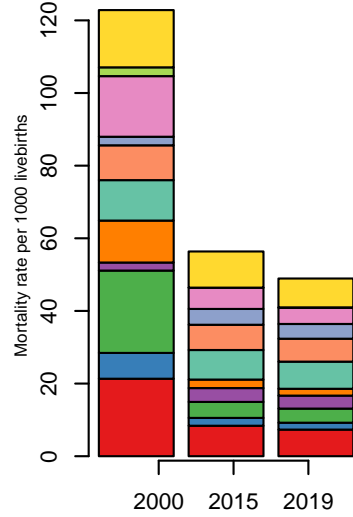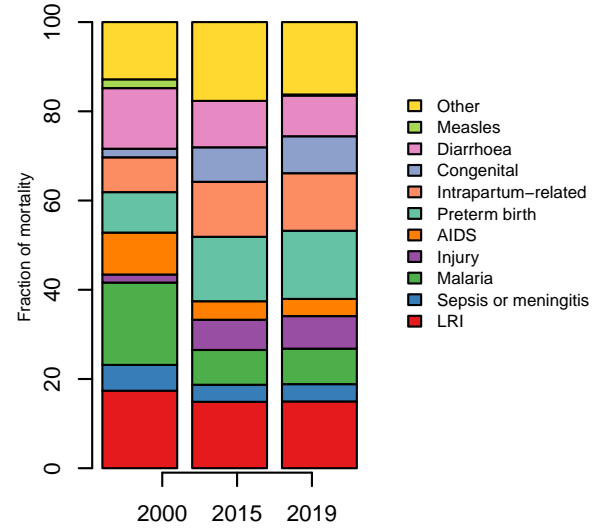

### United Republic of Tanzania (Neonatal)

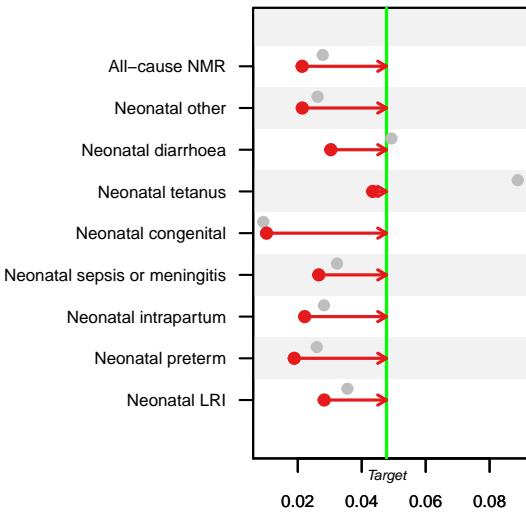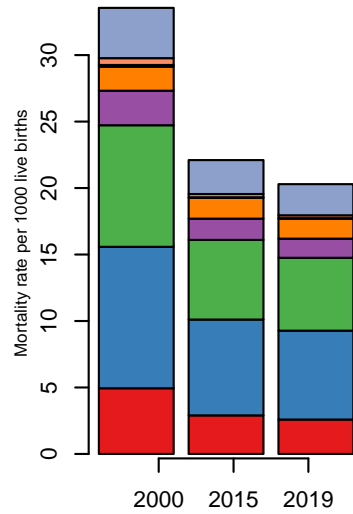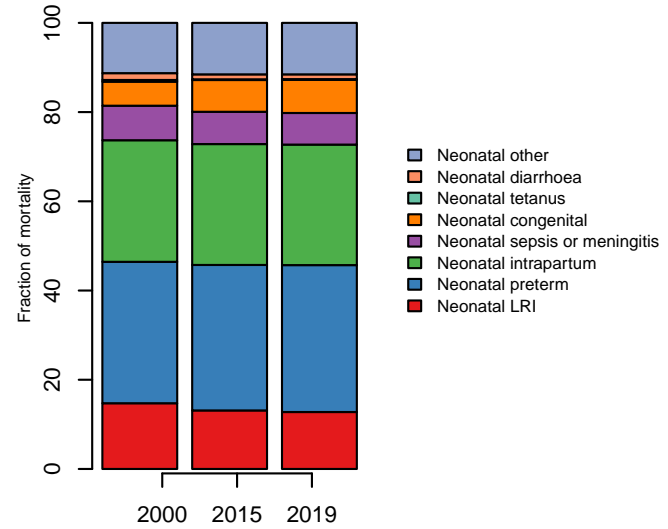

● 2000 – 2015      ● 2015 – 2019 (not on target)      → Deficit to target      ○ 2015 – 2019 (on target)

### Uganda (Under five)

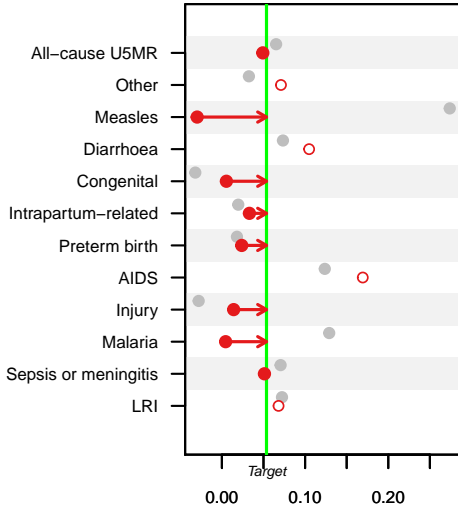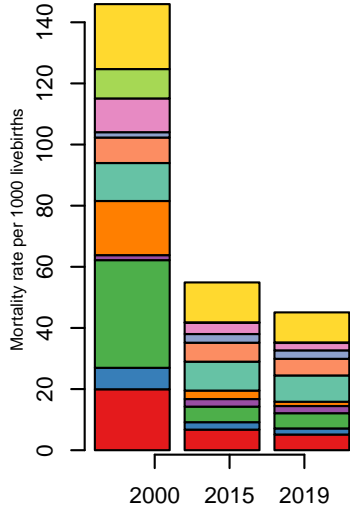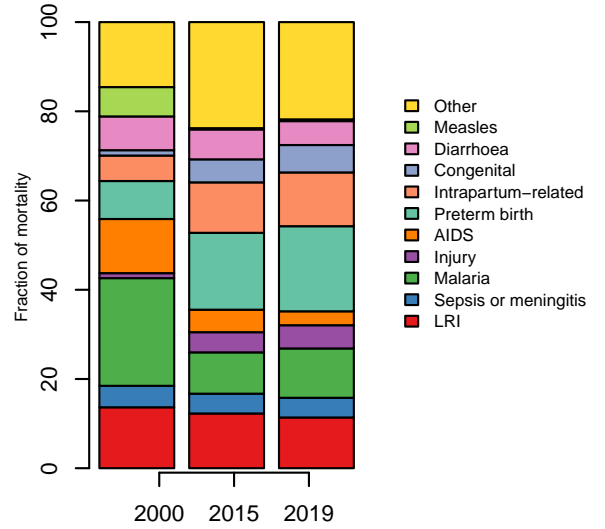

### Uganda (Neonatal)

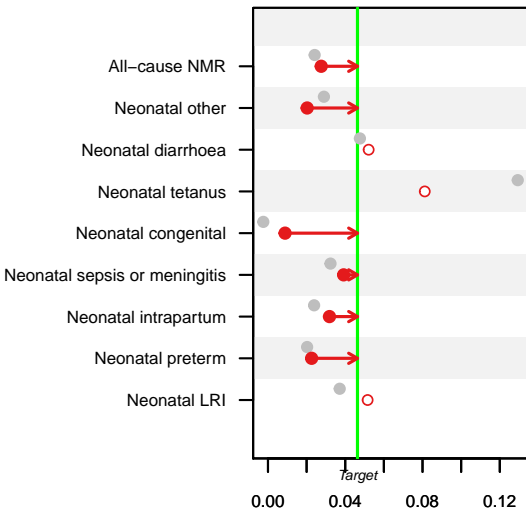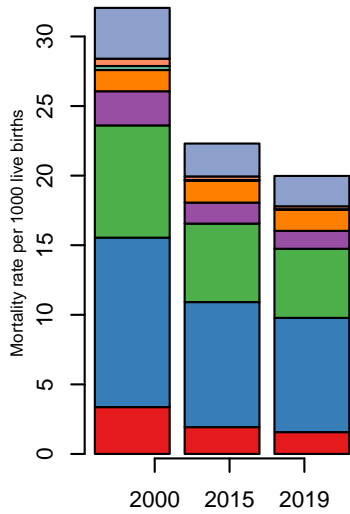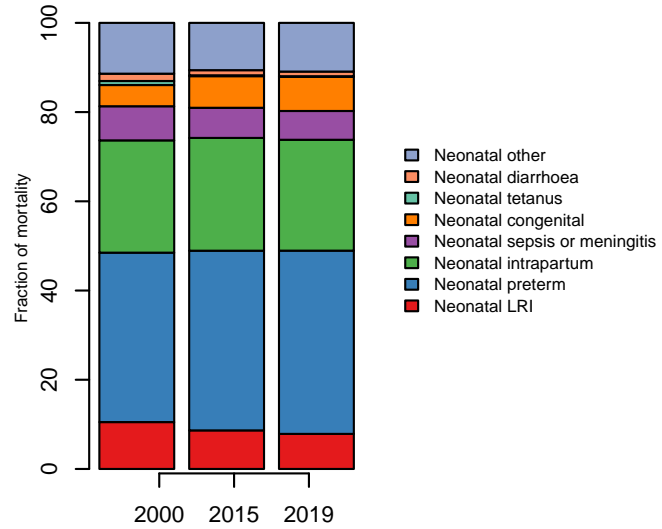

● 2000 – 2015      ● 2015 – 2019 (not on target)      → Deficit to target      ○ 2015 – 2019 (on target)

### Ukraine (Under five)

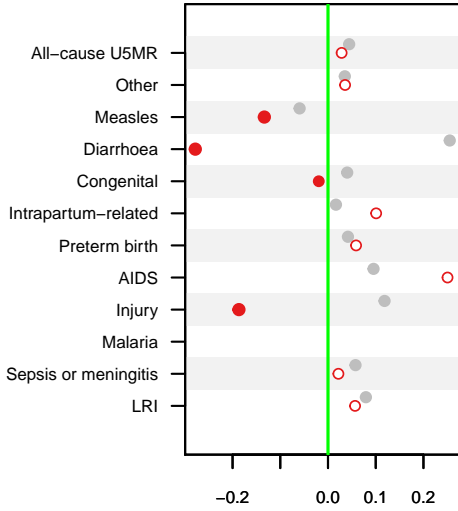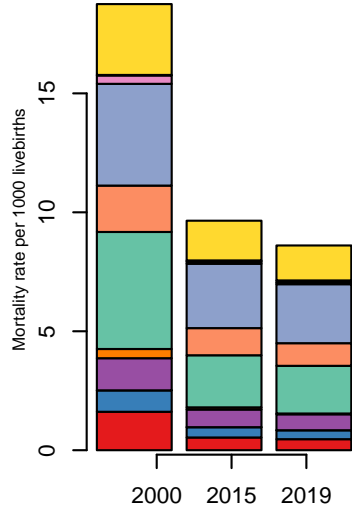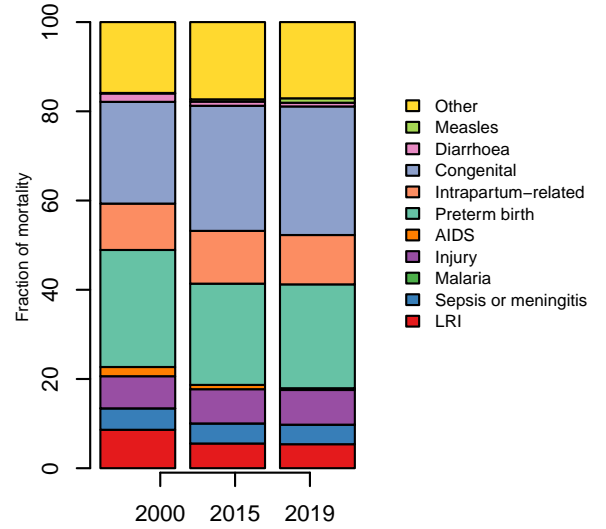

### Ukraine (Neonatal)

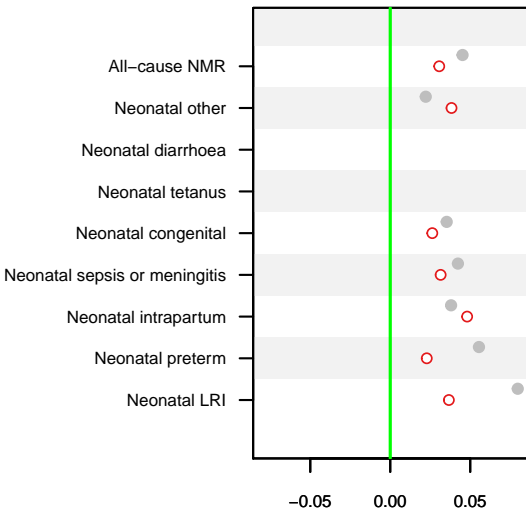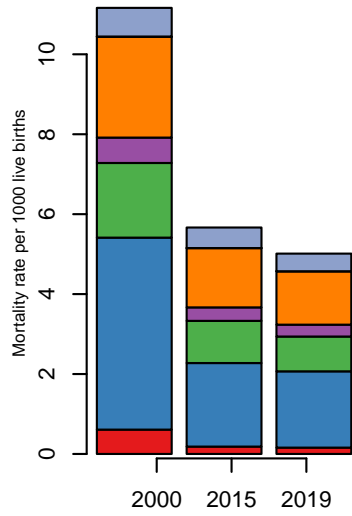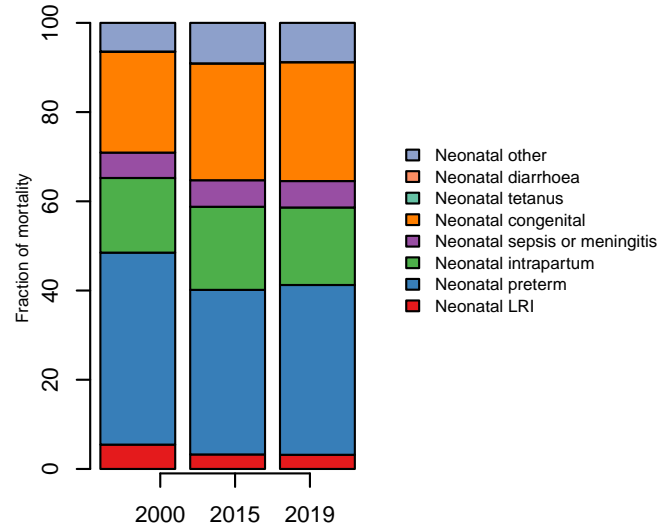

● 2000 – 2015      ● 2015 – 2019 (not on target)      → Deficit to target      ○ 2015 – 2019 (on target)



### Uruguay (Under five)

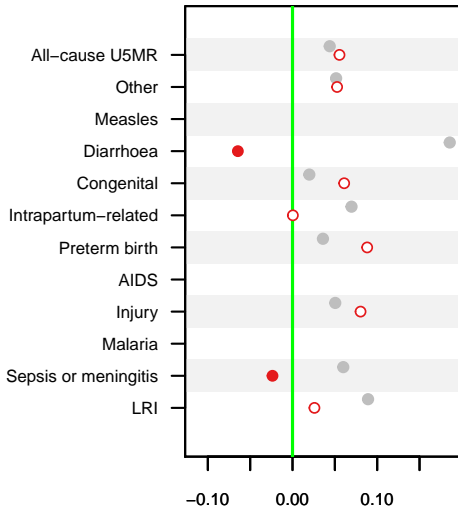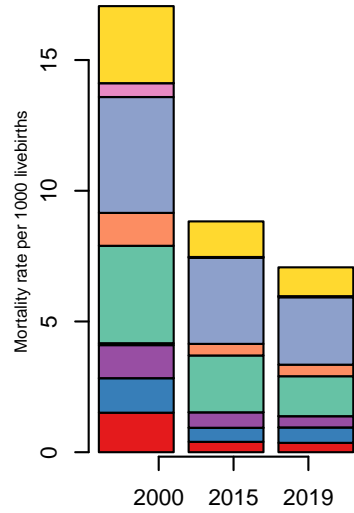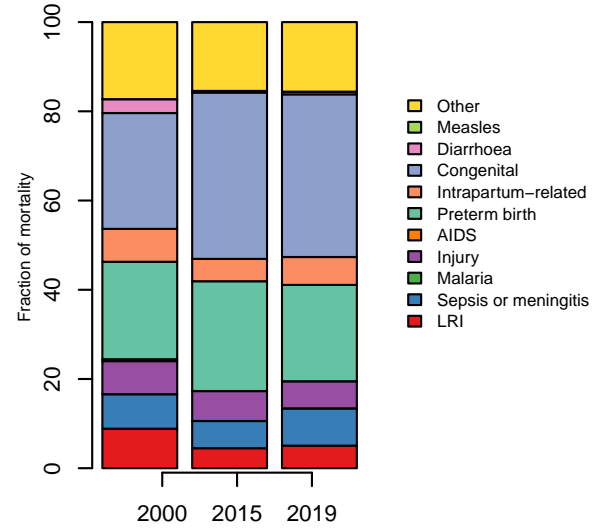

### Uruguay (Neonatal)

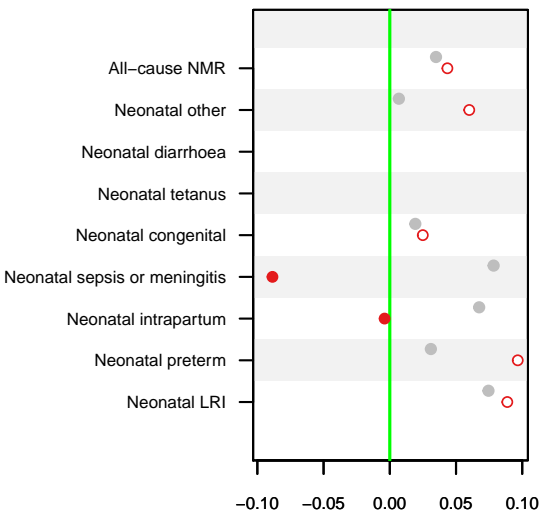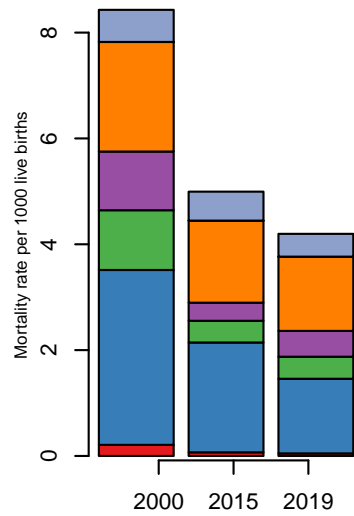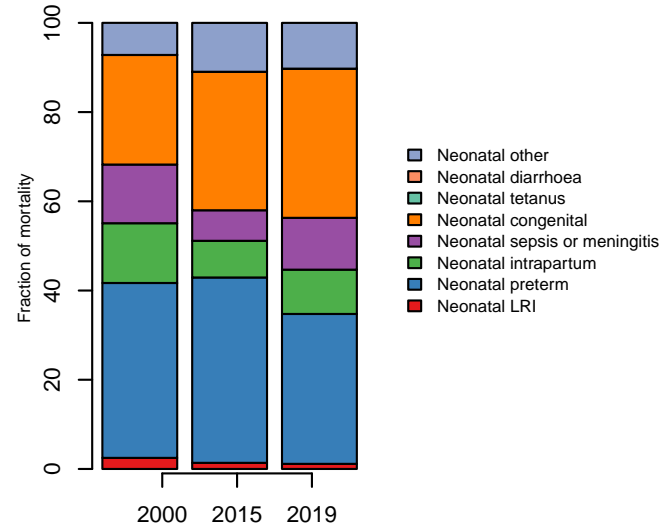

● 2000 – 2015      ● 2015 – 2019 (not on target)      → Deficit to target      ○ 2015 – 2019 (on target)

### United States of America (Under five)

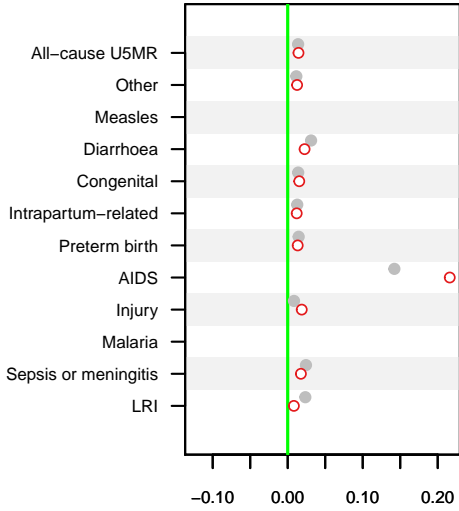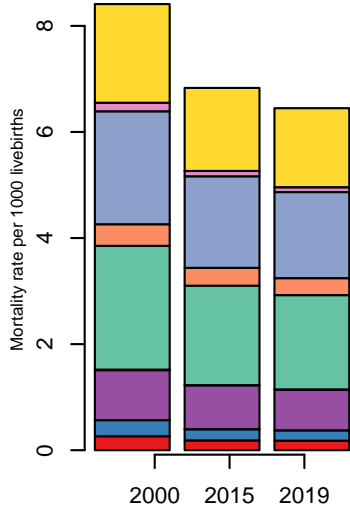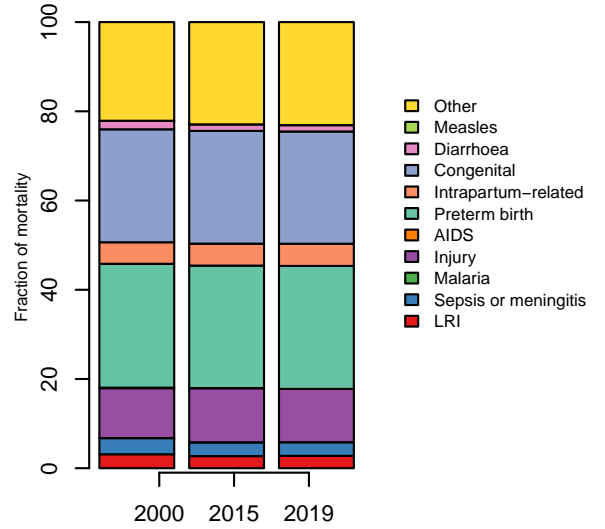

### United States of America (Neonatal)

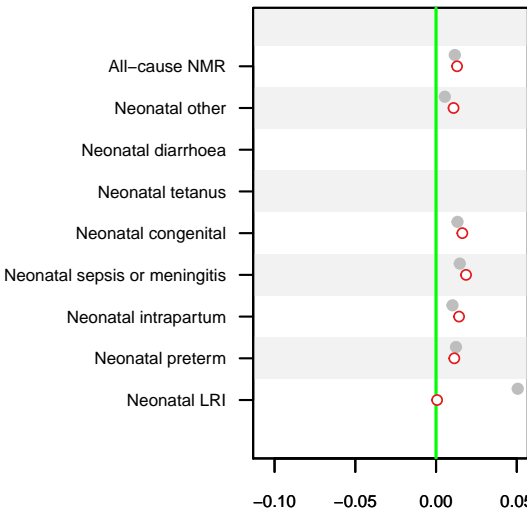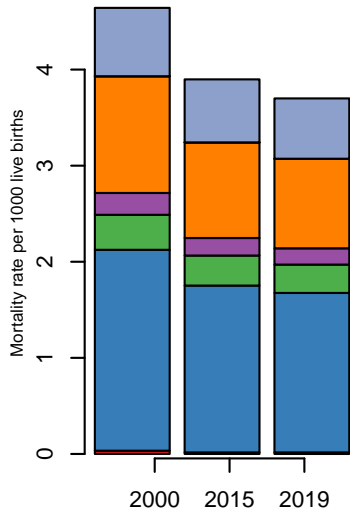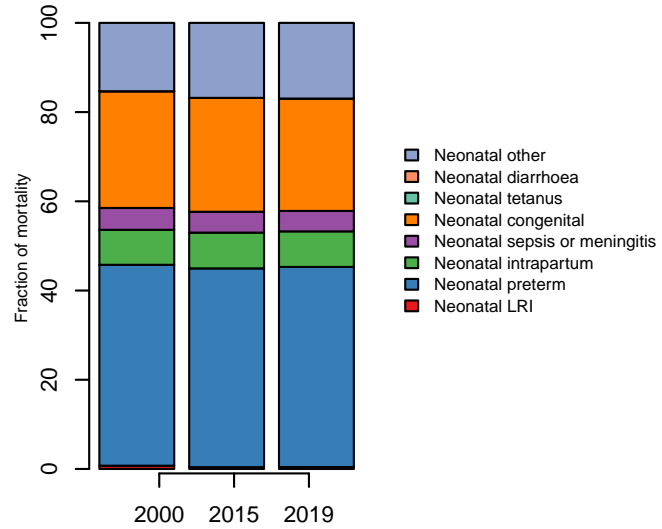

● 2000 – 2015      ● 2015 – 2019 (not on target)      → Deficit to target      ○ 2015 – 2019 (on target)

### Uzbekistan (Under five)

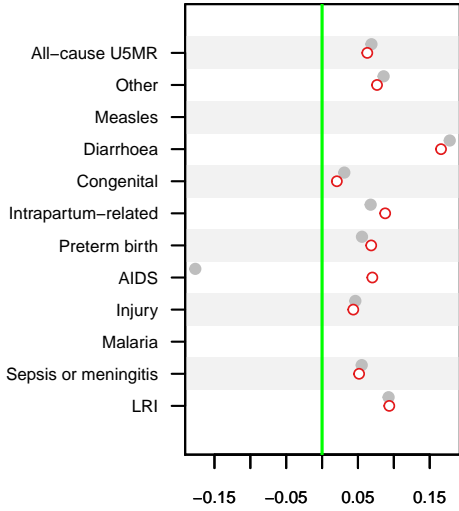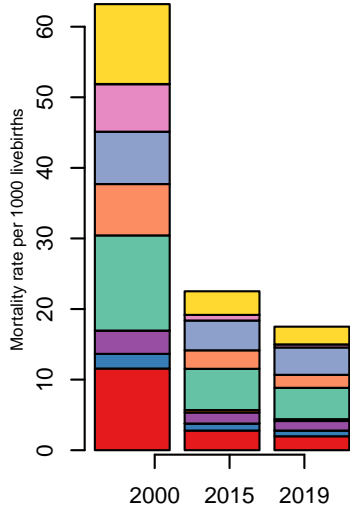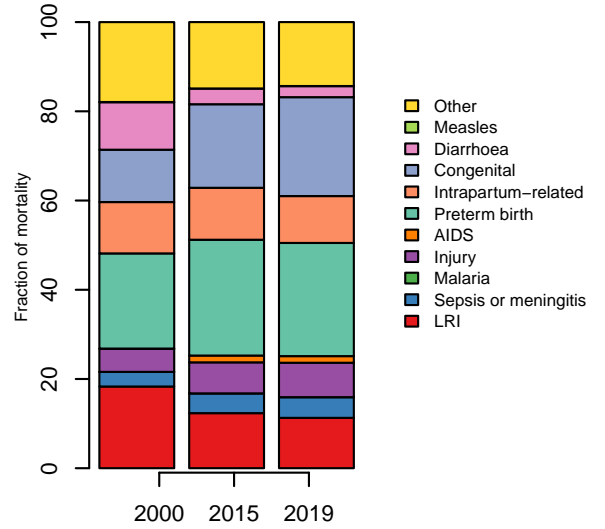

### Uzbekistan (Neonatal)

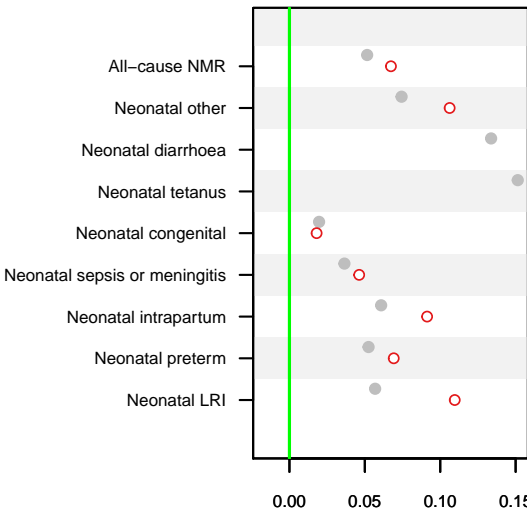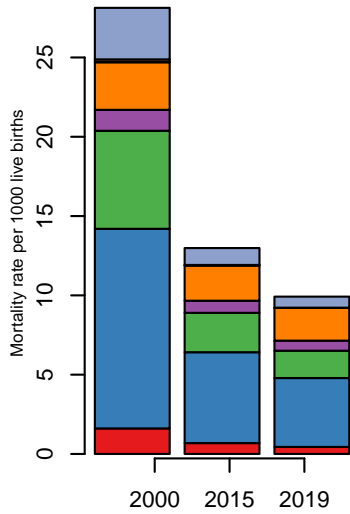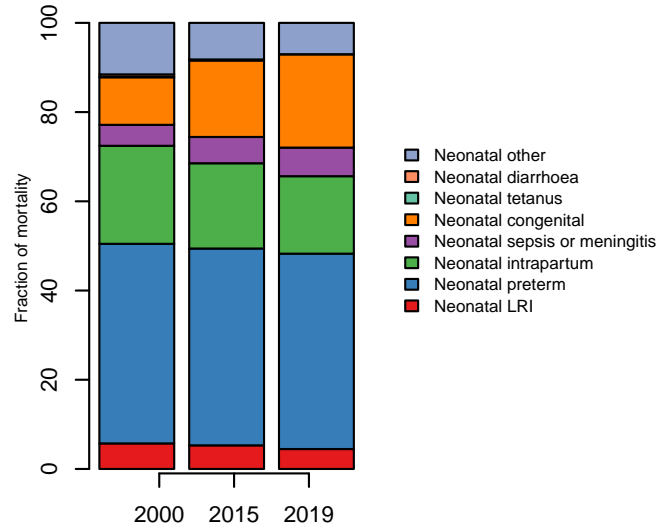

● 2000 – 2015      ● 2015 – 2019 (not on target)      → Deficit to target      ○ 2015 – 2019 (on target)

### Venezuela (Bolivarian Republic of) (Under five)

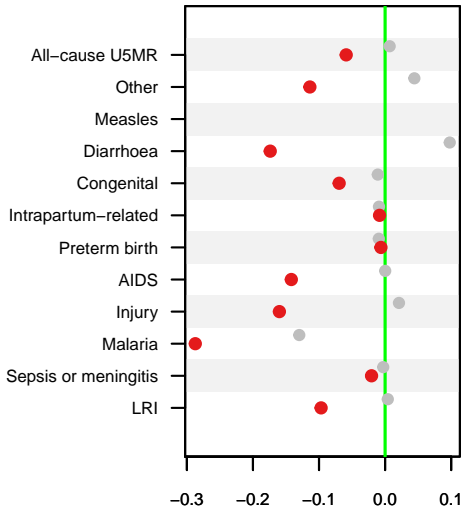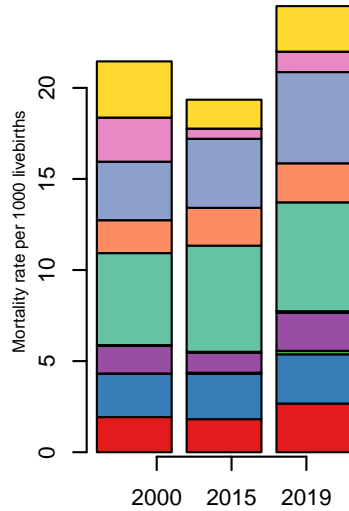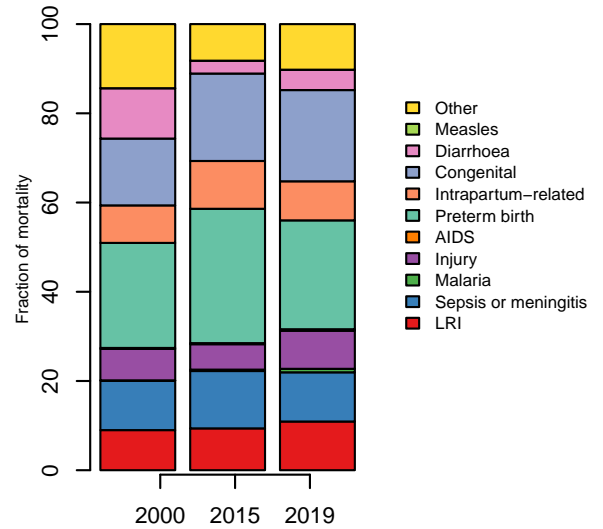

### Venezuela (Bolivarian Republic of) (Neonatal)

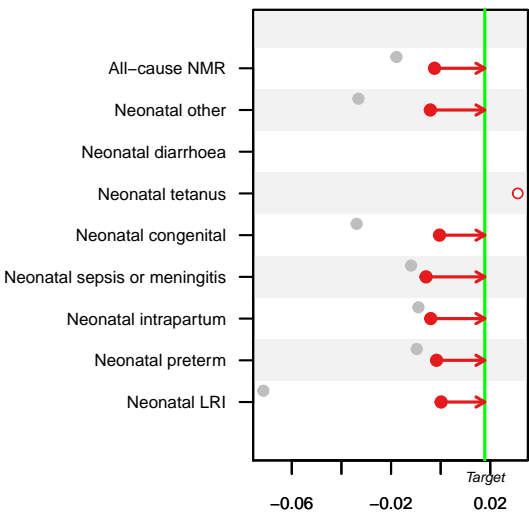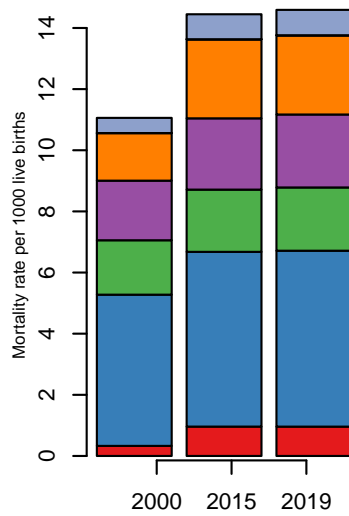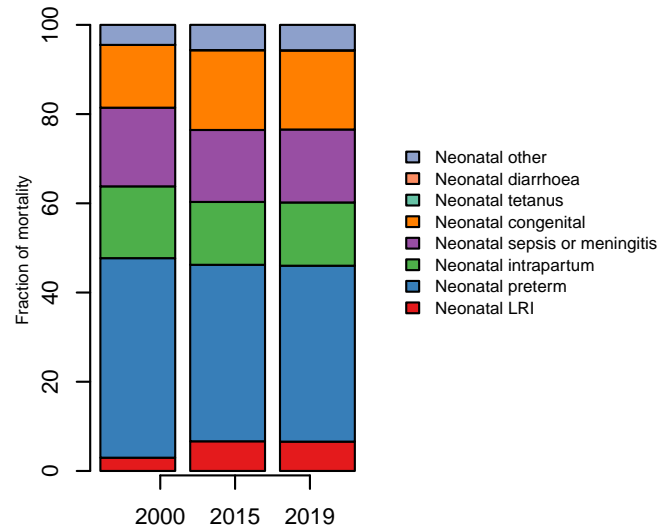

● 2000 – 2015      ● 2015 – 2019 (not on target)      → Deficit to target      ○ 2015 – 2019 (on target)

### Viet Nam (Under five)

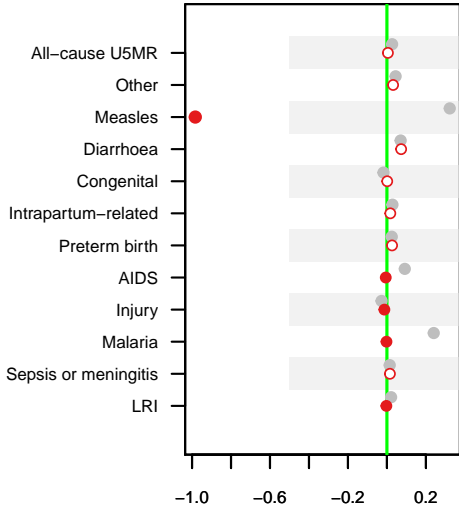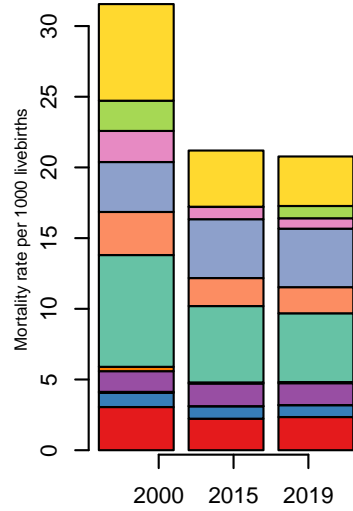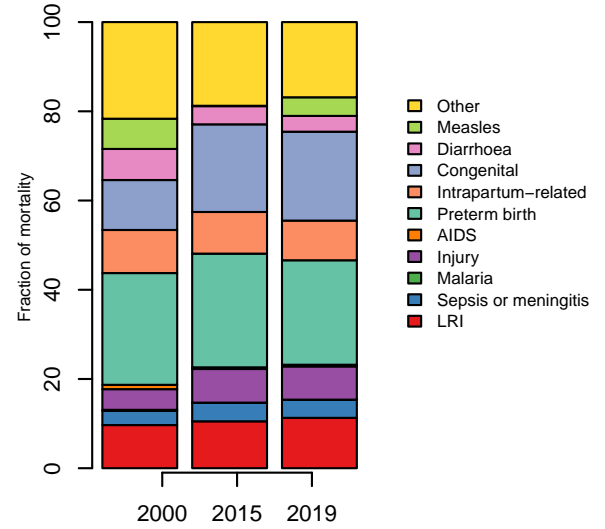

### Viet Nam (Neonatal)

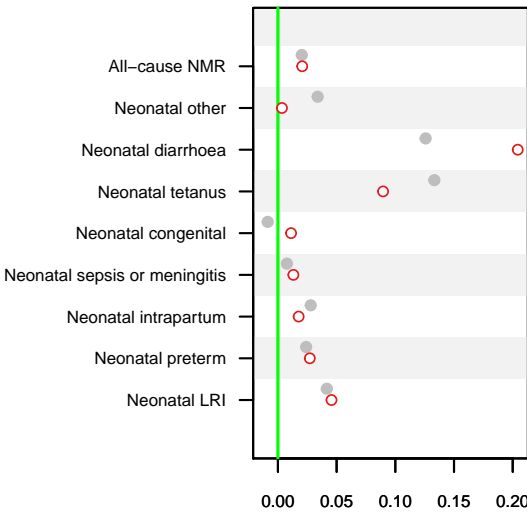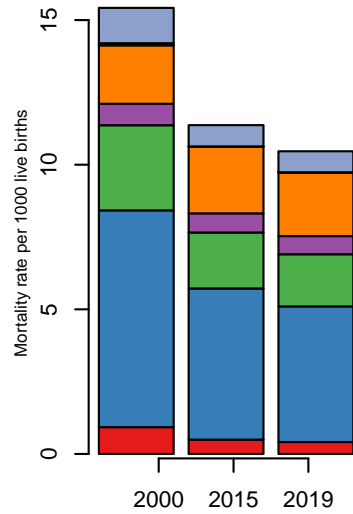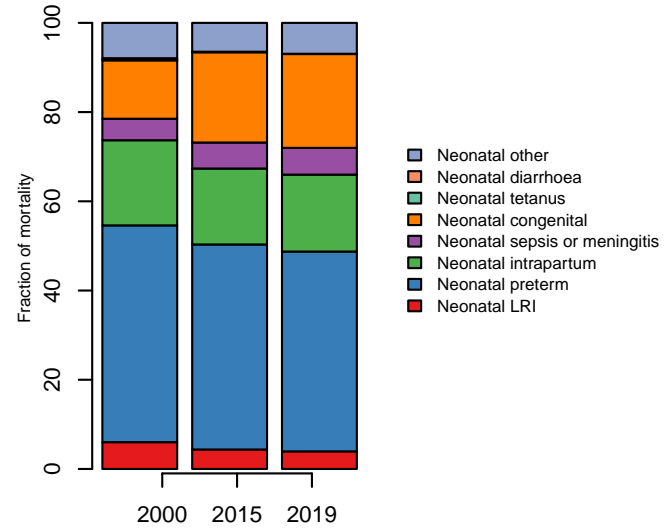

● 2000 - 2015      ● 2015 - 2019 (not on target)      → Deficit to target      ○ 2015 - 2019 (on target)

### Vanuatu (Under five)

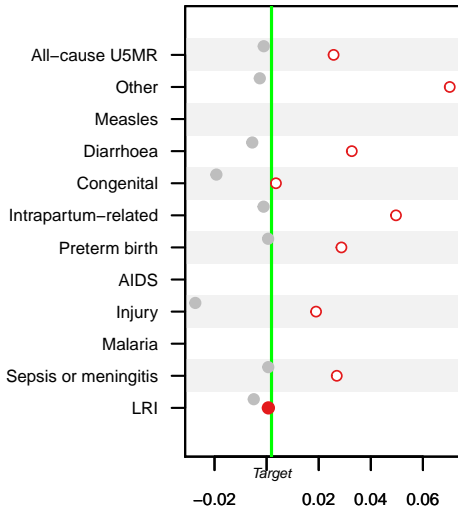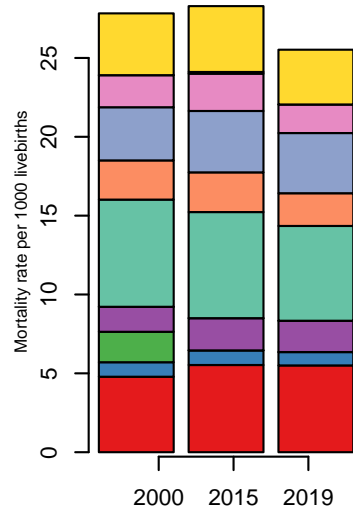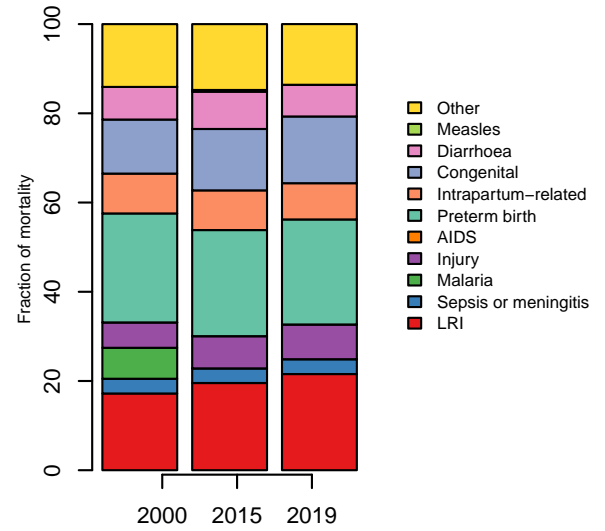

### Vanuatu (Neonatal)

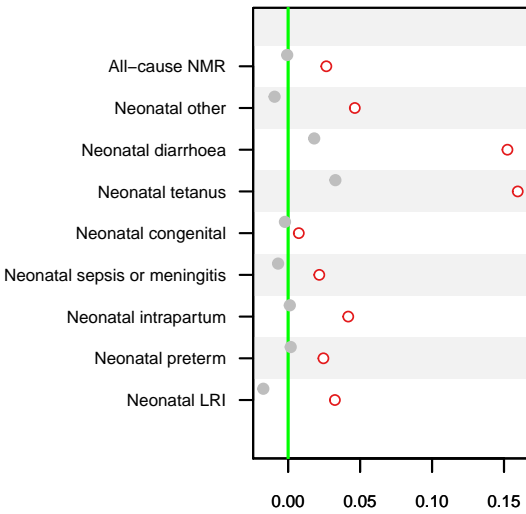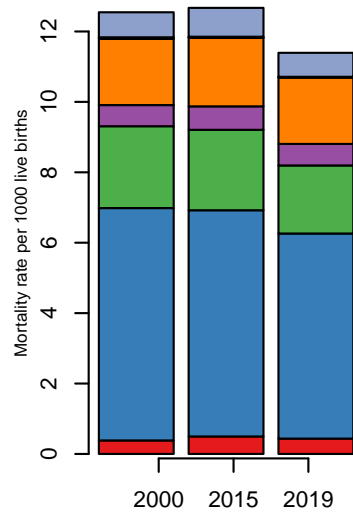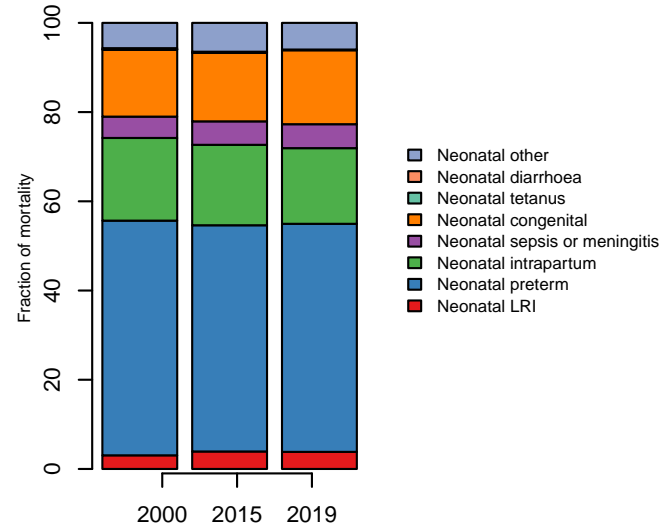

● 2000 – 2015      ● 2015 – 2019 (not on target)      → Deficit to target      ○ 2015 – 2019 (on target)

### Samoa (Under five)

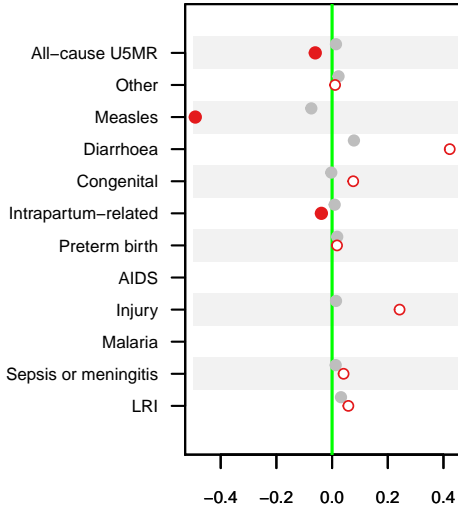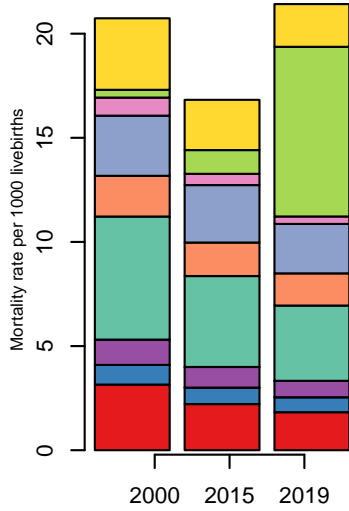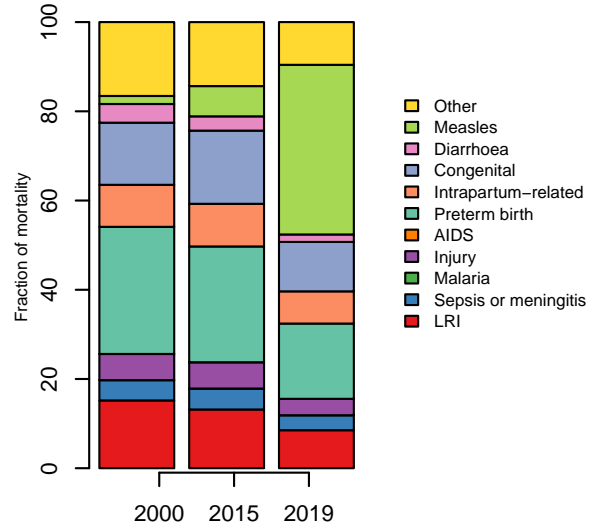

### Samoa (Neonatal)

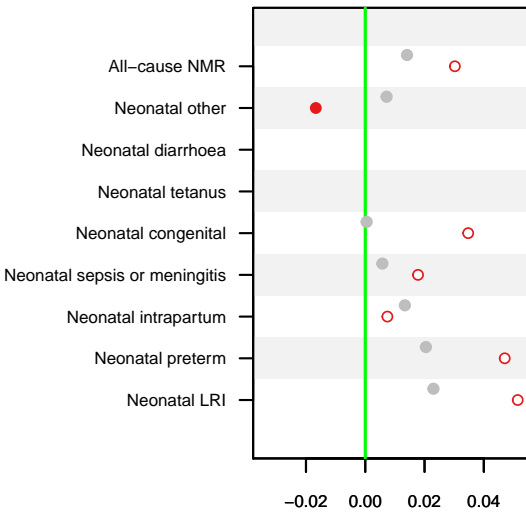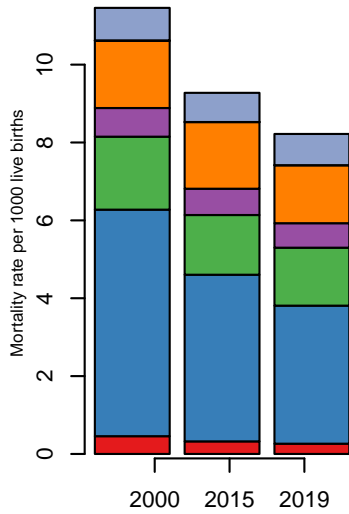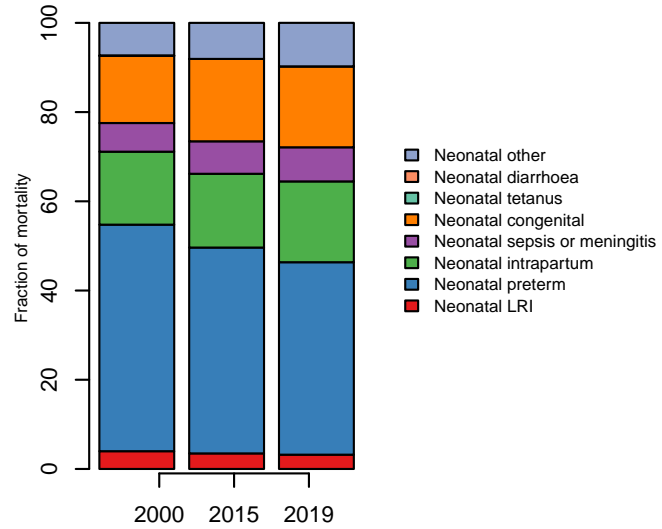

● 2000 – 2015      ● 2015 – 2019 (not on target)      → Deficit to target      ○ 2015 – 2019 (on target)

### Yemen (Under five)

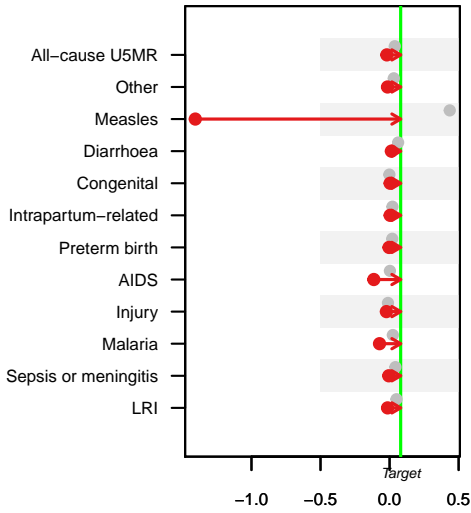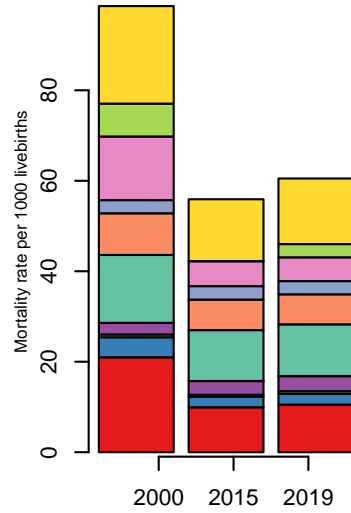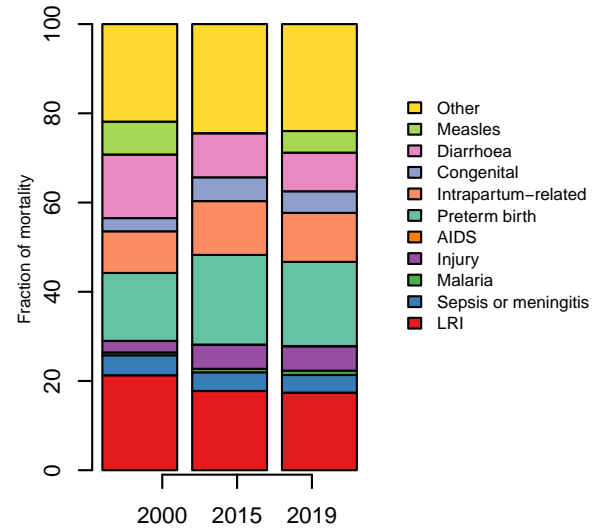

### Yemen (Neonatal)

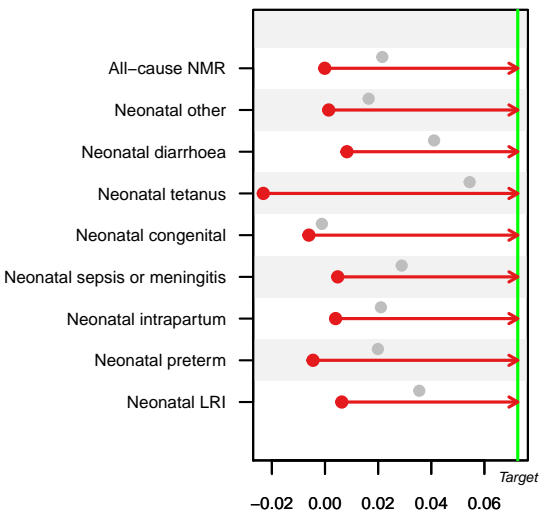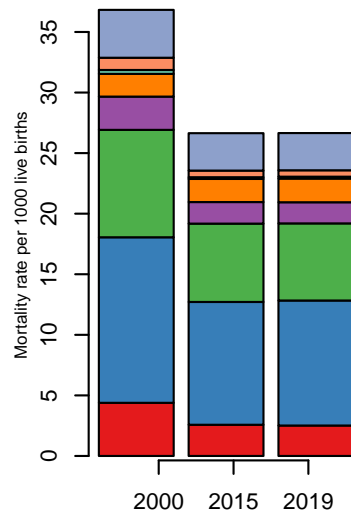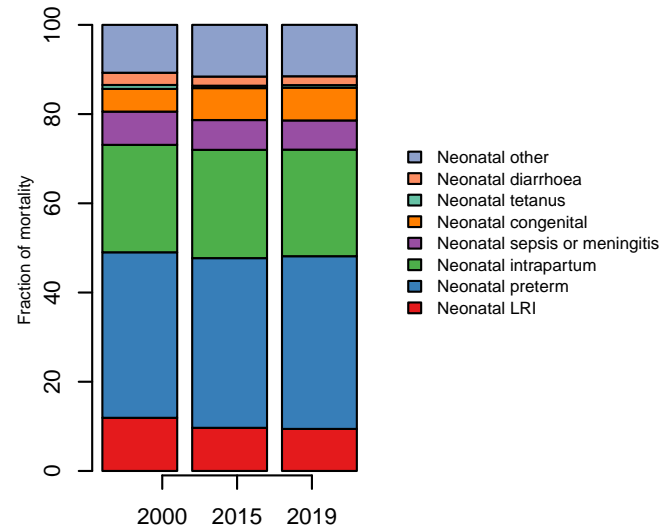

● 2000 – 2015      ● 2015 – 2019 (not on target)      → Deficit to target      ○ 2015 – 2019 (on target)



### South Africa (Under five)

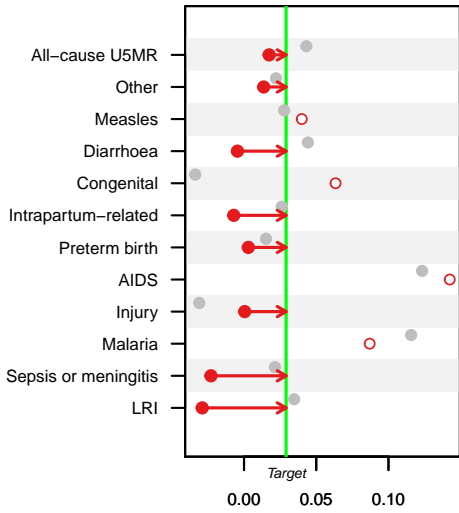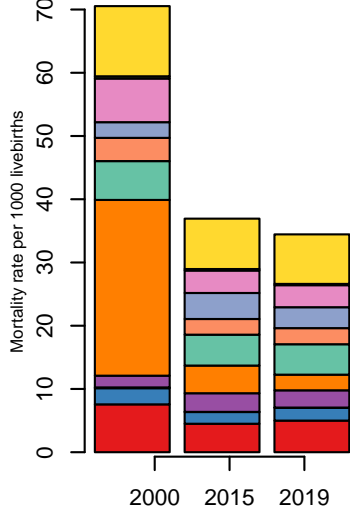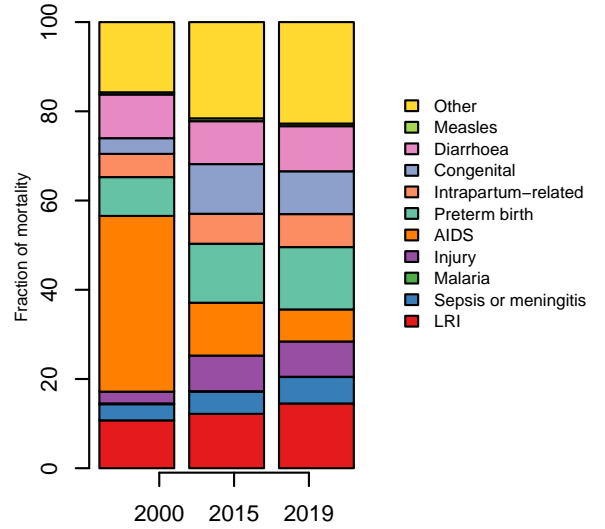

### South Africa (Neonatal)

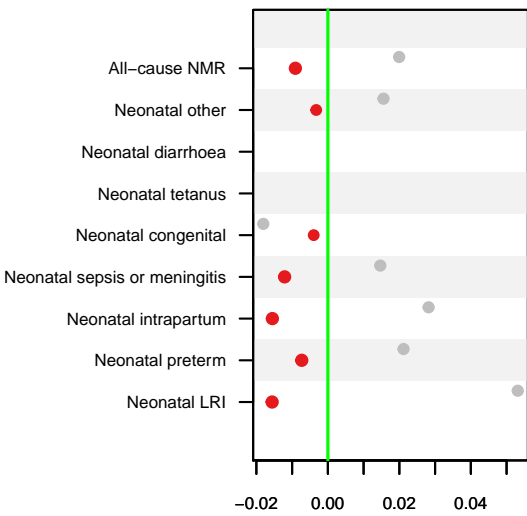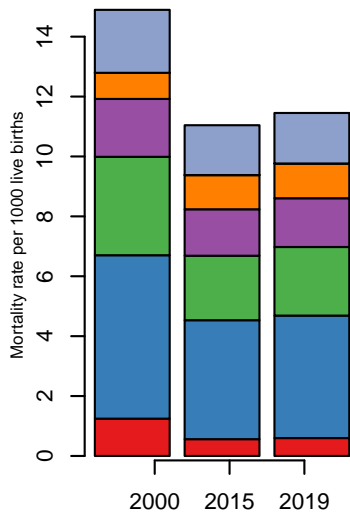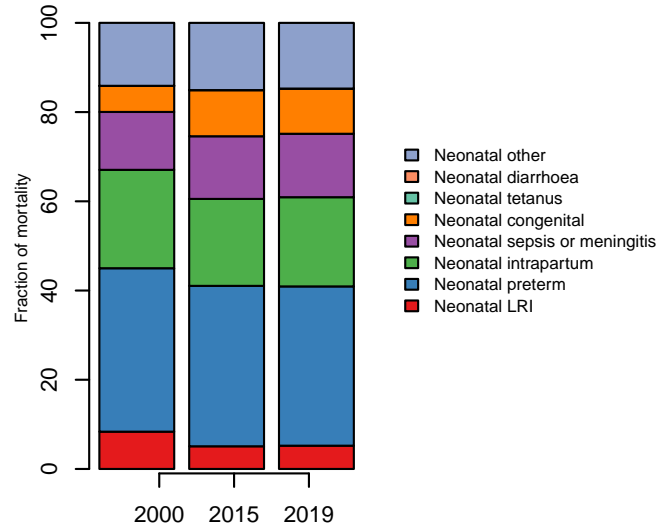

● 2000 – 2015      ● 2015 – 2019 (not on target)      → Deficit to target      ○ 2015 – 2019 (on target)

### Zambia (Under five)

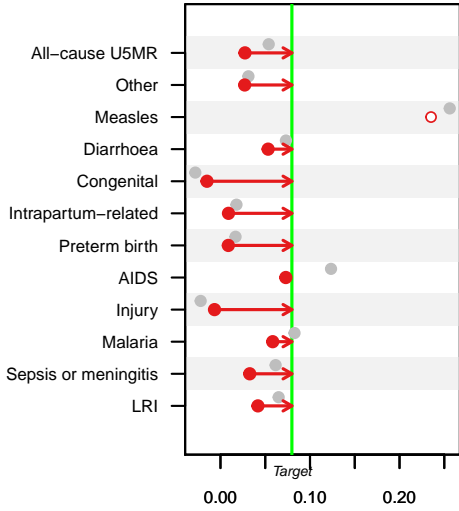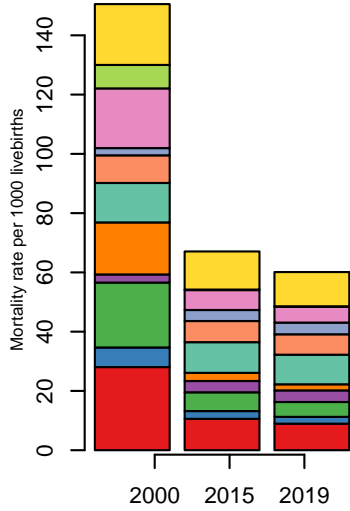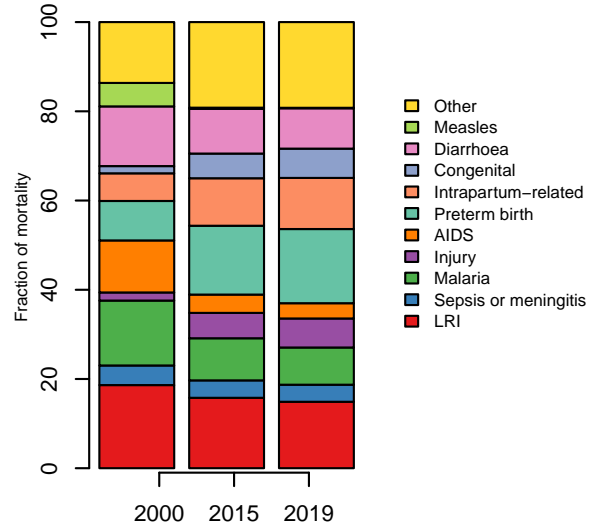

### Zambia (Neonatal)

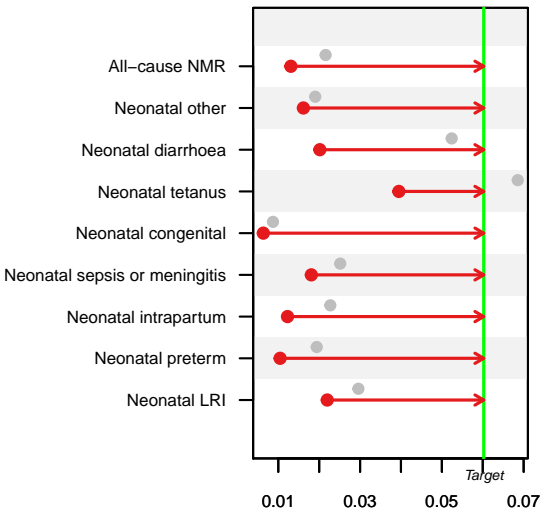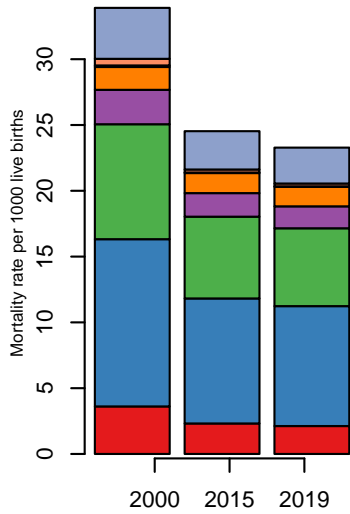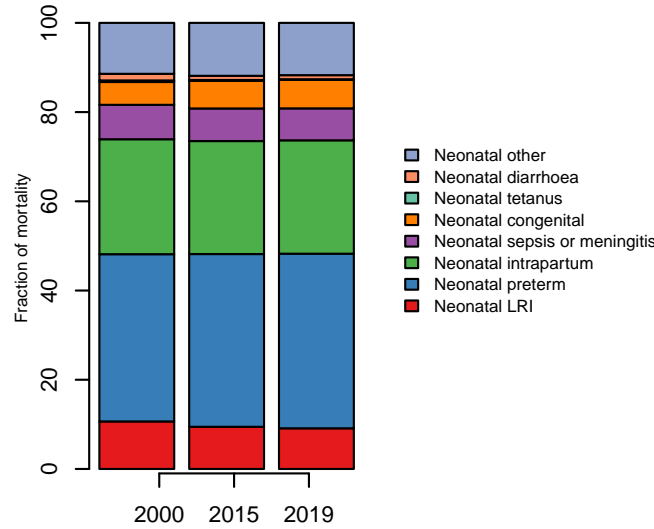

● 2000 – 2015      ● 2015 – 2019 (not on target)      → Deficit to target      ○ 2015 – 2019 (on target)

### Zimbabwe (Under five)

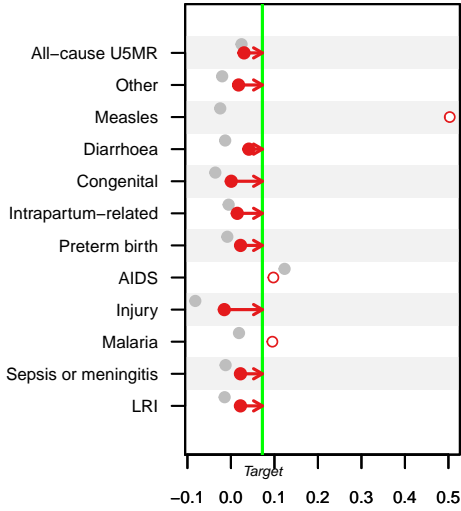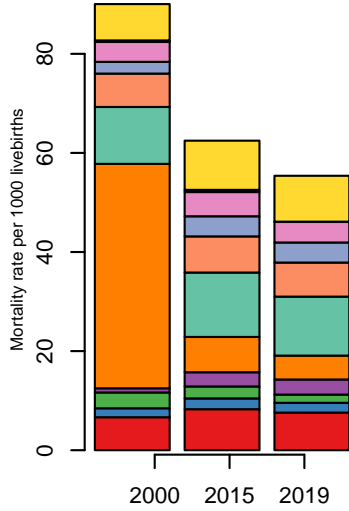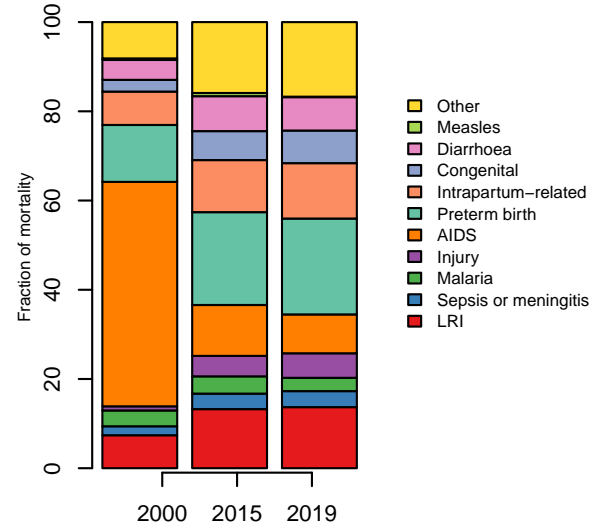

- Other
- Measles
- Diarrhoea
- Congenital
- Intrapartum-related
- Preterm birth
- AIDS
- Injury
- Malaria
- Sepsis or meningitis
- LRI

### Zimbabwe (Neonatal)

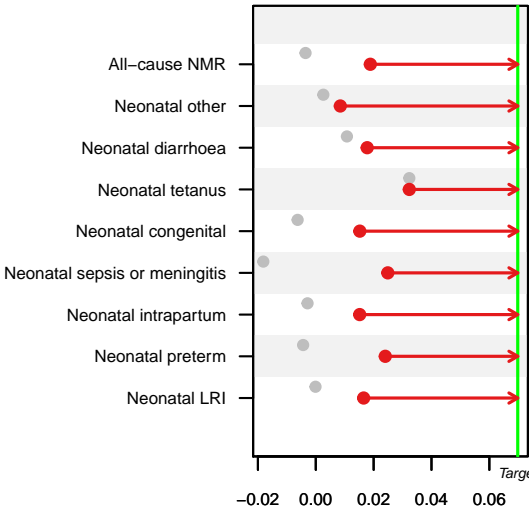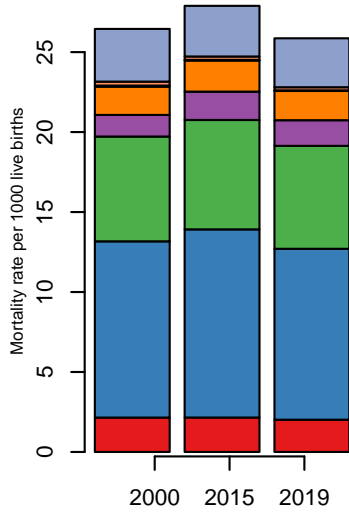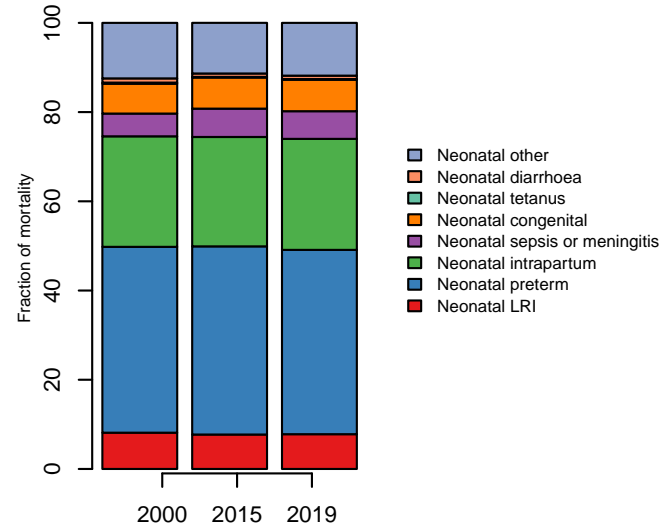

- Neonatal other
- Neonatal diarrhoea
- Neonatal tetanus
- Neonatal congenital
- Neonatal sepsis or meningitis
- Neonatal intrapartum
- Neonatal preterm
- Neonatal LRI

● 2000 – 2015      ● 2015 – 2019 (not on target)      → Deficit to target      ○ 2015 – 2019 (on target)
